# Supplementary material for: Co-SAC catalyzed utilization of methanol and ethanol in the transfer hydrogenation of azo bonds: experimental and theoretical studies
Source: Royal Society of Chemistry journal article supplement (doi:10.1039/d3gc02725b), 2023-01-01
Supplement: d3gc02725b1.pdf [file d3gc02725b1.pdf]

## Supporting Information

### Co-SAC catalyzed utilization of methanol and ethanol in the transfer hydrogenation of azo bonds: experimental and theoretical studies

Dibyajyoti Panja,<sup>a</sup> Sadhan Dey,<sup>a</sup> Rohini Saha,<sup>b</sup> Rajib Sahu,<sup>c</sup> Gourab Kanti Das,<sup>b</sup> Preeti Bhobe,<sup>d</sup> and Sabuj Kundu<sup>a\*</sup>

<sup>a</sup> Department of Chemistry, Indian Institute of Technology Kanpur,  
Kanpur-208016, Uttar Pradesh (U.P.), India

\*Email: [sabuj@iitk.ac.in](mailto:sabuj@iitk.ac.in)

<sup>b</sup> Department of Chemistry, Visva-Bharati, Santiniketan-731235, West-Bengal, India

<sup>c</sup> Max-Planck-Institut für Eisenforschung GmbH, Max-Planck-Straße 1, D-40237  
Düsseldorf, Germany

<sup>d</sup> Department of Physics, Indian Institute of Technology Indore,  
Simrol-453552, Madhya Pradesh (M.P.), India

## Table of Contents

|                                                                          |      |
|--------------------------------------------------------------------------|------|
| 1. General consideration                                                 | S3   |
| 2. Procedure for synthesis of Co-Phen/T catalysts                        | S3   |
| 3. Procedure for synthesis of the azo compounds                          | S4   |
| 4. General synthetic procedures                                          | S4   |
| 5. Optimization details for the transfer hydrogenation of azobenzenes    | S5   |
| 6. Procedure for catalyst recyclization                                  | S7   |
| 7. The time-dependent experiment                                         | S8   |
| 8. Kinetic and control experiments                                       | S9   |
| 9. Material characterization                                             | S15  |
| 10. Spectral data for the amines                                         | S21  |
| 11. Computational details                                                | S26  |
| 12. Copies of $^1\text{H}$ and $^{13}\text{C}$ NMR spectra of the amines | S119 |
| 13. References                                                           | S145 |

## 1. General Consideration

### Reagent information.

Unless otherwise stated, all the experiments were carried out under argon atmosphere using either argon filled Glove box or standard Schlenk line technique. Glass apparatus were oven dried immediately prior to use. Solvents were dried according to literature methods. All the solvents were eventually distilled over sodium under argon atmosphere and deoxygenated prior to use. All the reagents were purchased from Sigma-Aldrich, Alfa-Aesar, SD-fine chemicals, Avra, Spectrochem. Silica gel (100-200 mesh) was used for the column chromatography with a gradient elution of hexane/ethyl acetate, based on alumina TLC plate.

### Analytical information.

$^1\text{H}$  and  $^{13}\text{C}$  NMR spectra were recorded on JEOL 400 MHz and 500 MHz spectrometer using  $\text{CDCl}_3$  and  $\text{DMSO-}d_6$ . All  $^1\text{H}$  NMR experiments were reported in parts per million (ppm) unit and were measured relative to the signals for residual chloroform (7.24 ppm) or  $\text{DMSO-}d_6$  (2.50 ppm) in the deuterated solvent and coupling constant (J) was reported in hertz (Hz). All  $^1\text{H}$  decoupled  $^{13}\text{C}$  NMR spectra were reported in ppm relative to deuterated chloroform (77.1 ppm) or  $\text{DMSO-}d_6$  (39.5 ppm). All the GC analysis were performed using Perkin Elmer Clarus 600 Gas Chromatograph and High-resolution mass spectra were recorded on Agilent 6230 LC/TOF mass spectrometer.

## 2. Procedure for synthesis of Co-Phen/T catalysts

The catalysts were synthesized following literature reports<sup>1-3</sup> with slight modifications. At first,  $\text{Co}(\text{OAc})_2 \cdot 4\text{H}_2\text{O}$  (2 mmol) was dissolved in ethanol (30 mL) then phenanthroline (12 mmol) was added and reaction mixture was heated at 60 °C for 2h. Next, the reaction mixture was cooled to room temperature and carbon powder (carbon black, acetylene, Thermo-Fisher Chemicals; CAS: 1333-86-4) (3 g) was added. Afterwards, the resultant reaction mixture was stirred for 24 h at room temperature. Next, ethanol was removed slowly under reduced pressure and the reaction mixture was dried and the sample was grinded to fine powder. Then, it was subjected for pyrolysis at various temperature (600 °C - 1000 °C) for 2 h with the ramp of 1 °C/min under  $\text{N}_2$  atmosphere. Afterwards, 100 mL 8 N HCl solution was added and stirred for 24 h at room temperature. Then the slurry was filtered and washed with deionized water. Afterwards, the material was centrifuged with ethanol followed by drying in air at 80 °C for overnight to prepare the cobalt catalysts. (Scheme S1).

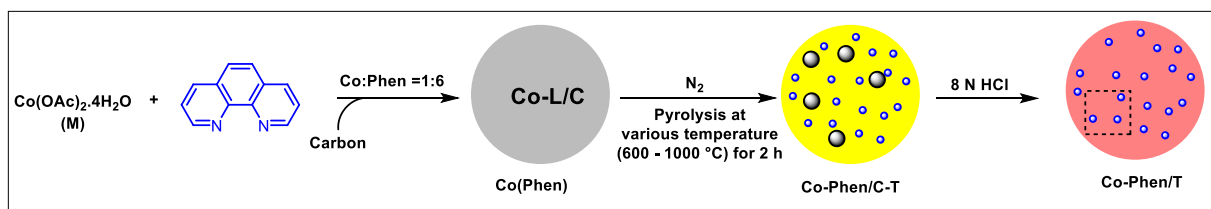

**Scheme S1.** Preparation of the catalysts.

### 3. Procedure for synthesis of azo compounds

#### Symmetric azobenzene:

##### Method-I<sup>4</sup>

In a 100 mL RB, 1.0 g of amine was dissolved in 50 mL of toluene. To this solution, 10 equiv. of activated  $\text{MnO}_2$  was added. Then, the mixture was refluxed for 24-48 h. Then, the reaction mixture was filtered through Celite and washed with toluene. Finally, the desired product was purified by flash column chromatography using silica (eluted with ethyl acetate/hexane).

##### Method-II<sup>5</sup>

In a 100 mL RB, 1.0 g of amine was dissolved in 10 mL of methanol and kept in ice bath. To this solution,  $\text{NaOCl}$  (20 equiv.) was added dropwise. Then, the mixture was stirred for overnight. Next, the reaction mixture was extracted with EtOAc and dried over anh.  $\text{Na}_2\text{SO}_4$ . Finally, the desired product was purified by flash column chromatography using silica (eluted with ethyl acetate/hexane).

#### Unsymmetric azobenzene:<sup>4</sup>

To a solution of nitrosobenzene (5 mmol) in glacial acetic acid (12 mL) and EtOH (3 mL), the amine (1.0 equiv.) was added. The reaction mixture was stirred at room temperature for 12 h. Then, the mixture was poured into ice water and filtered. Finally, the desired product was purified by flash column chromatography using silica (eluted with ethyl acetate/hexane).

### 4. General synthetic procedures

#### Transfer hydrogenation of azo compounds using ethanol

To an oven dried 9 mL screw cap tube, a magnetic stir-bar, azobenzene (0.5 mmol),  $\text{Cs}_2\text{CO}_3$  (0.125 mmol), Co-Phen/800 (2.2 mol % Co) and ethanol (5 mL) were added under argon atmosphere. Then, the tube was sealed and placed in a preheated oil bath at 130 °C for 24 h. After completion of the reaction, the tube was allowed to cool at room temperature. Then, 25  $\mu\text{L}$  reaction mixture was syringed out and filtered through a small plug of silica and subjected for GC analysis using mesitylene as internal standard to determine conversion of the azo

compounds. The remaining solvent was evaporated under reduced pressure and the final product was purified by basic alumina column chromatography using ethyl acetate/hexane as eluent.

### Transfer hydrogenation of azo compounds using methanol

To an oven dried 9 mL screw cap tube, a magnetic stir-bar, azobenzene (0.5 mmol), Cs<sub>2</sub>CO<sub>3</sub> (0.375 mmol), Co-Phen/800 (8 mol % Co) and methanol (5 mL) were added under argon atmosphere. Then, the tube was sealed and placed in a preheated oil bath at 130 °C for 24 h. After completion of the reaction, the tube was allowed to cool at room temperature. Then, a 25 µL reaction mixture was syringed out and filtered through a small plug of silica and subjected for GC analysis using mesitylene as internal standard to determine conversion of the azo compounds. The remaining solvent was evaporated under reduced pressure and the final product was purified by basic alumina column chromatography using ethyl acetate/hexane as eluent.

### 5. Optimization details for the transfer hydrogenation azobenzene

**Table S1.** Catalyst screening <sup>a</sup>

| Entry | Catalyst (mol%)    | Conversion of 1a (%) | Yield of 1b (%) |
|-------|--------------------|----------------------|-----------------|
| 1     | Co-Phen/800 (1.3)  | >99                  | >99             |
| 2     | Co-Phen/600 (1.3)  | 15                   | 15              |
| 3     | Co-Phen/700 (1.3)  | 44                   | 44              |
| 4     | Co-Phen/900 (1.3)  | 61                   | 61              |
| 5     | Co-Phen/1000 (1.3) | 40                   | 40              |

<sup>a</sup>Reaction conditions: Azobenzene (0.15 mmol), Co-cat. (1.3 mol%) and Cs<sub>2</sub>CO<sub>3</sub> (0.075 mmol) at 150 °C for 15 h; conversions and yields were determined by GC using mesitylene as an internal standard.

**Table S2.** Base screening <sup>a</sup>

| Entry | Base                                       | Conversion of 1a (%)           | Yield of 1b (%)                |
|-------|--------------------------------------------|--------------------------------|--------------------------------|
| 1     | <b>Cs<sub>2</sub>CO<sub>3</sub> (0.75)</b> | <b>&gt;99 (22)<sup>a</sup></b> | <b>&gt;99 (22)<sup>a</sup></b> |
| 2     | Na <sub>2</sub> CO <sub>3</sub> (0.75)     | 40                             | 40                             |
| 3     | K <sub>2</sub> CO <sub>3</sub> (0.75)      | 75                             | 75                             |
| 4     | NaOH (0.75)                                | >99 (12) <sup>[b]</sup>        | >99 (12) <sup>[b]</sup>        |
| 5     | KOH (0.75)                                 | 70                             | 70                             |
| 6     | CsOH.H <sub>2</sub> O (0.75)               | >99 (9) <sup>[b]</sup>         | >99 (9) <sup>[b]</sup>         |
| 7     | <sup>t</sup> BuOK (0.75)                   | 88                             | 88                             |
| 8     | NaOMe                                      | 70                             | 70                             |

<sup>a</sup> Reaction conditions: Azobenzene (0.15 mmol), Co-cat. (1.3 mol%) and bases (0.075 mmol) at 150 °C for 15 h; [b] 3 h; conversions and yields were determined by GC using mesitylene as an internal standard.

**Table S3.** Optimization of the catalyst, base and temperature (using ethanol) <sup>a</sup>

| Entry    | Cat (mol%) | Base (equiv.) | Time (h)  | Temp. (°C) | Conv. of 1a (%) | Yield of 1b (%) |
|----------|------------|---------------|-----------|------------|-----------------|-----------------|
| 1        | 1.3        | 0.75          | 15        | 150        | >99             | >99             |
| 2        | 1.3        | 0.75          | 15        | 140        | 87              | 87              |
| 3        | 1.3        | 0.75          | 15        | 130        | 66              | 66              |
| 4        | 1.3        | 0.75          | 15        | 120        | 45              | 45              |
| 5        | 1.3        | 0.75          | 15        | 110        | 24              | 24              |
| 6        | 1.3        | 0.75          | 24        | 130        | 73              | 73              |
| 7        | 1.3        | 0.75          | 24        | 130        | >99             | >99             |
| 8        | 2.2        | 0.5           | 24        | 130        | >99             | 98              |
| <b>9</b> | <b>2.2</b> | <b>0.25</b>   | <b>24</b> | <b>130</b> | <b>90</b>       | <b>90</b>       |

|    |     |      |    |     |      |      |
|----|-----|------|----|-----|------|------|
| 10 | 2.2 | 0.1  | 24 | 130 | 24   | 24   |
| 11 | -   | 0.25 | 24 | 130 | N.D. | N.D. |
| 12 | 2.2 | -    | 24 | 130 | N.D. | N.D. |

<sup>a</sup> Reaction conditions: Azobenzene (0.15 mmol), Co-cat. (2.2 mol%) and bases (x mmol) at 150 °C for 24 h; conversions and yields were determined by GC using mesitylene as an internal standard.

**Table S4.** Optimization of the catalyst, base and temperature (using methanol) <sup>a</sup>

| Entry           | Cat<br>(mol%; Co) | Cs <sub>2</sub> CO <sub>3</sub><br>(equiv.) | Conv.<br>of 1a (%) | Yield<br>of 1b (%) |
|-----------------|-------------------|---------------------------------------------|--------------------|--------------------|
| 1               | 2.2               | 0.25                                        | 26                 | 26                 |
| 2               | 3                 | 0.25                                        | 32                 | 32                 |
| 3               | 6                 | 0.25                                        | 44                 | 44                 |
| 4               | 7.5               | 0.25                                        | 50                 | 50                 |
| 5               | 8                 | 0.25                                        | 62                 | 62                 |
| 6               | 8                 | 0.5                                         | 75                 | 75                 |
| <b>7</b>        | <b>8</b>          | <b>0.75</b>                                 | <b>88</b>          | <b>88</b>          |
| 8               | -                 | 0.75                                        | N.D.               | N.D.               |
| 9               | 8                 | -                                           | N.D.               | N.D.               |
| 10 <sup>b</sup> | 2.2               | 0.75                                        | 87                 | 87                 |

<sup>a</sup> Reaction conditions: Azobenzene (0.15 mmol), Co-cat. (x mol%) and bases (x mmol) at 130 °C for 24 h; <sup>b</sup>150 °C for 24 h; conversions and yields were determined by GC using mesitylene as an internal standard.

## 6. Procedure for catalyst recyclization

The recyclization of the catalyst was carried out for the transfer hydrogenation of azobenzene using the procedure as follows: azobenzene (2.5 mmol), Co-Phen/800 (2.2/ 8 mol%), Cs<sub>2</sub>CO<sub>3</sub> (1.25/ 3.75 mmol), ethanol/ methanol (35 mL) were taken in a 100 mL pressure tube. Afterwards, the tube was placed in a preheated oil bath at 130 °C (oil bath temperature) for 24 h. After completion of the reaction, the tube was allowed to cool at room temperature and yields were determined by GC using mesitylene as the internal standard. In each run, after reaction, the catalyst was separated by centrifugation, washed thoroughly with methanol, and

dried at 90 °C. Then, the dried catalyst was further used, without any purification or reactivation (Fig. S1).

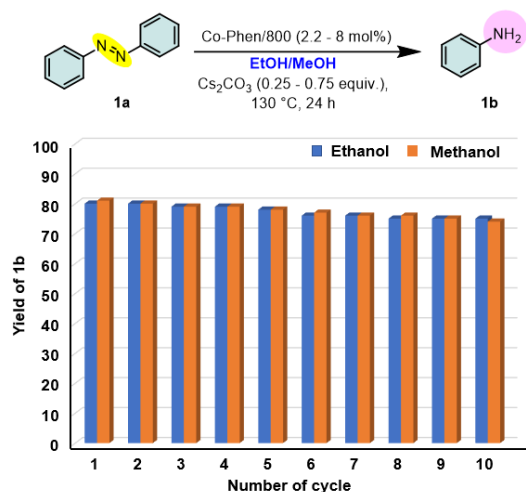

Fig. S1 Recyclability test of Co-Phen/800 catalyst.

## 7. The time-dependent experiment

Several experiments for the transfer hydrogenation of azobenzene using ethanol were conducted following the outlined procedure with varying time (0.5 h, 1 h, 3 h, 6 h, 9 h, 12 h and 15 h); An oven dried pressure tube was charged with azobenzene (0.15 mmol), Co-Phen/800 (2.2 mol % Co), Cs<sub>2</sub>CO<sub>3</sub> (0.0375 mmol) followed by the addition of ethanol (1.5 mL). All the tubes were placed in a preheated oil-baths at 130 °C with stirring and the progress of the reaction was analysed by GC using mesitylene as the internal standard. All the reactions were repeated twice, and the average data was plotted as concentration (mmol) vs time (h) (Fig. S2).

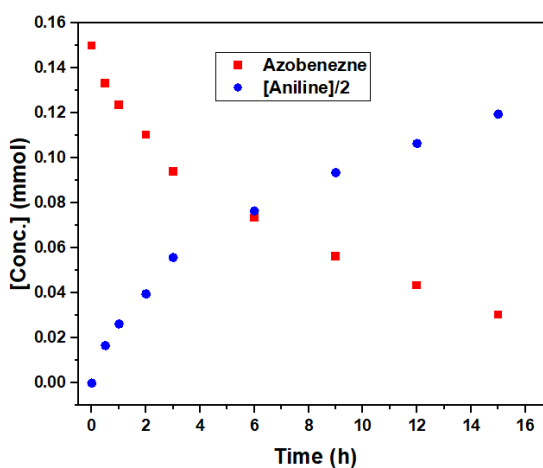

Fig. S2 Time dependent product distribution experiment for the transfer hydrogenation of azobenzene.



## 8. Kinetic and control experiments

### 8.1. Study of electronic effect for *p*-substituted symmetric azobenzene

In two different 4 mL pressure tube, (4,4'-CH<sub>3</sub>)-azobenzene (0.15 mmol) and (4,4'-CF<sub>3</sub>)-azobenzene (0.15 mmol) were taken along with Cs<sub>2</sub>CO<sub>3</sub> (0.0375 mmol), Co-Phen/800 (2.2 mol%) and ethanol (1.5 mL) under argon atmosphere. Then, the tubes were sealed and placed in a preheated oil bath at 130 °C for 6 h. After completion of the reaction, the tube was allowed to cool at room temperature. The conversions and yields of the reaction were determined by GC analysis using mesitylene as internal standard.

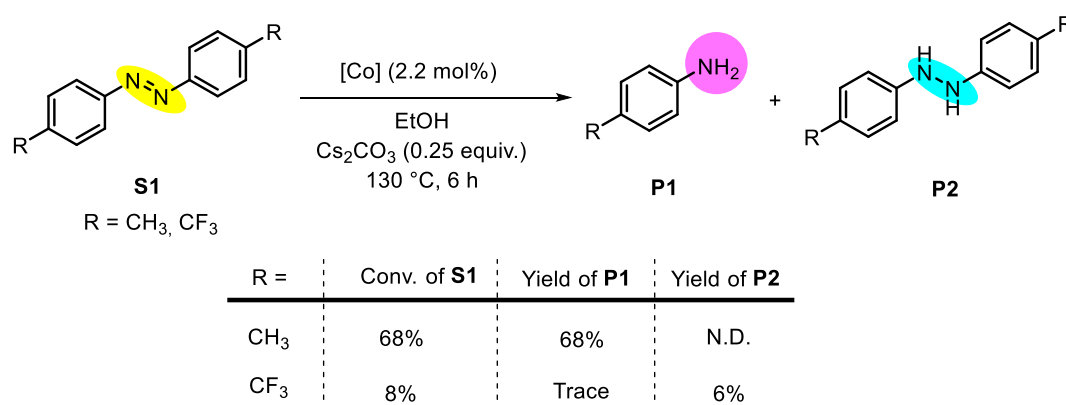

**Scheme S2.** Controls experiments for electronic studies of *p*-substituted symmetric azobenzenes.

### 8.2. Study of electronic effect for *p*-substituted symmetric hydrazobenzene

In two different 4 mL pressure tube, (4-CH<sub>3</sub>)-hydrazobenzene (0.15 mmol) and (4-CF<sub>3</sub>)-hydrazobenzene (0.15 mmol) were taken, along with Cs<sub>2</sub>CO<sub>3</sub> (0.0375 mmol), Co-Phen/800 (2.2 mol%) and ethanol (1.5 mL) under argon atmosphere. Then, the tubes were sealed and placed in a preheated oil bath at 130 °C for 6 h. After completion of the reaction, the tube was allowed to cool at room temperature. The conversions and yields were calculated by GC analysis using mesitylene as internal standard.

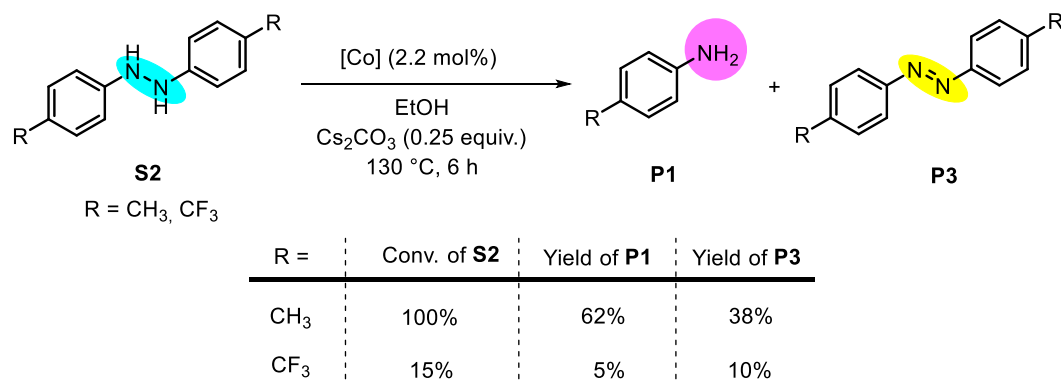

**Scheme S3.** Controls experiments for electronic studies of *p*-substituted symmetric hydrazobenzenes.

### 8.3. Study on the effect of counter-cation in the transfer hydrogenation azobenzene

In two different 4 mL pressure tube, azobenzene (0.15 mmol) along with Co-Phen/800 (2.2 mol%) and ethanol (1.5 mL) were taken under argon atmosphere. In one pressure tube  $K_2CO_3$  (0.0375 mmol) and 18-crown-ether (0.075 mmol) and in another tube  $Cs_2CO_3$  (0.0375 mmol) and dibenzo-21-crown-7 (0.075 mmol) were added. Then, the tubes were sealed and placed in a preheated oil bath at 130 °C for 24 h. After completion of the reaction, the tube was allowed to cool at room temperature. The conversions and yields of the reaction were determined by GC analysis using mesitylene as internal standard.

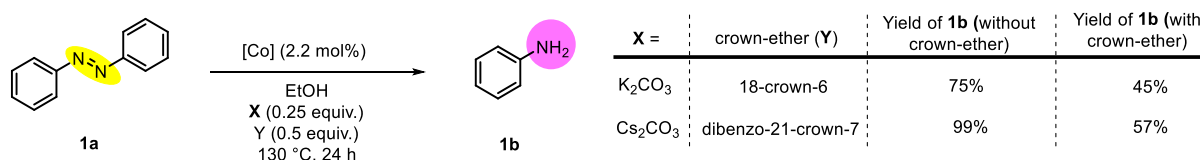

**Scheme S4.** Controls experiments on the study of counter-cation.

### 8.4. Study of the detection of formate in the reaction medium

In a 4 mL pressure tube, azobenzene (0.15 mmol), Co-Phen/800 (8 mol%), and  $Cs_2CO_3$  (0.1125 mmol) were taken in 1.5 mL methanol under argon atmosphere. Then, the tubes were sealed and placed in a preheated oil bath at 130 °C for 24 h. After completion of the reaction, the tube was allowed to cool at room temperature. Then the crude reaction mixture was analyzed though  $^1H$ -NMR in  $DMSO-d_6$ .

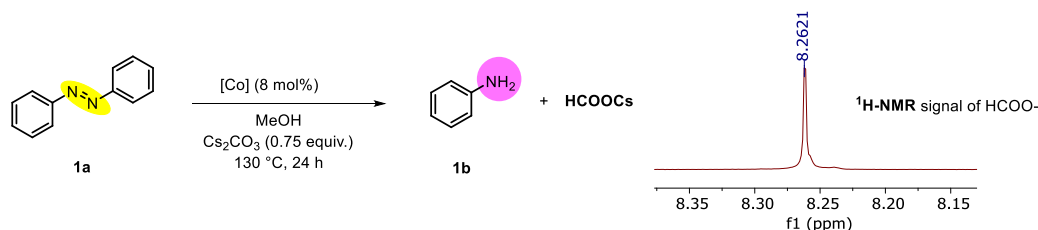

**Scheme S5.** Controls experiments for the detection of formate.

### 8.5. Study on the transfer hydrogenation of *p*- $COCH_3$ substituted azobenzene at various time interval

In a 4 mL pressure tube, azoarene **15a** (0.15 mmol), Co-Phen/800 (2.2 mol%), and  $Cs_2CO_3$  (0.0375 mmol), were taken in 1.5 mL ethanol. Then, the tube was sealed and placed in a

preheated oil bath at 130 °C (oil bath temperature) for 3-12 h. After completion of the reaction, the tube was allowed to cool at room temperature. Then, the reaction mixture was subjected for <sup>1</sup>H NMR analysis using 1,3,5-trimethoxybenzene as internal standard to determine conversion and yield of the product (Fig. S3).

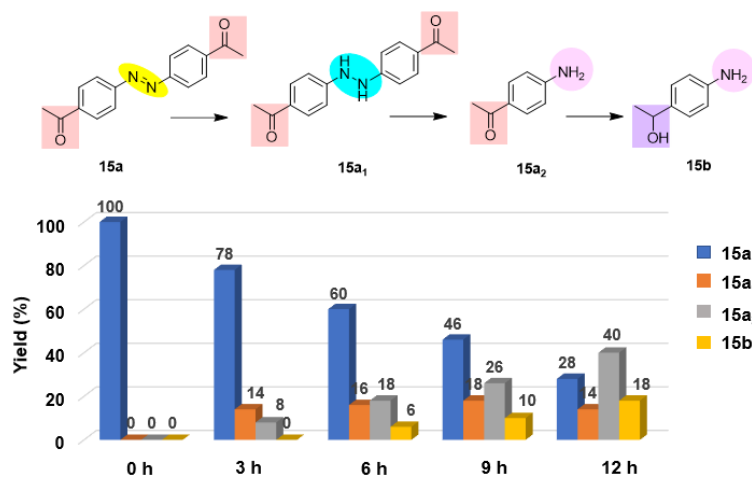

**Fig. S3** Time dependent product distribution experiment for the transfer hydrogenation of *p*-COCH<sub>3</sub> substituted azobenzene.

### 8.6. Study on the transfer hydrogenation of *p*-COCH<sub>3</sub>/NO<sub>2</sub> substituted unsymmetric azobenzene at various time interval

In a 4 mL pressure tube, azoarene **34a** (0.15 mmol), Co-Phen/800 (2.2 mol%), and Cs<sub>2</sub>CO<sub>3</sub> (0.0375 mmol), were taken in 1.5 mL ethanol. Then, the tube was sealed and placed in a preheated oil bath at 130 °C (oil bath temperature) for 3-12 h. After completion of the reaction, the tube was allowed to cool at room temperature. Then, the reaction mixture was subjected for <sup>1</sup>H NMR analysis using 1,3,5-trimethoxybenzene as internal standard to determine conversion and yield of the product (Fig. S4).

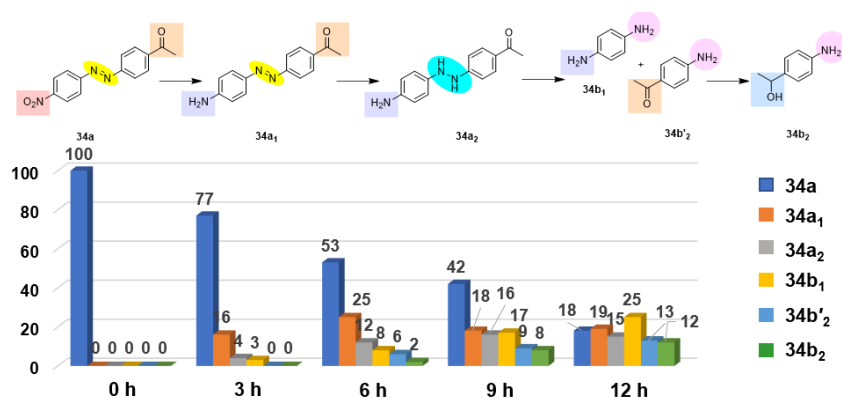

**Fig. S4** Time dependent product distribution experiment for the transfer hydrogenation of *p*-COCH<sub>3</sub>/NO<sub>2</sub> substituted azobenzene.

## 8.7. Determination of reaction order

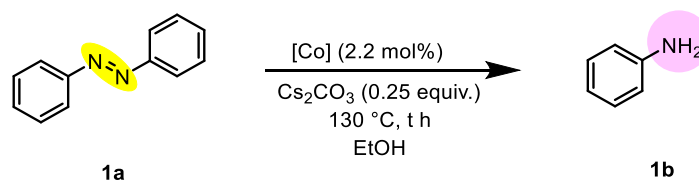

| No.    | 1a (mmol) | Cat. (mol%) | Cs <sub>2</sub> CO <sub>3</sub> (mmol) | Ethanol (mL) |
|--------|-----------|-------------|----------------------------------------|--------------|
| Run 1: | 0.15      | 2.2         | 0.0375                                 | 1.5          |
| Run 2: | 0.3       | 2.2         | 0.0375                                 | 1.5          |

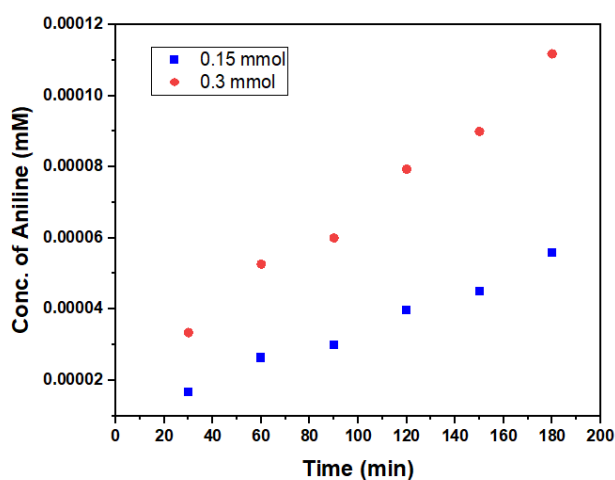

**Fig. S5** Determination of initial slopes for the transfer hydrogenation of azobenzene using ethanol; yields were calculated through GC analysis using mesitylene as internal standard.

Considering steady state approximation for ethanol

Initial slope for run 1 at 40 min ( $r_1$ ) =  $4.75 \times 10^{-7}$  (mM)/min =  $k$  [**1a** (0.15 mmol)]<sup>x</sup>

Initial slope for run 2 at 40 min ( $r_2$ ) =  $9.71 \times 10^{-7}$  (mM)/min =  $k$  [**1a** (0.30 mmol)]<sup>x</sup>

Comparing the initial slopes,

$$r_1/r_2 = 4.75 \times 10^{-7} / 9.71 \times 10^{-7} = (0.15/0.30)^x$$

$$\text{or, } 0.49 = (0.5)^x$$

$$\text{or, } \log(0.49) = \log(0.50)^x$$

$$\text{or, } x = \log(0.49) / \log(0.50)$$

$$\text{or, } x = 1.03 \approx 1$$

$$\text{So, rate} = k[\mathbf{1a}]^1$$

This experiment stated that the transfer hydrogenation of azobenzene follow a first order kinetics with respect to the azobenzene concentration.

## 8.8. Hammett studies

An oven dried screw cap tube was charged with *para*-substituted azobenzene derivative (0.15 mmol), Co-Phen/800 (2.2 mol % for Ethanol; 8 mol% for Methanol), Cs<sub>2</sub>CO<sub>3</sub> (0.0375 mmol), followed by the addition of Ethanol or Methanol (1.5 mL). All the tubes were placed in a preheated oil baths at 130 °C with stirring. The progress of the reaction was analysed by GC using mesitylene as internal standard. (Figure 1b and 1c (see manuscript); Table S5; Figure S4 and S5).

**Table S5.** Hammett Analysis with the *para*-Substitution Constant ( $\sigma_p$ )

| 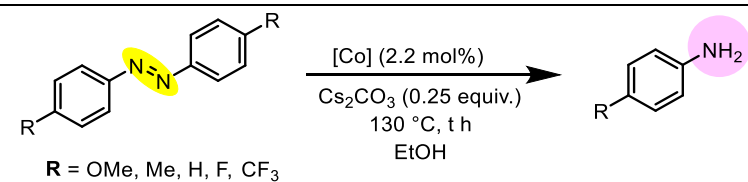   |                                     |           |                 |            |        |
|--------------------------------------------------------------------------------------|-------------------------------------|-----------|-----------------|------------|--------|
| Substrate                                                                            | $-(k \times 10^{-4} \text{ (min)})$ | $k_x/k_H$ | $\log(k_x/k_H)$ | $\sigma_p$ | $\rho$ |
| 4-4'-MeO-azobenzene                                                                  | 75.83                               | 3.07      | 0.48803         | -0.27      | -1.74  |
| 4-4'-Me-azobenzene                                                                   | 51.87                               | 2.10      | 0.3255          | -0.17      |        |
| azobenzene                                                                           | 24.70                               | 1         | 0               | 0          |        |
| 4-4'-F-azobenzene                                                                    | 14.65                               | 0.5932    | -0.22675        | 0.06541    |        |
| 4-4'-CF <sub>3</sub> -azobenzene                                                     | 3.03                                | 0.1227    | -0.91098        | 0.54       |        |
|  |                                     |           |                 |            |        |
| Substrate                                                                            | $-(k \times 10^{-4} \text{ (min)})$ | $k_x/k_H$ | $\log(k_x/k_H)$ | $\sigma_p$ | $\rho$ |
| 4-4'-MeO-azobenzene                                                                  | 61.10                               | 2.74      | 0.43866         | -0.27      | -1.72  |
| 4-4'-Me-azobenzene                                                                   | 39.92                               | 1.79      | 0.25525         | -0.17      |        |
| azobenzene                                                                           | 22.3                                | 1         | 0               | 0          |        |
| 4-4'-Br-azobenzene                                                                   | 6.58                                | 0.295     | -0.52935        | 0.232      |        |
| 4-4'-CF <sub>3</sub> -azobenzene                                                     | 2.65                                | 0.119     | -0.92301        | 0.54       |        |

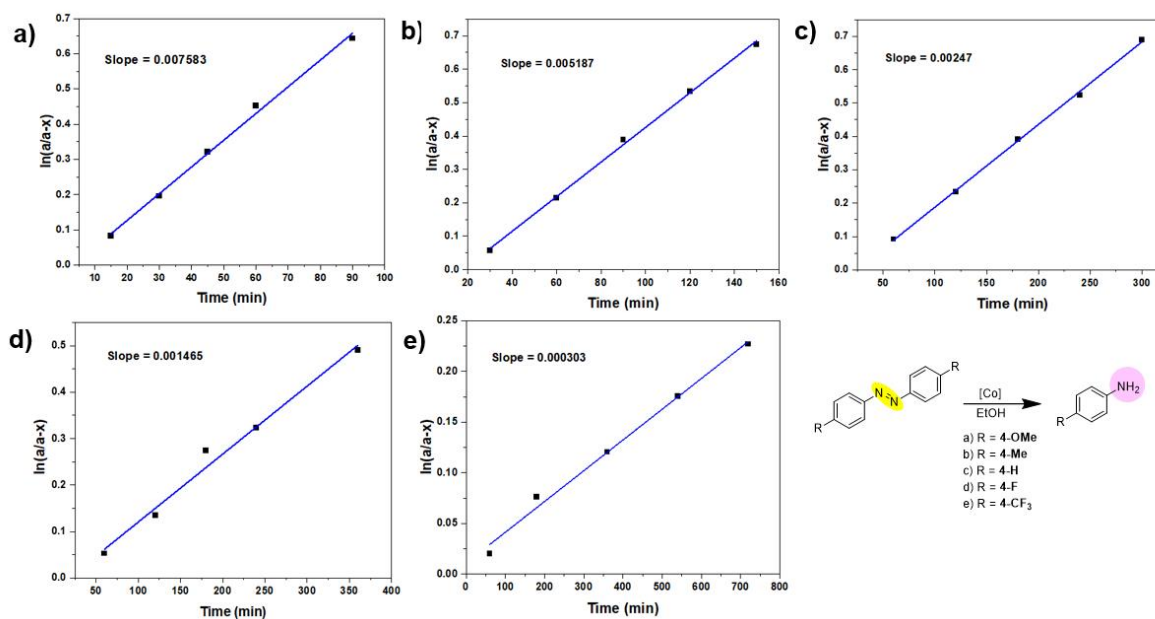

**Fig. S6** Determination of rate constant for the *para*-substituted azobenzene substrates during transfer hydrogenation using ethanol.

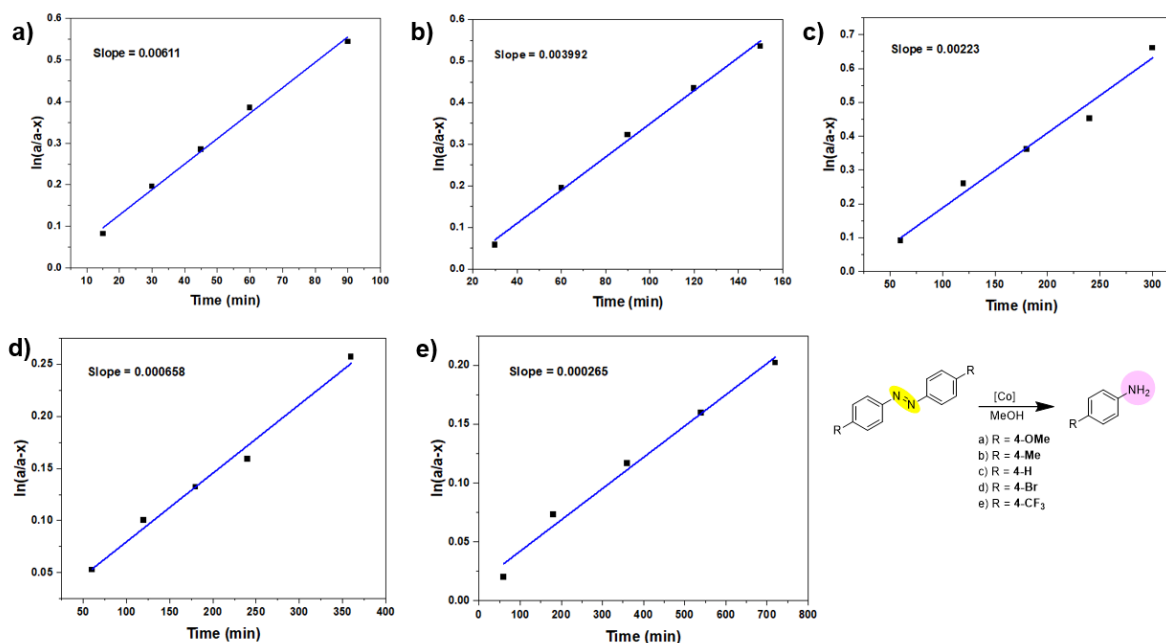

**Fig. S7** Determination of rate constant for the *para*-substituted azobenzene substrates during transfer hydrogenation using methanol.

### 8.9. Kinetic isotope effect (KIE) studies:

Parallel reactions for the transfer hydrogenation azobenzene were carried out using CH<sub>3</sub>OH and CD<sub>3</sub>OD under identical conditions following the outlined procedure. All the tubes were placed in a preheated oil-baths at 130 °C with stirring and the progress of the reaction was analysed by GC using mesitylene as internal standard.

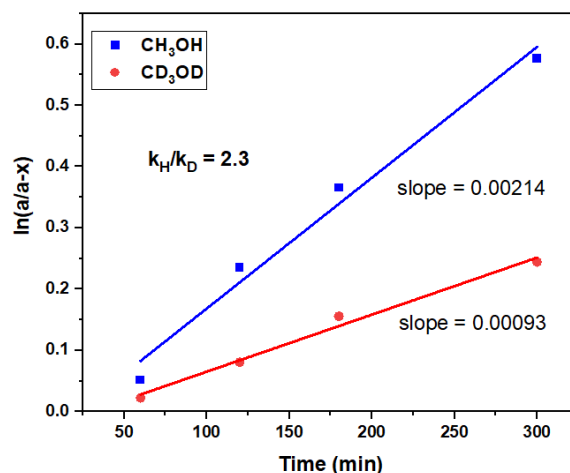

**Fig. S8** Kinetic isotopic effect analysis during the transfer hydrogenation azobenzene.

## 9. Material characterization

Powder X-ray diffraction (XRD) technique was used to investigate the effect of doped heteroatom on carbon structure. The analysis was performed by using Panalytical XPert diffractometer in presence of Cu-K $\alpha$  as X-ray source (1.54 Å). The ICPMS data was acquired using Agilent ICPMS 7900. X-Ray Photoelectron Spectroscopy (XPS) data was obtained by using PHI5000 Versa Probe II (FEI Inc.). Scanning transmission electron microscopy experiment was performed on a Thermo-Fisher probe-corrected Titan Themis at an operating voltage of 300 kV. High angle annular dark imaging was performed at a camera length of 195 mm. The microscope is equipped with Bruker SuperX detector for energy dispersive X-ray spectroscopy (EDX). Here, samples were deposited without any pretreatment on a holey carbon supported Cu-grid (mesh 300) and transferred to the microscope. Co K-edge XANES measurement was carried out in the fluorescence mode, using RIGAKU R-XAS laboratory spectrometer, equipped with a 3 kW X-ray source and Ge(220) monochromator. The incident and transmitted intensities were measured using a gas-filled ionization chamber and scintillation detector, respectively. The edge energy was calibrated using a Co metal foil in which Co is in Co(0) state. CoO (Sigma-Aldrich, 99.99% purity), Co<sub>3</sub>O<sub>4</sub> (Sigma-Aldrich, 99.99% purity) and Cobalt(II) Phthalocyanine (TCI Chemicals, >98% purity), where Co is in 2+ state. Textural and surface properties of heteroatom doped catalysts were characterized by N<sub>2</sub>-adsorption-desorption isotherms, measured at 77 K using Quantachrome Autosorb® iQ-MP / iQ-XR. Surface area and pore size of the catalyst were determined using the Brunauer–Emmett–Teller (BET) equation.

**Table S6** Comparative study between the Co-Phen/T catalysts

| Catalysts    | C <sup>a</sup><br>(at %) | O <sup>a</sup><br>(at %) | N <sup>a</sup><br>(at %) | Co <sup>a</sup><br>wt% (at %) | Co <sup>b</sup><br>wt% | BET <sub>Surface</sub><br>area (m <sup>2</sup> /g) | Average pore<br>size radius<br>(nm) <sup>c</sup> |
|--------------|--------------------------|--------------------------|--------------------------|-------------------------------|------------------------|----------------------------------------------------|--------------------------------------------------|
| Co-Phen/ 600 | 88.0                     | 7.8                      | 3.9                      | 1.41 (0.3)                    | 1.35                   | 43.36                                              | 0.10                                             |
| Co-Phen/700  | 94.0                     | 2.3                      | 3.4                      | 0.96 (0.2)                    | 0.92                   | 36.11                                              | 0.31                                             |
| Co-Phen/800  | 89.5                     | 4.8                      | 5.6                      | 0.48 (0.1)                    | 0.52                   | 50.78                                              | 0.16                                             |
| Co-Phen/900  | 88.5                     | 5.8                      | 5.6                      | 0.47 (0.1)                    | 0.41                   | 36.24                                              | 0.29                                             |
| Co-Phen/1000 | 81.9                     | 9.5                      | 8.2                      | 1.85 (0.4)                    | 1.70                   | 49.82                                              | 0.38                                             |

<sup>a</sup>From XPS analysis; <sup>b</sup>ICPMS; <sup>c</sup>BET analysis (BJH method)

### 9.1. PXRD pattern of the Co-Phen/T catalysts

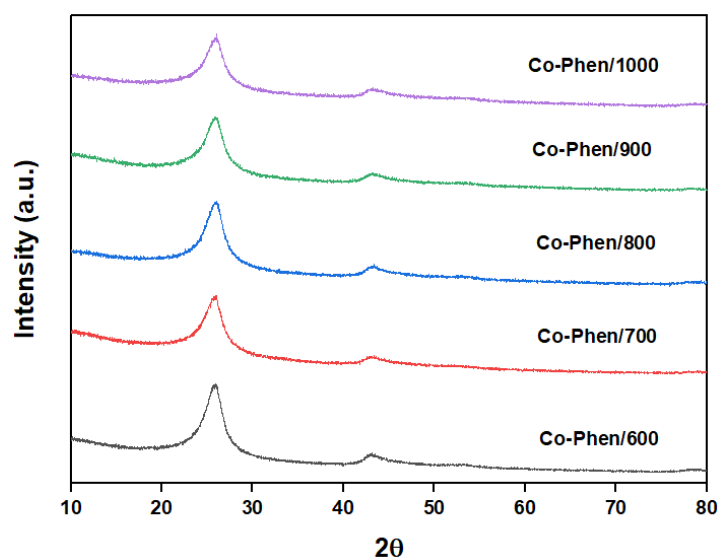

**Fig. S9** PXRD pattern of the Co-Phen/T catalysts.

### 9.2. XPS analysis of the Co-Phen/T catalysts

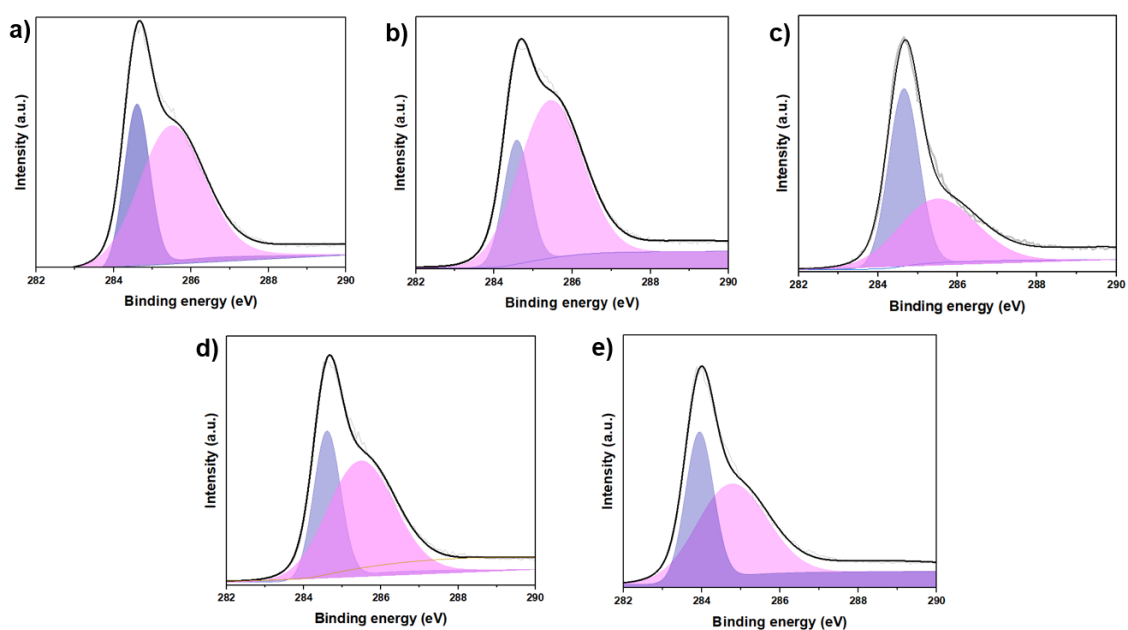



**Fig. S10** C<sub>1s</sub> XPS spectra of a) Co-Phen/600; b) Co-Phen/700; c) Co-Phen/800; d) Co-Phen/900; e) Co-Phen/1000

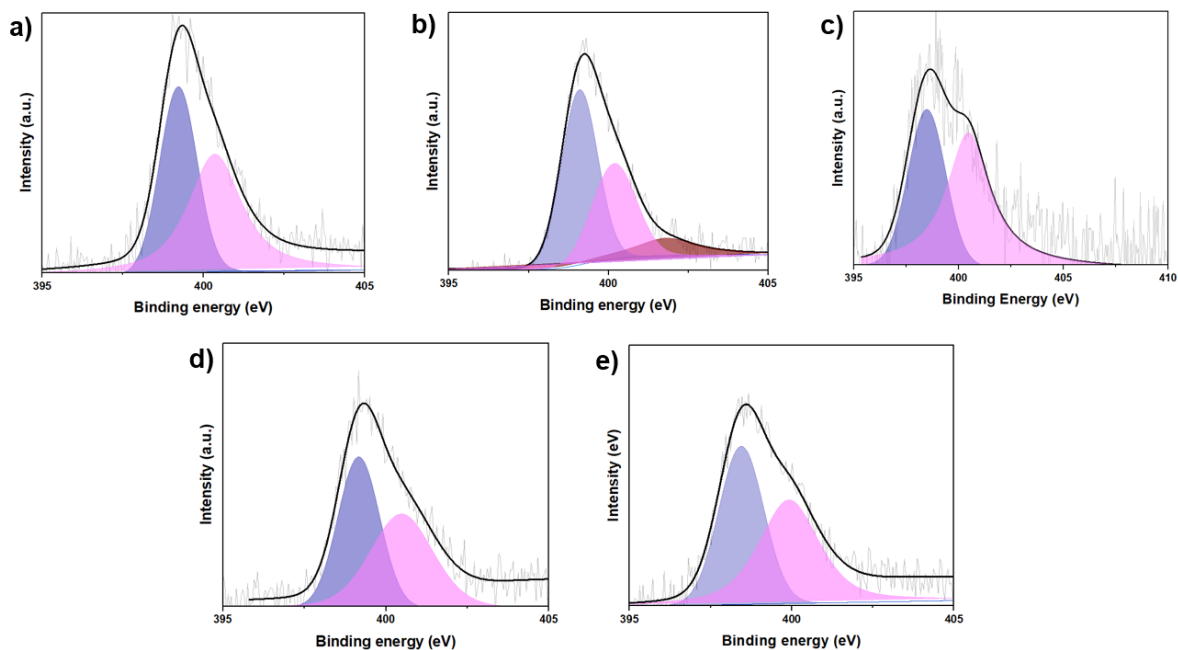

**Figure S11.** N<sub>1s</sub> XPS spectra of a) Co-Phen/600; b) Co-Phen/700; c) Co-Phen/800; d) Co-Phen/900; e) Co-Phen/1000.

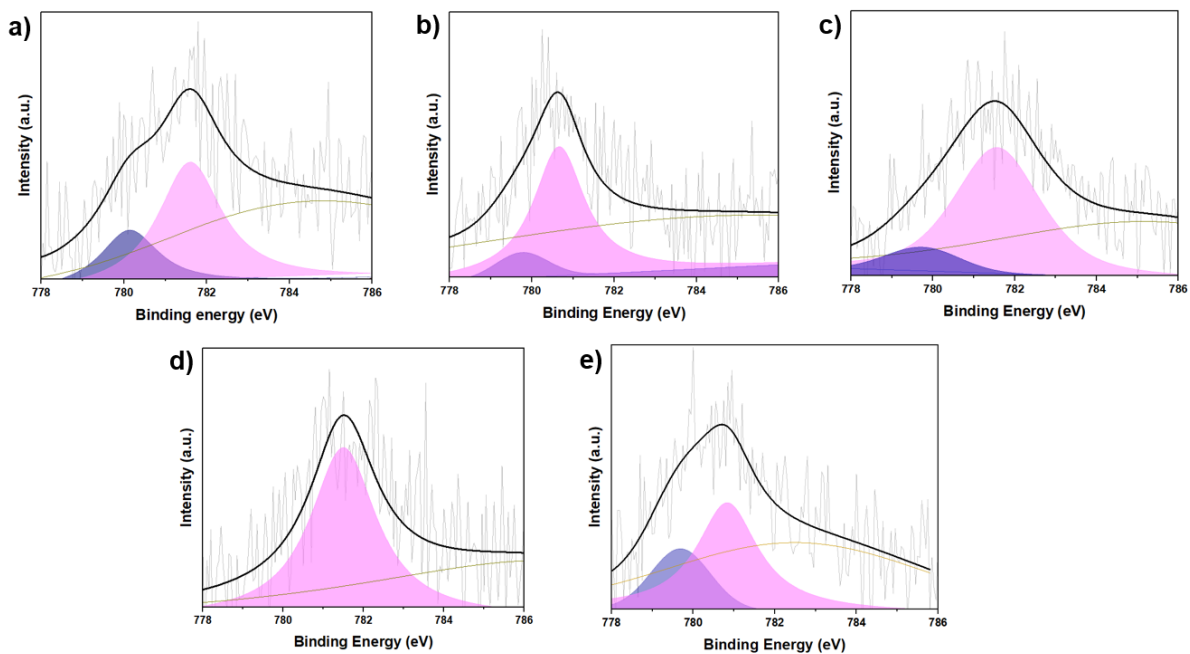

**Fig. S12** Co<sub>2p</sub> high resolution XPS spectra of a) Co-Phen/600; b) Co-Phen/700; c) Co-Phen/800; d) Co-Phen/900; e) Co-Phen/1000.

### 9.3. XAS analysis of Co-Phen/800

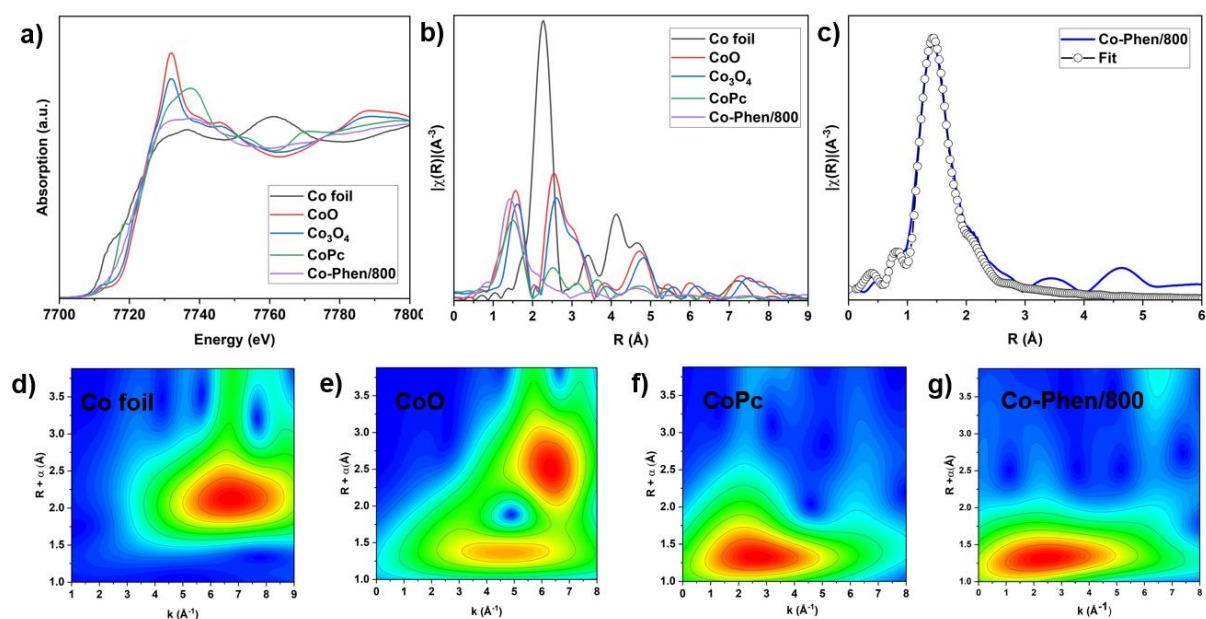

**Fig. S13** a) Comparative XANES b) FT-EXAFS spectra of Co(0), CoO, Co<sub>3</sub>O<sub>4</sub>, Co-phthalocyanine (CoPc) and Co-Phen/800, c) FT-EXAFS fitting result of Co-Phen/800 d-g) WT-EXAFS signals of Co-foil, CoO, CoPc and Co-Phen/800 respectively.

**Table S7.** EXAFS data fitting results of Co-Phen/800 catalyst.

| Sample      | Path | N <sup>a</sup> | R (Å) <sup>b</sup> |
|-------------|------|----------------|--------------------|
| Co-Phen/800 | Co-N | 3.6            | 1.89               |

<sup>a</sup> N is the coordination number. <sup>b</sup> R is the interatomic distance.

### 9.4. BET analysis of the Co-Phen/T catalyst

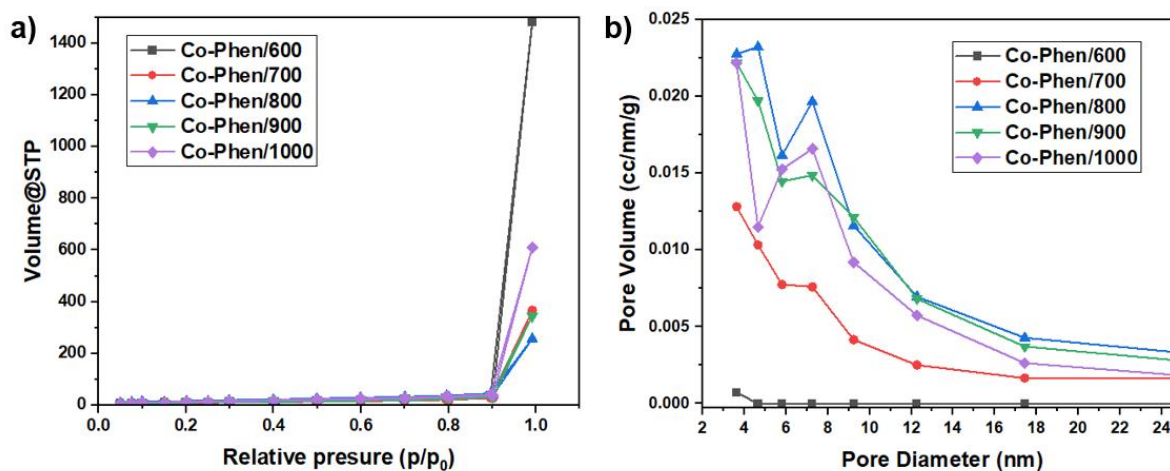

**Fig. S14** a) N<sub>2</sub> adsorption-desorption isotherm and b) pore-size distribution plot (BJH method) of Co-Phen/T catalysts.

## 9.5. BET analysis of the Co-Phen/800 catalyst

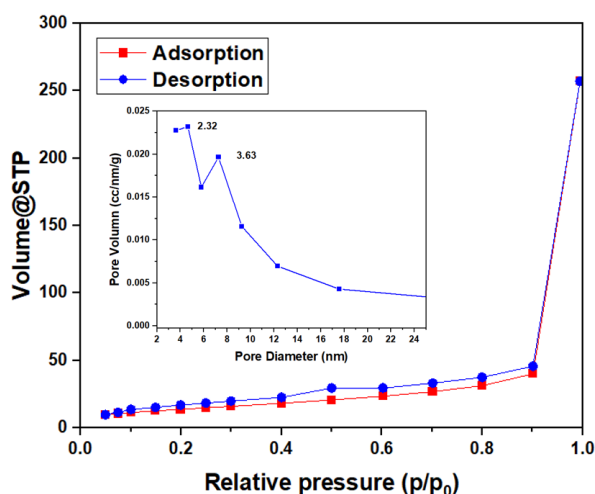

**Fig. S15** N<sub>2</sub> adsorption-desorption isotherm and pore-size distribution plot (BJH method) of Co-Phen/800 catalyst.

## 9.6. Characterization of Co-Phen/800 catalyst

The PXRD pattern of Co-Phen/800 did not show any peaks assignable to cobalt metal or its compounds, only the peaks corresponded to (002) and (100) graphitic planes were observed, which indicated the Co species in the sample were either highly dispersed or amorphous (Fig. S16a). Later, HRTEM was employed to examine the dispersed Co-species. However, no cobalt-containing nanoparticles were observed, only graphitic layers were revealed which was in accordance with the PXRD pattern (Fig. S16b). This implied that the cobalt species must be highly dispersed as tiny clusters or single atoms that are undetectable or invisible by PXRD, TEM techniques.

Later, in order to get information at atomic scale, sub-Ångström-resolution HAADF-STEM technique was used to examine the Co-Phen/800. Interestingly, a large number of uniformly dispersed Co single atoms were observed (Fig. S16c,d). Additionally, the EDX analysis also demonstrated homogeneous distribution of the Co-SACs on the carbon support (Fig. S16e-i).

Next, XPS analysis was performed to gain the information about the electronic states of the elements present in the surface. The high resolution deconvoluted Co2p<sub>3/2</sub> spectra revealed Co(II)-CoN<sub>x</sub> (781.6 eV) was present as the major Co-species (Fig. S16j). Later the oxidation state of cobalt as Co(II) was further confirmed by XANES analysis where the adsorption K-edges of Co-Phen/800 were more-or-less overlaid the cobalt phthalocyanine (CoPc) and the CoO edge (Fig. S13). This indicated the Co(II) oxidation state of Co-Phen/800. In the N<sub>1s</sub> XPS spectra, two peaks were observed at 399.02 eV and 400.7 eV, the lower energy peak

corresponded to pyridinic nitrogen whereas the higher energy peak represented the overlap of CoNx and pyrrolic nitrogen (Fig. S16k).

The FT-EXAFS spectra for Co-Phen/800 (Fig. S13b) presented only one prominent peak at 1.43 Å, which could be ascribed to the Co–Nx coordination of Co at the first shell. Note that the Co–O coordination was located at slightly higher R values in the CoO (1.55 Å) and Co<sub>3</sub>O<sub>4</sub> (1.6 Å) samples. Besides, it was also found, the FT-EXAFS curve of Co-Phen/800 indicated similar characteristic peaks to those of CoPc but different peak-distributions to those of Co foil, CoO, and Co<sub>3</sub>O<sub>4</sub>. This result suggested that the coordination environment of Co-Phen/800 was closer to that of CoPc, where the Co atoms are coordinated with nitrogen to form Co–Nx bonds. Meanwhile, no obvious Co–Co peak, typically at 2.1 Å, was found in Co-Phen/800, which ruled out the possibility of aggregated Co nanoparticles, consistent with the HAADF-STEM observation. Moreover, the EXAFS fitting was performed to extract the quantitative structural parameters of Co sites in Co-Phen/800. The EXAFS R-space fitting curve of Co-Phen/800 (Fig. S13c) and the fitted parameters summarized in Table S7 clearly suggested that the atomically dispersed cobalt sites existed in the Co–N<sub>4</sub> configuration with a bond distance of 1.89 Å. The WT-EXAFS of Co-Phen/800 in Fig. S13g exhibited a maximum peak at around 2.3 Å<sup>-1</sup>, which was similar to that of CoPc (Fig. S13f) and could be assigned to the Co–N coordination. No intensity maximum corresponding to Co–Co coordination was observed, in sharp contrast with those of Co foil, CoO, and Co<sub>3</sub>O<sub>4</sub>, demonstrating Co aggregation were not present in Co-Phen/800.

The textural properties of Co-Phen/800 catalysts were investigated through N<sub>2</sub>-adsorption desorption studies. The Co-Phen/800 presented a type-II isotherm. BET surface area and pore volume of the catalyst were found to be 64.96 m<sup>2</sup>/g, 0.398 cc/g, respectively. Further, the pore size distribution was derived using BJH method, and two peaks were observed at 2.32 nm and 3.63 nm, which signified the meso-porous nature of the catalyst (Fig. S15).

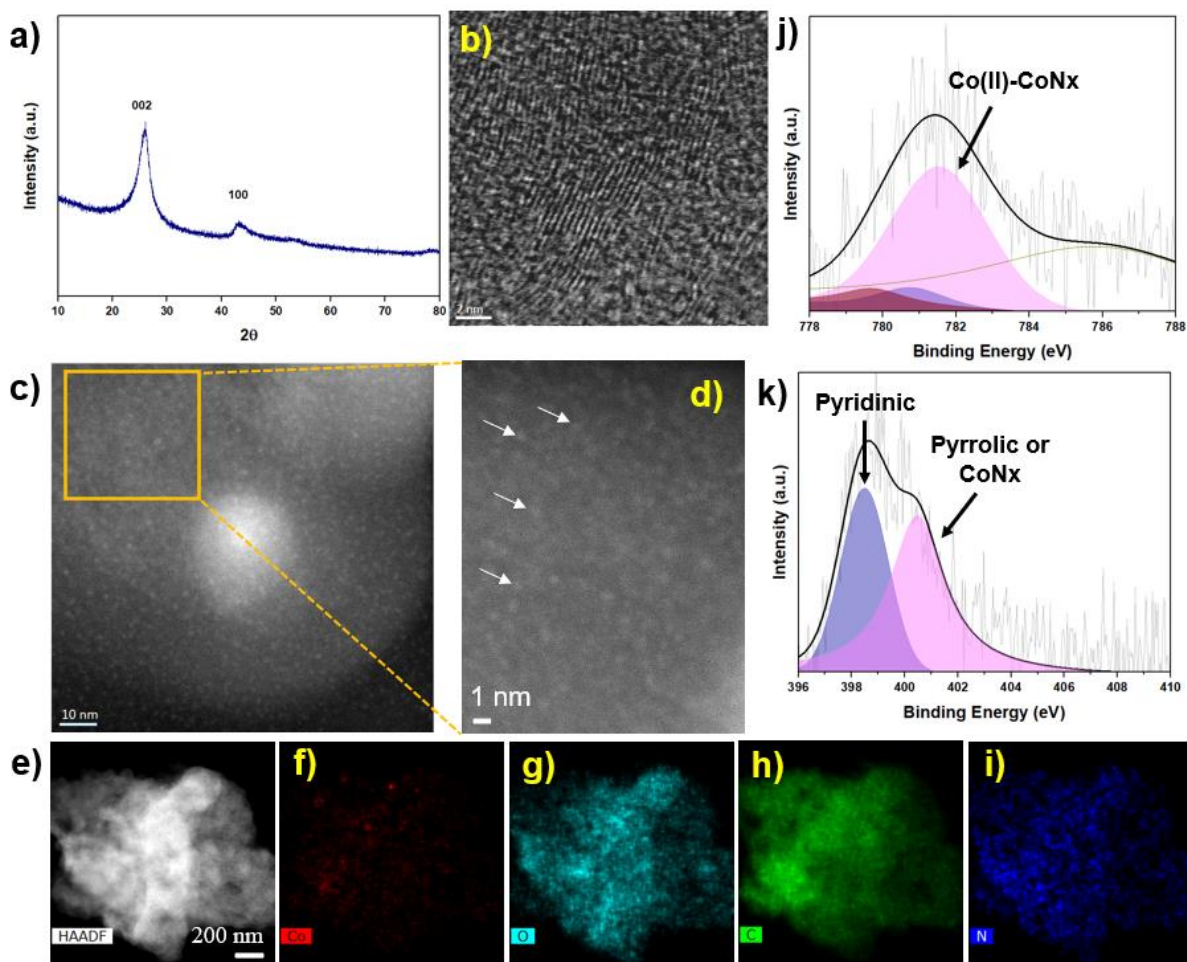

**Fig. S16** a) PXRD pattern; b) HRTEM; c) and d) AC-HAADF image; e-i) EDX analysis; j) High-resolution deconvoluted  $\text{Co}2p_{3/2}$ , k)  $\text{N}1s$  XPS spectra of Co-Phen/800.

## 10. Spectral data for the amines

### Aniline (1b):<sup>6</sup>

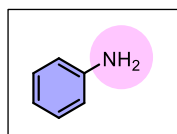

From **1a**, 75.5 mg (81%) (EtOH), 76.4 mg (82%) (MeOH); From **25a**, 41.9 mg (90%) (EtOH), 38.6 mg (83%) (MeOH); From **26a**, 42.4 mg (91%) (EtOH), 38.2 mg (82%) (MeOH); From **27a**, 43.7 mg (94%) (EtOH), 42.8 mg (92%) (MeOH); From **28a**, 7.9 mg (17%); 22.3 mg (48%) (EtOH), 7.0 mg (15%); 24.7 mg (53%) (MeOH); From **29a**, 8.4 mg (18%); 24.2 mg (52%) (EtOH), 10.24 mg (22%); 20.9 mg (45%) (MeOH); From **30a**, 76.4 mg (82%) (EtOH), 70.8 mg (76%) (MeOH); From **31a**, 26.5 mg (57%); 36.3 mg (78%) (EtOH), 24.2 mg (52%) (MeOH); 33.5 mg (72%); From **36a**, 12.6 mg (27%); 26.5 mg (57%) (EtOH), 11.2 mg (24%); 20.5 mg (44%) (MeOH); isolated yield; yellowish liquid.  $^1\text{H NMR}$  ( $\text{CDCl}_3$ , 400 MHz)  $\delta$  = 7.15 (t,  $J_{\text{H,H}}$  = 7.8 Hz, 2H), 6.76 (t,  $J_{\text{H,H}}$  = 7.4 Hz, 1H), 6.68 (d,  $J_{\text{H,H}}$  = 8.0 Hz, 2H), 3.51 (s, 2H).  $^{13}\text{C}$   $\{^1\text{H}\}$  NMR ( $\text{CDCl}_3$ , 100 MHz)  $\delta$  = 146.4, 129.3, 118.5, 115.1.

#### **p-toluidine (2b):<sup>6</sup>**

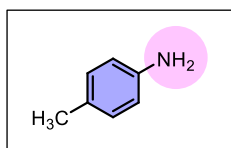

From **2a**, 99.6 mg (93%) (EtOH), 94.3 mg (88%) (MeOH); From **25a**, 48.2 mg (90%) (EtOH), 44.4 mg (83%) (MeOH); From **27a**, 50.3 mg (94%) (EtOH), 49.3 mg (92%) (MeOH); From **33a**, 11.25 mg (21%); 27.8 mg (52%) (EtOH), 14.5 mg (27%); 26.8 mg (50%) (MeOH); isolated yield; yellow orange solid. **<sup>1</sup>H NMR** (CDCl<sub>3</sub>, 400 MHz)  $\delta$  = 6.97 (d,  $J_{H,H}$  = 7.9 Hz, 2H), 6.61 (d,  $J_{H,H}$  = 8.0 Hz, 2H), 3.46 (s, 2H), 2.25 (s, 3H). **<sup>13</sup>C {<sup>1</sup>H} NMR** (CDCl<sub>3</sub>, 100 MHz)  $\delta$  = 143.9, 129.8, 127.8, 115.3, 20.5.

#### **4-methoxyaniline (3b):<sup>7</sup>**

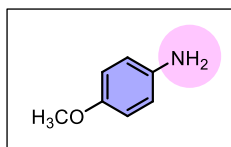

From **3a**, 115.7 mg (94%) (EtOH), 107.2 mg (87%) (MeOH); From **26a**, 56.0 mg (91%) (EtOH), 50.5 mg (82%) (MeOH); From **27a**, 57.86 mg (94%) (EtOH), 56.6 mg (92%) (MeOH); From **35a**, 48.0 mg (78%) (EtOH), 50.5 mg (82%) (MeOH); isolated yield; yellowish solid. **<sup>1</sup>H NMR** (CDCl<sub>3</sub>, 400 MHz)  $\delta$  = 6.73 (d,  $J_{H,H}$  = 9.0 Hz, 2H), 6.63 (d,  $J_{H,H}$  = 9.1 Hz, 2H), 3.73 (s, 3H), 3.38 (s, 2H). **<sup>13</sup>C {<sup>1</sup>H} NMR** (CDCl<sub>3</sub>, 100 MHz)  $\delta$  = 152.9, 140.0, 116.5, 114.9, 55.8.

#### **4-(tert-butyl)aniline (4b):<sup>8</sup>**

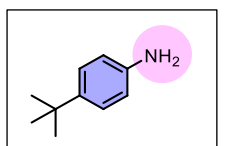

From **4a**, 129.8 mg (87%) (EtOH), 134.3 mg (90%) (MeOH); From **32a**, 28.4 mg (38%); 51.5 mg (69%) (EtOH), 23.9 mg (32%); 50 mg (67%) (MeOH); isolated yield; yellowish oil. **<sup>1</sup>H NMR** (CDCl<sub>3</sub>, 400 MHz)  $\delta$  = 7.19 (d,  $J_{H,H}$  = 8.6 Hz, 2H), 6.65 (d,  $J_{H,H}$  = 8.6 Hz, 2H), 3.50 (s, 2H), 1.29 (s, 9H). **<sup>13</sup>C {<sup>1</sup>H} NMR** (CDCl<sub>3</sub>, 100 MHz)  $\delta$  = 143.8, 141.5, 126.1, 115.0, 34.0, 31.6.

#### **N,N-dimethylbenzene-1,4-diamine (5b):<sup>9</sup>**

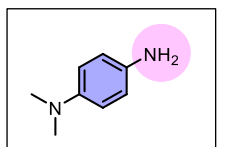

From **5a**, 128.0 mg (93%) (EtOH), 123.9 mg (91%) (MeOH); isolated yield; reddish solid. **<sup>1</sup>H NMR** (CDCl<sub>3</sub>, 400 MHz)  $\delta$  = 6.70 - 6.62 (m, 4H), 3.33 (s, 2H), 2.81 (s, 6H). **<sup>13</sup>C {<sup>1</sup>H} NMR** (CDCl<sub>3</sub>, 100 MHz)  $\delta$  = 145.0, 137.9, 116.7, 115.7, 42.2.

#### **4-bromoaniline (6b):<sup>10</sup>**

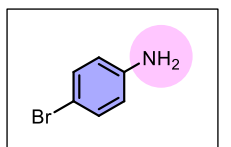

From **6a**, 77.4 mg (45%); 130 mg (76%) (EtOH), 60.2 mg (35%); 127.3 mg (74%) (MeOH); From **28a**, 14.6 mg (17%); 41.3 mg (48%) (EtOH), 12.9 mg (15%); 45.6 mg (53%) (MeOH); From **33a**, 18.1 mg (21%); 44.8 mg (52%) (EtOH), 20.7 mg (27%); 42.8 mg (50%) (MeOH); isolated yield; yellowish solid. **<sup>1</sup>H NMR** (CDCl<sub>3</sub>, 400 MHz)  $\delta$  = 7.22 (d,  $J_{H,H}$  = 8.9 Hz, 2H), 6.55 (d,  $J_{H,H}$  = 8.6 Hz, 2H), 3.63 (s, 2H). **<sup>13</sup>C {<sup>1</sup>H} NMR** (CDCl<sub>3</sub>, 100 MHz)  $\delta$  = 145.5, 132.1, 116.8, 110.3.

#### **4-fluoroaniline (7b):<sup>6</sup>**

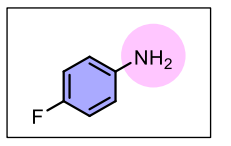

From **7a**, 42.2 mg (38%); 74.4 mg (67%) (EtOH), 36.7 mg (33%); 63.33 mg (57%) (MeOH); isolated yield; yellowish oil. **<sup>1</sup>H NMR** (CDCl<sub>3</sub>, 400 MHz)  $\delta$  = 6.86 (t,  $J_{H,H}$  = 8.6 Hz, 2H), 6.63 - 6.54 (m, 2H), 3.53 (s, 2H). **<sup>13</sup>C {<sup>1</sup>H} NMR** (CDCl<sub>3</sub>, 100 MHz)  $\delta$  = 157.63, 155.29, 142.76, 116.19 ( $J_{C-F}$  = 8.0 Hz), 115.76 ( $J_{C-F}$  = 22 Hz).

#### 4-(trifluoromethyl)aniline (8b):<sup>6</sup>

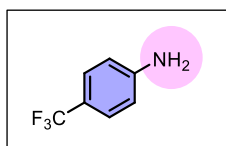

From **8a**, 29.0 mg (18%); 62.8 mg (39%) (EtOH), 22.5 mg (14%); 54.8 mg (34%) (MeOH); From **32a**, 30.6 mg (38%); 55.6 mg (69%) (EtOH), 25.6 mg (32%); 54.0 mg (67%) (MeOH); From **36a**, 21.7 mg (27%); 46.9 mg (57%) (EtOH), 19.5 mg (24%); 35.4 mg (44%) (MeOH); isolated yield; yellow oil. <sup>1</sup>H NMR (CDCl<sub>3</sub>, 400 MHz) δ = 7.38 (d, *J*<sub>H,H</sub> = 8.3 Hz, 2H), 6.67 (d, *J*<sub>H,H</sub> = 8.3 Hz, 2H), 3.92 (s, 2H). <sup>13</sup>C{<sup>1</sup>H} NMR (CDCl<sub>3</sub>, 100 MHz) δ = 149.4, 126.8 (d, *J*<sub>C-F</sub> = 3 Hz), 126.2, 124.0, 120.2 (q, *J*<sub>C-F</sub> = 33 Hz), 114.24.

#### m-toluidine (9b):<sup>11</sup>

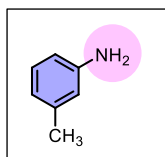

From **9a**, 93.2 mg (87%) (EtOH), 98.6 mg (92%) (MeOH); isolated yield; yellowish oil. <sup>1</sup>H NMR (CDCl<sub>3</sub>, 400 MHz) δ = 7.07 (t, *J*<sub>H,H</sub> = 7.4 Hz, 1H), 6.62 (d, *J*<sub>H,H</sub> = 7.5 Hz, 1H), 6.52 (d, *J*<sub>H,H</sub> = 8.8 Hz, 2H), 3.57 (s, 2H), 2.30 (s, 3H). <sup>13</sup>C{<sup>1</sup>H} NMR (CDCl<sub>3</sub>, 100 MHz) δ = 146.5, 139.2, 129.3, 119.6, 116.1, 112.4, 21.5.

#### 3-chloroaniline (10b):<sup>7</sup>

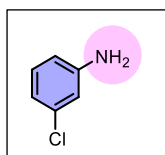

From **10a**, 84.2 mg (66%) (EtOH), 82.9 mg (65%) (MeOH); isolated yield; yellowish solid. <sup>1</sup>H NMR (CDCl<sub>3</sub>, 400 MHz) δ = 7.06 (t, *J*<sub>H,H</sub> = 8.0 Hz, 1H), 6.74 (d, *J*<sub>H,H</sub> = 7.9 Hz, 1H), 6.65 (d, *J*<sub>H,H</sub> = 3.0 Hz, 1H), 6.52 (dd, *J*<sub>H,H</sub> = 8.0, 2.3 Hz, 1H), 3.72 (s, 2H). <sup>13</sup>C{<sup>1</sup>H} NMR (CDCl<sub>3</sub>, 100 MHz) δ = 147.69, 147.66, 134.64, 130.30, 130.27, 130.23, 118.25, 114.80, 113.20, 113.17, 113.12.

#### 2-methoxyaniline (11b):<sup>11</sup>

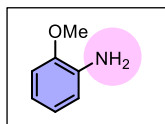

From **11a**, 64.1 mg (52%); 92.4 mg (75%) (EtOH), 55.4 mg (45%); 82.5 mg (67%) (MeOH); isolated yield; colourless liquid. <sup>1</sup>H NMR (CDCl<sub>3</sub>, 400 MHz) δ = 6.83 - 6.78 (m, 2H), 6.77 - 6.71 (m, 2H), 3.85 (s, 3H), 3.71 (s, 2H). <sup>13</sup>C{<sup>1</sup>H} NMR (CDCl<sub>3</sub>, 100 MHz) δ = 147.37, 136.11, 121.09, 118.53, 115.09, 110.47, 55.43.

#### 3,5-dimethylaniline (12b):<sup>11</sup>

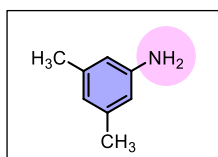

From **12a**, 109 mg (90%) (EtOH), 106.7 mg (88%) (MeOH); isolated yield; yellowish oil. <sup>1</sup>H NMR (CDCl<sub>3</sub>, 500 MHz) δ = 6.44 (s, 1H), 6.34 (s, 2H), 3.55 (s, 2H), 2.25 (s, 6H). <sup>13</sup>C{<sup>1</sup>H} NMR (CDCl<sub>3</sub>, 125 MHz) δ = 146.38, 120.50, 113.11, 21.32.

#### 2,4,6-trimethylaniline (13b):<sup>12</sup>

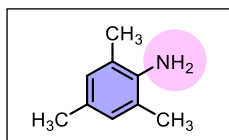

From **13a**, 60.9 mg (45%); 81 mg (60%) (EtOH), 69.1 mg (51%), 87.9 mg (65%) (MeOH); isolated yield; yellow liquid. <sup>1</sup>H NMR (CDCl<sub>3</sub>, 400 MHz) δ = 6.80 (s, 2H), 3.46 (s, 2H), 2.24 (s, 3H), 2.19 (s, 6H). <sup>13</sup>C{<sup>1</sup>H} NMR (CDCl<sub>3</sub>, 100 MHz) δ = 140.2, 128.9, 127.1, 121.9, 20.4, 17.6.

### 2,4-dimethoxyaniline (14b):<sup>12</sup>

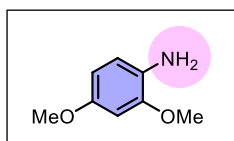

From **14a**, 79.65 mg (52%); 119.4 mg (78%) (EtOH), 72.1 mg (47%); 105.7 mg (69%) (MeOH); isolated yield; yellow liquid. **<sup>1</sup>H NMR** (CDCl<sub>3</sub>, 400 MHz)  $\delta$  = 6.63 (d,  $J_{H,H}$  = 8.1 Hz, 1H), 6.44 (d,  $J_{H,H}$  = 2.6 Hz, 1H), 6.33 (dd,  $J_{H,H}$  = 8.3, 2.7 Hz, 1H), 3.81 (s, 3H), 3.73 (s, 3H), 3.50 (s, 2H). **<sup>13</sup>C{<sup>1</sup>H} NMR** (CDCl<sub>3</sub>, 100 MHz)  $\delta$  = 153.17, 148.39, 129.77, 115.26, 104.19, 99.39, 55.80, 55.51.

### 1-(4-aminophenyl)ethan-1-ol (15b):<sup>13</sup>

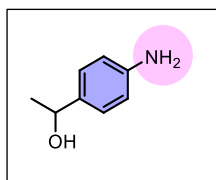

From **15a**, 56.24 mg (41%); 93.28 mg (68%) (EtOH), 59.0 mg (43%); 89.2 mg (65%) (MeOH); From **34a**, 20.5 mg (30%); 44.6 mg (65%) (EtOH), 18.5 mg (27%); 42.5 mg (62%) (MeOH); yellowish liquid. **<sup>1</sup>H NMR** (DMSO-*d*<sub>6</sub>, 400 MHz)  $\delta$  = 6.95 (d,  $J_{H,H}$  = 7.8 Hz, 2H), 6.47 (d,  $J_{H,H}$  = 8.3 Hz, 2H), 4.81 (s, 2H), 4.54 - 4.48 (m, 1H), 1.22 (d,  $J_{H,H}$  = 6.7 Hz, 3H). **<sup>13</sup>C{<sup>1</sup>H} NMR** (CDCl<sub>3</sub>, 100 MHz)  $\delta$  = 147.31, 134.74, 126.22, 113.68, 68.16, 25.93.

### 4-aminobenzoic acid (16b):<sup>6</sup>

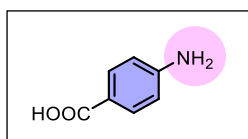

From **16a**, 115.2 mg (84%) (EtOH), 97.4 mg (71%) (MeOH); isolated yield; white solid. **<sup>1</sup>H NMR** (DMSO-*d*<sub>6</sub>, 400 MHz)  $\delta$  = 7.55 (d,  $J_{H,H}$  = 8.4 Hz, 2H), 6.49 (d,  $J_{H,H}$  = 8.4 Hz, 2H), 5.79 (s, 2H). **<sup>13</sup>C{<sup>1</sup>H} NMR** (DMSO-*d*<sub>6</sub>, 100 MHz)  $\delta$  = 167.7, 153.2, 131.3, 117.0, 112.7.

### ethyl 4-aminobenzoate (17b):<sup>11</sup>

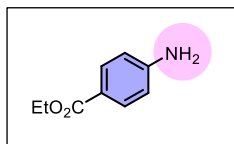

From **17a**, 130.5 mg (79%) (EtOH); isolated yield; yellowish solid. **<sup>1</sup>H NMR** (CDCl<sub>3</sub>, 400 MHz)  $\delta$  = 7.84 (d,  $J_{H,H}$  = 8.2 Hz, 1H), 6.62 (d,  $J_{H,H}$  = 8.6 Hz, 1H), 4.30 (q,  $J_{H,H}$  = 6.9 Hz, 1H), 4.01 (s, 1H), 1.34 (t,  $J_{H,H}$  = 7.0 Hz, 2H). **<sup>13</sup>C{<sup>1</sup>H} NMR** (CDCl<sub>3</sub>, 100 MHz)  $\delta$  = 166.8, 150.8, 131.6, 120.3, 113.9, 60.4, 14.5.

### 3-ethylaniline (18b):<sup>12</sup>

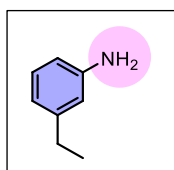

From **18a**, 101.8 mg (84%) (EtOH), 100.6 mg (83%) (MeOH); isolated yield; yellow liquid. **<sup>1</sup>H NMR** (CDCl<sub>3</sub>, 400 MHz)  $\delta$  = 7.09 (t,  $J_{H,H}$  = 7.7 Hz, 1H), 6.63 (d,  $J_{H,H}$  = 7.3 Hz, 1H), 6.59 - 6.50 (m, 2H), 3.60 (s, 2H), 2.58 (q,  $J_{H,H}$  = 7.5 Hz, 2H), 1.23 (t,  $J_{H,H}$  = 7.44 Hz, 3H). **<sup>13</sup>C{<sup>1</sup>H} NMR** (CDCl<sub>3</sub>, 100 MHz)  $\delta$  = 146.52, 145.68, 129.34, 118.38, 114.86, 112.65, 28.96, 15.62.

### 3-aminobenzonitrile (19b):<sup>6</sup>

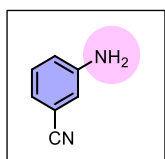

From **19a**, 63.8 mg (54%); 85 mg (72%) (EtOH), 47.2 mg (40%); 82.7 mg (71%) (MeOH); isolated yield; yellow-orange solid. **<sup>1</sup>H NMR** (CDCl<sub>3</sub>, 400 MHz)  $\delta$  = 7.17 (t,  $J_{H,H}$  = 7.9 Hz, 1H), 6.96 (d,  $J_{H,H}$  = 7.9 Hz, 1H), 6.87 - 6.82 (m, 2H), 3.92 (s, 2H). **<sup>13</sup>C{<sup>1</sup>H} NMR** (CDCl<sub>3</sub>, 100 MHz)  $\delta$  = 147.2, 130.2, 121.9, 119.4, 119.3, 117.5, 112.8.



**pyridin-4-amine (20b):**<sup>14</sup>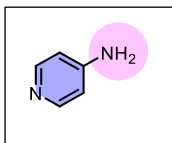

From **20a**, 75.3 mg (80%) (EtOH), 67.8 mg (72%) (MeOH); isolated yield; yellowish solid. <sup>1</sup>H NMR (CDCl<sub>3</sub>, 400 MHz) δ = 8.16 (d, *J*<sub>H,H</sub> = 5.4 Hz, 2H), 6.48 (d, *J*<sub>H,H</sub> = 5.5 Hz, 2H), 4.23 (s, 2H). <sup>13</sup>C{<sup>1</sup>H} NMR (CDCl<sub>3</sub>, 100 MHz) δ = 152.8, 150.2, 109.7.

**1H-indol-5-amine (21b):**<sup>15</sup>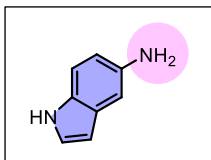

From **21a**, 103 mg (78%) (EtOH), 92.5 mg (70%) (MeOH); isolated yield; yellowish solid. <sup>1</sup>H NMR (CDCl<sub>3</sub>, 400 MHz) δ = 7.94 (s, 1H), 7.18 (d, *J*<sub>H,H</sub> = 8.5 Hz, 1H), 7.11 (t, *J*<sub>H,H</sub> = 2.8 Hz, 1H), 6.93 (d, *J*<sub>H,H</sub> = 2.3 Hz, 1H), 6.65 (dd, *J*<sub>H,H</sub> = 8.3, 2.1 Hz, 1H), 6.36 (t, *J*<sub>H,H</sub> = 2.5 Hz, 1H), 3.47 (s, 2H). <sup>13</sup>C{<sup>1</sup>H} NMR (CDCl<sub>3</sub>, 100 MHz) δ = 139.64,

130.76, 128.89, 124.78, 113.06, 111.59, 105.64, 101.68.

**benzo[d]thiazol-2-amine (22b):**<sup>16</sup>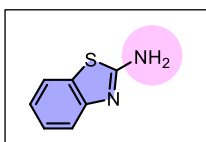

From **22a**, 37.5 mg (25%); 87.1 mg (58%) (EtOH), 27 mg (18%); 76.6 mg (51%) (MeOH); isolated yield; yellowish solid. <sup>1</sup>H NMR (CDCl<sub>3</sub>, 400 MHz) δ = 7.57 (d, *J*<sub>H,H</sub> = 7.9 Hz, 1H), 7.52 (d, *J*<sub>H,H</sub> = 8.0 Hz, 1H), 7.29 (t, *J*<sub>H,H</sub> = 7.7 Hz, 1H), 7.11 (t, *J*<sub>H,H</sub> = 7.6 Hz, 1H), 5.58 (s, 2H). <sup>13</sup>C{<sup>1</sup>H} NMR (CDCl<sub>3</sub>, 100 MHz) δ = 166.52, 151.99,

131.43, 125.99, 122.23, 120.95, 118.99.

**Cyclohexanamine (23b):**<sup>17</sup>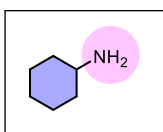

From **23a**, 54.6 mg (55%); 78.4 mg (79%) (EtOH), 40.6 mg (41 %) (MeOH); From **35a**, 38.6 mg (78%) (EtOH), 40.6 mg (82%) (MeOH); isolated yield; yellowish liquid. <sup>1</sup>H NMR (CDCl<sub>3</sub>, 400 MHz) δ = 2.55 (tt, *J*<sub>H,H</sub> = 10.8, 3.9 Hz, 1H), 1.74 (dt, *J*<sub>H,H</sub> = 12.4, 3.8 Hz, 2H), 1.64 (dq, *J*<sub>H,H</sub> = 11.5, 3.8 Hz, 2H), 1.58 - 1.47 (m, 1H), 1.29 - 1.12 (m, 4H), 1.12 - 1.04 (m, 1H), 1.04 - 0.89 (m, 2H). <sup>13</sup>C{<sup>1</sup>H} NMR (CDCl<sub>3</sub>, 100 MHz) δ = 50.5, 36.9, 25.7, 25.2.

**Adamantan-1-amine (24b):**<sup>18</sup>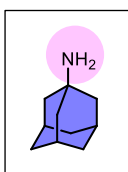

From **24a**, 90.8 mg (60%); 124 mg (82%) (EtOH), 76.6 mg (52%); 113.4 mg (75%) (MeOH); isolated yield; white solid. <sup>1</sup>H NMR (CDCl<sub>3</sub>, 400 MHz) δ = 2.03 (s, 2H), 1.78 - 1.41 (m, 15H). <sup>13</sup>C{<sup>1</sup>H} NMR (CDCl<sub>3</sub>, 100 MHz) δ = 47.5, 46.2, 36.3, 29.9.

**4-aminobenzonitrile (29b2):**<sup>6</sup>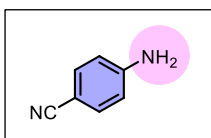

From **29a**, 10.6 mg (18%); 30.7 mg (52%) (EtOH), 13.0 mg (22%); 26.6 mg (45%) (MeOH); isolated yield; yellow solid. <sup>1</sup>H NMR (CDCl<sub>3</sub>, 400 MHz) δ = 7.39 (d, *J*<sub>H,H</sub> = 8.5 Hz, 2H), 6.62 (d, *J*<sub>H,H</sub> = 8.6 Hz, 2H), 4.12 (s, 2H). <sup>13</sup>C{<sup>1</sup>H} NMR (CDCl<sub>3</sub>, 100 MHz) δ = 150.4, 133.9, 120.2, 114.5, 100.4.

### benzene-1,4-diamine (30b2):<sup>8</sup>

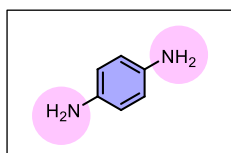

From **30a**, 44.3 mg (82%) (EtOH), 41.1 mg (76%) (MeOH); From **31a**, 30.8 mg (57%); 42.2 mg (78%) (EtOH), 28.2 mg (52%); 39.0 mg (72%); (MeOH); From **34a**, 22.6 mg (42%); 41.6 mg (77%) (EtOH), 20.5 mg (38%); 42.7 mg (79%) (MeOH); isolated yield; white solid. <sup>1</sup>H NMR (CDCl<sub>3</sub>, 400 MHz) δ = 8.16 (d, *J*<sub>H,H</sub> = 5.4 Hz, 2H), 6.48 (d, *J*<sub>H,H</sub> = 5.5 Hz, 2H), 4.23 (s, 2H). <sup>13</sup>C{<sup>1</sup>H} NMR (CDCl<sub>3</sub>, 100 MHz) δ = 152.8, 150.2, 149.9, 109.7.

### 11. Computational details:

Possible geometries on the designed reaction pathways were optimized using Gaussian 09 software<sup>19</sup> and structure were presented using CYLview20.<sup>20</sup> Construction of trial geometries, monitoring the progress of calculations and visualization of the final output were done by several graphical user interface softwares like Gauss View, Molden etc. We have chosen hybrid density functional M06-2X as a method for performing optimization of structures. 6-31G (d, p)<sup>21</sup> basis set was employed for all non-metal atoms and the LANL2DZ basis set<sup>22</sup> was employed for cobalt. The optimized geometries are further refined with single-point energy calculations at the M06-2X/6-311+G(2df, p)<sup>23</sup> level of theory. To find out the geometries of several transition structures on the potential energy surface (PES) of the reaction pathway, relaxed scan method was used. Each structure was characterized as corresponding to a minimum or a saddle point on the energy hyper surface by means of frequency analysis. A transition structure (TS) possesses only a single imaginary frequency while the structure at minimum contains no imaginary frequency at all. Further confirmation of the TS was done by following the intrinsic reaction coordinate (IRC) pathway. All the relative energies on the reaction path were calculated with respect to the energy sum of the free reactant and catalyst. Solvent effect was approximated by introducing a polarizable continuum model (PCM).<sup>24</sup> We used the standard parameters for the solvent Ethanol at 403.15 K temperature.

### 11.1. The reason for considering **A** as the active site:

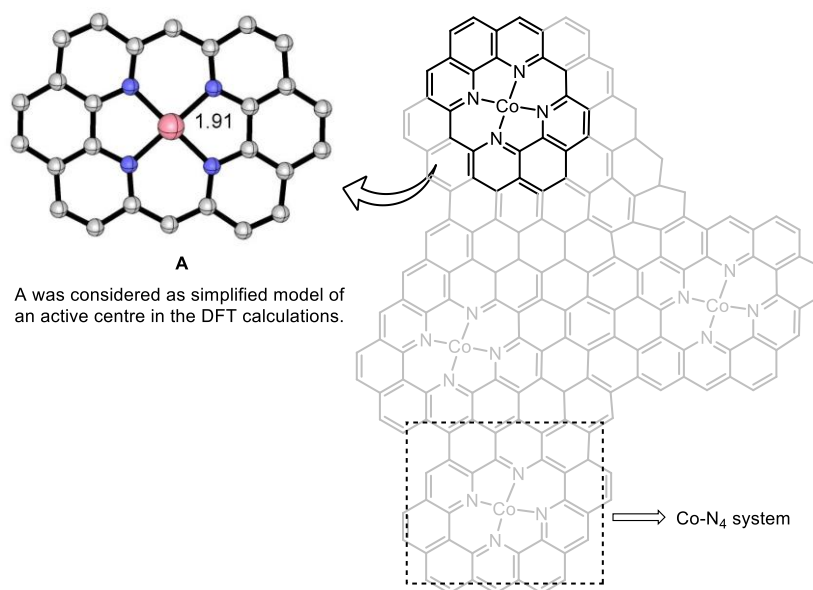

**Fig. S17** The reason for considering **A** as the active site.

**Table S8.** Comparison of FT-EXAFS fitting data and theoretical model

|                   | CN  | R (Å) |
|-------------------|-----|-------|
| FT-EXAFS fitting  | 3.6 | 1.89  |
| Theoretical model | 4   | 1.91  |

The FT-EXAFS and WT-EXAFS clearly suggested in this catalyst only the Co-N bond is present in the active site. Further, the fitting study demonstrated, CN= ~4 (3.6) and R = 1.89 Å, which suggested the existence of **Co-N<sub>4</sub>** unit. On the other hand, in the theoretical model, cobalt is bound with 4 nitrogens with the length of 1.91 Å. Based on these structural information **A** is considered as the model active site.

## 11.2. Kinetic Isotope Study:

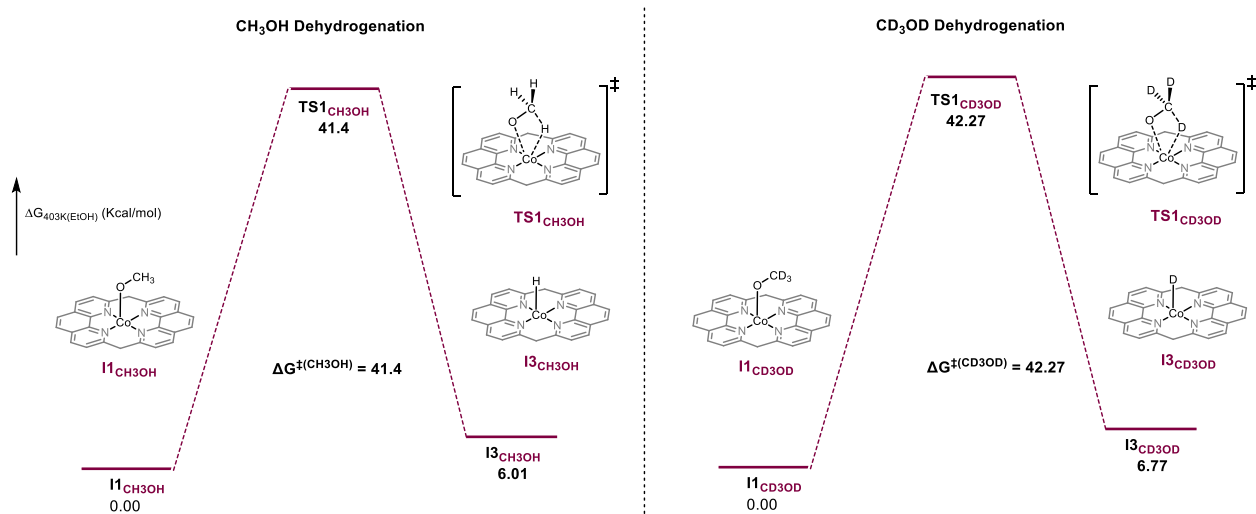

Fig. S18 KIE study on methanol dehydrogenation.

$$\begin{aligned}
 k_H/k_D &= A \text{Exp} (\Delta G^\ddagger(\text{CD}_3\text{OD})/RT) / A \text{Exp} (\Delta G^\ddagger(\text{CH}_3\text{OH})/RT) \\
 &= \text{Exp} (\Delta G^\ddagger(\text{CD}_3\text{OD}) - \Delta G^\ddagger(\text{CH}_3\text{OH})/RT) \\
 &= \text{Exp} (42.27 - 41.4 / 1.9872036 \times 10^{-3} \times 403.15) \\
 &= 2.96
 \end{aligned}$$

$$k_H/k_D = 2.3 \text{ (Experimental)}$$

Theoretical found  $k_H/k_D = 2.96$ , which is in good agreement with the experimentally determined  $k_H/k_D = 2.3$ .

## 11.3. Cartesian coordinates and statistical thermodynamic analysis data:

| St.Pt.                | General Structure | Ball & Stick model |          |             |           |           |
|-----------------------|-------------------|--------------------|----------|-------------|-----------|-----------|
| $\text{CO}_3^{2-}$    |                   |                    |          |             |           |           |
| Cartesian co-ordinate |                   |                    |          | Frequencies |           |           |
| Atoms                 | X                 | Y                  | Z        | 683.1451    | 684.7635  | 908.8954  |
|                       |                   |                    |          | 1064.3312   | 1519.4950 | 1520.4089 |
| C                     | 0.00000           | 0.00000            | 0.00010  |             |           |           |
| O                     | 0.00000           | 0.00000            | 1.30468  |             |           |           |
| O                     | 0.00000           | 1.12956            | -0.65238 |             |           |           |
| O                     | 0.00000           | -1.12956           | -0.65238 |             |           |           |

### Statistical Thermodynamic Analysis

Temperature=403.15 K

Zero-point correction= 0.014537

Internal Energy (E)= -263.47407359

Gibbs Free Energy (G)=-263.51424659

Pressure=1 atm

Electronic Energy = -263.493375590

Enthalpy (H)= -263.47279659

Gibbs Free Energy of Solvation=-264.0697765

| St.Pt.                                                                                                                                                    | General Structure                                                                 | Ball & Stick model                                                                                                                                       |
|-----------------------------------------------------------------------------------------------------------------------------------------------------------|-----------------------------------------------------------------------------------|----------------------------------------------------------------------------------------------------------------------------------------------------------|
| <b>CO<sub>3</sub>H<sup>-</sup></b>                                                                                                                        | 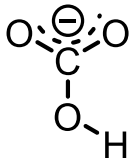 |                                                                       |
| <b>Cartesian co-ordinate</b>                                                                                                                              |                                                                                   | <b>Frequencies</b>                                                                                                                                       |
| -----                                                                                                                                                     |                                                                                   |                                                                                                                                                          |
| <b>Atoms</b>                                                                                                                                              | <b>X</b>                                                                          | <b>Y</b>                                                                                                                                                 |
| -----                                                                                                                                                     |                                                                                   |                                                                                                                                                          |
| C                                                                                                                                                         | -0.15094                                                                          | 0.07437                                                                                                                                                  |
| O                                                                                                                                                         | -1.25093                                                                          | -0.48684                                                                                                                                                 |
| O                                                                                                                                                         | 0.18499                                                                           | 1.27828                                                                                                                                                  |
| O                                                                                                                                                         | 0.96662                                                                           | -0.82251                                                                                                                                                 |
| H                                                                                                                                                         | 1.70025                                                                           | -0.19763                                                                                                                                                 |
|                                                                                                                                                           |                                                                                   | -0.00000                                                                                                                                                 |
|                                                                                                                                                           |                                                                                   | 0.00000                                                                                                                                                  |
|                                                                                                                                                           |                                                                                   | -0.00000                                                                                                                                                 |
|                                                                                                                                                           |                                                                                   | -0.00000                                                                                                                                                 |
|                                                                                                                                                           |                                                                                   | 0.00003                                                                                                                                                  |
|                                                                                                                                                           |                                                                                   | 555.9445                                                                                                                                                 |
|                                                                                                                                                           |                                                                                   | 565.6904                                                                                                                                                 |
|                                                                                                                                                           |                                                                                   | 658.0212                                                                                                                                                 |
|                                                                                                                                                           |                                                                                   | 839.1334                                                                                                                                                 |
|                                                                                                                                                           |                                                                                   | 939.8310                                                                                                                                                 |
|                                                                                                                                                           |                                                                                   | 1228.8075                                                                                                                                                |
|                                                                                                                                                           |                                                                                   | 1391.8303                                                                                                                                                |
|                                                                                                                                                           |                                                                                   | 1892.5632                                                                                                                                                |
|                                                                                                                                                           |                                                                                   | 3885.3474                                                                                                                                                |
| <b>Statistical Thermodynamic Analysis</b>                                                                                                                 |                                                                                   |                                                                                                                                                          |
| <p>Temperature=403.15 K</p> <p>Zero-point correction= 0.027240</p> <p>Internal Energy (E)= -264.298735377</p> <p>Gibbs Free Energy (G)=-264.340864377</p> |                                                                                   | <p>Pressure=1 atm</p> <p>Electronic Energy = -264.331402377</p> <p>Enthalpy (H)= -264.297458377</p> <p>Gibbs Free Energy of Solvation=-264.571242398</p> |

| St. Pt.                      | General Structure                                                                   | Ball & Stick model                                                                   |
|------------------------------|-------------------------------------------------------------------------------------|--------------------------------------------------------------------------------------|
| <b>I1<sub>β-H</sub></b>      | 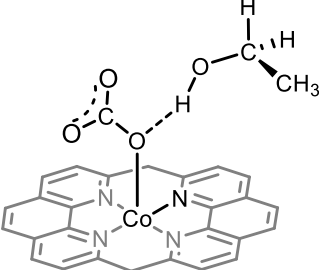 |  |
| <b>Cartesian co-ordinate</b> |                                                                                     | <b>Frequencies</b>                                                                   |
| -----                        |                                                                                     |                                                                                      |

| Atoms | X           | Y           | Z           |           |           |           |
|-------|-------------|-------------|-------------|-----------|-----------|-----------|
|       |             |             |             | 18.4618   | 32.8223   | 50.6160   |
|       |             |             |             | 54.1033   | 61.6389   | 66.7674   |
|       |             |             |             | 79.6152   | 91.1307   | 107.2917  |
| C     | 1.98201300  | 3.71994400  | -0.51296100 | 114.6461  | 127.7864  | 132.7735  |
| C     | 3.23090100  | 3.22340700  | -0.71544500 | 142.9226  | 160.8234  | 177.1214  |
| C     | 3.43278300  | 1.81694000  | -0.89416000 | 203.7412  | 213.8029  | 219.1788  |
| C     | 2.27390400  | 1.03342400  | -0.85713200 | 237.3746  | 248.9135  | 253.2163  |
| C     | 0.82107600  | 2.85616000  | -0.46739300 | 258.5344  | 276.0505  | 279.5671  |
| C     | 4.68774800  | 1.17677400  | -1.07778200 | 292.6516  | 308.8673  | 340.7961  |
| C     | 2.35871900  | -0.38270600 | -1.00400700 | 351.1157  | 352.2569  | 379.0226  |
| C     | 3.60170000  | -0.99861100 | -1.17514900 | 391.6094  | 406.4994  | 407.7515  |
| C     | 4.76863600  | -0.18858000 | -1.21162600 | 412.3074  | 447.8813  | 449.2566  |
| C     | 3.57380700  | -2.42596700 | -1.28037100 | 459.6344  | 470.5324  | 477.3630  |
| H     | 4.50831500  | -2.96568300 | -1.41171100 | 487.2654  | 492.8454  | 494.3290  |
| C     | 2.39623100  | -3.09581000 | -1.19325500 | 497.1888  | 537.5428  | 556.5291  |
| C     | 1.14316000  | -2.40211400 | -0.99410800 | 579.5417  | 586.5008  | 595.1268  |
| H     | 5.58736200  | 1.78588100  | -1.09838200 | 597.0373  | 599.6729  | 623.3529  |
| H     | 1.82541200  | 4.78359600  | -0.36400100 | 633.7417  | 679.7265  | 683.8864  |
| H     | 4.09150200  | 3.88777500  | -0.73265600 | 689.2964  | 691.8959  | 712.6152  |
| H     | 5.73427100  | -0.67044600 | -1.33888200 | 716.2292  | 717.4330  | 730.5093  |
| H     | 2.36920900  | -4.17939300 | -1.24512000 | 740.3646  | 742.1147  | 750.6054  |
| N     | 1.02462400  | 1.53506600  | -0.66581700 | 758.4786  | 760.4295  | 769.8900  |
| N     | 1.17860500  | -1.05330700 | -0.95017300 | 807.3399  | 817.2832  | 820.7338  |
| Co    | -0.24242900 | 0.11654400  | -0.41769300 | 821.6389  | 823.9215  | 825.8397  |
| C     | -2.90021400 | 0.66618500  | -0.30168200 | 844.0989  | 854.5677  | 858.4709  |
| C     | -1.67100500 | 2.67501900  | -0.19780200 | 859.6049  | 863.0397  | 865.0342  |
| C     | -2.81355400 | -0.75026800 | -0.43643600 | 909.6813  | 920.3572  | 921.9553  |
| C     | -4.14183900 | 1.28234800  | -0.14351600 | 942.3843  | 943.8344  | 947.7737  |
| C     | -2.92411900 | 3.37160200  | -0.01714900 | 960.6022  | 960.8070  | 991.4196  |
| C     | -3.96913900 | -1.53159000 | -0.41137800 | 997.8223  | 1001.1088 | 1002.6279 |
| C     | -5.31427900 | 0.47331400  | -0.12639200 | 1010.3842 | 1042.5362 | 1115.2209 |
| C     | -4.10910400 | 2.70390200  | 0.00687100  | 1116.8526 | 1134.8792 | 1141.2871 |
| H     | -2.89131600 | 4.44944000  | 0.10517100  | 1141.8092 | 1157.0185 | 1166.9742 |
| C     | -3.76272300 | -2.94161000 | -0.53393700 | 1167.4957 | 1178.7483 | 1180.3521 |
| C     | -5.23034200 | -0.88888200 | -0.25610400 | 1180.7115 | 1231.6382 | 1237.5838 |
| C     | -1.34818600 | -2.58111300 | -0.70802800 | 1242.5278 | 1244.8589 | 1257.0314 |
|       |             |             |             | 1258.8451 | 1279.1663 | 1302.4857 |
|       |             |             |             | 1303.3053 | 1315.8218 | 1327.8662 |
|       |             |             |             | 1349.5949 | 1389.5455 | 1400.1306 |
|       |             |             |             | 1403.5103 | 1417.5577 | 1427.2807 |
|       |             |             |             | 1430.7258 | 1439.0088 | 1455.8059 |
|       |             |             |             | 1461.0999 | 1469.8416 | 1476.9881 |
|       |             |             |             | 1478.9742 | 1481.5979 | 1485.1110 |
|       |             |             |             | 1488.4309 | 1492.0286 | 1510.8297 |
|       |             |             |             | 1517.9246 | 1524.5792 | 1539.1454 |
|       |             |             |             | 1540.4019 | 1571.4642 | 1573.3611 |
|       |             |             |             | 1581.1506 | 1627.2797 | 1637.8654 |
|       |             |             |             | 1664.2578 | 1687.6467 | 1701.3461 |
|       |             |             |             | 1708.3553 | 1715.3035 | 1723.6936 |
|       |             |             |             | 1814.7797 | 3011.9195 | 3043.4193 |
|       |             |             |             | 3053.5070 | 3125.6762 | 3159.9634 |
|       |             |             |             | 3185.5971 | 3188.2791 | 3193.7024 |

|   |             |             |             |           |           |           |
|---|-------------|-------------|-------------|-----------|-----------|-----------|
| H | -6.27996400 | 0.95555700  | -0.00103800 | 3195.1604 | 3200.4132 | 3201.4660 |
| H | -5.04243200 | 3.24364400  | 0.14869000  | 3214.6803 | 3216.2553 | 3218.0356 |
| C | -2.50692500 | -3.44474600 | -0.67356400 | 3218.5903 | 3219.5600 | 3219.9729 |
| H | -4.62202300 | -3.60739900 | -0.50688400 | 3221.4497 | 3223.3646 | 3624.8746 |
| H | -6.12864600 | -1.50003600 | -0.23613300 |           |           |           |
| H | -2.34290300 | -4.51416200 | -0.75831400 |           |           |           |
| N | -1.71878300 | 1.33620500  | -0.34335600 |           |           |           |
| N | -1.56147900 | -1.25360000 | -0.59286500 |           |           |           |
| O | 2.47614100  | -1.71003100 | 1.72466300  |           |           |           |
| C | 3.33879800  | -0.69668900 | 2.17864100  |           |           |           |
| H | 4.36386600  | -1.01913200 | 1.94410600  |           |           |           |
| H | 3.16656800  | 0.24229700  | 1.62542000  |           |           |           |
| C | -0.45724300 | 3.39103500  | -0.24158600 |           |           |           |
| H | -0.51938800 | 4.46401000  | -0.09933100 |           |           |           |
| C | -0.05936300 | -3.12094900 | -0.87973100 |           |           |           |
| H | 0.01187200  | -4.20116800 | -0.93637000 |           |           |           |
| H | 1.57585800  | -1.33023600 | 1.78655000  |           |           |           |
| C | 3.17482800  | -0.43839400 | 3.67077600  |           |           |           |
| H | 3.41222800  | -1.34483000 | 4.23699400  |           |           |           |
| H | 3.83415000  | 0.36985100  | 4.00966200  |           |           |           |
| H | 2.12974500  | -0.17611400 | 3.86332400  |           |           |           |
| O | -0.09369000 | -0.48085500 | 3.43564500  |           |           |           |
| C | -0.68445400 | -0.24241500 | 2.36755100  |           |           |           |
| O | -1.89043500 | -0.13348300 | 2.10006100  |           |           |           |
| O | 0.25176600  | -0.09167500 | 1.32378700  |           |           |           |

#### Statistical Thermodynamic Analysis

Temperature=403.15 K

Zero-point correction= 0.440599

Internal Energy (E)= -1781.14653035

Gibbs Free Energy (G)=-1781.29191235

Pressure =1 atm

Electronic Energy = -1781.63922635

Enthalpy (H)= -1781.14525335

Gibbs Free Energy of Solvation=-1781.92558115

| St.Pt.                       | General Structure                                                                 | Ball & Stick model                                                                 |             |           |           |           |
|------------------------------|-----------------------------------------------------------------------------------|------------------------------------------------------------------------------------|-------------|-----------|-----------|-----------|
| TS1 <sub>β-H</sub>           | 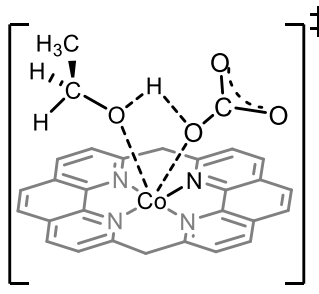 |  |             |           |           |           |
| <b>Cartesian co-ordinate</b> |                                                                                   | <b>Frequencies</b>                                                                 |             |           |           |           |
| -----                        |                                                                                   |                                                                                    |             |           |           |           |
| <b>Atoms</b>                 | <b>X</b>                                                                          | <b>Y</b>                                                                           | <b>Z</b>    |           |           |           |
| -----                        |                                                                                   |                                                                                    |             |           |           |           |
| C                            | -2.08919000                                                                       | -3.66098200                                                                        | -0.59414400 | -302.1743 | 22.4894   | 37.3146   |
| C                            | -3.37934900                                                                       | -3.23440500                                                                        | -0.58639300 | 47.3178   | 51.6276   | 62.8059   |
| C                            | -3.67771200                                                                       | -1.83164500                                                                        | -0.60556100 | 68.9365   | 94.3377   | 106.8843  |
| C                            | -2.56138700                                                                       | -0.98134600                                                                        | -0.62109300 | 112.5409  | 124.8035  | 140.8861  |
| C                            | -0.97921500                                                                       | -2.73120900                                                                        | -0.61549500 | 157.2396  | 165.7974  | 175.3826  |
| C                            | -4.96974600                                                                       | -1.25289300                                                                        | -0.61098800 | 189.2359  | 210.4737  | 216.9521  |
| C                            | -2.73578000                                                                       | 0.43510800                                                                         | -0.64008500 | 237.2309  | 251.4706  | 256.6869  |
| C                            | -4.02492300                                                                       | 0.99040900                                                                         | -0.63505800 | 263.0141  | 271.7054  | 275.7796  |
| C                            | -5.13859700                                                                       | 0.11666700                                                                         | -0.62489400 | 288.0241  | 305.3497  | 331.9377  |
| C                            | -4.07782900                                                                       | 2.42134600                                                                         | -0.64378000 | 337.0584  | 349.4420  | 361.8875  |
| H                            | -5.04509100                                                                       | 2.91751100                                                                         | -0.64145600 | 382.6926  | 395.6382  | 405.3702  |
| C                            | -2.92801200                                                                       | 3.14779800                                                                         | -0.63633400 | 406.6051  | 446.0968  | 455.4988  |
| C                            | -1.62872000                                                                       | 2.51281100                                                                         | -0.62364200 | 457.7365  | 471.9609  | 479.3368  |
| H                            | -5.83632200                                                                       | -1.90837500                                                                        | -0.60013600 | 486.9825  | 487.1914  | 492.7092  |
| H                            | -1.85707100                                                                       | -4.72098800                                                                        | -0.57538600 | 494.9873  | 536.0652  | 552.0764  |
| H                            | -4.19709500                                                                       | -3.95031300                                                                        | -0.56226000 | 572.7051  | 586.3645  | 590.8555  |
| H                            | -6.13834700                                                                       | 0.54251600                                                                         | -0.62535300 | 595.1033  | 596.0456  | 616.4035  |
| H                            | -2.95980600                                                                       | 4.23266100                                                                         | -0.62339800 | 630.3779  | 654.0052  | 672.8328  |
| N                            | -1.27790800                                                                       | -1.40827600                                                                        | -0.62142600 | 676.4716  | 684.5647  | 705.3501  |
| N                            | -1.59278300                                                                       | 1.15863700                                                                         | -0.65858900 | 713.7840  | 716.4446  | 738.6335  |
| Co                           | -0.05381700                                                                       | 0.03830100                                                                         | -0.3690630  | 745.9832  | 746.3999  | 759.4451  |
| C                            | 2.61313700                                                                        | -0.35450300                                                                        | -0.71428500 | 762.9370  | 766.5930  | 801.8634  |
| C                            | 1.51543300                                                                        | -2.42260200                                                                        | -0.71854200 | 816.3392  | 823.7501  | 825.0518  |
|                              |                                                                                   |                                                                                    |             | 826.0709  | 829.2523  | 839.4303  |
|                              |                                                                                   |                                                                                    |             | 851.0589  | 853.5501  | 857.8687  |
|                              |                                                                                   |                                                                                    |             | 860.6936  | 867.5777  | 889.8971  |
|                              |                                                                                   |                                                                                    |             | 907.6932  | 915.3779  | 921.4408  |
|                              |                                                                                   |                                                                                    |             | 938.9812  | 944.5424  | 952.5181  |
|                              |                                                                                   |                                                                                    |             | 960.0494  | 983.2738  | 989.8136  |
|                              |                                                                                   |                                                                                    |             | 997.2339  | 1000.7096 | 1004.8093 |
|                              |                                                                                   |                                                                                    |             | 1036.1447 | 1072.4172 | 1116.5335 |
|                              |                                                                                   |                                                                                    |             | 1127.9971 | 1139.5840 | 1147.5387 |
|                              |                                                                                   |                                                                                    |             | 1153.4429 | 1156.9244 | 1167.9827 |
|                              |                                                                                   |                                                                                    |             | 1176.9831 | 1179.7898 | 1188.9186 |
|                              |                                                                                   |                                                                                    |             | 1205.3451 | 1233.8853 | 1242.5798 |
|                              |                                                                                   |                                                                                    |             | 1244.1016 | 1246.9351 | 1259.3778 |
|                              |                                                                                   |                                                                                    |             | 1260.6359 | 1283.2716 | 1303.6408 |
|                              |                                                                                   |                                                                                    |             | 1305.0160 | 1307.8654 | 1327.0402 |



|   |             |             |             |           |           |           |
|---|-------------|-------------|-------------|-----------|-----------|-----------|
| C | 2.44506900  | 1.06043500  | -0.65389000 | 1334.6272 | 1364.0272 | 1392.3736 |
| C | 3.89615300  | -0.91205900 | -0.76474400 | 1394.1610 | 1403.0261 | 1413.3114 |
| C | 2.80477800  | -3.06240900 | -0.81566000 | 1418.7231 | 1425.3660 | 1433.8350 |
| C | 3.56079100  | 1.91138300  | -0.65191200 | 1436.8688 | 1466.3598 | 1468.0986 |
| C | 5.01219900  | -0.03769200 | -0.76091200 | 1469.4120 | 1471.1809 | 1480.8938 |
| C | 3.95215600  | -2.33938200 | -0.84227600 | 1486.0900 | 1497.3783 | 1504.9440 |
| H | 2.83019300  | -4.14673800 | -0.82622300 | 1507.6192 | 1515.5243 | 1524.8660 |
| C | 3.26623200  | 3.30929700  | -0.60469000 | 1527.7554 | 1556.7328 | 1578.1111 |
| C | 4.85258200  | 1.32925100  | -0.70551200 | 1585.5301 | 1618.1994 | 1633.7732 |
| C | 0.87050500  | 2.81169500  | -0.58193700 | 1658.0983 | 1672.2197 | 1695.9834 |
| H | 6.00958800  | -0.46710100 | -0.79927900 | 1700.4805 | 1704.9806 | 1714.9915 |
| H | 4.91935200  | -2.83194900 | -0.89223700 | 1828.5108 | 2518.2550 | 2881.3875 |
| C | 1.97466600  | 3.74036300  | -0.57835800 | 2905.4128 | 3033.9151 | 3117.7219 |
| H | 4.08547600  | 4.02382500  | -0.58966000 | 3142.4533 | 3183.8220 | 3185.4926 |
| H | 5.72147700  | 1.98149300  | -0.69971900 | 3188.0790 | 3188.8849 | 3190.8980 |
| H | 1.74580600  | 4.80054200  | -0.54213000 | 3194.5167 | 3210.5051 | 3211.3421 |
| N | 1.46864400  | -1.07641900 | -0.74412900 | 3214.4840 | 3214.8821 | 3217.2803 |
| N | 1.16278600  | 1.49582500  | -0.61496300 | 3221.7227 | 3222.5956 | 3226.8717 |
| O | -0.53107200 | 1.29528500  | 1.68693500  |           |           |           |
| C | -1.72125400 | 1.09030000  | 2.34544600  |           |           |           |
| H | -2.48727900 | 1.84770100  | 2.06128100  |           |           |           |
| H | -2.18049200 | 0.10471800  | 2.09629600  |           |           |           |
| C | 0.33832100  | -3.19747900 | -0.66576500 |           |           |           |
| H | 0.47254100  | -4.27323900 | -0.64063100 |           |           |           |
| C | -0.45937600 | 3.28231800  | -0.58952400 |           |           |           |
| H | -0.58831700 | 4.35913700  | -0.55959000 |           |           |           |
| H | 0.16539500  | 0.06015700  | 1.96306300  |           |           |           |
| C | -1.50694300 | 1.12040800  | 3.86230400  |           |           |           |
| H | -1.13818700 | 2.10604500  | 4.16357300  |           |           |           |
| H | -2.42912800 | 0.90190600  | 4.41618700  |           |           |           |
| H | -0.73666500 | 0.38481300  | 4.11735400  |           |           |           |
| O | 1.71920700  | -0.74363500 | 3.50904700  |           |           |           |
| C | 1.61286200  | -1.30143200 | 2.40769600  |           |           |           |
| O | 2.30997900  | -2.16495400 | 1.84562400  |           |           |           |
| O | 0.47073100  | -0.87971100 | 1.66068500  |           |           |           |

### Statistical Thermodynamic Analysis

Temperature=403.15 K

Pressure=1 atm

Zero-point correction= 0.436712

Electronic Energy = -1781.63922635

Internal Energy (E)= -1781.15145335

Enthalpy (H)= -1781.15017635

Gibbs Free Energy (G)=-1781.29374335

Gibbs Free Energy of Solvation=-1781.92741215

| St. Point.                  | General Structure                                                                 | Ball & Stick model                                                                 |          |           |
|-----------------------------|-----------------------------------------------------------------------------------|------------------------------------------------------------------------------------|----------|-----------|
| <b>I2<sub>β</sub>-H</b>     | 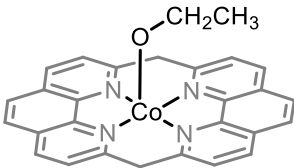 |  |          |           |
| <b>Cartesian coordinate</b> |                                                                                   | <b>Frequencies</b>                                                                 |          |           |
| -----                       |                                                                                   |                                                                                    |          |           |
| <b>Atoms</b>                | <b>X</b>                                                                          | <b>Y</b>                                                                           | <b>Z</b> |           |
| -----                       |                                                                                   |                                                                                    |          |           |
| C                           | 2.60086                                                                           | 3.45682                                                                            | -0.02758 | 48.0894   |
| C                           | 3.81678                                                                           | 2.84881                                                                            | -0.05344 | 60.1269   |
| C                           | 3.91008                                                                           | 1.42216                                                                            | -0.14126 | 69.2892   |
| C                           | 2.69042                                                                           | 0.74206                                                                            | -0.20304 | 76.7207   |
| C                           | 1.37187                                                                           | 2.697                                                                              | -0.09249 | 95.0908   |
| C                           | 5.11562                                                                           | 0.66861                                                                            | -0.16736 | 120.7307  |
| C                           | 2.66557                                                                           | -0.67922                                                                           | -0.2746  | 127.2776  |
| C                           | 3.85805                                                                           | -1.40793                                                                           | -0.29953 | 132.3114  |
| C                           | 5.09138                                                                           | -0.70239                                                                           | -0.2466  | 169.5865  |
| C                           | 3.71172                                                                           | -2.82976                                                                           | -0.37794 | 187.4497  |
| H                           | 4.60079                                                                           | -3.45396                                                                           | -0.4023  | 210.1555  |
| C                           | 2.4744                                                                            | -3.3937                                                                            | -0.41919 | 218.2708  |
| C                           | 1.27607                                                                           | -2.58735                                                                           | -0.38074 | 234.2724  |
| H                           | 6.06295                                                                           | 1.19775                                                                            | -0.12347 | 249.6663  |
| H                           | 2.52346                                                                           | 4.5362                                                                             | 0.04884  | 257.7406  |
| H                           | 4.72803                                                                           | 3.4385                                                                             | -0.00256 | 274.4765  |
| H                           | 6.01829                                                                           | -1.26755                                                                           | -0.26773 | 280.1279  |
| H                           | 2.35762                                                                           | -4.47071                                                                           | -0.47576 | 304.5799  |
|                             |                                                                                   |                                                                                    |          | 318.2987  |
|                             |                                                                                   |                                                                                    |          | 340.7718  |
|                             |                                                                                   |                                                                                    |          | 347.4337  |
|                             |                                                                                   |                                                                                    |          | 354.2285  |
|                             |                                                                                   |                                                                                    |          | 384.8917  |
|                             |                                                                                   |                                                                                    |          | 400.9060  |
|                             |                                                                                   |                                                                                    |          | 406.5439  |
|                             |                                                                                   |                                                                                    |          | 410.0409  |
|                             |                                                                                   |                                                                                    |          | 434.7781  |
|                             |                                                                                   |                                                                                    |          | 449.2930  |
|                             |                                                                                   |                                                                                    |          | 461.4922  |
|                             |                                                                                   |                                                                                    |          | 473.2296  |
|                             |                                                                                   |                                                                                    |          | 478.3070  |
|                             |                                                                                   |                                                                                    |          | 483.8341  |
|                             |                                                                                   |                                                                                    |          | 486.3706  |
|                             |                                                                                   |                                                                                    |          | 495.2656  |
|                             |                                                                                   |                                                                                    |          | 496.9473  |
|                             |                                                                                   |                                                                                    |          | 540.2646  |
|                             |                                                                                   |                                                                                    |          | 557.2857  |
|                             |                                                                                   |                                                                                    |          | 584.3483  |
|                             |                                                                                   |                                                                                    |          | 585.9247  |
|                             |                                                                                   |                                                                                    |          | 596.0417  |
|                             |                                                                                   |                                                                                    |          | 596.3464  |
|                             |                                                                                   |                                                                                    |          | 601.3084  |
|                             |                                                                                   |                                                                                    |          | 608.9938  |
|                             |                                                                                   |                                                                                    |          | 626.8071  |
|                             |                                                                                   |                                                                                    |          | 680.6048  |
|                             |                                                                                   |                                                                                    |          | 687.1125  |
|                             |                                                                                   |                                                                                    |          | 689.7760  |
|                             |                                                                                   |                                                                                    |          | 712.7308  |
|                             |                                                                                   |                                                                                    |          | 716.7610  |
|                             |                                                                                   |                                                                                    |          | 720.3470  |
|                             |                                                                                   |                                                                                    |          | 743.8607  |
|                             |                                                                                   |                                                                                    |          | 744.7817  |
|                             |                                                                                   |                                                                                    |          | 751.7917  |
|                             |                                                                                   |                                                                                    |          | 758.4698  |
|                             |                                                                                   |                                                                                    |          | 766.5429  |
|                             |                                                                                   |                                                                                    |          | 767.9801  |
|                             |                                                                                   |                                                                                    |          | 798.4472  |
|                             |                                                                                   |                                                                                    |          | 815.0668  |
|                             |                                                                                   |                                                                                    |          | 820.8864  |
|                             |                                                                                   |                                                                                    |          | 825.9123  |
|                             |                                                                                   |                                                                                    |          | 829.4720  |
|                             |                                                                                   |                                                                                    |          | 855.8644  |
|                             |                                                                                   |                                                                                    |          | 861.6456  |
|                             |                                                                                   |                                                                                    |          | 866.7535  |
|                             |                                                                                   |                                                                                    |          | 870.9824  |
|                             |                                                                                   |                                                                                    |          | 878.0582  |
|                             |                                                                                   |                                                                                    |          | 908.7602  |
|                             |                                                                                   |                                                                                    |          | 919.5769  |
|                             |                                                                                   |                                                                                    |          | 922.4538  |
|                             |                                                                                   |                                                                                    |          | 942.7592  |
|                             |                                                                                   |                                                                                    |          | 949.2150  |
|                             |                                                                                   |                                                                                    |          | 971.9395  |
|                             |                                                                                   |                                                                                    |          | 973.0510  |
|                             |                                                                                   |                                                                                    |          | 1011.7704 |
|                             |                                                                                   |                                                                                    |          | 1013.1818 |
|                             |                                                                                   |                                                                                    |          | 1014.0382 |
|                             |                                                                                   |                                                                                    |          | 1017.5873 |
|                             |                                                                                   |                                                                                    |          | 1018.1084 |
|                             |                                                                                   |                                                                                    |          | 1044.8251 |
|                             |                                                                                   |                                                                                    |          | 1099.2792 |
|                             |                                                                                   |                                                                                    |          | 1121.4760 |
|                             |                                                                                   |                                                                                    |          | 1136.2954 |
|                             |                                                                                   |                                                                                    |          | 1143.6523 |
|                             |                                                                                   |                                                                                    |          | 1160.3594 |
|                             |                                                                                   |                                                                                    |          | 1163.7154 |
|                             |                                                                                   |                                                                                    |          | 1169.5190 |
|                             |                                                                                   |                                                                                    |          | 1173.1579 |
|                             |                                                                                   |                                                                                    |          | 1177.0765 |
|                             |                                                                                   |                                                                                    |          | 1182.7175 |
|                             |                                                                                   |                                                                                    |          | 1185.7258 |
|                             |                                                                                   |                                                                                    |          | 1235.3664 |
|                             |                                                                                   |                                                                                    |          | 1241.0955 |
|                             |                                                                                   |                                                                                    |          | 1245.2521 |
|                             |                                                                                   |                                                                                    |          | 1248.4061 |

|    |          |          |          |           |           |           |
|----|----------|----------|----------|-----------|-----------|-----------|
| N  | 1.47585  | 1.35499  | -0.2039  | 1258.7366 | 1259.2478 | 1279.0274 |
| N  | 1.42712  | -1.24659 | -0.31732 | 1301.5028 | 1304.8074 | 1322.2752 |
| Co | 0.06192  | 0.07453  | -0.08634 | 1330.8892 | 1388.0743 | 1391.1005 |
| C  | -2.52924 | 0.8478   | -0.33926 | 1398.9677 | 1420.9177 | 1421.6173 |
| C  | -1.13866 | 2.74769  | -0.15121 | 1428.6937 | 1435.6525 | 1455.8844 |
| C  | -2.55759 | -0.5722  | -0.41549 | 1460.0989 | 1466.9856 | 1476.5086 |
| C  | -3.72148 | 1.57732  | -0.33906 | 1482.5175 | 1483.9766 | 1485.9878 |
| C  | -2.33813 | 3.55662  | -0.14916 | 1487.2218 | 1495.5119 | 1499.7403 |
| C  | -3.77562 | -1.25274 | -0.49145 | 1515.9426 | 1521.3595 | 1536.5409 |
| C  | -4.95319 | 0.87387  | -0.42738 | 1571.7394 | 1573.0089 | 1578.2092 |
| C  | -3.5745  | 2.99902  | -0.24008 | 1628.5736 | 1637.8713 | 1663.4661 |
| H  | -2.22075 | 4.63198  | -0.06683 | 1684.6426 | 1703.0731 | 1705.6853 |
| C  | -3.6826  | -2.68166 | -0.5377  | 1713.5316 | 1723.0758 | 3003.1851 |
| C  | -4.98034 | -0.49777 | -0.502   | 3036.8011 | 3061.1295 | 3138.4145 |
| C  | -1.2395  | -2.53611 | -0.42889 | 3155.4073 | 3200.6954 | 3202.3947 |
| H  | -5.8792  | 1.44103  | -0.43163 | 3207.9390 | 3208.6529 | 3215.8406 |
| H  | -4.46231 | 3.62532  | -0.2337  | 3217.0286 | 3218.6167 | 3219.6409 |
| C  | -2.46866 | -3.29405 | -0.5085  | 3224.0022 | 3227.3139 | 3230.2840 |
| H  | -4.59382 | -3.2711  | -0.59209 | 3233.1601 | 3233.3698 | 3234.7155 |
| H  | -5.92749 | -1.02493 | -0.56586 |           |           |           |
| H  | -2.39347 | -4.37575 | -0.54007 |           |           |           |
| N  | -1.29169 | 1.40964  | -0.26479 |           |           |           |
| N  | -1.34024 | -1.18809 | -0.38463 |           |           |           |
| O  | 0.08188  | 0.14414  | 1.73463  |           |           |           |
| C  | -0.15076 | -1.02745 | 2.45524  |           |           |           |
| H  | 0.51954  | -1.00643 | 3.33048  |           |           |           |
| H  | 0.12593  | -1.933   | 1.88973  |           |           |           |
| C  | 0.12712  | 3.35002  | -0.05554 |           |           |           |
| H  | 0.14686  | 4.42993  | 0.03221  |           |           |           |
| C  | 0.00405  | -3.19312 | -0.40196 |           |           |           |
| H  | -0.01775 | -4.276   | -0.4378  |           |           |           |
| C  | -1.59348 | -1.15604 | 2.93508  |           |           |           |
| H  | -1.70859 | -2.022   | 3.59574  |           |           |           |
| H  | -1.88367 | -0.25702 | 3.48545  |           |           |           |
| H  | -2.28214 | -1.27511 | 2.09322  |           |           |           |

### Statistical Thermodynamic Analysis

Temperature = 403.15 K

Pressure = 1 atm

Zero-point correction = 0.412968

Electronic Energy = -1517.27794481

Internal Energy (E) = -1516.82107581

Enthalpy (H) = -1516.81979881

Gibbs Free Energy (G) = -1516.94483381

Gibbs Free Energy of Solvation = -1516.96123418

| St. Point          | General Structure                                                                 | Ball & Stick model                                                                 |          |           |           |           |
|--------------------|-----------------------------------------------------------------------------------|------------------------------------------------------------------------------------|----------|-----------|-----------|-----------|
| TS2 <sub>β-H</sub> | 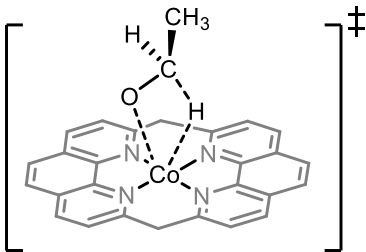 |  |          |           |           |           |
|                    | <b>Cartesian coordinate</b>                                                       | <b>Frequencies</b>                                                                 |          |           |           |           |
|                    | -----                                                                             |                                                                                    |          |           |           |           |
| <b>Atoms</b>       | <b>X</b>                                                                          | <b>Y</b>                                                                           | <b>Z</b> | -422.6225 | 45.8138   | 59.7434   |
|                    |                                                                                   |                                                                                    |          | 61.5145   | 67.5513   | 97.8821   |
|                    |                                                                                   |                                                                                    |          | 110.9663  | 125.2925  | 153.6859  |
|                    |                                                                                   |                                                                                    |          | 165.8689  | 202.1548  | 203.4776  |
|                    |                                                                                   |                                                                                    |          | 207.7767  | 225.9279  | 247.1280  |
|                    |                                                                                   |                                                                                    |          | 250.1343  | 255.0590  | 267.1302  |
|                    |                                                                                   |                                                                                    |          | 268.4260  | 290.7691  | 323.9920  |
|                    |                                                                                   |                                                                                    |          | 331.5621  | 340.2559  | 374.4936  |
|                    |                                                                                   |                                                                                    |          | 380.1285  | 397.5746  | 403.0641  |
|                    |                                                                                   |                                                                                    |          | 429.1373  | 445.1155  | 457.9594  |
|                    |                                                                                   |                                                                                    |          | 460.8889  | 462.3691  | 470.9448  |
|                    |                                                                                   |                                                                                    |          | 488.0528  | 489.7880  | 493.5863  |
|                    |                                                                                   |                                                                                    |          | 508.0020  | 538.1700  | 554.0692  |
|                    |                                                                                   |                                                                                    |          | 581.7656  | 586.3870  | 591.0206  |
|                    |                                                                                   |                                                                                    |          | 595.1513  | 597.8066  | 611.1024  |
|                    |                                                                                   |                                                                                    |          | 623.8296  | 674.0662  | 682.1631  |
|                    |                                                                                   |                                                                                    |          | 683.3547  | 710.9276  | 712.5432  |
|                    |                                                                                   |                                                                                    |          | 720.2022  | 726.7222  | 737.5890  |
|                    |                                                                                   |                                                                                    |          | 742.4473  | 751.6120  | 757.0217  |
|                    |                                                                                   |                                                                                    |          | 765.7450  | 788.6829  | 807.8828  |
|                    |                                                                                   |                                                                                    |          | 809.2090  | 817.1224  | 820.8962  |
|                    |                                                                                   |                                                                                    |          | 847.9341  | 854.3539  | 857.9835  |
|                    |                                                                                   |                                                                                    |          | 860.9254  | 864.7028  | 871.3842  |
|                    |                                                                                   |                                                                                    |          | 909.5480  | 921.6058  | 928.4424  |
|                    |                                                                                   |                                                                                    |          | 933.5999  | 944.6302  | 964.7155  |
|                    |                                                                                   |                                                                                    |          | 968.4684  | 989.6053  | 1005.3077 |
|                    |                                                                                   |                                                                                    |          | 1009.1728 | 1009.9121 | 1010.2631 |
|                    |                                                                                   |                                                                                    |          | 1012.3829 | 1037.9759 | 1116.6885 |
|                    |                                                                                   |                                                                                    |          | 1132.0559 | 1135.9257 | 1140.7016 |
|                    |                                                                                   |                                                                                    |          | 1153.5492 | 1167.0946 | 1168.3357 |

|    |          |          |          |           |           |           |
|----|----------|----------|----------|-----------|-----------|-----------|
| H  | -5.99482 | 1.13282  | -0.61471 | 1179.5503 | 1181.9524 | 1202.9809 |
| H  | -2.54777 | 4.48594  | 0.08139  | 1230.6800 | 1236.2253 | 1242.6591 |
| N  | -1.33056 | -1.26763 | -0.37229 | 1245.7777 | 1255.9204 | 1257.4020 |
| N  | -1.46351 | 1.30974  | 0.11559  | 1274.1196 | 1296.8475 | 1300.3316 |
| Co | -0.00701 | 0.04648  | 0.34604  | 1326.9646 | 1375.8842 | 1386.0343 |
| C  | 2.59204  | -0.6002  | -0.28881 | 1397.0732 | 1410.7356 | 1412.3197 |
| C  | 1.31327  | -2.57172 | -0.14183 | 1414.0707 | 1423.0214 | 1447.5362 |
| C  | 2.5154   | 0.80996  | -0.4389  | 1450.8654 | 1470.6209 | 1473.6079 |
| C  | 3.80778  | -1.2616  | -0.48403 | 1478.5379 | 1481.7862 | 1483.4378 |
| C  | 2.55244  | -3.31738 | -0.25772 | 1485.3783 | 1487.0473 | 1491.2971 |
| C  | 3.66875  | 1.55435  | -0.69964 | 1522.3788 | 1537.5497 | 1568.8532 |
| C  | 4.97138  | -0.49498 | -0.76533 | 1575.9795 | 1580.3674 | 1591.9280 |
| C  | 3.74954  | -2.69263 | -0.39981 | 1623.0384 | 1638.9789 | 1663.3552 |
| H  | 2.48788  | -4.40049 | -0.2618  | 1689.7813 | 1697.2732 | 1706.7240 |
| C  | 3.48827  | 2.97334  | -0.76816 | 1713.7800 | 1721.0515 | 1750.0994 |
| C  | 4.90589  | 0.87256  | -0.86246 | 3001.2512 | 3070.9289 | 3153.8344 |
| C  | 1.10007  | 2.70098  | -0.27563 | 3183.6023 | 3198.2220 | 3199.1409 |
| H  | 5.91627  | -1.01099 | -0.90763 | 3203.0955 | 3204.5797 | 3204.7548 |
| H  | 4.66577  | -3.26895 | -0.49661 | 3205.0958 | 3216.1549 | 3220.7534 |
| C  | 2.26377  | 3.51769  | -0.55068 | 3222.4129 | 3224.2872 | 3225.3224 |
| H  | 4.34453  | 3.60856  | -0.9784  | 3228.1169 | 3229.9215 | 3231.1351 |
| H  | 5.79826  | 1.45332  | -1.07557 |           |           |           |
| H  | 2.1224   | 4.59291  | -0.574   |           |           |           |
| N  | 1.41701  | -1.22798 | 0.00813  |           |           |           |
| N  | 1.26764  | 1.35644  | -0.30458 |           |           |           |
| O  | -0.79943 | -0.82918 | 2.15518  |           |           |           |
| C  | 0.0112   | -0.06373 | 2.72844  |           |           |           |
| H  | -0.35773 | 0.89681  | 3.135    |           |           |           |
| H  | 0.63821  | 0.72482  | 1.51242  |           |           |           |
| C  | 0.08286  | -3.22613 | -0.25137 |           |           |           |
| H  | 0.10683  | -4.30637 | -0.33183 |           |           |           |
| C  | -0.13295 | 3.31294  | -0.00345 |           |           |           |
| H  | -0.15074 | 4.39596  | -0.00823 |           |           |           |
| C  | 1.30788  | -0.58646 | 3.30715  |           |           |           |
| H  | 2.04438  | 0.21032  | 3.43243  |           |           |           |

|                                           |         |          |         |                                                 |
|-------------------------------------------|---------|----------|---------|-------------------------------------------------|
| H                                         | 1.08777 | -1.01262 | 4.29164 |                                                 |
| H                                         | 1.70646 | -1.37295 | 2.66374 |                                                 |
| <b>Statistical Thermodynamic Analysis</b> |         |          |         |                                                 |
| Temperature = 403.15 K                    |         |          |         | Pressure = 1 atm                                |
| Zero-point correction = 0.405907          |         |          |         | Electronic Energy = -1517.20905031              |
| Internal Energy (E) = -1516.75902531      |         |          |         | Enthalpy (H) = -1516.75774931                   |
| Gibbs Free Energy (G) = -1516.88349231    |         |          |         | Gibbs Free Energy of Solvation = -1516.89740641 |

| St. Point                   | General Structure                                                                 | Ball & Stick model                                                                 |          |          |          |           |
|-----------------------------|-----------------------------------------------------------------------------------|------------------------------------------------------------------------------------|----------|----------|----------|-----------|
| I3 $\beta$ -H               | 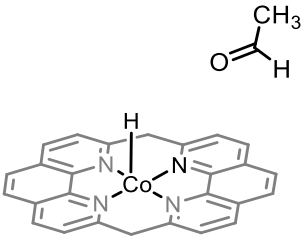 |  |          |          |          |           |
| <b>Cartesian coordinate</b> |                                                                                   | <b>Frequencies</b>                                                                 |          |          |          |           |
| -----                       |                                                                                   |                                                                                    |          |          |          |           |
| <b>Atoms</b>                | <b>X</b>                                                                          | <b>Y</b>                                                                           | <b>Z</b> |          |          |           |
| -----                       |                                                                                   |                                                                                    |          |          |          |           |
| C                           | -2.56816                                                                          | -2.92756                                                                           | -0.88582 | 33.6697  | 47.1846  | 53.3071   |
| C                           | -3.73089                                                                          | -2.22245                                                                           | -0.89379 | 60.4957  | 69.4022  | 101.8097  |
| C                           | -3.71862                                                                          | -0.80289                                                                           | -0.70804 | 109.0813 | 124.2894 | 133.4176  |
| C                           | -2.45849                                                                          | -0.2296                                                                            | -0.52906 | 157.0282 | 164.8441 | 183.9590  |
| C                           | -1.29096                                                                          | -2.28048                                                                           | -0.68998 | 220.1171 | 243.0776 | 244.7602  |
| C                           | -4.86223                                                                          | 0.04266                                                                            | -0.69101 | 249.1575 | 257.3979 | 258.9102  |
| C                           | -2.32618                                                                          | 1.17368                                                                            | -0.335   | 263.9101 | 283.9492 | 304.3191  |
| C                           | -3.45772                                                                          | 1.9931                                                                             | -0.3177  | 338.2252 | 339.8081 | 351.1659  |
| C                           | -4.73618                                                                          | 1.39674                                                                            | -0.50126 | 384.6871 | 405.3109 | 407.5993  |
| C                           | -3.20492                                                                          | 3.3878                                                                             | -0.11195 | 410.8968 | 449.1808 | 461.9743  |
| H                           | -4.04193                                                                          | 4.08026                                                                            | -0.0859  | 462.8057 | 478.2854 | 487.6119  |
| C                           | -1.93259                                                                          | 3.84105                                                                            | 0.05067  | 487.8725 | 493.9356 | 496.3322  |
| C                           | -0.79799                                                                          | 2.94448                                                                            | 0.02296  | 509.0317 | 538.5311 | 559.6665  |
|                             |                                                                                   |                                                                                    |          | 584.8715 | 587.0070 | 596.6118  |
|                             |                                                                                   |                                                                                    |          | 599.0151 | 600.7636 | 628.0707  |
|                             |                                                                                   |                                                                                    |          | 680.4137 | 688.3162 | 689.2268  |
|                             |                                                                                   |                                                                                    |          | 712.5953 | 714.2714 | 717.5887  |
|                             |                                                                                   |                                                                                    |          | 723.9746 | 740.6840 | 745.2943  |
|                             |                                                                                   |                                                                                    |          | 750.3327 | 752.7034 | 764.2181  |
|                             |                                                                                   |                                                                                    |          | 766.9818 | 777.4371 | 804.2462  |
|                             |                                                                                   |                                                                                    |          | 818.6019 | 823.7357 | 829.3477  |
|                             |                                                                                   |                                                                                    |          | 832.7708 | 853.5889 | 862.3120  |
|                             |                                                                                   |                                                                                    |          | 865.2542 | 869.8866 | 871.1246  |
|                             |                                                                                   |                                                                                    |          | 877.2976 | 908.1146 | 908.6812  |
|                             |                                                                                   |                                                                                    |          | 921.0509 | 945.2873 | 953.1647  |
|                             |                                                                                   |                                                                                    |          | 977.0981 | 981.7229 | 1010.3708 |

|    |          |          |          |           |           |           |
|----|----------|----------|----------|-----------|-----------|-----------|
| H  | -5.84285 | -0.4031  | -0.82678 | 1011.2123 | 1012.7877 | 1013.2323 |
| H  | -2.57375 | -4.00421 | -1.0171  | 1013.7848 | 1043.4386 | 1117.9448 |
| H  | -4.68121 | -2.73076 | -1.02927 | 1134.7707 | 1139.3416 | 1145.7254 |
| H  | -5.61633 | 2.03259  | -0.48868 | 1152.1422 | 1158.8126 | 1171.3189 |
| H  | -1.73775 | 4.8965   | 0.20883  | 1172.2337 | 1183.5293 | 1185.5747 |
| N  | -1.29091 | -0.93885 | -0.5188  | 1233.9789 | 1238.9365 | 1243.9897 |
| N  | -1.05002 | 1.6305   | -0.17595 | 1247.0458 | 1259.8455 | 1260.8899 |
| Co | 0.20179  | 0.19779  | -0.18013 | 1277.9152 | 1300.7340 | 1303.6246 |
| C  | 2.74165  | -0.75836 | -0.22332 | 1330.5753 | 1384.5289 | 1392.6889 |
| C  | 1.20943  | -2.53541 | -0.53696 | 1396.0283 | 1417.9498 | 1424.8402 |
| C  | 2.87362  | 0.64695  | -0.03981 | 1429.8596 | 1438.8823 | 1453.2942 |
| C  | 3.87464  | -1.57468 | -0.2628  | 1460.3436 | 1467.3510 | 1472.7303 |
| C  | 2.34661  | -3.42975 | -0.58361 | 1478.3675 | 1480.8884 | 1481.3187 |
| C  | 4.13795  | 1.22338  | 0.10544  | 1483.4483 | 1483.8922 | 1486.4864 |
| C  | 5.15584  | -0.97469 | -0.11758 | 1520.2996 | 1534.4093 | 1572.1185 |
| C  | 3.62049  | -2.97247 | -0.45294 | 1573.0963 | 1579.4002 | 1627.6667 |
| H  | 2.15083  | -4.487   | -0.72827 | 1636.8778 | 1658.7008 | 1684.8405 |
| C  | 4.14908  | 2.64493  | 0.28782  | 1699.7046 | 1707.8297 | 1712.6988 |
| C  | 5.28328  | 0.38141  | 0.06143  | 1720.3997 | 1888.1332 | 2147.8499 |
| C  | 1.70119  | 2.69307  | 0.15838  | 2972.5244 | 3070.7866 | 3146.6925 |
| H  | 6.03708  | -1.60836 | -0.15017 | 3187.0051 | 3200.1926 | 3200.5840 |
| H  | 4.45839  | -3.66327 | -0.49207 | 3204.4762 | 3210.3872 | 3215.3983 |
| C  | 2.98378  | 3.34527  | 0.31383  | 3219.5130 | 3222.6196 | 3223.3297 |
| H  | 5.10039  | 3.15637  | 0.40727  | 3226.0656 | 3227.0370 | 3228.6185 |
| H  | 6.26623  | 0.82973  | 0.17145  | 3230.3999 | 3231.9371 | 3236.5863 |
| H  | 2.98876  | 4.42091  | 0.45502  |           |           |           |
| N  | 1.46369  | -1.21768 | -0.35555 |           |           |           |
| N  | 1.70606  | 1.35208  | -0.02262 |           |           |           |
| O  | -3.1764  | -2.01635 | 2.21475  |           |           |           |
| C  | -2.09816 | -1.50714 | 2.40284  |           |           |           |
| H  | -1.97388 | -0.40548 | 2.31797  |           |           |           |
| H  | 0.11901  | 0.06007  | 1.19264  |           |           |           |
| C  | -0.09841 | -3.03277 | -0.67908 |           |           |           |

|   |          |          |         |  |
|---|----------|----------|---------|--|
| H | -0.19949 | -4.10296 | -0.8165 |  |
| C | 0.50959  | 3.43904  | 0.18934 |  |
| H | 0.60909  | 4.50743  | 0.3409  |  |
| C | -0.85272 | -2.27483 | 2.75065 |  |
| H | -0.10566 | -2.13173 | 1.96166 |  |
| H | -0.42622 | -1.88661 | 3.68138 |  |
| H | -1.08728 | -3.33505 | 2.85145 |  |

  

| Statistical Thermodynamic Analysis     |                                                 |
|----------------------------------------|-------------------------------------------------|
| Temperature = 403.15 K                 | Pressure = 1 atm                                |
| Zero-point correction = 0.407941       | Electronic Energy = -1517.26912963              |
| Internal Energy (E) = -1516.81587963   | Enthalpy (H) = -1516.81460363                   |
| Gibbs Free Energy (G) = -1516.94483463 | Gibbs Free Energy of Solvation = -1516.95870052 |

| St. Point                                                                                                                                                                                                                                                                                                                                                                                                                                                                                                                                                                                                                                                                                                                                              | General Structure                                                                   | Ball & Stick model                                                                   |          |   |   |   |         |         |          |   |         |         |          |   |         |        |         |   |         |         |          |   |         |         |          |   |         |         |          |   |         |          |          |                                                                                                                                                                                                                                                                                                                                                                                                                                                                                                                                                                                                                                                                                                                                                                                                                                                                                                                                                                                                                                                                                                                                                                              |         |         |         |         |         |         |          |          |          |          |          |          |          |          |          |          |          |          |          |          |          |          |          |          |          |          |          |          |          |          |          |          |          |          |          |          |          |          |          |          |          |          |          |          |          |          |          |          |
|--------------------------------------------------------------------------------------------------------------------------------------------------------------------------------------------------------------------------------------------------------------------------------------------------------------------------------------------------------------------------------------------------------------------------------------------------------------------------------------------------------------------------------------------------------------------------------------------------------------------------------------------------------------------------------------------------------------------------------------------------------|-------------------------------------------------------------------------------------|--------------------------------------------------------------------------------------|----------|---|---|---|---------|---------|----------|---|---------|---------|----------|---|---------|--------|---------|---|---------|---------|----------|---|---------|---------|----------|---|---------|---------|----------|---|---------|----------|----------|------------------------------------------------------------------------------------------------------------------------------------------------------------------------------------------------------------------------------------------------------------------------------------------------------------------------------------------------------------------------------------------------------------------------------------------------------------------------------------------------------------------------------------------------------------------------------------------------------------------------------------------------------------------------------------------------------------------------------------------------------------------------------------------------------------------------------------------------------------------------------------------------------------------------------------------------------------------------------------------------------------------------------------------------------------------------------------------------------------------------------------------------------------------------------|---------|---------|---------|---------|---------|---------|----------|----------|----------|----------|----------|----------|----------|----------|----------|----------|----------|----------|----------|----------|----------|----------|----------|----------|----------|----------|----------|----------|----------|----------|----------|----------|----------|----------|----------|----------|----------|----------|----------|----------|----------|----------|----------|----------|----------|----------|----------|----------|
| I1 <sub>MLC</sub>                                                                                                                                                                                                                                                                                                                                                                                                                                                                                                                                                                                                                                                                                                                                      | 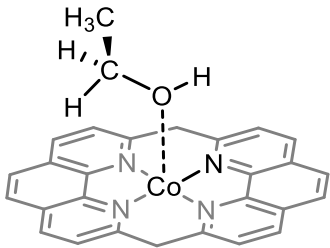 |  |          |   |   |   |         |         |          |   |         |         |          |   |         |        |         |   |         |         |          |   |         |         |          |   |         |         |          |   |         |          |          |                                                                                                                                                                                                                                                                                                                                                                                                                                                                                                                                                                                                                                                                                                                                                                                                                                                                                                                                                                                                                                                                                                                                                                              |         |         |         |         |         |         |          |          |          |          |          |          |          |          |          |          |          |          |          |          |          |          |          |          |          |          |          |          |          |          |          |          |          |          |          |          |          |          |          |          |          |          |          |          |          |          |          |          |
| <p style="text-align: center;"><b>Cartesian coordinate</b></p> <p>-----</p> <table border="1"> <thead> <tr> <th>Atoms</th> <th>X</th> <th>Y</th> <th>Z</th> </tr> </thead> <tbody> <tr> <td>C</td> <td>2.42045</td> <td>3.52614</td> <td>-0.15707</td> </tr> <tr> <td>C</td> <td>3.65098</td> <td>2.95293</td> <td>-0.23736</td> </tr> <tr> <td>C</td> <td>3.77933</td> <td>1.5289</td> <td>-0.3343</td> </tr> <tr> <td>C</td> <td>2.57614</td> <td>0.80905</td> <td>-0.34714</td> </tr> <tr> <td>C</td> <td>1.21443</td> <td>2.73089</td> <td>-0.16835</td> </tr> <tr> <td>C</td> <td>4.99524</td> <td>0.80923</td> <td>-0.41948</td> </tr> <tr> <td>C</td> <td>2.58457</td> <td>-0.60833</td> <td>-0.43867</td> </tr> </tbody> </table> <p>-----</p> |                                                                                     | Atoms                                                                                | X        | Y | Z | C | 2.42045 | 3.52614 | -0.15707 | C | 3.65098 | 2.95293 | -0.23736 | C | 3.77933 | 1.5289 | -0.3343 | C | 2.57614 | 0.80905 | -0.34714 | C | 1.21443 | 2.73089 | -0.16835 | C | 4.99524 | 0.80923 | -0.41948 | C | 2.58457 | -0.60833 | -0.43867 | <p style="text-align: center;"><b>Frequencies</b></p> <table border="1"> <tbody> <tr> <td>26.9069</td> <td>47.8395</td> <td>55.9897</td> </tr> <tr> <td>63.3606</td> <td>90.3622</td> <td>94.7301</td> </tr> <tr> <td>119.4298</td> <td>129.2714</td> <td>160.9827</td> </tr> <tr> <td>173.2442</td> <td>182.6471</td> <td>207.6631</td> </tr> <tr> <td>214.2182</td> <td>248.3156</td> <td>252.9137</td> </tr> <tr> <td>254.9044</td> <td>255.2832</td> <td>273.1618</td> </tr> <tr> <td>275.5314</td> <td>294.9600</td> <td>312.7221</td> </tr> <tr> <td>334.7043</td> <td>343.1989</td> <td>353.2920</td> </tr> <tr> <td>384.5808</td> <td>406.9965</td> <td>408.6448</td> </tr> <tr> <td>410.6131</td> <td>447.5699</td> <td>455.2321</td> </tr> <tr> <td>460.6829</td> <td>486.2095</td> <td>487.0598</td> </tr> <tr> <td>488.6215</td> <td>492.6474</td> <td>495.6068</td> </tr> <tr> <td>541.0466</td> <td>541.6933</td> <td>556.5407</td> </tr> <tr> <td>579.7173</td> <td>584.3679</td> <td>586.6097</td> </tr> <tr> <td>587.3271</td> <td>594.5713</td> <td>597.9705</td> </tr> <tr> <td>623.3227</td> <td>678.2511</td> <td>686.1919</td> </tr> </tbody> </table> | 26.9069 | 47.8395 | 55.9897 | 63.3606 | 90.3622 | 94.7301 | 119.4298 | 129.2714 | 160.9827 | 173.2442 | 182.6471 | 207.6631 | 214.2182 | 248.3156 | 252.9137 | 254.9044 | 255.2832 | 273.1618 | 275.5314 | 294.9600 | 312.7221 | 334.7043 | 343.1989 | 353.2920 | 384.5808 | 406.9965 | 408.6448 | 410.6131 | 447.5699 | 455.2321 | 460.6829 | 486.2095 | 487.0598 | 488.6215 | 492.6474 | 495.6068 | 541.0466 | 541.6933 | 556.5407 | 579.7173 | 584.3679 | 586.6097 | 587.3271 | 594.5713 | 597.9705 | 623.3227 | 678.2511 | 686.1919 |
| Atoms                                                                                                                                                                                                                                                                                                                                                                                                                                                                                                                                                                                                                                                                                                                                                  | X                                                                                   | Y                                                                                    | Z        |   |   |   |         |         |          |   |         |         |          |   |         |        |         |   |         |         |          |   |         |         |          |   |         |         |          |   |         |          |          |                                                                                                                                                                                                                                                                                                                                                                                                                                                                                                                                                                                                                                                                                                                                                                                                                                                                                                                                                                                                                                                                                                                                                                              |         |         |         |         |         |         |          |          |          |          |          |          |          |          |          |          |          |          |          |          |          |          |          |          |          |          |          |          |          |          |          |          |          |          |          |          |          |          |          |          |          |          |          |          |          |          |          |          |
| C                                                                                                                                                                                                                                                                                                                                                                                                                                                                                                                                                                                                                                                                                                                                                      | 2.42045                                                                             | 3.52614                                                                              | -0.15707 |   |   |   |         |         |          |   |         |         |          |   |         |        |         |   |         |         |          |   |         |         |          |   |         |         |          |   |         |          |          |                                                                                                                                                                                                                                                                                                                                                                                                                                                                                                                                                                                                                                                                                                                                                                                                                                                                                                                                                                                                                                                                                                                                                                              |         |         |         |         |         |         |          |          |          |          |          |          |          |          |          |          |          |          |          |          |          |          |          |          |          |          |          |          |          |          |          |          |          |          |          |          |          |          |          |          |          |          |          |          |          |          |          |          |
| C                                                                                                                                                                                                                                                                                                                                                                                                                                                                                                                                                                                                                                                                                                                                                      | 3.65098                                                                             | 2.95293                                                                              | -0.23736 |   |   |   |         |         |          |   |         |         |          |   |         |        |         |   |         |         |          |   |         |         |          |   |         |         |          |   |         |          |          |                                                                                                                                                                                                                                                                                                                                                                                                                                                                                                                                                                                                                                                                                                                                                                                                                                                                                                                                                                                                                                                                                                                                                                              |         |         |         |         |         |         |          |          |          |          |          |          |          |          |          |          |          |          |          |          |          |          |          |          |          |          |          |          |          |          |          |          |          |          |          |          |          |          |          |          |          |          |          |          |          |          |          |          |
| C                                                                                                                                                                                                                                                                                                                                                                                                                                                                                                                                                                                                                                                                                                                                                      | 3.77933                                                                             | 1.5289                                                                               | -0.3343  |   |   |   |         |         |          |   |         |         |          |   |         |        |         |   |         |         |          |   |         |         |          |   |         |         |          |   |         |          |          |                                                                                                                                                                                                                                                                                                                                                                                                                                                                                                                                                                                                                                                                                                                                                                                                                                                                                                                                                                                                                                                                                                                                                                              |         |         |         |         |         |         |          |          |          |          |          |          |          |          |          |          |          |          |          |          |          |          |          |          |          |          |          |          |          |          |          |          |          |          |          |          |          |          |          |          |          |          |          |          |          |          |          |          |
| C                                                                                                                                                                                                                                                                                                                                                                                                                                                                                                                                                                                                                                                                                                                                                      | 2.57614                                                                             | 0.80905                                                                              | -0.34714 |   |   |   |         |         |          |   |         |         |          |   |         |        |         |   |         |         |          |   |         |         |          |   |         |         |          |   |         |          |          |                                                                                                                                                                                                                                                                                                                                                                                                                                                                                                                                                                                                                                                                                                                                                                                                                                                                                                                                                                                                                                                                                                                                                                              |         |         |         |         |         |         |          |          |          |          |          |          |          |          |          |          |          |          |          |          |          |          |          |          |          |          |          |          |          |          |          |          |          |          |          |          |          |          |          |          |          |          |          |          |          |          |          |          |
| C                                                                                                                                                                                                                                                                                                                                                                                                                                                                                                                                                                                                                                                                                                                                                      | 1.21443                                                                             | 2.73089                                                                              | -0.16835 |   |   |   |         |         |          |   |         |         |          |   |         |        |         |   |         |         |          |   |         |         |          |   |         |         |          |   |         |          |          |                                                                                                                                                                                                                                                                                                                                                                                                                                                                                                                                                                                                                                                                                                                                                                                                                                                                                                                                                                                                                                                                                                                                                                              |         |         |         |         |         |         |          |          |          |          |          |          |          |          |          |          |          |          |          |          |          |          |          |          |          |          |          |          |          |          |          |          |          |          |          |          |          |          |          |          |          |          |          |          |          |          |          |          |
| C                                                                                                                                                                                                                                                                                                                                                                                                                                                                                                                                                                                                                                                                                                                                                      | 4.99524                                                                             | 0.80923                                                                              | -0.41948 |   |   |   |         |         |          |   |         |         |          |   |         |        |         |   |         |         |          |   |         |         |          |   |         |         |          |   |         |          |          |                                                                                                                                                                                                                                                                                                                                                                                                                                                                                                                                                                                                                                                                                                                                                                                                                                                                                                                                                                                                                                                                                                                                                                              |         |         |         |         |         |         |          |          |          |          |          |          |          |          |          |          |          |          |          |          |          |          |          |          |          |          |          |          |          |          |          |          |          |          |          |          |          |          |          |          |          |          |          |          |          |          |          |          |
| C                                                                                                                                                                                                                                                                                                                                                                                                                                                                                                                                                                                                                                                                                                                                                      | 2.58457                                                                             | -0.60833                                                                             | -0.43867 |   |   |   |         |         |          |   |         |         |          |   |         |        |         |   |         |         |          |   |         |         |          |   |         |         |          |   |         |          |          |                                                                                                                                                                                                                                                                                                                                                                                                                                                                                                                                                                                                                                                                                                                                                                                                                                                                                                                                                                                                                                                                                                                                                                              |         |         |         |         |         |         |          |          |          |          |          |          |          |          |          |          |          |          |          |          |          |          |          |          |          |          |          |          |          |          |          |          |          |          |          |          |          |          |          |          |          |          |          |          |          |          |          |          |
| 26.9069                                                                                                                                                                                                                                                                                                                                                                                                                                                                                                                                                                                                                                                                                                                                                | 47.8395                                                                             | 55.9897                                                                              |          |   |   |   |         |         |          |   |         |         |          |   |         |        |         |   |         |         |          |   |         |         |          |   |         |         |          |   |         |          |          |                                                                                                                                                                                                                                                                                                                                                                                                                                                                                                                                                                                                                                                                                                                                                                                                                                                                                                                                                                                                                                                                                                                                                                              |         |         |         |         |         |         |          |          |          |          |          |          |          |          |          |          |          |          |          |          |          |          |          |          |          |          |          |          |          |          |          |          |          |          |          |          |          |          |          |          |          |          |          |          |          |          |          |          |
| 63.3606                                                                                                                                                                                                                                                                                                                                                                                                                                                                                                                                                                                                                                                                                                                                                | 90.3622                                                                             | 94.7301                                                                              |          |   |   |   |         |         |          |   |         |         |          |   |         |        |         |   |         |         |          |   |         |         |          |   |         |         |          |   |         |          |          |                                                                                                                                                                                                                                                                                                                                                                                                                                                                                                                                                                                                                                                                                                                                                                                                                                                                                                                                                                                                                                                                                                                                                                              |         |         |         |         |         |         |          |          |          |          |          |          |          |          |          |          |          |          |          |          |          |          |          |          |          |          |          |          |          |          |          |          |          |          |          |          |          |          |          |          |          |          |          |          |          |          |          |          |
| 119.4298                                                                                                                                                                                                                                                                                                                                                                                                                                                                                                                                                                                                                                                                                                                                               | 129.2714                                                                            | 160.9827                                                                             |          |   |   |   |         |         |          |   |         |         |          |   |         |        |         |   |         |         |          |   |         |         |          |   |         |         |          |   |         |          |          |                                                                                                                                                                                                                                                                                                                                                                                                                                                                                                                                                                                                                                                                                                                                                                                                                                                                                                                                                                                                                                                                                                                                                                              |         |         |         |         |         |         |          |          |          |          |          |          |          |          |          |          |          |          |          |          |          |          |          |          |          |          |          |          |          |          |          |          |          |          |          |          |          |          |          |          |          |          |          |          |          |          |          |          |
| 173.2442                                                                                                                                                                                                                                                                                                                                                                                                                                                                                                                                                                                                                                                                                                                                               | 182.6471                                                                            | 207.6631                                                                             |          |   |   |   |         |         |          |   |         |         |          |   |         |        |         |   |         |         |          |   |         |         |          |   |         |         |          |   |         |          |          |                                                                                                                                                                                                                                                                                                                                                                                                                                                                                                                                                                                                                                                                                                                                                                                                                                                                                                                                                                                                                                                                                                                                                                              |         |         |         |         |         |         |          |          |          |          |          |          |          |          |          |          |          |          |          |          |          |          |          |          |          |          |          |          |          |          |          |          |          |          |          |          |          |          |          |          |          |          |          |          |          |          |          |          |
| 214.2182                                                                                                                                                                                                                                                                                                                                                                                                                                                                                                                                                                                                                                                                                                                                               | 248.3156                                                                            | 252.9137                                                                             |          |   |   |   |         |         |          |   |         |         |          |   |         |        |         |   |         |         |          |   |         |         |          |   |         |         |          |   |         |          |          |                                                                                                                                                                                                                                                                                                                                                                                                                                                                                                                                                                                                                                                                                                                                                                                                                                                                                                                                                                                                                                                                                                                                                                              |         |         |         |         |         |         |          |          |          |          |          |          |          |          |          |          |          |          |          |          |          |          |          |          |          |          |          |          |          |          |          |          |          |          |          |          |          |          |          |          |          |          |          |          |          |          |          |          |
| 254.9044                                                                                                                                                                                                                                                                                                                                                                                                                                                                                                                                                                                                                                                                                                                                               | 255.2832                                                                            | 273.1618                                                                             |          |   |   |   |         |         |          |   |         |         |          |   |         |        |         |   |         |         |          |   |         |         |          |   |         |         |          |   |         |          |          |                                                                                                                                                                                                                                                                                                                                                                                                                                                                                                                                                                                                                                                                                                                                                                                                                                                                                                                                                                                                                                                                                                                                                                              |         |         |         |         |         |         |          |          |          |          |          |          |          |          |          |          |          |          |          |          |          |          |          |          |          |          |          |          |          |          |          |          |          |          |          |          |          |          |          |          |          |          |          |          |          |          |          |          |
| 275.5314                                                                                                                                                                                                                                                                                                                                                                                                                                                                                                                                                                                                                                                                                                                                               | 294.9600                                                                            | 312.7221                                                                             |          |   |   |   |         |         |          |   |         |         |          |   |         |        |         |   |         |         |          |   |         |         |          |   |         |         |          |   |         |          |          |                                                                                                                                                                                                                                                                                                                                                                                                                                                                                                                                                                                                                                                                                                                                                                                                                                                                                                                                                                                                                                                                                                                                                                              |         |         |         |         |         |         |          |          |          |          |          |          |          |          |          |          |          |          |          |          |          |          |          |          |          |          |          |          |          |          |          |          |          |          |          |          |          |          |          |          |          |          |          |          |          |          |          |          |
| 334.7043                                                                                                                                                                                                                                                                                                                                                                                                                                                                                                                                                                                                                                                                                                                                               | 343.1989                                                                            | 353.2920                                                                             |          |   |   |   |         |         |          |   |         |         |          |   |         |        |         |   |         |         |          |   |         |         |          |   |         |         |          |   |         |          |          |                                                                                                                                                                                                                                                                                                                                                                                                                                                                                                                                                                                                                                                                                                                                                                                                                                                                                                                                                                                                                                                                                                                                                                              |         |         |         |         |         |         |          |          |          |          |          |          |          |          |          |          |          |          |          |          |          |          |          |          |          |          |          |          |          |          |          |          |          |          |          |          |          |          |          |          |          |          |          |          |          |          |          |          |
| 384.5808                                                                                                                                                                                                                                                                                                                                                                                                                                                                                                                                                                                                                                                                                                                                               | 406.9965                                                                            | 408.6448                                                                             |          |   |   |   |         |         |          |   |         |         |          |   |         |        |         |   |         |         |          |   |         |         |          |   |         |         |          |   |         |          |          |                                                                                                                                                                                                                                                                                                                                                                                                                                                                                                                                                                                                                                                                                                                                                                                                                                                                                                                                                                                                                                                                                                                                                                              |         |         |         |         |         |         |          |          |          |          |          |          |          |          |          |          |          |          |          |          |          |          |          |          |          |          |          |          |          |          |          |          |          |          |          |          |          |          |          |          |          |          |          |          |          |          |          |          |
| 410.6131                                                                                                                                                                                                                                                                                                                                                                                                                                                                                                                                                                                                                                                                                                                                               | 447.5699                                                                            | 455.2321                                                                             |          |   |   |   |         |         |          |   |         |         |          |   |         |        |         |   |         |         |          |   |         |         |          |   |         |         |          |   |         |          |          |                                                                                                                                                                                                                                                                                                                                                                                                                                                                                                                                                                                                                                                                                                                                                                                                                                                                                                                                                                                                                                                                                                                                                                              |         |         |         |         |         |         |          |          |          |          |          |          |          |          |          |          |          |          |          |          |          |          |          |          |          |          |          |          |          |          |          |          |          |          |          |          |          |          |          |          |          |          |          |          |          |          |          |          |
| 460.6829                                                                                                                                                                                                                                                                                                                                                                                                                                                                                                                                                                                                                                                                                                                                               | 486.2095                                                                            | 487.0598                                                                             |          |   |   |   |         |         |          |   |         |         |          |   |         |        |         |   |         |         |          |   |         |         |          |   |         |         |          |   |         |          |          |                                                                                                                                                                                                                                                                                                                                                                                                                                                                                                                                                                                                                                                                                                                                                                                                                                                                                                                                                                                                                                                                                                                                                                              |         |         |         |         |         |         |          |          |          |          |          |          |          |          |          |          |          |          |          |          |          |          |          |          |          |          |          |          |          |          |          |          |          |          |          |          |          |          |          |          |          |          |          |          |          |          |          |          |
| 488.6215                                                                                                                                                                                                                                                                                                                                                                                                                                                                                                                                                                                                                                                                                                                                               | 492.6474                                                                            | 495.6068                                                                             |          |   |   |   |         |         |          |   |         |         |          |   |         |        |         |   |         |         |          |   |         |         |          |   |         |         |          |   |         |          |          |                                                                                                                                                                                                                                                                                                                                                                                                                                                                                                                                                                                                                                                                                                                                                                                                                                                                                                                                                                                                                                                                                                                                                                              |         |         |         |         |         |         |          |          |          |          |          |          |          |          |          |          |          |          |          |          |          |          |          |          |          |          |          |          |          |          |          |          |          |          |          |          |          |          |          |          |          |          |          |          |          |          |          |          |
| 541.0466                                                                                                                                                                                                                                                                                                                                                                                                                                                                                                                                                                                                                                                                                                                                               | 541.6933                                                                            | 556.5407                                                                             |          |   |   |   |         |         |          |   |         |         |          |   |         |        |         |   |         |         |          |   |         |         |          |   |         |         |          |   |         |          |          |                                                                                                                                                                                                                                                                                                                                                                                                                                                                                                                                                                                                                                                                                                                                                                                                                                                                                                                                                                                                                                                                                                                                                                              |         |         |         |         |         |         |          |          |          |          |          |          |          |          |          |          |          |          |          |          |          |          |          |          |          |          |          |          |          |          |          |          |          |          |          |          |          |          |          |          |          |          |          |          |          |          |          |          |
| 579.7173                                                                                                                                                                                                                                                                                                                                                                                                                                                                                                                                                                                                                                                                                                                                               | 584.3679                                                                            | 586.6097                                                                             |          |   |   |   |         |         |          |   |         |         |          |   |         |        |         |   |         |         |          |   |         |         |          |   |         |         |          |   |         |          |          |                                                                                                                                                                                                                                                                                                                                                                                                                                                                                                                                                                                                                                                                                                                                                                                                                                                                                                                                                                                                                                                                                                                                                                              |         |         |         |         |         |         |          |          |          |          |          |          |          |          |          |          |          |          |          |          |          |          |          |          |          |          |          |          |          |          |          |          |          |          |          |          |          |          |          |          |          |          |          |          |          |          |          |          |
| 587.3271                                                                                                                                                                                                                                                                                                                                                                                                                                                                                                                                                                                                                                                                                                                                               | 594.5713                                                                            | 597.9705                                                                             |          |   |   |   |         |         |          |   |         |         |          |   |         |        |         |   |         |         |          |   |         |         |          |   |         |         |          |   |         |          |          |                                                                                                                                                                                                                                                                                                                                                                                                                                                                                                                                                                                                                                                                                                                                                                                                                                                                                                                                                                                                                                                                                                                                                                              |         |         |         |         |         |         |          |          |          |          |          |          |          |          |          |          |          |          |          |          |          |          |          |          |          |          |          |          |          |          |          |          |          |          |          |          |          |          |          |          |          |          |          |          |          |          |          |          |
| 623.3227                                                                                                                                                                                                                                                                                                                                                                                                                                                                                                                                                                                                                                                                                                                                               | 678.2511                                                                            | 686.1919                                                                             |          |   |   |   |         |         |          |   |         |         |          |   |         |        |         |   |         |         |          |   |         |         |          |   |         |         |          |   |         |          |          |                                                                                                                                                                                                                                                                                                                                                                                                                                                                                                                                                                                                                                                                                                                                                                                                                                                                                                                                                                                                                                                                                                                                                                              |         |         |         |         |         |         |          |          |          |          |          |          |          |          |          |          |          |          |          |          |          |          |          |          |          |          |          |          |          |          |          |          |          |          |          |          |          |          |          |          |          |          |          |          |          |          |          |          |



|    |          |          |          |           |           |           |
|----|----------|----------|----------|-----------|-----------|-----------|
| C  | 3.79764  | -1.30803 | -0.51149 | 686.7584  | 715.6645  | 716.4481  |
| C  | 5.00416  | -0.56751 | -0.50449 | 718.8304  | 745.9621  | 747.6736  |
| C  | 3.68868  | -2.7346  | -0.59255 | 763.4168  | 767.0974  | 791.2613  |
| H  | 4.59156  | -3.33464 | -0.65555 | 793.9336  | 821.2797  | 822.2796  |
| C  | 2.46532  | -3.32857 | -0.58871 | 826.2571  | 832.6694  | 851.4743  |
| C  | 1.24923  | -2.55353 | -0.50367 | 862.8580  | 863.8911  | 865.2955  |
| H  | 5.93058  | 1.35979  | -0.42001 | 884.2825  | 885.1649  | 896.3315  |
| H  | 2.31474  | 4.60276  | -0.08173 | 907.3625  | 909.0267  | 922.3285  |
| H  | 4.54554  | 3.56831  | -0.22849 | 943.1804  | 950.2278  | 992.1144  |
| H  | 5.94684  | -1.10129 | -0.5718  | 992.4453  | 1009.8314 | 1023.9169 |
| H  | 2.37346  | -4.40747 | -0.64786 | 1025.7198 | 1028.0556 | 1029.8753 |
| N  | 1.34392  | 1.38424  | -0.27793 | 1040.4670 | 1079.6512 | 1101.2464 |
| N  | 1.35904  | -1.20244 | -0.44451 | 1125.3948 | 1133.3507 | 1147.9907 |
| Co | -0.0255  | 0.06687  | -0.11188 | 1148.3144 | 1162.4681 | 1165.7377 |
| C  | -2.63766 | 0.77117  | -0.29701 | 1179.7335 | 1187.4677 | 1191.0890 |
| C  | -1.30452 | 2.71108  | -0.14873 | 1238.7853 | 1244.7738 | 1251.0983 |
| C  | -2.62788 | -0.64749 | -0.37957 | 1254.4930 | 1265.5767 | 1266.2281 |
| C  | -3.85081 | 1.47264  | -0.26012 | 1283.4596 | 1287.9366 | 1304.6472 |
| C  | -2.51911 | 3.48925  | -0.1134  | 1307.9333 | 1337.9583 | 1369.4294 |
| C  | -3.83144 | -1.36461 | -0.43026 | 1391.9511 | 1400.8360 | 1415.0790 |
| C  | -5.05863 | 0.73434  | -0.3193  | 1420.7092 | 1429.1647 | 1431.1828 |
| C  | -3.743   | 2.89723  | -0.16895 | 1444.0940 | 1449.2134 | 1460.1518 |
| H  | -2.42788 | 4.56719  | -0.03857 | 1464.9166 | 1465.6368 | 1470.0044 |
| C  | -3.70459 | -2.7879  | -0.51271 | 1479.3743 | 1485.0064 | 1496.7882 |
| C  | -5.04928 | -0.64125 | -0.40233 | 1500.4396 | 1508.8058 | 1515.6642 |
| C  | -1.26888 | -2.57278 | -0.46967 | 1520.0271 | 1530.7743 | 1554.7111 |
| H  | -6.00156 | 1.27154  | -0.30172 | 1576.2170 | 1583.2033 | 1624.1229 |
| H  | -4.64639 | 3.49908  | -0.1423  | 1628.0655 | 1660.0225 | 1673.0654 |
| C  | -2.47267 | -3.36572 | -0.53145 | 1698.8236 | 1701.4656 | 1705.8268 |
| H  | -4.59997 | -3.40053 | -0.5586  | 1717.4608 | 3074.9482 | 3083.9933 |
| H  | -5.98486 | -1.18935 | -0.45056 | 3148.8662 | 3165.6914 | 3178.7246 |
| H  | -2.36669 | -4.44316 | -0.59269 | 3211.9626 | 3213.0428 | 3222.8350 |
| N  | -1.41521 | 1.36573  | -0.2615  | 3225.9001 | 3226.6142 | 3226.6704 |
|    |          |          |          | 3228.9681 | 3229.1102 | 3230.8111 |
|    |          |          |          | 3233.9235 | 3241.9186 | 3242.9249 |
|    |          |          |          | 3244.8313 | 3245.9007 | 3845.5872 |

|   |          |          |          |
|---|----------|----------|----------|
| N | -1.39701 | -1.22576 | -0.40593 |
| O | -0.07866 | 0.01952  | 1.85916  |
| C | 0.52584  | -1.09621 | 2.55894  |
| H | 0.09711  | -1.98296 | 2.08569  |
| H | 1.60609  | -1.08884 | 2.37434  |
| C | -0.0475  | 3.34205  | -0.07622 |
| H | -0.05502 | 4.42202  | 0.01436  |
| C | -0.003   | -3.19033 | -0.48454 |
| H | 0.00477  | -4.27308 | -0.53334 |
| H | 0.23506  | 0.85522  | 2.23468  |
| C | 0.19467  | -1.0246  | 4.03301  |
| H | 0.61191  | -0.12187 | 4.48955  |
| H | -0.88598 | -1.03169 | 4.18675  |
| H | 0.62682  | -1.88572 | 4.54789  |

### Statistical Thermodynamic Analysis

Temperature = 403.15 K

Pressure = 1 atm

Zero-point correction = 0.426341

Electronic Energy = -1517.69317386

Internal Energy (E) = -1517.22187286

Enthalpy (H) = -1517.22059586

Gibbs Free Energy (G) = -1517.34955186

Gibbs Free Energy of Solvation = -1517.40472741

| St. Point          | General Structure                                                                                                                                                                                                                                                                                                                                                    | Ball & Stick model |          |   |   |   |         |         |          |   |         |        |          |                                                                                                                                                                                                                                                                                                                                                                                                                                                                                                                                           |           |         |         |         |         |         |          |          |          |          |          |          |          |          |          |          |          |          |          |          |          |
|--------------------|----------------------------------------------------------------------------------------------------------------------------------------------------------------------------------------------------------------------------------------------------------------------------------------------------------------------------------------------------------------------|--------------------|----------|---|---|---|---------|---------|----------|---|---------|--------|----------|-------------------------------------------------------------------------------------------------------------------------------------------------------------------------------------------------------------------------------------------------------------------------------------------------------------------------------------------------------------------------------------------------------------------------------------------------------------------------------------------------------------------------------------------|-----------|---------|---------|---------|---------|---------|----------|----------|----------|----------|----------|----------|----------|----------|----------|----------|----------|----------|----------|----------|----------|
| TS1 <sub>MLC</sub> |                                                                                                                                                                                                                                                                                                                                                                      |                    |          |   |   |   |         |         |          |   |         |        |          |                                                                                                                                                                                                                                                                                                                                                                                                                                                                                                                                           |           |         |         |         |         |         |          |          |          |          |          |          |          |          |          |          |          |          |          |          |          |
|                    | <p style="text-align: center;"><b>Cartesian coordinate</b></p> <p>-----</p> <table border="1"> <thead> <tr> <th>Atoms</th> <th>X</th> <th>Y</th> <th>Z</th> </tr> </thead> <tbody> <tr> <td>C</td> <td>2.47214</td> <td>3.50404</td> <td>-0.24889</td> </tr> <tr> <td>C</td> <td>3.68318</td> <td>2.9018</td> <td>-0.29408</td> </tr> </tbody> </table> <p>-----</p> | Atoms              | X        | Y | Z | C | 2.47214 | 3.50404 | -0.24889 | C | 3.68318 | 2.9018 | -0.29408 | <p style="text-align: center;"><b>Frequencies</b></p> <table border="1"> <tbody> <tr><td>-491.0748</td><td>44.9927</td><td>51.5402</td></tr> <tr><td>62.8253</td><td>70.0469</td><td>94.0549</td></tr> <tr><td>113.6647</td><td>127.9371</td><td>159.3376</td></tr> <tr><td>163.9387</td><td>210.5636</td><td>213.7695</td></tr> <tr><td>220.7964</td><td>242.5285</td><td>252.2019</td></tr> <tr><td>253.2344</td><td>257.3910</td><td>271.8173</td></tr> <tr><td>279.1342</td><td>297.6389</td><td>322.0262</td></tr> </tbody> </table> | -491.0748 | 44.9927 | 51.5402 | 62.8253 | 70.0469 | 94.0549 | 113.6647 | 127.9371 | 159.3376 | 163.9387 | 210.5636 | 213.7695 | 220.7964 | 242.5285 | 252.2019 | 253.2344 | 257.3910 | 271.8173 | 279.1342 | 297.6389 | 322.0262 |
| Atoms              | X                                                                                                                                                                                                                                                                                                                                                                    | Y                  | Z        |   |   |   |         |         |          |   |         |        |          |                                                                                                                                                                                                                                                                                                                                                                                                                                                                                                                                           |           |         |         |         |         |         |          |          |          |          |          |          |          |          |          |          |          |          |          |          |          |
| C                  | 2.47214                                                                                                                                                                                                                                                                                                                                                              | 3.50404            | -0.24889 |   |   |   |         |         |          |   |         |        |          |                                                                                                                                                                                                                                                                                                                                                                                                                                                                                                                                           |           |         |         |         |         |         |          |          |          |          |          |          |          |          |          |          |          |          |          |          |          |
| C                  | 3.68318                                                                                                                                                                                                                                                                                                                                                              | 2.9018             | -0.29408 |   |   |   |         |         |          |   |         |        |          |                                                                                                                                                                                                                                                                                                                                                                                                                                                                                                                                           |           |         |         |         |         |         |          |          |          |          |          |          |          |          |          |          |          |          |          |          |          |
| -491.0748          | 44.9927                                                                                                                                                                                                                                                                                                                                                              | 51.5402            |          |   |   |   |         |         |          |   |         |        |          |                                                                                                                                                                                                                                                                                                                                                                                                                                                                                                                                           |           |         |         |         |         |         |          |          |          |          |          |          |          |          |          |          |          |          |          |          |          |
| 62.8253            | 70.0469                                                                                                                                                                                                                                                                                                                                                              | 94.0549            |          |   |   |   |         |         |          |   |         |        |          |                                                                                                                                                                                                                                                                                                                                                                                                                                                                                                                                           |           |         |         |         |         |         |          |          |          |          |          |          |          |          |          |          |          |          |          |          |          |
| 113.6647           | 127.9371                                                                                                                                                                                                                                                                                                                                                             | 159.3376           |          |   |   |   |         |         |          |   |         |        |          |                                                                                                                                                                                                                                                                                                                                                                                                                                                                                                                                           |           |         |         |         |         |         |          |          |          |          |          |          |          |          |          |          |          |          |          |          |          |
| 163.9387           | 210.5636                                                                                                                                                                                                                                                                                                                                                             | 213.7695           |          |   |   |   |         |         |          |   |         |        |          |                                                                                                                                                                                                                                                                                                                                                                                                                                                                                                                                           |           |         |         |         |         |         |          |          |          |          |          |          |          |          |          |          |          |          |          |          |          |
| 220.7964           | 242.5285                                                                                                                                                                                                                                                                                                                                                             | 252.2019           |          |   |   |   |         |         |          |   |         |        |          |                                                                                                                                                                                                                                                                                                                                                                                                                                                                                                                                           |           |         |         |         |         |         |          |          |          |          |          |          |          |          |          |          |          |          |          |          |          |
| 253.2344           | 257.3910                                                                                                                                                                                                                                                                                                                                                             | 271.8173           |          |   |   |   |         |         |          |   |         |        |          |                                                                                                                                                                                                                                                                                                                                                                                                                                                                                                                                           |           |         |         |         |         |         |          |          |          |          |          |          |          |          |          |          |          |          |          |          |          |
| 279.1342           | 297.6389                                                                                                                                                                                                                                                                                                                                                             | 322.0262           |          |   |   |   |         |         |          |   |         |        |          |                                                                                                                                                                                                                                                                                                                                                                                                                                                                                                                                           |           |         |         |         |         |         |          |          |          |          |          |          |          |          |          |          |          |          |          |          |          |

|    |          |          |          |           |           |           |
|----|----------|----------|----------|-----------|-----------|-----------|
| C  | 3.80672  | 1.45351  | -0.3211  | 336.8191  | 346.3038  | 349.1275  |
| C  | 2.62879  | 0.7354   | -0.21314 | 386.1981  | 399.1407  | 403.7877  |
| C  | 1.23461  | 2.74681  | -0.16121 | 411.2154  | 444.9578  | 453.9754  |
| C  | 5.01041  | 0.73072  | -0.49418 | 469.5332  | 476.1675  | 482.1740  |
| C  | 2.59119  | -0.65874 | -0.34856 | 486.4392  | 491.4827  | 497.2441  |
| C  | 3.79039  | -1.37466 | -0.47905 | 538.9705  | 549.4366  | 575.3480  |
| C  | 5.0015   | -0.64878 | -0.54851 | 578.9817  | 588.4550  | 595.6707  |
| C  | 3.66302  | -2.80265 | -0.55026 | 598.4126  | 600.9950  | 620.5088  |
| H  | 4.55786  | -3.41109 | -0.64084 | 657.3699  | 680.5948  | 687.4683  |
| C  | 2.4377   | -3.38476 | -0.49521 | 694.2124  | 714.1347  | 715.8364  |
| C  | 1.22525  | -2.59973 | -0.39853 | 722.5252  | 745.5437  | 753.8112  |
| H  | 5.94563  | 1.27388  | -0.58314 | 760.2971  | 764.7071  | 783.6736  |
| H  | 2.38989  | 4.58446  | -0.29547 | 795.0081  | 816.5443  | 824.6253  |
| H  | 4.58586  | 3.50165  | -0.35718 | 826.3734  | 832.9875  | 851.1275  |
| H  | 5.93284  | -1.19326 | -0.66733 | 855.7326  | 862.8708  | 865.4404  |
| H  | 2.33431  | -4.46328 | -0.53474 | 881.2042  | 886.2388  | 895.7849  |
| N  | 1.38181  | 1.35645  | 0.04485  | 902.8532  | 916.6682  | 929.3797  |
| N  | 1.34433  | -1.25053 | -0.36458 | 946.9239  | 953.8886  | 988.3785  |
| Co | -0.04079 | 0.00135  | -0.12664 | 998.8949  | 1001.0131 | 1020.6742 |
| C  | -2.64005 | 0.75796  | -0.30234 | 1022.7650 | 1027.5533 | 1033.1827 |
| C  | -1.29293 | 2.67977  | -0.22691 | 1038.4732 | 1099.3066 | 1115.7732 |
| C  | -2.63886 | -0.66339 | -0.34094 | 1127.5357 | 1142.3852 | 1148.5968 |
| C  | -3.84461 | 1.47247  | -0.30917 | 1159.2917 | 1174.6699 | 1181.9426 |
| C  | -2.48209 | 3.47163  | -0.23266 | 1184.4390 | 1185.7441 | 1191.0385 |
| C  | -3.83907 | -1.36708 | -0.39658 | 1227.5162 | 1244.2107 | 1246.3394 |
| C  | -5.06716 | 0.73929  | -0.36235 | 1248.8670 | 1260.2507 | 1261.1774 |
| C  | -3.7209  | 2.88709  | -0.27026 | 1273.9742 | 1279.8847 | 1299.9716 |
| H  | -2.38207 | 4.55053  | -0.20162 | 1314.6613 | 1328.3930 | 1350.1050 |
| C  | -3.72535 | -2.79575 | -0.43343 | 1391.2200 | 1400.9583 | 1415.3406 |
| C  | -5.06095 | -0.63029 | -0.40492 | 1420.5853 | 1425.8011 | 1431.3503 |
| C  | -1.28552 | -2.609   | -0.36133 | 1445.4386 | 1450.5681 | 1457.0329 |
| H  | -6.00505 | 1.28473  | -0.37192 | 1460.2832 | 1475.5999 | 1481.1184 |
| H  | -4.61539 | 3.5029   | -0.27056 | 1485.0744 | 1496.9248 | 1508.9162 |
|    |          |          |          | 1509.8453 | 1525.9334 | 1531.0899 |
|    |          |          |          | 1535.9675 | 1548.8839 | 1569.7074 |
|    |          |          |          | 1578.8896 | 1618.3327 | 1637.1828 |
|    |          |          |          | 1653.8501 | 1674.1611 | 1691.3697 |
|    |          |          |          | 1702.5312 | 1705.4017 | 1715.7942 |
|    |          |          |          | 1726.9570 | 1880.9654 | 3041.3487 |
|    |          |          |          | 3081.8958 | 3091.6948 | 3169.2147 |
|    |          |          |          | 3175.3325 | 3212.8066 | 3215.3451 |
|    |          |          |          | 3218.6329 | 3224.6507 | 3226.3540 |
|    |          |          |          | 3226.7241 | 3228.1929 | 3229.4186 |
|    |          |          |          | 3233.7395 | 3234.1548 | 3241.2360 |
|    |          |          |          | 3241.4528 | 3243.1463 | 3246.8826 |

|   |          |          |          |
|---|----------|----------|----------|
| C | -2.50091 | -3.38748 | -0.41663 |
| H | -4.6263  | -3.40034 | -0.47392 |
| H | -5.99698 | -1.1783  | -0.44493 |
| H | -2.4069  | -4.46728 | -0.44444 |
| N | -1.41664 | 1.34828  | -0.27149 |
| N | -1.40909 | -1.26094 | -0.32527 |
| O | 0.0313   | 0.25829  | 1.7054   |
| C | 0.42304  | -0.85876 | 2.49538  |
| H | -0.10947 | -1.75656 | 2.15233  |
| H | 1.50083  | -1.04813 | 2.38796  |
| C | 0.00099  | 3.32953  | -0.20279 |
| H | -0.02211 | 4.4127   | -0.24522 |
| C | -0.02703 | -3.23518 | -0.36293 |
| H | -0.02377 | -4.31788 | -0.39423 |
| H | 1.02601  | 1.07894  | 1.1007   |
| C | 0.07339  | -0.55488 | 3.94204  |
| H | 0.60068  | 0.33858  | 4.28356  |
| H | -1.00048 | -0.38628 | 4.04429  |
| H | 0.3614   | -1.39492 | 4.57937  |

### Statistical Thermodynamic Analysis

Temperature = 403.15 K

Pressure = 1 atm

Zero-point correction = 0.422434

Electronic Energy = -1517.64298742

Internal Energy (E) = -1517.17689042

Enthalpy (H) = -1517.17561342

Gibbs Free Energy (G) = -1517.30055442

Gibbs Free Energy of Solvation = -1517.35591974

| St. Point         | General Structure | Ball & Stick model |
|-------------------|-------------------|--------------------|
| I2 <sub>MLC</sub> |                   |                    |

| Cartesian coordinate |          |          |          | Frequencies |           |           |
|----------------------|----------|----------|----------|-------------|-----------|-----------|
| Atoms                | X        | Y        | Z        |             |           |           |
|                      |          |          |          | 45.6291     | 52.0657   | 61.3413   |
|                      |          |          |          | 70.7177     | 95.2555   | 101.8566  |
|                      |          |          |          | 125.4697    | 150.3844  | 161.2192  |
|                      |          |          |          | 201.0247    | 209.1187  | 214.3410  |
| C                    | 2.53906  | 3.51767  | -0.18831 | 223.0085    | 242.3295  | 248.2169  |
| C                    | 3.74282  | 2.9044   | -0.21472 | 253.2277    | 267.5305  | 275.3698  |
| C                    | 3.85225  | 1.4506   | -0.24198 | 293.2668    | 308.5214  | 325.1853  |
| C                    | 2.67907  | 0.73338  | -0.10879 | 336.9462    | 343.7421  | 353.6238  |
| C                    | 1.29185  | 2.7736   | -0.09769 | 381.0793    | 396.4399  | 404.9290  |
| C                    | 5.04608  | 0.72864  | -0.46731 | 412.9313    | 448.6113  | 452.1819  |
| C                    | 2.62148  | -0.6525  | -0.27919 | 461.2986    | 477.7629  | 482.3426  |
| C                    | 3.81401  | -1.37033 | -0.46964 | 484.4714    | 490.7069  | 507.9662  |
| C                    | 5.02531  | -0.65019 | -0.55305 | 536.2247    | 550.9550  | 567.0044  |
| C                    | 3.67769  | -2.7947  | -0.59164 | 583.4337    | 588.3446  | 593.5570  |
| H                    | 4.56816  | -3.40295 | -0.71926 | 600.4676    | 619.7382  | 653.6330  |
| C                    | 2.44995  | -3.37072 | -0.55007 | 670.3900    | 679.9190  | 689.4738  |
| C                    | 1.24228  | -2.58203 | -0.41512 | 708.2268    | 710.7482  | 718.4901  |
| H                    | 5.9807   | 1.26888  | -0.57638 | 724.4277    | 744.0048  | 758.8174  |
| H                    | 2.46638  | 4.59779  | -0.25705 | 764.0992    | 774.1669  | 787.5950  |
| H                    | 4.65214  | 3.49336  | -0.28145 | 812.5651    | 824.3850  | 831.1091  |
| H                    | 5.94927  | -1.19671 | -0.7143  | 832.2180    | 845.3061  | 849.9695  |
| H                    | 2.33877  | -4.44551 | -0.63998 | 860.8619    | 863.7925  | 876.4844  |
| N                    | 1.42859  | 1.37301  | 0.20615  | 880.7716    | 884.1641  | 914.1749  |
| N                    | 1.37248  | -1.23907 | -0.29098 | 915.1072    | 924.8032  | 943.1715  |
| Co                   | -0.00816 | 0.01666  | -0.04631 | 951.9960    | 975.5430  | 988.4840  |
| C                    | -2.59714 | 0.80496  | -0.30551 | 1000.8250   | 1003.4063 | 1017.2025 |
| C                    | -1.24527 | 2.71238  | -0.20229 | 1019.5465   | 1023.6257 | 1031.8831 |
| C                    | -2.60327 | -0.61784 | -0.38542 | 1034.2564   | 1089.0501 | 1109.6828 |
| C                    | -3.79674 | 1.53174  | -0.34285 | 1124.6340   | 1145.6593 | 1157.0158 |
| C                    | -2.41771 | 3.51766  | -0.23622 | 1158.0425   | 1174.5692 | 1180.8100 |
| C                    | -3.8076  | -1.30583 | -0.4985  | 1182.4999   | 1190.1857 | 1190.6343 |
| C                    | -5.02482 | 0.80962  | -0.44353 | 1222.8462   | 1237.7703 | 1243.6038 |
| C                    | -3.66367 | 2.9412   | -0.29389 | 1246.7353   | 1260.0978 | 1261.5158 |
|                      |          |          |          | 1270.5675   | 1273.5862 | 1295.9680 |
|                      |          |          |          | 1313.3443   | 1325.0235 | 1343.0520 |
|                      |          |          |          | 1385.2759   | 1400.7875 | 1408.4903 |
|                      |          |          |          | 1411.7006   | 1419.4734 | 1420.6715 |
|                      |          |          |          | 1442.3304   | 1444.4869 | 1449.8218 |
|                      |          |          |          | 1455.9146   | 1459.2516 | 1478.0470 |
|                      |          |          |          | 1480.6680   | 1488.8296 | 1493.5903 |
|                      |          |          |          | 1511.4978   | 1514.6104 | 1532.7658 |
|                      |          |          |          | 1541.0209   | 1548.2815 | 1571.1847 |
|                      |          |          |          | 1581.6393   | 1629.6713 | 1644.2237 |
|                      |          |          |          | 1656.9634   | 1681.5721 | 1693.9909 |
|                      |          |          |          | 1700.6652   | 1709.1011 | 1717.6238 |
|                      |          |          |          | 1733.6900   | 3012.7164 | 3068.9877 |
|                      |          |          |          | 3080.3147   | 3168.9524 | 3171.1748 |
|                      |          |          |          | 3209.4400   | 3211.9023 | 3212.7049 |
|                      |          |          |          | 3215.2125   | 3220.0866 | 3221.2104 |
|                      |          |          |          | 3225.2951   | 3226.2511 | 3230.9140 |
|                      |          |          |          | 3233.4460   | 3237.9151 | 3241.9963 |

|   |          |          |          |           |           |           |
|---|----------|----------|----------|-----------|-----------|-----------|
| H | -2.30931 | 4.59596  | -0.21311 | 3242.6770 | 3245.0667 | 3245.9249 |
| C | -3.70604 | -2.73259 | -0.58834 |           |           |           |
| C | -5.02458 | -0.55698 | -0.51757 |           |           |           |
| C | -1.26702 | -2.57035 | -0.45349 |           |           |           |
| H | -5.95795 | 1.36246  | -0.46744 |           |           |           |
| H | -4.55283 | 3.56445  | -0.31252 |           |           |           |
| C | -2.48676 | -3.33511 | -0.5686  |           |           |           |
| H | -4.61109 | -3.32656 | -0.67293 |           |           |           |
| H | -5.96286 | -1.09705 | -0.59736 |           |           |           |
| H | -2.401   | -4.41389 | -0.63677 |           |           |           |
| N | -1.37538 | 1.38577  | -0.2266  |           |           |           |
| N | -1.38123 | -1.22494 | -0.36745 |           |           |           |
| O | -0.17067 | 0.09081  | 1.7631   |           |           |           |
| C | 0.11393  | -1.09142 | 2.47646  |           |           |           |
| H | -0.37454 | -1.96204 | 2.01463  |           |           |           |
| H | 1.19671  | -1.29393 | 2.49391  |           |           |           |
| C | 0.06868  | 3.34959  | -0.19009 |           |           |           |
| H | 0.05354  | 4.42994  | -0.29273 |           |           |           |
| C | -0.01341 | -3.20829 | -0.44456 |           |           |           |
| H | -0.01727 | -4.28791 | -0.53065 |           |           |           |
| H | 1.2486   | 1.25951  | 1.22394  |           |           |           |
| C | -0.40773 | -0.90474 | 3.89483  |           |           |           |
| H | 0.06828  | -0.04158 | 4.36513  |           |           |           |
| H | -1.48723 | -0.74151 | 3.88106  |           |           |           |
| H | -0.19007 | -1.79317 | 4.4933   |           |           |           |

#### Statistical Thermodynamic Analysis

Temperature = 403.15 K

Pressure = 1 atm

Zero-point correction = 0.426055

Electronic Energy = -1517.64521591

Internal Energy (E) = -1517.17476191

Enthalpy (H) = -1517.17348591

Gibbs Free Energy (G) = -1517.30003791

Gibbs Free Energy of Solvation = -1517.35699537

| St. Point                                                                                                                                                                                                                                                                                                                                                                                                                                                                                                                                                                                                                                                                                                                                                                                                                                                                                                                                                                                                                                                                                                                                                                                                                                                                                                                                                                                                                                                                                                                                                                                                                                                                                                                | General Structure | Ball & Stick model |          |   |   |   |         |         |          |   |        |         |          |   |         |        |          |   |         |         |         |   |         |         |          |   |         |        |          |   |         |         |          |   |         |          |          |   |         |         |          |   |         |          |          |   |         |         |          |   |         |          |          |   |         |          |          |   |         |         |          |   |         |         |          |   |         |         |          |   |         |          |          |   |         |          |          |   |         |       |         |   |        |          |        |    |          |         |         |                                                                                                                                                                                                                                                                                                                                                                                                                                                                                                                                                                                                                                                                                                                                                                                                                                                                                                                                                                                                                                                                                                                                                                                                                                                                                                                                                                                                                                                                                                                                                                                                                                                                                                                                                                                                                                                                                                                                                                                                                                                                                                                                                                                                                                                                                                                                                                                                                                                                                                                                                                                                                  |           |         |         |         |         |         |          |          |          |          |          |          |          |          |          |          |          |          |          |          |          |          |          |          |          |          |          |          |          |          |          |          |          |          |          |          |          |          |          |          |          |          |          |          |          |          |          |          |          |          |          |          |          |          |          |          |          |          |          |          |          |          |          |          |          |          |          |          |          |          |          |          |          |          |          |          |          |          |           |           |           |           |           |           |           |           |           |           |           |           |           |           |           |           |           |           |           |           |           |           |           |           |           |           |           |           |           |           |           |           |           |           |           |           |           |           |           |
|--------------------------------------------------------------------------------------------------------------------------------------------------------------------------------------------------------------------------------------------------------------------------------------------------------------------------------------------------------------------------------------------------------------------------------------------------------------------------------------------------------------------------------------------------------------------------------------------------------------------------------------------------------------------------------------------------------------------------------------------------------------------------------------------------------------------------------------------------------------------------------------------------------------------------------------------------------------------------------------------------------------------------------------------------------------------------------------------------------------------------------------------------------------------------------------------------------------------------------------------------------------------------------------------------------------------------------------------------------------------------------------------------------------------------------------------------------------------------------------------------------------------------------------------------------------------------------------------------------------------------------------------------------------------------------------------------------------------------|-------------------|--------------------|----------|---|---|---|---------|---------|----------|---|--------|---------|----------|---|---------|--------|----------|---|---------|---------|---------|---|---------|---------|----------|---|---------|--------|----------|---|---------|---------|----------|---|---------|----------|----------|---|---------|---------|----------|---|---------|----------|----------|---|---------|---------|----------|---|---------|----------|----------|---|---------|----------|----------|---|---------|---------|----------|---|---------|---------|----------|---|---------|---------|----------|---|---------|----------|----------|---|---------|----------|----------|---|---------|-------|---------|---|--------|----------|--------|----|----------|---------|---------|------------------------------------------------------------------------------------------------------------------------------------------------------------------------------------------------------------------------------------------------------------------------------------------------------------------------------------------------------------------------------------------------------------------------------------------------------------------------------------------------------------------------------------------------------------------------------------------------------------------------------------------------------------------------------------------------------------------------------------------------------------------------------------------------------------------------------------------------------------------------------------------------------------------------------------------------------------------------------------------------------------------------------------------------------------------------------------------------------------------------------------------------------------------------------------------------------------------------------------------------------------------------------------------------------------------------------------------------------------------------------------------------------------------------------------------------------------------------------------------------------------------------------------------------------------------------------------------------------------------------------------------------------------------------------------------------------------------------------------------------------------------------------------------------------------------------------------------------------------------------------------------------------------------------------------------------------------------------------------------------------------------------------------------------------------------------------------------------------------------------------------------------------------------------------------------------------------------------------------------------------------------------------------------------------------------------------------------------------------------------------------------------------------------------------------------------------------------------------------------------------------------------------------------------------------------------------------------------------------------|-----------|---------|---------|---------|---------|---------|----------|----------|----------|----------|----------|----------|----------|----------|----------|----------|----------|----------|----------|----------|----------|----------|----------|----------|----------|----------|----------|----------|----------|----------|----------|----------|----------|----------|----------|----------|----------|----------|----------|----------|----------|----------|----------|----------|----------|----------|----------|----------|----------|----------|----------|----------|----------|----------|----------|----------|----------|----------|----------|----------|----------|----------|----------|----------|----------|----------|----------|----------|----------|----------|----------|----------|----------|----------|----------|----------|----------|----------|-----------|-----------|-----------|-----------|-----------|-----------|-----------|-----------|-----------|-----------|-----------|-----------|-----------|-----------|-----------|-----------|-----------|-----------|-----------|-----------|-----------|-----------|-----------|-----------|-----------|-----------|-----------|-----------|-----------|-----------|-----------|-----------|-----------|-----------|-----------|-----------|-----------|-----------|-----------|
| TS2 <sub>MLC</sub>                                                                                                                                                                                                                                                                                                                                                                                                                                                                                                                                                                                                                                                                                                                                                                                                                                                                                                                                                                                                                                                                                                                                                                                                                                                                                                                                                                                                                                                                                                                                                                                                                                                                                                       |                   |                    |          |   |   |   |         |         |          |   |        |         |          |   |         |        |          |   |         |         |         |   |         |         |          |   |         |        |          |   |         |         |          |   |         |          |          |   |         |         |          |   |         |          |          |   |         |         |          |   |         |          |          |   |         |          |          |   |         |         |          |   |         |         |          |   |         |         |          |   |         |          |          |   |         |          |          |   |         |       |         |   |        |          |        |    |          |         |         |                                                                                                                                                                                                                                                                                                                                                                                                                                                                                                                                                                                                                                                                                                                                                                                                                                                                                                                                                                                                                                                                                                                                                                                                                                                                                                                                                                                                                                                                                                                                                                                                                                                                                                                                                                                                                                                                                                                                                                                                                                                                                                                                                                                                                                                                                                                                                                                                                                                                                                                                                                                                                  |           |         |         |         |         |         |          |          |          |          |          |          |          |          |          |          |          |          |          |          |          |          |          |          |          |          |          |          |          |          |          |          |          |          |          |          |          |          |          |          |          |          |          |          |          |          |          |          |          |          |          |          |          |          |          |          |          |          |          |          |          |          |          |          |          |          |          |          |          |          |          |          |          |          |          |          |          |          |           |           |           |           |           |           |           |           |           |           |           |           |           |           |           |           |           |           |           |           |           |           |           |           |           |           |           |           |           |           |           |           |           |           |           |           |           |           |           |
| <p style="text-align: center;"><b>Cartesian coordinate</b></p> <p>-----</p> <table border="1"> <thead> <tr> <th>Atoms</th> <th>X</th> <th>Y</th> <th>Z</th> </tr> </thead> <tbody> <tr><td>C</td><td>2.22961</td><td>3.60613</td><td>-0.60976</td></tr> <tr><td>C</td><td>3.4277</td><td>3.03296</td><td>-0.86607</td></tr> <tr><td>C</td><td>3.63147</td><td>1.5985</td><td>-0.73926</td></tr> <tr><td>C</td><td>2.56446</td><td>0.84612</td><td>-0.2789</td></tr> <tr><td>C</td><td>1.09558</td><td>2.82913</td><td>-0.15092</td></tr> <tr><td>C</td><td>4.82526</td><td>0.9261</td><td>-1.08231</td></tr> <tr><td>C</td><td>2.59527</td><td>-0.5528</td><td>-0.20687</td></tr> <tr><td>C</td><td>3.79045</td><td>-1.21171</td><td>-0.55798</td></tr> <tr><td>C</td><td>4.90249</td><td>-0.4464</td><td>-0.97145</td></tr> <tr><td>C</td><td>3.75361</td><td>-2.64506</td><td>-0.53817</td></tr> <tr><td>H</td><td>4.66416</td><td>-3.2034</td><td>-0.73358</td></tr> <tr><td>C</td><td>2.57325</td><td>-3.28545</td><td>-0.35079</td></tr> <tr><td>C</td><td>1.34381</td><td>-2.54907</td><td>-0.14698</td></tr> <tr><td>H</td><td>5.67503</td><td>1.49889</td><td>-1.43867</td></tr> <tr><td>H</td><td>2.07568</td><td>4.66849</td><td>-0.76463</td></tr> <tr><td>H</td><td>4.25734</td><td>3.64127</td><td>-1.21278</td></tr> <tr><td>H</td><td>5.81764</td><td>-0.96396</td><td>-1.24174</td></tr> <tr><td>H</td><td>2.50873</td><td>-4.36619</td><td>-0.41253</td></tr> <tr><td>N</td><td>1.35687</td><td>1.464</td><td>0.16933</td></tr> <tr><td>N</td><td>1.4271</td><td>-1.22062</td><td>0.0991</td></tr> <tr><td>Co</td><td>-0.07039</td><td>-0.0585</td><td>0.52123</td></tr> </tbody> </table> <p>-----</p> |                   | Atoms              | X        | Y | Z | C | 2.22961 | 3.60613 | -0.60976 | C | 3.4277 | 3.03296 | -0.86607 | C | 3.63147 | 1.5985 | -0.73926 | C | 2.56446 | 0.84612 | -0.2789 | C | 1.09558 | 2.82913 | -0.15092 | C | 4.82526 | 0.9261 | -1.08231 | C | 2.59527 | -0.5528 | -0.20687 | C | 3.79045 | -1.21171 | -0.55798 | C | 4.90249 | -0.4464 | -0.97145 | C | 3.75361 | -2.64506 | -0.53817 | H | 4.66416 | -3.2034 | -0.73358 | C | 2.57325 | -3.28545 | -0.35079 | C | 1.34381 | -2.54907 | -0.14698 | H | 5.67503 | 1.49889 | -1.43867 | H | 2.07568 | 4.66849 | -0.76463 | H | 4.25734 | 3.64127 | -1.21278 | H | 5.81764 | -0.96396 | -1.24174 | H | 2.50873 | -4.36619 | -0.41253 | N | 1.35687 | 1.464 | 0.16933 | N | 1.4271 | -1.22062 | 0.0991 | Co | -0.07039 | -0.0585 | 0.52123 | <p style="text-align: center;"><b>Frequencies</b></p> <table border="1"> <tbody> <tr><td>-396.4084</td><td>46.5312</td><td>53.7100</td></tr> <tr><td>57.7334</td><td>74.1757</td><td>94.8006</td></tr> <tr><td>114.3984</td><td>126.7765</td><td>144.6178</td></tr> <tr><td>169.8674</td><td>199.6672</td><td>205.3921</td></tr> <tr><td>213.2953</td><td>220.7477</td><td>236.0631</td></tr> <tr><td>241.8393</td><td>251.3341</td><td>260.6167</td></tr> <tr><td>269.9634</td><td>289.0643</td><td>320.8748</td></tr> <tr><td>328.3707</td><td>335.3726</td><td>350.8343</td></tr> <tr><td>381.8266</td><td>395.1608</td><td>397.7623</td></tr> <tr><td>437.3878</td><td>442.0980</td><td>445.4839</td></tr> <tr><td>458.6071</td><td>461.4549</td><td>472.1662</td></tr> <tr><td>482.6448</td><td>485.6088</td><td>487.6987</td></tr> <tr><td>497.1213</td><td>531.3851</td><td>545.3669</td></tr> <tr><td>568.2948</td><td>577.2518</td><td>586.5172</td></tr> <tr><td>588.1961</td><td>593.7234</td><td>595.0088</td></tr> <tr><td>619.5030</td><td>652.1101</td><td>666.3433</td></tr> <tr><td>678.5731</td><td>704.1935</td><td>707.3941</td></tr> <tr><td>714.9348</td><td>718.9647</td><td>731.7122</td></tr> <tr><td>753.2962</td><td>760.9753</td><td>770.0711</td></tr> <tr><td>782.6888</td><td>784.3466</td><td>805.8839</td></tr> <tr><td>821.6482</td><td>822.3717</td><td>835.4108</td></tr> <tr><td>845.1884</td><td>852.9244</td><td>860.2266</td></tr> <tr><td>872.6674</td><td>878.9294</td><td>881.6408</td></tr> <tr><td>905.0770</td><td>914.9868</td><td>917.5290</td></tr> <tr><td>942.2464</td><td>944.2455</td><td>981.3027</td></tr> <tr><td>987.6541</td><td>998.6506</td><td>998.7851</td></tr> <tr><td>1017.8048</td><td>1020.5324</td><td>1023.1019</td></tr> <tr><td>1026.5993</td><td>1027.6339</td><td>1058.8892</td></tr> <tr><td>1106.5062</td><td>1132.9831</td><td>1135.9678</td></tr> <tr><td>1141.7808</td><td>1151.3902</td><td>1173.9131</td></tr> <tr><td>1180.7891</td><td>1183.1549</td><td>1190.0308</td></tr> <tr><td>1224.7558</td><td>1233.2596</td><td>1240.1209</td></tr> <tr><td>1245.6183</td><td>1250.4412</td><td>1260.9447</td></tr> <tr><td>1262.2282</td><td>1275.6099</td><td>1275.9698</td></tr> <tr><td>1297.2499</td><td>1324.1744</td><td>1344.7335</td></tr> <tr><td>1374.5739</td><td>1391.8229</td><td>1393.5517</td></tr> <tr><td>1401.1008</td><td>1414.4898</td><td>1423.1949</td></tr> <tr><td>1432.4325</td><td>1440.1317</td><td>1445.1293</td></tr> <tr><td>1457.0510</td><td>1463.8627</td><td>1471.6909</td></tr> </tbody> </table> | -396.4084 | 46.5312 | 53.7100 | 57.7334 | 74.1757 | 94.8006 | 114.3984 | 126.7765 | 144.6178 | 169.8674 | 199.6672 | 205.3921 | 213.2953 | 220.7477 | 236.0631 | 241.8393 | 251.3341 | 260.6167 | 269.9634 | 289.0643 | 320.8748 | 328.3707 | 335.3726 | 350.8343 | 381.8266 | 395.1608 | 397.7623 | 437.3878 | 442.0980 | 445.4839 | 458.6071 | 461.4549 | 472.1662 | 482.6448 | 485.6088 | 487.6987 | 497.1213 | 531.3851 | 545.3669 | 568.2948 | 577.2518 | 586.5172 | 588.1961 | 593.7234 | 595.0088 | 619.5030 | 652.1101 | 666.3433 | 678.5731 | 704.1935 | 707.3941 | 714.9348 | 718.9647 | 731.7122 | 753.2962 | 760.9753 | 770.0711 | 782.6888 | 784.3466 | 805.8839 | 821.6482 | 822.3717 | 835.4108 | 845.1884 | 852.9244 | 860.2266 | 872.6674 | 878.9294 | 881.6408 | 905.0770 | 914.9868 | 917.5290 | 942.2464 | 944.2455 | 981.3027 | 987.6541 | 998.6506 | 998.7851 | 1017.8048 | 1020.5324 | 1023.1019 | 1026.5993 | 1027.6339 | 1058.8892 | 1106.5062 | 1132.9831 | 1135.9678 | 1141.7808 | 1151.3902 | 1173.9131 | 1180.7891 | 1183.1549 | 1190.0308 | 1224.7558 | 1233.2596 | 1240.1209 | 1245.6183 | 1250.4412 | 1260.9447 | 1262.2282 | 1275.6099 | 1275.9698 | 1297.2499 | 1324.1744 | 1344.7335 | 1374.5739 | 1391.8229 | 1393.5517 | 1401.1008 | 1414.4898 | 1423.1949 | 1432.4325 | 1440.1317 | 1445.1293 | 1457.0510 | 1463.8627 | 1471.6909 |
| Atoms                                                                                                                                                                                                                                                                                                                                                                                                                                                                                                                                                                                                                                                                                                                                                                                                                                                                                                                                                                                                                                                                                                                                                                                                                                                                                                                                                                                                                                                                                                                                                                                                                                                                                                                    | X                 | Y                  | Z        |   |   |   |         |         |          |   |        |         |          |   |         |        |          |   |         |         |         |   |         |         |          |   |         |        |          |   |         |         |          |   |         |          |          |   |         |         |          |   |         |          |          |   |         |         |          |   |         |          |          |   |         |          |          |   |         |         |          |   |         |         |          |   |         |         |          |   |         |          |          |   |         |          |          |   |         |       |         |   |        |          |        |    |          |         |         |                                                                                                                                                                                                                                                                                                                                                                                                                                                                                                                                                                                                                                                                                                                                                                                                                                                                                                                                                                                                                                                                                                                                                                                                                                                                                                                                                                                                                                                                                                                                                                                                                                                                                                                                                                                                                                                                                                                                                                                                                                                                                                                                                                                                                                                                                                                                                                                                                                                                                                                                                                                                                  |           |         |         |         |         |         |          |          |          |          |          |          |          |          |          |          |          |          |          |          |          |          |          |          |          |          |          |          |          |          |          |          |          |          |          |          |          |          |          |          |          |          |          |          |          |          |          |          |          |          |          |          |          |          |          |          |          |          |          |          |          |          |          |          |          |          |          |          |          |          |          |          |          |          |          |          |          |          |           |           |           |           |           |           |           |           |           |           |           |           |           |           |           |           |           |           |           |           |           |           |           |           |           |           |           |           |           |           |           |           |           |           |           |           |           |           |           |
| C                                                                                                                                                                                                                                                                                                                                                                                                                                                                                                                                                                                                                                                                                                                                                                                                                                                                                                                                                                                                                                                                                                                                                                                                                                                                                                                                                                                                                                                                                                                                                                                                                                                                                                                        | 2.22961           | 3.60613            | -0.60976 |   |   |   |         |         |          |   |        |         |          |   |         |        |          |   |         |         |         |   |         |         |          |   |         |        |          |   |         |         |          |   |         |          |          |   |         |         |          |   |         |          |          |   |         |         |          |   |         |          |          |   |         |          |          |   |         |         |          |   |         |         |          |   |         |         |          |   |         |          |          |   |         |          |          |   |         |       |         |   |        |          |        |    |          |         |         |                                                                                                                                                                                                                                                                                                                                                                                                                                                                                                                                                                                                                                                                                                                                                                                                                                                                                                                                                                                                                                                                                                                                                                                                                                                                                                                                                                                                                                                                                                                                                                                                                                                                                                                                                                                                                                                                                                                                                                                                                                                                                                                                                                                                                                                                                                                                                                                                                                                                                                                                                                                                                  |           |         |         |         |         |         |          |          |          |          |          |          |          |          |          |          |          |          |          |          |          |          |          |          |          |          |          |          |          |          |          |          |          |          |          |          |          |          |          |          |          |          |          |          |          |          |          |          |          |          |          |          |          |          |          |          |          |          |          |          |          |          |          |          |          |          |          |          |          |          |          |          |          |          |          |          |          |          |           |           |           |           |           |           |           |           |           |           |           |           |           |           |           |           |           |           |           |           |           |           |           |           |           |           |           |           |           |           |           |           |           |           |           |           |           |           |           |
| C                                                                                                                                                                                                                                                                                                                                                                                                                                                                                                                                                                                                                                                                                                                                                                                                                                                                                                                                                                                                                                                                                                                                                                                                                                                                                                                                                                                                                                                                                                                                                                                                                                                                                                                        | 3.4277            | 3.03296            | -0.86607 |   |   |   |         |         |          |   |        |         |          |   |         |        |          |   |         |         |         |   |         |         |          |   |         |        |          |   |         |         |          |   |         |          |          |   |         |         |          |   |         |          |          |   |         |         |          |   |         |          |          |   |         |          |          |   |         |         |          |   |         |         |          |   |         |         |          |   |         |          |          |   |         |          |          |   |         |       |         |   |        |          |        |    |          |         |         |                                                                                                                                                                                                                                                                                                                                                                                                                                                                                                                                                                                                                                                                                                                                                                                                                                                                                                                                                                                                                                                                                                                                                                                                                                                                                                                                                                                                                                                                                                                                                                                                                                                                                                                                                                                                                                                                                                                                                                                                                                                                                                                                                                                                                                                                                                                                                                                                                                                                                                                                                                                                                  |           |         |         |         |         |         |          |          |          |          |          |          |          |          |          |          |          |          |          |          |          |          |          |          |          |          |          |          |          |          |          |          |          |          |          |          |          |          |          |          |          |          |          |          |          |          |          |          |          |          |          |          |          |          |          |          |          |          |          |          |          |          |          |          |          |          |          |          |          |          |          |          |          |          |          |          |          |          |           |           |           |           |           |           |           |           |           |           |           |           |           |           |           |           |           |           |           |           |           |           |           |           |           |           |           |           |           |           |           |           |           |           |           |           |           |           |           |
| C                                                                                                                                                                                                                                                                                                                                                                                                                                                                                                                                                                                                                                                                                                                                                                                                                                                                                                                                                                                                                                                                                                                                                                                                                                                                                                                                                                                                                                                                                                                                                                                                                                                                                                                        | 3.63147           | 1.5985             | -0.73926 |   |   |   |         |         |          |   |        |         |          |   |         |        |          |   |         |         |         |   |         |         |          |   |         |        |          |   |         |         |          |   |         |          |          |   |         |         |          |   |         |          |          |   |         |         |          |   |         |          |          |   |         |          |          |   |         |         |          |   |         |         |          |   |         |         |          |   |         |          |          |   |         |          |          |   |         |       |         |   |        |          |        |    |          |         |         |                                                                                                                                                                                                                                                                                                                                                                                                                                                                                                                                                                                                                                                                                                                                                                                                                                                                                                                                                                                                                                                                                                                                                                                                                                                                                                                                                                                                                                                                                                                                                                                                                                                                                                                                                                                                                                                                                                                                                                                                                                                                                                                                                                                                                                                                                                                                                                                                                                                                                                                                                                                                                  |           |         |         |         |         |         |          |          |          |          |          |          |          |          |          |          |          |          |          |          |          |          |          |          |          |          |          |          |          |          |          |          |          |          |          |          |          |          |          |          |          |          |          |          |          |          |          |          |          |          |          |          |          |          |          |          |          |          |          |          |          |          |          |          |          |          |          |          |          |          |          |          |          |          |          |          |          |          |           |           |           |           |           |           |           |           |           |           |           |           |           |           |           |           |           |           |           |           |           |           |           |           |           |           |           |           |           |           |           |           |           |           |           |           |           |           |           |
| C                                                                                                                                                                                                                                                                                                                                                                                                                                                                                                                                                                                                                                                                                                                                                                                                                                                                                                                                                                                                                                                                                                                                                                                                                                                                                                                                                                                                                                                                                                                                                                                                                                                                                                                        | 2.56446           | 0.84612            | -0.2789  |   |   |   |         |         |          |   |        |         |          |   |         |        |          |   |         |         |         |   |         |         |          |   |         |        |          |   |         |         |          |   |         |          |          |   |         |         |          |   |         |          |          |   |         |         |          |   |         |          |          |   |         |          |          |   |         |         |          |   |         |         |          |   |         |         |          |   |         |          |          |   |         |          |          |   |         |       |         |   |        |          |        |    |          |         |         |                                                                                                                                                                                                                                                                                                                                                                                                                                                                                                                                                                                                                                                                                                                                                                                                                                                                                                                                                                                                                                                                                                                                                                                                                                                                                                                                                                                                                                                                                                                                                                                                                                                                                                                                                                                                                                                                                                                                                                                                                                                                                                                                                                                                                                                                                                                                                                                                                                                                                                                                                                                                                  |           |         |         |         |         |         |          |          |          |          |          |          |          |          |          |          |          |          |          |          |          |          |          |          |          |          |          |          |          |          |          |          |          |          |          |          |          |          |          |          |          |          |          |          |          |          |          |          |          |          |          |          |          |          |          |          |          |          |          |          |          |          |          |          |          |          |          |          |          |          |          |          |          |          |          |          |          |          |           |           |           |           |           |           |           |           |           |           |           |           |           |           |           |           |           |           |           |           |           |           |           |           |           |           |           |           |           |           |           |           |           |           |           |           |           |           |           |
| C                                                                                                                                                                                                                                                                                                                                                                                                                                                                                                                                                                                                                                                                                                                                                                                                                                                                                                                                                                                                                                                                                                                                                                                                                                                                                                                                                                                                                                                                                                                                                                                                                                                                                                                        | 1.09558           | 2.82913            | -0.15092 |   |   |   |         |         |          |   |        |         |          |   |         |        |          |   |         |         |         |   |         |         |          |   |         |        |          |   |         |         |          |   |         |          |          |   |         |         |          |   |         |          |          |   |         |         |          |   |         |          |          |   |         |          |          |   |         |         |          |   |         |         |          |   |         |         |          |   |         |          |          |   |         |          |          |   |         |       |         |   |        |          |        |    |          |         |         |                                                                                                                                                                                                                                                                                                                                                                                                                                                                                                                                                                                                                                                                                                                                                                                                                                                                                                                                                                                                                                                                                                                                                                                                                                                                                                                                                                                                                                                                                                                                                                                                                                                                                                                                                                                                                                                                                                                                                                                                                                                                                                                                                                                                                                                                                                                                                                                                                                                                                                                                                                                                                  |           |         |         |         |         |         |          |          |          |          |          |          |          |          |          |          |          |          |          |          |          |          |          |          |          |          |          |          |          |          |          |          |          |          |          |          |          |          |          |          |          |          |          |          |          |          |          |          |          |          |          |          |          |          |          |          |          |          |          |          |          |          |          |          |          |          |          |          |          |          |          |          |          |          |          |          |          |          |           |           |           |           |           |           |           |           |           |           |           |           |           |           |           |           |           |           |           |           |           |           |           |           |           |           |           |           |           |           |           |           |           |           |           |           |           |           |           |
| C                                                                                                                                                                                                                                                                                                                                                                                                                                                                                                                                                                                                                                                                                                                                                                                                                                                                                                                                                                                                                                                                                                                                                                                                                                                                                                                                                                                                                                                                                                                                                                                                                                                                                                                        | 4.82526           | 0.9261             | -1.08231 |   |   |   |         |         |          |   |        |         |          |   |         |        |          |   |         |         |         |   |         |         |          |   |         |        |          |   |         |         |          |   |         |          |          |   |         |         |          |   |         |          |          |   |         |         |          |   |         |          |          |   |         |          |          |   |         |         |          |   |         |         |          |   |         |         |          |   |         |          |          |   |         |          |          |   |         |       |         |   |        |          |        |    |          |         |         |                                                                                                                                                                                                                                                                                                                                                                                                                                                                                                                                                                                                                                                                                                                                                                                                                                                                                                                                                                                                                                                                                                                                                                                                                                                                                                                                                                                                                                                                                                                                                                                                                                                                                                                                                                                                                                                                                                                                                                                                                                                                                                                                                                                                                                                                                                                                                                                                                                                                                                                                                                                                                  |           |         |         |         |         |         |          |          |          |          |          |          |          |          |          |          |          |          |          |          |          |          |          |          |          |          |          |          |          |          |          |          |          |          |          |          |          |          |          |          |          |          |          |          |          |          |          |          |          |          |          |          |          |          |          |          |          |          |          |          |          |          |          |          |          |          |          |          |          |          |          |          |          |          |          |          |          |          |           |           |           |           |           |           |           |           |           |           |           |           |           |           |           |           |           |           |           |           |           |           |           |           |           |           |           |           |           |           |           |           |           |           |           |           |           |           |           |
| C                                                                                                                                                                                                                                                                                                                                                                                                                                                                                                                                                                                                                                                                                                                                                                                                                                                                                                                                                                                                                                                                                                                                                                                                                                                                                                                                                                                                                                                                                                                                                                                                                                                                                                                        | 2.59527           | -0.5528            | -0.20687 |   |   |   |         |         |          |   |        |         |          |   |         |        |          |   |         |         |         |   |         |         |          |   |         |        |          |   |         |         |          |   |         |          |          |   |         |         |          |   |         |          |          |   |         |         |          |   |         |          |          |   |         |          |          |   |         |         |          |   |         |         |          |   |         |         |          |   |         |          |          |   |         |          |          |   |         |       |         |   |        |          |        |    |          |         |         |                                                                                                                                                                                                                                                                                                                                                                                                                                                                                                                                                                                                                                                                                                                                                                                                                                                                                                                                                                                                                                                                                                                                                                                                                                                                                                                                                                                                                                                                                                                                                                                                                                                                                                                                                                                                                                                                                                                                                                                                                                                                                                                                                                                                                                                                                                                                                                                                                                                                                                                                                                                                                  |           |         |         |         |         |         |          |          |          |          |          |          |          |          |          |          |          |          |          |          |          |          |          |          |          |          |          |          |          |          |          |          |          |          |          |          |          |          |          |          |          |          |          |          |          |          |          |          |          |          |          |          |          |          |          |          |          |          |          |          |          |          |          |          |          |          |          |          |          |          |          |          |          |          |          |          |          |          |           |           |           |           |           |           |           |           |           |           |           |           |           |           |           |           |           |           |           |           |           |           |           |           |           |           |           |           |           |           |           |           |           |           |           |           |           |           |           |
| C                                                                                                                                                                                                                                                                                                                                                                                                                                                                                                                                                                                                                                                                                                                                                                                                                                                                                                                                                                                                                                                                                                                                                                                                                                                                                                                                                                                                                                                                                                                                                                                                                                                                                                                        | 3.79045           | -1.21171           | -0.55798 |   |   |   |         |         |          |   |        |         |          |   |         |        |          |   |         |         |         |   |         |         |          |   |         |        |          |   |         |         |          |   |         |          |          |   |         |         |          |   |         |          |          |   |         |         |          |   |         |          |          |   |         |          |          |   |         |         |          |   |         |         |          |   |         |         |          |   |         |          |          |   |         |          |          |   |         |       |         |   |        |          |        |    |          |         |         |                                                                                                                                                                                                                                                                                                                                                                                                                                                                                                                                                                                                                                                                                                                                                                                                                                                                                                                                                                                                                                                                                                                                                                                                                                                                                                                                                                                                                                                                                                                                                                                                                                                                                                                                                                                                                                                                                                                                                                                                                                                                                                                                                                                                                                                                                                                                                                                                                                                                                                                                                                                                                  |           |         |         |         |         |         |          |          |          |          |          |          |          |          |          |          |          |          |          |          |          |          |          |          |          |          |          |          |          |          |          |          |          |          |          |          |          |          |          |          |          |          |          |          |          |          |          |          |          |          |          |          |          |          |          |          |          |          |          |          |          |          |          |          |          |          |          |          |          |          |          |          |          |          |          |          |          |          |           |           |           |           |           |           |           |           |           |           |           |           |           |           |           |           |           |           |           |           |           |           |           |           |           |           |           |           |           |           |           |           |           |           |           |           |           |           |           |
| C                                                                                                                                                                                                                                                                                                                                                                                                                                                                                                                                                                                                                                                                                                                                                                                                                                                                                                                                                                                                                                                                                                                                                                                                                                                                                                                                                                                                                                                                                                                                                                                                                                                                                                                        | 4.90249           | -0.4464            | -0.97145 |   |   |   |         |         |          |   |        |         |          |   |         |        |          |   |         |         |         |   |         |         |          |   |         |        |          |   |         |         |          |   |         |          |          |   |         |         |          |   |         |          |          |   |         |         |          |   |         |          |          |   |         |          |          |   |         |         |          |   |         |         |          |   |         |         |          |   |         |          |          |   |         |          |          |   |         |       |         |   |        |          |        |    |          |         |         |                                                                                                                                                                                                                                                                                                                                                                                                                                                                                                                                                                                                                                                                                                                                                                                                                                                                                                                                                                                                                                                                                                                                                                                                                                                                                                                                                                                                                                                                                                                                                                                                                                                                                                                                                                                                                                                                                                                                                                                                                                                                                                                                                                                                                                                                                                                                                                                                                                                                                                                                                                                                                  |           |         |         |         |         |         |          |          |          |          |          |          |          |          |          |          |          |          |          |          |          |          |          |          |          |          |          |          |          |          |          |          |          |          |          |          |          |          |          |          |          |          |          |          |          |          |          |          |          |          |          |          |          |          |          |          |          |          |          |          |          |          |          |          |          |          |          |          |          |          |          |          |          |          |          |          |          |          |           |           |           |           |           |           |           |           |           |           |           |           |           |           |           |           |           |           |           |           |           |           |           |           |           |           |           |           |           |           |           |           |           |           |           |           |           |           |           |
| C                                                                                                                                                                                                                                                                                                                                                                                                                                                                                                                                                                                                                                                                                                                                                                                                                                                                                                                                                                                                                                                                                                                                                                                                                                                                                                                                                                                                                                                                                                                                                                                                                                                                                                                        | 3.75361           | -2.64506           | -0.53817 |   |   |   |         |         |          |   |        |         |          |   |         |        |          |   |         |         |         |   |         |         |          |   |         |        |          |   |         |         |          |   |         |          |          |   |         |         |          |   |         |          |          |   |         |         |          |   |         |          |          |   |         |          |          |   |         |         |          |   |         |         |          |   |         |         |          |   |         |          |          |   |         |          |          |   |         |       |         |   |        |          |        |    |          |         |         |                                                                                                                                                                                                                                                                                                                                                                                                                                                                                                                                                                                                                                                                                                                                                                                                                                                                                                                                                                                                                                                                                                                                                                                                                                                                                                                                                                                                                                                                                                                                                                                                                                                                                                                                                                                                                                                                                                                                                                                                                                                                                                                                                                                                                                                                                                                                                                                                                                                                                                                                                                                                                  |           |         |         |         |         |         |          |          |          |          |          |          |          |          |          |          |          |          |          |          |          |          |          |          |          |          |          |          |          |          |          |          |          |          |          |          |          |          |          |          |          |          |          |          |          |          |          |          |          |          |          |          |          |          |          |          |          |          |          |          |          |          |          |          |          |          |          |          |          |          |          |          |          |          |          |          |          |          |           |           |           |           |           |           |           |           |           |           |           |           |           |           |           |           |           |           |           |           |           |           |           |           |           |           |           |           |           |           |           |           |           |           |           |           |           |           |           |
| H                                                                                                                                                                                                                                                                                                                                                                                                                                                                                                                                                                                                                                                                                                                                                                                                                                                                                                                                                                                                                                                                                                                                                                                                                                                                                                                                                                                                                                                                                                                                                                                                                                                                                                                        | 4.66416           | -3.2034            | -0.73358 |   |   |   |         |         |          |   |        |         |          |   |         |        |          |   |         |         |         |   |         |         |          |   |         |        |          |   |         |         |          |   |         |          |          |   |         |         |          |   |         |          |          |   |         |         |          |   |         |          |          |   |         |          |          |   |         |         |          |   |         |         |          |   |         |         |          |   |         |          |          |   |         |          |          |   |         |       |         |   |        |          |        |    |          |         |         |                                                                                                                                                                                                                                                                                                                                                                                                                                                                                                                                                                                                                                                                                                                                                                                                                                                                                                                                                                                                                                                                                                                                                                                                                                                                                                                                                                                                                                                                                                                                                                                                                                                                                                                                                                                                                                                                                                                                                                                                                                                                                                                                                                                                                                                                                                                                                                                                                                                                                                                                                                                                                  |           |         |         |         |         |         |          |          |          |          |          |          |          |          |          |          |          |          |          |          |          |          |          |          |          |          |          |          |          |          |          |          |          |          |          |          |          |          |          |          |          |          |          |          |          |          |          |          |          |          |          |          |          |          |          |          |          |          |          |          |          |          |          |          |          |          |          |          |          |          |          |          |          |          |          |          |          |          |           |           |           |           |           |           |           |           |           |           |           |           |           |           |           |           |           |           |           |           |           |           |           |           |           |           |           |           |           |           |           |           |           |           |           |           |           |           |           |
| C                                                                                                                                                                                                                                                                                                                                                                                                                                                                                                                                                                                                                                                                                                                                                                                                                                                                                                                                                                                                                                                                                                                                                                                                                                                                                                                                                                                                                                                                                                                                                                                                                                                                                                                        | 2.57325           | -3.28545           | -0.35079 |   |   |   |         |         |          |   |        |         |          |   |         |        |          |   |         |         |         |   |         |         |          |   |         |        |          |   |         |         |          |   |         |          |          |   |         |         |          |   |         |          |          |   |         |         |          |   |         |          |          |   |         |          |          |   |         |         |          |   |         |         |          |   |         |         |          |   |         |          |          |   |         |          |          |   |         |       |         |   |        |          |        |    |          |         |         |                                                                                                                                                                                                                                                                                                                                                                                                                                                                                                                                                                                                                                                                                                                                                                                                                                                                                                                                                                                                                                                                                                                                                                                                                                                                                                                                                                                                                                                                                                                                                                                                                                                                                                                                                                                                                                                                                                                                                                                                                                                                                                                                                                                                                                                                                                                                                                                                                                                                                                                                                                                                                  |           |         |         |         |         |         |          |          |          |          |          |          |          |          |          |          |          |          |          |          |          |          |          |          |          |          |          |          |          |          |          |          |          |          |          |          |          |          |          |          |          |          |          |          |          |          |          |          |          |          |          |          |          |          |          |          |          |          |          |          |          |          |          |          |          |          |          |          |          |          |          |          |          |          |          |          |          |          |           |           |           |           |           |           |           |           |           |           |           |           |           |           |           |           |           |           |           |           |           |           |           |           |           |           |           |           |           |           |           |           |           |           |           |           |           |           |           |
| C                                                                                                                                                                                                                                                                                                                                                                                                                                                                                                                                                                                                                                                                                                                                                                                                                                                                                                                                                                                                                                                                                                                                                                                                                                                                                                                                                                                                                                                                                                                                                                                                                                                                                                                        | 1.34381           | -2.54907           | -0.14698 |   |   |   |         |         |          |   |        |         |          |   |         |        |          |   |         |         |         |   |         |         |          |   |         |        |          |   |         |         |          |   |         |          |          |   |         |         |          |   |         |          |          |   |         |         |          |   |         |          |          |   |         |          |          |   |         |         |          |   |         |         |          |   |         |         |          |   |         |          |          |   |         |          |          |   |         |       |         |   |        |          |        |    |          |         |         |                                                                                                                                                                                                                                                                                                                                                                                                                                                                                                                                                                                                                                                                                                                                                                                                                                                                                                                                                                                                                                                                                                                                                                                                                                                                                                                                                                                                                                                                                                                                                                                                                                                                                                                                                                                                                                                                                                                                                                                                                                                                                                                                                                                                                                                                                                                                                                                                                                                                                                                                                                                                                  |           |         |         |         |         |         |          |          |          |          |          |          |          |          |          |          |          |          |          |          |          |          |          |          |          |          |          |          |          |          |          |          |          |          |          |          |          |          |          |          |          |          |          |          |          |          |          |          |          |          |          |          |          |          |          |          |          |          |          |          |          |          |          |          |          |          |          |          |          |          |          |          |          |          |          |          |          |          |           |           |           |           |           |           |           |           |           |           |           |           |           |           |           |           |           |           |           |           |           |           |           |           |           |           |           |           |           |           |           |           |           |           |           |           |           |           |           |
| H                                                                                                                                                                                                                                                                                                                                                                                                                                                                                                                                                                                                                                                                                                                                                                                                                                                                                                                                                                                                                                                                                                                                                                                                                                                                                                                                                                                                                                                                                                                                                                                                                                                                                                                        | 5.67503           | 1.49889            | -1.43867 |   |   |   |         |         |          |   |        |         |          |   |         |        |          |   |         |         |         |   |         |         |          |   |         |        |          |   |         |         |          |   |         |          |          |   |         |         |          |   |         |          |          |   |         |         |          |   |         |          |          |   |         |          |          |   |         |         |          |   |         |         |          |   |         |         |          |   |         |          |          |   |         |          |          |   |         |       |         |   |        |          |        |    |          |         |         |                                                                                                                                                                                                                                                                                                                                                                                                                                                                                                                                                                                                                                                                                                                                                                                                                                                                                                                                                                                                                                                                                                                                                                                                                                                                                                                                                                                                                                                                                                                                                                                                                                                                                                                                                                                                                                                                                                                                                                                                                                                                                                                                                                                                                                                                                                                                                                                                                                                                                                                                                                                                                  |           |         |         |         |         |         |          |          |          |          |          |          |          |          |          |          |          |          |          |          |          |          |          |          |          |          |          |          |          |          |          |          |          |          |          |          |          |          |          |          |          |          |          |          |          |          |          |          |          |          |          |          |          |          |          |          |          |          |          |          |          |          |          |          |          |          |          |          |          |          |          |          |          |          |          |          |          |          |           |           |           |           |           |           |           |           |           |           |           |           |           |           |           |           |           |           |           |           |           |           |           |           |           |           |           |           |           |           |           |           |           |           |           |           |           |           |           |
| H                                                                                                                                                                                                                                                                                                                                                                                                                                                                                                                                                                                                                                                                                                                                                                                                                                                                                                                                                                                                                                                                                                                                                                                                                                                                                                                                                                                                                                                                                                                                                                                                                                                                                                                        | 2.07568           | 4.66849            | -0.76463 |   |   |   |         |         |          |   |        |         |          |   |         |        |          |   |         |         |         |   |         |         |          |   |         |        |          |   |         |         |          |   |         |          |          |   |         |         |          |   |         |          |          |   |         |         |          |   |         |          |          |   |         |          |          |   |         |         |          |   |         |         |          |   |         |         |          |   |         |          |          |   |         |          |          |   |         |       |         |   |        |          |        |    |          |         |         |                                                                                                                                                                                                                                                                                                                                                                                                                                                                                                                                                                                                                                                                                                                                                                                                                                                                                                                                                                                                                                                                                                                                                                                                                                                                                                                                                                                                                                                                                                                                                                                                                                                                                                                                                                                                                                                                                                                                                                                                                                                                                                                                                                                                                                                                                                                                                                                                                                                                                                                                                                                                                  |           |         |         |         |         |         |          |          |          |          |          |          |          |          |          |          |          |          |          |          |          |          |          |          |          |          |          |          |          |          |          |          |          |          |          |          |          |          |          |          |          |          |          |          |          |          |          |          |          |          |          |          |          |          |          |          |          |          |          |          |          |          |          |          |          |          |          |          |          |          |          |          |          |          |          |          |          |          |           |           |           |           |           |           |           |           |           |           |           |           |           |           |           |           |           |           |           |           |           |           |           |           |           |           |           |           |           |           |           |           |           |           |           |           |           |           |           |
| H                                                                                                                                                                                                                                                                                                                                                                                                                                                                                                                                                                                                                                                                                                                                                                                                                                                                                                                                                                                                                                                                                                                                                                                                                                                                                                                                                                                                                                                                                                                                                                                                                                                                                                                        | 4.25734           | 3.64127            | -1.21278 |   |   |   |         |         |          |   |        |         |          |   |         |        |          |   |         |         |         |   |         |         |          |   |         |        |          |   |         |         |          |   |         |          |          |   |         |         |          |   |         |          |          |   |         |         |          |   |         |          |          |   |         |          |          |   |         |         |          |   |         |         |          |   |         |         |          |   |         |          |          |   |         |          |          |   |         |       |         |   |        |          |        |    |          |         |         |                                                                                                                                                                                                                                                                                                                                                                                                                                                                                                                                                                                                                                                                                                                                                                                                                                                                                                                                                                                                                                                                                                                                                                                                                                                                                                                                                                                                                                                                                                                                                                                                                                                                                                                                                                                                                                                                                                                                                                                                                                                                                                                                                                                                                                                                                                                                                                                                                                                                                                                                                                                                                  |           |         |         |         |         |         |          |          |          |          |          |          |          |          |          |          |          |          |          |          |          |          |          |          |          |          |          |          |          |          |          |          |          |          |          |          |          |          |          |          |          |          |          |          |          |          |          |          |          |          |          |          |          |          |          |          |          |          |          |          |          |          |          |          |          |          |          |          |          |          |          |          |          |          |          |          |          |          |           |           |           |           |           |           |           |           |           |           |           |           |           |           |           |           |           |           |           |           |           |           |           |           |           |           |           |           |           |           |           |           |           |           |           |           |           |           |           |
| H                                                                                                                                                                                                                                                                                                                                                                                                                                                                                                                                                                                                                                                                                                                                                                                                                                                                                                                                                                                                                                                                                                                                                                                                                                                                                                                                                                                                                                                                                                                                                                                                                                                                                                                        | 5.81764           | -0.96396           | -1.24174 |   |   |   |         |         |          |   |        |         |          |   |         |        |          |   |         |         |         |   |         |         |          |   |         |        |          |   |         |         |          |   |         |          |          |   |         |         |          |   |         |          |          |   |         |         |          |   |         |          |          |   |         |          |          |   |         |         |          |   |         |         |          |   |         |         |          |   |         |          |          |   |         |          |          |   |         |       |         |   |        |          |        |    |          |         |         |                                                                                                                                                                                                                                                                                                                                                                                                                                                                                                                                                                                                                                                                                                                                                                                                                                                                                                                                                                                                                                                                                                                                                                                                                                                                                                                                                                                                                                                                                                                                                                                                                                                                                                                                                                                                                                                                                                                                                                                                                                                                                                                                                                                                                                                                                                                                                                                                                                                                                                                                                                                                                  |           |         |         |         |         |         |          |          |          |          |          |          |          |          |          |          |          |          |          |          |          |          |          |          |          |          |          |          |          |          |          |          |          |          |          |          |          |          |          |          |          |          |          |          |          |          |          |          |          |          |          |          |          |          |          |          |          |          |          |          |          |          |          |          |          |          |          |          |          |          |          |          |          |          |          |          |          |          |           |           |           |           |           |           |           |           |           |           |           |           |           |           |           |           |           |           |           |           |           |           |           |           |           |           |           |           |           |           |           |           |           |           |           |           |           |           |           |
| H                                                                                                                                                                                                                                                                                                                                                                                                                                                                                                                                                                                                                                                                                                                                                                                                                                                                                                                                                                                                                                                                                                                                                                                                                                                                                                                                                                                                                                                                                                                                                                                                                                                                                                                        | 2.50873           | -4.36619           | -0.41253 |   |   |   |         |         |          |   |        |         |          |   |         |        |          |   |         |         |         |   |         |         |          |   |         |        |          |   |         |         |          |   |         |          |          |   |         |         |          |   |         |          |          |   |         |         |          |   |         |          |          |   |         |          |          |   |         |         |          |   |         |         |          |   |         |         |          |   |         |          |          |   |         |          |          |   |         |       |         |   |        |          |        |    |          |         |         |                                                                                                                                                                                                                                                                                                                                                                                                                                                                                                                                                                                                                                                                                                                                                                                                                                                                                                                                                                                                                                                                                                                                                                                                                                                                                                                                                                                                                                                                                                                                                                                                                                                                                                                                                                                                                                                                                                                                                                                                                                                                                                                                                                                                                                                                                                                                                                                                                                                                                                                                                                                                                  |           |         |         |         |         |         |          |          |          |          |          |          |          |          |          |          |          |          |          |          |          |          |          |          |          |          |          |          |          |          |          |          |          |          |          |          |          |          |          |          |          |          |          |          |          |          |          |          |          |          |          |          |          |          |          |          |          |          |          |          |          |          |          |          |          |          |          |          |          |          |          |          |          |          |          |          |          |          |           |           |           |           |           |           |           |           |           |           |           |           |           |           |           |           |           |           |           |           |           |           |           |           |           |           |           |           |           |           |           |           |           |           |           |           |           |           |           |
| N                                                                                                                                                                                                                                                                                                                                                                                                                                                                                                                                                                                                                                                                                                                                                                                                                                                                                                                                                                                                                                                                                                                                                                                                                                                                                                                                                                                                                                                                                                                                                                                                                                                                                                                        | 1.35687           | 1.464              | 0.16933  |   |   |   |         |         |          |   |        |         |          |   |         |        |          |   |         |         |         |   |         |         |          |   |         |        |          |   |         |         |          |   |         |          |          |   |         |         |          |   |         |          |          |   |         |         |          |   |         |          |          |   |         |          |          |   |         |         |          |   |         |         |          |   |         |         |          |   |         |          |          |   |         |          |          |   |         |       |         |   |        |          |        |    |          |         |         |                                                                                                                                                                                                                                                                                                                                                                                                                                                                                                                                                                                                                                                                                                                                                                                                                                                                                                                                                                                                                                                                                                                                                                                                                                                                                                                                                                                                                                                                                                                                                                                                                                                                                                                                                                                                                                                                                                                                                                                                                                                                                                                                                                                                                                                                                                                                                                                                                                                                                                                                                                                                                  |           |         |         |         |         |         |          |          |          |          |          |          |          |          |          |          |          |          |          |          |          |          |          |          |          |          |          |          |          |          |          |          |          |          |          |          |          |          |          |          |          |          |          |          |          |          |          |          |          |          |          |          |          |          |          |          |          |          |          |          |          |          |          |          |          |          |          |          |          |          |          |          |          |          |          |          |          |          |           |           |           |           |           |           |           |           |           |           |           |           |           |           |           |           |           |           |           |           |           |           |           |           |           |           |           |           |           |           |           |           |           |           |           |           |           |           |           |
| N                                                                                                                                                                                                                                                                                                                                                                                                                                                                                                                                                                                                                                                                                                                                                                                                                                                                                                                                                                                                                                                                                                                                                                                                                                                                                                                                                                                                                                                                                                                                                                                                                                                                                                                        | 1.4271            | -1.22062           | 0.0991   |   |   |   |         |         |          |   |        |         |          |   |         |        |          |   |         |         |         |   |         |         |          |   |         |        |          |   |         |         |          |   |         |          |          |   |         |         |          |   |         |          |          |   |         |         |          |   |         |          |          |   |         |          |          |   |         |         |          |   |         |         |          |   |         |         |          |   |         |          |          |   |         |          |          |   |         |       |         |   |        |          |        |    |          |         |         |                                                                                                                                                                                                                                                                                                                                                                                                                                                                                                                                                                                                                                                                                                                                                                                                                                                                                                                                                                                                                                                                                                                                                                                                                                                                                                                                                                                                                                                                                                                                                                                                                                                                                                                                                                                                                                                                                                                                                                                                                                                                                                                                                                                                                                                                                                                                                                                                                                                                                                                                                                                                                  |           |         |         |         |         |         |          |          |          |          |          |          |          |          |          |          |          |          |          |          |          |          |          |          |          |          |          |          |          |          |          |          |          |          |          |          |          |          |          |          |          |          |          |          |          |          |          |          |          |          |          |          |          |          |          |          |          |          |          |          |          |          |          |          |          |          |          |          |          |          |          |          |          |          |          |          |          |          |           |           |           |           |           |           |           |           |           |           |           |           |           |           |           |           |           |           |           |           |           |           |           |           |           |           |           |           |           |           |           |           |           |           |           |           |           |           |           |
| Co                                                                                                                                                                                                                                                                                                                                                                                                                                                                                                                                                                                                                                                                                                                                                                                                                                                                                                                                                                                                                                                                                                                                                                                                                                                                                                                                                                                                                                                                                                                                                                                                                                                                                                                       | -0.07039          | -0.0585            | 0.52123  |   |   |   |         |         |          |   |        |         |          |   |         |        |          |   |         |         |         |   |         |         |          |   |         |        |          |   |         |         |          |   |         |          |          |   |         |         |          |   |         |          |          |   |         |         |          |   |         |          |          |   |         |          |          |   |         |         |          |   |         |         |          |   |         |         |          |   |         |          |          |   |         |          |          |   |         |       |         |   |        |          |        |    |          |         |         |                                                                                                                                                                                                                                                                                                                                                                                                                                                                                                                                                                                                                                                                                                                                                                                                                                                                                                                                                                                                                                                                                                                                                                                                                                                                                                                                                                                                                                                                                                                                                                                                                                                                                                                                                                                                                                                                                                                                                                                                                                                                                                                                                                                                                                                                                                                                                                                                                                                                                                                                                                                                                  |           |         |         |         |         |         |          |          |          |          |          |          |          |          |          |          |          |          |          |          |          |          |          |          |          |          |          |          |          |          |          |          |          |          |          |          |          |          |          |          |          |          |          |          |          |          |          |          |          |          |          |          |          |          |          |          |          |          |          |          |          |          |          |          |          |          |          |          |          |          |          |          |          |          |          |          |          |          |           |           |           |           |           |           |           |           |           |           |           |           |           |           |           |           |           |           |           |           |           |           |           |           |           |           |           |           |           |           |           |           |           |           |           |           |           |           |           |
| -396.4084                                                                                                                                                                                                                                                                                                                                                                                                                                                                                                                                                                                                                                                                                                                                                                                                                                                                                                                                                                                                                                                                                                                                                                                                                                                                                                                                                                                                                                                                                                                                                                                                                                                                                                                | 46.5312           | 53.7100            |          |   |   |   |         |         |          |   |        |         |          |   |         |        |          |   |         |         |         |   |         |         |          |   |         |        |          |   |         |         |          |   |         |          |          |   |         |         |          |   |         |          |          |   |         |         |          |   |         |          |          |   |         |          |          |   |         |         |          |   |         |         |          |   |         |         |          |   |         |          |          |   |         |          |          |   |         |       |         |   |        |          |        |    |          |         |         |                                                                                                                                                                                                                                                                                                                                                                                                                                                                                                                                                                                                                                                                                                                                                                                                                                                                                                                                                                                                                                                                                                                                                                                                                                                                                                                                                                                                                                                                                                                                                                                                                                                                                                                                                                                                                                                                                                                                                                                                                                                                                                                                                                                                                                                                                                                                                                                                                                                                                                                                                                                                                  |           |         |         |         |         |         |          |          |          |          |          |          |          |          |          |          |          |          |          |          |          |          |          |          |          |          |          |          |          |          |          |          |          |          |          |          |          |          |          |          |          |          |          |          |          |          |          |          |          |          |          |          |          |          |          |          |          |          |          |          |          |          |          |          |          |          |          |          |          |          |          |          |          |          |          |          |          |          |           |           |           |           |           |           |           |           |           |           |           |           |           |           |           |           |           |           |           |           |           |           |           |           |           |           |           |           |           |           |           |           |           |           |           |           |           |           |           |
| 57.7334                                                                                                                                                                                                                                                                                                                                                                                                                                                                                                                                                                                                                                                                                                                                                                                                                                                                                                                                                                                                                                                                                                                                                                                                                                                                                                                                                                                                                                                                                                                                                                                                                                                                                                                  | 74.1757           | 94.8006            |          |   |   |   |         |         |          |   |        |         |          |   |         |        |          |   |         |         |         |   |         |         |          |   |         |        |          |   |         |         |          |   |         |          |          |   |         |         |          |   |         |          |          |   |         |         |          |   |         |          |          |   |         |          |          |   |         |         |          |   |         |         |          |   |         |         |          |   |         |          |          |   |         |          |          |   |         |       |         |   |        |          |        |    |          |         |         |                                                                                                                                                                                                                                                                                                                                                                                                                                                                                                                                                                                                                                                                                                                                                                                                                                                                                                                                                                                                                                                                                                                                                                                                                                                                                                                                                                                                                                                                                                                                                                                                                                                                                                                                                                                                                                                                                                                                                                                                                                                                                                                                                                                                                                                                                                                                                                                                                                                                                                                                                                                                                  |           |         |         |         |         |         |          |          |          |          |          |          |          |          |          |          |          |          |          |          |          |          |          |          |          |          |          |          |          |          |          |          |          |          |          |          |          |          |          |          |          |          |          |          |          |          |          |          |          |          |          |          |          |          |          |          |          |          |          |          |          |          |          |          |          |          |          |          |          |          |          |          |          |          |          |          |          |          |           |           |           |           |           |           |           |           |           |           |           |           |           |           |           |           |           |           |           |           |           |           |           |           |           |           |           |           |           |           |           |           |           |           |           |           |           |           |           |
| 114.3984                                                                                                                                                                                                                                                                                                                                                                                                                                                                                                                                                                                                                                                                                                                                                                                                                                                                                                                                                                                                                                                                                                                                                                                                                                                                                                                                                                                                                                                                                                                                                                                                                                                                                                                 | 126.7765          | 144.6178           |          |   |   |   |         |         |          |   |        |         |          |   |         |        |          |   |         |         |         |   |         |         |          |   |         |        |          |   |         |         |          |   |         |          |          |   |         |         |          |   |         |          |          |   |         |         |          |   |         |          |          |   |         |          |          |   |         |         |          |   |         |         |          |   |         |         |          |   |         |          |          |   |         |          |          |   |         |       |         |   |        |          |        |    |          |         |         |                                                                                                                                                                                                                                                                                                                                                                                                                                                                                                                                                                                                                                                                                                                                                                                                                                                                                                                                                                                                                                                                                                                                                                                                                                                                                                                                                                                                                                                                                                                                                                                                                                                                                                                                                                                                                                                                                                                                                                                                                                                                                                                                                                                                                                                                                                                                                                                                                                                                                                                                                                                                                  |           |         |         |         |         |         |          |          |          |          |          |          |          |          |          |          |          |          |          |          |          |          |          |          |          |          |          |          |          |          |          |          |          |          |          |          |          |          |          |          |          |          |          |          |          |          |          |          |          |          |          |          |          |          |          |          |          |          |          |          |          |          |          |          |          |          |          |          |          |          |          |          |          |          |          |          |          |          |           |           |           |           |           |           |           |           |           |           |           |           |           |           |           |           |           |           |           |           |           |           |           |           |           |           |           |           |           |           |           |           |           |           |           |           |           |           |           |
| 169.8674                                                                                                                                                                                                                                                                                                                                                                                                                                                                                                                                                                                                                                                                                                                                                                                                                                                                                                                                                                                                                                                                                                                                                                                                                                                                                                                                                                                                                                                                                                                                                                                                                                                                                                                 | 199.6672          | 205.3921           |          |   |   |   |         |         |          |   |        |         |          |   |         |        |          |   |         |         |         |   |         |         |          |   |         |        |          |   |         |         |          |   |         |          |          |   |         |         |          |   |         |          |          |   |         |         |          |   |         |          |          |   |         |          |          |   |         |         |          |   |         |         |          |   |         |         |          |   |         |          |          |   |         |          |          |   |         |       |         |   |        |          |        |    |          |         |         |                                                                                                                                                                                                                                                                                                                                                                                                                                                                                                                                                                                                                                                                                                                                                                                                                                                                                                                                                                                                                                                                                                                                                                                                                                                                                                                                                                                                                                                                                                                                                                                                                                                                                                                                                                                                                                                                                                                                                                                                                                                                                                                                                                                                                                                                                                                                                                                                                                                                                                                                                                                                                  |           |         |         |         |         |         |          |          |          |          |          |          |          |          |          |          |          |          |          |          |          |          |          |          |          |          |          |          |          |          |          |          |          |          |          |          |          |          |          |          |          |          |          |          |          |          |          |          |          |          |          |          |          |          |          |          |          |          |          |          |          |          |          |          |          |          |          |          |          |          |          |          |          |          |          |          |          |          |           |           |           |           |           |           |           |           |           |           |           |           |           |           |           |           |           |           |           |           |           |           |           |           |           |           |           |           |           |           |           |           |           |           |           |           |           |           |           |
| 213.2953                                                                                                                                                                                                                                                                                                                                                                                                                                                                                                                                                                                                                                                                                                                                                                                                                                                                                                                                                                                                                                                                                                                                                                                                                                                                                                                                                                                                                                                                                                                                                                                                                                                                                                                 | 220.7477          | 236.0631           |          |   |   |   |         |         |          |   |        |         |          |   |         |        |          |   |         |         |         |   |         |         |          |   |         |        |          |   |         |         |          |   |         |          |          |   |         |         |          |   |         |          |          |   |         |         |          |   |         |          |          |   |         |          |          |   |         |         |          |   |         |         |          |   |         |         |          |   |         |          |          |   |         |          |          |   |         |       |         |   |        |          |        |    |          |         |         |                                                                                                                                                                                                                                                                                                                                                                                                                                                                                                                                                                                                                                                                                                                                                                                                                                                                                                                                                                                                                                                                                                                                                                                                                                                                                                                                                                                                                                                                                                                                                                                                                                                                                                                                                                                                                                                                                                                                                                                                                                                                                                                                                                                                                                                                                                                                                                                                                                                                                                                                                                                                                  |           |         |         |         |         |         |          |          |          |          |          |          |          |          |          |          |          |          |          |          |          |          |          |          |          |          |          |          |          |          |          |          |          |          |          |          |          |          |          |          |          |          |          |          |          |          |          |          |          |          |          |          |          |          |          |          |          |          |          |          |          |          |          |          |          |          |          |          |          |          |          |          |          |          |          |          |          |          |           |           |           |           |           |           |           |           |           |           |           |           |           |           |           |           |           |           |           |           |           |           |           |           |           |           |           |           |           |           |           |           |           |           |           |           |           |           |           |
| 241.8393                                                                                                                                                                                                                                                                                                                                                                                                                                                                                                                                                                                                                                                                                                                                                                                                                                                                                                                                                                                                                                                                                                                                                                                                                                                                                                                                                                                                                                                                                                                                                                                                                                                                                                                 | 251.3341          | 260.6167           |          |   |   |   |         |         |          |   |        |         |          |   |         |        |          |   |         |         |         |   |         |         |          |   |         |        |          |   |         |         |          |   |         |          |          |   |         |         |          |   |         |          |          |   |         |         |          |   |         |          |          |   |         |          |          |   |         |         |          |   |         |         |          |   |         |         |          |   |         |          |          |   |         |          |          |   |         |       |         |   |        |          |        |    |          |         |         |                                                                                                                                                                                                                                                                                                                                                                                                                                                                                                                                                                                                                                                                                                                                                                                                                                                                                                                                                                                                                                                                                                                                                                                                                                                                                                                                                                                                                                                                                                                                                                                                                                                                                                                                                                                                                                                                                                                                                                                                                                                                                                                                                                                                                                                                                                                                                                                                                                                                                                                                                                                                                  |           |         |         |         |         |         |          |          |          |          |          |          |          |          |          |          |          |          |          |          |          |          |          |          |          |          |          |          |          |          |          |          |          |          |          |          |          |          |          |          |          |          |          |          |          |          |          |          |          |          |          |          |          |          |          |          |          |          |          |          |          |          |          |          |          |          |          |          |          |          |          |          |          |          |          |          |          |          |           |           |           |           |           |           |           |           |           |           |           |           |           |           |           |           |           |           |           |           |           |           |           |           |           |           |           |           |           |           |           |           |           |           |           |           |           |           |           |
| 269.9634                                                                                                                                                                                                                                                                                                                                                                                                                                                                                                                                                                                                                                                                                                                                                                                                                                                                                                                                                                                                                                                                                                                                                                                                                                                                                                                                                                                                                                                                                                                                                                                                                                                                                                                 | 289.0643          | 320.8748           |          |   |   |   |         |         |          |   |        |         |          |   |         |        |          |   |         |         |         |   |         |         |          |   |         |        |          |   |         |         |          |   |         |          |          |   |         |         |          |   |         |          |          |   |         |         |          |   |         |          |          |   |         |          |          |   |         |         |          |   |         |         |          |   |         |         |          |   |         |          |          |   |         |          |          |   |         |       |         |   |        |          |        |    |          |         |         |                                                                                                                                                                                                                                                                                                                                                                                                                                                                                                                                                                                                                                                                                                                                                                                                                                                                                                                                                                                                                                                                                                                                                                                                                                                                                                                                                                                                                                                                                                                                                                                                                                                                                                                                                                                                                                                                                                                                                                                                                                                                                                                                                                                                                                                                                                                                                                                                                                                                                                                                                                                                                  |           |         |         |         |         |         |          |          |          |          |          |          |          |          |          |          |          |          |          |          |          |          |          |          |          |          |          |          |          |          |          |          |          |          |          |          |          |          |          |          |          |          |          |          |          |          |          |          |          |          |          |          |          |          |          |          |          |          |          |          |          |          |          |          |          |          |          |          |          |          |          |          |          |          |          |          |          |          |           |           |           |           |           |           |           |           |           |           |           |           |           |           |           |           |           |           |           |           |           |           |           |           |           |           |           |           |           |           |           |           |           |           |           |           |           |           |           |
| 328.3707                                                                                                                                                                                                                                                                                                                                                                                                                                                                                                                                                                                                                                                                                                                                                                                                                                                                                                                                                                                                                                                                                                                                                                                                                                                                                                                                                                                                                                                                                                                                                                                                                                                                                                                 | 335.3726          | 350.8343           |          |   |   |   |         |         |          |   |        |         |          |   |         |        |          |   |         |         |         |   |         |         |          |   |         |        |          |   |         |         |          |   |         |          |          |   |         |         |          |   |         |          |          |   |         |         |          |   |         |          |          |   |         |          |          |   |         |         |          |   |         |         |          |   |         |         |          |   |         |          |          |   |         |          |          |   |         |       |         |   |        |          |        |    |          |         |         |                                                                                                                                                                                                                                                                                                                                                                                                                                                                                                                                                                                                                                                                                                                                                                                                                                                                                                                                                                                                                                                                                                                                                                                                                                                                                                                                                                                                                                                                                                                                                                                                                                                                                                                                                                                                                                                                                                                                                                                                                                                                                                                                                                                                                                                                                                                                                                                                                                                                                                                                                                                                                  |           |         |         |         |         |         |          |          |          |          |          |          |          |          |          |          |          |          |          |          |          |          |          |          |          |          |          |          |          |          |          |          |          |          |          |          |          |          |          |          |          |          |          |          |          |          |          |          |          |          |          |          |          |          |          |          |          |          |          |          |          |          |          |          |          |          |          |          |          |          |          |          |          |          |          |          |          |          |           |           |           |           |           |           |           |           |           |           |           |           |           |           |           |           |           |           |           |           |           |           |           |           |           |           |           |           |           |           |           |           |           |           |           |           |           |           |           |
| 381.8266                                                                                                                                                                                                                                                                                                                                                                                                                                                                                                                                                                                                                                                                                                                                                                                                                                                                                                                                                                                                                                                                                                                                                                                                                                                                                                                                                                                                                                                                                                                                                                                                                                                                                                                 | 395.1608          | 397.7623           |          |   |   |   |         |         |          |   |        |         |          |   |         |        |          |   |         |         |         |   |         |         |          |   |         |        |          |   |         |         |          |   |         |          |          |   |         |         |          |   |         |          |          |   |         |         |          |   |         |          |          |   |         |          |          |   |         |         |          |   |         |         |          |   |         |         |          |   |         |          |          |   |         |          |          |   |         |       |         |   |        |          |        |    |          |         |         |                                                                                                                                                                                                                                                                                                                                                                                                                                                                                                                                                                                                                                                                                                                                                                                                                                                                                                                                                                                                                                                                                                                                                                                                                                                                                                                                                                                                                                                                                                                                                                                                                                                                                                                                                                                                                                                                                                                                                                                                                                                                                                                                                                                                                                                                                                                                                                                                                                                                                                                                                                                                                  |           |         |         |         |         |         |          |          |          |          |          |          |          |          |          |          |          |          |          |          |          |          |          |          |          |          |          |          |          |          |          |          |          |          |          |          |          |          |          |          |          |          |          |          |          |          |          |          |          |          |          |          |          |          |          |          |          |          |          |          |          |          |          |          |          |          |          |          |          |          |          |          |          |          |          |          |          |          |           |           |           |           |           |           |           |           |           |           |           |           |           |           |           |           |           |           |           |           |           |           |           |           |           |           |           |           |           |           |           |           |           |           |           |           |           |           |           |
| 437.3878                                                                                                                                                                                                                                                                                                                                                                                                                                                                                                                                                                                                                                                                                                                                                                                                                                                                                                                                                                                                                                                                                                                                                                                                                                                                                                                                                                                                                                                                                                                                                                                                                                                                                                                 | 442.0980          | 445.4839           |          |   |   |   |         |         |          |   |        |         |          |   |         |        |          |   |         |         |         |   |         |         |          |   |         |        |          |   |         |         |          |   |         |          |          |   |         |         |          |   |         |          |          |   |         |         |          |   |         |          |          |   |         |          |          |   |         |         |          |   |         |         |          |   |         |         |          |   |         |          |          |   |         |          |          |   |         |       |         |   |        |          |        |    |          |         |         |                                                                                                                                                                                                                                                                                                                                                                                                                                                                                                                                                                                                                                                                                                                                                                                                                                                                                                                                                                                                                                                                                                                                                                                                                                                                                                                                                                                                                                                                                                                                                                                                                                                                                                                                                                                                                                                                                                                                                                                                                                                                                                                                                                                                                                                                                                                                                                                                                                                                                                                                                                                                                  |           |         |         |         |         |         |          |          |          |          |          |          |          |          |          |          |          |          |          |          |          |          |          |          |          |          |          |          |          |          |          |          |          |          |          |          |          |          |          |          |          |          |          |          |          |          |          |          |          |          |          |          |          |          |          |          |          |          |          |          |          |          |          |          |          |          |          |          |          |          |          |          |          |          |          |          |          |          |           |           |           |           |           |           |           |           |           |           |           |           |           |           |           |           |           |           |           |           |           |           |           |           |           |           |           |           |           |           |           |           |           |           |           |           |           |           |           |
| 458.6071                                                                                                                                                                                                                                                                                                                                                                                                                                                                                                                                                                                                                                                                                                                                                                                                                                                                                                                                                                                                                                                                                                                                                                                                                                                                                                                                                                                                                                                                                                                                                                                                                                                                                                                 | 461.4549          | 472.1662           |          |   |   |   |         |         |          |   |        |         |          |   |         |        |          |   |         |         |         |   |         |         |          |   |         |        |          |   |         |         |          |   |         |          |          |   |         |         |          |   |         |          |          |   |         |         |          |   |         |          |          |   |         |          |          |   |         |         |          |   |         |         |          |   |         |         |          |   |         |          |          |   |         |          |          |   |         |       |         |   |        |          |        |    |          |         |         |                                                                                                                                                                                                                                                                                                                                                                                                                                                                                                                                                                                                                                                                                                                                                                                                                                                                                                                                                                                                                                                                                                                                                                                                                                                                                                                                                                                                                                                                                                                                                                                                                                                                                                                                                                                                                                                                                                                                                                                                                                                                                                                                                                                                                                                                                                                                                                                                                                                                                                                                                                                                                  |           |         |         |         |         |         |          |          |          |          |          |          |          |          |          |          |          |          |          |          |          |          |          |          |          |          |          |          |          |          |          |          |          |          |          |          |          |          |          |          |          |          |          |          |          |          |          |          |          |          |          |          |          |          |          |          |          |          |          |          |          |          |          |          |          |          |          |          |          |          |          |          |          |          |          |          |          |          |           |           |           |           |           |           |           |           |           |           |           |           |           |           |           |           |           |           |           |           |           |           |           |           |           |           |           |           |           |           |           |           |           |           |           |           |           |           |           |
| 482.6448                                                                                                                                                                                                                                                                                                                                                                                                                                                                                                                                                                                                                                                                                                                                                                                                                                                                                                                                                                                                                                                                                                                                                                                                                                                                                                                                                                                                                                                                                                                                                                                                                                                                                                                 | 485.6088          | 487.6987           |          |   |   |   |         |         |          |   |        |         |          |   |         |        |          |   |         |         |         |   |         |         |          |   |         |        |          |   |         |         |          |   |         |          |          |   |         |         |          |   |         |          |          |   |         |         |          |   |         |          |          |   |         |          |          |   |         |         |          |   |         |         |          |   |         |         |          |   |         |          |          |   |         |          |          |   |         |       |         |   |        |          |        |    |          |         |         |                                                                                                                                                                                                                                                                                                                                                                                                                                                                                                                                                                                                                                                                                                                                                                                                                                                                                                                                                                                                                                                                                                                                                                                                                                                                                                                                                                                                                                                                                                                                                                                                                                                                                                                                                                                                                                                                                                                                                                                                                                                                                                                                                                                                                                                                                                                                                                                                                                                                                                                                                                                                                  |           |         |         |         |         |         |          |          |          |          |          |          |          |          |          |          |          |          |          |          |          |          |          |          |          |          |          |          |          |          |          |          |          |          |          |          |          |          |          |          |          |          |          |          |          |          |          |          |          |          |          |          |          |          |          |          |          |          |          |          |          |          |          |          |          |          |          |          |          |          |          |          |          |          |          |          |          |          |           |           |           |           |           |           |           |           |           |           |           |           |           |           |           |           |           |           |           |           |           |           |           |           |           |           |           |           |           |           |           |           |           |           |           |           |           |           |           |
| 497.1213                                                                                                                                                                                                                                                                                                                                                                                                                                                                                                                                                                                                                                                                                                                                                                                                                                                                                                                                                                                                                                                                                                                                                                                                                                                                                                                                                                                                                                                                                                                                                                                                                                                                                                                 | 531.3851          | 545.3669           |          |   |   |   |         |         |          |   |        |         |          |   |         |        |          |   |         |         |         |   |         |         |          |   |         |        |          |   |         |         |          |   |         |          |          |   |         |         |          |   |         |          |          |   |         |         |          |   |         |          |          |   |         |          |          |   |         |         |          |   |         |         |          |   |         |         |          |   |         |          |          |   |         |          |          |   |         |       |         |   |        |          |        |    |          |         |         |                                                                                                                                                                                                                                                                                                                                                                                                                                                                                                                                                                                                                                                                                                                                                                                                                                                                                                                                                                                                                                                                                                                                                                                                                                                                                                                                                                                                                                                                                                                                                                                                                                                                                                                                                                                                                                                                                                                                                                                                                                                                                                                                                                                                                                                                                                                                                                                                                                                                                                                                                                                                                  |           |         |         |         |         |         |          |          |          |          |          |          |          |          |          |          |          |          |          |          |          |          |          |          |          |          |          |          |          |          |          |          |          |          |          |          |          |          |          |          |          |          |          |          |          |          |          |          |          |          |          |          |          |          |          |          |          |          |          |          |          |          |          |          |          |          |          |          |          |          |          |          |          |          |          |          |          |          |           |           |           |           |           |           |           |           |           |           |           |           |           |           |           |           |           |           |           |           |           |           |           |           |           |           |           |           |           |           |           |           |           |           |           |           |           |           |           |
| 568.2948                                                                                                                                                                                                                                                                                                                                                                                                                                                                                                                                                                                                                                                                                                                                                                                                                                                                                                                                                                                                                                                                                                                                                                                                                                                                                                                                                                                                                                                                                                                                                                                                                                                                                                                 | 577.2518          | 586.5172           |          |   |   |   |         |         |          |   |        |         |          |   |         |        |          |   |         |         |         |   |         |         |          |   |         |        |          |   |         |         |          |   |         |          |          |   |         |         |          |   |         |          |          |   |         |         |          |   |         |          |          |   |         |          |          |   |         |         |          |   |         |         |          |   |         |         |          |   |         |          |          |   |         |          |          |   |         |       |         |   |        |          |        |    |          |         |         |                                                                                                                                                                                                                                                                                                                                                                                                                                                                                                                                                                                                                                                                                                                                                                                                                                                                                                                                                                                                                                                                                                                                                                                                                                                                                                                                                                                                                                                                                                                                                                                                                                                                                                                                                                                                                                                                                                                                                                                                                                                                                                                                                                                                                                                                                                                                                                                                                                                                                                                                                                                                                  |           |         |         |         |         |         |          |          |          |          |          |          |          |          |          |          |          |          |          |          |          |          |          |          |          |          |          |          |          |          |          |          |          |          |          |          |          |          |          |          |          |          |          |          |          |          |          |          |          |          |          |          |          |          |          |          |          |          |          |          |          |          |          |          |          |          |          |          |          |          |          |          |          |          |          |          |          |          |           |           |           |           |           |           |           |           |           |           |           |           |           |           |           |           |           |           |           |           |           |           |           |           |           |           |           |           |           |           |           |           |           |           |           |           |           |           |           |
| 588.1961                                                                                                                                                                                                                                                                                                                                                                                                                                                                                                                                                                                                                                                                                                                                                                                                                                                                                                                                                                                                                                                                                                                                                                                                                                                                                                                                                                                                                                                                                                                                                                                                                                                                                                                 | 593.7234          | 595.0088           |          |   |   |   |         |         |          |   |        |         |          |   |         |        |          |   |         |         |         |   |         |         |          |   |         |        |          |   |         |         |          |   |         |          |          |   |         |         |          |   |         |          |          |   |         |         |          |   |         |          |          |   |         |          |          |   |         |         |          |   |         |         |          |   |         |         |          |   |         |          |          |   |         |          |          |   |         |       |         |   |        |          |        |    |          |         |         |                                                                                                                                                                                                                                                                                                                                                                                                                                                                                                                                                                                                                                                                                                                                                                                                                                                                                                                                                                                                                                                                                                                                                                                                                                                                                                                                                                                                                                                                                                                                                                                                                                                                                                                                                                                                                                                                                                                                                                                                                                                                                                                                                                                                                                                                                                                                                                                                                                                                                                                                                                                                                  |           |         |         |         |         |         |          |          |          |          |          |          |          |          |          |          |          |          |          |          |          |          |          |          |          |          |          |          |          |          |          |          |          |          |          |          |          |          |          |          |          |          |          |          |          |          |          |          |          |          |          |          |          |          |          |          |          |          |          |          |          |          |          |          |          |          |          |          |          |          |          |          |          |          |          |          |          |          |           |           |           |           |           |           |           |           |           |           |           |           |           |           |           |           |           |           |           |           |           |           |           |           |           |           |           |           |           |           |           |           |           |           |           |           |           |           |           |
| 619.5030                                                                                                                                                                                                                                                                                                                                                                                                                                                                                                                                                                                                                                                                                                                                                                                                                                                                                                                                                                                                                                                                                                                                                                                                                                                                                                                                                                                                                                                                                                                                                                                                                                                                                                                 | 652.1101          | 666.3433           |          |   |   |   |         |         |          |   |        |         |          |   |         |        |          |   |         |         |         |   |         |         |          |   |         |        |          |   |         |         |          |   |         |          |          |   |         |         |          |   |         |          |          |   |         |         |          |   |         |          |          |   |         |          |          |   |         |         |          |   |         |         |          |   |         |         |          |   |         |          |          |   |         |          |          |   |         |       |         |   |        |          |        |    |          |         |         |                                                                                                                                                                                                                                                                                                                                                                                                                                                                                                                                                                                                                                                                                                                                                                                                                                                                                                                                                                                                                                                                                                                                                                                                                                                                                                                                                                                                                                                                                                                                                                                                                                                                                                                                                                                                                                                                                                                                                                                                                                                                                                                                                                                                                                                                                                                                                                                                                                                                                                                                                                                                                  |           |         |         |         |         |         |          |          |          |          |          |          |          |          |          |          |          |          |          |          |          |          |          |          |          |          |          |          |          |          |          |          |          |          |          |          |          |          |          |          |          |          |          |          |          |          |          |          |          |          |          |          |          |          |          |          |          |          |          |          |          |          |          |          |          |          |          |          |          |          |          |          |          |          |          |          |          |          |           |           |           |           |           |           |           |           |           |           |           |           |           |           |           |           |           |           |           |           |           |           |           |           |           |           |           |           |           |           |           |           |           |           |           |           |           |           |           |
| 678.5731                                                                                                                                                                                                                                                                                                                                                                                                                                                                                                                                                                                                                                                                                                                                                                                                                                                                                                                                                                                                                                                                                                                                                                                                                                                                                                                                                                                                                                                                                                                                                                                                                                                                                                                 | 704.1935          | 707.3941           |          |   |   |   |         |         |          |   |        |         |          |   |         |        |          |   |         |         |         |   |         |         |          |   |         |        |          |   |         |         |          |   |         |          |          |   |         |         |          |   |         |          |          |   |         |         |          |   |         |          |          |   |         |          |          |   |         |         |          |   |         |         |          |   |         |         |          |   |         |          |          |   |         |          |          |   |         |       |         |   |        |          |        |    |          |         |         |                                                                                                                                                                                                                                                                                                                                                                                                                                                                                                                                                                                                                                                                                                                                                                                                                                                                                                                                                                                                                                                                                                                                                                                                                                                                                                                                                                                                                                                                                                                                                                                                                                                                                                                                                                                                                                                                                                                                                                                                                                                                                                                                                                                                                                                                                                                                                                                                                                                                                                                                                                                                                  |           |         |         |         |         |         |          |          |          |          |          |          |          |          |          |          |          |          |          |          |          |          |          |          |          |          |          |          |          |          |          |          |          |          |          |          |          |          |          |          |          |          |          |          |          |          |          |          |          |          |          |          |          |          |          |          |          |          |          |          |          |          |          |          |          |          |          |          |          |          |          |          |          |          |          |          |          |          |           |           |           |           |           |           |           |           |           |           |           |           |           |           |           |           |           |           |           |           |           |           |           |           |           |           |           |           |           |           |           |           |           |           |           |           |           |           |           |
| 714.9348                                                                                                                                                                                                                                                                                                                                                                                                                                                                                                                                                                                                                                                                                                                                                                                                                                                                                                                                                                                                                                                                                                                                                                                                                                                                                                                                                                                                                                                                                                                                                                                                                                                                                                                 | 718.9647          | 731.7122           |          |   |   |   |         |         |          |   |        |         |          |   |         |        |          |   |         |         |         |   |         |         |          |   |         |        |          |   |         |         |          |   |         |          |          |   |         |         |          |   |         |          |          |   |         |         |          |   |         |          |          |   |         |          |          |   |         |         |          |   |         |         |          |   |         |         |          |   |         |          |          |   |         |          |          |   |         |       |         |   |        |          |        |    |          |         |         |                                                                                                                                                                                                                                                                                                                                                                                                                                                                                                                                                                                                                                                                                                                                                                                                                                                                                                                                                                                                                                                                                                                                                                                                                                                                                                                                                                                                                                                                                                                                                                                                                                                                                                                                                                                                                                                                                                                                                                                                                                                                                                                                                                                                                                                                                                                                                                                                                                                                                                                                                                                                                  |           |         |         |         |         |         |          |          |          |          |          |          |          |          |          |          |          |          |          |          |          |          |          |          |          |          |          |          |          |          |          |          |          |          |          |          |          |          |          |          |          |          |          |          |          |          |          |          |          |          |          |          |          |          |          |          |          |          |          |          |          |          |          |          |          |          |          |          |          |          |          |          |          |          |          |          |          |          |           |           |           |           |           |           |           |           |           |           |           |           |           |           |           |           |           |           |           |           |           |           |           |           |           |           |           |           |           |           |           |           |           |           |           |           |           |           |           |
| 753.2962                                                                                                                                                                                                                                                                                                                                                                                                                                                                                                                                                                                                                                                                                                                                                                                                                                                                                                                                                                                                                                                                                                                                                                                                                                                                                                                                                                                                                                                                                                                                                                                                                                                                                                                 | 760.9753          | 770.0711           |          |   |   |   |         |         |          |   |        |         |          |   |         |        |          |   |         |         |         |   |         |         |          |   |         |        |          |   |         |         |          |   |         |          |          |   |         |         |          |   |         |          |          |   |         |         |          |   |         |          |          |   |         |          |          |   |         |         |          |   |         |         |          |   |         |         |          |   |         |          |          |   |         |          |          |   |         |       |         |   |        |          |        |    |          |         |         |                                                                                                                                                                                                                                                                                                                                                                                                                                                                                                                                                                                                                                                                                                                                                                                                                                                                                                                                                                                                                                                                                                                                                                                                                                                                                                                                                                                                                                                                                                                                                                                                                                                                                                                                                                                                                                                                                                                                                                                                                                                                                                                                                                                                                                                                                                                                                                                                                                                                                                                                                                                                                  |           |         |         |         |         |         |          |          |          |          |          |          |          |          |          |          |          |          |          |          |          |          |          |          |          |          |          |          |          |          |          |          |          |          |          |          |          |          |          |          |          |          |          |          |          |          |          |          |          |          |          |          |          |          |          |          |          |          |          |          |          |          |          |          |          |          |          |          |          |          |          |          |          |          |          |          |          |          |           |           |           |           |           |           |           |           |           |           |           |           |           |           |           |           |           |           |           |           |           |           |           |           |           |           |           |           |           |           |           |           |           |           |           |           |           |           |           |
| 782.6888                                                                                                                                                                                                                                                                                                                                                                                                                                                                                                                                                                                                                                                                                                                                                                                                                                                                                                                                                                                                                                                                                                                                                                                                                                                                                                                                                                                                                                                                                                                                                                                                                                                                                                                 | 784.3466          | 805.8839           |          |   |   |   |         |         |          |   |        |         |          |   |         |        |          |   |         |         |         |   |         |         |          |   |         |        |          |   |         |         |          |   |         |          |          |   |         |         |          |   |         |          |          |   |         |         |          |   |         |          |          |   |         |          |          |   |         |         |          |   |         |         |          |   |         |         |          |   |         |          |          |   |         |          |          |   |         |       |         |   |        |          |        |    |          |         |         |                                                                                                                                                                                                                                                                                                                                                                                                                                                                                                                                                                                                                                                                                                                                                                                                                                                                                                                                                                                                                                                                                                                                                                                                                                                                                                                                                                                                                                                                                                                                                                                                                                                                                                                                                                                                                                                                                                                                                                                                                                                                                                                                                                                                                                                                                                                                                                                                                                                                                                                                                                                                                  |           |         |         |         |         |         |          |          |          |          |          |          |          |          |          |          |          |          |          |          |          |          |          |          |          |          |          |          |          |          |          |          |          |          |          |          |          |          |          |          |          |          |          |          |          |          |          |          |          |          |          |          |          |          |          |          |          |          |          |          |          |          |          |          |          |          |          |          |          |          |          |          |          |          |          |          |          |          |           |           |           |           |           |           |           |           |           |           |           |           |           |           |           |           |           |           |           |           |           |           |           |           |           |           |           |           |           |           |           |           |           |           |           |           |           |           |           |
| 821.6482                                                                                                                                                                                                                                                                                                                                                                                                                                                                                                                                                                                                                                                                                                                                                                                                                                                                                                                                                                                                                                                                                                                                                                                                                                                                                                                                                                                                                                                                                                                                                                                                                                                                                                                 | 822.3717          | 835.4108           |          |   |   |   |         |         |          |   |        |         |          |   |         |        |          |   |         |         |         |   |         |         |          |   |         |        |          |   |         |         |          |   |         |          |          |   |         |         |          |   |         |          |          |   |         |         |          |   |         |          |          |   |         |          |          |   |         |         |          |   |         |         |          |   |         |         |          |   |         |          |          |   |         |          |          |   |         |       |         |   |        |          |        |    |          |         |         |                                                                                                                                                                                                                                                                                                                                                                                                                                                                                                                                                                                                                                                                                                                                                                                                                                                                                                                                                                                                                                                                                                                                                                                                                                                                                                                                                                                                                                                                                                                                                                                                                                                                                                                                                                                                                                                                                                                                                                                                                                                                                                                                                                                                                                                                                                                                                                                                                                                                                                                                                                                                                  |           |         |         |         |         |         |          |          |          |          |          |          |          |          |          |          |          |          |          |          |          |          |          |          |          |          |          |          |          |          |          |          |          |          |          |          |          |          |          |          |          |          |          |          |          |          |          |          |          |          |          |          |          |          |          |          |          |          |          |          |          |          |          |          |          |          |          |          |          |          |          |          |          |          |          |          |          |          |           |           |           |           |           |           |           |           |           |           |           |           |           |           |           |           |           |           |           |           |           |           |           |           |           |           |           |           |           |           |           |           |           |           |           |           |           |           |           |
| 845.1884                                                                                                                                                                                                                                                                                                                                                                                                                                                                                                                                                                                                                                                                                                                                                                                                                                                                                                                                                                                                                                                                                                                                                                                                                                                                                                                                                                                                                                                                                                                                                                                                                                                                                                                 | 852.9244          | 860.2266           |          |   |   |   |         |         |          |   |        |         |          |   |         |        |          |   |         |         |         |   |         |         |          |   |         |        |          |   |         |         |          |   |         |          |          |   |         |         |          |   |         |          |          |   |         |         |          |   |         |          |          |   |         |          |          |   |         |         |          |   |         |         |          |   |         |         |          |   |         |          |          |   |         |          |          |   |         |       |         |   |        |          |        |    |          |         |         |                                                                                                                                                                                                                                                                                                                                                                                                                                                                                                                                                                                                                                                                                                                                                                                                                                                                                                                                                                                                                                                                                                                                                                                                                                                                                                                                                                                                                                                                                                                                                                                                                                                                                                                                                                                                                                                                                                                                                                                                                                                                                                                                                                                                                                                                                                                                                                                                                                                                                                                                                                                                                  |           |         |         |         |         |         |          |          |          |          |          |          |          |          |          |          |          |          |          |          |          |          |          |          |          |          |          |          |          |          |          |          |          |          |          |          |          |          |          |          |          |          |          |          |          |          |          |          |          |          |          |          |          |          |          |          |          |          |          |          |          |          |          |          |          |          |          |          |          |          |          |          |          |          |          |          |          |          |           |           |           |           |           |           |           |           |           |           |           |           |           |           |           |           |           |           |           |           |           |           |           |           |           |           |           |           |           |           |           |           |           |           |           |           |           |           |           |
| 872.6674                                                                                                                                                                                                                                                                                                                                                                                                                                                                                                                                                                                                                                                                                                                                                                                                                                                                                                                                                                                                                                                                                                                                                                                                                                                                                                                                                                                                                                                                                                                                                                                                                                                                                                                 | 878.9294          | 881.6408           |          |   |   |   |         |         |          |   |        |         |          |   |         |        |          |   |         |         |         |   |         |         |          |   |         |        |          |   |         |         |          |   |         |          |          |   |         |         |          |   |         |          |          |   |         |         |          |   |         |          |          |   |         |          |          |   |         |         |          |   |         |         |          |   |         |         |          |   |         |          |          |   |         |          |          |   |         |       |         |   |        |          |        |    |          |         |         |                                                                                                                                                                                                                                                                                                                                                                                                                                                                                                                                                                                                                                                                                                                                                                                                                                                                                                                                                                                                                                                                                                                                                                                                                                                                                                                                                                                                                                                                                                                                                                                                                                                                                                                                                                                                                                                                                                                                                                                                                                                                                                                                                                                                                                                                                                                                                                                                                                                                                                                                                                                                                  |           |         |         |         |         |         |          |          |          |          |          |          |          |          |          |          |          |          |          |          |          |          |          |          |          |          |          |          |          |          |          |          |          |          |          |          |          |          |          |          |          |          |          |          |          |          |          |          |          |          |          |          |          |          |          |          |          |          |          |          |          |          |          |          |          |          |          |          |          |          |          |          |          |          |          |          |          |          |           |           |           |           |           |           |           |           |           |           |           |           |           |           |           |           |           |           |           |           |           |           |           |           |           |           |           |           |           |           |           |           |           |           |           |           |           |           |           |
| 905.0770                                                                                                                                                                                                                                                                                                                                                                                                                                                                                                                                                                                                                                                                                                                                                                                                                                                                                                                                                                                                                                                                                                                                                                                                                                                                                                                                                                                                                                                                                                                                                                                                                                                                                                                 | 914.9868          | 917.5290           |          |   |   |   |         |         |          |   |        |         |          |   |         |        |          |   |         |         |         |   |         |         |          |   |         |        |          |   |         |         |          |   |         |          |          |   |         |         |          |   |         |          |          |   |         |         |          |   |         |          |          |   |         |          |          |   |         |         |          |   |         |         |          |   |         |         |          |   |         |          |          |   |         |          |          |   |         |       |         |   |        |          |        |    |          |         |         |                                                                                                                                                                                                                                                                                                                                                                                                                                                                                                                                                                                                                                                                                                                                                                                                                                                                                                                                                                                                                                                                                                                                                                                                                                                                                                                                                                                                                                                                                                                                                                                                                                                                                                                                                                                                                                                                                                                                                                                                                                                                                                                                                                                                                                                                                                                                                                                                                                                                                                                                                                                                                  |           |         |         |         |         |         |          |          |          |          |          |          |          |          |          |          |          |          |          |          |          |          |          |          |          |          |          |          |          |          |          |          |          |          |          |          |          |          |          |          |          |          |          |          |          |          |          |          |          |          |          |          |          |          |          |          |          |          |          |          |          |          |          |          |          |          |          |          |          |          |          |          |          |          |          |          |          |          |           |           |           |           |           |           |           |           |           |           |           |           |           |           |           |           |           |           |           |           |           |           |           |           |           |           |           |           |           |           |           |           |           |           |           |           |           |           |           |
| 942.2464                                                                                                                                                                                                                                                                                                                                                                                                                                                                                                                                                                                                                                                                                                                                                                                                                                                                                                                                                                                                                                                                                                                                                                                                                                                                                                                                                                                                                                                                                                                                                                                                                                                                                                                 | 944.2455          | 981.3027           |          |   |   |   |         |         |          |   |        |         |          |   |         |        |          |   |         |         |         |   |         |         |          |   |         |        |          |   |         |         |          |   |         |          |          |   |         |         |          |   |         |          |          |   |         |         |          |   |         |          |          |   |         |          |          |   |         |         |          |   |         |         |          |   |         |         |          |   |         |          |          |   |         |          |          |   |         |       |         |   |        |          |        |    |          |         |         |                                                                                                                                                                                                                                                                                                                                                                                                                                                                                                                                                                                                                                                                                                                                                                                                                                                                                                                                                                                                                                                                                                                                                                                                                                                                                                                                                                                                                                                                                                                                                                                                                                                                                                                                                                                                                                                                                                                                                                                                                                                                                                                                                                                                                                                                                                                                                                                                                                                                                                                                                                                                                  |           |         |         |         |         |         |          |          |          |          |          |          |          |          |          |          |          |          |          |          |          |          |          |          |          |          |          |          |          |          |          |          |          |          |          |          |          |          |          |          |          |          |          |          |          |          |          |          |          |          |          |          |          |          |          |          |          |          |          |          |          |          |          |          |          |          |          |          |          |          |          |          |          |          |          |          |          |          |           |           |           |           |           |           |           |           |           |           |           |           |           |           |           |           |           |           |           |           |           |           |           |           |           |           |           |           |           |           |           |           |           |           |           |           |           |           |           |
| 987.6541                                                                                                                                                                                                                                                                                                                                                                                                                                                                                                                                                                                                                                                                                                                                                                                                                                                                                                                                                                                                                                                                                                                                                                                                                                                                                                                                                                                                                                                                                                                                                                                                                                                                                                                 | 998.6506          | 998.7851           |          |   |   |   |         |         |          |   |        |         |          |   |         |        |          |   |         |         |         |   |         |         |          |   |         |        |          |   |         |         |          |   |         |          |          |   |         |         |          |   |         |          |          |   |         |         |          |   |         |          |          |   |         |          |          |   |         |         |          |   |         |         |          |   |         |         |          |   |         |          |          |   |         |          |          |   |         |       |         |   |        |          |        |    |          |         |         |                                                                                                                                                                                                                                                                                                                                                                                                                                                                                                                                                                                                                                                                                                                                                                                                                                                                                                                                                                                                                                                                                                                                                                                                                                                                                                                                                                                                                                                                                                                                                                                                                                                                                                                                                                                                                                                                                                                                                                                                                                                                                                                                                                                                                                                                                                                                                                                                                                                                                                                                                                                                                  |           |         |         |         |         |         |          |          |          |          |          |          |          |          |          |          |          |          |          |          |          |          |          |          |          |          |          |          |          |          |          |          |          |          |          |          |          |          |          |          |          |          |          |          |          |          |          |          |          |          |          |          |          |          |          |          |          |          |          |          |          |          |          |          |          |          |          |          |          |          |          |          |          |          |          |          |          |          |           |           |           |           |           |           |           |           |           |           |           |           |           |           |           |           |           |           |           |           |           |           |           |           |           |           |           |           |           |           |           |           |           |           |           |           |           |           |           |
| 1017.8048                                                                                                                                                                                                                                                                                                                                                                                                                                                                                                                                                                                                                                                                                                                                                                                                                                                                                                                                                                                                                                                                                                                                                                                                                                                                                                                                                                                                                                                                                                                                                                                                                                                                                                                | 1020.5324         | 1023.1019          |          |   |   |   |         |         |          |   |        |         |          |   |         |        |          |   |         |         |         |   |         |         |          |   |         |        |          |   |         |         |          |   |         |          |          |   |         |         |          |   |         |          |          |   |         |         |          |   |         |          |          |   |         |          |          |   |         |         |          |   |         |         |          |   |         |         |          |   |         |          |          |   |         |          |          |   |         |       |         |   |        |          |        |    |          |         |         |                                                                                                                                                                                                                                                                                                                                                                                                                                                                                                                                                                                                                                                                                                                                                                                                                                                                                                                                                                                                                                                                                                                                                                                                                                                                                                                                                                                                                                                                                                                                                                                                                                                                                                                                                                                                                                                                                                                                                                                                                                                                                                                                                                                                                                                                                                                                                                                                                                                                                                                                                                                                                  |           |         |         |         |         |         |          |          |          |          |          |          |          |          |          |          |          |          |          |          |          |          |          |          |          |          |          |          |          |          |          |          |          |          |          |          |          |          |          |          |          |          |          |          |          |          |          |          |          |          |          |          |          |          |          |          |          |          |          |          |          |          |          |          |          |          |          |          |          |          |          |          |          |          |          |          |          |          |           |           |           |           |           |           |           |           |           |           |           |           |           |           |           |           |           |           |           |           |           |           |           |           |           |           |           |           |           |           |           |           |           |           |           |           |           |           |           |
| 1026.5993                                                                                                                                                                                                                                                                                                                                                                                                                                                                                                                                                                                                                                                                                                                                                                                                                                                                                                                                                                                                                                                                                                                                                                                                                                                                                                                                                                                                                                                                                                                                                                                                                                                                                                                | 1027.6339         | 1058.8892          |          |   |   |   |         |         |          |   |        |         |          |   |         |        |          |   |         |         |         |   |         |         |          |   |         |        |          |   |         |         |          |   |         |          |          |   |         |         |          |   |         |          |          |   |         |         |          |   |         |          |          |   |         |          |          |   |         |         |          |   |         |         |          |   |         |         |          |   |         |          |          |   |         |          |          |   |         |       |         |   |        |          |        |    |          |         |         |                                                                                                                                                                                                                                                                                                                                                                                                                                                                                                                                                                                                                                                                                                                                                                                                                                                                                                                                                                                                                                                                                                                                                                                                                                                                                                                                                                                                                                                                                                                                                                                                                                                                                                                                                                                                                                                                                                                                                                                                                                                                                                                                                                                                                                                                                                                                                                                                                                                                                                                                                                                                                  |           |         |         |         |         |         |          |          |          |          |          |          |          |          |          |          |          |          |          |          |          |          |          |          |          |          |          |          |          |          |          |          |          |          |          |          |          |          |          |          |          |          |          |          |          |          |          |          |          |          |          |          |          |          |          |          |          |          |          |          |          |          |          |          |          |          |          |          |          |          |          |          |          |          |          |          |          |          |           |           |           |           |           |           |           |           |           |           |           |           |           |           |           |           |           |           |           |           |           |           |           |           |           |           |           |           |           |           |           |           |           |           |           |           |           |           |           |
| 1106.5062                                                                                                                                                                                                                                                                                                                                                                                                                                                                                                                                                                                                                                                                                                                                                                                                                                                                                                                                                                                                                                                                                                                                                                                                                                                                                                                                                                                                                                                                                                                                                                                                                                                                                                                | 1132.9831         | 1135.9678          |          |   |   |   |         |         |          |   |        |         |          |   |         |        |          |   |         |         |         |   |         |         |          |   |         |        |          |   |         |         |          |   |         |          |          |   |         |         |          |   |         |          |          |   |         |         |          |   |         |          |          |   |         |          |          |   |         |         |          |   |         |         |          |   |         |         |          |   |         |          |          |   |         |          |          |   |         |       |         |   |        |          |        |    |          |         |         |                                                                                                                                                                                                                                                                                                                                                                                                                                                                                                                                                                                                                                                                                                                                                                                                                                                                                                                                                                                                                                                                                                                                                                                                                                                                                                                                                                                                                                                                                                                                                                                                                                                                                                                                                                                                                                                                                                                                                                                                                                                                                                                                                                                                                                                                                                                                                                                                                                                                                                                                                                                                                  |           |         |         |         |         |         |          |          |          |          |          |          |          |          |          |          |          |          |          |          |          |          |          |          |          |          |          |          |          |          |          |          |          |          |          |          |          |          |          |          |          |          |          |          |          |          |          |          |          |          |          |          |          |          |          |          |          |          |          |          |          |          |          |          |          |          |          |          |          |          |          |          |          |          |          |          |          |          |           |           |           |           |           |           |           |           |           |           |           |           |           |           |           |           |           |           |           |           |           |           |           |           |           |           |           |           |           |           |           |           |           |           |           |           |           |           |           |
| 1141.7808                                                                                                                                                                                                                                                                                                                                                                                                                                                                                                                                                                                                                                                                                                                                                                                                                                                                                                                                                                                                                                                                                                                                                                                                                                                                                                                                                                                                                                                                                                                                                                                                                                                                                                                | 1151.3902         | 1173.9131          |          |   |   |   |         |         |          |   |        |         |          |   |         |        |          |   |         |         |         |   |         |         |          |   |         |        |          |   |         |         |          |   |         |          |          |   |         |         |          |   |         |          |          |   |         |         |          |   |         |          |          |   |         |          |          |   |         |         |          |   |         |         |          |   |         |         |          |   |         |          |          |   |         |          |          |   |         |       |         |   |        |          |        |    |          |         |         |                                                                                                                                                                                                                                                                                                                                                                                                                                                                                                                                                                                                                                                                                                                                                                                                                                                                                                                                                                                                                                                                                                                                                                                                                                                                                                                                                                                                                                                                                                                                                                                                                                                                                                                                                                                                                                                                                                                                                                                                                                                                                                                                                                                                                                                                                                                                                                                                                                                                                                                                                                                                                  |           |         |         |         |         |         |          |          |          |          |          |          |          |          |          |          |          |          |          |          |          |          |          |          |          |          |          |          |          |          |          |          |          |          |          |          |          |          |          |          |          |          |          |          |          |          |          |          |          |          |          |          |          |          |          |          |          |          |          |          |          |          |          |          |          |          |          |          |          |          |          |          |          |          |          |          |          |          |           |           |           |           |           |           |           |           |           |           |           |           |           |           |           |           |           |           |           |           |           |           |           |           |           |           |           |           |           |           |           |           |           |           |           |           |           |           |           |
| 1180.7891                                                                                                                                                                                                                                                                                                                                                                                                                                                                                                                                                                                                                                                                                                                                                                                                                                                                                                                                                                                                                                                                                                                                                                                                                                                                                                                                                                                                                                                                                                                                                                                                                                                                                                                | 1183.1549         | 1190.0308          |          |   |   |   |         |         |          |   |        |         |          |   |         |        |          |   |         |         |         |   |         |         |          |   |         |        |          |   |         |         |          |   |         |          |          |   |         |         |          |   |         |          |          |   |         |         |          |   |         |          |          |   |         |          |          |   |         |         |          |   |         |         |          |   |         |         |          |   |         |          |          |   |         |          |          |   |         |       |         |   |        |          |        |    |          |         |         |                                                                                                                                                                                                                                                                                                                                                                                                                                                                                                                                                                                                                                                                                                                                                                                                                                                                                                                                                                                                                                                                                                                                                                                                                                                                                                                                                                                                                                                                                                                                                                                                                                                                                                                                                                                                                                                                                                                                                                                                                                                                                                                                                                                                                                                                                                                                                                                                                                                                                                                                                                                                                  |           |         |         |         |         |         |          |          |          |          |          |          |          |          |          |          |          |          |          |          |          |          |          |          |          |          |          |          |          |          |          |          |          |          |          |          |          |          |          |          |          |          |          |          |          |          |          |          |          |          |          |          |          |          |          |          |          |          |          |          |          |          |          |          |          |          |          |          |          |          |          |          |          |          |          |          |          |          |           |           |           |           |           |           |           |           |           |           |           |           |           |           |           |           |           |           |           |           |           |           |           |           |           |           |           |           |           |           |           |           |           |           |           |           |           |           |           |
| 1224.7558                                                                                                                                                                                                                                                                                                                                                                                                                                                                                                                                                                                                                                                                                                                                                                                                                                                                                                                                                                                                                                                                                                                                                                                                                                                                                                                                                                                                                                                                                                                                                                                                                                                                                                                | 1233.2596         | 1240.1209          |          |   |   |   |         |         |          |   |        |         |          |   |         |        |          |   |         |         |         |   |         |         |          |   |         |        |          |   |         |         |          |   |         |          |          |   |         |         |          |   |         |          |          |   |         |         |          |   |         |          |          |   |         |          |          |   |         |         |          |   |         |         |          |   |         |         |          |   |         |          |          |   |         |          |          |   |         |       |         |   |        |          |        |    |          |         |         |                                                                                                                                                                                                                                                                                                                                                                                                                                                                                                                                                                                                                                                                                                                                                                                                                                                                                                                                                                                                                                                                                                                                                                                                                                                                                                                                                                                                                                                                                                                                                                                                                                                                                                                                                                                                                                                                                                                                                                                                                                                                                                                                                                                                                                                                                                                                                                                                                                                                                                                                                                                                                  |           |         |         |         |         |         |          |          |          |          |          |          |          |          |          |          |          |          |          |          |          |          |          |          |          |          |          |          |          |          |          |          |          |          |          |          |          |          |          |          |          |          |          |          |          |          |          |          |          |          |          |          |          |          |          |          |          |          |          |          |          |          |          |          |          |          |          |          |          |          |          |          |          |          |          |          |          |          |           |           |           |           |           |           |           |           |           |           |           |           |           |           |           |           |           |           |           |           |           |           |           |           |           |           |           |           |           |           |           |           |           |           |           |           |           |           |           |
| 1245.6183                                                                                                                                                                                                                                                                                                                                                                                                                                                                                                                                                                                                                                                                                                                                                                                                                                                                                                                                                                                                                                                                                                                                                                                                                                                                                                                                                                                                                                                                                                                                                                                                                                                                                                                | 1250.4412         | 1260.9447          |          |   |   |   |         |         |          |   |        |         |          |   |         |        |          |   |         |         |         |   |         |         |          |   |         |        |          |   |         |         |          |   |         |          |          |   |         |         |          |   |         |          |          |   |         |         |          |   |         |          |          |   |         |          |          |   |         |         |          |   |         |         |          |   |         |         |          |   |         |          |          |   |         |          |          |   |         |       |         |   |        |          |        |    |          |         |         |                                                                                                                                                                                                                                                                                                                                                                                                                                                                                                                                                                                                                                                                                                                                                                                                                                                                                                                                                                                                                                                                                                                                                                                                                                                                                                                                                                                                                                                                                                                                                                                                                                                                                                                                                                                                                                                                                                                                                                                                                                                                                                                                                                                                                                                                                                                                                                                                                                                                                                                                                                                                                  |           |         |         |         |         |         |          |          |          |          |          |          |          |          |          |          |          |          |          |          |          |          |          |          |          |          |          |          |          |          |          |          |          |          |          |          |          |          |          |          |          |          |          |          |          |          |          |          |          |          |          |          |          |          |          |          |          |          |          |          |          |          |          |          |          |          |          |          |          |          |          |          |          |          |          |          |          |          |           |           |           |           |           |           |           |           |           |           |           |           |           |           |           |           |           |           |           |           |           |           |           |           |           |           |           |           |           |           |           |           |           |           |           |           |           |           |           |
| 1262.2282                                                                                                                                                                                                                                                                                                                                                                                                                                                                                                                                                                                                                                                                                                                                                                                                                                                                                                                                                                                                                                                                                                                                                                                                                                                                                                                                                                                                                                                                                                                                                                                                                                                                                                                | 1275.6099         | 1275.9698          |          |   |   |   |         |         |          |   |        |         |          |   |         |        |          |   |         |         |         |   |         |         |          |   |         |        |          |   |         |         |          |   |         |          |          |   |         |         |          |   |         |          |          |   |         |         |          |   |         |          |          |   |         |          |          |   |         |         |          |   |         |         |          |   |         |         |          |   |         |          |          |   |         |          |          |   |         |       |         |   |        |          |        |    |          |         |         |                                                                                                                                                                                                                                                                                                                                                                                                                                                                                                                                                                                                                                                                                                                                                                                                                                                                                                                                                                                                                                                                                                                                                                                                                                                                                                                                                                                                                                                                                                                                                                                                                                                                                                                                                                                                                                                                                                                                                                                                                                                                                                                                                                                                                                                                                                                                                                                                                                                                                                                                                                                                                  |           |         |         |         |         |         |          |          |          |          |          |          |          |          |          |          |          |          |          |          |          |          |          |          |          |          |          |          |          |          |          |          |          |          |          |          |          |          |          |          |          |          |          |          |          |          |          |          |          |          |          |          |          |          |          |          |          |          |          |          |          |          |          |          |          |          |          |          |          |          |          |          |          |          |          |          |          |          |           |           |           |           |           |           |           |           |           |           |           |           |           |           |           |           |           |           |           |           |           |           |           |           |           |           |           |           |           |           |           |           |           |           |           |           |           |           |           |
| 1297.2499                                                                                                                                                                                                                                                                                                                                                                                                                                                                                                                                                                                                                                                                                                                                                                                                                                                                                                                                                                                                                                                                                                                                                                                                                                                                                                                                                                                                                                                                                                                                                                                                                                                                                                                | 1324.1744         | 1344.7335          |          |   |   |   |         |         |          |   |        |         |          |   |         |        |          |   |         |         |         |   |         |         |          |   |         |        |          |   |         |         |          |   |         |          |          |   |         |         |          |   |         |          |          |   |         |         |          |   |         |          |          |   |         |          |          |   |         |         |          |   |         |         |          |   |         |         |          |   |         |          |          |   |         |          |          |   |         |       |         |   |        |          |        |    |          |         |         |                                                                                                                                                                                                                                                                                                                                                                                                                                                                                                                                                                                                                                                                                                                                                                                                                                                                                                                                                                                                                                                                                                                                                                                                                                                                                                                                                                                                                                                                                                                                                                                                                                                                                                                                                                                                                                                                                                                                                                                                                                                                                                                                                                                                                                                                                                                                                                                                                                                                                                                                                                                                                  |           |         |         |         |         |         |          |          |          |          |          |          |          |          |          |          |          |          |          |          |          |          |          |          |          |          |          |          |          |          |          |          |          |          |          |          |          |          |          |          |          |          |          |          |          |          |          |          |          |          |          |          |          |          |          |          |          |          |          |          |          |          |          |          |          |          |          |          |          |          |          |          |          |          |          |          |          |          |           |           |           |           |           |           |           |           |           |           |           |           |           |           |           |           |           |           |           |           |           |           |           |           |           |           |           |           |           |           |           |           |           |           |           |           |           |           |           |
| 1374.5739                                                                                                                                                                                                                                                                                                                                                                                                                                                                                                                                                                                                                                                                                                                                                                                                                                                                                                                                                                                                                                                                                                                                                                                                                                                                                                                                                                                                                                                                                                                                                                                                                                                                                                                | 1391.8229         | 1393.5517          |          |   |   |   |         |         |          |   |        |         |          |   |         |        |          |   |         |         |         |   |         |         |          |   |         |        |          |   |         |         |          |   |         |          |          |   |         |         |          |   |         |          |          |   |         |         |          |   |         |          |          |   |         |          |          |   |         |         |          |   |         |         |          |   |         |         |          |   |         |          |          |   |         |          |          |   |         |       |         |   |        |          |        |    |          |         |         |                                                                                                                                                                                                                                                                                                                                                                                                                                                                                                                                                                                                                                                                                                                                                                                                                                                                                                                                                                                                                                                                                                                                                                                                                                                                                                                                                                                                                                                                                                                                                                                                                                                                                                                                                                                                                                                                                                                                                                                                                                                                                                                                                                                                                                                                                                                                                                                                                                                                                                                                                                                                                  |           |         |         |         |         |         |          |          |          |          |          |          |          |          |          |          |          |          |          |          |          |          |          |          |          |          |          |          |          |          |          |          |          |          |          |          |          |          |          |          |          |          |          |          |          |          |          |          |          |          |          |          |          |          |          |          |          |          |          |          |          |          |          |          |          |          |          |          |          |          |          |          |          |          |          |          |          |          |           |           |           |           |           |           |           |           |           |           |           |           |           |           |           |           |           |           |           |           |           |           |           |           |           |           |           |           |           |           |           |           |           |           |           |           |           |           |           |
| 1401.1008                                                                                                                                                                                                                                                                                                                                                                                                                                                                                                                                                                                                                                                                                                                                                                                                                                                                                                                                                                                                                                                                                                                                                                                                                                                                                                                                                                                                                                                                                                                                                                                                                                                                                                                | 1414.4898         | 1423.1949          |          |   |   |   |         |         |          |   |        |         |          |   |         |        |          |   |         |         |         |   |         |         |          |   |         |        |          |   |         |         |          |   |         |          |          |   |         |         |          |   |         |          |          |   |         |         |          |   |         |          |          |   |         |          |          |   |         |         |          |   |         |         |          |   |         |         |          |   |         |          |          |   |         |          |          |   |         |       |         |   |        |          |        |    |          |         |         |                                                                                                                                                                                                                                                                                                                                                                                                                                                                                                                                                                                                                                                                                                                                                                                                                                                                                                                                                                                                                                                                                                                                                                                                                                                                                                                                                                                                                                                                                                                                                                                                                                                                                                                                                                                                                                                                                                                                                                                                                                                                                                                                                                                                                                                                                                                                                                                                                                                                                                                                                                                                                  |           |         |         |         |         |         |          |          |          |          |          |          |          |          |          |          |          |          |          |          |          |          |          |          |          |          |          |          |          |          |          |          |          |          |          |          |          |          |          |          |          |          |          |          |          |          |          |          |          |          |          |          |          |          |          |          |          |          |          |          |          |          |          |          |          |          |          |          |          |          |          |          |          |          |          |          |          |          |           |           |           |           |           |           |           |           |           |           |           |           |           |           |           |           |           |           |           |           |           |           |           |           |           |           |           |           |           |           |           |           |           |           |           |           |           |           |           |
| 1432.4325                                                                                                                                                                                                                                                                                                                                                                                                                                                                                                                                                                                                                                                                                                                                                                                                                                                                                                                                                                                                                                                                                                                                                                                                                                                                                                                                                                                                                                                                                                                                                                                                                                                                                                                | 1440.1317         | 1445.1293          |          |   |   |   |         |         |          |   |        |         |          |   |         |        |          |   |         |         |         |   |         |         |          |   |         |        |          |   |         |         |          |   |         |          |          |   |         |         |          |   |         |          |          |   |         |         |          |   |         |          |          |   |         |          |          |   |         |         |          |   |         |         |          |   |         |         |          |   |         |          |          |   |         |          |          |   |         |       |         |   |        |          |        |    |          |         |         |                                                                                                                                                                                                                                                                                                                                                                                                                                                                                                                                                                                                                                                                                                                                                                                                                                                                                                                                                                                                                                                                                                                                                                                                                                                                                                                                                                                                                                                                                                                                                                                                                                                                                                                                                                                                                                                                                                                                                                                                                                                                                                                                                                                                                                                                                                                                                                                                                                                                                                                                                                                                                  |           |         |         |         |         |         |          |          |          |          |          |          |          |          |          |          |          |          |          |          |          |          |          |          |          |          |          |          |          |          |          |          |          |          |          |          |          |          |          |          |          |          |          |          |          |          |          |          |          |          |          |          |          |          |          |          |          |          |          |          |          |          |          |          |          |          |          |          |          |          |          |          |          |          |          |          |          |          |           |           |           |           |           |           |           |           |           |           |           |           |           |           |           |           |           |           |           |           |           |           |           |           |           |           |           |           |           |           |           |           |           |           |           |           |           |           |           |
| 1457.0510                                                                                                                                                                                                                                                                                                                                                                                                                                                                                                                                                                                                                                                                                                                                                                                                                                                                                                                                                                                                                                                                                                                                                                                                                                                                                                                                                                                                                                                                                                                                                                                                                                                                                                                | 1463.8627         | 1471.6909          |          |   |   |   |         |         |          |   |        |         |          |   |         |        |          |   |         |         |         |   |         |         |          |   |         |        |          |   |         |         |          |   |         |          |          |   |         |         |          |   |         |          |          |   |         |         |          |   |         |          |          |   |         |          |          |   |         |         |          |   |         |         |          |   |         |         |          |   |         |          |          |   |         |          |          |   |         |       |         |   |        |          |        |    |          |         |         |                                                                                                                                                                                                                                                                                                                                                                                                                                                                                                                                                                                                                                                                                                                                                                                                                                                                                                                                                                                                                                                                                                                                                                                                                                                                                                                                                                                                                                                                                                                                                                                                                                                                                                                                                                                                                                                                                                                                                                                                                                                                                                                                                                                                                                                                                                                                                                                                                                                                                                                                                                                                                  |           |         |         |         |         |         |          |          |          |          |          |          |          |          |          |          |          |          |          |          |          |          |          |          |          |          |          |          |          |          |          |          |          |          |          |          |          |          |          |          |          |          |          |          |          |          |          |          |          |          |          |          |          |          |          |          |          |          |          |          |          |          |          |          |          |          |          |          |          |          |          |          |          |          |          |          |          |          |           |           |           |           |           |           |           |           |           |           |           |           |           |           |           |           |           |           |           |           |           |           |           |           |           |           |           |           |           |           |           |           |           |           |           |           |           |           |           |

|   |          |          |          |           |           |           |
|---|----------|----------|----------|-----------|-----------|-----------|
| C | -2.6419  | 0.68773  | -0.17018 | 1471.9070 | 1479.5629 | 1483.4237 |
| C | -1.40232 | 2.63131  | 0.18243  | 1486.9651 | 1507.0740 | 1530.3455 |
| C | -2.54612 | -0.69948 | -0.473   | 1536.5976 | 1571.6367 | 1573.6291 |
| C | -3.85751 | 1.36892  | -0.34366 | 1579.0210 | 1612.8378 | 1635.3431 |
| C | -2.60856 | 3.38987  | 0.06746  | 1649.4898 | 1675.0218 | 1685.9335 |
| C | -3.68395 | -1.41093 | -0.85497 | 1697.9603 | 1703.5042 | 1714.8606 |
| C | -5.01086 | 0.62776  | -0.7304  | 1726.5522 | 1734.4623 | 3060.2666 |
| C | -3.81127 | 2.77441  | -0.14902 | 3076.4491 | 3160.8342 | 3193.4542 |
| H | -2.5437  | 4.47039  | 0.12736  | 3215.2072 | 3217.1838 | 3220.5337 |
| C | -3.49611 | -2.81096 | -1.09214 | 3220.8005 | 3222.2071 | 3226.2306 |
| C | -4.92298 | -0.71816 | -0.96905 | 3227.7587 | 3230.2241 | 3237.3596 |
| C | -1.12587 | -2.59283 | -0.5131  | 3237.9368 | 3238.6919 | 3241.8526 |
| H | -5.95565 | 1.14835  | -0.84527 | 3243.4078 | 3244.2952 | 3362.5059 |
| H | -4.72293 | 3.35904  | -0.23033 |           |           |           |
| C | -2.27313 | -3.37458 | -0.91505 |           |           |           |
| H | -4.34338 | -3.41754 | -1.39738 |           |           |           |
| H | -5.80406 | -1.27873 | -1.26545 |           |           |           |
| H | -2.12414 | -4.43741 | -1.06946 |           |           |           |
| N | -1.47916 | 1.2944   | 0.20453  |           |           |           |
| N | -1.3036  | -1.25542 | -0.37314 |           |           |           |
| O | 0.47846  | 0.54248  | 2.43817  |           |           |           |
| C | -0.21322 | -0.45978 | 2.80871  |           |           |           |
| H | -1.23358 | -0.26352 | 3.18061  |           |           |           |
| H | -0.75935 | -0.95946 | 1.51422  |           |           |           |
| C | -0.14286 | 3.34624  | 0.07117  |           |           |           |
| H | -0.24047 | 4.42181  | -0.03285 |           |           |           |
| C | 0.11448  | -3.21199 | -0.2967  |           |           |           |
| H | 0.15236  | -4.28424 | -0.4421  |           |           |           |
| H | 1.3933   | 1.44448  | 1.19576  |           |           |           |
| C | 0.45314  | -1.72237 | 3.29228  |           |           |           |
| H | 0.70225  | -1.57206 | 4.34817  |           |           |           |
| H | -0.21189 | -2.58453 | 3.21677  |           |           |           |
| H | 1.37367  | -1.90048 | 2.73481  |           |           |           |



### Statistical Thermodynamic Analysis

Temperature = 403.15 K

Pressure = 1 atm

Zero-point correction = 0.419634

Electronic Energy = -1517.57993126

Internal Energy (E) = -1517.11583326

Enthalpy (H) = -1517.11455726

Gibbs Free Energy (G) = -1517.24105826

Gibbs Free Energy of Solvation = -1517.29455297

| St. Point                   | General Structure                                                                 | Ball & Stick model                                                                 |
|-----------------------------|-----------------------------------------------------------------------------------|------------------------------------------------------------------------------------|
| <b>I3<sub>MLC</sub></b>     | 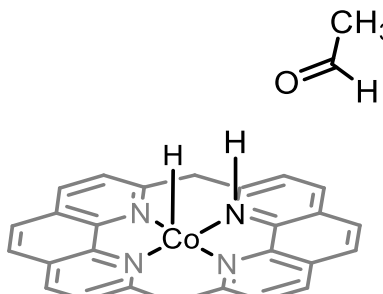 |  |
| <b>Cartesian coordinate</b> |                                                                                   | <b>Frequencies</b>                                                                 |
| -----                       |                                                                                   |                                                                                    |
| <b>Atoms</b>                | <b>X</b>                                                                          | <b>Y</b>                                                                           |
| -----                       |                                                                                   |                                                                                    |
| C                           | -2.1414                                                                           | -3.49698                                                                           |
| C                           | -3.34291                                                                          | -2.90499                                                                           |
| C                           | -3.48166                                                                          | -1.45335                                                                           |
| C                           | -2.35374                                                                          | -0.72087                                                                           |
| C                           | -0.93607                                                                          | -2.73192                                                                           |
| C                           | -4.65692                                                                          | -0.74543                                                                           |
| C                           | -2.31538                                                                          | 0.67547                                                                            |
| C                           | -3.49312                                                                          | 1.37642                                                                            |
| C                           | -4.66202                                                                          | 0.63738                                                                            |
| C                           | -3.37936                                                                          | 2.80871                                                                            |
| H                           | -4.25889                                                                          | 3.40751                                                                            |
| C                           | -2.18214                                                                          | 3.40287                                                                            |
| C                           | -0.97927                                                                          | 2.63056                                                                            |
| H                           | -5.55366                                                                          | -1.29862                                                                           |
| H                           | -2.03558                                                                          | -4.57252                                                                           |
|                             |                                                                                   | -0.6084                                                                            |
|                             |                                                                                   | -0.78537                                                                           |
|                             |                                                                                   | -0.7747                                                                            |
|                             |                                                                                   | -0.45724                                                                           |
|                             |                                                                                   | -0.32448                                                                           |
|                             |                                                                                   | -1.11739                                                                           |
|                             |                                                                                   | -0.52972                                                                           |
|                             |                                                                                   | -0.84605                                                                           |
|                             |                                                                                   | -1.12869                                                                           |
|                             |                                                                                   | -0.8663                                                                            |
|                             |                                                                                   | -1.08379                                                                           |
|                             |                                                                                   | -0.63135                                                                           |
|                             |                                                                                   | -0.38345                                                                           |
|                             |                                                                                   | -1.37653                                                                           |
|                             |                                                                                   | -0.70354                                                                           |
|                             |                                                                                   | 32.9647                                                                            |
|                             |                                                                                   | 64.3766                                                                            |
|                             |                                                                                   | 102.7363                                                                           |
|                             |                                                                                   | 149.8913                                                                           |
|                             |                                                                                   | 211.9229                                                                           |
|                             |                                                                                   | 247.0716                                                                           |
|                             |                                                                                   | 266.1930                                                                           |
|                             |                                                                                   | 327.4416                                                                           |
|                             |                                                                                   | 375.4063                                                                           |
|                             |                                                                                   | 407.7793                                                                           |
|                             |                                                                                   | 458.9729                                                                           |
|                             |                                                                                   | 484.3658                                                                           |
|                             |                                                                                   | 519.5413                                                                           |
|                             |                                                                                   | 565.8753                                                                           |
|                             |                                                                                   | 594.0656                                                                           |
|                             |                                                                                   | 659.0343                                                                           |
|                             |                                                                                   | 705.0923                                                                           |
|                             |                                                                                   | 722.7801                                                                           |
|                             |                                                                                   | 757.7636                                                                           |
|                             |                                                                                   | 780.3497                                                                           |
|                             |                                                                                   | 823.9789                                                                           |
|                             |                                                                                   | 846.6690                                                                           |
|                             |                                                                                   | 866.3129                                                                           |
|                             |                                                                                   | 885.6634                                                                           |
|                             |                                                                                   | 918.5342                                                                           |
|                             |                                                                                   | 992.7229                                                                           |
|                             |                                                                                   | 1017.9335                                                                          |
|                             |                                                                                   | 1030.3943                                                                          |
|                             |                                                                                   | 38.0711                                                                            |
|                             |                                                                                   | 74.4267                                                                            |
|                             |                                                                                   | 123.8873                                                                           |
|                             |                                                                                   | 158.0577                                                                           |
|                             |                                                                                   | 220.6222                                                                           |
|                             |                                                                                   | 248.0548                                                                           |
|                             |                                                                                   | 275.8071                                                                           |
|                             |                                                                                   | 338.0065                                                                           |
|                             |                                                                                   | 393.6290                                                                           |
|                             |                                                                                   | 447.0732                                                                           |
|                             |                                                                                   | 473.2078                                                                           |
|                             |                                                                                   | 491.8303                                                                           |
|                             |                                                                                   | 536.1897                                                                           |
|                             |                                                                                   | 584.0177                                                                           |
|                             |                                                                                   | 602.3433                                                                           |
|                             |                                                                                   | 671.2826                                                                           |
|                             |                                                                                   | 711.6131                                                                           |
|                             |                                                                                   | 734.4668                                                                           |
|                             |                                                                                   | 766.2319                                                                           |
|                             |                                                                                   | 790.1878                                                                           |
|                             |                                                                                   | 827.9661                                                                           |
|                             |                                                                                   | 852.2770                                                                           |
|                             |                                                                                   | 882.8855                                                                           |
|                             |                                                                                   | 914.2924                                                                           |
|                             |                                                                                   | 927.9476                                                                           |
|                             |                                                                                   | 993.6618                                                                           |
|                             |                                                                                   | 1023.0034                                                                          |
|                             |                                                                                   | 1033.6696                                                                          |
|                             |                                                                                   | 53.5433                                                                            |
|                             |                                                                                   | 91.6692                                                                            |
|                             |                                                                                   | 144.7224                                                                           |
|                             |                                                                                   | 189.0358                                                                           |
|                             |                                                                                   | 239.1235                                                                           |
|                             |                                                                                   | 254.2074                                                                           |
|                             |                                                                                   | 313.0521                                                                           |
|                             |                                                                                   | 344.9099                                                                           |
|                             |                                                                                   | 400.7625                                                                           |
|                             |                                                                                   | 453.8710                                                                           |
|                             |                                                                                   | 481.2571                                                                           |
|                             |                                                                                   | 503.2080                                                                           |
|                             |                                                                                   | 552.7512                                                                           |
|                             |                                                                                   | 589.8366                                                                           |
|                             |                                                                                   | 622.3925                                                                           |
|                             |                                                                                   | 686.2934                                                                           |
|                             |                                                                                   | 717.4178                                                                           |
|                             |                                                                                   | 742.4916                                                                           |
|                             |                                                                                   | 772.1669                                                                           |
|                             |                                                                                   | 811.4758                                                                           |
|                             |                                                                                   | 835.6794                                                                           |
|                             |                                                                                   | 863.9178                                                                           |
|                             |                                                                                   | 884.0798                                                                           |
|                             |                                                                                   | 916.8740                                                                           |
|                             |                                                                                   | 953.8815                                                                           |
|                             |                                                                                   | 999.6509                                                                           |
|                             |                                                                                   | 1027.1365                                                                          |
|                             |                                                                                   | 1098.2260                                                                          |

|    |          |          |          |           |           |           |
|----|----------|----------|----------|-----------|-----------|-----------|
| H  | -4.21953 | -3.50711 | -1.00282 | 1113.9755 | 1133.6420 | 1142.8712 |
| H  | -5.5709  | 1.17355  | -1.38415 | 1145.2922 | 1151.7643 | 1157.3882 |
| H  | -2.08783 | 4.48292  | -0.65561 | 1174.9498 | 1181.3287 | 1181.9173 |
| N  | -1.14769 | -1.34945 | 0.02402  | 1190.5385 | 1222.5914 | 1235.9326 |
| N  | -1.09924 | 1.28226  | -0.32066 | 1243.5348 | 1246.8086 | 1260.8894 |
| Co | 0.2849   | 0.02461  | -0.06645 | 1261.1756 | 1270.1650 | 1272.5484 |
| C  | 2.91011  | -0.68726 | -0.01843 | 1297.5789 | 1325.6935 | 1346.3990 |
| C  | 1.59763  | -2.62202 | -0.13196 | 1384.6244 | 1388.9764 | 1395.8881 |
| C  | 2.89038  | 0.73966  | -0.03908 | 1406.2237 | 1420.1269 | 1423.9564 |
| C  | 4.12515  | -1.38982 | 0.01066  | 1444.1805 | 1450.6855 | 1452.7206 |
| C  | 2.78593  | -3.40317 | -0.10389 | 1458.9532 | 1461.9640 | 1465.1875 |
| C  | 4.08564  | 1.45245  | -0.01086 | 1479.8573 | 1481.8680 | 1488.1415 |
| C  | 5.34096  | -0.64165 | 0.05     | 1490.9707 | 1514.1474 | 1533.6415 |
| C  | 4.01924  | -2.80211 | -0.02249 | 1545.2828 | 1572.0571 | 1580.9913 |
| H  | 2.70098  | -4.48285 | -0.15095 | 1626.8200 | 1641.5877 | 1653.8678 |
| C  | 3.95769  | 2.87947  | -0.04301 | 1679.5725 | 1693.2524 | 1698.9328 |
| C  | 5.31522  | 0.72719  | 0.04219  | 1708.2781 | 1718.6062 | 1732.1315 |
| C  | 1.5189   | 2.66342  | -0.15051 | 1859.9628 | 2185.6777 | 3048.6305 |
| H  | 6.285    | -1.1753  | 0.07972  | 3071.3563 | 3148.8491 | 3177.7594 |
| H  | 4.92046  | -3.40771 | 0.002    | 3189.9812 | 3214.5629 | 3214.9068 |
| C  | 2.72706  | 3.45541  | -0.1077  | 3219.7045 | 3221.9602 | 3226.2241 |
| H  | 4.85157  | 3.49535  | -0.01748 | 3228.1798 | 3229.1642 | 3231.7986 |
| H  | 6.24462  | 1.28765  | 0.06941  | 3234.5550 | 3238.8388 | 3239.4179 |
| H  | 2.62357  | 4.53453  | -0.13349 | 3240.8308 | 3242.9746 | 3246.0857 |
| N  | 1.69678  | -1.29304 | -0.06469 |           |           |           |
| N  | 1.65881  | 1.31745  | -0.1132  |           |           |           |
| O  | -1.67201 | -0.54467 | 2.67308  |           |           |           |
| C  | -2.51501 | 0.18392  | 3.15659  |           |           |           |
| H  | -2.29123 | 0.70373  | 4.10607  |           |           |           |
| H  | 0.32332  | 0.1249   | 1.3039   |           |           |           |
| C  | 0.30303  | -3.28006 | -0.29396 |           |           |           |
| H  | 0.35528  | -4.35348 | -0.44745 |           |           |           |
| C  | 0.25785  | 3.27854  | -0.25568 |           |           |           |

|   |          |          |          |
|---|----------|----------|----------|
| H | 0.24863  | 4.36049  | -0.30189 |
| H | -1.2588  | -1.31678 | 1.05961  |
| C | -3.85832 | 0.45249  | 2.55654  |
| H | -4.63401 | 0.32291  | 3.31691  |
| H | -3.89517 | 1.50221  | 2.24073  |
| H | -4.0495  | -0.19501 | 1.69899  |

### Statistical Thermodynamic Analysis

Temperature = 403.15 K

Pressure = 1 atm

Zero-point correction = 0.421361

Electronic Energy = -1517.64147783

Internal Energy (E) = -1517.17445983

Enthalpy (H) = -1517.17318283

Gibbs Free Energy (G) = -1517.30439283

Gibbs Free Energy of Solvation = -1517.35936556

| St. Point                                  | General Structure                                                                  | Ball & Stick model                                                                  |          |           |           |           |
|--------------------------------------------|------------------------------------------------------------------------------------|-------------------------------------------------------------------------------------|----------|-----------|-----------|-----------|
| <b>Azobenzene</b><br>(Cs+-<br>coordinated) | 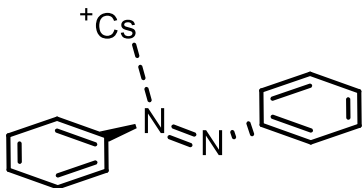 |  |          |           |           |           |
| <b>Cartesian coordinate</b>                |                                                                                    | <b>Frequencies</b>                                                                  |          |           |           |           |
| -----                                      |                                                                                    |                                                                                     |          |           |           |           |
| <b>Atoms</b>                               | <b>X</b>                                                                           | <b>Y</b>                                                                            | <b>Z</b> | 20.3361   | 26.0580   | 44.2393   |
|                                            |                                                                                    |                                                                                     |          | 67.4118   | 84.2364   | 100.9353  |
|                                            |                                                                                    |                                                                                     |          | 138.0764  | 211.7141  | 275.5489  |
|                                            |                                                                                    |                                                                                     |          | 304.0300  | 348.8699  | 418.0200  |
|                                            |                                                                                    |                                                                                     |          | 426.2119  | 481.8267  | 537.8891  |
|                                            |                                                                                    |                                                                                     |          | 546.1306  | 570.2543  | 622.5548  |
|                                            |                                                                                    |                                                                                     |          | 628.3696  | 679.7735  | 704.5196  |
|                                            |                                                                                    |                                                                                     |          | 719.3472  | 791.7370  | 807.7348  |
|                                            |                                                                                    |                                                                                     |          | 845.6634  | 876.1587  | 883.7976  |
|                                            |                                                                                    |                                                                                     |          | 944.9427  | 968.9584  | 971.1331  |
|                                            |                                                                                    |                                                                                     |          | 1015.7359 | 1016.7883 | 1018.6400 |
|                                            |                                                                                    |                                                                                     |          | 1020.5555 | 1039.0971 | 1043.0367 |
|                                            |                                                                                    |                                                                                     |          | 1060.5521 | 1061.2220 | 1112.8193 |
|                                            |                                                                                    |                                                                                     |          | 1118.6075 | 1183.7213 | 1187.5108 |
|                                            |                                                                                    |                                                                                     |          | 1189.3245 | 1190.6384 | 1233.1986 |
|                                            |                                                                                    |                                                                                     |          | 1283.9727 | 1337.3521 | 1346.7028 |
|                                            |                                                                                    |                                                                                     |          | 1364.5180 | 1377.2852 | 1505.1091 |
|                                            |                                                                                    |                                                                                     |          | 1512.9817 | 1533.2716 | 1543.8296 |
|                                            |                                                                                    |                                                                                     |          | 1636.6340 | 1673.4380 | 1684.6879 |
|                                            |                                                                                    |                                                                                     |          | 1691.6255 | 1701.0727 | 3211.2236 |

|    |          |          |          |           |           |           |
|----|----------|----------|----------|-----------|-----------|-----------|
| C  | 2.97003  | 1.36227  | 1.45493  | 3215.6732 | 3219.1797 | 3224.5687 |
| H  | 0.92854  | 1.09680  | 2.12790  | 3226.6006 | 3234.5784 | 3235.9959 |
| C  | 3.23170  | 1.99738  | -0.86467 | 3242.5091 | 3246.0618 | 3264.7983 |
| H  | 1.38538  | 2.24928  | -1.97212 |           |           |           |
| C  | 3.79323  | 1.68392  | 0.37297  |           |           |           |
| H  | 3.40717  | 1.16948  | 2.42960  |           |           |           |
| H  | 3.86928  | 2.27642  | -1.69672 |           |           |           |
| H  | 4.86928  | 1.72260  | 0.50506  |           |           |           |
| Cs | 1.13863  | -1.78685 | -0.24190 |           |           |           |
| C  | -2.47342 | 3.43093  | -0.00949 |           |           |           |
| C  | -3.82339 | -1.41770 | -0.02924 |           |           |           |
| C  | -5.04390 | 0.68674  | -0.04268 |           |           |           |
| C  | -3.70087 | 2.84513  | -0.02388 |           |           |           |
| H  | -2.37687 | 4.51148  | -0.00260 |           |           |           |
| C  | -3.70086 | -2.84511 | -0.02396 |           |           |           |
| C  | -5.04390 | -0.68672 | -0.04268 |           |           |           |
| C  | -1.25756 | -2.64674 | 0.00047  |           |           |           |
| H  | -5.98116 | 1.23509  | -0.05313 |           |           |           |
| H  | -4.60015 | 3.45511  | -0.02958 |           |           |           |
| C  | -2.47341 | -3.43094 | -0.00962 |           |           |           |
| H  | -4.60014 | -3.45510 | -0.02964 |           |           |           |
| H  | -5.98117 | -1.23506 | -0.05312 |           |           |           |
| H  | -2.37687 | -4.51149 | -0.00276 |           |           |           |
| N  | -1.38780 | 1.30028  | -0.01186 |           |           |           |
| N  | -1.38782 | -1.30028 | -0.01191 |           |           |           |
| H  | 0.00022  | -0.00008 | 1.45530  |           |           |           |
| C  | -0.00001 | 3.27742  | 0.01504  |           |           |           |
| H  | -0.00000 | 4.36099  | 0.02340  |           |           |           |
| C  | -0.00000 | -3.27741 | 0.01489  |           |           |           |
| H  | 0.00001  | -4.36099 | 0.02318  |           |           |           |

### Statistical Thermodynamic Analysis

Temperature = 403.15 K

Pressure = 1 atm

Zero-point correction = 0.193762

Electronic Energy = -592.21227481

Internal Energy (E) = -591.996024481

Enthalpy (H) = -591.994747481

Gibbs Free Energy (G) = -592.085083481

Gibbs Free Energy of Solvation = -592.168642489

| St. Point                | General Structure | Ball & Stick model |
|--------------------------|-------------------|--------------------|
| 12 <sup>Hyd(spill)</sup> |                   |                    |

| Cartesian coordinate |          |          |          | Frequencies |           |           |
|----------------------|----------|----------|----------|-------------|-----------|-----------|
| Atoms                | X        | Y        | Z        |             |           |           |
|                      |          |          |          | 16.1886     | 19.5992   | 30.9713   |
|                      |          |          |          | 41.6992     | 48.6996   | 53.5664   |
|                      |          |          |          | 61.0114     | 63.6412   | 78.9196   |
|                      |          |          |          | 81.0216     | 86.4280   | 92.4177   |
|                      |          |          |          | 99.1701     | 99.7323   | 123.9895  |
| N                    | -0.36540 | 1.54303  | -0.20810 | 139.4520    | 156.9871  | 162.6380  |
| N                    | -0.94090 | 0.62812  | 0.41698  | 180.0154    | 201.3417  | 228.7421  |
| C                    | -2.34640 | 0.54230  | 0.21341  | 242.9894    | 251.1213  | 257.8106  |
| C                    | -3.06482 | 1.38661  | -0.64205 | 261.6035    | 265.2048  | 282.7451  |
| C                    | -2.99530 | -0.46633 | 0.92784  | 283.3273    | 302.3088  | 302.9966  |
| C                    | -4.43204 | 1.20114  | -0.77872 | 339.6396    | 342.2815  | 350.2256  |
| H                    | -2.54390 | 2.17073  | -1.17886 | 380.1152    | 384.6101  | 405.4388  |
| C                    | -4.36764 | -0.64278 | 0.78822  | 409.1494    | 411.0294  | 412.1062  |
| H                    | -2.41579 | -1.08523 | 1.60713  | 426.5366    | 448.8458  | 458.8658  |
| C                    | -5.08375 | 0.18956  | -0.06765 | 463.3402    | 463.7381  | 477.3346  |
| H                    | -5.00017 | 1.84900  | -1.43752 | 484.8039    | 485.7680  | 493.8750  |
| H                    | -4.87690 | -1.41985 | 1.34743  | 496.4880    | 536.1127  | 537.9858  |
| H                    | -6.15469 | 0.05672  | -0.17966 | 550.5720    | 558.5225  | 571.5014  |
| C                    | 1.03275  | 1.60972  | 0.04286  | 584.8184    | 587.1317  | 595.5571  |
| C                    | 1.58869  | 1.31970  | 1.29532  | 598.5088    | 600.5177  | 622.8991  |
| C                    | 1.84875  | 1.98202  | -1.02740 | 627.9863    | 628.2926  | 677.7712  |
| C                    | 2.97003  | 1.36227  | 1.45493  | 679.5634    | 688.4206  | 689.6013  |
| H                    | 0.92854  | 1.09680  | 2.12790  | 693.6914    | 698.3051  | 711.9259  |
| C                    | 3.23170  | 1.99738  | -0.86467 | 715.3481    | 719.5109  | 720.8185  |
| H                    | 1.38538  | 2.24928  | -1.97212 | 743.7384    | 747.6604  | 751.7160  |
| C                    | 3.79323  | 1.68392  | 0.37297  | 763.4314    | 768.2910  | 772.0732  |
| H                    | 3.40717  | 1.16948  | 2.42960  | 784.4668    | 786.3290  | 796.1572  |
| H                    | 3.86928  | 2.27642  | -1.69672 | 820.6387    | 823.0694  | 829.4558  |
| H                    | 4.86928  | 1.72260  | 0.50506  | 833.2895    | 843.3488  | 850.6712  |
| Cs                   | 1.13863  | -1.78685 | -0.24190 | 858.7031    | 862.1430  | 868.2969  |
| C                    | -2.47342 | 3.43093  | -0.00949 | 869.7120    | 876.1387  | 882.0651  |
| C                    | -3.82339 | -1.41770 | -0.02924 | 883.8364    | 907.7568  | 920.1849  |
| C                    | -5.04390 | 0.68674  | -0.04268 | 935.6151    | 942.7283  | 945.5219  |
| C                    | -3.70087 | 2.84513  | -0.02388 | 951.7396    | 970.2310  | 981.2232  |
| H                    | -2.37687 | 4.51148  | -0.00260 | 987.2637    | 988.4210  | 1009.2898 |
| C                    | -3.70086 | -2.84511 | -0.02396 | 1012.5681   | 1017.1480 | 1017.6477 |
| C                    | -5.04390 | -0.68672 | -0.04268 | 1019.4744   | 1020.7415 | 1021.3596 |
| C                    | -1.25756 | -2.64674 | 0.00047  | 1021.9830   | 1025.5861 | 1030.0482 |
| H                    | -5.98116 | 1.23509  | -0.05313 | 1043.9416   | 1059.8190 | 1061.3269 |
| H                    | -4.60015 | 3.45511  | -0.02958 | 1108.5472   | 1115.2966 | 1119.1106 |
| C                    | -2.47341 | -3.43094 | -0.00962 | 1135.5000   | 1142.0201 | 1159.7775 |
| H                    | -4.60014 | -3.45510 | -0.02964 | 1168.8236   | 1173.2430 | 1178.8091 |
| H                    | -5.98117 | -1.23506 | -0.05312 | 1182.4539   | 1183.1288 | 1185.6766 |
| H                    | -2.37687 | -4.51149 | -0.00276 | 1186.7548   | 1187.0126 | 1231.2380 |
| N                    | -1.38780 | 1.30028  | -0.01186 | 1232.0332   | 1241.8836 | 1243.4103 |
| N                    | -1.38782 | -1.30028 | -0.01191 | 1246.6784   | 1255.1657 | 1257.8797 |
| H                    | 0.00022  | -0.00008 | 1.45530  | 1274.5009   | 1280.7894 | 1298.1675 |
| C                    | -0.00001 | 3.27742  | 0.01504  | 1302.3568   | 1329.3783 | 1331.6490 |
| H                    | -0.00000 | 4.36099  | 0.02340  | 1340.8717   | 1361.7096 | 1374.6574 |
| C                    | -0.00000 | -3.27741 | 0.01489  | 1383.1205   | 1394.8484 | 1416.8378 |
| H                    | 0.00001  | -4.36099 | 0.02318  | 1421.2954   | 1431.7755 | 1450.6874 |
|                      |          |          |          | 1457.4196   | 1465.9054 | 1469.6592 |
|                      |          |          |          | 1476.5117   | 1478.6585 | 1483.9665 |

|  |           |           |           |
|--|-----------|-----------|-----------|
|  | 1486.5821 | 1500.9334 | 1509.4216 |
|  | 1516.7356 | 1532.5834 | 1533.2911 |
|  | 1542.0748 | 1565.6504 | 1569.5503 |
|  | 1573.3629 | 1625.3069 | 1635.3830 |
|  | 1648.6960 | 1657.5747 | 1671.1077 |
|  | 1680.3908 | 1686.3188 | 1691.8888 |
|  | 1698.9287 | 1702.3399 | 1704.2117 |
|  | 1709.7051 | 1719.2949 | 2141.0449 |
|  | 3200.4055 | 3204.3389 | 3206.2260 |
|  | 3206.8383 | 3208.2652 | 3210.7272 |
|  | 3213.7408 | 3214.8775 | 3215.2496 |
|  | 3219.1976 | 3219.7978 | 3220.5367 |
|  | 3225.9534 | 3228.9732 | 3229.4317 |
|  | 3232.9518 | 3233.2965 | 3233.5489 |
|  | 3234.3753 | 3235.2840 | 3236.1287 |
|  | 3237.6567 | 3237.7069 | 3258.0009 |

### Statistical Thermodynamic Analysis

Temperature = 403.15 K

Pressure = 1 atm

Zero-point correction = 0.544432

Electronic Energy = -1955.76051398

Internal Energy (E) = -1955.15388998

Enthalpy (H) = -1955.15261398

Gibbs Free Energy (G) = -1955.32276798

Gibbs Free Energy of Solvation = -1955.390835

| St. Point                                                                                                                                                                                                                                                                                                                                                                                                                                                                                                                                                                                                                                                                                                                                                                                                  | General Structure | Ball & Stick model |          |   |   |   |          |         |          |   |          |         |         |   |          |         |         |   |          |         |          |   |          |          |         |   |          |         |          |   |          |         |          |   |          |          |         |   |          |          |         |                                                                                                                                                                                                                                                                                                                                                                                                                                                                                                                                                                                                                                                                                                                                                                                                                                                                                  |            |         |         |         |         |         |         |         |         |         |         |         |         |          |          |          |          |          |          |          |          |          |          |          |          |          |          |          |          |          |          |          |          |          |          |          |          |          |          |
|------------------------------------------------------------------------------------------------------------------------------------------------------------------------------------------------------------------------------------------------------------------------------------------------------------------------------------------------------------------------------------------------------------------------------------------------------------------------------------------------------------------------------------------------------------------------------------------------------------------------------------------------------------------------------------------------------------------------------------------------------------------------------------------------------------|-------------------|--------------------|----------|---|---|---|----------|---------|----------|---|----------|---------|---------|---|----------|---------|---------|---|----------|---------|----------|---|----------|----------|---------|---|----------|---------|----------|---|----------|---------|----------|---|----------|----------|---------|---|----------|----------|---------|----------------------------------------------------------------------------------------------------------------------------------------------------------------------------------------------------------------------------------------------------------------------------------------------------------------------------------------------------------------------------------------------------------------------------------------------------------------------------------------------------------------------------------------------------------------------------------------------------------------------------------------------------------------------------------------------------------------------------------------------------------------------------------------------------------------------------------------------------------------------------------|------------|---------|---------|---------|---------|---------|---------|---------|---------|---------|---------|---------|---------|----------|----------|----------|----------|----------|----------|----------|----------|----------|----------|----------|----------|----------|----------|----------|----------|----------|----------|----------|----------|----------|----------|----------|----------|----------|----------|
| TS1 <sup>Hyd(spill)</sup>                                                                                                                                                                                                                                                                                                                                                                                                                                                                                                                                                                                                                                                                                                                                                                                  |                   |                    |          |   |   |   |          |         |          |   |          |         |         |   |          |         |         |   |          |         |          |   |          |          |         |   |          |         |          |   |          |         |          |   |          |          |         |   |          |          |         |                                                                                                                                                                                                                                                                                                                                                                                                                                                                                                                                                                                                                                                                                                                                                                                                                                                                                  |            |         |         |         |         |         |         |         |         |         |         |         |         |          |          |          |          |          |          |          |          |          |          |          |          |          |          |          |          |          |          |          |          |          |          |          |          |          |          |
| <h3>Cartesian coordinate</h3> <table border="1"> <thead> <tr> <th>Atoms</th> <th>X</th> <th>Y</th> <th>Z</th> </tr> </thead> <tbody> <tr><td>N</td><td>-0.36540</td><td>1.54303</td><td>-0.20810</td></tr> <tr><td>N</td><td>-0.94090</td><td>0.62812</td><td>0.41698</td></tr> <tr><td>C</td><td>-2.34640</td><td>0.54230</td><td>0.21341</td></tr> <tr><td>C</td><td>-3.06482</td><td>1.38661</td><td>-0.64205</td></tr> <tr><td>C</td><td>-2.99530</td><td>-0.46633</td><td>0.92784</td></tr> <tr><td>C</td><td>-4.43204</td><td>1.20114</td><td>-0.77872</td></tr> <tr><td>H</td><td>-2.54390</td><td>2.17073</td><td>-1.17886</td></tr> <tr><td>C</td><td>-4.36764</td><td>-0.64278</td><td>0.78822</td></tr> <tr><td>H</td><td>-2.41579</td><td>-1.08523</td><td>1.60713</td></tr> </tbody> </table> |                   | Atoms              | X        | Y | Z | N | -0.36540 | 1.54303 | -0.20810 | N | -0.94090 | 0.62812 | 0.41698 | C | -2.34640 | 0.54230 | 0.21341 | C | -3.06482 | 1.38661 | -0.64205 | C | -2.99530 | -0.46633 | 0.92784 | C | -4.43204 | 1.20114 | -0.77872 | H | -2.54390 | 2.17073 | -1.17886 | C | -4.36764 | -0.64278 | 0.78822 | H | -2.41579 | -1.08523 | 1.60713 | <h3>Frequencies</h3> <table border="1"> <tbody> <tr><td>-1211.7879</td><td>19.3397</td><td>24.6616</td></tr> <tr><td>34.6775</td><td>41.6588</td><td>47.6085</td></tr> <tr><td>53.5586</td><td>58.2169</td><td>72.9999</td></tr> <tr><td>81.9955</td><td>85.6695</td><td>88.5574</td></tr> <tr><td>98.3436</td><td>104.6805</td><td>108.9823</td></tr> <tr><td>127.7003</td><td>141.3948</td><td>161.0756</td></tr> <tr><td>163.0545</td><td>180.7915</td><td>202.4008</td></tr> <tr><td>230.9652</td><td>238.5698</td><td>242.8680</td></tr> <tr><td>250.6699</td><td>262.0975</td><td>265.5529</td></tr> <tr><td>282.0188</td><td>284.1693</td><td>299.4834</td></tr> <tr><td>302.0018</td><td>340.5283</td><td>346.1235</td></tr> <tr><td>355.1161</td><td>379.3844</td><td>381.8970</td></tr> <tr><td>405.4311</td><td>407.9228</td><td>410.4750</td></tr> </tbody> </table> | -1211.7879 | 19.3397 | 24.6616 | 34.6775 | 41.6588 | 47.6085 | 53.5586 | 58.2169 | 72.9999 | 81.9955 | 85.6695 | 88.5574 | 98.3436 | 104.6805 | 108.9823 | 127.7003 | 141.3948 | 161.0756 | 163.0545 | 180.7915 | 202.4008 | 230.9652 | 238.5698 | 242.8680 | 250.6699 | 262.0975 | 265.5529 | 282.0188 | 284.1693 | 299.4834 | 302.0018 | 340.5283 | 346.1235 | 355.1161 | 379.3844 | 381.8970 | 405.4311 | 407.9228 | 410.4750 |
| Atoms                                                                                                                                                                                                                                                                                                                                                                                                                                                                                                                                                                                                                                                                                                                                                                                                      | X                 | Y                  | Z        |   |   |   |          |         |          |   |          |         |         |   |          |         |         |   |          |         |          |   |          |          |         |   |          |         |          |   |          |         |          |   |          |          |         |   |          |          |         |                                                                                                                                                                                                                                                                                                                                                                                                                                                                                                                                                                                                                                                                                                                                                                                                                                                                                  |            |         |         |         |         |         |         |         |         |         |         |         |         |          |          |          |          |          |          |          |          |          |          |          |          |          |          |          |          |          |          |          |          |          |          |          |          |          |          |
| N                                                                                                                                                                                                                                                                                                                                                                                                                                                                                                                                                                                                                                                                                                                                                                                                          | -0.36540          | 1.54303            | -0.20810 |   |   |   |          |         |          |   |          |         |         |   |          |         |         |   |          |         |          |   |          |          |         |   |          |         |          |   |          |         |          |   |          |          |         |   |          |          |         |                                                                                                                                                                                                                                                                                                                                                                                                                                                                                                                                                                                                                                                                                                                                                                                                                                                                                  |            |         |         |         |         |         |         |         |         |         |         |         |         |          |          |          |          |          |          |          |          |          |          |          |          |          |          |          |          |          |          |          |          |          |          |          |          |          |          |
| N                                                                                                                                                                                                                                                                                                                                                                                                                                                                                                                                                                                                                                                                                                                                                                                                          | -0.94090          | 0.62812            | 0.41698  |   |   |   |          |         |          |   |          |         |         |   |          |         |         |   |          |         |          |   |          |          |         |   |          |         |          |   |          |         |          |   |          |          |         |   |          |          |         |                                                                                                                                                                                                                                                                                                                                                                                                                                                                                                                                                                                                                                                                                                                                                                                                                                                                                  |            |         |         |         |         |         |         |         |         |         |         |         |         |          |          |          |          |          |          |          |          |          |          |          |          |          |          |          |          |          |          |          |          |          |          |          |          |          |          |
| C                                                                                                                                                                                                                                                                                                                                                                                                                                                                                                                                                                                                                                                                                                                                                                                                          | -2.34640          | 0.54230            | 0.21341  |   |   |   |          |         |          |   |          |         |         |   |          |         |         |   |          |         |          |   |          |          |         |   |          |         |          |   |          |         |          |   |          |          |         |   |          |          |         |                                                                                                                                                                                                                                                                                                                                                                                                                                                                                                                                                                                                                                                                                                                                                                                                                                                                                  |            |         |         |         |         |         |         |         |         |         |         |         |         |          |          |          |          |          |          |          |          |          |          |          |          |          |          |          |          |          |          |          |          |          |          |          |          |          |          |
| C                                                                                                                                                                                                                                                                                                                                                                                                                                                                                                                                                                                                                                                                                                                                                                                                          | -3.06482          | 1.38661            | -0.64205 |   |   |   |          |         |          |   |          |         |         |   |          |         |         |   |          |         |          |   |          |          |         |   |          |         |          |   |          |         |          |   |          |          |         |   |          |          |         |                                                                                                                                                                                                                                                                                                                                                                                                                                                                                                                                                                                                                                                                                                                                                                                                                                                                                  |            |         |         |         |         |         |         |         |         |         |         |         |         |          |          |          |          |          |          |          |          |          |          |          |          |          |          |          |          |          |          |          |          |          |          |          |          |          |          |
| C                                                                                                                                                                                                                                                                                                                                                                                                                                                                                                                                                                                                                                                                                                                                                                                                          | -2.99530          | -0.46633           | 0.92784  |   |   |   |          |         |          |   |          |         |         |   |          |         |         |   |          |         |          |   |          |          |         |   |          |         |          |   |          |         |          |   |          |          |         |   |          |          |         |                                                                                                                                                                                                                                                                                                                                                                                                                                                                                                                                                                                                                                                                                                                                                                                                                                                                                  |            |         |         |         |         |         |         |         |         |         |         |         |         |          |          |          |          |          |          |          |          |          |          |          |          |          |          |          |          |          |          |          |          |          |          |          |          |          |          |
| C                                                                                                                                                                                                                                                                                                                                                                                                                                                                                                                                                                                                                                                                                                                                                                                                          | -4.43204          | 1.20114            | -0.77872 |   |   |   |          |         |          |   |          |         |         |   |          |         |         |   |          |         |          |   |          |          |         |   |          |         |          |   |          |         |          |   |          |          |         |   |          |          |         |                                                                                                                                                                                                                                                                                                                                                                                                                                                                                                                                                                                                                                                                                                                                                                                                                                                                                  |            |         |         |         |         |         |         |         |         |         |         |         |         |          |          |          |          |          |          |          |          |          |          |          |          |          |          |          |          |          |          |          |          |          |          |          |          |          |          |
| H                                                                                                                                                                                                                                                                                                                                                                                                                                                                                                                                                                                                                                                                                                                                                                                                          | -2.54390          | 2.17073            | -1.17886 |   |   |   |          |         |          |   |          |         |         |   |          |         |         |   |          |         |          |   |          |          |         |   |          |         |          |   |          |         |          |   |          |          |         |   |          |          |         |                                                                                                                                                                                                                                                                                                                                                                                                                                                                                                                                                                                                                                                                                                                                                                                                                                                                                  |            |         |         |         |         |         |         |         |         |         |         |         |         |          |          |          |          |          |          |          |          |          |          |          |          |          |          |          |          |          |          |          |          |          |          |          |          |          |          |
| C                                                                                                                                                                                                                                                                                                                                                                                                                                                                                                                                                                                                                                                                                                                                                                                                          | -4.36764          | -0.64278           | 0.78822  |   |   |   |          |         |          |   |          |         |         |   |          |         |         |   |          |         |          |   |          |          |         |   |          |         |          |   |          |         |          |   |          |          |         |   |          |          |         |                                                                                                                                                                                                                                                                                                                                                                                                                                                                                                                                                                                                                                                                                                                                                                                                                                                                                  |            |         |         |         |         |         |         |         |         |         |         |         |         |          |          |          |          |          |          |          |          |          |          |          |          |          |          |          |          |          |          |          |          |          |          |          |          |          |          |
| H                                                                                                                                                                                                                                                                                                                                                                                                                                                                                                                                                                                                                                                                                                                                                                                                          | -2.41579          | -1.08523           | 1.60713  |   |   |   |          |         |          |   |          |         |         |   |          |         |         |   |          |         |          |   |          |          |         |   |          |         |          |   |          |         |          |   |          |          |         |   |          |          |         |                                                                                                                                                                                                                                                                                                                                                                                                                                                                                                                                                                                                                                                                                                                                                                                                                                                                                  |            |         |         |         |         |         |         |         |         |         |         |         |         |          |          |          |          |          |          |          |          |          |          |          |          |          |          |          |          |          |          |          |          |          |          |          |          |          |          |
| -1211.7879                                                                                                                                                                                                                                                                                                                                                                                                                                                                                                                                                                                                                                                                                                                                                                                                 | 19.3397           | 24.6616            |          |   |   |   |          |         |          |   |          |         |         |   |          |         |         |   |          |         |          |   |          |          |         |   |          |         |          |   |          |         |          |   |          |          |         |   |          |          |         |                                                                                                                                                                                                                                                                                                                                                                                                                                                                                                                                                                                                                                                                                                                                                                                                                                                                                  |            |         |         |         |         |         |         |         |         |         |         |         |         |          |          |          |          |          |          |          |          |          |          |          |          |          |          |          |          |          |          |          |          |          |          |          |          |          |          |
| 34.6775                                                                                                                                                                                                                                                                                                                                                                                                                                                                                                                                                                                                                                                                                                                                                                                                    | 41.6588           | 47.6085            |          |   |   |   |          |         |          |   |          |         |         |   |          |         |         |   |          |         |          |   |          |          |         |   |          |         |          |   |          |         |          |   |          |          |         |   |          |          |         |                                                                                                                                                                                                                                                                                                                                                                                                                                                                                                                                                                                                                                                                                                                                                                                                                                                                                  |            |         |         |         |         |         |         |         |         |         |         |         |         |          |          |          |          |          |          |          |          |          |          |          |          |          |          |          |          |          |          |          |          |          |          |          |          |          |          |
| 53.5586                                                                                                                                                                                                                                                                                                                                                                                                                                                                                                                                                                                                                                                                                                                                                                                                    | 58.2169           | 72.9999            |          |   |   |   |          |         |          |   |          |         |         |   |          |         |         |   |          |         |          |   |          |          |         |   |          |         |          |   |          |         |          |   |          |          |         |   |          |          |         |                                                                                                                                                                                                                                                                                                                                                                                                                                                                                                                                                                                                                                                                                                                                                                                                                                                                                  |            |         |         |         |         |         |         |         |         |         |         |         |         |          |          |          |          |          |          |          |          |          |          |          |          |          |          |          |          |          |          |          |          |          |          |          |          |          |          |
| 81.9955                                                                                                                                                                                                                                                                                                                                                                                                                                                                                                                                                                                                                                                                                                                                                                                                    | 85.6695           | 88.5574            |          |   |   |   |          |         |          |   |          |         |         |   |          |         |         |   |          |         |          |   |          |          |         |   |          |         |          |   |          |         |          |   |          |          |         |   |          |          |         |                                                                                                                                                                                                                                                                                                                                                                                                                                                                                                                                                                                                                                                                                                                                                                                                                                                                                  |            |         |         |         |         |         |         |         |         |         |         |         |         |          |          |          |          |          |          |          |          |          |          |          |          |          |          |          |          |          |          |          |          |          |          |          |          |          |          |
| 98.3436                                                                                                                                                                                                                                                                                                                                                                                                                                                                                                                                                                                                                                                                                                                                                                                                    | 104.6805          | 108.9823           |          |   |   |   |          |         |          |   |          |         |         |   |          |         |         |   |          |         |          |   |          |          |         |   |          |         |          |   |          |         |          |   |          |          |         |   |          |          |         |                                                                                                                                                                                                                                                                                                                                                                                                                                                                                                                                                                                                                                                                                                                                                                                                                                                                                  |            |         |         |         |         |         |         |         |         |         |         |         |         |          |          |          |          |          |          |          |          |          |          |          |          |          |          |          |          |          |          |          |          |          |          |          |          |          |          |
| 127.7003                                                                                                                                                                                                                                                                                                                                                                                                                                                                                                                                                                                                                                                                                                                                                                                                   | 141.3948          | 161.0756           |          |   |   |   |          |         |          |   |          |         |         |   |          |         |         |   |          |         |          |   |          |          |         |   |          |         |          |   |          |         |          |   |          |          |         |   |          |          |         |                                                                                                                                                                                                                                                                                                                                                                                                                                                                                                                                                                                                                                                                                                                                                                                                                                                                                  |            |         |         |         |         |         |         |         |         |         |         |         |         |          |          |          |          |          |          |          |          |          |          |          |          |          |          |          |          |          |          |          |          |          |          |          |          |          |          |
| 163.0545                                                                                                                                                                                                                                                                                                                                                                                                                                                                                                                                                                                                                                                                                                                                                                                                   | 180.7915          | 202.4008           |          |   |   |   |          |         |          |   |          |         |         |   |          |         |         |   |          |         |          |   |          |          |         |   |          |         |          |   |          |         |          |   |          |          |         |   |          |          |         |                                                                                                                                                                                                                                                                                                                                                                                                                                                                                                                                                                                                                                                                                                                                                                                                                                                                                  |            |         |         |         |         |         |         |         |         |         |         |         |         |          |          |          |          |          |          |          |          |          |          |          |          |          |          |          |          |          |          |          |          |          |          |          |          |          |          |
| 230.9652                                                                                                                                                                                                                                                                                                                                                                                                                                                                                                                                                                                                                                                                                                                                                                                                   | 238.5698          | 242.8680           |          |   |   |   |          |         |          |   |          |         |         |   |          |         |         |   |          |         |          |   |          |          |         |   |          |         |          |   |          |         |          |   |          |          |         |   |          |          |         |                                                                                                                                                                                                                                                                                                                                                                                                                                                                                                                                                                                                                                                                                                                                                                                                                                                                                  |            |         |         |         |         |         |         |         |         |         |         |         |         |          |          |          |          |          |          |          |          |          |          |          |          |          |          |          |          |          |          |          |          |          |          |          |          |          |          |
| 250.6699                                                                                                                                                                                                                                                                                                                                                                                                                                                                                                                                                                                                                                                                                                                                                                                                   | 262.0975          | 265.5529           |          |   |   |   |          |         |          |   |          |         |         |   |          |         |         |   |          |         |          |   |          |          |         |   |          |         |          |   |          |         |          |   |          |          |         |   |          |          |         |                                                                                                                                                                                                                                                                                                                                                                                                                                                                                                                                                                                                                                                                                                                                                                                                                                                                                  |            |         |         |         |         |         |         |         |         |         |         |         |         |          |          |          |          |          |          |          |          |          |          |          |          |          |          |          |          |          |          |          |          |          |          |          |          |          |          |
| 282.0188                                                                                                                                                                                                                                                                                                                                                                                                                                                                                                                                                                                                                                                                                                                                                                                                   | 284.1693          | 299.4834           |          |   |   |   |          |         |          |   |          |         |         |   |          |         |         |   |          |         |          |   |          |          |         |   |          |         |          |   |          |         |          |   |          |          |         |   |          |          |         |                                                                                                                                                                                                                                                                                                                                                                                                                                                                                                                                                                                                                                                                                                                                                                                                                                                                                  |            |         |         |         |         |         |         |         |         |         |         |         |         |          |          |          |          |          |          |          |          |          |          |          |          |          |          |          |          |          |          |          |          |          |          |          |          |          |          |
| 302.0018                                                                                                                                                                                                                                                                                                                                                                                                                                                                                                                                                                                                                                                                                                                                                                                                   | 340.5283          | 346.1235           |          |   |   |   |          |         |          |   |          |         |         |   |          |         |         |   |          |         |          |   |          |          |         |   |          |         |          |   |          |         |          |   |          |          |         |   |          |          |         |                                                                                                                                                                                                                                                                                                                                                                                                                                                                                                                                                                                                                                                                                                                                                                                                                                                                                  |            |         |         |         |         |         |         |         |         |         |         |         |         |          |          |          |          |          |          |          |          |          |          |          |          |          |          |          |          |          |          |          |          |          |          |          |          |          |          |
| 355.1161                                                                                                                                                                                                                                                                                                                                                                                                                                                                                                                                                                                                                                                                                                                                                                                                   | 379.3844          | 381.8970           |          |   |   |   |          |         |          |   |          |         |         |   |          |         |         |   |          |         |          |   |          |          |         |   |          |         |          |   |          |         |          |   |          |          |         |   |          |          |         |                                                                                                                                                                                                                                                                                                                                                                                                                                                                                                                                                                                                                                                                                                                                                                                                                                                                                  |            |         |         |         |         |         |         |         |         |         |         |         |         |          |          |          |          |          |          |          |          |          |          |          |          |          |          |          |          |          |          |          |          |          |          |          |          |          |          |
| 405.4311                                                                                                                                                                                                                                                                                                                                                                                                                                                                                                                                                                                                                                                                                                                                                                                                   | 407.9228          | 410.4750           |          |   |   |   |          |         |          |   |          |         |         |   |          |         |         |   |          |         |          |   |          |          |         |   |          |         |          |   |          |         |          |   |          |          |         |   |          |          |         |                                                                                                                                                                                                                                                                                                                                                                                                                                                                                                                                                                                                                                                                                                                                                                                                                                                                                  |            |         |         |         |         |         |         |         |         |         |         |         |         |          |          |          |          |          |          |          |          |          |          |          |          |          |          |          |          |          |          |          |          |          |          |          |          |          |          |

|    |          |          |          |           |           |           |
|----|----------|----------|----------|-----------|-----------|-----------|
| C  | -5.08375 | 0.18956  | -0.06765 | 417.4960  | 428.0093  | 447.5431  |
| H  | -5.00017 | 1.84900  | -1.43752 | 460.7187  | 464.6349  | 468.3809  |
| H  | -4.87690 | -1.41985 | 1.34743  | 478.7743  | 485.1076  | 486.9784  |
| H  | -6.15469 | 0.05672  | -0.17966 | 493.9093  | 496.4860  | 534.8229  |
| C  | 1.03275  | 1.60972  | 0.04286  | 537.2614  | 552.9267  | 559.4307  |
| C  | 1.58869  | 1.31970  | 1.29532  | 570.6039  | 583.7261  | 584.5610  |
| C  | 1.84875  | 1.98202  | -1.02740 | 593.9945  | 597.5379  | 601.8667  |
| C  | 2.97003  | 1.36227  | 1.45493  | 621.2642  | 625.8140  | 628.2226  |
| H  | 0.92854  | 1.09680  | 2.12790  | 675.7249  | 677.6392  | 686.1341  |
| C  | 3.23170  | 1.99738  | -0.86467 | 687.6002  | 699.8092  | 711.5534  |
| H  | 1.38538  | 2.24928  | -1.97212 | 714.3414  | 720.2738  | 723.7996  |
| C  | 3.79323  | 1.68392  | 0.37297  | 740.8411  | 742.9754  | 754.6874  |
| H  | 3.40717  | 1.16948  | 2.42960  | 765.8701  | 768.6118  | 772.7690  |
| H  | 3.86928  | 2.27642  | -1.69672 | 787.5388  | 801.5735  | 814.0607  |
| H  | 4.86928  | 1.72260  | 0.50506  | 818.7231  | 824.4063  | 834.4182  |
| Cs | 1.13863  | -1.78685 | -0.24190 | 843.6472  | 854.4404  | 856.9460  |
| C  | -2.47342 | 3.43093  | -0.00949 | 863.0585  | 864.7319  | 868.1693  |
| C  | -3.82339 | -1.41770 | -0.02924 | 876.9316  | 881.9860  | 886.7396  |
| C  | -5.04390 | 0.68674  | -0.04268 | 902.1006  | 915.6667  | 937.8249  |
| C  | -3.70087 | 2.84513  | -0.02388 | 941.7732  | 948.8682  | 954.1909  |
| H  | -2.37687 | 4.51148  | -0.00260 | 974.0706  | 981.6770  | 982.7704  |
| C  | -3.70086 | -2.84511 | -0.02396 | 983.1270  | 1001.0941 | 1011.2790 |
| C  | -5.04390 | -0.68672 | -0.04268 | 1013.3705 | 1016.4351 | 1016.8908 |
| C  | -1.25756 | -2.64674 | 0.00047  | 1017.9616 | 1020.5212 | 1021.1910 |
| H  | -5.98116 | 1.23509  | -0.05313 | 1021.7341 | 1025.0594 | 1036.2276 |
| H  | -4.60015 | 3.45511  | -0.02958 | 1046.7399 | 1059.6774 | 1060.4257 |
| C  | -2.47341 | -3.43094 | -0.00962 | 1112.4856 | 1114.1733 | 1120.4781 |
| H  | -4.60014 | -3.45510 | -0.02964 | 1134.0590 | 1140.9502 | 1159.2913 |
| H  | -5.98117 | -1.23506 | -0.05312 | 1170.1461 | 1173.5701 | 1180.6729 |
| H  | -2.37687 | -4.51149 | -0.00276 | 1181.6421 | 1183.2365 | 1185.0169 |
| N  | -1.38780 | 1.30028  | -0.01186 | 1185.1563 | 1189.7594 | 1229.3155 |
| N  | -1.38782 | -1.30028 | -0.01191 | 1230.3243 | 1236.3827 | 1240.2434 |
| H  | 0.00022  | -0.00008 | 1.45530  | 1244.5255 | 1256.4752 | 1257.8219 |
| C  | -0.00001 | 3.27742  | 0.01504  | 1269.8818 | 1280.4042 | 1289.4282 |
| H  | -0.00000 | 4.36099  | 0.02340  | 1298.8794 | 1323.7714 | 1334.7467 |
| C  | -0.00000 | -3.27741 | 0.01489  | 1342.9418 | 1364.0926 | 1373.1070 |
| H  | 0.00001  | -4.36099 | 0.02318  | 1377.0020 | 1393.0813 | 1411.5410 |
|    |          |          |          | 1416.8327 | 1433.2380 | 1449.8890 |
|    |          |          |          | 1452.7639 | 1461.9400 | 1471.9898 |
|    |          |          |          | 1475.5612 | 1477.9980 | 1481.7677 |
|    |          |          |          | 1490.1568 | 1502.7049 | 1509.5158 |
|    |          |          |          | 1517.4580 | 1521.7383 | 1532.1134 |
|    |          |          |          | 1541.7223 | 1565.9377 | 1568.1473 |
|    |          |          |          | 1577.8196 | 1622.2583 | 1637.9606 |
|    |          |          |          | 1642.0770 | 1655.7409 | 1672.3696 |
|    |          |          |          | 1678.2723 | 1685.0650 | 1689.4358 |
|    |          |          |          | 1696.0079 | 1700.4175 | 1701.7761 |
|    |          |          |          | 1707.0684 | 1717.9543 | 1866.4109 |
|    |          |          |          | 3203.2935 | 3204.2456 | 3204.9031 |
|    |          |          |          | 3206.2249 | 3208.3278 | 3208.4767 |
|    |          |          |          | 3208.5540 | 3211.2299 | 3213.6162 |
|    |          |          |          | 3217.8337 | 3223.7930 | 3224.7371 |
|    |          |          |          | 3225.1668 | 3226.5212 | 3226.6296 |
|    |          |          |          | 3226.8342 | 3227.7438 | 3227.9506 |

|                                           |                                                 |           |           |
|-------------------------------------------|-------------------------------------------------|-----------|-----------|
|                                           | 3231.4542                                       | 3233.6364 | 3243.1953 |
|                                           | 3243.5400                                       | 3256.9128 | 3261.0160 |
| <b>Statistical Thermodynamic Analysis</b> |                                                 |           |           |
| Temperature = 403.15 K                    | Pressure = 1 atm                                |           |           |
| Zero-point correction = 0.542628          | Electronic Energy = -1955.73859903              |           |           |
| Internal Energy (E) = -1955.13425203      | Enthalpy (H) = -1955.13297603                   |           |           |
| Gibbs Free Energy (G) = -1955.30139303    | Gibbs Free Energy of Solvation = -1955.36795181 |           |           |

| St. Point                       | General Structure                                                                                                                                                                                                                                                                                                                                                                                                                                                                                                                                                                                                                                                                                                                                                                                                                                                                                                                                                                                                                                                                                                                                                                                                                                                                                                                                                                                                                                                                                                                                                                                                                                                                                                                                                                                                                                                         | Ball & Stick model                                                                 |          |   |   |   |          |         |          |   |          |         |         |   |          |         |         |   |          |         |          |   |          |          |         |   |          |         |          |   |          |         |          |   |          |          |         |   |          |          |         |   |          |         |          |   |          |         |          |   |          |          |         |   |          |         |          |   |         |         |         |   |         |         |         |   |         |         |          |   |         |         |         |   |         |         |         |   |         |         |          |   |         |         |          |   |         |         |         |   |         |         |         |   |         |         |          |                                                                                                                                                                                                                                                                                                                                                                                                                                                                                                                                                                                                                                                                                                                                                                                                                                                                                                                                                                                                                                                                                                                                                                                                                                                                                                                                                                                                                                                                                                                                                                                                                                                                                                                                                                                                       |         |         |         |         |         |         |         |         |         |         |         |         |          |          |          |          |          |          |          |          |          |          |          |          |          |          |          |          |          |          |          |          |          |          |          |          |          |          |          |          |          |          |          |          |          |          |          |          |          |          |          |          |          |          |          |          |          |          |          |          |          |          |          |          |          |          |          |          |          |          |          |          |          |          |          |          |          |          |          |          |          |
|---------------------------------|---------------------------------------------------------------------------------------------------------------------------------------------------------------------------------------------------------------------------------------------------------------------------------------------------------------------------------------------------------------------------------------------------------------------------------------------------------------------------------------------------------------------------------------------------------------------------------------------------------------------------------------------------------------------------------------------------------------------------------------------------------------------------------------------------------------------------------------------------------------------------------------------------------------------------------------------------------------------------------------------------------------------------------------------------------------------------------------------------------------------------------------------------------------------------------------------------------------------------------------------------------------------------------------------------------------------------------------------------------------------------------------------------------------------------------------------------------------------------------------------------------------------------------------------------------------------------------------------------------------------------------------------------------------------------------------------------------------------------------------------------------------------------------------------------------------------------------------------------------------------------|------------------------------------------------------------------------------------|----------|---|---|---|----------|---------|----------|---|----------|---------|---------|---|----------|---------|---------|---|----------|---------|----------|---|----------|----------|---------|---|----------|---------|----------|---|----------|---------|----------|---|----------|----------|---------|---|----------|----------|---------|---|----------|---------|----------|---|----------|---------|----------|---|----------|----------|---------|---|----------|---------|----------|---|---------|---------|---------|---|---------|---------|---------|---|---------|---------|----------|---|---------|---------|---------|---|---------|---------|---------|---|---------|---------|----------|---|---------|---------|----------|---|---------|---------|---------|---|---------|---------|---------|---|---------|---------|----------|-------------------------------------------------------------------------------------------------------------------------------------------------------------------------------------------------------------------------------------------------------------------------------------------------------------------------------------------------------------------------------------------------------------------------------------------------------------------------------------------------------------------------------------------------------------------------------------------------------------------------------------------------------------------------------------------------------------------------------------------------------------------------------------------------------------------------------------------------------------------------------------------------------------------------------------------------------------------------------------------------------------------------------------------------------------------------------------------------------------------------------------------------------------------------------------------------------------------------------------------------------------------------------------------------------------------------------------------------------------------------------------------------------------------------------------------------------------------------------------------------------------------------------------------------------------------------------------------------------------------------------------------------------------------------------------------------------------------------------------------------------------------------------------------------------|---------|---------|---------|---------|---------|---------|---------|---------|---------|---------|---------|---------|----------|----------|----------|----------|----------|----------|----------|----------|----------|----------|----------|----------|----------|----------|----------|----------|----------|----------|----------|----------|----------|----------|----------|----------|----------|----------|----------|----------|----------|----------|----------|----------|----------|----------|----------|----------|----------|----------|----------|----------|----------|----------|----------|----------|----------|----------|----------|----------|----------|----------|----------|----------|----------|----------|----------|----------|----------|----------|----------|----------|----------|----------|----------|----------|----------|----------|----------|----------|----------|
| <b>13</b> <sup>Hyd(Spill)</sup> | 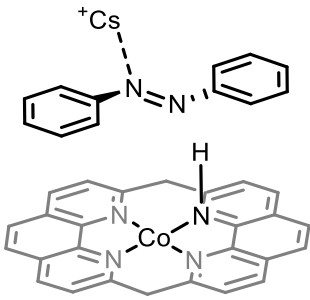                                                                                                                                                                                                                                                                                                                                                                                                                                                                                                                                                                                                                                                                                                                                                                                                                                                                                                                                                                                                                                                                                                                                                                                                                                                                                                                                                                                                                                                                                                                                                                                                                                                                                                                                                                                         |  |          |   |   |   |          |         |          |   |          |         |         |   |          |         |         |   |          |         |          |   |          |          |         |   |          |         |          |   |          |         |          |   |          |          |         |   |          |          |         |   |          |         |          |   |          |         |          |   |          |          |         |   |          |         |          |   |         |         |         |   |         |         |         |   |         |         |          |   |         |         |         |   |         |         |         |   |         |         |          |   |         |         |          |   |         |         |         |   |         |         |         |   |         |         |          |                                                                                                                                                                                                                                                                                                                                                                                                                                                                                                                                                                                                                                                                                                                                                                                                                                                                                                                                                                                                                                                                                                                                                                                                                                                                                                                                                                                                                                                                                                                                                                                                                                                                                                                                                                                                       |         |         |         |         |         |         |         |         |         |         |         |         |          |          |          |          |          |          |          |          |          |          |          |          |          |          |          |          |          |          |          |          |          |          |          |          |          |          |          |          |          |          |          |          |          |          |          |          |          |          |          |          |          |          |          |          |          |          |          |          |          |          |          |          |          |          |          |          |          |          |          |          |          |          |          |          |          |          |          |          |          |
|                                 | <p style="text-align: center;"><b>Cartesian coordinate</b></p> <p>-----</p> <table border="1"> <thead> <tr> <th>Atoms</th> <th>X</th> <th>Y</th> <th>Z</th> </tr> </thead> <tbody> <tr><td>N</td><td>-0.36540</td><td>1.54303</td><td>-0.20810</td></tr> <tr><td>N</td><td>-0.94090</td><td>0.62812</td><td>0.41698</td></tr> <tr><td>C</td><td>-2.34640</td><td>0.54230</td><td>0.21341</td></tr> <tr><td>C</td><td>-3.06482</td><td>1.38661</td><td>-0.64205</td></tr> <tr><td>C</td><td>-2.99530</td><td>-0.46633</td><td>0.92784</td></tr> <tr><td>C</td><td>-4.43204</td><td>1.20114</td><td>-0.77872</td></tr> <tr><td>H</td><td>-2.54390</td><td>2.17073</td><td>-1.17886</td></tr> <tr><td>C</td><td>-4.36764</td><td>-0.64278</td><td>0.78822</td></tr> <tr><td>H</td><td>-2.41579</td><td>-1.08523</td><td>1.60713</td></tr> <tr><td>C</td><td>-5.08375</td><td>0.18956</td><td>-0.06765</td></tr> <tr><td>H</td><td>-5.00017</td><td>1.84900</td><td>-1.43752</td></tr> <tr><td>H</td><td>-4.87690</td><td>-1.41985</td><td>1.34743</td></tr> <tr><td>H</td><td>-6.15469</td><td>0.05672</td><td>-0.17966</td></tr> <tr><td>C</td><td>1.03275</td><td>1.60972</td><td>0.04286</td></tr> <tr><td>C</td><td>1.58869</td><td>1.31970</td><td>1.29532</td></tr> <tr><td>C</td><td>1.84875</td><td>1.98202</td><td>-1.02740</td></tr> <tr><td>C</td><td>2.97003</td><td>1.36227</td><td>1.45493</td></tr> <tr><td>H</td><td>0.92854</td><td>1.09680</td><td>2.12790</td></tr> <tr><td>C</td><td>3.23170</td><td>1.99738</td><td>-0.86467</td></tr> <tr><td>H</td><td>1.38538</td><td>2.24928</td><td>-1.97212</td></tr> <tr><td>C</td><td>3.79323</td><td>1.68392</td><td>0.37297</td></tr> <tr><td>H</td><td>3.40717</td><td>1.16948</td><td>2.42960</td></tr> <tr><td>H</td><td>3.86928</td><td>2.27642</td><td>-1.69672</td></tr> </tbody> </table> <p>-----</p> | Atoms                                                                              | X        | Y | Z | N | -0.36540 | 1.54303 | -0.20810 | N | -0.94090 | 0.62812 | 0.41698 | C | -2.34640 | 0.54230 | 0.21341 | C | -3.06482 | 1.38661 | -0.64205 | C | -2.99530 | -0.46633 | 0.92784 | C | -4.43204 | 1.20114 | -0.77872 | H | -2.54390 | 2.17073 | -1.17886 | C | -4.36764 | -0.64278 | 0.78822 | H | -2.41579 | -1.08523 | 1.60713 | C | -5.08375 | 0.18956 | -0.06765 | H | -5.00017 | 1.84900 | -1.43752 | H | -4.87690 | -1.41985 | 1.34743 | H | -6.15469 | 0.05672 | -0.17966 | C | 1.03275 | 1.60972 | 0.04286 | C | 1.58869 | 1.31970 | 1.29532 | C | 1.84875 | 1.98202 | -1.02740 | C | 2.97003 | 1.36227 | 1.45493 | H | 0.92854 | 1.09680 | 2.12790 | C | 3.23170 | 1.99738 | -0.86467 | H | 1.38538 | 2.24928 | -1.97212 | C | 3.79323 | 1.68392 | 0.37297 | H | 3.40717 | 1.16948 | 2.42960 | H | 3.86928 | 2.27642 | -1.69672 | <p style="text-align: center;"><b>Frequencies</b></p> <table border="1"> <tbody> <tr><td>16.6981</td><td>24.4283</td><td>27.3806</td></tr> <tr><td>33.0649</td><td>41.4118</td><td>45.5332</td></tr> <tr><td>52.4172</td><td>55.0044</td><td>66.9501</td></tr> <tr><td>75.6046</td><td>89.8118</td><td>91.9969</td></tr> <tr><td>100.0517</td><td>102.7922</td><td>120.0549</td></tr> <tr><td>136.8538</td><td>152.8329</td><td>165.3827</td></tr> <tr><td>179.9798</td><td>207.4949</td><td>223.5079</td></tr> <tr><td>232.0909</td><td>235.2116</td><td>241.5448</td></tr> <tr><td>249.5086</td><td>257.4604</td><td>265.2142</td></tr> <tr><td>288.5523</td><td>293.5324</td><td>297.3585</td></tr> <tr><td>319.2358</td><td>340.3852</td><td>344.2942</td></tr> <tr><td>365.6314</td><td>371.5490</td><td>381.4601</td></tr> <tr><td>390.5941</td><td>404.4503</td><td>416.2061</td></tr> <tr><td>426.0088</td><td>435.3637</td><td>443.2499</td></tr> <tr><td>454.7636</td><td>467.4870</td><td>470.9229</td></tr> <tr><td>478.0321</td><td>482.1971</td><td>487.2246</td></tr> <tr><td>492.6701</td><td>529.6536</td><td>539.6676</td></tr> <tr><td>545.4279</td><td>552.3079</td><td>560.5963</td></tr> <tr><td>564.8906</td><td>574.1963</td><td>582.9631</td></tr> <tr><td>592.4989</td><td>599.8486</td><td>616.3173</td></tr> <tr><td>624.0227</td><td>629.7763</td><td>649.9554</td></tr> <tr><td>655.0886</td><td>674.9909</td><td>680.3601</td></tr> <tr><td>693.1212</td><td>699.2717</td><td>706.9245</td></tr> <tr><td>712.6924</td><td>715.5989</td><td>717.8017</td></tr> <tr><td>728.8363</td><td>751.8030</td><td>756.2793</td></tr> <tr><td>763.8595</td><td>778.9907</td><td>779.5007</td></tr> <tr><td>797.5079</td><td>805.2352</td><td>817.5095</td></tr> </tbody> </table> | 16.6981 | 24.4283 | 27.3806 | 33.0649 | 41.4118 | 45.5332 | 52.4172 | 55.0044 | 66.9501 | 75.6046 | 89.8118 | 91.9969 | 100.0517 | 102.7922 | 120.0549 | 136.8538 | 152.8329 | 165.3827 | 179.9798 | 207.4949 | 223.5079 | 232.0909 | 235.2116 | 241.5448 | 249.5086 | 257.4604 | 265.2142 | 288.5523 | 293.5324 | 297.3585 | 319.2358 | 340.3852 | 344.2942 | 365.6314 | 371.5490 | 381.4601 | 390.5941 | 404.4503 | 416.2061 | 426.0088 | 435.3637 | 443.2499 | 454.7636 | 467.4870 | 470.9229 | 478.0321 | 482.1971 | 487.2246 | 492.6701 | 529.6536 | 539.6676 | 545.4279 | 552.3079 | 560.5963 | 564.8906 | 574.1963 | 582.9631 | 592.4989 | 599.8486 | 616.3173 | 624.0227 | 629.7763 | 649.9554 | 655.0886 | 674.9909 | 680.3601 | 693.1212 | 699.2717 | 706.9245 | 712.6924 | 715.5989 | 717.8017 | 728.8363 | 751.8030 | 756.2793 | 763.8595 | 778.9907 | 779.5007 | 797.5079 | 805.2352 | 817.5095 |
| Atoms                           | X                                                                                                                                                                                                                                                                                                                                                                                                                                                                                                                                                                                                                                                                                                                                                                                                                                                                                                                                                                                                                                                                                                                                                                                                                                                                                                                                                                                                                                                                                                                                                                                                                                                                                                                                                                                                                                                                         | Y                                                                                  | Z        |   |   |   |          |         |          |   |          |         |         |   |          |         |         |   |          |         |          |   |          |          |         |   |          |         |          |   |          |         |          |   |          |          |         |   |          |          |         |   |          |         |          |   |          |         |          |   |          |          |         |   |          |         |          |   |         |         |         |   |         |         |         |   |         |         |          |   |         |         |         |   |         |         |         |   |         |         |          |   |         |         |          |   |         |         |         |   |         |         |         |   |         |         |          |                                                                                                                                                                                                                                                                                                                                                                                                                                                                                                                                                                                                                                                                                                                                                                                                                                                                                                                                                                                                                                                                                                                                                                                                                                                                                                                                                                                                                                                                                                                                                                                                                                                                                                                                                                                                       |         |         |         |         |         |         |         |         |         |         |         |         |          |          |          |          |          |          |          |          |          |          |          |          |          |          |          |          |          |          |          |          |          |          |          |          |          |          |          |          |          |          |          |          |          |          |          |          |          |          |          |          |          |          |          |          |          |          |          |          |          |          |          |          |          |          |          |          |          |          |          |          |          |          |          |          |          |          |          |          |          |
| N                               | -0.36540                                                                                                                                                                                                                                                                                                                                                                                                                                                                                                                                                                                                                                                                                                                                                                                                                                                                                                                                                                                                                                                                                                                                                                                                                                                                                                                                                                                                                                                                                                                                                                                                                                                                                                                                                                                                                                                                  | 1.54303                                                                            | -0.20810 |   |   |   |          |         |          |   |          |         |         |   |          |         |         |   |          |         |          |   |          |          |         |   |          |         |          |   |          |         |          |   |          |          |         |   |          |          |         |   |          |         |          |   |          |         |          |   |          |          |         |   |          |         |          |   |         |         |         |   |         |         |         |   |         |         |          |   |         |         |         |   |         |         |         |   |         |         |          |   |         |         |          |   |         |         |         |   |         |         |         |   |         |         |          |                                                                                                                                                                                                                                                                                                                                                                                                                                                                                                                                                                                                                                                                                                                                                                                                                                                                                                                                                                                                                                                                                                                                                                                                                                                                                                                                                                                                                                                                                                                                                                                                                                                                                                                                                                                                       |         |         |         |         |         |         |         |         |         |         |         |         |          |          |          |          |          |          |          |          |          |          |          |          |          |          |          |          |          |          |          |          |          |          |          |          |          |          |          |          |          |          |          |          |          |          |          |          |          |          |          |          |          |          |          |          |          |          |          |          |          |          |          |          |          |          |          |          |          |          |          |          |          |          |          |          |          |          |          |          |          |
| N                               | -0.94090                                                                                                                                                                                                                                                                                                                                                                                                                                                                                                                                                                                                                                                                                                                                                                                                                                                                                                                                                                                                                                                                                                                                                                                                                                                                                                                                                                                                                                                                                                                                                                                                                                                                                                                                                                                                                                                                  | 0.62812                                                                            | 0.41698  |   |   |   |          |         |          |   |          |         |         |   |          |         |         |   |          |         |          |   |          |          |         |   |          |         |          |   |          |         |          |   |          |          |         |   |          |          |         |   |          |         |          |   |          |         |          |   |          |          |         |   |          |         |          |   |         |         |         |   |         |         |         |   |         |         |          |   |         |         |         |   |         |         |         |   |         |         |          |   |         |         |          |   |         |         |         |   |         |         |         |   |         |         |          |                                                                                                                                                                                                                                                                                                                                                                                                                                                                                                                                                                                                                                                                                                                                                                                                                                                                                                                                                                                                                                                                                                                                                                                                                                                                                                                                                                                                                                                                                                                                                                                                                                                                                                                                                                                                       |         |         |         |         |         |         |         |         |         |         |         |         |          |          |          |          |          |          |          |          |          |          |          |          |          |          |          |          |          |          |          |          |          |          |          |          |          |          |          |          |          |          |          |          |          |          |          |          |          |          |          |          |          |          |          |          |          |          |          |          |          |          |          |          |          |          |          |          |          |          |          |          |          |          |          |          |          |          |          |          |          |
| C                               | -2.34640                                                                                                                                                                                                                                                                                                                                                                                                                                                                                                                                                                                                                                                                                                                                                                                                                                                                                                                                                                                                                                                                                                                                                                                                                                                                                                                                                                                                                                                                                                                                                                                                                                                                                                                                                                                                                                                                  | 0.54230                                                                            | 0.21341  |   |   |   |          |         |          |   |          |         |         |   |          |         |         |   |          |         |          |   |          |          |         |   |          |         |          |   |          |         |          |   |          |          |         |   |          |          |         |   |          |         |          |   |          |         |          |   |          |          |         |   |          |         |          |   |         |         |         |   |         |         |         |   |         |         |          |   |         |         |         |   |         |         |         |   |         |         |          |   |         |         |          |   |         |         |         |   |         |         |         |   |         |         |          |                                                                                                                                                                                                                                                                                                                                                                                                                                                                                                                                                                                                                                                                                                                                                                                                                                                                                                                                                                                                                                                                                                                                                                                                                                                                                                                                                                                                                                                                                                                                                                                                                                                                                                                                                                                                       |         |         |         |         |         |         |         |         |         |         |         |         |          |          |          |          |          |          |          |          |          |          |          |          |          |          |          |          |          |          |          |          |          |          |          |          |          |          |          |          |          |          |          |          |          |          |          |          |          |          |          |          |          |          |          |          |          |          |          |          |          |          |          |          |          |          |          |          |          |          |          |          |          |          |          |          |          |          |          |          |          |
| C                               | -3.06482                                                                                                                                                                                                                                                                                                                                                                                                                                                                                                                                                                                                                                                                                                                                                                                                                                                                                                                                                                                                                                                                                                                                                                                                                                                                                                                                                                                                                                                                                                                                                                                                                                                                                                                                                                                                                                                                  | 1.38661                                                                            | -0.64205 |   |   |   |          |         |          |   |          |         |         |   |          |         |         |   |          |         |          |   |          |          |         |   |          |         |          |   |          |         |          |   |          |          |         |   |          |          |         |   |          |         |          |   |          |         |          |   |          |          |         |   |          |         |          |   |         |         |         |   |         |         |         |   |         |         |          |   |         |         |         |   |         |         |         |   |         |         |          |   |         |         |          |   |         |         |         |   |         |         |         |   |         |         |          |                                                                                                                                                                                                                                                                                                                                                                                                                                                                                                                                                                                                                                                                                                                                                                                                                                                                                                                                                                                                                                                                                                                                                                                                                                                                                                                                                                                                                                                                                                                                                                                                                                                                                                                                                                                                       |         |         |         |         |         |         |         |         |         |         |         |         |          |          |          |          |          |          |          |          |          |          |          |          |          |          |          |          |          |          |          |          |          |          |          |          |          |          |          |          |          |          |          |          |          |          |          |          |          |          |          |          |          |          |          |          |          |          |          |          |          |          |          |          |          |          |          |          |          |          |          |          |          |          |          |          |          |          |          |          |          |
| C                               | -2.99530                                                                                                                                                                                                                                                                                                                                                                                                                                                                                                                                                                                                                                                                                                                                                                                                                                                                                                                                                                                                                                                                                                                                                                                                                                                                                                                                                                                                                                                                                                                                                                                                                                                                                                                                                                                                                                                                  | -0.46633                                                                           | 0.92784  |   |   |   |          |         |          |   |          |         |         |   |          |         |         |   |          |         |          |   |          |          |         |   |          |         |          |   |          |         |          |   |          |          |         |   |          |          |         |   |          |         |          |   |          |         |          |   |          |          |         |   |          |         |          |   |         |         |         |   |         |         |         |   |         |         |          |   |         |         |         |   |         |         |         |   |         |         |          |   |         |         |          |   |         |         |         |   |         |         |         |   |         |         |          |                                                                                                                                                                                                                                                                                                                                                                                                                                                                                                                                                                                                                                                                                                                                                                                                                                                                                                                                                                                                                                                                                                                                                                                                                                                                                                                                                                                                                                                                                                                                                                                                                                                                                                                                                                                                       |         |         |         |         |         |         |         |         |         |         |         |         |          |          |          |          |          |          |          |          |          |          |          |          |          |          |          |          |          |          |          |          |          |          |          |          |          |          |          |          |          |          |          |          |          |          |          |          |          |          |          |          |          |          |          |          |          |          |          |          |          |          |          |          |          |          |          |          |          |          |          |          |          |          |          |          |          |          |          |          |          |
| C                               | -4.43204                                                                                                                                                                                                                                                                                                                                                                                                                                                                                                                                                                                                                                                                                                                                                                                                                                                                                                                                                                                                                                                                                                                                                                                                                                                                                                                                                                                                                                                                                                                                                                                                                                                                                                                                                                                                                                                                  | 1.20114                                                                            | -0.77872 |   |   |   |          |         |          |   |          |         |         |   |          |         |         |   |          |         |          |   |          |          |         |   |          |         |          |   |          |         |          |   |          |          |         |   |          |          |         |   |          |         |          |   |          |         |          |   |          |          |         |   |          |         |          |   |         |         |         |   |         |         |         |   |         |         |          |   |         |         |         |   |         |         |         |   |         |         |          |   |         |         |          |   |         |         |         |   |         |         |         |   |         |         |          |                                                                                                                                                                                                                                                                                                                                                                                                                                                                                                                                                                                                                                                                                                                                                                                                                                                                                                                                                                                                                                                                                                                                                                                                                                                                                                                                                                                                                                                                                                                                                                                                                                                                                                                                                                                                       |         |         |         |         |         |         |         |         |         |         |         |         |          |          |          |          |          |          |          |          |          |          |          |          |          |          |          |          |          |          |          |          |          |          |          |          |          |          |          |          |          |          |          |          |          |          |          |          |          |          |          |          |          |          |          |          |          |          |          |          |          |          |          |          |          |          |          |          |          |          |          |          |          |          |          |          |          |          |          |          |          |
| H                               | -2.54390                                                                                                                                                                                                                                                                                                                                                                                                                                                                                                                                                                                                                                                                                                                                                                                                                                                                                                                                                                                                                                                                                                                                                                                                                                                                                                                                                                                                                                                                                                                                                                                                                                                                                                                                                                                                                                                                  | 2.17073                                                                            | -1.17886 |   |   |   |          |         |          |   |          |         |         |   |          |         |         |   |          |         |          |   |          |          |         |   |          |         |          |   |          |         |          |   |          |          |         |   |          |          |         |   |          |         |          |   |          |         |          |   |          |          |         |   |          |         |          |   |         |         |         |   |         |         |         |   |         |         |          |   |         |         |         |   |         |         |         |   |         |         |          |   |         |         |          |   |         |         |         |   |         |         |         |   |         |         |          |                                                                                                                                                                                                                                                                                                                                                                                                                                                                                                                                                                                                                                                                                                                                                                                                                                                                                                                                                                                                                                                                                                                                                                                                                                                                                                                                                                                                                                                                                                                                                                                                                                                                                                                                                                                                       |         |         |         |         |         |         |         |         |         |         |         |         |          |          |          |          |          |          |          |          |          |          |          |          |          |          |          |          |          |          |          |          |          |          |          |          |          |          |          |          |          |          |          |          |          |          |          |          |          |          |          |          |          |          |          |          |          |          |          |          |          |          |          |          |          |          |          |          |          |          |          |          |          |          |          |          |          |          |          |          |          |
| C                               | -4.36764                                                                                                                                                                                                                                                                                                                                                                                                                                                                                                                                                                                                                                                                                                                                                                                                                                                                                                                                                                                                                                                                                                                                                                                                                                                                                                                                                                                                                                                                                                                                                                                                                                                                                                                                                                                                                                                                  | -0.64278                                                                           | 0.78822  |   |   |   |          |         |          |   |          |         |         |   |          |         |         |   |          |         |          |   |          |          |         |   |          |         |          |   |          |         |          |   |          |          |         |   |          |          |         |   |          |         |          |   |          |         |          |   |          |          |         |   |          |         |          |   |         |         |         |   |         |         |         |   |         |         |          |   |         |         |         |   |         |         |         |   |         |         |          |   |         |         |          |   |         |         |         |   |         |         |         |   |         |         |          |                                                                                                                                                                                                                                                                                                                                                                                                                                                                                                                                                                                                                                                                                                                                                                                                                                                                                                                                                                                                                                                                                                                                                                                                                                                                                                                                                                                                                                                                                                                                                                                                                                                                                                                                                                                                       |         |         |         |         |         |         |         |         |         |         |         |         |          |          |          |          |          |          |          |          |          |          |          |          |          |          |          |          |          |          |          |          |          |          |          |          |          |          |          |          |          |          |          |          |          |          |          |          |          |          |          |          |          |          |          |          |          |          |          |          |          |          |          |          |          |          |          |          |          |          |          |          |          |          |          |          |          |          |          |          |          |
| H                               | -2.41579                                                                                                                                                                                                                                                                                                                                                                                                                                                                                                                                                                                                                                                                                                                                                                                                                                                                                                                                                                                                                                                                                                                                                                                                                                                                                                                                                                                                                                                                                                                                                                                                                                                                                                                                                                                                                                                                  | -1.08523                                                                           | 1.60713  |   |   |   |          |         |          |   |          |         |         |   |          |         |         |   |          |         |          |   |          |          |         |   |          |         |          |   |          |         |          |   |          |          |         |   |          |          |         |   |          |         |          |   |          |         |          |   |          |          |         |   |          |         |          |   |         |         |         |   |         |         |         |   |         |         |          |   |         |         |         |   |         |         |         |   |         |         |          |   |         |         |          |   |         |         |         |   |         |         |         |   |         |         |          |                                                                                                                                                                                                                                                                                                                                                                                                                                                                                                                                                                                                                                                                                                                                                                                                                                                                                                                                                                                                                                                                                                                                                                                                                                                                                                                                                                                                                                                                                                                                                                                                                                                                                                                                                                                                       |         |         |         |         |         |         |         |         |         |         |         |         |          |          |          |          |          |          |          |          |          |          |          |          |          |          |          |          |          |          |          |          |          |          |          |          |          |          |          |          |          |          |          |          |          |          |          |          |          |          |          |          |          |          |          |          |          |          |          |          |          |          |          |          |          |          |          |          |          |          |          |          |          |          |          |          |          |          |          |          |          |
| C                               | -5.08375                                                                                                                                                                                                                                                                                                                                                                                                                                                                                                                                                                                                                                                                                                                                                                                                                                                                                                                                                                                                                                                                                                                                                                                                                                                                                                                                                                                                                                                                                                                                                                                                                                                                                                                                                                                                                                                                  | 0.18956                                                                            | -0.06765 |   |   |   |          |         |          |   |          |         |         |   |          |         |         |   |          |         |          |   |          |          |         |   |          |         |          |   |          |         |          |   |          |          |         |   |          |          |         |   |          |         |          |   |          |         |          |   |          |          |         |   |          |         |          |   |         |         |         |   |         |         |         |   |         |         |          |   |         |         |         |   |         |         |         |   |         |         |          |   |         |         |          |   |         |         |         |   |         |         |         |   |         |         |          |                                                                                                                                                                                                                                                                                                                                                                                                                                                                                                                                                                                                                                                                                                                                                                                                                                                                                                                                                                                                                                                                                                                                                                                                                                                                                                                                                                                                                                                                                                                                                                                                                                                                                                                                                                                                       |         |         |         |         |         |         |         |         |         |         |         |         |          |          |          |          |          |          |          |          |          |          |          |          |          |          |          |          |          |          |          |          |          |          |          |          |          |          |          |          |          |          |          |          |          |          |          |          |          |          |          |          |          |          |          |          |          |          |          |          |          |          |          |          |          |          |          |          |          |          |          |          |          |          |          |          |          |          |          |          |          |
| H                               | -5.00017                                                                                                                                                                                                                                                                                                                                                                                                                                                                                                                                                                                                                                                                                                                                                                                                                                                                                                                                                                                                                                                                                                                                                                                                                                                                                                                                                                                                                                                                                                                                                                                                                                                                                                                                                                                                                                                                  | 1.84900                                                                            | -1.43752 |   |   |   |          |         |          |   |          |         |         |   |          |         |         |   |          |         |          |   |          |          |         |   |          |         |          |   |          |         |          |   |          |          |         |   |          |          |         |   |          |         |          |   |          |         |          |   |          |          |         |   |          |         |          |   |         |         |         |   |         |         |         |   |         |         |          |   |         |         |         |   |         |         |         |   |         |         |          |   |         |         |          |   |         |         |         |   |         |         |         |   |         |         |          |                                                                                                                                                                                                                                                                                                                                                                                                                                                                                                                                                                                                                                                                                                                                                                                                                                                                                                                                                                                                                                                                                                                                                                                                                                                                                                                                                                                                                                                                                                                                                                                                                                                                                                                                                                                                       |         |         |         |         |         |         |         |         |         |         |         |         |          |          |          |          |          |          |          |          |          |          |          |          |          |          |          |          |          |          |          |          |          |          |          |          |          |          |          |          |          |          |          |          |          |          |          |          |          |          |          |          |          |          |          |          |          |          |          |          |          |          |          |          |          |          |          |          |          |          |          |          |          |          |          |          |          |          |          |          |          |
| H                               | -4.87690                                                                                                                                                                                                                                                                                                                                                                                                                                                                                                                                                                                                                                                                                                                                                                                                                                                                                                                                                                                                                                                                                                                                                                                                                                                                                                                                                                                                                                                                                                                                                                                                                                                                                                                                                                                                                                                                  | -1.41985                                                                           | 1.34743  |   |   |   |          |         |          |   |          |         |         |   |          |         |         |   |          |         |          |   |          |          |         |   |          |         |          |   |          |         |          |   |          |          |         |   |          |          |         |   |          |         |          |   |          |         |          |   |          |          |         |   |          |         |          |   |         |         |         |   |         |         |         |   |         |         |          |   |         |         |         |   |         |         |         |   |         |         |          |   |         |         |          |   |         |         |         |   |         |         |         |   |         |         |          |                                                                                                                                                                                                                                                                                                                                                                                                                                                                                                                                                                                                                                                                                                                                                                                                                                                                                                                                                                                                                                                                                                                                                                                                                                                                                                                                                                                                                                                                                                                                                                                                                                                                                                                                                                                                       |         |         |         |         |         |         |         |         |         |         |         |         |          |          |          |          |          |          |          |          |          |          |          |          |          |          |          |          |          |          |          |          |          |          |          |          |          |          |          |          |          |          |          |          |          |          |          |          |          |          |          |          |          |          |          |          |          |          |          |          |          |          |          |          |          |          |          |          |          |          |          |          |          |          |          |          |          |          |          |          |          |
| H                               | -6.15469                                                                                                                                                                                                                                                                                                                                                                                                                                                                                                                                                                                                                                                                                                                                                                                                                                                                                                                                                                                                                                                                                                                                                                                                                                                                                                                                                                                                                                                                                                                                                                                                                                                                                                                                                                                                                                                                  | 0.05672                                                                            | -0.17966 |   |   |   |          |         |          |   |          |         |         |   |          |         |         |   |          |         |          |   |          |          |         |   |          |         |          |   |          |         |          |   |          |          |         |   |          |          |         |   |          |         |          |   |          |         |          |   |          |          |         |   |          |         |          |   |         |         |         |   |         |         |         |   |         |         |          |   |         |         |         |   |         |         |         |   |         |         |          |   |         |         |          |   |         |         |         |   |         |         |         |   |         |         |          |                                                                                                                                                                                                                                                                                                                                                                                                                                                                                                                                                                                                                                                                                                                                                                                                                                                                                                                                                                                                                                                                                                                                                                                                                                                                                                                                                                                                                                                                                                                                                                                                                                                                                                                                                                                                       |         |         |         |         |         |         |         |         |         |         |         |         |          |          |          |          |          |          |          |          |          |          |          |          |          |          |          |          |          |          |          |          |          |          |          |          |          |          |          |          |          |          |          |          |          |          |          |          |          |          |          |          |          |          |          |          |          |          |          |          |          |          |          |          |          |          |          |          |          |          |          |          |          |          |          |          |          |          |          |          |          |
| C                               | 1.03275                                                                                                                                                                                                                                                                                                                                                                                                                                                                                                                                                                                                                                                                                                                                                                                                                                                                                                                                                                                                                                                                                                                                                                                                                                                                                                                                                                                                                                                                                                                                                                                                                                                                                                                                                                                                                                                                   | 1.60972                                                                            | 0.04286  |   |   |   |          |         |          |   |          |         |         |   |          |         |         |   |          |         |          |   |          |          |         |   |          |         |          |   |          |         |          |   |          |          |         |   |          |          |         |   |          |         |          |   |          |         |          |   |          |          |         |   |          |         |          |   |         |         |         |   |         |         |         |   |         |         |          |   |         |         |         |   |         |         |         |   |         |         |          |   |         |         |          |   |         |         |         |   |         |         |         |   |         |         |          |                                                                                                                                                                                                                                                                                                                                                                                                                                                                                                                                                                                                                                                                                                                                                                                                                                                                                                                                                                                                                                                                                                                                                                                                                                                                                                                                                                                                                                                                                                                                                                                                                                                                                                                                                                                                       |         |         |         |         |         |         |         |         |         |         |         |         |          |          |          |          |          |          |          |          |          |          |          |          |          |          |          |          |          |          |          |          |          |          |          |          |          |          |          |          |          |          |          |          |          |          |          |          |          |          |          |          |          |          |          |          |          |          |          |          |          |          |          |          |          |          |          |          |          |          |          |          |          |          |          |          |          |          |          |          |          |
| C                               | 1.58869                                                                                                                                                                                                                                                                                                                                                                                                                                                                                                                                                                                                                                                                                                                                                                                                                                                                                                                                                                                                                                                                                                                                                                                                                                                                                                                                                                                                                                                                                                                                                                                                                                                                                                                                                                                                                                                                   | 1.31970                                                                            | 1.29532  |   |   |   |          |         |          |   |          |         |         |   |          |         |         |   |          |         |          |   |          |          |         |   |          |         |          |   |          |         |          |   |          |          |         |   |          |          |         |   |          |         |          |   |          |         |          |   |          |          |         |   |          |         |          |   |         |         |         |   |         |         |         |   |         |         |          |   |         |         |         |   |         |         |         |   |         |         |          |   |         |         |          |   |         |         |         |   |         |         |         |   |         |         |          |                                                                                                                                                                                                                                                                                                                                                                                                                                                                                                                                                                                                                                                                                                                                                                                                                                                                                                                                                                                                                                                                                                                                                                                                                                                                                                                                                                                                                                                                                                                                                                                                                                                                                                                                                                                                       |         |         |         |         |         |         |         |         |         |         |         |         |          |          |          |          |          |          |          |          |          |          |          |          |          |          |          |          |          |          |          |          |          |          |          |          |          |          |          |          |          |          |          |          |          |          |          |          |          |          |          |          |          |          |          |          |          |          |          |          |          |          |          |          |          |          |          |          |          |          |          |          |          |          |          |          |          |          |          |          |          |
| C                               | 1.84875                                                                                                                                                                                                                                                                                                                                                                                                                                                                                                                                                                                                                                                                                                                                                                                                                                                                                                                                                                                                                                                                                                                                                                                                                                                                                                                                                                                                                                                                                                                                                                                                                                                                                                                                                                                                                                                                   | 1.98202                                                                            | -1.02740 |   |   |   |          |         |          |   |          |         |         |   |          |         |         |   |          |         |          |   |          |          |         |   |          |         |          |   |          |         |          |   |          |          |         |   |          |          |         |   |          |         |          |   |          |         |          |   |          |          |         |   |          |         |          |   |         |         |         |   |         |         |         |   |         |         |          |   |         |         |         |   |         |         |         |   |         |         |          |   |         |         |          |   |         |         |         |   |         |         |         |   |         |         |          |                                                                                                                                                                                                                                                                                                                                                                                                                                                                                                                                                                                                                                                                                                                                                                                                                                                                                                                                                                                                                                                                                                                                                                                                                                                                                                                                                                                                                                                                                                                                                                                                                                                                                                                                                                                                       |         |         |         |         |         |         |         |         |         |         |         |         |          |          |          |          |          |          |          |          |          |          |          |          |          |          |          |          |          |          |          |          |          |          |          |          |          |          |          |          |          |          |          |          |          |          |          |          |          |          |          |          |          |          |          |          |          |          |          |          |          |          |          |          |          |          |          |          |          |          |          |          |          |          |          |          |          |          |          |          |          |
| C                               | 2.97003                                                                                                                                                                                                                                                                                                                                                                                                                                                                                                                                                                                                                                                                                                                                                                                                                                                                                                                                                                                                                                                                                                                                                                                                                                                                                                                                                                                                                                                                                                                                                                                                                                                                                                                                                                                                                                                                   | 1.36227                                                                            | 1.45493  |   |   |   |          |         |          |   |          |         |         |   |          |         |         |   |          |         |          |   |          |          |         |   |          |         |          |   |          |         |          |   |          |          |         |   |          |          |         |   |          |         |          |   |          |         |          |   |          |          |         |   |          |         |          |   |         |         |         |   |         |         |         |   |         |         |          |   |         |         |         |   |         |         |         |   |         |         |          |   |         |         |          |   |         |         |         |   |         |         |         |   |         |         |          |                                                                                                                                                                                                                                                                                                                                                                                                                                                                                                                                                                                                                                                                                                                                                                                                                                                                                                                                                                                                                                                                                                                                                                                                                                                                                                                                                                                                                                                                                                                                                                                                                                                                                                                                                                                                       |         |         |         |         |         |         |         |         |         |         |         |         |          |          |          |          |          |          |          |          |          |          |          |          |          |          |          |          |          |          |          |          |          |          |          |          |          |          |          |          |          |          |          |          |          |          |          |          |          |          |          |          |          |          |          |          |          |          |          |          |          |          |          |          |          |          |          |          |          |          |          |          |          |          |          |          |          |          |          |          |          |
| H                               | 0.92854                                                                                                                                                                                                                                                                                                                                                                                                                                                                                                                                                                                                                                                                                                                                                                                                                                                                                                                                                                                                                                                                                                                                                                                                                                                                                                                                                                                                                                                                                                                                                                                                                                                                                                                                                                                                                                                                   | 1.09680                                                                            | 2.12790  |   |   |   |          |         |          |   |          |         |         |   |          |         |         |   |          |         |          |   |          |          |         |   |          |         |          |   |          |         |          |   |          |          |         |   |          |          |         |   |          |         |          |   |          |         |          |   |          |          |         |   |          |         |          |   |         |         |         |   |         |         |         |   |         |         |          |   |         |         |         |   |         |         |         |   |         |         |          |   |         |         |          |   |         |         |         |   |         |         |         |   |         |         |          |                                                                                                                                                                                                                                                                                                                                                                                                                                                                                                                                                                                                                                                                                                                                                                                                                                                                                                                                                                                                                                                                                                                                                                                                                                                                                                                                                                                                                                                                                                                                                                                                                                                                                                                                                                                                       |         |         |         |         |         |         |         |         |         |         |         |         |          |          |          |          |          |          |          |          |          |          |          |          |          |          |          |          |          |          |          |          |          |          |          |          |          |          |          |          |          |          |          |          |          |          |          |          |          |          |          |          |          |          |          |          |          |          |          |          |          |          |          |          |          |          |          |          |          |          |          |          |          |          |          |          |          |          |          |          |          |
| C                               | 3.23170                                                                                                                                                                                                                                                                                                                                                                                                                                                                                                                                                                                                                                                                                                                                                                                                                                                                                                                                                                                                                                                                                                                                                                                                                                                                                                                                                                                                                                                                                                                                                                                                                                                                                                                                                                                                                                                                   | 1.99738                                                                            | -0.86467 |   |   |   |          |         |          |   |          |         |         |   |          |         |         |   |          |         |          |   |          |          |         |   |          |         |          |   |          |         |          |   |          |          |         |   |          |          |         |   |          |         |          |   |          |         |          |   |          |          |         |   |          |         |          |   |         |         |         |   |         |         |         |   |         |         |          |   |         |         |         |   |         |         |         |   |         |         |          |   |         |         |          |   |         |         |         |   |         |         |         |   |         |         |          |                                                                                                                                                                                                                                                                                                                                                                                                                                                                                                                                                                                                                                                                                                                                                                                                                                                                                                                                                                                                                                                                                                                                                                                                                                                                                                                                                                                                                                                                                                                                                                                                                                                                                                                                                                                                       |         |         |         |         |         |         |         |         |         |         |         |         |          |          |          |          |          |          |          |          |          |          |          |          |          |          |          |          |          |          |          |          |          |          |          |          |          |          |          |          |          |          |          |          |          |          |          |          |          |          |          |          |          |          |          |          |          |          |          |          |          |          |          |          |          |          |          |          |          |          |          |          |          |          |          |          |          |          |          |          |          |
| H                               | 1.38538                                                                                                                                                                                                                                                                                                                                                                                                                                                                                                                                                                                                                                                                                                                                                                                                                                                                                                                                                                                                                                                                                                                                                                                                                                                                                                                                                                                                                                                                                                                                                                                                                                                                                                                                                                                                                                                                   | 2.24928                                                                            | -1.97212 |   |   |   |          |         |          |   |          |         |         |   |          |         |         |   |          |         |          |   |          |          |         |   |          |         |          |   |          |         |          |   |          |          |         |   |          |          |         |   |          |         |          |   |          |         |          |   |          |          |         |   |          |         |          |   |         |         |         |   |         |         |         |   |         |         |          |   |         |         |         |   |         |         |         |   |         |         |          |   |         |         |          |   |         |         |         |   |         |         |         |   |         |         |          |                                                                                                                                                                                                                                                                                                                                                                                                                                                                                                                                                                                                                                                                                                                                                                                                                                                                                                                                                                                                                                                                                                                                                                                                                                                                                                                                                                                                                                                                                                                                                                                                                                                                                                                                                                                                       |         |         |         |         |         |         |         |         |         |         |         |         |          |          |          |          |          |          |          |          |          |          |          |          |          |          |          |          |          |          |          |          |          |          |          |          |          |          |          |          |          |          |          |          |          |          |          |          |          |          |          |          |          |          |          |          |          |          |          |          |          |          |          |          |          |          |          |          |          |          |          |          |          |          |          |          |          |          |          |          |          |
| C                               | 3.79323                                                                                                                                                                                                                                                                                                                                                                                                                                                                                                                                                                                                                                                                                                                                                                                                                                                                                                                                                                                                                                                                                                                                                                                                                                                                                                                                                                                                                                                                                                                                                                                                                                                                                                                                                                                                                                                                   | 1.68392                                                                            | 0.37297  |   |   |   |          |         |          |   |          |         |         |   |          |         |         |   |          |         |          |   |          |          |         |   |          |         |          |   |          |         |          |   |          |          |         |   |          |          |         |   |          |         |          |   |          |         |          |   |          |          |         |   |          |         |          |   |         |         |         |   |         |         |         |   |         |         |          |   |         |         |         |   |         |         |         |   |         |         |          |   |         |         |          |   |         |         |         |   |         |         |         |   |         |         |          |                                                                                                                                                                                                                                                                                                                                                                                                                                                                                                                                                                                                                                                                                                                                                                                                                                                                                                                                                                                                                                                                                                                                                                                                                                                                                                                                                                                                                                                                                                                                                                                                                                                                                                                                                                                                       |         |         |         |         |         |         |         |         |         |         |         |         |          |          |          |          |          |          |          |          |          |          |          |          |          |          |          |          |          |          |          |          |          |          |          |          |          |          |          |          |          |          |          |          |          |          |          |          |          |          |          |          |          |          |          |          |          |          |          |          |          |          |          |          |          |          |          |          |          |          |          |          |          |          |          |          |          |          |          |          |          |
| H                               | 3.40717                                                                                                                                                                                                                                                                                                                                                                                                                                                                                                                                                                                                                                                                                                                                                                                                                                                                                                                                                                                                                                                                                                                                                                                                                                                                                                                                                                                                                                                                                                                                                                                                                                                                                                                                                                                                                                                                   | 1.16948                                                                            | 2.42960  |   |   |   |          |         |          |   |          |         |         |   |          |         |         |   |          |         |          |   |          |          |         |   |          |         |          |   |          |         |          |   |          |          |         |   |          |          |         |   |          |         |          |   |          |         |          |   |          |          |         |   |          |         |          |   |         |         |         |   |         |         |         |   |         |         |          |   |         |         |         |   |         |         |         |   |         |         |          |   |         |         |          |   |         |         |         |   |         |         |         |   |         |         |          |                                                                                                                                                                                                                                                                                                                                                                                                                                                                                                                                                                                                                                                                                                                                                                                                                                                                                                                                                                                                                                                                                                                                                                                                                                                                                                                                                                                                                                                                                                                                                                                                                                                                                                                                                                                                       |         |         |         |         |         |         |         |         |         |         |         |         |          |          |          |          |          |          |          |          |          |          |          |          |          |          |          |          |          |          |          |          |          |          |          |          |          |          |          |          |          |          |          |          |          |          |          |          |          |          |          |          |          |          |          |          |          |          |          |          |          |          |          |          |          |          |          |          |          |          |          |          |          |          |          |          |          |          |          |          |          |
| H                               | 3.86928                                                                                                                                                                                                                                                                                                                                                                                                                                                                                                                                                                                                                                                                                                                                                                                                                                                                                                                                                                                                                                                                                                                                                                                                                                                                                                                                                                                                                                                                                                                                                                                                                                                                                                                                                                                                                                                                   | 2.27642                                                                            | -1.69672 |   |   |   |          |         |          |   |          |         |         |   |          |         |         |   |          |         |          |   |          |          |         |   |          |         |          |   |          |         |          |   |          |          |         |   |          |          |         |   |          |         |          |   |          |         |          |   |          |          |         |   |          |         |          |   |         |         |         |   |         |         |         |   |         |         |          |   |         |         |         |   |         |         |         |   |         |         |          |   |         |         |          |   |         |         |         |   |         |         |         |   |         |         |          |                                                                                                                                                                                                                                                                                                                                                                                                                                                                                                                                                                                                                                                                                                                                                                                                                                                                                                                                                                                                                                                                                                                                                                                                                                                                                                                                                                                                                                                                                                                                                                                                                                                                                                                                                                                                       |         |         |         |         |         |         |         |         |         |         |         |         |          |          |          |          |          |          |          |          |          |          |          |          |          |          |          |          |          |          |          |          |          |          |          |          |          |          |          |          |          |          |          |          |          |          |          |          |          |          |          |          |          |          |          |          |          |          |          |          |          |          |          |          |          |          |          |          |          |          |          |          |          |          |          |          |          |          |          |          |          |
| 16.6981                         | 24.4283                                                                                                                                                                                                                                                                                                                                                                                                                                                                                                                                                                                                                                                                                                                                                                                                                                                                                                                                                                                                                                                                                                                                                                                                                                                                                                                                                                                                                                                                                                                                                                                                                                                                                                                                                                                                                                                                   | 27.3806                                                                            |          |   |   |   |          |         |          |   |          |         |         |   |          |         |         |   |          |         |          |   |          |          |         |   |          |         |          |   |          |         |          |   |          |          |         |   |          |          |         |   |          |         |          |   |          |         |          |   |          |          |         |   |          |         |          |   |         |         |         |   |         |         |         |   |         |         |          |   |         |         |         |   |         |         |         |   |         |         |          |   |         |         |          |   |         |         |         |   |         |         |         |   |         |         |          |                                                                                                                                                                                                                                                                                                                                                                                                                                                                                                                                                                                                                                                                                                                                                                                                                                                                                                                                                                                                                                                                                                                                                                                                                                                                                                                                                                                                                                                                                                                                                                                                                                                                                                                                                                                                       |         |         |         |         |         |         |         |         |         |         |         |         |          |          |          |          |          |          |          |          |          |          |          |          |          |          |          |          |          |          |          |          |          |          |          |          |          |          |          |          |          |          |          |          |          |          |          |          |          |          |          |          |          |          |          |          |          |          |          |          |          |          |          |          |          |          |          |          |          |          |          |          |          |          |          |          |          |          |          |          |          |
| 33.0649                         | 41.4118                                                                                                                                                                                                                                                                                                                                                                                                                                                                                                                                                                                                                                                                                                                                                                                                                                                                                                                                                                                                                                                                                                                                                                                                                                                                                                                                                                                                                                                                                                                                                                                                                                                                                                                                                                                                                                                                   | 45.5332                                                                            |          |   |   |   |          |         |          |   |          |         |         |   |          |         |         |   |          |         |          |   |          |          |         |   |          |         |          |   |          |         |          |   |          |          |         |   |          |          |         |   |          |         |          |   |          |         |          |   |          |          |         |   |          |         |          |   |         |         |         |   |         |         |         |   |         |         |          |   |         |         |         |   |         |         |         |   |         |         |          |   |         |         |          |   |         |         |         |   |         |         |         |   |         |         |          |                                                                                                                                                                                                                                                                                                                                                                                                                                                                                                                                                                                                                                                                                                                                                                                                                                                                                                                                                                                                                                                                                                                                                                                                                                                                                                                                                                                                                                                                                                                                                                                                                                                                                                                                                                                                       |         |         |         |         |         |         |         |         |         |         |         |         |          |          |          |          |          |          |          |          |          |          |          |          |          |          |          |          |          |          |          |          |          |          |          |          |          |          |          |          |          |          |          |          |          |          |          |          |          |          |          |          |          |          |          |          |          |          |          |          |          |          |          |          |          |          |          |          |          |          |          |          |          |          |          |          |          |          |          |          |          |
| 52.4172                         | 55.0044                                                                                                                                                                                                                                                                                                                                                                                                                                                                                                                                                                                                                                                                                                                                                                                                                                                                                                                                                                                                                                                                                                                                                                                                                                                                                                                                                                                                                                                                                                                                                                                                                                                                                                                                                                                                                                                                   | 66.9501                                                                            |          |   |   |   |          |         |          |   |          |         |         |   |          |         |         |   |          |         |          |   |          |          |         |   |          |         |          |   |          |         |          |   |          |          |         |   |          |          |         |   |          |         |          |   |          |         |          |   |          |          |         |   |          |         |          |   |         |         |         |   |         |         |         |   |         |         |          |   |         |         |         |   |         |         |         |   |         |         |          |   |         |         |          |   |         |         |         |   |         |         |         |   |         |         |          |                                                                                                                                                                                                                                                                                                                                                                                                                                                                                                                                                                                                                                                                                                                                                                                                                                                                                                                                                                                                                                                                                                                                                                                                                                                                                                                                                                                                                                                                                                                                                                                                                                                                                                                                                                                                       |         |         |         |         |         |         |         |         |         |         |         |         |          |          |          |          |          |          |          |          |          |          |          |          |          |          |          |          |          |          |          |          |          |          |          |          |          |          |          |          |          |          |          |          |          |          |          |          |          |          |          |          |          |          |          |          |          |          |          |          |          |          |          |          |          |          |          |          |          |          |          |          |          |          |          |          |          |          |          |          |          |
| 75.6046                         | 89.8118                                                                                                                                                                                                                                                                                                                                                                                                                                                                                                                                                                                                                                                                                                                                                                                                                                                                                                                                                                                                                                                                                                                                                                                                                                                                                                                                                                                                                                                                                                                                                                                                                                                                                                                                                                                                                                                                   | 91.9969                                                                            |          |   |   |   |          |         |          |   |          |         |         |   |          |         |         |   |          |         |          |   |          |          |         |   |          |         |          |   |          |         |          |   |          |          |         |   |          |          |         |   |          |         |          |   |          |         |          |   |          |          |         |   |          |         |          |   |         |         |         |   |         |         |         |   |         |         |          |   |         |         |         |   |         |         |         |   |         |         |          |   |         |         |          |   |         |         |         |   |         |         |         |   |         |         |          |                                                                                                                                                                                                                                                                                                                                                                                                                                                                                                                                                                                                                                                                                                                                                                                                                                                                                                                                                                                                                                                                                                                                                                                                                                                                                                                                                                                                                                                                                                                                                                                                                                                                                                                                                                                                       |         |         |         |         |         |         |         |         |         |         |         |         |          |          |          |          |          |          |          |          |          |          |          |          |          |          |          |          |          |          |          |          |          |          |          |          |          |          |          |          |          |          |          |          |          |          |          |          |          |          |          |          |          |          |          |          |          |          |          |          |          |          |          |          |          |          |          |          |          |          |          |          |          |          |          |          |          |          |          |          |          |
| 100.0517                        | 102.7922                                                                                                                                                                                                                                                                                                                                                                                                                                                                                                                                                                                                                                                                                                                                                                                                                                                                                                                                                                                                                                                                                                                                                                                                                                                                                                                                                                                                                                                                                                                                                                                                                                                                                                                                                                                                                                                                  | 120.0549                                                                           |          |   |   |   |          |         |          |   |          |         |         |   |          |         |         |   |          |         |          |   |          |          |         |   |          |         |          |   |          |         |          |   |          |          |         |   |          |          |         |   |          |         |          |   |          |         |          |   |          |          |         |   |          |         |          |   |         |         |         |   |         |         |         |   |         |         |          |   |         |         |         |   |         |         |         |   |         |         |          |   |         |         |          |   |         |         |         |   |         |         |         |   |         |         |          |                                                                                                                                                                                                                                                                                                                                                                                                                                                                                                                                                                                                                                                                                                                                                                                                                                                                                                                                                                                                                                                                                                                                                                                                                                                                                                                                                                                                                                                                                                                                                                                                                                                                                                                                                                                                       |         |         |         |         |         |         |         |         |         |         |         |         |          |          |          |          |          |          |          |          |          |          |          |          |          |          |          |          |          |          |          |          |          |          |          |          |          |          |          |          |          |          |          |          |          |          |          |          |          |          |          |          |          |          |          |          |          |          |          |          |          |          |          |          |          |          |          |          |          |          |          |          |          |          |          |          |          |          |          |          |          |
| 136.8538                        | 152.8329                                                                                                                                                                                                                                                                                                                                                                                                                                                                                                                                                                                                                                                                                                                                                                                                                                                                                                                                                                                                                                                                                                                                                                                                                                                                                                                                                                                                                                                                                                                                                                                                                                                                                                                                                                                                                                                                  | 165.3827                                                                           |          |   |   |   |          |         |          |   |          |         |         |   |          |         |         |   |          |         |          |   |          |          |         |   |          |         |          |   |          |         |          |   |          |          |         |   |          |          |         |   |          |         |          |   |          |         |          |   |          |          |         |   |          |         |          |   |         |         |         |   |         |         |         |   |         |         |          |   |         |         |         |   |         |         |         |   |         |         |          |   |         |         |          |   |         |         |         |   |         |         |         |   |         |         |          |                                                                                                                                                                                                                                                                                                                                                                                                                                                                                                                                                                                                                                                                                                                                                                                                                                                                                                                                                                                                                                                                                                                                                                                                                                                                                                                                                                                                                                                                                                                                                                                                                                                                                                                                                                                                       |         |         |         |         |         |         |         |         |         |         |         |         |          |          |          |          |          |          |          |          |          |          |          |          |          |          |          |          |          |          |          |          |          |          |          |          |          |          |          |          |          |          |          |          |          |          |          |          |          |          |          |          |          |          |          |          |          |          |          |          |          |          |          |          |          |          |          |          |          |          |          |          |          |          |          |          |          |          |          |          |          |
| 179.9798                        | 207.4949                                                                                                                                                                                                                                                                                                                                                                                                                                                                                                                                                                                                                                                                                                                                                                                                                                                                                                                                                                                                                                                                                                                                                                                                                                                                                                                                                                                                                                                                                                                                                                                                                                                                                                                                                                                                                                                                  | 223.5079                                                                           |          |   |   |   |          |         |          |   |          |         |         |   |          |         |         |   |          |         |          |   |          |          |         |   |          |         |          |   |          |         |          |   |          |          |         |   |          |          |         |   |          |         |          |   |          |         |          |   |          |          |         |   |          |         |          |   |         |         |         |   |         |         |         |   |         |         |          |   |         |         |         |   |         |         |         |   |         |         |          |   |         |         |          |   |         |         |         |   |         |         |         |   |         |         |          |                                                                                                                                                                                                                                                                                                                                                                                                                                                                                                                                                                                                                                                                                                                                                                                                                                                                                                                                                                                                                                                                                                                                                                                                                                                                                                                                                                                                                                                                                                                                                                                                                                                                                                                                                                                                       |         |         |         |         |         |         |         |         |         |         |         |         |          |          |          |          |          |          |          |          |          |          |          |          |          |          |          |          |          |          |          |          |          |          |          |          |          |          |          |          |          |          |          |          |          |          |          |          |          |          |          |          |          |          |          |          |          |          |          |          |          |          |          |          |          |          |          |          |          |          |          |          |          |          |          |          |          |          |          |          |          |
| 232.0909                        | 235.2116                                                                                                                                                                                                                                                                                                                                                                                                                                                                                                                                                                                                                                                                                                                                                                                                                                                                                                                                                                                                                                                                                                                                                                                                                                                                                                                                                                                                                                                                                                                                                                                                                                                                                                                                                                                                                                                                  | 241.5448                                                                           |          |   |   |   |          |         |          |   |          |         |         |   |          |         |         |   |          |         |          |   |          |          |         |   |          |         |          |   |          |         |          |   |          |          |         |   |          |          |         |   |          |         |          |   |          |         |          |   |          |          |         |   |          |         |          |   |         |         |         |   |         |         |         |   |         |         |          |   |         |         |         |   |         |         |         |   |         |         |          |   |         |         |          |   |         |         |         |   |         |         |         |   |         |         |          |                                                                                                                                                                                                                                                                                                                                                                                                                                                                                                                                                                                                                                                                                                                                                                                                                                                                                                                                                                                                                                                                                                                                                                                                                                                                                                                                                                                                                                                                                                                                                                                                                                                                                                                                                                                                       |         |         |         |         |         |         |         |         |         |         |         |         |          |          |          |          |          |          |          |          |          |          |          |          |          |          |          |          |          |          |          |          |          |          |          |          |          |          |          |          |          |          |          |          |          |          |          |          |          |          |          |          |          |          |          |          |          |          |          |          |          |          |          |          |          |          |          |          |          |          |          |          |          |          |          |          |          |          |          |          |          |
| 249.5086                        | 257.4604                                                                                                                                                                                                                                                                                                                                                                                                                                                                                                                                                                                                                                                                                                                                                                                                                                                                                                                                                                                                                                                                                                                                                                                                                                                                                                                                                                                                                                                                                                                                                                                                                                                                                                                                                                                                                                                                  | 265.2142                                                                           |          |   |   |   |          |         |          |   |          |         |         |   |          |         |         |   |          |         |          |   |          |          |         |   |          |         |          |   |          |         |          |   |          |          |         |   |          |          |         |   |          |         |          |   |          |         |          |   |          |          |         |   |          |         |          |   |         |         |         |   |         |         |         |   |         |         |          |   |         |         |         |   |         |         |         |   |         |         |          |   |         |         |          |   |         |         |         |   |         |         |         |   |         |         |          |                                                                                                                                                                                                                                                                                                                                                                                                                                                                                                                                                                                                                                                                                                                                                                                                                                                                                                                                                                                                                                                                                                                                                                                                                                                                                                                                                                                                                                                                                                                                                                                                                                                                                                                                                                                                       |         |         |         |         |         |         |         |         |         |         |         |         |          |          |          |          |          |          |          |          |          |          |          |          |          |          |          |          |          |          |          |          |          |          |          |          |          |          |          |          |          |          |          |          |          |          |          |          |          |          |          |          |          |          |          |          |          |          |          |          |          |          |          |          |          |          |          |          |          |          |          |          |          |          |          |          |          |          |          |          |          |
| 288.5523                        | 293.5324                                                                                                                                                                                                                                                                                                                                                                                                                                                                                                                                                                                                                                                                                                                                                                                                                                                                                                                                                                                                                                                                                                                                                                                                                                                                                                                                                                                                                                                                                                                                                                                                                                                                                                                                                                                                                                                                  | 297.3585                                                                           |          |   |   |   |          |         |          |   |          |         |         |   |          |         |         |   |          |         |          |   |          |          |         |   |          |         |          |   |          |         |          |   |          |          |         |   |          |          |         |   |          |         |          |   |          |         |          |   |          |          |         |   |          |         |          |   |         |         |         |   |         |         |         |   |         |         |          |   |         |         |         |   |         |         |         |   |         |         |          |   |         |         |          |   |         |         |         |   |         |         |         |   |         |         |          |                                                                                                                                                                                                                                                                                                                                                                                                                                                                                                                                                                                                                                                                                                                                                                                                                                                                                                                                                                                                                                                                                                                                                                                                                                                                                                                                                                                                                                                                                                                                                                                                                                                                                                                                                                                                       |         |         |         |         |         |         |         |         |         |         |         |         |          |          |          |          |          |          |          |          |          |          |          |          |          |          |          |          |          |          |          |          |          |          |          |          |          |          |          |          |          |          |          |          |          |          |          |          |          |          |          |          |          |          |          |          |          |          |          |          |          |          |          |          |          |          |          |          |          |          |          |          |          |          |          |          |          |          |          |          |          |
| 319.2358                        | 340.3852                                                                                                                                                                                                                                                                                                                                                                                                                                                                                                                                                                                                                                                                                                                                                                                                                                                                                                                                                                                                                                                                                                                                                                                                                                                                                                                                                                                                                                                                                                                                                                                                                                                                                                                                                                                                                                                                  | 344.2942                                                                           |          |   |   |   |          |         |          |   |          |         |         |   |          |         |         |   |          |         |          |   |          |          |         |   |          |         |          |   |          |         |          |   |          |          |         |   |          |          |         |   |          |         |          |   |          |         |          |   |          |          |         |   |          |         |          |   |         |         |         |   |         |         |         |   |         |         |          |   |         |         |         |   |         |         |         |   |         |         |          |   |         |         |          |   |         |         |         |   |         |         |         |   |         |         |          |                                                                                                                                                                                                                                                                                                                                                                                                                                                                                                                                                                                                                                                                                                                                                                                                                                                                                                                                                                                                                                                                                                                                                                                                                                                                                                                                                                                                                                                                                                                                                                                                                                                                                                                                                                                                       |         |         |         |         |         |         |         |         |         |         |         |         |          |          |          |          |          |          |          |          |          |          |          |          |          |          |          |          |          |          |          |          |          |          |          |          |          |          |          |          |          |          |          |          |          |          |          |          |          |          |          |          |          |          |          |          |          |          |          |          |          |          |          |          |          |          |          |          |          |          |          |          |          |          |          |          |          |          |          |          |          |
| 365.6314                        | 371.5490                                                                                                                                                                                                                                                                                                                                                                                                                                                                                                                                                                                                                                                                                                                                                                                                                                                                                                                                                                                                                                                                                                                                                                                                                                                                                                                                                                                                                                                                                                                                                                                                                                                                                                                                                                                                                                                                  | 381.4601                                                                           |          |   |   |   |          |         |          |   |          |         |         |   |          |         |         |   |          |         |          |   |          |          |         |   |          |         |          |   |          |         |          |   |          |          |         |   |          |          |         |   |          |         |          |   |          |         |          |   |          |          |         |   |          |         |          |   |         |         |         |   |         |         |         |   |         |         |          |   |         |         |         |   |         |         |         |   |         |         |          |   |         |         |          |   |         |         |         |   |         |         |         |   |         |         |          |                                                                                                                                                                                                                                                                                                                                                                                                                                                                                                                                                                                                                                                                                                                                                                                                                                                                                                                                                                                                                                                                                                                                                                                                                                                                                                                                                                                                                                                                                                                                                                                                                                                                                                                                                                                                       |         |         |         |         |         |         |         |         |         |         |         |         |          |          |          |          |          |          |          |          |          |          |          |          |          |          |          |          |          |          |          |          |          |          |          |          |          |          |          |          |          |          |          |          |          |          |          |          |          |          |          |          |          |          |          |          |          |          |          |          |          |          |          |          |          |          |          |          |          |          |          |          |          |          |          |          |          |          |          |          |          |
| 390.5941                        | 404.4503                                                                                                                                                                                                                                                                                                                                                                                                                                                                                                                                                                                                                                                                                                                                                                                                                                                                                                                                                                                                                                                                                                                                                                                                                                                                                                                                                                                                                                                                                                                                                                                                                                                                                                                                                                                                                                                                  | 416.2061                                                                           |          |   |   |   |          |         |          |   |          |         |         |   |          |         |         |   |          |         |          |   |          |          |         |   |          |         |          |   |          |         |          |   |          |          |         |   |          |          |         |   |          |         |          |   |          |         |          |   |          |          |         |   |          |         |          |   |         |         |         |   |         |         |         |   |         |         |          |   |         |         |         |   |         |         |         |   |         |         |          |   |         |         |          |   |         |         |         |   |         |         |         |   |         |         |          |                                                                                                                                                                                                                                                                                                                                                                                                                                                                                                                                                                                                                                                                                                                                                                                                                                                                                                                                                                                                                                                                                                                                                                                                                                                                                                                                                                                                                                                                                                                                                                                                                                                                                                                                                                                                       |         |         |         |         |         |         |         |         |         |         |         |         |          |          |          |          |          |          |          |          |          |          |          |          |          |          |          |          |          |          |          |          |          |          |          |          |          |          |          |          |          |          |          |          |          |          |          |          |          |          |          |          |          |          |          |          |          |          |          |          |          |          |          |          |          |          |          |          |          |          |          |          |          |          |          |          |          |          |          |          |          |
| 426.0088                        | 435.3637                                                                                                                                                                                                                                                                                                                                                                                                                                                                                                                                                                                                                                                                                                                                                                                                                                                                                                                                                                                                                                                                                                                                                                                                                                                                                                                                                                                                                                                                                                                                                                                                                                                                                                                                                                                                                                                                  | 443.2499                                                                           |          |   |   |   |          |         |          |   |          |         |         |   |          |         |         |   |          |         |          |   |          |          |         |   |          |         |          |   |          |         |          |   |          |          |         |   |          |          |         |   |          |         |          |   |          |         |          |   |          |          |         |   |          |         |          |   |         |         |         |   |         |         |         |   |         |         |          |   |         |         |         |   |         |         |         |   |         |         |          |   |         |         |          |   |         |         |         |   |         |         |         |   |         |         |          |                                                                                                                                                                                                                                                                                                                                                                                                                                                                                                                                                                                                                                                                                                                                                                                                                                                                                                                                                                                                                                                                                                                                                                                                                                                                                                                                                                                                                                                                                                                                                                                                                                                                                                                                                                                                       |         |         |         |         |         |         |         |         |         |         |         |         |          |          |          |          |          |          |          |          |          |          |          |          |          |          |          |          |          |          |          |          |          |          |          |          |          |          |          |          |          |          |          |          |          |          |          |          |          |          |          |          |          |          |          |          |          |          |          |          |          |          |          |          |          |          |          |          |          |          |          |          |          |          |          |          |          |          |          |          |          |
| 454.7636                        | 467.4870                                                                                                                                                                                                                                                                                                                                                                                                                                                                                                                                                                                                                                                                                                                                                                                                                                                                                                                                                                                                                                                                                                                                                                                                                                                                                                                                                                                                                                                                                                                                                                                                                                                                                                                                                                                                                                                                  | 470.9229                                                                           |          |   |   |   |          |         |          |   |          |         |         |   |          |         |         |   |          |         |          |   |          |          |         |   |          |         |          |   |          |         |          |   |          |          |         |   |          |          |         |   |          |         |          |   |          |         |          |   |          |          |         |   |          |         |          |   |         |         |         |   |         |         |         |   |         |         |          |   |         |         |         |   |         |         |         |   |         |         |          |   |         |         |          |   |         |         |         |   |         |         |         |   |         |         |          |                                                                                                                                                                                                                                                                                                                                                                                                                                                                                                                                                                                                                                                                                                                                                                                                                                                                                                                                                                                                                                                                                                                                                                                                                                                                                                                                                                                                                                                                                                                                                                                                                                                                                                                                                                                                       |         |         |         |         |         |         |         |         |         |         |         |         |          |          |          |          |          |          |          |          |          |          |          |          |          |          |          |          |          |          |          |          |          |          |          |          |          |          |          |          |          |          |          |          |          |          |          |          |          |          |          |          |          |          |          |          |          |          |          |          |          |          |          |          |          |          |          |          |          |          |          |          |          |          |          |          |          |          |          |          |          |
| 478.0321                        | 482.1971                                                                                                                                                                                                                                                                                                                                                                                                                                                                                                                                                                                                                                                                                                                                                                                                                                                                                                                                                                                                                                                                                                                                                                                                                                                                                                                                                                                                                                                                                                                                                                                                                                                                                                                                                                                                                                                                  | 487.2246                                                                           |          |   |   |   |          |         |          |   |          |         |         |   |          |         |         |   |          |         |          |   |          |          |         |   |          |         |          |   |          |         |          |   |          |          |         |   |          |          |         |   |          |         |          |   |          |         |          |   |          |          |         |   |          |         |          |   |         |         |         |   |         |         |         |   |         |         |          |   |         |         |         |   |         |         |         |   |         |         |          |   |         |         |          |   |         |         |         |   |         |         |         |   |         |         |          |                                                                                                                                                                                                                                                                                                                                                                                                                                                                                                                                                                                                                                                                                                                                                                                                                                                                                                                                                                                                                                                                                                                                                                                                                                                                                                                                                                                                                                                                                                                                                                                                                                                                                                                                                                                                       |         |         |         |         |         |         |         |         |         |         |         |         |          |          |          |          |          |          |          |          |          |          |          |          |          |          |          |          |          |          |          |          |          |          |          |          |          |          |          |          |          |          |          |          |          |          |          |          |          |          |          |          |          |          |          |          |          |          |          |          |          |          |          |          |          |          |          |          |          |          |          |          |          |          |          |          |          |          |          |          |          |
| 492.6701                        | 529.6536                                                                                                                                                                                                                                                                                                                                                                                                                                                                                                                                                                                                                                                                                                                                                                                                                                                                                                                                                                                                                                                                                                                                                                                                                                                                                                                                                                                                                                                                                                                                                                                                                                                                                                                                                                                                                                                                  | 539.6676                                                                           |          |   |   |   |          |         |          |   |          |         |         |   |          |         |         |   |          |         |          |   |          |          |         |   |          |         |          |   |          |         |          |   |          |          |         |   |          |          |         |   |          |         |          |   |          |         |          |   |          |          |         |   |          |         |          |   |         |         |         |   |         |         |         |   |         |         |          |   |         |         |         |   |         |         |         |   |         |         |          |   |         |         |          |   |         |         |         |   |         |         |         |   |         |         |          |                                                                                                                                                                                                                                                                                                                                                                                                                                                                                                                                                                                                                                                                                                                                                                                                                                                                                                                                                                                                                                                                                                                                                                                                                                                                                                                                                                                                                                                                                                                                                                                                                                                                                                                                                                                                       |         |         |         |         |         |         |         |         |         |         |         |         |          |          |          |          |          |          |          |          |          |          |          |          |          |          |          |          |          |          |          |          |          |          |          |          |          |          |          |          |          |          |          |          |          |          |          |          |          |          |          |          |          |          |          |          |          |          |          |          |          |          |          |          |          |          |          |          |          |          |          |          |          |          |          |          |          |          |          |          |          |
| 545.4279                        | 552.3079                                                                                                                                                                                                                                                                                                                                                                                                                                                                                                                                                                                                                                                                                                                                                                                                                                                                                                                                                                                                                                                                                                                                                                                                                                                                                                                                                                                                                                                                                                                                                                                                                                                                                                                                                                                                                                                                  | 560.5963                                                                           |          |   |   |   |          |         |          |   |          |         |         |   |          |         |         |   |          |         |          |   |          |          |         |   |          |         |          |   |          |         |          |   |          |          |         |   |          |          |         |   |          |         |          |   |          |         |          |   |          |          |         |   |          |         |          |   |         |         |         |   |         |         |         |   |         |         |          |   |         |         |         |   |         |         |         |   |         |         |          |   |         |         |          |   |         |         |         |   |         |         |         |   |         |         |          |                                                                                                                                                                                                                                                                                                                                                                                                                                                                                                                                                                                                                                                                                                                                                                                                                                                                                                                                                                                                                                                                                                                                                                                                                                                                                                                                                                                                                                                                                                                                                                                                                                                                                                                                                                                                       |         |         |         |         |         |         |         |         |         |         |         |         |          |          |          |          |          |          |          |          |          |          |          |          |          |          |          |          |          |          |          |          |          |          |          |          |          |          |          |          |          |          |          |          |          |          |          |          |          |          |          |          |          |          |          |          |          |          |          |          |          |          |          |          |          |          |          |          |          |          |          |          |          |          |          |          |          |          |          |          |          |
| 564.8906                        | 574.1963                                                                                                                                                                                                                                                                                                                                                                                                                                                                                                                                                                                                                                                                                                                                                                                                                                                                                                                                                                                                                                                                                                                                                                                                                                                                                                                                                                                                                                                                                                                                                                                                                                                                                                                                                                                                                                                                  | 582.9631                                                                           |          |   |   |   |          |         |          |   |          |         |         |   |          |         |         |   |          |         |          |   |          |          |         |   |          |         |          |   |          |         |          |   |          |          |         |   |          |          |         |   |          |         |          |   |          |         |          |   |          |          |         |   |          |         |          |   |         |         |         |   |         |         |         |   |         |         |          |   |         |         |         |   |         |         |         |   |         |         |          |   |         |         |          |   |         |         |         |   |         |         |         |   |         |         |          |                                                                                                                                                                                                                                                                                                                                                                                                                                                                                                                                                                                                                                                                                                                                                                                                                                                                                                                                                                                                                                                                                                                                                                                                                                                                                                                                                                                                                                                                                                                                                                                                                                                                                                                                                                                                       |         |         |         |         |         |         |         |         |         |         |         |         |          |          |          |          |          |          |          |          |          |          |          |          |          |          |          |          |          |          |          |          |          |          |          |          |          |          |          |          |          |          |          |          |          |          |          |          |          |          |          |          |          |          |          |          |          |          |          |          |          |          |          |          |          |          |          |          |          |          |          |          |          |          |          |          |          |          |          |          |          |
| 592.4989                        | 599.8486                                                                                                                                                                                                                                                                                                                                                                                                                                                                                                                                                                                                                                                                                                                                                                                                                                                                                                                                                                                                                                                                                                                                                                                                                                                                                                                                                                                                                                                                                                                                                                                                                                                                                                                                                                                                                                                                  | 616.3173                                                                           |          |   |   |   |          |         |          |   |          |         |         |   |          |         |         |   |          |         |          |   |          |          |         |   |          |         |          |   |          |         |          |   |          |          |         |   |          |          |         |   |          |         |          |   |          |         |          |   |          |          |         |   |          |         |          |   |         |         |         |   |         |         |         |   |         |         |          |   |         |         |         |   |         |         |         |   |         |         |          |   |         |         |          |   |         |         |         |   |         |         |         |   |         |         |          |                                                                                                                                                                                                                                                                                                                                                                                                                                                                                                                                                                                                                                                                                                                                                                                                                                                                                                                                                                                                                                                                                                                                                                                                                                                                                                                                                                                                                                                                                                                                                                                                                                                                                                                                                                                                       |         |         |         |         |         |         |         |         |         |         |         |         |          |          |          |          |          |          |          |          |          |          |          |          |          |          |          |          |          |          |          |          |          |          |          |          |          |          |          |          |          |          |          |          |          |          |          |          |          |          |          |          |          |          |          |          |          |          |          |          |          |          |          |          |          |          |          |          |          |          |          |          |          |          |          |          |          |          |          |          |          |
| 624.0227                        | 629.7763                                                                                                                                                                                                                                                                                                                                                                                                                                                                                                                                                                                                                                                                                                                                                                                                                                                                                                                                                                                                                                                                                                                                                                                                                                                                                                                                                                                                                                                                                                                                                                                                                                                                                                                                                                                                                                                                  | 649.9554                                                                           |          |   |   |   |          |         |          |   |          |         |         |   |          |         |         |   |          |         |          |   |          |          |         |   |          |         |          |   |          |         |          |   |          |          |         |   |          |          |         |   |          |         |          |   |          |         |          |   |          |          |         |   |          |         |          |   |         |         |         |   |         |         |         |   |         |         |          |   |         |         |         |   |         |         |         |   |         |         |          |   |         |         |          |   |         |         |         |   |         |         |         |   |         |         |          |                                                                                                                                                                                                                                                                                                                                                                                                                                                                                                                                                                                                                                                                                                                                                                                                                                                                                                                                                                                                                                                                                                                                                                                                                                                                                                                                                                                                                                                                                                                                                                                                                                                                                                                                                                                                       |         |         |         |         |         |         |         |         |         |         |         |         |          |          |          |          |          |          |          |          |          |          |          |          |          |          |          |          |          |          |          |          |          |          |          |          |          |          |          |          |          |          |          |          |          |          |          |          |          |          |          |          |          |          |          |          |          |          |          |          |          |          |          |          |          |          |          |          |          |          |          |          |          |          |          |          |          |          |          |          |          |
| 655.0886                        | 674.9909                                                                                                                                                                                                                                                                                                                                                                                                                                                                                                                                                                                                                                                                                                                                                                                                                                                                                                                                                                                                                                                                                                                                                                                                                                                                                                                                                                                                                                                                                                                                                                                                                                                                                                                                                                                                                                                                  | 680.3601                                                                           |          |   |   |   |          |         |          |   |          |         |         |   |          |         |         |   |          |         |          |   |          |          |         |   |          |         |          |   |          |         |          |   |          |          |         |   |          |          |         |   |          |         |          |   |          |         |          |   |          |          |         |   |          |         |          |   |         |         |         |   |         |         |         |   |         |         |          |   |         |         |         |   |         |         |         |   |         |         |          |   |         |         |          |   |         |         |         |   |         |         |         |   |         |         |          |                                                                                                                                                                                                                                                                                                                                                                                                                                                                                                                                                                                                                                                                                                                                                                                                                                                                                                                                                                                                                                                                                                                                                                                                                                                                                                                                                                                                                                                                                                                                                                                                                                                                                                                                                                                                       |         |         |         |         |         |         |         |         |         |         |         |         |          |          |          |          |          |          |          |          |          |          |          |          |          |          |          |          |          |          |          |          |          |          |          |          |          |          |          |          |          |          |          |          |          |          |          |          |          |          |          |          |          |          |          |          |          |          |          |          |          |          |          |          |          |          |          |          |          |          |          |          |          |          |          |          |          |          |          |          |          |
| 693.1212                        | 699.2717                                                                                                                                                                                                                                                                                                                                                                                                                                                                                                                                                                                                                                                                                                                                                                                                                                                                                                                                                                                                                                                                                                                                                                                                                                                                                                                                                                                                                                                                                                                                                                                                                                                                                                                                                                                                                                                                  | 706.9245                                                                           |          |   |   |   |          |         |          |   |          |         |         |   |          |         |         |   |          |         |          |   |          |          |         |   |          |         |          |   |          |         |          |   |          |          |         |   |          |          |         |   |          |         |          |   |          |         |          |   |          |          |         |   |          |         |          |   |         |         |         |   |         |         |         |   |         |         |          |   |         |         |         |   |         |         |         |   |         |         |          |   |         |         |          |   |         |         |         |   |         |         |         |   |         |         |          |                                                                                                                                                                                                                                                                                                                                                                                                                                                                                                                                                                                                                                                                                                                                                                                                                                                                                                                                                                                                                                                                                                                                                                                                                                                                                                                                                                                                                                                                                                                                                                                                                                                                                                                                                                                                       |         |         |         |         |         |         |         |         |         |         |         |         |          |          |          |          |          |          |          |          |          |          |          |          |          |          |          |          |          |          |          |          |          |          |          |          |          |          |          |          |          |          |          |          |          |          |          |          |          |          |          |          |          |          |          |          |          |          |          |          |          |          |          |          |          |          |          |          |          |          |          |          |          |          |          |          |          |          |          |          |          |
| 712.6924                        | 715.5989                                                                                                                                                                                                                                                                                                                                                                                                                                                                                                                                                                                                                                                                                                                                                                                                                                                                                                                                                                                                                                                                                                                                                                                                                                                                                                                                                                                                                                                                                                                                                                                                                                                                                                                                                                                                                                                                  | 717.8017                                                                           |          |   |   |   |          |         |          |   |          |         |         |   |          |         |         |   |          |         |          |   |          |          |         |   |          |         |          |   |          |         |          |   |          |          |         |   |          |          |         |   |          |         |          |   |          |         |          |   |          |          |         |   |          |         |          |   |         |         |         |   |         |         |         |   |         |         |          |   |         |         |         |   |         |         |         |   |         |         |          |   |         |         |          |   |         |         |         |   |         |         |         |   |         |         |          |                                                                                                                                                                                                                                                                                                                                                                                                                                                                                                                                                                                                                                                                                                                                                                                                                                                                                                                                                                                                                                                                                                                                                                                                                                                                                                                                                                                                                                                                                                                                                                                                                                                                                                                                                                                                       |         |         |         |         |         |         |         |         |         |         |         |         |          |          |          |          |          |          |          |          |          |          |          |          |          |          |          |          |          |          |          |          |          |          |          |          |          |          |          |          |          |          |          |          |          |          |          |          |          |          |          |          |          |          |          |          |          |          |          |          |          |          |          |          |          |          |          |          |          |          |          |          |          |          |          |          |          |          |          |          |          |
| 728.8363                        | 751.8030                                                                                                                                                                                                                                                                                                                                                                                                                                                                                                                                                                                                                                                                                                                                                                                                                                                                                                                                                                                                                                                                                                                                                                                                                                                                                                                                                                                                                                                                                                                                                                                                                                                                                                                                                                                                                                                                  | 756.2793                                                                           |          |   |   |   |          |         |          |   |          |         |         |   |          |         |         |   |          |         |          |   |          |          |         |   |          |         |          |   |          |         |          |   |          |          |         |   |          |          |         |   |          |         |          |   |          |         |          |   |          |          |         |   |          |         |          |   |         |         |         |   |         |         |         |   |         |         |          |   |         |         |         |   |         |         |         |   |         |         |          |   |         |         |          |   |         |         |         |   |         |         |         |   |         |         |          |                                                                                                                                                                                                                                                                                                                                                                                                                                                                                                                                                                                                                                                                                                                                                                                                                                                                                                                                                                                                                                                                                                                                                                                                                                                                                                                                                                                                                                                                                                                                                                                                                                                                                                                                                                                                       |         |         |         |         |         |         |         |         |         |         |         |         |          |          |          |          |          |          |          |          |          |          |          |          |          |          |          |          |          |          |          |          |          |          |          |          |          |          |          |          |          |          |          |          |          |          |          |          |          |          |          |          |          |          |          |          |          |          |          |          |          |          |          |          |          |          |          |          |          |          |          |          |          |          |          |          |          |          |          |          |          |
| 763.8595                        | 778.9907                                                                                                                                                                                                                                                                                                                                                                                                                                                                                                                                                                                                                                                                                                                                                                                                                                                                                                                                                                                                                                                                                                                                                                                                                                                                                                                                                                                                                                                                                                                                                                                                                                                                                                                                                                                                                                                                  | 779.5007                                                                           |          |   |   |   |          |         |          |   |          |         |         |   |          |         |         |   |          |         |          |   |          |          |         |   |          |         |          |   |          |         |          |   |          |          |         |   |          |          |         |   |          |         |          |   |          |         |          |   |          |          |         |   |          |         |          |   |         |         |         |   |         |         |         |   |         |         |          |   |         |         |         |   |         |         |         |   |         |         |          |   |         |         |          |   |         |         |         |   |         |         |         |   |         |         |          |                                                                                                                                                                                                                                                                                                                                                                                                                                                                                                                                                                                                                                                                                                                                                                                                                                                                                                                                                                                                                                                                                                                                                                                                                                                                                                                                                                                                                                                                                                                                                                                                                                                                                                                                                                                                       |         |         |         |         |         |         |         |         |         |         |         |         |          |          |          |          |          |          |          |          |          |          |          |          |          |          |          |          |          |          |          |          |          |          |          |          |          |          |          |          |          |          |          |          |          |          |          |          |          |          |          |          |          |          |          |          |          |          |          |          |          |          |          |          |          |          |          |          |          |          |          |          |          |          |          |          |          |          |          |          |          |
| 797.5079                        | 805.2352                                                                                                                                                                                                                                                                                                                                                                                                                                                                                                                                                                                                                                                                                                                                                                                                                                                                                                                                                                                                                                                                                                                                                                                                                                                                                                                                                                                                                                                                                                                                                                                                                                                                                                                                                                                                                                                                  | 817.5095                                                                           |          |   |   |   |          |         |          |   |          |         |         |   |          |         |         |   |          |         |          |   |          |          |         |   |          |         |          |   |          |         |          |   |          |          |         |   |          |          |         |   |          |         |          |   |          |         |          |   |          |          |         |   |          |         |          |   |         |         |         |   |         |         |         |   |         |         |          |   |         |         |         |   |         |         |         |   |         |         |          |   |         |         |          |   |         |         |         |   |         |         |         |   |         |         |          |                                                                                                                                                                                                                                                                                                                                                                                                                                                                                                                                                                                                                                                                                                                                                                                                                                                                                                                                                                                                                                                                                                                                                                                                                                                                                                                                                                                                                                                                                                                                                                                                                                                                                                                                                                                                       |         |         |         |         |         |         |         |         |         |         |         |         |          |          |          |          |          |          |          |          |          |          |          |          |          |          |          |          |          |          |          |          |          |          |          |          |          |          |          |          |          |          |          |          |          |          |          |          |          |          |          |          |          |          |          |          |          |          |          |          |          |          |          |          |          |          |          |          |          |          |          |          |          |          |          |          |          |          |          |          |          |



|    |          |          |          |           |           |           |
|----|----------|----------|----------|-----------|-----------|-----------|
| H  | 4.86928  | 1.72260  | 0.50506  | 823.4684  | 836.3652  | 844.4004  |
| Cs | 1.13863  | -1.78685 | -0.24190 | 845.0711  | 851.4940  | 853.8454  |
| C  | -2.47342 | 3.43093  | -0.00949 | 855.9754  | 862.3879  | 871.1245  |
| C  | -3.82339 | -1.41770 | -0.02924 | 872.8333  | 878.0433  | 908.8083  |
| C  | -5.04390 | 0.68674  | -0.04268 | 909.9656  | 913.1582  | 940.6026  |
| C  | -3.70087 | 2.84513  | -0.02388 | 942.0969  | 944.2023  | 949.8301  |
| H  | -2.37687 | 4.51148  | -0.00260 | 970.4657  | 989.1859  | 990.2950  |
| C  | -3.70086 | -2.84511 | -0.02396 | 991.3506  | 996.1339  | 1007.1116 |
| C  | -5.04390 | -0.68672 | -0.04268 | 1008.4663 | 1013.7525 | 1014.0830 |
| C  | -1.25756 | -2.64674 | 0.00047  | 1016.1024 | 1017.5251 | 1019.5129 |
| H  | -5.98116 | 1.23509  | -0.05313 | 1020.5027 | 1023.0524 | 1032.6696 |
| H  | -4.60015 | 3.45511  | -0.02958 | 1061.4265 | 1065.3131 | 1098.9901 |
| C  | -2.47341 | -3.43094 | -0.00962 | 1117.9493 | 1120.2566 | 1122.0819 |
| H  | -4.60014 | -3.45510 | -0.02964 | 1134.9156 | 1145.1623 | 1167.2844 |
| H  | -5.98117 | -1.23506 | -0.05312 | 1173.6205 | 1178.5113 | 1182.3669 |
| H  | -2.37687 | -4.51149 | -0.00276 | 1182.5199 | 1186.8752 | 1192.0287 |
| N  | -1.38780 | 1.30028  | -0.01186 | 1194.4447 | 1218.6118 | 1226.0003 |
| N  | -1.38782 | -1.30028 | -0.01191 | 1234.0357 | 1235.1119 | 1239.9113 |
| H  | 0.00022  | -0.00008 | 1.45530  | 1256.4551 | 1257.0075 | 1263.8926 |
| C  | -0.00001 | 3.27742  | 0.01504  | 1264.4577 | 1279.4234 | 1283.2040 |
| H  | -0.00000 | 4.36099  | 0.02340  | 1313.7050 | 1336.8756 | 1344.7907 |
| C  | -0.00000 | -3.27741 | 0.01489  | 1347.7220 | 1372.2262 | 1375.7736 |
| H  | 0.00001  | -4.36099 | 0.02318  | 1382.5717 | 1382.9361 | 1394.1544 |
|    |          |          |          | 1407.8809 | 1420.3893 | 1436.6180 |
|    |          |          |          | 1445.4072 | 1453.4512 | 1461.2259 |
|    |          |          |          | 1468.8378 | 1476.1727 | 1486.1987 |
|    |          |          |          | 1499.3668 | 1503.7291 | 1507.8286 |
|    |          |          |          | 1512.1156 | 1530.5706 | 1533.7211 |
|    |          |          |          | 1544.3718 | 1567.4206 | 1570.9843 |
|    |          |          |          | 1613.0014 | 1624.7257 | 1628.9945 |
|    |          |          |          | 1640.3854 | 1668.0682 | 1675.4645 |
|    |          |          |          | 1681.5500 | 1683.9139 | 1692.2339 |
|    |          |          |          | 1692.8744 | 1699.3571 | 1700.5231 |
|    |          |          |          | 1707.1523 | 1722.3080 | 3201.6284 |
|    |          |          |          | 3201.9391 | 3203.6681 | 3204.7901 |
|    |          |          |          | 3206.4715 | 3206.6489 | 3207.2261 |
|    |          |          |          | 3211.7550 | 3214.7372 | 3214.9270 |
|    |          |          |          | 3218.4289 | 3219.4635 | 3220.3857 |
|    |          |          |          | 3224.5697 | 3226.4997 | 3226.9641 |
|    |          |          |          | 3228.5330 | 3232.8356 | 3234.1647 |
|    |          |          |          | 3236.4831 | 3236.9005 | 3239.2984 |
|    |          |          |          | 3240.9731 | 3243.0252 | 3296.5530 |

### Statistical Thermodynamic Analysis

Temperature = 403.15 K

Pressure = 1 atm

Zero-point correction = 0.546626

Electronic Energy = -1955.74882591

Internal Energy (E) = -1955.13955491

Enthalpy (H) = -1955.13827791

Gibbs Free Energy (G) = -1955.31047191

Gibbs Free Energy of Solvation = -1955.37733413

| St. Point                      | General Structure                                                                 | Ball & Stick model                                                                 |           |
|--------------------------------|-----------------------------------------------------------------------------------|------------------------------------------------------------------------------------|-----------|
| <b>I4<sup>Hyd(spill)</sup></b> | 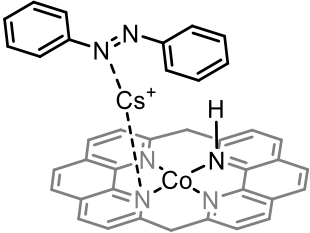 |  |           |
| <b>Cartesian coordinate</b>    |                                                                                   | <b>Frequencies</b>                                                                 |           |
| -----                          |                                                                                   |                                                                                    |           |
| Atoms                          | X                                                                                 | Y                                                                                  | Z         |
| -----                          |                                                                                   |                                                                                    |           |
|                                |                                                                                   |                                                                                    | 12.7580   |
|                                |                                                                                   |                                                                                    | 15.0972   |
|                                |                                                                                   |                                                                                    | 20.1212   |
|                                |                                                                                   |                                                                                    | 25.3914   |
|                                |                                                                                   |                                                                                    | 29.4230   |
|                                |                                                                                   |                                                                                    | 40.5219   |
|                                |                                                                                   |                                                                                    | 45.3640   |
|                                |                                                                                   |                                                                                    | 52.7118   |
|                                |                                                                                   |                                                                                    | 62.4395   |
|                                |                                                                                   |                                                                                    | 66.4686   |
|                                |                                                                                   |                                                                                    | 69.6727   |
|                                |                                                                                   |                                                                                    | 76.3877   |
|                                |                                                                                   |                                                                                    | 93.9076   |
|                                |                                                                                   |                                                                                    | 103.4659  |
|                                |                                                                                   |                                                                                    | 110.6788  |
|                                |                                                                                   |                                                                                    | 134.1057  |
|                                |                                                                                   |                                                                                    | 145.9641  |
|                                |                                                                                   |                                                                                    | 163.8683  |
|                                |                                                                                   |                                                                                    | 174.2675  |
|                                |                                                                                   |                                                                                    | 193.6027  |
|                                |                                                                                   |                                                                                    | 209.5176  |
|                                |                                                                                   |                                                                                    | 229.5612  |
|                                |                                                                                   |                                                                                    | 235.0212  |
|                                |                                                                                   |                                                                                    | 240.4907  |
|                                |                                                                                   |                                                                                    | 249.3250  |
|                                |                                                                                   |                                                                                    | 258.6620  |
|                                |                                                                                   |                                                                                    | 268.5786  |
|                                |                                                                                   |                                                                                    | 282.4258  |
|                                |                                                                                   |                                                                                    | 285.8291  |
|                                |                                                                                   |                                                                                    | 308.4220  |
|                                |                                                                                   |                                                                                    | 319.0784  |
|                                |                                                                                   |                                                                                    | 339.2089  |
|                                |                                                                                   |                                                                                    | 346.7022  |
|                                |                                                                                   |                                                                                    | 363.6371  |
|                                |                                                                                   |                                                                                    | 380.2255  |
|                                |                                                                                   |                                                                                    | 392.5476  |
|                                |                                                                                   |                                                                                    | 402.7508  |
|                                |                                                                                   |                                                                                    | 413.3644  |
|                                |                                                                                   |                                                                                    | 419.2791  |
|                                |                                                                                   |                                                                                    | 422.7380  |
|                                |                                                                                   |                                                                                    | 443.8516  |
|                                |                                                                                   |                                                                                    | 449.7144  |
|                                |                                                                                   |                                                                                    | 454.3360  |
|                                |                                                                                   |                                                                                    | 463.0920  |
|                                |                                                                                   |                                                                                    | 466.9782  |
|                                |                                                                                   |                                                                                    | 477.7497  |
|                                |                                                                                   |                                                                                    | 482.4146  |
|                                |                                                                                   |                                                                                    | 485.9729  |
|                                |                                                                                   |                                                                                    | 491.4428  |
|                                |                                                                                   |                                                                                    | 518.1310  |
|                                |                                                                                   |                                                                                    | 527.6412  |
|                                |                                                                                   |                                                                                    | 545.2108  |
|                                |                                                                                   |                                                                                    | 551.8622  |
|                                |                                                                                   |                                                                                    | 559.2213  |
|                                |                                                                                   |                                                                                    | 571.1457  |
|                                |                                                                                   |                                                                                    | 582.7794  |
|                                |                                                                                   |                                                                                    | 592.1032  |
|                                |                                                                                   |                                                                                    | 597.6084  |
|                                |                                                                                   |                                                                                    | 613.4566  |
|                                |                                                                                   |                                                                                    | 614.3988  |
|                                |                                                                                   |                                                                                    | 626.4522  |
|                                |                                                                                   |                                                                                    | 627.8262  |
|                                |                                                                                   |                                                                                    | 636.3342  |
|                                |                                                                                   |                                                                                    | 655.1245  |
|                                |                                                                                   |                                                                                    | 677.5778  |
|                                |                                                                                   |                                                                                    | 683.3208  |
|                                |                                                                                   |                                                                                    | 705.4884  |
|                                |                                                                                   |                                                                                    | 706.7410  |
|                                |                                                                                   |                                                                                    | 711.7629  |
|                                |                                                                                   |                                                                                    | 713.1692  |
|                                |                                                                                   |                                                                                    | 716.6245  |
|                                |                                                                                   |                                                                                    | 728.9545  |
|                                |                                                                                   |                                                                                    | 730.4726  |
|                                |                                                                                   |                                                                                    | 746.0114  |
|                                |                                                                                   |                                                                                    | 758.3200  |
|                                |                                                                                   |                                                                                    | 764.1527  |
|                                |                                                                                   |                                                                                    | 772.8694  |
|                                |                                                                                   |                                                                                    | 781.8484  |
|                                |                                                                                   |                                                                                    | 790.6734  |
|                                |                                                                                   |                                                                                    | 799.8911  |
|                                |                                                                                   |                                                                                    | 807.7784  |
|                                |                                                                                   |                                                                                    | 809.1430  |
|                                |                                                                                   |                                                                                    | 813.1058  |
|                                |                                                                                   |                                                                                    | 819.0343  |
|                                |                                                                                   |                                                                                    | 843.3793  |
|                                |                                                                                   |                                                                                    | 846.1493  |
|                                |                                                                                   |                                                                                    | 856.0491  |
|                                |                                                                                   |                                                                                    | 856.5298  |
|                                |                                                                                   |                                                                                    | 865.0467  |
|                                |                                                                                   |                                                                                    | 867.0365  |
|                                |                                                                                   |                                                                                    | 872.8545  |
|                                |                                                                                   |                                                                                    | 878.8610  |
|                                |                                                                                   |                                                                                    | 897.1851  |
|                                |                                                                                   |                                                                                    | 902.7138  |
|                                |                                                                                   |                                                                                    | 912.4544  |
|                                |                                                                                   |                                                                                    | 915.5398  |
|                                |                                                                                   |                                                                                    | 930.3657  |
|                                |                                                                                   |                                                                                    | 944.1884  |
|                                |                                                                                   |                                                                                    | 954.1765  |
|                                |                                                                                   |                                                                                    | 964.5736  |
|                                |                                                                                   |                                                                                    | 983.9067  |
|                                |                                                                                   |                                                                                    | 989.0104  |
|                                |                                                                                   |                                                                                    | 996.3502  |
|                                |                                                                                   |                                                                                    | 997.8163  |
|                                |                                                                                   |                                                                                    | 998.1705  |
|                                |                                                                                   |                                                                                    | 1012.4123 |
|                                |                                                                                   |                                                                                    | 1015.7819 |
|                                |                                                                                   |                                                                                    | 1017.0388 |
|                                |                                                                                   |                                                                                    | 1018.2405 |
|                                |                                                                                   |                                                                                    | 1020.7346 |
|                                |                                                                                   |                                                                                    | 1021.1411 |
|                                |                                                                                   |                                                                                    | 1024.4167 |
|                                |                                                                                   |                                                                                    | 1026.3649 |
|                                |                                                                                   |                                                                                    | 1030.7112 |
|                                |                                                                                   |                                                                                    | 1063.2593 |
|                                |                                                                                   |                                                                                    | 1071.2773 |
|                                |                                                                                   |                                                                                    | 1100.5010 |
|                                |                                                                                   |                                                                                    | 1116.8038 |
|                                |                                                                                   |                                                                                    | 1123.8521 |
|                                |                                                                                   |                                                                                    | 1127.4513 |

|   |          |          |          |           |           |           |
|---|----------|----------|----------|-----------|-----------|-----------|
| H | -4.60014 | -3.45510 | -0.02964 | 1135.8484 | 1145.9868 | 1167.8295 |
| H | -5.98117 | -1.23506 | -0.05312 | 1177.2881 | 1180.9868 | 1182.7957 |
| H | -2.37687 | -4.51149 | -0.00276 | 1183.9986 | 1185.7644 | 1193.5007 |
| N | -1.38780 | 1.30028  | -0.01186 | 1198.5089 | 1216.0807 | 1222.2069 |
| N | -1.38782 | -1.30028 | -0.01191 | 1229.9084 | 1234.5780 | 1239.5383 |
| H | 0.00022  | -0.00008 | 1.45530  | 1240.5447 | 1255.4837 | 1257.5165 |
| C | -0.00001 | 3.27742  | 0.01504  | 1261.8308 | 1272.2278 | 1285.0463 |
| H | -0.00000 | 4.36099  | 0.02340  | 1315.7477 | 1337.0772 | 1337.5812 |
| C | -0.00000 | -3.27741 | 0.01489  | 1347.4195 | 1360.6533 | 1370.0330 |
| H | 0.00001  | -4.36099 | 0.02318  | 1375.5096 | 1388.0313 | 1396.8134 |
|   |          |          |          | 1415.1537 | 1433.5323 | 1440.6667 |
|   |          |          |          | 1448.3076 | 1458.7334 | 1461.1956 |
|   |          |          |          | 1473.0189 | 1477.1384 | 1486.9436 |
|   |          |          |          | 1496.0927 | 1505.1433 | 1507.8249 |
|   |          |          |          | 1511.9457 | 1530.7784 | 1534.4654 |
|   |          |          |          | 1545.0078 | 1567.8482 | 1569.4037 |
|   |          |          |          | 1602.5961 | 1630.8780 | 1634.2393 |
|   |          |          |          | 1662.9173 | 1672.6748 | 1676.5085 |
|   |          |          |          | 1678.1531 | 1686.8296 | 1691.0803 |
|   |          |          |          | 1692.3218 | 1694.7465 | 1705.4389 |
|   |          |          |          | 1715.1136 | 1724.9321 | 3194.3802 |
|   |          |          |          | 3200.9270 | 3205.0002 | 3205.3255 |
|   |          |          |          | 3209.3800 | 3209.8440 | 3211.0850 |
|   |          |          |          | 3211.2149 | 3214.3741 | 3215.0780 |
|   |          |          |          | 3215.8391 | 3217.0945 | 3221.7913 |
|   |          |          |          | 3225.4684 | 3226.1387 | 3226.4758 |
|   |          |          |          | 3227.2563 | 3228.4438 | 3229.5216 |
|   |          |          |          | 3230.9769 | 3233.8523 | 3238.8257 |
|   |          |          |          | 3242.8308 | 3242.8918 | 3249.7283 |

### Statistical Thermodynamic Analysis

Temperature = 403.15 K

Pressure = 1 atm

Zero-point correction = 0.546075

Electronic Energy = -1955.72160439

Internal Energy (E) = -1955.11256639

Enthalpy (H) = -1955.11129039

Gibbs Free Energy (G) = -1955.28755039

Gibbs Free Energy of Solvation = -1955.35455308

| St. Point                 | General Structure                                                                   | Ball & Stick model                                                                   |
|---------------------------|-------------------------------------------------------------------------------------|--------------------------------------------------------------------------------------|
| TS2 <sup>Hyd(spill)</sup> | 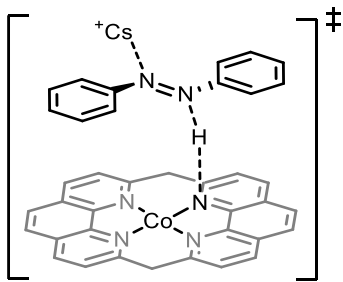 |  |

| Cartesian co-ordinate |          |          |          | Frequencies |           |           |
|-----------------------|----------|----------|----------|-------------|-----------|-----------|
| Atoms                 | X        | Y        | Z        |             |           |           |
|                       |          |          |          | -333.6079   | 16.9603   | 22.0985   |
|                       |          |          |          | 29.4019     | 39.1899   | 45.0560   |
|                       |          |          |          | 48.5082     | 54.1221   | 67.7966   |
|                       |          |          |          | 73.9706     | 85.2266   | 90.4980   |
| N                     | -0.36540 | 1.54303  | -0.20810 | 107.1269    | 111.2283  | 119.4727  |
| N                     | -0.94090 | 0.62812  | 0.41698  | 132.2038    | 167.1769  | 172.0154  |
| C                     | -2.34640 | 0.54230  | 0.21341  | 193.1428    | 213.4524  | 222.5890  |
| C                     | -3.06482 | 1.38661  | -0.64205 | 226.1802    | 240.0786  | 242.0772  |
| C                     | -2.99530 | -0.46633 | 0.92784  | 247.0934    | 256.0590  | 270.2057  |
| C                     | -4.43204 | 1.20114  | -0.77872 | 280.8440    | 297.8805  | 322.5358  |
| H                     | -2.54390 | 2.17073  | -1.17886 | 330.4582    | 341.8011  | 348.2322  |
| C                     | -4.36764 | -0.64278 | 0.78822  | 367.9433    | 385.6964  | 394.7549  |
| H                     | -2.41579 | -1.08523 | 1.60713  | 398.7671    | 410.0163  | 420.9072  |
| C                     | -5.08375 | 0.18956  | -0.06765 | 436.0557    | 441.9097  | 456.1462  |
| H                     | -5.00017 | 1.84900  | -1.43752 | 458.5709    | 472.1744  | 475.8817  |
| H                     | -4.87690 | -1.41985 | 1.34743  | 476.5638    | 484.4685  | 488.8415  |
| H                     | -6.15469 | 0.05672  | -0.17966 | 496.0291    | 517.7624  | 531.6480  |
| C                     | 1.03275  | 1.60972  | 0.04286  | 545.5905    | 552.1430  | 564.2979  |
| C                     | 1.58869  | 1.31970  | 1.29532  | 577.9018    | 582.7521  | 590.6445  |
| C                     | 1.84875  | 1.98202  | -1.02740 | 593.7651    | 601.4912  | 620.9181  |
| C                     | 2.97003  | 1.36227  | 1.45493  | 624.0652    | 626.2863  | 653.4318  |
| H                     | 0.92854  | 1.09680  | 2.12790  | 678.3547    | 683.5739  | 704.2571  |
| C                     | 3.23170  | 1.99738  | -0.86467 | 706.5495    | 711.8037  | 713.1768  |
| H                     | 1.38538  | 2.24928  | -1.97212 | 717.7773    | 729.5792  | 731.1723  |
| C                     | 3.79323  | 1.68392  | 0.37297  | 740.6075    | 745.7782  | 752.5681  |
| H                     | 3.40717  | 1.16948  | 2.42960  | 759.9808    | 763.4278  | 789.4188  |
| H                     | 3.86928  | 2.27642  | -1.69672 | 790.5699    | 800.0127  | 808.0743  |
| H                     | 4.86928  | 1.72260  | 0.50506  | 812.5726    | 821.0347  | 835.1798  |
| Cs                    | 1.13863  | -1.78685 | -0.24190 | 840.4766    | 854.3558  | 855.0597  |
| C                     | -2.47342 | 3.43093  | -0.00949 | 865.2448    | 866.7114  | 870.1886  |
| C                     | -3.82339 | -1.41770 | -0.02924 | 873.5182    | 884.7797  | 888.9164  |
| C                     | -5.04390 | 0.68674  | -0.04268 | 908.7168    | 914.7136  | 921.7825  |
| C                     | -3.70087 | 2.84513  | -0.02388 | 945.2328    | 946.8623  | 954.7675  |
| H                     | -2.37687 | 4.51148  | -0.00260 | 964.6093    | 977.2776  | 979.8877  |
| C                     | -3.70086 | -2.84511 | -0.02396 | 998.5853    | 1003.5360 | 1006.8809 |
| C                     | -5.04390 | -0.68672 | -0.04268 | 1010.4433   | 1013.0574 | 1014.6675 |
| C                     | -1.25756 | -2.64674 | 0.00047  | 1017.2043   | 1017.4260 | 1019.1006 |
| H                     | -5.98116 | 1.23509  | -0.05313 | 1024.5632   | 1033.1815 | 1037.8368 |
| H                     | -4.60015 | 3.45511  | -0.02958 | 1065.3238   | 1069.7670 | 1110.8422 |
| C                     | -2.47341 | -3.43094 | -0.00962 | 1119.4486   | 1122.2904 | 1124.0345 |
| H                     | -4.60014 | -3.45510 | -0.02964 | 1137.3802   | 1148.2474 | 1167.2512 |
| H                     | -5.98117 | -1.23506 | -0.05312 | 1169.9127   | 1174.4450 | 1180.2118 |
| H                     | -2.37687 | -4.51149 | -0.00276 | 1181.3388   | 1185.3580 | 1186.6102 |
| N                     | -1.38780 | 1.30028  | -0.01186 | 1202.0782   | 1213.0980 | 1217.8438 |
| N                     | -1.38782 | -1.30028 | -0.01191 | 1234.6758   | 1239.5859 | 1241.3158 |
| H                     | 0.00022  | -0.00008 | 1.45530  | 1252.9156   | 1254.7367 | 1259.8427 |
| C                     | -0.00001 | 3.27742  | 0.01504  | 1264.8004   | 1279.8455 | 1292.9024 |
| H                     | -0.00000 | 4.36099  | 0.02340  | 1315.2412   | 1330.4950 | 1334.6926 |
| C                     | -0.00000 | -3.27741 | 0.01489  | 1351.7603   | 1358.5657 | 1363.7566 |
| H                     | 0.00001  | -4.36099 | 0.02318  | 1371.5169   | 1387.9209 | 1401.0509 |
|                       |          |          |          | 1407.1478   | 1425.8970 | 1443.9043 |
|                       |          |          |          | 1444.9106   | 1455.0361 | 1461.2057 |
|                       |          |          |          | 1472.6671   | 1476.6034 | 1480.0289 |

|           |           |           |
|-----------|-----------|-----------|
| 1490.0773 | 1502.1137 | 1504.4020 |
| 1506.5205 | 1516.1772 | 1525.8012 |
| 1535.6322 | 1537.4636 | 1562.5696 |
| 1570.4460 | 1586.4153 | 1627.2420 |
| 1632.1866 | 1654.5949 | 1663.8658 |
| 1670.8056 | 1671.8967 | 1685.1139 |
| 1686.8179 | 1688.5062 | 1691.4343 |
| 1707.9150 | 1717.2250 | 1762.9330 |
| 3180.2445 | 3197.3998 | 3199.6253 |
| 3199.9037 | 3200.3300 | 3206.1671 |
| 3206.9475 | 3207.5920 | 3209.4290 |
| 3209.6193 | 3209.9544 | 3215.9906 |
| 3216.2957 | 3219.1386 | 3219.7809 |
| 3221.0035 | 3222.5131 | 3226.7822 |
| 3226.8398 | 3227.1136 | 3230.5910 |
| 3237.4170 | 3238.3415 | 3239.0369 |

### Statistical Thermodynamic Analysis

Temperature = 403.15 K

Pressure = 1 atm

Zero-point correction = 0.542687

Electronic Energy = -1955.70068110

Internal Energy (E) = -1955.0968191

Enthalpy (H) = -1955.0955431

Gibbs Free Energy (G) = -1955.2632231

Gibbs Free Energy of Solvation = -1955.33947791

| St. Point                | General Structure                                                                                                                                                                                                                                                                                                                                                                                                                                                                                                                                                                                                                                                                                                                                                                                | Ball & Stick model                                                                   |          |   |   |   |          |         |          |   |          |         |         |   |          |         |         |   |          |         |          |   |          |          |         |   |          |         |          |   |          |         |          |   |          |          |         |                                                                                                                                                                                                                                                                                                                                                                                                                                                                                                                                                                                                                                                                                                                                                                                                                                                   |        |         |         |         |         |         |         |         |         |         |         |         |          |          |          |          |          |          |          |          |          |          |          |          |          |          |          |          |          |          |          |          |          |          |          |          |
|--------------------------|--------------------------------------------------------------------------------------------------------------------------------------------------------------------------------------------------------------------------------------------------------------------------------------------------------------------------------------------------------------------------------------------------------------------------------------------------------------------------------------------------------------------------------------------------------------------------------------------------------------------------------------------------------------------------------------------------------------------------------------------------------------------------------------------------|--------------------------------------------------------------------------------------|----------|---|---|---|----------|---------|----------|---|----------|---------|---------|---|----------|---------|---------|---|----------|---------|----------|---|----------|----------|---------|---|----------|---------|----------|---|----------|---------|----------|---|----------|----------|---------|---------------------------------------------------------------------------------------------------------------------------------------------------------------------------------------------------------------------------------------------------------------------------------------------------------------------------------------------------------------------------------------------------------------------------------------------------------------------------------------------------------------------------------------------------------------------------------------------------------------------------------------------------------------------------------------------------------------------------------------------------------------------------------------------------------------------------------------------------|--------|---------|---------|---------|---------|---------|---------|---------|---------|---------|---------|---------|----------|----------|----------|----------|----------|----------|----------|----------|----------|----------|----------|----------|----------|----------|----------|----------|----------|----------|----------|----------|----------|----------|----------|----------|
| 15 <sup>Hyd(Spill)</sup> | 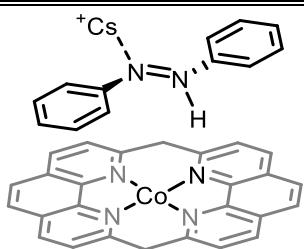                                                                                                                                                                                                                                                                                                                                                                                                                                                                                                                                                                                                                                                                                                              |  |          |   |   |   |          |         |          |   |          |         |         |   |          |         |         |   |          |         |          |   |          |          |         |   |          |         |          |   |          |         |          |   |          |          |         |                                                                                                                                                                                                                                                                                                                                                                                                                                                                                                                                                                                                                                                                                                                                                                                                                                                   |        |         |         |         |         |         |         |         |         |         |         |         |          |          |          |          |          |          |          |          |          |          |          |          |          |          |          |          |          |          |          |          |          |          |          |          |
|                          | <p style="text-align: center;"><b>Cartesian co-ordinate</b></p> <p>-----</p> <table border="1"> <thead> <tr> <th>Atoms</th> <th>X</th> <th>Y</th> <th>Z</th> </tr> </thead> <tbody> <tr><td>N</td><td>-0.36540</td><td>1.54303</td><td>-0.20810</td></tr> <tr><td>N</td><td>-0.94090</td><td>0.62812</td><td>0.41698</td></tr> <tr><td>C</td><td>-2.34640</td><td>0.54230</td><td>0.21341</td></tr> <tr><td>C</td><td>-3.06482</td><td>1.38661</td><td>-0.64205</td></tr> <tr><td>C</td><td>-2.99530</td><td>-0.46633</td><td>0.92784</td></tr> <tr><td>C</td><td>-4.43204</td><td>1.20114</td><td>-0.77872</td></tr> <tr><td>H</td><td>-2.54390</td><td>2.17073</td><td>-1.17886</td></tr> <tr><td>C</td><td>-4.36764</td><td>-0.64278</td><td>0.78822</td></tr> </tbody> </table> <p>-----</p> | Atoms                                                                                | X        | Y | Z | N | -0.36540 | 1.54303 | -0.20810 | N | -0.94090 | 0.62812 | 0.41698 | C | -2.34640 | 0.54230 | 0.21341 | C | -3.06482 | 1.38661 | -0.64205 | C | -2.99530 | -0.46633 | 0.92784 | C | -4.43204 | 1.20114 | -0.77872 | H | -2.54390 | 2.17073 | -1.17886 | C | -4.36764 | -0.64278 | 0.78822 | <p style="text-align: center;"><b>Frequencies</b></p> <table border="1"> <tbody> <tr><td>6.6710</td><td>27.2933</td><td>28.5098</td></tr> <tr><td>33.7402</td><td>43.8958</td><td>49.7448</td></tr> <tr><td>61.5893</td><td>65.3341</td><td>69.7420</td></tr> <tr><td>81.8326</td><td>89.2178</td><td>96.5332</td></tr> <tr><td>109.0701</td><td>124.8288</td><td>129.6393</td></tr> <tr><td>170.7010</td><td>176.7027</td><td>191.9832</td></tr> <tr><td>207.4067</td><td>221.7654</td><td>238.3499</td></tr> <tr><td>247.1232</td><td>251.6913</td><td>256.4804</td></tr> <tr><td>272.9346</td><td>275.0323</td><td>277.6443</td></tr> <tr><td>292.1482</td><td>305.2130</td><td>323.2354</td></tr> <tr><td>339.4637</td><td>350.2416</td><td>353.6125</td></tr> <tr><td>382.0306</td><td>402.2135</td><td>406.2930</td></tr> </tbody> </table> | 6.6710 | 27.2933 | 28.5098 | 33.7402 | 43.8958 | 49.7448 | 61.5893 | 65.3341 | 69.7420 | 81.8326 | 89.2178 | 96.5332 | 109.0701 | 124.8288 | 129.6393 | 170.7010 | 176.7027 | 191.9832 | 207.4067 | 221.7654 | 238.3499 | 247.1232 | 251.6913 | 256.4804 | 272.9346 | 275.0323 | 277.6443 | 292.1482 | 305.2130 | 323.2354 | 339.4637 | 350.2416 | 353.6125 | 382.0306 | 402.2135 | 406.2930 |
| Atoms                    | X                                                                                                                                                                                                                                                                                                                                                                                                                                                                                                                                                                                                                                                                                                                                                                                                | Y                                                                                    | Z        |   |   |   |          |         |          |   |          |         |         |   |          |         |         |   |          |         |          |   |          |          |         |   |          |         |          |   |          |         |          |   |          |          |         |                                                                                                                                                                                                                                                                                                                                                                                                                                                                                                                                                                                                                                                                                                                                                                                                                                                   |        |         |         |         |         |         |         |         |         |         |         |         |          |          |          |          |          |          |          |          |          |          |          |          |          |          |          |          |          |          |          |          |          |          |          |          |
| N                        | -0.36540                                                                                                                                                                                                                                                                                                                                                                                                                                                                                                                                                                                                                                                                                                                                                                                         | 1.54303                                                                              | -0.20810 |   |   |   |          |         |          |   |          |         |         |   |          |         |         |   |          |         |          |   |          |          |         |   |          |         |          |   |          |         |          |   |          |          |         |                                                                                                                                                                                                                                                                                                                                                                                                                                                                                                                                                                                                                                                                                                                                                                                                                                                   |        |         |         |         |         |         |         |         |         |         |         |         |          |          |          |          |          |          |          |          |          |          |          |          |          |          |          |          |          |          |          |          |          |          |          |          |
| N                        | -0.94090                                                                                                                                                                                                                                                                                                                                                                                                                                                                                                                                                                                                                                                                                                                                                                                         | 0.62812                                                                              | 0.41698  |   |   |   |          |         |          |   |          |         |         |   |          |         |         |   |          |         |          |   |          |          |         |   |          |         |          |   |          |         |          |   |          |          |         |                                                                                                                                                                                                                                                                                                                                                                                                                                                                                                                                                                                                                                                                                                                                                                                                                                                   |        |         |         |         |         |         |         |         |         |         |         |         |          |          |          |          |          |          |          |          |          |          |          |          |          |          |          |          |          |          |          |          |          |          |          |          |
| C                        | -2.34640                                                                                                                                                                                                                                                                                                                                                                                                                                                                                                                                                                                                                                                                                                                                                                                         | 0.54230                                                                              | 0.21341  |   |   |   |          |         |          |   |          |         |         |   |          |         |         |   |          |         |          |   |          |          |         |   |          |         |          |   |          |         |          |   |          |          |         |                                                                                                                                                                                                                                                                                                                                                                                                                                                                                                                                                                                                                                                                                                                                                                                                                                                   |        |         |         |         |         |         |         |         |         |         |         |         |          |          |          |          |          |          |          |          |          |          |          |          |          |          |          |          |          |          |          |          |          |          |          |          |
| C                        | -3.06482                                                                                                                                                                                                                                                                                                                                                                                                                                                                                                                                                                                                                                                                                                                                                                                         | 1.38661                                                                              | -0.64205 |   |   |   |          |         |          |   |          |         |         |   |          |         |         |   |          |         |          |   |          |          |         |   |          |         |          |   |          |         |          |   |          |          |         |                                                                                                                                                                                                                                                                                                                                                                                                                                                                                                                                                                                                                                                                                                                                                                                                                                                   |        |         |         |         |         |         |         |         |         |         |         |         |          |          |          |          |          |          |          |          |          |          |          |          |          |          |          |          |          |          |          |          |          |          |          |          |
| C                        | -2.99530                                                                                                                                                                                                                                                                                                                                                                                                                                                                                                                                                                                                                                                                                                                                                                                         | -0.46633                                                                             | 0.92784  |   |   |   |          |         |          |   |          |         |         |   |          |         |         |   |          |         |          |   |          |          |         |   |          |         |          |   |          |         |          |   |          |          |         |                                                                                                                                                                                                                                                                                                                                                                                                                                                                                                                                                                                                                                                                                                                                                                                                                                                   |        |         |         |         |         |         |         |         |         |         |         |         |          |          |          |          |          |          |          |          |          |          |          |          |          |          |          |          |          |          |          |          |          |          |          |          |
| C                        | -4.43204                                                                                                                                                                                                                                                                                                                                                                                                                                                                                                                                                                                                                                                                                                                                                                                         | 1.20114                                                                              | -0.77872 |   |   |   |          |         |          |   |          |         |         |   |          |         |         |   |          |         |          |   |          |          |         |   |          |         |          |   |          |         |          |   |          |          |         |                                                                                                                                                                                                                                                                                                                                                                                                                                                                                                                                                                                                                                                                                                                                                                                                                                                   |        |         |         |         |         |         |         |         |         |         |         |         |          |          |          |          |          |          |          |          |          |          |          |          |          |          |          |          |          |          |          |          |          |          |          |          |
| H                        | -2.54390                                                                                                                                                                                                                                                                                                                                                                                                                                                                                                                                                                                                                                                                                                                                                                                         | 2.17073                                                                              | -1.17886 |   |   |   |          |         |          |   |          |         |         |   |          |         |         |   |          |         |          |   |          |          |         |   |          |         |          |   |          |         |          |   |          |          |         |                                                                                                                                                                                                                                                                                                                                                                                                                                                                                                                                                                                                                                                                                                                                                                                                                                                   |        |         |         |         |         |         |         |         |         |         |         |         |          |          |          |          |          |          |          |          |          |          |          |          |          |          |          |          |          |          |          |          |          |          |          |          |
| C                        | -4.36764                                                                                                                                                                                                                                                                                                                                                                                                                                                                                                                                                                                                                                                                                                                                                                                         | -0.64278                                                                             | 0.78822  |   |   |   |          |         |          |   |          |         |         |   |          |         |         |   |          |         |          |   |          |          |         |   |          |         |          |   |          |         |          |   |          |          |         |                                                                                                                                                                                                                                                                                                                                                                                                                                                                                                                                                                                                                                                                                                                                                                                                                                                   |        |         |         |         |         |         |         |         |         |         |         |         |          |          |          |          |          |          |          |          |          |          |          |          |          |          |          |          |          |          |          |          |          |          |          |          |
| 6.6710                   | 27.2933                                                                                                                                                                                                                                                                                                                                                                                                                                                                                                                                                                                                                                                                                                                                                                                          | 28.5098                                                                              |          |   |   |   |          |         |          |   |          |         |         |   |          |         |         |   |          |         |          |   |          |          |         |   |          |         |          |   |          |         |          |   |          |          |         |                                                                                                                                                                                                                                                                                                                                                                                                                                                                                                                                                                                                                                                                                                                                                                                                                                                   |        |         |         |         |         |         |         |         |         |         |         |         |          |          |          |          |          |          |          |          |          |          |          |          |          |          |          |          |          |          |          |          |          |          |          |          |
| 33.7402                  | 43.8958                                                                                                                                                                                                                                                                                                                                                                                                                                                                                                                                                                                                                                                                                                                                                                                          | 49.7448                                                                              |          |   |   |   |          |         |          |   |          |         |         |   |          |         |         |   |          |         |          |   |          |          |         |   |          |         |          |   |          |         |          |   |          |          |         |                                                                                                                                                                                                                                                                                                                                                                                                                                                                                                                                                                                                                                                                                                                                                                                                                                                   |        |         |         |         |         |         |         |         |         |         |         |         |          |          |          |          |          |          |          |          |          |          |          |          |          |          |          |          |          |          |          |          |          |          |          |          |
| 61.5893                  | 65.3341                                                                                                                                                                                                                                                                                                                                                                                                                                                                                                                                                                                                                                                                                                                                                                                          | 69.7420                                                                              |          |   |   |   |          |         |          |   |          |         |         |   |          |         |         |   |          |         |          |   |          |          |         |   |          |         |          |   |          |         |          |   |          |          |         |                                                                                                                                                                                                                                                                                                                                                                                                                                                                                                                                                                                                                                                                                                                                                                                                                                                   |        |         |         |         |         |         |         |         |         |         |         |         |          |          |          |          |          |          |          |          |          |          |          |          |          |          |          |          |          |          |          |          |          |          |          |          |
| 81.8326                  | 89.2178                                                                                                                                                                                                                                                                                                                                                                                                                                                                                                                                                                                                                                                                                                                                                                                          | 96.5332                                                                              |          |   |   |   |          |         |          |   |          |         |         |   |          |         |         |   |          |         |          |   |          |          |         |   |          |         |          |   |          |         |          |   |          |          |         |                                                                                                                                                                                                                                                                                                                                                                                                                                                                                                                                                                                                                                                                                                                                                                                                                                                   |        |         |         |         |         |         |         |         |         |         |         |         |          |          |          |          |          |          |          |          |          |          |          |          |          |          |          |          |          |          |          |          |          |          |          |          |
| 109.0701                 | 124.8288                                                                                                                                                                                                                                                                                                                                                                                                                                                                                                                                                                                                                                                                                                                                                                                         | 129.6393                                                                             |          |   |   |   |          |         |          |   |          |         |         |   |          |         |         |   |          |         |          |   |          |          |         |   |          |         |          |   |          |         |          |   |          |          |         |                                                                                                                                                                                                                                                                                                                                                                                                                                                                                                                                                                                                                                                                                                                                                                                                                                                   |        |         |         |         |         |         |         |         |         |         |         |         |          |          |          |          |          |          |          |          |          |          |          |          |          |          |          |          |          |          |          |          |          |          |          |          |
| 170.7010                 | 176.7027                                                                                                                                                                                                                                                                                                                                                                                                                                                                                                                                                                                                                                                                                                                                                                                         | 191.9832                                                                             |          |   |   |   |          |         |          |   |          |         |         |   |          |         |         |   |          |         |          |   |          |          |         |   |          |         |          |   |          |         |          |   |          |          |         |                                                                                                                                                                                                                                                                                                                                                                                                                                                                                                                                                                                                                                                                                                                                                                                                                                                   |        |         |         |         |         |         |         |         |         |         |         |         |          |          |          |          |          |          |          |          |          |          |          |          |          |          |          |          |          |          |          |          |          |          |          |          |
| 207.4067                 | 221.7654                                                                                                                                                                                                                                                                                                                                                                                                                                                                                                                                                                                                                                                                                                                                                                                         | 238.3499                                                                             |          |   |   |   |          |         |          |   |          |         |         |   |          |         |         |   |          |         |          |   |          |          |         |   |          |         |          |   |          |         |          |   |          |          |         |                                                                                                                                                                                                                                                                                                                                                                                                                                                                                                                                                                                                                                                                                                                                                                                                                                                   |        |         |         |         |         |         |         |         |         |         |         |         |          |          |          |          |          |          |          |          |          |          |          |          |          |          |          |          |          |          |          |          |          |          |          |          |
| 247.1232                 | 251.6913                                                                                                                                                                                                                                                                                                                                                                                                                                                                                                                                                                                                                                                                                                                                                                                         | 256.4804                                                                             |          |   |   |   |          |         |          |   |          |         |         |   |          |         |         |   |          |         |          |   |          |          |         |   |          |         |          |   |          |         |          |   |          |          |         |                                                                                                                                                                                                                                                                                                                                                                                                                                                                                                                                                                                                                                                                                                                                                                                                                                                   |        |         |         |         |         |         |         |         |         |         |         |         |          |          |          |          |          |          |          |          |          |          |          |          |          |          |          |          |          |          |          |          |          |          |          |          |
| 272.9346                 | 275.0323                                                                                                                                                                                                                                                                                                                                                                                                                                                                                                                                                                                                                                                                                                                                                                                         | 277.6443                                                                             |          |   |   |   |          |         |          |   |          |         |         |   |          |         |         |   |          |         |          |   |          |          |         |   |          |         |          |   |          |         |          |   |          |          |         |                                                                                                                                                                                                                                                                                                                                                                                                                                                                                                                                                                                                                                                                                                                                                                                                                                                   |        |         |         |         |         |         |         |         |         |         |         |         |          |          |          |          |          |          |          |          |          |          |          |          |          |          |          |          |          |          |          |          |          |          |          |          |
| 292.1482                 | 305.2130                                                                                                                                                                                                                                                                                                                                                                                                                                                                                                                                                                                                                                                                                                                                                                                         | 323.2354                                                                             |          |   |   |   |          |         |          |   |          |         |         |   |          |         |         |   |          |         |          |   |          |          |         |   |          |         |          |   |          |         |          |   |          |          |         |                                                                                                                                                                                                                                                                                                                                                                                                                                                                                                                                                                                                                                                                                                                                                                                                                                                   |        |         |         |         |         |         |         |         |         |         |         |         |          |          |          |          |          |          |          |          |          |          |          |          |          |          |          |          |          |          |          |          |          |          |          |          |
| 339.4637                 | 350.2416                                                                                                                                                                                                                                                                                                                                                                                                                                                                                                                                                                                                                                                                                                                                                                                         | 353.6125                                                                             |          |   |   |   |          |         |          |   |          |         |         |   |          |         |         |   |          |         |          |   |          |          |         |   |          |         |          |   |          |         |          |   |          |          |         |                                                                                                                                                                                                                                                                                                                                                                                                                                                                                                                                                                                                                                                                                                                                                                                                                                                   |        |         |         |         |         |         |         |         |         |         |         |         |          |          |          |          |          |          |          |          |          |          |          |          |          |          |          |          |          |          |          |          |          |          |          |          |
| 382.0306                 | 402.2135                                                                                                                                                                                                                                                                                                                                                                                                                                                                                                                                                                                                                                                                                                                                                                                         | 406.2930                                                                             |          |   |   |   |          |         |          |   |          |         |         |   |          |         |         |   |          |         |          |   |          |          |         |   |          |         |          |   |          |         |          |   |          |          |         |                                                                                                                                                                                                                                                                                                                                                                                                                                                                                                                                                                                                                                                                                                                                                                                                                                                   |        |         |         |         |         |         |         |         |         |         |         |         |          |          |          |          |          |          |          |          |          |          |          |          |          |          |          |          |          |          |          |          |          |          |          |          |

|    |          |          |          |           |           |           |
|----|----------|----------|----------|-----------|-----------|-----------|
| H  | -2.41579 | -1.08523 | 1.60713  | 407.6228  | 420.8013  | 422.8827  |
| C  | -5.08375 | 0.18956  | -0.06765 | 447.2330  | 457.3818  | 464.3835  |
| H  | -5.00017 | 1.84900  | -1.43752 | 472.7248  | 476.9137  | 485.9154  |
| H  | -4.87690 | -1.41985 | 1.34743  | 491.1614  | 493.3341  | 496.6127  |
| H  | -6.15469 | 0.05672  | -0.17966 | 505.3049  | 526.9945  | 535.8142  |
| C  | 1.03275  | 1.60972  | 0.04286  | 552.0065  | 556.7560  | 566.2377  |
| C  | 1.58869  | 1.31970  | 1.29532  | 585.6608  | 586.3006  | 593.8073  |
| C  | 1.84875  | 1.98202  | -1.02740 | 594.4328  | 599.9409  | 624.1825  |
| C  | 2.97003  | 1.36227  | 1.45493  | 626.4797  | 627.8905  | 659.3229  |
| H  | 0.92854  | 1.09680  | 2.12790  | 674.6712  | 683.7279  | 688.0851  |
| C  | 3.23170  | 1.99738  | -0.86467 | 699.9299  | 712.3576  | 713.4711  |
| H  | 1.38538  | 2.24928  | -1.97212 | 717.1368  | 720.4415  | 722.2928  |
| C  | 3.79323  | 1.68392  | 0.37297  | 744.2749  | 745.8080  | 755.5384  |
| H  | 3.40717  | 1.16948  | 2.42960  | 764.0446  | 773.0223  | 775.4924  |
| H  | 3.86928  | 2.27642  | -1.69672 | 775.8177  | 805.6097  | 815.4743  |
| H  | 4.86928  | 1.72260  | 0.50506  | 819.5127  | 823.5469  | 836.7992  |
| Cs | 1.13863  | -1.78685 | -0.24190 | 850.5275  | 856.3735  | 858.2430  |
| C  | -2.47342 | 3.43093  | -0.00949 | 859.0408  | 860.5427  | 863.0754  |
| C  | -3.82339 | -1.41770 | -0.02924 | 871.0754  | 875.9986  | 883.5131  |
| C  | -5.04390 | 0.68674  | -0.04268 | 885.4349  | 907.2378  | 919.1542  |
| C  | -3.70087 | 2.84513  | -0.02388 | 920.1378  | 937.4685  | 941.5923  |
| H  | -2.37687 | 4.51148  | -0.00260 | 945.7965  | 982.2735  | 989.2332  |
| C  | -3.70086 | -2.84511 | -0.02396 | 991.3402  | 993.2394  | 1007.7200 |
| C  | -5.04390 | -0.68672 | -0.04268 | 1010.0881 | 1012.6353 | 1015.2182 |
| C  | -1.25756 | -2.64674 | 0.00047  | 1016.0555 | 1017.3832 | 1018.0080 |
| H  | -5.98116 | 1.23509  | -0.05313 | 1019.0967 | 1022.1572 | 1040.9104 |
| H  | -4.60015 | 3.45511  | -0.02958 | 1064.5179 | 1068.1473 | 1090.9992 |
| C  | -2.47341 | -3.43094 | -0.00962 | 1117.1184 | 1121.1802 | 1128.3787 |
| H  | -4.60014 | -3.45510 | -0.02964 | 1133.8884 | 1142.7172 | 1157.1361 |
| H  | -5.98117 | -1.23506 | -0.05312 | 1166.9847 | 1175.2281 | 1178.3813 |
| H  | -2.37687 | -4.51149 | -0.00276 | 1182.6442 | 1183.2151 | 1187.2224 |
| N  | -1.38780 | 1.30028  | -0.01186 | 1196.1028 | 1203.4370 | 1231.3727 |
| N  | -1.38782 | -1.30028 | -0.01191 | 1240.1440 | 1244.9762 | 1246.5510 |
| H  | 0.00022  | -0.00008 | 1.45530  | 1248.9576 | 1258.7413 | 1259.9295 |
| C  | -0.00001 | 3.27742  | 0.01504  | 1275.7297 | 1293.9552 | 1298.5548 |
| H  | -0.00000 | 4.36099  | 0.02340  | 1303.7383 | 1330.2031 | 1333.8281 |
| C  | -0.00000 | -3.27741 | 0.01489  | 1344.6872 | 1361.4041 | 1371.0899 |
| H  | 0.00001  | -4.36099 | 0.02318  | 1384.6857 | 1395.5542 | 1418.7726 |
|    |          |          |          | 1422.9577 | 1435.7536 | 1452.6494 |
|    |          |          |          | 1454.8768 | 1457.2089 | 1460.5037 |
|    |          |          |          | 1468.8870 | 1470.4979 | 1479.0932 |
|    |          |          |          | 1479.7716 | 1486.2763 | 1507.7817 |
|    |          |          |          | 1515.3393 | 1522.5651 | 1527.1028 |
|    |          |          |          | 1537.7995 | 1548.9943 | 1561.0545 |
|    |          |          |          | 1569.7794 | 1576.2107 | 1624.4963 |
|    |          |          |          | 1631.5311 | 1656.0408 | 1671.0498 |
|    |          |          |          | 1672.7089 | 1676.8411 | 1687.6613 |
|    |          |          |          | 1696.5947 | 1697.7581 | 1702.4595 |
|    |          |          |          | 1708.3989 | 1715.4896 | 3187.1101 |
|    |          |          |          | 3191.6662 | 3204.2140 | 3204.4095 |
|    |          |          |          | 3207.6628 | 3208.1096 | 3209.1034 |
|    |          |          |          | 3210.8704 | 3210.9698 | 3212.5720 |
|    |          |          |          | 3217.6878 | 3218.2458 | 3221.3663 |
|    |          |          |          | 3223.8466 | 3225.3278 | 3225.8509 |
|    |          |          |          | 3226.9903 | 3229.4383 | 3229.9844 |

|                                           |                                                 |           |           |
|-------------------------------------------|-------------------------------------------------|-----------|-----------|
|                                           | 3231.3644                                       | 3235.3782 | 3238.5665 |
|                                           | 3240.6221                                       | 3240.9900 | 3502.3630 |
| <b>Statistical Thermodynamic Analysis</b> |                                                 |           |           |
| Temperature = 403.15 K                    | Pressure = 1 atm                                |           |           |
| Zero-point correction = 0.547990          | Electronic Energy = -1955.77280451              |           |           |
| Internal Energy (E) = -1955.16444651      | Enthalpy (H) = -1955.16316951                   |           |           |
| Gibbs Free Energy (G) = -1955.32657851    | Gibbs Free Energy of Solvation = -1955.39490889 |           |           |

| St. Pt.                     | General Structure                                                                 | Ball & Stick model                                                                 |          |          |          |          |
|-----------------------------|-----------------------------------------------------------------------------------|------------------------------------------------------------------------------------|----------|----------|----------|----------|
| I2 <sup>Hyd</sup>           | 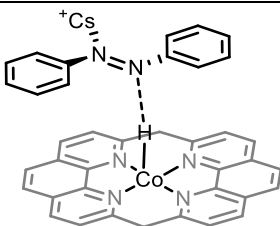 |  |          |          |          |          |
| <b>Cartesian coordinate</b> |                                                                                   | <b>Frequencies</b>                                                                 |          |          |          |          |
| -----                       |                                                                                   |                                                                                    |          |          |          |          |
| <b>Atoms</b>                | <b>X</b>                                                                          | <b>Y</b>                                                                           | <b>Z</b> |          |          |          |
| -----                       |                                                                                   |                                                                                    |          |          |          |          |
| N                           | -0.36540                                                                          | 1.54303                                                                            | -0.20810 | 14.2341  | 24.6861  | 29.5044  |
| N                           | -0.94090                                                                          | 0.62812                                                                            | 0.41698  | 40.2388  | 51.3154  | 52.1005  |
| C                           | -2.34640                                                                          | 0.54230                                                                            | 0.21341  | 55.8797  | 63.7921  | 69.6399  |
| C                           | -3.06482                                                                          | 1.38661                                                                            | -0.64205 | 78.2514  | 88.2091  | 97.2984  |
| C                           | -2.99530                                                                          | -0.46633                                                                           | 0.92784  | 105.3787 | 116.7530 | 123.3358 |
| C                           | -4.43204                                                                          | 1.20114                                                                            | -0.77872 | 136.3745 | 146.6586 | 168.3592 |
| H                           | -2.54390                                                                          | 2.17073                                                                            | -1.17886 | 175.8305 | 200.0686 | 221.4465 |
| C                           | -4.36764                                                                          | -0.64278                                                                           | 0.78822  | 242.6964 | 250.1965 | 260.1420 |
| H                           | -2.41579                                                                          | -1.08523                                                                           | 1.60713  | 262.3191 | 267.8039 | 282.5353 |
| C                           | -5.08375                                                                          | 0.18956                                                                            | -0.06765 | 283.5246 | 301.4575 | 307.6297 |
| H                           | -5.00017                                                                          | 1.84900                                                                            | -1.43752 | 338.9002 | 341.8447 | 350.5119 |
| H                           | -4.87690                                                                          | -1.41985                                                                           | 1.34743  | 381.8385 | 384.2844 | 405.4213 |
| H                           | -6.15469                                                                          | 0.05672                                                                            | -0.17966 | 406.6023 | 410.9878 | 418.3530 |
| C                           | 1.03275                                                                           | 1.60972                                                                            | 0.04286  | 426.3696 | 448.7444 | 460.3736 |
| C                           | 1.58869                                                                           | 1.31970                                                                            | 1.29532  | 461.6046 | 465.9814 | 477.5745 |
| C                           | 1.84875                                                                           | 1.98202                                                                            | -1.02740 | 484.6703 | 487.8298 | 491.6864 |
| C                           | 2.97003                                                                           | 1.36227                                                                            | 1.45493  | 495.8610 | 536.5291 | 537.3104 |
| H                           | 0.92854                                                                           | 1.09680                                                                            | 2.12790  | 553.8738 | 558.2369 | 571.8766 |
| C                           | 3.23170                                                                           | 1.99738                                                                            | -0.86467 | 585.1280 | 586.6431 | 595.4320 |
| H                           | 1.38538                                                                           | 2.24928                                                                            | -1.97212 | 598.0853 | 600.5377 | 623.6905 |
| C                           | 3.79323                                                                           | 1.68392                                                                            | 0.37297  | 628.2068 | 628.9335 | 678.7112 |
| H                           | 3.40717                                                                           | 1.16948                                                                            | 2.42960  | 679.4681 | 687.8328 | 689.9671 |
| H                           | 3.86928                                                                           | 2.27642                                                                            | -1.69672 | 701.4143 | 711.4944 | 715.2305 |
|                             |                                                                                   |                                                                                    |          | 718.7608 | 721.5449 | 725.3767 |
|                             |                                                                                   |                                                                                    |          | 742.8576 | 749.6610 | 754.5383 |
|                             |                                                                                   |                                                                                    |          | 760.2828 | 766.5059 | 769.9978 |
|                             |                                                                                   |                                                                                    |          | 774.2134 | 785.8169 | 796.6709 |

|    |          |          |          |           |           |           |
|----|----------|----------|----------|-----------|-----------|-----------|
| H  | 4.86928  | 1.72260  | 0.50506  | 816.1990  | 820.9822  | 830.0080  |
| Cs | 1.13863  | -1.78685 | -0.24190 | 835.0177  | 844.8820  | 855.4805  |
| C  | -2.47342 | 3.43093  | -0.00949 | 859.9429  | 861.4263  | 866.4479  |
| C  | -3.82339 | -1.41770 | -0.02924 | 868.2900  | 872.8347  | 875.0272  |
| C  | -5.04390 | 0.68674  | -0.04268 | 880.5289  | 907.4315  | 919.1741  |
| C  | -3.70087 | 2.84513  | -0.02388 | 936.1143  | 942.2026  | 951.3704  |
| H  | -2.37687 | 4.51148  | -0.00260 | 953.3713  | 968.8929  | 977.9309  |
| C  | -3.70086 | -2.84511 | -0.02396 | 982.2994  | 1000.6082 | 1005.5861 |
| C  | -5.04390 | -0.68672 | -0.04268 | 1010.2106 | 1011.3258 | 1013.0126 |
| C  | -1.25756 | -2.64674 | 0.00047  | 1018.2036 | 1018.3027 | 1018.5966 |
| H  | -5.98116 | 1.23509  | -0.05313 | 1020.9706 | 1026.0707 | 1026.8896 |
| H  | -4.60015 | 3.45511  | -0.02958 | 1043.1962 | 1060.3700 | 1061.2472 |
| C  | -2.47341 | -3.43094 | -0.00962 | 1109.4587 | 1115.2560 | 1117.7599 |
| H  | -4.60014 | -3.45510 | -0.02964 | 1137.1979 | 1143.5158 | 1159.0328 |
| H  | -5.98117 | -1.23506 | -0.05312 | 1170.0093 | 1174.1197 | 1180.9949 |
| H  | -2.37687 | -4.51149 | -0.00276 | 1182.5340 | 1183.1943 | 1186.0996 |
| N  | -1.38780 | 1.30028  | -0.01186 | 1187.3483 | 1187.7269 | 1232.0715 |
| N  | -1.38782 | -1.30028 | -0.01191 | 1232.8768 | 1241.1002 | 1243.8109 |
| H  | 0.00022  | -0.00008 | 1.45530  | 1246.9702 | 1256.9077 | 1257.2735 |
| C  | -0.00001 | 3.27742  | 0.01504  | 1273.8749 | 1283.1134 | 1298.4245 |
| H  | -0.00000 | 4.36099  | 0.02340  | 1301.4289 | 1329.2608 | 1333.4732 |
| C  | -0.00000 | -3.27741 | 0.01489  | 1342.2546 | 1363.1721 | 1377.4699 |
| H  | 0.00001  | -4.36099 | 0.02318  | 1382.8039 | 1395.1480 | 1417.0467 |
|    |          |          |          | 1421.7967 | 1431.1412 | 1451.0568 |
|    |          |          |          | 1456.5818 | 1465.9423 | 1470.9407 |
|    |          |          |          | 1475.7107 | 1478.5228 | 1483.7019 |
|    |          |          |          | 1485.5104 | 1502.6243 | 1509.9378 |
|    |          |          |          | 1518.9482 | 1531.2217 | 1531.5483 |
|    |          |          |          | 1541.5020 | 1565.2168 | 1568.7592 |
|    |          |          |          | 1573.3749 | 1622.0828 | 1637.0252 |
|    |          |          |          | 1650.5078 | 1655.4298 | 1673.5933 |
|    |          |          |          | 1681.2303 | 1685.2059 | 1690.5890 |
|    |          |          |          | 1696.8156 | 1704.1055 | 1704.7171 |
|    |          |          |          | 1708.9550 | 1716.8349 | 2180.4132 |
|    |          |          |          | 3201.8871 | 3202.6159 | 3204.9732 |
|    |          |          |          | 3206.2595 | 3207.1266 | 3208.1967 |
|    |          |          |          | 3209.1888 | 3213.4581 | 3214.5433 |
|    |          |          |          | 3215.3459 | 3220.2980 | 3221.7057 |
|    |          |          |          | 3222.0071 | 3222.3321 | 3223.3743 |
|    |          |          |          | 3226.3731 | 3226.6505 | 3226.7457 |
|    |          |          |          | 3229.2274 | 3231.3570 | 3237.2439 |
|    |          |          |          | 3239.6404 | 3245.3386 | 3256.5327 |

### Statistical Thermodynamic Analysis

Temperature = 403.15 K

Pressure = 1 atm

Zero-point correction = 0.544434

Electronic Energy = -1955.76165576

Internal Energy (E) = -1955.15504876

Enthalpy (H) = -1955.15377176

Gibbs Free Energy (G) = -1955.32386176

Gibbs Free Energy of Solvation = -1955.39202528



| St. Point                                                                                                                                                                                                                                                                                                                                                                                                                                                                                                                                                                                                                                                                                                                                                                                                                                                                                                                                                                                                                                                                                                                                                                                                                                                                                                                                                                                                                                                                                                                                                                                                                                                                                                                                                                                                                                                                                                                                                                                                                                                                                                                                                                                                                                                                                                                                                                                                                                                                                                                                                                                                                                                                                       | General Structure                                                                 | Ball & Stick model                                                                 |          |   |   |   |          |         |          |   |          |         |         |   |          |         |         |   |          |         |          |   |          |          |         |   |          |         |          |   |          |         |          |   |          |          |         |   |          |          |         |   |          |         |          |   |          |         |          |   |          |          |         |   |          |         |          |   |         |         |         |   |         |         |         |   |         |         |          |   |         |         |         |   |         |         |         |   |         |         |          |   |         |         |          |   |         |         |         |   |         |         |         |   |         |         |          |   |         |         |         |    |         |          |          |   |          |         |          |   |          |          |          |   |          |         |          |   |          |         |          |   |          |         |          |   |          |          |          |   |          |          |          |   |          |          |         |   |          |         |          |                                                                                                                                                                                                                                                                                                                                                                                                                                                                                                                                                                                                                                                                                                                                                                                                                                                                                                                                                                                                                                                                                                                                                                                                                                                                                                                                                                                                                                                                                                                                                                                                                                                                                                                                                                                                                                                                                                                                                                                                                                                                                                                                                                                                                                                                                                                                                                                                                                                                                                                   |           |        |         |         |         |         |         |         |         |         |         |          |          |          |          |          |          |          |          |          |          |          |          |          |          |          |          |          |          |          |          |          |          |          |          |          |          |          |          |          |          |          |          |          |          |          |          |          |          |          |          |          |          |          |          |          |          |          |          |          |          |          |          |          |          |          |          |          |          |          |          |          |          |          |          |          |          |          |          |          |          |          |          |          |          |          |          |          |          |          |          |          |          |          |          |          |          |          |          |          |          |          |          |           |           |           |           |           |           |           |           |           |           |           |
|-------------------------------------------------------------------------------------------------------------------------------------------------------------------------------------------------------------------------------------------------------------------------------------------------------------------------------------------------------------------------------------------------------------------------------------------------------------------------------------------------------------------------------------------------------------------------------------------------------------------------------------------------------------------------------------------------------------------------------------------------------------------------------------------------------------------------------------------------------------------------------------------------------------------------------------------------------------------------------------------------------------------------------------------------------------------------------------------------------------------------------------------------------------------------------------------------------------------------------------------------------------------------------------------------------------------------------------------------------------------------------------------------------------------------------------------------------------------------------------------------------------------------------------------------------------------------------------------------------------------------------------------------------------------------------------------------------------------------------------------------------------------------------------------------------------------------------------------------------------------------------------------------------------------------------------------------------------------------------------------------------------------------------------------------------------------------------------------------------------------------------------------------------------------------------------------------------------------------------------------------------------------------------------------------------------------------------------------------------------------------------------------------------------------------------------------------------------------------------------------------------------------------------------------------------------------------------------------------------------------------------------------------------------------------------------------------|-----------------------------------------------------------------------------------|------------------------------------------------------------------------------------|----------|---|---|---|----------|---------|----------|---|----------|---------|---------|---|----------|---------|---------|---|----------|---------|----------|---|----------|----------|---------|---|----------|---------|----------|---|----------|---------|----------|---|----------|----------|---------|---|----------|----------|---------|---|----------|---------|----------|---|----------|---------|----------|---|----------|----------|---------|---|----------|---------|----------|---|---------|---------|---------|---|---------|---------|---------|---|---------|---------|----------|---|---------|---------|---------|---|---------|---------|---------|---|---------|---------|----------|---|---------|---------|----------|---|---------|---------|---------|---|---------|---------|---------|---|---------|---------|----------|---|---------|---------|---------|----|---------|----------|----------|---|----------|---------|----------|---|----------|----------|----------|---|----------|---------|----------|---|----------|---------|----------|---|----------|---------|----------|---|----------|----------|----------|---|----------|----------|----------|---|----------|----------|---------|---|----------|---------|----------|-------------------------------------------------------------------------------------------------------------------------------------------------------------------------------------------------------------------------------------------------------------------------------------------------------------------------------------------------------------------------------------------------------------------------------------------------------------------------------------------------------------------------------------------------------------------------------------------------------------------------------------------------------------------------------------------------------------------------------------------------------------------------------------------------------------------------------------------------------------------------------------------------------------------------------------------------------------------------------------------------------------------------------------------------------------------------------------------------------------------------------------------------------------------------------------------------------------------------------------------------------------------------------------------------------------------------------------------------------------------------------------------------------------------------------------------------------------------------------------------------------------------------------------------------------------------------------------------------------------------------------------------------------------------------------------------------------------------------------------------------------------------------------------------------------------------------------------------------------------------------------------------------------------------------------------------------------------------------------------------------------------------------------------------------------------------------------------------------------------------------------------------------------------------------------------------------------------------------------------------------------------------------------------------------------------------------------------------------------------------------------------------------------------------------------------------------------------------------------------------------------------------|-----------|--------|---------|---------|---------|---------|---------|---------|---------|---------|---------|----------|----------|----------|----------|----------|----------|----------|----------|----------|----------|----------|----------|----------|----------|----------|----------|----------|----------|----------|----------|----------|----------|----------|----------|----------|----------|----------|----------|----------|----------|----------|----------|----------|----------|----------|----------|----------|----------|----------|----------|----------|----------|----------|----------|----------|----------|----------|----------|----------|----------|----------|----------|----------|----------|----------|----------|----------|----------|----------|----------|----------|----------|----------|----------|----------|----------|----------|----------|----------|----------|----------|----------|----------|----------|----------|----------|----------|----------|----------|----------|----------|----------|----------|----------|----------|----------|----------|----------|----------|----------|----------|----------|-----------|-----------|-----------|-----------|-----------|-----------|-----------|-----------|-----------|-----------|-----------|
| TS1 <sup>Hyd</sup>                                                                                                                                                                                                                                                                                                                                                                                                                                                                                                                                                                                                                                                                                                                                                                                                                                                                                                                                                                                                                                                                                                                                                                                                                                                                                                                                                                                                                                                                                                                                                                                                                                                                                                                                                                                                                                                                                                                                                                                                                                                                                                                                                                                                                                                                                                                                                                                                                                                                                                                                                                                                                                                                              | 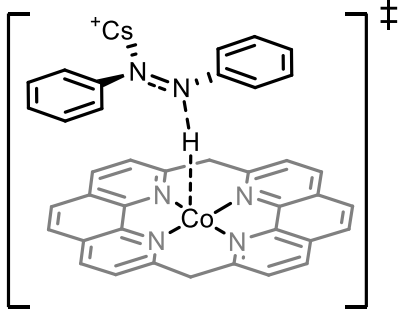 |  |          |   |   |   |          |         |          |   |          |         |         |   |          |         |         |   |          |         |          |   |          |          |         |   |          |         |          |   |          |         |          |   |          |          |         |   |          |          |         |   |          |         |          |   |          |         |          |   |          |          |         |   |          |         |          |   |         |         |         |   |         |         |         |   |         |         |          |   |         |         |         |   |         |         |         |   |         |         |          |   |         |         |          |   |         |         |         |   |         |         |         |   |         |         |          |   |         |         |         |    |         |          |          |   |          |         |          |   |          |          |          |   |          |         |          |   |          |         |          |   |          |         |          |   |          |          |          |   |          |          |          |   |          |          |         |   |          |         |          |                                                                                                                                                                                                                                                                                                                                                                                                                                                                                                                                                                                                                                                                                                                                                                                                                                                                                                                                                                                                                                                                                                                                                                                                                                                                                                                                                                                                                                                                                                                                                                                                                                                                                                                                                                                                                                                                                                                                                                                                                                                                                                                                                                                                                                                                                                                                                                                                                                                                                                                   |           |        |         |         |         |         |         |         |         |         |         |          |          |          |          |          |          |          |          |          |          |          |          |          |          |          |          |          |          |          |          |          |          |          |          |          |          |          |          |          |          |          |          |          |          |          |          |          |          |          |          |          |          |          |          |          |          |          |          |          |          |          |          |          |          |          |          |          |          |          |          |          |          |          |          |          |          |          |          |          |          |          |          |          |          |          |          |          |          |          |          |          |          |          |          |          |          |          |          |          |          |          |          |           |           |           |           |           |           |           |           |           |           |           |
| <p style="text-align: center;"><b>Cartesian coordinate</b></p> <hr style="border-top: 1px dashed black;"/> <table border="1"> <thead> <tr> <th>Atoms</th> <th>X</th> <th>Y</th> <th>Z</th> </tr> </thead> <tbody> <tr><td>N</td><td>-0.36540</td><td>1.54303</td><td>-0.20810</td></tr> <tr><td>N</td><td>-0.94090</td><td>0.62812</td><td>0.41698</td></tr> <tr><td>C</td><td>-2.34640</td><td>0.54230</td><td>0.21341</td></tr> <tr><td>C</td><td>-3.06482</td><td>1.38661</td><td>-0.64205</td></tr> <tr><td>C</td><td>-2.99530</td><td>-0.46633</td><td>0.92784</td></tr> <tr><td>C</td><td>-4.43204</td><td>1.20114</td><td>-0.77872</td></tr> <tr><td>H</td><td>-2.54390</td><td>2.17073</td><td>-1.17886</td></tr> <tr><td>C</td><td>-4.36764</td><td>-0.64278</td><td>0.78822</td></tr> <tr><td>H</td><td>-2.41579</td><td>-1.08523</td><td>1.60713</td></tr> <tr><td>C</td><td>-5.08375</td><td>0.18956</td><td>-0.06765</td></tr> <tr><td>H</td><td>-5.00017</td><td>1.84900</td><td>-1.43752</td></tr> <tr><td>H</td><td>-4.87690</td><td>-1.41985</td><td>1.34743</td></tr> <tr><td>H</td><td>-6.15469</td><td>0.05672</td><td>-0.17966</td></tr> <tr><td>C</td><td>1.03275</td><td>1.60972</td><td>0.04286</td></tr> <tr><td>C</td><td>1.58869</td><td>1.31970</td><td>1.29532</td></tr> <tr><td>C</td><td>1.84875</td><td>1.98202</td><td>-1.02740</td></tr> <tr><td>C</td><td>2.97003</td><td>1.36227</td><td>1.45493</td></tr> <tr><td>H</td><td>0.92854</td><td>1.09680</td><td>2.12790</td></tr> <tr><td>C</td><td>3.23170</td><td>1.99738</td><td>-0.86467</td></tr> <tr><td>H</td><td>1.38538</td><td>2.24928</td><td>-1.97212</td></tr> <tr><td>C</td><td>3.79323</td><td>1.68392</td><td>0.37297</td></tr> <tr><td>H</td><td>3.40717</td><td>1.16948</td><td>2.42960</td></tr> <tr><td>H</td><td>3.86928</td><td>2.27642</td><td>-1.69672</td></tr> <tr><td>H</td><td>4.86928</td><td>1.72260</td><td>0.50506</td></tr> <tr><td>Cs</td><td>1.13863</td><td>-1.78685</td><td>-0.24190</td></tr> <tr><td>C</td><td>-2.47342</td><td>3.43093</td><td>-0.00949</td></tr> <tr><td>C</td><td>-3.82339</td><td>-1.41770</td><td>-0.02924</td></tr> <tr><td>C</td><td>-5.04390</td><td>0.68674</td><td>-0.04268</td></tr> <tr><td>C</td><td>-3.70087</td><td>2.84513</td><td>-0.02388</td></tr> <tr><td>H</td><td>-2.37687</td><td>4.51148</td><td>-0.00260</td></tr> <tr><td>C</td><td>-3.70086</td><td>-2.84511</td><td>-0.02396</td></tr> <tr><td>C</td><td>-5.04390</td><td>-0.68672</td><td>-0.04268</td></tr> <tr><td>C</td><td>-1.25756</td><td>-2.64674</td><td>0.00047</td></tr> <tr><td>H</td><td>-5.98116</td><td>1.23509</td><td>-0.05313</td></tr> </tbody> </table> |                                                                                   | Atoms                                                                              | X        | Y | Z | N | -0.36540 | 1.54303 | -0.20810 | N | -0.94090 | 0.62812 | 0.41698 | C | -2.34640 | 0.54230 | 0.21341 | C | -3.06482 | 1.38661 | -0.64205 | C | -2.99530 | -0.46633 | 0.92784 | C | -4.43204 | 1.20114 | -0.77872 | H | -2.54390 | 2.17073 | -1.17886 | C | -4.36764 | -0.64278 | 0.78822 | H | -2.41579 | -1.08523 | 1.60713 | C | -5.08375 | 0.18956 | -0.06765 | H | -5.00017 | 1.84900 | -1.43752 | H | -4.87690 | -1.41985 | 1.34743 | H | -6.15469 | 0.05672 | -0.17966 | C | 1.03275 | 1.60972 | 0.04286 | C | 1.58869 | 1.31970 | 1.29532 | C | 1.84875 | 1.98202 | -1.02740 | C | 2.97003 | 1.36227 | 1.45493 | H | 0.92854 | 1.09680 | 2.12790 | C | 3.23170 | 1.99738 | -0.86467 | H | 1.38538 | 2.24928 | -1.97212 | C | 3.79323 | 1.68392 | 0.37297 | H | 3.40717 | 1.16948 | 2.42960 | H | 3.86928 | 2.27642 | -1.69672 | H | 4.86928 | 1.72260 | 0.50506 | Cs | 1.13863 | -1.78685 | -0.24190 | C | -2.47342 | 3.43093 | -0.00949 | C | -3.82339 | -1.41770 | -0.02924 | C | -5.04390 | 0.68674 | -0.04268 | C | -3.70087 | 2.84513 | -0.02388 | H | -2.37687 | 4.51148 | -0.00260 | C | -3.70086 | -2.84511 | -0.02396 | C | -5.04390 | -0.68672 | -0.04268 | C | -1.25756 | -2.64674 | 0.00047 | H | -5.98116 | 1.23509 | -0.05313 | <p style="text-align: center;"><b>Frequencies</b></p> <table border="1"> <tbody> <tr><td>-713.6423</td><td>9.8729</td><td>25.8497</td></tr> <tr><td>28.5252</td><td>39.7924</td><td>50.5448</td></tr> <tr><td>54.1918</td><td>62.4594</td><td>69.8988</td></tr> <tr><td>77.0474</td><td>97.4742</td><td>104.3999</td></tr> <tr><td>108.8623</td><td>114.9102</td><td>128.5425</td></tr> <tr><td>139.7552</td><td>161.9888</td><td>165.5346</td></tr> <tr><td>178.3697</td><td>206.3680</td><td>213.3269</td></tr> <tr><td>221.3672</td><td>245.6592</td><td>247.0890</td></tr> <tr><td>261.8036</td><td>264.7102</td><td>270.4847</td></tr> <tr><td>277.5364</td><td>301.3189</td><td>307.8430</td></tr> <tr><td>337.5945</td><td>342.4677</td><td>351.4730</td></tr> <tr><td>364.2098</td><td>378.2011</td><td>387.1523</td></tr> <tr><td>402.9772</td><td>405.1126</td><td>406.6595</td></tr> <tr><td>426.2320</td><td>432.7669</td><td>445.1495</td></tr> <tr><td>461.5510</td><td>463.3214</td><td>472.3148</td></tr> <tr><td>481.5588</td><td>485.9094</td><td>489.7265</td></tr> <tr><td>492.3358</td><td>528.4799</td><td>534.0252</td></tr> <tr><td>543.0274</td><td>548.1491</td><td>556.0428</td></tr> <tr><td>584.3807</td><td>587.8725</td><td>590.3771</td></tr> <tr><td>593.9477</td><td>598.9039</td><td>601.9684</td></tr> <tr><td>620.4400</td><td>628.0745</td><td>631.6404</td></tr> <tr><td>675.4468</td><td>676.0546</td><td>683.1680</td></tr> <tr><td>688.8198</td><td>691.0311</td><td>711.0664</td></tr> <tr><td>712.3852</td><td>714.2980</td><td>725.5709</td></tr> <tr><td>732.6501</td><td>744.7709</td><td>755.1496</td></tr> <tr><td>756.8621</td><td>766.2415</td><td>771.9065</td></tr> <tr><td>780.3338</td><td>787.2608</td><td>816.2264</td></tr> <tr><td>819.0098</td><td>824.1680</td><td>829.5089</td></tr> <tr><td>841.9506</td><td>853.9786</td><td>855.4129</td></tr> <tr><td>857.3411</td><td>861.9852</td><td>864.8240</td></tr> <tr><td>871.0891</td><td>873.5452</td><td>880.1206</td></tr> <tr><td>905.8908</td><td>918.9185</td><td>930.9491</td></tr> <tr><td>940.1284</td><td>947.4639</td><td>950.4019</td></tr> <tr><td>959.8977</td><td>980.4387</td><td>981.4622</td></tr> <tr><td>992.1079</td><td>1006.3772</td><td>1008.5412</td></tr> <tr><td>1011.5502</td><td>1012.2399</td><td>1013.9406</td></tr> <tr><td>1015.2913</td><td>1018.4538</td><td>1020.2418</td></tr> <tr><td>1020.3967</td><td>1030.1176</td><td>1032.5794</td></tr> </tbody> </table> | -713.6423 | 9.8729 | 25.8497 | 28.5252 | 39.7924 | 50.5448 | 54.1918 | 62.4594 | 69.8988 | 77.0474 | 97.4742 | 104.3999 | 108.8623 | 114.9102 | 128.5425 | 139.7552 | 161.9888 | 165.5346 | 178.3697 | 206.3680 | 213.3269 | 221.3672 | 245.6592 | 247.0890 | 261.8036 | 264.7102 | 270.4847 | 277.5364 | 301.3189 | 307.8430 | 337.5945 | 342.4677 | 351.4730 | 364.2098 | 378.2011 | 387.1523 | 402.9772 | 405.1126 | 406.6595 | 426.2320 | 432.7669 | 445.1495 | 461.5510 | 463.3214 | 472.3148 | 481.5588 | 485.9094 | 489.7265 | 492.3358 | 528.4799 | 534.0252 | 543.0274 | 548.1491 | 556.0428 | 584.3807 | 587.8725 | 590.3771 | 593.9477 | 598.9039 | 601.9684 | 620.4400 | 628.0745 | 631.6404 | 675.4468 | 676.0546 | 683.1680 | 688.8198 | 691.0311 | 711.0664 | 712.3852 | 714.2980 | 725.5709 | 732.6501 | 744.7709 | 755.1496 | 756.8621 | 766.2415 | 771.9065 | 780.3338 | 787.2608 | 816.2264 | 819.0098 | 824.1680 | 829.5089 | 841.9506 | 853.9786 | 855.4129 | 857.3411 | 861.9852 | 864.8240 | 871.0891 | 873.5452 | 880.1206 | 905.8908 | 918.9185 | 930.9491 | 940.1284 | 947.4639 | 950.4019 | 959.8977 | 980.4387 | 981.4622 | 992.1079 | 1006.3772 | 1008.5412 | 1011.5502 | 1012.2399 | 1013.9406 | 1015.2913 | 1018.4538 | 1020.2418 | 1020.3967 | 1030.1176 | 1032.5794 |
| Atoms                                                                                                                                                                                                                                                                                                                                                                                                                                                                                                                                                                                                                                                                                                                                                                                                                                                                                                                                                                                                                                                                                                                                                                                                                                                                                                                                                                                                                                                                                                                                                                                                                                                                                                                                                                                                                                                                                                                                                                                                                                                                                                                                                                                                                                                                                                                                                                                                                                                                                                                                                                                                                                                                                           | X                                                                                 | Y                                                                                  | Z        |   |   |   |          |         |          |   |          |         |         |   |          |         |         |   |          |         |          |   |          |          |         |   |          |         |          |   |          |         |          |   |          |          |         |   |          |          |         |   |          |         |          |   |          |         |          |   |          |          |         |   |          |         |          |   |         |         |         |   |         |         |         |   |         |         |          |   |         |         |         |   |         |         |         |   |         |         |          |   |         |         |          |   |         |         |         |   |         |         |         |   |         |         |          |   |         |         |         |    |         |          |          |   |          |         |          |   |          |          |          |   |          |         |          |   |          |         |          |   |          |         |          |   |          |          |          |   |          |          |          |   |          |          |         |   |          |         |          |                                                                                                                                                                                                                                                                                                                                                                                                                                                                                                                                                                                                                                                                                                                                                                                                                                                                                                                                                                                                                                                                                                                                                                                                                                                                                                                                                                                                                                                                                                                                                                                                                                                                                                                                                                                                                                                                                                                                                                                                                                                                                                                                                                                                                                                                                                                                                                                                                                                                                                                   |           |        |         |         |         |         |         |         |         |         |         |          |          |          |          |          |          |          |          |          |          |          |          |          |          |          |          |          |          |          |          |          |          |          |          |          |          |          |          |          |          |          |          |          |          |          |          |          |          |          |          |          |          |          |          |          |          |          |          |          |          |          |          |          |          |          |          |          |          |          |          |          |          |          |          |          |          |          |          |          |          |          |          |          |          |          |          |          |          |          |          |          |          |          |          |          |          |          |          |          |          |          |          |           |           |           |           |           |           |           |           |           |           |           |
| N                                                                                                                                                                                                                                                                                                                                                                                                                                                                                                                                                                                                                                                                                                                                                                                                                                                                                                                                                                                                                                                                                                                                                                                                                                                                                                                                                                                                                                                                                                                                                                                                                                                                                                                                                                                                                                                                                                                                                                                                                                                                                                                                                                                                                                                                                                                                                                                                                                                                                                                                                                                                                                                                                               | -0.36540                                                                          | 1.54303                                                                            | -0.20810 |   |   |   |          |         |          |   |          |         |         |   |          |         |         |   |          |         |          |   |          |          |         |   |          |         |          |   |          |         |          |   |          |          |         |   |          |          |         |   |          |         |          |   |          |         |          |   |          |          |         |   |          |         |          |   |         |         |         |   |         |         |         |   |         |         |          |   |         |         |         |   |         |         |         |   |         |         |          |   |         |         |          |   |         |         |         |   |         |         |         |   |         |         |          |   |         |         |         |    |         |          |          |   |          |         |          |   |          |          |          |   |          |         |          |   |          |         |          |   |          |         |          |   |          |          |          |   |          |          |          |   |          |          |         |   |          |         |          |                                                                                                                                                                                                                                                                                                                                                                                                                                                                                                                                                                                                                                                                                                                                                                                                                                                                                                                                                                                                                                                                                                                                                                                                                                                                                                                                                                                                                                                                                                                                                                                                                                                                                                                                                                                                                                                                                                                                                                                                                                                                                                                                                                                                                                                                                                                                                                                                                                                                                                                   |           |        |         |         |         |         |         |         |         |         |         |          |          |          |          |          |          |          |          |          |          |          |          |          |          |          |          |          |          |          |          |          |          |          |          |          |          |          |          |          |          |          |          |          |          |          |          |          |          |          |          |          |          |          |          |          |          |          |          |          |          |          |          |          |          |          |          |          |          |          |          |          |          |          |          |          |          |          |          |          |          |          |          |          |          |          |          |          |          |          |          |          |          |          |          |          |          |          |          |          |          |          |          |           |           |           |           |           |           |           |           |           |           |           |
| N                                                                                                                                                                                                                                                                                                                                                                                                                                                                                                                                                                                                                                                                                                                                                                                                                                                                                                                                                                                                                                                                                                                                                                                                                                                                                                                                                                                                                                                                                                                                                                                                                                                                                                                                                                                                                                                                                                                                                                                                                                                                                                                                                                                                                                                                                                                                                                                                                                                                                                                                                                                                                                                                                               | -0.94090                                                                          | 0.62812                                                                            | 0.41698  |   |   |   |          |         |          |   |          |         |         |   |          |         |         |   |          |         |          |   |          |          |         |   |          |         |          |   |          |         |          |   |          |          |         |   |          |          |         |   |          |         |          |   |          |         |          |   |          |          |         |   |          |         |          |   |         |         |         |   |         |         |         |   |         |         |          |   |         |         |         |   |         |         |         |   |         |         |          |   |         |         |          |   |         |         |         |   |         |         |         |   |         |         |          |   |         |         |         |    |         |          |          |   |          |         |          |   |          |          |          |   |          |         |          |   |          |         |          |   |          |         |          |   |          |          |          |   |          |          |          |   |          |          |         |   |          |         |          |                                                                                                                                                                                                                                                                                                                                                                                                                                                                                                                                                                                                                                                                                                                                                                                                                                                                                                                                                                                                                                                                                                                                                                                                                                                                                                                                                                                                                                                                                                                                                                                                                                                                                                                                                                                                                                                                                                                                                                                                                                                                                                                                                                                                                                                                                                                                                                                                                                                                                                                   |           |        |         |         |         |         |         |         |         |         |         |          |          |          |          |          |          |          |          |          |          |          |          |          |          |          |          |          |          |          |          |          |          |          |          |          |          |          |          |          |          |          |          |          |          |          |          |          |          |          |          |          |          |          |          |          |          |          |          |          |          |          |          |          |          |          |          |          |          |          |          |          |          |          |          |          |          |          |          |          |          |          |          |          |          |          |          |          |          |          |          |          |          |          |          |          |          |          |          |          |          |          |          |           |           |           |           |           |           |           |           |           |           |           |
| C                                                                                                                                                                                                                                                                                                                                                                                                                                                                                                                                                                                                                                                                                                                                                                                                                                                                                                                                                                                                                                                                                                                                                                                                                                                                                                                                                                                                                                                                                                                                                                                                                                                                                                                                                                                                                                                                                                                                                                                                                                                                                                                                                                                                                                                                                                                                                                                                                                                                                                                                                                                                                                                                                               | -2.34640                                                                          | 0.54230                                                                            | 0.21341  |   |   |   |          |         |          |   |          |         |         |   |          |         |         |   |          |         |          |   |          |          |         |   |          |         |          |   |          |         |          |   |          |          |         |   |          |          |         |   |          |         |          |   |          |         |          |   |          |          |         |   |          |         |          |   |         |         |         |   |         |         |         |   |         |         |          |   |         |         |         |   |         |         |         |   |         |         |          |   |         |         |          |   |         |         |         |   |         |         |         |   |         |         |          |   |         |         |         |    |         |          |          |   |          |         |          |   |          |          |          |   |          |         |          |   |          |         |          |   |          |         |          |   |          |          |          |   |          |          |          |   |          |          |         |   |          |         |          |                                                                                                                                                                                                                                                                                                                                                                                                                                                                                                                                                                                                                                                                                                                                                                                                                                                                                                                                                                                                                                                                                                                                                                                                                                                                                                                                                                                                                                                                                                                                                                                                                                                                                                                                                                                                                                                                                                                                                                                                                                                                                                                                                                                                                                                                                                                                                                                                                                                                                                                   |           |        |         |         |         |         |         |         |         |         |         |          |          |          |          |          |          |          |          |          |          |          |          |          |          |          |          |          |          |          |          |          |          |          |          |          |          |          |          |          |          |          |          |          |          |          |          |          |          |          |          |          |          |          |          |          |          |          |          |          |          |          |          |          |          |          |          |          |          |          |          |          |          |          |          |          |          |          |          |          |          |          |          |          |          |          |          |          |          |          |          |          |          |          |          |          |          |          |          |          |          |          |          |           |           |           |           |           |           |           |           |           |           |           |
| C                                                                                                                                                                                                                                                                                                                                                                                                                                                                                                                                                                                                                                                                                                                                                                                                                                                                                                                                                                                                                                                                                                                                                                                                                                                                                                                                                                                                                                                                                                                                                                                                                                                                                                                                                                                                                                                                                                                                                                                                                                                                                                                                                                                                                                                                                                                                                                                                                                                                                                                                                                                                                                                                                               | -3.06482                                                                          | 1.38661                                                                            | -0.64205 |   |   |   |          |         |          |   |          |         |         |   |          |         |         |   |          |         |          |   |          |          |         |   |          |         |          |   |          |         |          |   |          |          |         |   |          |          |         |   |          |         |          |   |          |         |          |   |          |          |         |   |          |         |          |   |         |         |         |   |         |         |         |   |         |         |          |   |         |         |         |   |         |         |         |   |         |         |          |   |         |         |          |   |         |         |         |   |         |         |         |   |         |         |          |   |         |         |         |    |         |          |          |   |          |         |          |   |          |          |          |   |          |         |          |   |          |         |          |   |          |         |          |   |          |          |          |   |          |          |          |   |          |          |         |   |          |         |          |                                                                                                                                                                                                                                                                                                                                                                                                                                                                                                                                                                                                                                                                                                                                                                                                                                                                                                                                                                                                                                                                                                                                                                                                                                                                                                                                                                                                                                                                                                                                                                                                                                                                                                                                                                                                                                                                                                                                                                                                                                                                                                                                                                                                                                                                                                                                                                                                                                                                                                                   |           |        |         |         |         |         |         |         |         |         |         |          |          |          |          |          |          |          |          |          |          |          |          |          |          |          |          |          |          |          |          |          |          |          |          |          |          |          |          |          |          |          |          |          |          |          |          |          |          |          |          |          |          |          |          |          |          |          |          |          |          |          |          |          |          |          |          |          |          |          |          |          |          |          |          |          |          |          |          |          |          |          |          |          |          |          |          |          |          |          |          |          |          |          |          |          |          |          |          |          |          |          |          |           |           |           |           |           |           |           |           |           |           |           |
| C                                                                                                                                                                                                                                                                                                                                                                                                                                                                                                                                                                                                                                                                                                                                                                                                                                                                                                                                                                                                                                                                                                                                                                                                                                                                                                                                                                                                                                                                                                                                                                                                                                                                                                                                                                                                                                                                                                                                                                                                                                                                                                                                                                                                                                                                                                                                                                                                                                                                                                                                                                                                                                                                                               | -2.99530                                                                          | -0.46633                                                                           | 0.92784  |   |   |   |          |         |          |   |          |         |         |   |          |         |         |   |          |         |          |   |          |          |         |   |          |         |          |   |          |         |          |   |          |          |         |   |          |          |         |   |          |         |          |   |          |         |          |   |          |          |         |   |          |         |          |   |         |         |         |   |         |         |         |   |         |         |          |   |         |         |         |   |         |         |         |   |         |         |          |   |         |         |          |   |         |         |         |   |         |         |         |   |         |         |          |   |         |         |         |    |         |          |          |   |          |         |          |   |          |          |          |   |          |         |          |   |          |         |          |   |          |         |          |   |          |          |          |   |          |          |          |   |          |          |         |   |          |         |          |                                                                                                                                                                                                                                                                                                                                                                                                                                                                                                                                                                                                                                                                                                                                                                                                                                                                                                                                                                                                                                                                                                                                                                                                                                                                                                                                                                                                                                                                                                                                                                                                                                                                                                                                                                                                                                                                                                                                                                                                                                                                                                                                                                                                                                                                                                                                                                                                                                                                                                                   |           |        |         |         |         |         |         |         |         |         |         |          |          |          |          |          |          |          |          |          |          |          |          |          |          |          |          |          |          |          |          |          |          |          |          |          |          |          |          |          |          |          |          |          |          |          |          |          |          |          |          |          |          |          |          |          |          |          |          |          |          |          |          |          |          |          |          |          |          |          |          |          |          |          |          |          |          |          |          |          |          |          |          |          |          |          |          |          |          |          |          |          |          |          |          |          |          |          |          |          |          |          |          |           |           |           |           |           |           |           |           |           |           |           |
| C                                                                                                                                                                                                                                                                                                                                                                                                                                                                                                                                                                                                                                                                                                                                                                                                                                                                                                                                                                                                                                                                                                                                                                                                                                                                                                                                                                                                                                                                                                                                                                                                                                                                                                                                                                                                                                                                                                                                                                                                                                                                                                                                                                                                                                                                                                                                                                                                                                                                                                                                                                                                                                                                                               | -4.43204                                                                          | 1.20114                                                                            | -0.77872 |   |   |   |          |         |          |   |          |         |         |   |          |         |         |   |          |         |          |   |          |          |         |   |          |         |          |   |          |         |          |   |          |          |         |   |          |          |         |   |          |         |          |   |          |         |          |   |          |          |         |   |          |         |          |   |         |         |         |   |         |         |         |   |         |         |          |   |         |         |         |   |         |         |         |   |         |         |          |   |         |         |          |   |         |         |         |   |         |         |         |   |         |         |          |   |         |         |         |    |         |          |          |   |          |         |          |   |          |          |          |   |          |         |          |   |          |         |          |   |          |         |          |   |          |          |          |   |          |          |          |   |          |          |         |   |          |         |          |                                                                                                                                                                                                                                                                                                                                                                                                                                                                                                                                                                                                                                                                                                                                                                                                                                                                                                                                                                                                                                                                                                                                                                                                                                                                                                                                                                                                                                                                                                                                                                                                                                                                                                                                                                                                                                                                                                                                                                                                                                                                                                                                                                                                                                                                                                                                                                                                                                                                                                                   |           |        |         |         |         |         |         |         |         |         |         |          |          |          |          |          |          |          |          |          |          |          |          |          |          |          |          |          |          |          |          |          |          |          |          |          |          |          |          |          |          |          |          |          |          |          |          |          |          |          |          |          |          |          |          |          |          |          |          |          |          |          |          |          |          |          |          |          |          |          |          |          |          |          |          |          |          |          |          |          |          |          |          |          |          |          |          |          |          |          |          |          |          |          |          |          |          |          |          |          |          |          |          |           |           |           |           |           |           |           |           |           |           |           |
| H                                                                                                                                                                                                                                                                                                                                                                                                                                                                                                                                                                                                                                                                                                                                                                                                                                                                                                                                                                                                                                                                                                                                                                                                                                                                                                                                                                                                                                                                                                                                                                                                                                                                                                                                                                                                                                                                                                                                                                                                                                                                                                                                                                                                                                                                                                                                                                                                                                                                                                                                                                                                                                                                                               | -2.54390                                                                          | 2.17073                                                                            | -1.17886 |   |   |   |          |         |          |   |          |         |         |   |          |         |         |   |          |         |          |   |          |          |         |   |          |         |          |   |          |         |          |   |          |          |         |   |          |          |         |   |          |         |          |   |          |         |          |   |          |          |         |   |          |         |          |   |         |         |         |   |         |         |         |   |         |         |          |   |         |         |         |   |         |         |         |   |         |         |          |   |         |         |          |   |         |         |         |   |         |         |         |   |         |         |          |   |         |         |         |    |         |          |          |   |          |         |          |   |          |          |          |   |          |         |          |   |          |         |          |   |          |         |          |   |          |          |          |   |          |          |          |   |          |          |         |   |          |         |          |                                                                                                                                                                                                                                                                                                                                                                                                                                                                                                                                                                                                                                                                                                                                                                                                                                                                                                                                                                                                                                                                                                                                                                                                                                                                                                                                                                                                                                                                                                                                                                                                                                                                                                                                                                                                                                                                                                                                                                                                                                                                                                                                                                                                                                                                                                                                                                                                                                                                                                                   |           |        |         |         |         |         |         |         |         |         |         |          |          |          |          |          |          |          |          |          |          |          |          |          |          |          |          |          |          |          |          |          |          |          |          |          |          |          |          |          |          |          |          |          |          |          |          |          |          |          |          |          |          |          |          |          |          |          |          |          |          |          |          |          |          |          |          |          |          |          |          |          |          |          |          |          |          |          |          |          |          |          |          |          |          |          |          |          |          |          |          |          |          |          |          |          |          |          |          |          |          |          |          |           |           |           |           |           |           |           |           |           |           |           |
| C                                                                                                                                                                                                                                                                                                                                                                                                                                                                                                                                                                                                                                                                                                                                                                                                                                                                                                                                                                                                                                                                                                                                                                                                                                                                                                                                                                                                                                                                                                                                                                                                                                                                                                                                                                                                                                                                                                                                                                                                                                                                                                                                                                                                                                                                                                                                                                                                                                                                                                                                                                                                                                                                                               | -4.36764                                                                          | -0.64278                                                                           | 0.78822  |   |   |   |          |         |          |   |          |         |         |   |          |         |         |   |          |         |          |   |          |          |         |   |          |         |          |   |          |         |          |   |          |          |         |   |          |          |         |   |          |         |          |   |          |         |          |   |          |          |         |   |          |         |          |   |         |         |         |   |         |         |         |   |         |         |          |   |         |         |         |   |         |         |         |   |         |         |          |   |         |         |          |   |         |         |         |   |         |         |         |   |         |         |          |   |         |         |         |    |         |          |          |   |          |         |          |   |          |          |          |   |          |         |          |   |          |         |          |   |          |         |          |   |          |          |          |   |          |          |          |   |          |          |         |   |          |         |          |                                                                                                                                                                                                                                                                                                                                                                                                                                                                                                                                                                                                                                                                                                                                                                                                                                                                                                                                                                                                                                                                                                                                                                                                                                                                                                                                                                                                                                                                                                                                                                                                                                                                                                                                                                                                                                                                                                                                                                                                                                                                                                                                                                                                                                                                                                                                                                                                                                                                                                                   |           |        |         |         |         |         |         |         |         |         |         |          |          |          |          |          |          |          |          |          |          |          |          |          |          |          |          |          |          |          |          |          |          |          |          |          |          |          |          |          |          |          |          |          |          |          |          |          |          |          |          |          |          |          |          |          |          |          |          |          |          |          |          |          |          |          |          |          |          |          |          |          |          |          |          |          |          |          |          |          |          |          |          |          |          |          |          |          |          |          |          |          |          |          |          |          |          |          |          |          |          |          |          |           |           |           |           |           |           |           |           |           |           |           |
| H                                                                                                                                                                                                                                                                                                                                                                                                                                                                                                                                                                                                                                                                                                                                                                                                                                                                                                                                                                                                                                                                                                                                                                                                                                                                                                                                                                                                                                                                                                                                                                                                                                                                                                                                                                                                                                                                                                                                                                                                                                                                                                                                                                                                                                                                                                                                                                                                                                                                                                                                                                                                                                                                                               | -2.41579                                                                          | -1.08523                                                                           | 1.60713  |   |   |   |          |         |          |   |          |         |         |   |          |         |         |   |          |         |          |   |          |          |         |   |          |         |          |   |          |         |          |   |          |          |         |   |          |          |         |   |          |         |          |   |          |         |          |   |          |          |         |   |          |         |          |   |         |         |         |   |         |         |         |   |         |         |          |   |         |         |         |   |         |         |         |   |         |         |          |   |         |         |          |   |         |         |         |   |         |         |         |   |         |         |          |   |         |         |         |    |         |          |          |   |          |         |          |   |          |          |          |   |          |         |          |   |          |         |          |   |          |         |          |   |          |          |          |   |          |          |          |   |          |          |         |   |          |         |          |                                                                                                                                                                                                                                                                                                                                                                                                                                                                                                                                                                                                                                                                                                                                                                                                                                                                                                                                                                                                                                                                                                                                                                                                                                                                                                                                                                                                                                                                                                                                                                                                                                                                                                                                                                                                                                                                                                                                                                                                                                                                                                                                                                                                                                                                                                                                                                                                                                                                                                                   |           |        |         |         |         |         |         |         |         |         |         |          |          |          |          |          |          |          |          |          |          |          |          |          |          |          |          |          |          |          |          |          |          |          |          |          |          |          |          |          |          |          |          |          |          |          |          |          |          |          |          |          |          |          |          |          |          |          |          |          |          |          |          |          |          |          |          |          |          |          |          |          |          |          |          |          |          |          |          |          |          |          |          |          |          |          |          |          |          |          |          |          |          |          |          |          |          |          |          |          |          |          |          |           |           |           |           |           |           |           |           |           |           |           |
| C                                                                                                                                                                                                                                                                                                                                                                                                                                                                                                                                                                                                                                                                                                                                                                                                                                                                                                                                                                                                                                                                                                                                                                                                                                                                                                                                                                                                                                                                                                                                                                                                                                                                                                                                                                                                                                                                                                                                                                                                                                                                                                                                                                                                                                                                                                                                                                                                                                                                                                                                                                                                                                                                                               | -5.08375                                                                          | 0.18956                                                                            | -0.06765 |   |   |   |          |         |          |   |          |         |         |   |          |         |         |   |          |         |          |   |          |          |         |   |          |         |          |   |          |         |          |   |          |          |         |   |          |          |         |   |          |         |          |   |          |         |          |   |          |          |         |   |          |         |          |   |         |         |         |   |         |         |         |   |         |         |          |   |         |         |         |   |         |         |         |   |         |         |          |   |         |         |          |   |         |         |         |   |         |         |         |   |         |         |          |   |         |         |         |    |         |          |          |   |          |         |          |   |          |          |          |   |          |         |          |   |          |         |          |   |          |         |          |   |          |          |          |   |          |          |          |   |          |          |         |   |          |         |          |                                                                                                                                                                                                                                                                                                                                                                                                                                                                                                                                                                                                                                                                                                                                                                                                                                                                                                                                                                                                                                                                                                                                                                                                                                                                                                                                                                                                                                                                                                                                                                                                                                                                                                                                                                                                                                                                                                                                                                                                                                                                                                                                                                                                                                                                                                                                                                                                                                                                                                                   |           |        |         |         |         |         |         |         |         |         |         |          |          |          |          |          |          |          |          |          |          |          |          |          |          |          |          |          |          |          |          |          |          |          |          |          |          |          |          |          |          |          |          |          |          |          |          |          |          |          |          |          |          |          |          |          |          |          |          |          |          |          |          |          |          |          |          |          |          |          |          |          |          |          |          |          |          |          |          |          |          |          |          |          |          |          |          |          |          |          |          |          |          |          |          |          |          |          |          |          |          |          |          |           |           |           |           |           |           |           |           |           |           |           |
| H                                                                                                                                                                                                                                                                                                                                                                                                                                                                                                                                                                                                                                                                                                                                                                                                                                                                                                                                                                                                                                                                                                                                                                                                                                                                                                                                                                                                                                                                                                                                                                                                                                                                                                                                                                                                                                                                                                                                                                                                                                                                                                                                                                                                                                                                                                                                                                                                                                                                                                                                                                                                                                                                                               | -5.00017                                                                          | 1.84900                                                                            | -1.43752 |   |   |   |          |         |          |   |          |         |         |   |          |         |         |   |          |         |          |   |          |          |         |   |          |         |          |   |          |         |          |   |          |          |         |   |          |          |         |   |          |         |          |   |          |         |          |   |          |          |         |   |          |         |          |   |         |         |         |   |         |         |         |   |         |         |          |   |         |         |         |   |         |         |         |   |         |         |          |   |         |         |          |   |         |         |         |   |         |         |         |   |         |         |          |   |         |         |         |    |         |          |          |   |          |         |          |   |          |          |          |   |          |         |          |   |          |         |          |   |          |         |          |   |          |          |          |   |          |          |          |   |          |          |         |   |          |         |          |                                                                                                                                                                                                                                                                                                                                                                                                                                                                                                                                                                                                                                                                                                                                                                                                                                                                                                                                                                                                                                                                                                                                                                                                                                                                                                                                                                                                                                                                                                                                                                                                                                                                                                                                                                                                                                                                                                                                                                                                                                                                                                                                                                                                                                                                                                                                                                                                                                                                                                                   |           |        |         |         |         |         |         |         |         |         |         |          |          |          |          |          |          |          |          |          |          |          |          |          |          |          |          |          |          |          |          |          |          |          |          |          |          |          |          |          |          |          |          |          |          |          |          |          |          |          |          |          |          |          |          |          |          |          |          |          |          |          |          |          |          |          |          |          |          |          |          |          |          |          |          |          |          |          |          |          |          |          |          |          |          |          |          |          |          |          |          |          |          |          |          |          |          |          |          |          |          |          |          |           |           |           |           |           |           |           |           |           |           |           |
| H                                                                                                                                                                                                                                                                                                                                                                                                                                                                                                                                                                                                                                                                                                                                                                                                                                                                                                                                                                                                                                                                                                                                                                                                                                                                                                                                                                                                                                                                                                                                                                                                                                                                                                                                                                                                                                                                                                                                                                                                                                                                                                                                                                                                                                                                                                                                                                                                                                                                                                                                                                                                                                                                                               | -4.87690                                                                          | -1.41985                                                                           | 1.34743  |   |   |   |          |         |          |   |          |         |         |   |          |         |         |   |          |         |          |   |          |          |         |   |          |         |          |   |          |         |          |   |          |          |         |   |          |          |         |   |          |         |          |   |          |         |          |   |          |          |         |   |          |         |          |   |         |         |         |   |         |         |         |   |         |         |          |   |         |         |         |   |         |         |         |   |         |         |          |   |         |         |          |   |         |         |         |   |         |         |         |   |         |         |          |   |         |         |         |    |         |          |          |   |          |         |          |   |          |          |          |   |          |         |          |   |          |         |          |   |          |         |          |   |          |          |          |   |          |          |          |   |          |          |         |   |          |         |          |                                                                                                                                                                                                                                                                                                                                                                                                                                                                                                                                                                                                                                                                                                                                                                                                                                                                                                                                                                                                                                                                                                                                                                                                                                                                                                                                                                                                                                                                                                                                                                                                                                                                                                                                                                                                                                                                                                                                                                                                                                                                                                                                                                                                                                                                                                                                                                                                                                                                                                                   |           |        |         |         |         |         |         |         |         |         |         |          |          |          |          |          |          |          |          |          |          |          |          |          |          |          |          |          |          |          |          |          |          |          |          |          |          |          |          |          |          |          |          |          |          |          |          |          |          |          |          |          |          |          |          |          |          |          |          |          |          |          |          |          |          |          |          |          |          |          |          |          |          |          |          |          |          |          |          |          |          |          |          |          |          |          |          |          |          |          |          |          |          |          |          |          |          |          |          |          |          |          |          |           |           |           |           |           |           |           |           |           |           |           |
| H                                                                                                                                                                                                                                                                                                                                                                                                                                                                                                                                                                                                                                                                                                                                                                                                                                                                                                                                                                                                                                                                                                                                                                                                                                                                                                                                                                                                                                                                                                                                                                                                                                                                                                                                                                                                                                                                                                                                                                                                                                                                                                                                                                                                                                                                                                                                                                                                                                                                                                                                                                                                                                                                                               | -6.15469                                                                          | 0.05672                                                                            | -0.17966 |   |   |   |          |         |          |   |          |         |         |   |          |         |         |   |          |         |          |   |          |          |         |   |          |         |          |   |          |         |          |   |          |          |         |   |          |          |         |   |          |         |          |   |          |         |          |   |          |          |         |   |          |         |          |   |         |         |         |   |         |         |         |   |         |         |          |   |         |         |         |   |         |         |         |   |         |         |          |   |         |         |          |   |         |         |         |   |         |         |         |   |         |         |          |   |         |         |         |    |         |          |          |   |          |         |          |   |          |          |          |   |          |         |          |   |          |         |          |   |          |         |          |   |          |          |          |   |          |          |          |   |          |          |         |   |          |         |          |                                                                                                                                                                                                                                                                                                                                                                                                                                                                                                                                                                                                                                                                                                                                                                                                                                                                                                                                                                                                                                                                                                                                                                                                                                                                                                                                                                                                                                                                                                                                                                                                                                                                                                                                                                                                                                                                                                                                                                                                                                                                                                                                                                                                                                                                                                                                                                                                                                                                                                                   |           |        |         |         |         |         |         |         |         |         |         |          |          |          |          |          |          |          |          |          |          |          |          |          |          |          |          |          |          |          |          |          |          |          |          |          |          |          |          |          |          |          |          |          |          |          |          |          |          |          |          |          |          |          |          |          |          |          |          |          |          |          |          |          |          |          |          |          |          |          |          |          |          |          |          |          |          |          |          |          |          |          |          |          |          |          |          |          |          |          |          |          |          |          |          |          |          |          |          |          |          |          |          |           |           |           |           |           |           |           |           |           |           |           |
| C                                                                                                                                                                                                                                                                                                                                                                                                                                                                                                                                                                                                                                                                                                                                                                                                                                                                                                                                                                                                                                                                                                                                                                                                                                                                                                                                                                                                                                                                                                                                                                                                                                                                                                                                                                                                                                                                                                                                                                                                                                                                                                                                                                                                                                                                                                                                                                                                                                                                                                                                                                                                                                                                                               | 1.03275                                                                           | 1.60972                                                                            | 0.04286  |   |   |   |          |         |          |   |          |         |         |   |          |         |         |   |          |         |          |   |          |          |         |   |          |         |          |   |          |         |          |   |          |          |         |   |          |          |         |   |          |         |          |   |          |         |          |   |          |          |         |   |          |         |          |   |         |         |         |   |         |         |         |   |         |         |          |   |         |         |         |   |         |         |         |   |         |         |          |   |         |         |          |   |         |         |         |   |         |         |         |   |         |         |          |   |         |         |         |    |         |          |          |   |          |         |          |   |          |          |          |   |          |         |          |   |          |         |          |   |          |         |          |   |          |          |          |   |          |          |          |   |          |          |         |   |          |         |          |                                                                                                                                                                                                                                                                                                                                                                                                                                                                                                                                                                                                                                                                                                                                                                                                                                                                                                                                                                                                                                                                                                                                                                                                                                                                                                                                                                                                                                                                                                                                                                                                                                                                                                                                                                                                                                                                                                                                                                                                                                                                                                                                                                                                                                                                                                                                                                                                                                                                                                                   |           |        |         |         |         |         |         |         |         |         |         |          |          |          |          |          |          |          |          |          |          |          |          |          |          |          |          |          |          |          |          |          |          |          |          |          |          |          |          |          |          |          |          |          |          |          |          |          |          |          |          |          |          |          |          |          |          |          |          |          |          |          |          |          |          |          |          |          |          |          |          |          |          |          |          |          |          |          |          |          |          |          |          |          |          |          |          |          |          |          |          |          |          |          |          |          |          |          |          |          |          |          |          |           |           |           |           |           |           |           |           |           |           |           |
| C                                                                                                                                                                                                                                                                                                                                                                                                                                                                                                                                                                                                                                                                                                                                                                                                                                                                                                                                                                                                                                                                                                                                                                                                                                                                                                                                                                                                                                                                                                                                                                                                                                                                                                                                                                                                                                                                                                                                                                                                                                                                                                                                                                                                                                                                                                                                                                                                                                                                                                                                                                                                                                                                                               | 1.58869                                                                           | 1.31970                                                                            | 1.29532  |   |   |   |          |         |          |   |          |         |         |   |          |         |         |   |          |         |          |   |          |          |         |   |          |         |          |   |          |         |          |   |          |          |         |   |          |          |         |   |          |         |          |   |          |         |          |   |          |          |         |   |          |         |          |   |         |         |         |   |         |         |         |   |         |         |          |   |         |         |         |   |         |         |         |   |         |         |          |   |         |         |          |   |         |         |         |   |         |         |         |   |         |         |          |   |         |         |         |    |         |          |          |   |          |         |          |   |          |          |          |   |          |         |          |   |          |         |          |   |          |         |          |   |          |          |          |   |          |          |          |   |          |          |         |   |          |         |          |                                                                                                                                                                                                                                                                                                                                                                                                                                                                                                                                                                                                                                                                                                                                                                                                                                                                                                                                                                                                                                                                                                                                                                                                                                                                                                                                                                                                                                                                                                                                                                                                                                                                                                                                                                                                                                                                                                                                                                                                                                                                                                                                                                                                                                                                                                                                                                                                                                                                                                                   |           |        |         |         |         |         |         |         |         |         |         |          |          |          |          |          |          |          |          |          |          |          |          |          |          |          |          |          |          |          |          |          |          |          |          |          |          |          |          |          |          |          |          |          |          |          |          |          |          |          |          |          |          |          |          |          |          |          |          |          |          |          |          |          |          |          |          |          |          |          |          |          |          |          |          |          |          |          |          |          |          |          |          |          |          |          |          |          |          |          |          |          |          |          |          |          |          |          |          |          |          |          |          |           |           |           |           |           |           |           |           |           |           |           |
| C                                                                                                                                                                                                                                                                                                                                                                                                                                                                                                                                                                                                                                                                                                                                                                                                                                                                                                                                                                                                                                                                                                                                                                                                                                                                                                                                                                                                                                                                                                                                                                                                                                                                                                                                                                                                                                                                                                                                                                                                                                                                                                                                                                                                                                                                                                                                                                                                                                                                                                                                                                                                                                                                                               | 1.84875                                                                           | 1.98202                                                                            | -1.02740 |   |   |   |          |         |          |   |          |         |         |   |          |         |         |   |          |         |          |   |          |          |         |   |          |         |          |   |          |         |          |   |          |          |         |   |          |          |         |   |          |         |          |   |          |         |          |   |          |          |         |   |          |         |          |   |         |         |         |   |         |         |         |   |         |         |          |   |         |         |         |   |         |         |         |   |         |         |          |   |         |         |          |   |         |         |         |   |         |         |         |   |         |         |          |   |         |         |         |    |         |          |          |   |          |         |          |   |          |          |          |   |          |         |          |   |          |         |          |   |          |         |          |   |          |          |          |   |          |          |          |   |          |          |         |   |          |         |          |                                                                                                                                                                                                                                                                                                                                                                                                                                                                                                                                                                                                                                                                                                                                                                                                                                                                                                                                                                                                                                                                                                                                                                                                                                                                                                                                                                                                                                                                                                                                                                                                                                                                                                                                                                                                                                                                                                                                                                                                                                                                                                                                                                                                                                                                                                                                                                                                                                                                                                                   |           |        |         |         |         |         |         |         |         |         |         |          |          |          |          |          |          |          |          |          |          |          |          |          |          |          |          |          |          |          |          |          |          |          |          |          |          |          |          |          |          |          |          |          |          |          |          |          |          |          |          |          |          |          |          |          |          |          |          |          |          |          |          |          |          |          |          |          |          |          |          |          |          |          |          |          |          |          |          |          |          |          |          |          |          |          |          |          |          |          |          |          |          |          |          |          |          |          |          |          |          |          |          |           |           |           |           |           |           |           |           |           |           |           |
| C                                                                                                                                                                                                                                                                                                                                                                                                                                                                                                                                                                                                                                                                                                                                                                                                                                                                                                                                                                                                                                                                                                                                                                                                                                                                                                                                                                                                                                                                                                                                                                                                                                                                                                                                                                                                                                                                                                                                                                                                                                                                                                                                                                                                                                                                                                                                                                                                                                                                                                                                                                                                                                                                                               | 2.97003                                                                           | 1.36227                                                                            | 1.45493  |   |   |   |          |         |          |   |          |         |         |   |          |         |         |   |          |         |          |   |          |          |         |   |          |         |          |   |          |         |          |   |          |          |         |   |          |          |         |   |          |         |          |   |          |         |          |   |          |          |         |   |          |         |          |   |         |         |         |   |         |         |         |   |         |         |          |   |         |         |         |   |         |         |         |   |         |         |          |   |         |         |          |   |         |         |         |   |         |         |         |   |         |         |          |   |         |         |         |    |         |          |          |   |          |         |          |   |          |          |          |   |          |         |          |   |          |         |          |   |          |         |          |   |          |          |          |   |          |          |          |   |          |          |         |   |          |         |          |                                                                                                                                                                                                                                                                                                                                                                                                                                                                                                                                                                                                                                                                                                                                                                                                                                                                                                                                                                                                                                                                                                                                                                                                                                                                                                                                                                                                                                                                                                                                                                                                                                                                                                                                                                                                                                                                                                                                                                                                                                                                                                                                                                                                                                                                                                                                                                                                                                                                                                                   |           |        |         |         |         |         |         |         |         |         |         |          |          |          |          |          |          |          |          |          |          |          |          |          |          |          |          |          |          |          |          |          |          |          |          |          |          |          |          |          |          |          |          |          |          |          |          |          |          |          |          |          |          |          |          |          |          |          |          |          |          |          |          |          |          |          |          |          |          |          |          |          |          |          |          |          |          |          |          |          |          |          |          |          |          |          |          |          |          |          |          |          |          |          |          |          |          |          |          |          |          |          |          |           |           |           |           |           |           |           |           |           |           |           |
| H                                                                                                                                                                                                                                                                                                                                                                                                                                                                                                                                                                                                                                                                                                                                                                                                                                                                                                                                                                                                                                                                                                                                                                                                                                                                                                                                                                                                                                                                                                                                                                                                                                                                                                                                                                                                                                                                                                                                                                                                                                                                                                                                                                                                                                                                                                                                                                                                                                                                                                                                                                                                                                                                                               | 0.92854                                                                           | 1.09680                                                                            | 2.12790  |   |   |   |          |         |          |   |          |         |         |   |          |         |         |   |          |         |          |   |          |          |         |   |          |         |          |   |          |         |          |   |          |          |         |   |          |          |         |   |          |         |          |   |          |         |          |   |          |          |         |   |          |         |          |   |         |         |         |   |         |         |         |   |         |         |          |   |         |         |         |   |         |         |         |   |         |         |          |   |         |         |          |   |         |         |         |   |         |         |         |   |         |         |          |   |         |         |         |    |         |          |          |   |          |         |          |   |          |          |          |   |          |         |          |   |          |         |          |   |          |         |          |   |          |          |          |   |          |          |          |   |          |          |         |   |          |         |          |                                                                                                                                                                                                                                                                                                                                                                                                                                                                                                                                                                                                                                                                                                                                                                                                                                                                                                                                                                                                                                                                                                                                                                                                                                                                                                                                                                                                                                                                                                                                                                                                                                                                                                                                                                                                                                                                                                                                                                                                                                                                                                                                                                                                                                                                                                                                                                                                                                                                                                                   |           |        |         |         |         |         |         |         |         |         |         |          |          |          |          |          |          |          |          |          |          |          |          |          |          |          |          |          |          |          |          |          |          |          |          |          |          |          |          |          |          |          |          |          |          |          |          |          |          |          |          |          |          |          |          |          |          |          |          |          |          |          |          |          |          |          |          |          |          |          |          |          |          |          |          |          |          |          |          |          |          |          |          |          |          |          |          |          |          |          |          |          |          |          |          |          |          |          |          |          |          |          |          |           |           |           |           |           |           |           |           |           |           |           |
| C                                                                                                                                                                                                                                                                                                                                                                                                                                                                                                                                                                                                                                                                                                                                                                                                                                                                                                                                                                                                                                                                                                                                                                                                                                                                                                                                                                                                                                                                                                                                                                                                                                                                                                                                                                                                                                                                                                                                                                                                                                                                                                                                                                                                                                                                                                                                                                                                                                                                                                                                                                                                                                                                                               | 3.23170                                                                           | 1.99738                                                                            | -0.86467 |   |   |   |          |         |          |   |          |         |         |   |          |         |         |   |          |         |          |   |          |          |         |   |          |         |          |   |          |         |          |   |          |          |         |   |          |          |         |   |          |         |          |   |          |         |          |   |          |          |         |   |          |         |          |   |         |         |         |   |         |         |         |   |         |         |          |   |         |         |         |   |         |         |         |   |         |         |          |   |         |         |          |   |         |         |         |   |         |         |         |   |         |         |          |   |         |         |         |    |         |          |          |   |          |         |          |   |          |          |          |   |          |         |          |   |          |         |          |   |          |         |          |   |          |          |          |   |          |          |          |   |          |          |         |   |          |         |          |                                                                                                                                                                                                                                                                                                                                                                                                                                                                                                                                                                                                                                                                                                                                                                                                                                                                                                                                                                                                                                                                                                                                                                                                                                                                                                                                                                                                                                                                                                                                                                                                                                                                                                                                                                                                                                                                                                                                                                                                                                                                                                                                                                                                                                                                                                                                                                                                                                                                                                                   |           |        |         |         |         |         |         |         |         |         |         |          |          |          |          |          |          |          |          |          |          |          |          |          |          |          |          |          |          |          |          |          |          |          |          |          |          |          |          |          |          |          |          |          |          |          |          |          |          |          |          |          |          |          |          |          |          |          |          |          |          |          |          |          |          |          |          |          |          |          |          |          |          |          |          |          |          |          |          |          |          |          |          |          |          |          |          |          |          |          |          |          |          |          |          |          |          |          |          |          |          |          |          |           |           |           |           |           |           |           |           |           |           |           |
| H                                                                                                                                                                                                                                                                                                                                                                                                                                                                                                                                                                                                                                                                                                                                                                                                                                                                                                                                                                                                                                                                                                                                                                                                                                                                                                                                                                                                                                                                                                                                                                                                                                                                                                                                                                                                                                                                                                                                                                                                                                                                                                                                                                                                                                                                                                                                                                                                                                                                                                                                                                                                                                                                                               | 1.38538                                                                           | 2.24928                                                                            | -1.97212 |   |   |   |          |         |          |   |          |         |         |   |          |         |         |   |          |         |          |   |          |          |         |   |          |         |          |   |          |         |          |   |          |          |         |   |          |          |         |   |          |         |          |   |          |         |          |   |          |          |         |   |          |         |          |   |         |         |         |   |         |         |         |   |         |         |          |   |         |         |         |   |         |         |         |   |         |         |          |   |         |         |          |   |         |         |         |   |         |         |         |   |         |         |          |   |         |         |         |    |         |          |          |   |          |         |          |   |          |          |          |   |          |         |          |   |          |         |          |   |          |         |          |   |          |          |          |   |          |          |          |   |          |          |         |   |          |         |          |                                                                                                                                                                                                                                                                                                                                                                                                                                                                                                                                                                                                                                                                                                                                                                                                                                                                                                                                                                                                                                                                                                                                                                                                                                                                                                                                                                                                                                                                                                                                                                                                                                                                                                                                                                                                                                                                                                                                                                                                                                                                                                                                                                                                                                                                                                                                                                                                                                                                                                                   |           |        |         |         |         |         |         |         |         |         |         |          |          |          |          |          |          |          |          |          |          |          |          |          |          |          |          |          |          |          |          |          |          |          |          |          |          |          |          |          |          |          |          |          |          |          |          |          |          |          |          |          |          |          |          |          |          |          |          |          |          |          |          |          |          |          |          |          |          |          |          |          |          |          |          |          |          |          |          |          |          |          |          |          |          |          |          |          |          |          |          |          |          |          |          |          |          |          |          |          |          |          |          |           |           |           |           |           |           |           |           |           |           |           |
| C                                                                                                                                                                                                                                                                                                                                                                                                                                                                                                                                                                                                                                                                                                                                                                                                                                                                                                                                                                                                                                                                                                                                                                                                                                                                                                                                                                                                                                                                                                                                                                                                                                                                                                                                                                                                                                                                                                                                                                                                                                                                                                                                                                                                                                                                                                                                                                                                                                                                                                                                                                                                                                                                                               | 3.79323                                                                           | 1.68392                                                                            | 0.37297  |   |   |   |          |         |          |   |          |         |         |   |          |         |         |   |          |         |          |   |          |          |         |   |          |         |          |   |          |         |          |   |          |          |         |   |          |          |         |   |          |         |          |   |          |         |          |   |          |          |         |   |          |         |          |   |         |         |         |   |         |         |         |   |         |         |          |   |         |         |         |   |         |         |         |   |         |         |          |   |         |         |          |   |         |         |         |   |         |         |         |   |         |         |          |   |         |         |         |    |         |          |          |   |          |         |          |   |          |          |          |   |          |         |          |   |          |         |          |   |          |         |          |   |          |          |          |   |          |          |          |   |          |          |         |   |          |         |          |                                                                                                                                                                                                                                                                                                                                                                                                                                                                                                                                                                                                                                                                                                                                                                                                                                                                                                                                                                                                                                                                                                                                                                                                                                                                                                                                                                                                                                                                                                                                                                                                                                                                                                                                                                                                                                                                                                                                                                                                                                                                                                                                                                                                                                                                                                                                                                                                                                                                                                                   |           |        |         |         |         |         |         |         |         |         |         |          |          |          |          |          |          |          |          |          |          |          |          |          |          |          |          |          |          |          |          |          |          |          |          |          |          |          |          |          |          |          |          |          |          |          |          |          |          |          |          |          |          |          |          |          |          |          |          |          |          |          |          |          |          |          |          |          |          |          |          |          |          |          |          |          |          |          |          |          |          |          |          |          |          |          |          |          |          |          |          |          |          |          |          |          |          |          |          |          |          |          |          |           |           |           |           |           |           |           |           |           |           |           |
| H                                                                                                                                                                                                                                                                                                                                                                                                                                                                                                                                                                                                                                                                                                                                                                                                                                                                                                                                                                                                                                                                                                                                                                                                                                                                                                                                                                                                                                                                                                                                                                                                                                                                                                                                                                                                                                                                                                                                                                                                                                                                                                                                                                                                                                                                                                                                                                                                                                                                                                                                                                                                                                                                                               | 3.40717                                                                           | 1.16948                                                                            | 2.42960  |   |   |   |          |         |          |   |          |         |         |   |          |         |         |   |          |         |          |   |          |          |         |   |          |         |          |   |          |         |          |   |          |          |         |   |          |          |         |   |          |         |          |   |          |         |          |   |          |          |         |   |          |         |          |   |         |         |         |   |         |         |         |   |         |         |          |   |         |         |         |   |         |         |         |   |         |         |          |   |         |         |          |   |         |         |         |   |         |         |         |   |         |         |          |   |         |         |         |    |         |          |          |   |          |         |          |   |          |          |          |   |          |         |          |   |          |         |          |   |          |         |          |   |          |          |          |   |          |          |          |   |          |          |         |   |          |         |          |                                                                                                                                                                                                                                                                                                                                                                                                                                                                                                                                                                                                                                                                                                                                                                                                                                                                                                                                                                                                                                                                                                                                                                                                                                                                                                                                                                                                                                                                                                                                                                                                                                                                                                                                                                                                                                                                                                                                                                                                                                                                                                                                                                                                                                                                                                                                                                                                                                                                                                                   |           |        |         |         |         |         |         |         |         |         |         |          |          |          |          |          |          |          |          |          |          |          |          |          |          |          |          |          |          |          |          |          |          |          |          |          |          |          |          |          |          |          |          |          |          |          |          |          |          |          |          |          |          |          |          |          |          |          |          |          |          |          |          |          |          |          |          |          |          |          |          |          |          |          |          |          |          |          |          |          |          |          |          |          |          |          |          |          |          |          |          |          |          |          |          |          |          |          |          |          |          |          |          |           |           |           |           |           |           |           |           |           |           |           |
| H                                                                                                                                                                                                                                                                                                                                                                                                                                                                                                                                                                                                                                                                                                                                                                                                                                                                                                                                                                                                                                                                                                                                                                                                                                                                                                                                                                                                                                                                                                                                                                                                                                                                                                                                                                                                                                                                                                                                                                                                                                                                                                                                                                                                                                                                                                                                                                                                                                                                                                                                                                                                                                                                                               | 3.86928                                                                           | 2.27642                                                                            | -1.69672 |   |   |   |          |         |          |   |          |         |         |   |          |         |         |   |          |         |          |   |          |          |         |   |          |         |          |   |          |         |          |   |          |          |         |   |          |          |         |   |          |         |          |   |          |         |          |   |          |          |         |   |          |         |          |   |         |         |         |   |         |         |         |   |         |         |          |   |         |         |         |   |         |         |         |   |         |         |          |   |         |         |          |   |         |         |         |   |         |         |         |   |         |         |          |   |         |         |         |    |         |          |          |   |          |         |          |   |          |          |          |   |          |         |          |   |          |         |          |   |          |         |          |   |          |          |          |   |          |          |          |   |          |          |         |   |          |         |          |                                                                                                                                                                                                                                                                                                                                                                                                                                                                                                                                                                                                                                                                                                                                                                                                                                                                                                                                                                                                                                                                                                                                                                                                                                                                                                                                                                                                                                                                                                                                                                                                                                                                                                                                                                                                                                                                                                                                                                                                                                                                                                                                                                                                                                                                                                                                                                                                                                                                                                                   |           |        |         |         |         |         |         |         |         |         |         |          |          |          |          |          |          |          |          |          |          |          |          |          |          |          |          |          |          |          |          |          |          |          |          |          |          |          |          |          |          |          |          |          |          |          |          |          |          |          |          |          |          |          |          |          |          |          |          |          |          |          |          |          |          |          |          |          |          |          |          |          |          |          |          |          |          |          |          |          |          |          |          |          |          |          |          |          |          |          |          |          |          |          |          |          |          |          |          |          |          |          |          |           |           |           |           |           |           |           |           |           |           |           |
| H                                                                                                                                                                                                                                                                                                                                                                                                                                                                                                                                                                                                                                                                                                                                                                                                                                                                                                                                                                                                                                                                                                                                                                                                                                                                                                                                                                                                                                                                                                                                                                                                                                                                                                                                                                                                                                                                                                                                                                                                                                                                                                                                                                                                                                                                                                                                                                                                                                                                                                                                                                                                                                                                                               | 4.86928                                                                           | 1.72260                                                                            | 0.50506  |   |   |   |          |         |          |   |          |         |         |   |          |         |         |   |          |         |          |   |          |          |         |   |          |         |          |   |          |         |          |   |          |          |         |   |          |          |         |   |          |         |          |   |          |         |          |   |          |          |         |   |          |         |          |   |         |         |         |   |         |         |         |   |         |         |          |   |         |         |         |   |         |         |         |   |         |         |          |   |         |         |          |   |         |         |         |   |         |         |         |   |         |         |          |   |         |         |         |    |         |          |          |   |          |         |          |   |          |          |          |   |          |         |          |   |          |         |          |   |          |         |          |   |          |          |          |   |          |          |          |   |          |          |         |   |          |         |          |                                                                                                                                                                                                                                                                                                                                                                                                                                                                                                                                                                                                                                                                                                                                                                                                                                                                                                                                                                                                                                                                                                                                                                                                                                                                                                                                                                                                                                                                                                                                                                                                                                                                                                                                                                                                                                                                                                                                                                                                                                                                                                                                                                                                                                                                                                                                                                                                                                                                                                                   |           |        |         |         |         |         |         |         |         |         |         |          |          |          |          |          |          |          |          |          |          |          |          |          |          |          |          |          |          |          |          |          |          |          |          |          |          |          |          |          |          |          |          |          |          |          |          |          |          |          |          |          |          |          |          |          |          |          |          |          |          |          |          |          |          |          |          |          |          |          |          |          |          |          |          |          |          |          |          |          |          |          |          |          |          |          |          |          |          |          |          |          |          |          |          |          |          |          |          |          |          |          |          |           |           |           |           |           |           |           |           |           |           |           |
| Cs                                                                                                                                                                                                                                                                                                                                                                                                                                                                                                                                                                                                                                                                                                                                                                                                                                                                                                                                                                                                                                                                                                                                                                                                                                                                                                                                                                                                                                                                                                                                                                                                                                                                                                                                                                                                                                                                                                                                                                                                                                                                                                                                                                                                                                                                                                                                                                                                                                                                                                                                                                                                                                                                                              | 1.13863                                                                           | -1.78685                                                                           | -0.24190 |   |   |   |          |         |          |   |          |         |         |   |          |         |         |   |          |         |          |   |          |          |         |   |          |         |          |   |          |         |          |   |          |          |         |   |          |          |         |   |          |         |          |   |          |         |          |   |          |          |         |   |          |         |          |   |         |         |         |   |         |         |         |   |         |         |          |   |         |         |         |   |         |         |         |   |         |         |          |   |         |         |          |   |         |         |         |   |         |         |         |   |         |         |          |   |         |         |         |    |         |          |          |   |          |         |          |   |          |          |          |   |          |         |          |   |          |         |          |   |          |         |          |   |          |          |          |   |          |          |          |   |          |          |         |   |          |         |          |                                                                                                                                                                                                                                                                                                                                                                                                                                                                                                                                                                                                                                                                                                                                                                                                                                                                                                                                                                                                                                                                                                                                                                                                                                                                                                                                                                                                                                                                                                                                                                                                                                                                                                                                                                                                                                                                                                                                                                                                                                                                                                                                                                                                                                                                                                                                                                                                                                                                                                                   |           |        |         |         |         |         |         |         |         |         |         |          |          |          |          |          |          |          |          |          |          |          |          |          |          |          |          |          |          |          |          |          |          |          |          |          |          |          |          |          |          |          |          |          |          |          |          |          |          |          |          |          |          |          |          |          |          |          |          |          |          |          |          |          |          |          |          |          |          |          |          |          |          |          |          |          |          |          |          |          |          |          |          |          |          |          |          |          |          |          |          |          |          |          |          |          |          |          |          |          |          |          |          |           |           |           |           |           |           |           |           |           |           |           |
| C                                                                                                                                                                                                                                                                                                                                                                                                                                                                                                                                                                                                                                                                                                                                                                                                                                                                                                                                                                                                                                                                                                                                                                                                                                                                                                                                                                                                                                                                                                                                                                                                                                                                                                                                                                                                                                                                                                                                                                                                                                                                                                                                                                                                                                                                                                                                                                                                                                                                                                                                                                                                                                                                                               | -2.47342                                                                          | 3.43093                                                                            | -0.00949 |   |   |   |          |         |          |   |          |         |         |   |          |         |         |   |          |         |          |   |          |          |         |   |          |         |          |   |          |         |          |   |          |          |         |   |          |          |         |   |          |         |          |   |          |         |          |   |          |          |         |   |          |         |          |   |         |         |         |   |         |         |         |   |         |         |          |   |         |         |         |   |         |         |         |   |         |         |          |   |         |         |          |   |         |         |         |   |         |         |         |   |         |         |          |   |         |         |         |    |         |          |          |   |          |         |          |   |          |          |          |   |          |         |          |   |          |         |          |   |          |         |          |   |          |          |          |   |          |          |          |   |          |          |         |   |          |         |          |                                                                                                                                                                                                                                                                                                                                                                                                                                                                                                                                                                                                                                                                                                                                                                                                                                                                                                                                                                                                                                                                                                                                                                                                                                                                                                                                                                                                                                                                                                                                                                                                                                                                                                                                                                                                                                                                                                                                                                                                                                                                                                                                                                                                                                                                                                                                                                                                                                                                                                                   |           |        |         |         |         |         |         |         |         |         |         |          |          |          |          |          |          |          |          |          |          |          |          |          |          |          |          |          |          |          |          |          |          |          |          |          |          |          |          |          |          |          |          |          |          |          |          |          |          |          |          |          |          |          |          |          |          |          |          |          |          |          |          |          |          |          |          |          |          |          |          |          |          |          |          |          |          |          |          |          |          |          |          |          |          |          |          |          |          |          |          |          |          |          |          |          |          |          |          |          |          |          |          |           |           |           |           |           |           |           |           |           |           |           |
| C                                                                                                                                                                                                                                                                                                                                                                                                                                                                                                                                                                                                                                                                                                                                                                                                                                                                                                                                                                                                                                                                                                                                                                                                                                                                                                                                                                                                                                                                                                                                                                                                                                                                                                                                                                                                                                                                                                                                                                                                                                                                                                                                                                                                                                                                                                                                                                                                                                                                                                                                                                                                                                                                                               | -3.82339                                                                          | -1.41770                                                                           | -0.02924 |   |   |   |          |         |          |   |          |         |         |   |          |         |         |   |          |         |          |   |          |          |         |   |          |         |          |   |          |         |          |   |          |          |         |   |          |          |         |   |          |         |          |   |          |         |          |   |          |          |         |   |          |         |          |   |         |         |         |   |         |         |         |   |         |         |          |   |         |         |         |   |         |         |         |   |         |         |          |   |         |         |          |   |         |         |         |   |         |         |         |   |         |         |          |   |         |         |         |    |         |          |          |   |          |         |          |   |          |          |          |   |          |         |          |   |          |         |          |   |          |         |          |   |          |          |          |   |          |          |          |   |          |          |         |   |          |         |          |                                                                                                                                                                                                                                                                                                                                                                                                                                                                                                                                                                                                                                                                                                                                                                                                                                                                                                                                                                                                                                                                                                                                                                                                                                                                                                                                                                                                                                                                                                                                                                                                                                                                                                                                                                                                                                                                                                                                                                                                                                                                                                                                                                                                                                                                                                                                                                                                                                                                                                                   |           |        |         |         |         |         |         |         |         |         |         |          |          |          |          |          |          |          |          |          |          |          |          |          |          |          |          |          |          |          |          |          |          |          |          |          |          |          |          |          |          |          |          |          |          |          |          |          |          |          |          |          |          |          |          |          |          |          |          |          |          |          |          |          |          |          |          |          |          |          |          |          |          |          |          |          |          |          |          |          |          |          |          |          |          |          |          |          |          |          |          |          |          |          |          |          |          |          |          |          |          |          |          |           |           |           |           |           |           |           |           |           |           |           |
| C                                                                                                                                                                                                                                                                                                                                                                                                                                                                                                                                                                                                                                                                                                                                                                                                                                                                                                                                                                                                                                                                                                                                                                                                                                                                                                                                                                                                                                                                                                                                                                                                                                                                                                                                                                                                                                                                                                                                                                                                                                                                                                                                                                                                                                                                                                                                                                                                                                                                                                                                                                                                                                                                                               | -5.04390                                                                          | 0.68674                                                                            | -0.04268 |   |   |   |          |         |          |   |          |         |         |   |          |         |         |   |          |         |          |   |          |          |         |   |          |         |          |   |          |         |          |   |          |          |         |   |          |          |         |   |          |         |          |   |          |         |          |   |          |          |         |   |          |         |          |   |         |         |         |   |         |         |         |   |         |         |          |   |         |         |         |   |         |         |         |   |         |         |          |   |         |         |          |   |         |         |         |   |         |         |         |   |         |         |          |   |         |         |         |    |         |          |          |   |          |         |          |   |          |          |          |   |          |         |          |   |          |         |          |   |          |         |          |   |          |          |          |   |          |          |          |   |          |          |         |   |          |         |          |                                                                                                                                                                                                                                                                                                                                                                                                                                                                                                                                                                                                                                                                                                                                                                                                                                                                                                                                                                                                                                                                                                                                                                                                                                                                                                                                                                                                                                                                                                                                                                                                                                                                                                                                                                                                                                                                                                                                                                                                                                                                                                                                                                                                                                                                                                                                                                                                                                                                                                                   |           |        |         |         |         |         |         |         |         |         |         |          |          |          |          |          |          |          |          |          |          |          |          |          |          |          |          |          |          |          |          |          |          |          |          |          |          |          |          |          |          |          |          |          |          |          |          |          |          |          |          |          |          |          |          |          |          |          |          |          |          |          |          |          |          |          |          |          |          |          |          |          |          |          |          |          |          |          |          |          |          |          |          |          |          |          |          |          |          |          |          |          |          |          |          |          |          |          |          |          |          |          |          |           |           |           |           |           |           |           |           |           |           |           |
| C                                                                                                                                                                                                                                                                                                                                                                                                                                                                                                                                                                                                                                                                                                                                                                                                                                                                                                                                                                                                                                                                                                                                                                                                                                                                                                                                                                                                                                                                                                                                                                                                                                                                                                                                                                                                                                                                                                                                                                                                                                                                                                                                                                                                                                                                                                                                                                                                                                                                                                                                                                                                                                                                                               | -3.70087                                                                          | 2.84513                                                                            | -0.02388 |   |   |   |          |         |          |   |          |         |         |   |          |         |         |   |          |         |          |   |          |          |         |   |          |         |          |   |          |         |          |   |          |          |         |   |          |          |         |   |          |         |          |   |          |         |          |   |          |          |         |   |          |         |          |   |         |         |         |   |         |         |         |   |         |         |          |   |         |         |         |   |         |         |         |   |         |         |          |   |         |         |          |   |         |         |         |   |         |         |         |   |         |         |          |   |         |         |         |    |         |          |          |   |          |         |          |   |          |          |          |   |          |         |          |   |          |         |          |   |          |         |          |   |          |          |          |   |          |          |          |   |          |          |         |   |          |         |          |                                                                                                                                                                                                                                                                                                                                                                                                                                                                                                                                                                                                                                                                                                                                                                                                                                                                                                                                                                                                                                                                                                                                                                                                                                                                                                                                                                                                                                                                                                                                                                                                                                                                                                                                                                                                                                                                                                                                                                                                                                                                                                                                                                                                                                                                                                                                                                                                                                                                                                                   |           |        |         |         |         |         |         |         |         |         |         |          |          |          |          |          |          |          |          |          |          |          |          |          |          |          |          |          |          |          |          |          |          |          |          |          |          |          |          |          |          |          |          |          |          |          |          |          |          |          |          |          |          |          |          |          |          |          |          |          |          |          |          |          |          |          |          |          |          |          |          |          |          |          |          |          |          |          |          |          |          |          |          |          |          |          |          |          |          |          |          |          |          |          |          |          |          |          |          |          |          |          |          |           |           |           |           |           |           |           |           |           |           |           |
| H                                                                                                                                                                                                                                                                                                                                                                                                                                                                                                                                                                                                                                                                                                                                                                                                                                                                                                                                                                                                                                                                                                                                                                                                                                                                                                                                                                                                                                                                                                                                                                                                                                                                                                                                                                                                                                                                                                                                                                                                                                                                                                                                                                                                                                                                                                                                                                                                                                                                                                                                                                                                                                                                                               | -2.37687                                                                          | 4.51148                                                                            | -0.00260 |   |   |   |          |         |          |   |          |         |         |   |          |         |         |   |          |         |          |   |          |          |         |   |          |         |          |   |          |         |          |   |          |          |         |   |          |          |         |   |          |         |          |   |          |         |          |   |          |          |         |   |          |         |          |   |         |         |         |   |         |         |         |   |         |         |          |   |         |         |         |   |         |         |         |   |         |         |          |   |         |         |          |   |         |         |         |   |         |         |         |   |         |         |          |   |         |         |         |    |         |          |          |   |          |         |          |   |          |          |          |   |          |         |          |   |          |         |          |   |          |         |          |   |          |          |          |   |          |          |          |   |          |          |         |   |          |         |          |                                                                                                                                                                                                                                                                                                                                                                                                                                                                                                                                                                                                                                                                                                                                                                                                                                                                                                                                                                                                                                                                                                                                                                                                                                                                                                                                                                                                                                                                                                                                                                                                                                                                                                                                                                                                                                                                                                                                                                                                                                                                                                                                                                                                                                                                                                                                                                                                                                                                                                                   |           |        |         |         |         |         |         |         |         |         |         |          |          |          |          |          |          |          |          |          |          |          |          |          |          |          |          |          |          |          |          |          |          |          |          |          |          |          |          |          |          |          |          |          |          |          |          |          |          |          |          |          |          |          |          |          |          |          |          |          |          |          |          |          |          |          |          |          |          |          |          |          |          |          |          |          |          |          |          |          |          |          |          |          |          |          |          |          |          |          |          |          |          |          |          |          |          |          |          |          |          |          |          |           |           |           |           |           |           |           |           |           |           |           |
| C                                                                                                                                                                                                                                                                                                                                                                                                                                                                                                                                                                                                                                                                                                                                                                                                                                                                                                                                                                                                                                                                                                                                                                                                                                                                                                                                                                                                                                                                                                                                                                                                                                                                                                                                                                                                                                                                                                                                                                                                                                                                                                                                                                                                                                                                                                                                                                                                                                                                                                                                                                                                                                                                                               | -3.70086                                                                          | -2.84511                                                                           | -0.02396 |   |   |   |          |         |          |   |          |         |         |   |          |         |         |   |          |         |          |   |          |          |         |   |          |         |          |   |          |         |          |   |          |          |         |   |          |          |         |   |          |         |          |   |          |         |          |   |          |          |         |   |          |         |          |   |         |         |         |   |         |         |         |   |         |         |          |   |         |         |         |   |         |         |         |   |         |         |          |   |         |         |          |   |         |         |         |   |         |         |         |   |         |         |          |   |         |         |         |    |         |          |          |   |          |         |          |   |          |          |          |   |          |         |          |   |          |         |          |   |          |         |          |   |          |          |          |   |          |          |          |   |          |          |         |   |          |         |          |                                                                                                                                                                                                                                                                                                                                                                                                                                                                                                                                                                                                                                                                                                                                                                                                                                                                                                                                                                                                                                                                                                                                                                                                                                                                                                                                                                                                                                                                                                                                                                                                                                                                                                                                                                                                                                                                                                                                                                                                                                                                                                                                                                                                                                                                                                                                                                                                                                                                                                                   |           |        |         |         |         |         |         |         |         |         |         |          |          |          |          |          |          |          |          |          |          |          |          |          |          |          |          |          |          |          |          |          |          |          |          |          |          |          |          |          |          |          |          |          |          |          |          |          |          |          |          |          |          |          |          |          |          |          |          |          |          |          |          |          |          |          |          |          |          |          |          |          |          |          |          |          |          |          |          |          |          |          |          |          |          |          |          |          |          |          |          |          |          |          |          |          |          |          |          |          |          |          |          |           |           |           |           |           |           |           |           |           |           |           |
| C                                                                                                                                                                                                                                                                                                                                                                                                                                                                                                                                                                                                                                                                                                                                                                                                                                                                                                                                                                                                                                                                                                                                                                                                                                                                                                                                                                                                                                                                                                                                                                                                                                                                                                                                                                                                                                                                                                                                                                                                                                                                                                                                                                                                                                                                                                                                                                                                                                                                                                                                                                                                                                                                                               | -5.04390                                                                          | -0.68672                                                                           | -0.04268 |   |   |   |          |         |          |   |          |         |         |   |          |         |         |   |          |         |          |   |          |          |         |   |          |         |          |   |          |         |          |   |          |          |         |   |          |          |         |   |          |         |          |   |          |         |          |   |          |          |         |   |          |         |          |   |         |         |         |   |         |         |         |   |         |         |          |   |         |         |         |   |         |         |         |   |         |         |          |   |         |         |          |   |         |         |         |   |         |         |         |   |         |         |          |   |         |         |         |    |         |          |          |   |          |         |          |   |          |          |          |   |          |         |          |   |          |         |          |   |          |         |          |   |          |          |          |   |          |          |          |   |          |          |         |   |          |         |          |                                                                                                                                                                                                                                                                                                                                                                                                                                                                                                                                                                                                                                                                                                                                                                                                                                                                                                                                                                                                                                                                                                                                                                                                                                                                                                                                                                                                                                                                                                                                                                                                                                                                                                                                                                                                                                                                                                                                                                                                                                                                                                                                                                                                                                                                                                                                                                                                                                                                                                                   |           |        |         |         |         |         |         |         |         |         |         |          |          |          |          |          |          |          |          |          |          |          |          |          |          |          |          |          |          |          |          |          |          |          |          |          |          |          |          |          |          |          |          |          |          |          |          |          |          |          |          |          |          |          |          |          |          |          |          |          |          |          |          |          |          |          |          |          |          |          |          |          |          |          |          |          |          |          |          |          |          |          |          |          |          |          |          |          |          |          |          |          |          |          |          |          |          |          |          |          |          |          |          |           |           |           |           |           |           |           |           |           |           |           |
| C                                                                                                                                                                                                                                                                                                                                                                                                                                                                                                                                                                                                                                                                                                                                                                                                                                                                                                                                                                                                                                                                                                                                                                                                                                                                                                                                                                                                                                                                                                                                                                                                                                                                                                                                                                                                                                                                                                                                                                                                                                                                                                                                                                                                                                                                                                                                                                                                                                                                                                                                                                                                                                                                                               | -1.25756                                                                          | -2.64674                                                                           | 0.00047  |   |   |   |          |         |          |   |          |         |         |   |          |         |         |   |          |         |          |   |          |          |         |   |          |         |          |   |          |         |          |   |          |          |         |   |          |          |         |   |          |         |          |   |          |         |          |   |          |          |         |   |          |         |          |   |         |         |         |   |         |         |         |   |         |         |          |   |         |         |         |   |         |         |         |   |         |         |          |   |         |         |          |   |         |         |         |   |         |         |         |   |         |         |          |   |         |         |         |    |         |          |          |   |          |         |          |   |          |          |          |   |          |         |          |   |          |         |          |   |          |         |          |   |          |          |          |   |          |          |          |   |          |          |         |   |          |         |          |                                                                                                                                                                                                                                                                                                                                                                                                                                                                                                                                                                                                                                                                                                                                                                                                                                                                                                                                                                                                                                                                                                                                                                                                                                                                                                                                                                                                                                                                                                                                                                                                                                                                                                                                                                                                                                                                                                                                                                                                                                                                                                                                                                                                                                                                                                                                                                                                                                                                                                                   |           |        |         |         |         |         |         |         |         |         |         |          |          |          |          |          |          |          |          |          |          |          |          |          |          |          |          |          |          |          |          |          |          |          |          |          |          |          |          |          |          |          |          |          |          |          |          |          |          |          |          |          |          |          |          |          |          |          |          |          |          |          |          |          |          |          |          |          |          |          |          |          |          |          |          |          |          |          |          |          |          |          |          |          |          |          |          |          |          |          |          |          |          |          |          |          |          |          |          |          |          |          |          |           |           |           |           |           |           |           |           |           |           |           |
| H                                                                                                                                                                                                                                                                                                                                                                                                                                                                                                                                                                                                                                                                                                                                                                                                                                                                                                                                                                                                                                                                                                                                                                                                                                                                                                                                                                                                                                                                                                                                                                                                                                                                                                                                                                                                                                                                                                                                                                                                                                                                                                                                                                                                                                                                                                                                                                                                                                                                                                                                                                                                                                                                                               | -5.98116                                                                          | 1.23509                                                                            | -0.05313 |   |   |   |          |         |          |   |          |         |         |   |          |         |         |   |          |         |          |   |          |          |         |   |          |         |          |   |          |         |          |   |          |          |         |   |          |          |         |   |          |         |          |   |          |         |          |   |          |          |         |   |          |         |          |   |         |         |         |   |         |         |         |   |         |         |          |   |         |         |         |   |         |         |         |   |         |         |          |   |         |         |          |   |         |         |         |   |         |         |         |   |         |         |          |   |         |         |         |    |         |          |          |   |          |         |          |   |          |          |          |   |          |         |          |   |          |         |          |   |          |         |          |   |          |          |          |   |          |          |          |   |          |          |         |   |          |         |          |                                                                                                                                                                                                                                                                                                                                                                                                                                                                                                                                                                                                                                                                                                                                                                                                                                                                                                                                                                                                                                                                                                                                                                                                                                                                                                                                                                                                                                                                                                                                                                                                                                                                                                                                                                                                                                                                                                                                                                                                                                                                                                                                                                                                                                                                                                                                                                                                                                                                                                                   |           |        |         |         |         |         |         |         |         |         |         |          |          |          |          |          |          |          |          |          |          |          |          |          |          |          |          |          |          |          |          |          |          |          |          |          |          |          |          |          |          |          |          |          |          |          |          |          |          |          |          |          |          |          |          |          |          |          |          |          |          |          |          |          |          |          |          |          |          |          |          |          |          |          |          |          |          |          |          |          |          |          |          |          |          |          |          |          |          |          |          |          |          |          |          |          |          |          |          |          |          |          |          |           |           |           |           |           |           |           |           |           |           |           |
| -713.6423                                                                                                                                                                                                                                                                                                                                                                                                                                                                                                                                                                                                                                                                                                                                                                                                                                                                                                                                                                                                                                                                                                                                                                                                                                                                                                                                                                                                                                                                                                                                                                                                                                                                                                                                                                                                                                                                                                                                                                                                                                                                                                                                                                                                                                                                                                                                                                                                                                                                                                                                                                                                                                                                                       | 9.8729                                                                            | 25.8497                                                                            |          |   |   |   |          |         |          |   |          |         |         |   |          |         |         |   |          |         |          |   |          |          |         |   |          |         |          |   |          |         |          |   |          |          |         |   |          |          |         |   |          |         |          |   |          |         |          |   |          |          |         |   |          |         |          |   |         |         |         |   |         |         |         |   |         |         |          |   |         |         |         |   |         |         |         |   |         |         |          |   |         |         |          |   |         |         |         |   |         |         |         |   |         |         |          |   |         |         |         |    |         |          |          |   |          |         |          |   |          |          |          |   |          |         |          |   |          |         |          |   |          |         |          |   |          |          |          |   |          |          |          |   |          |          |         |   |          |         |          |                                                                                                                                                                                                                                                                                                                                                                                                                                                                                                                                                                                                                                                                                                                                                                                                                                                                                                                                                                                                                                                                                                                                                                                                                                                                                                                                                                                                                                                                                                                                                                                                                                                                                                                                                                                                                                                                                                                                                                                                                                                                                                                                                                                                                                                                                                                                                                                                                                                                                                                   |           |        |         |         |         |         |         |         |         |         |         |          |          |          |          |          |          |          |          |          |          |          |          |          |          |          |          |          |          |          |          |          |          |          |          |          |          |          |          |          |          |          |          |          |          |          |          |          |          |          |          |          |          |          |          |          |          |          |          |          |          |          |          |          |          |          |          |          |          |          |          |          |          |          |          |          |          |          |          |          |          |          |          |          |          |          |          |          |          |          |          |          |          |          |          |          |          |          |          |          |          |          |          |           |           |           |           |           |           |           |           |           |           |           |
| 28.5252                                                                                                                                                                                                                                                                                                                                                                                                                                                                                                                                                                                                                                                                                                                                                                                                                                                                                                                                                                                                                                                                                                                                                                                                                                                                                                                                                                                                                                                                                                                                                                                                                                                                                                                                                                                                                                                                                                                                                                                                                                                                                                                                                                                                                                                                                                                                                                                                                                                                                                                                                                                                                                                                                         | 39.7924                                                                           | 50.5448                                                                            |          |   |   |   |          |         |          |   |          |         |         |   |          |         |         |   |          |         |          |   |          |          |         |   |          |         |          |   |          |         |          |   |          |          |         |   |          |          |         |   |          |         |          |   |          |         |          |   |          |          |         |   |          |         |          |   |         |         |         |   |         |         |         |   |         |         |          |   |         |         |         |   |         |         |         |   |         |         |          |   |         |         |          |   |         |         |         |   |         |         |         |   |         |         |          |   |         |         |         |    |         |          |          |   |          |         |          |   |          |          |          |   |          |         |          |   |          |         |          |   |          |         |          |   |          |          |          |   |          |          |          |   |          |          |         |   |          |         |          |                                                                                                                                                                                                                                                                                                                                                                                                                                                                                                                                                                                                                                                                                                                                                                                                                                                                                                                                                                                                                                                                                                                                                                                                                                                                                                                                                                                                                                                                                                                                                                                                                                                                                                                                                                                                                                                                                                                                                                                                                                                                                                                                                                                                                                                                                                                                                                                                                                                                                                                   |           |        |         |         |         |         |         |         |         |         |         |          |          |          |          |          |          |          |          |          |          |          |          |          |          |          |          |          |          |          |          |          |          |          |          |          |          |          |          |          |          |          |          |          |          |          |          |          |          |          |          |          |          |          |          |          |          |          |          |          |          |          |          |          |          |          |          |          |          |          |          |          |          |          |          |          |          |          |          |          |          |          |          |          |          |          |          |          |          |          |          |          |          |          |          |          |          |          |          |          |          |          |          |           |           |           |           |           |           |           |           |           |           |           |
| 54.1918                                                                                                                                                                                                                                                                                                                                                                                                                                                                                                                                                                                                                                                                                                                                                                                                                                                                                                                                                                                                                                                                                                                                                                                                                                                                                                                                                                                                                                                                                                                                                                                                                                                                                                                                                                                                                                                                                                                                                                                                                                                                                                                                                                                                                                                                                                                                                                                                                                                                                                                                                                                                                                                                                         | 62.4594                                                                           | 69.8988                                                                            |          |   |   |   |          |         |          |   |          |         |         |   |          |         |         |   |          |         |          |   |          |          |         |   |          |         |          |   |          |         |          |   |          |          |         |   |          |          |         |   |          |         |          |   |          |         |          |   |          |          |         |   |          |         |          |   |         |         |         |   |         |         |         |   |         |         |          |   |         |         |         |   |         |         |         |   |         |         |          |   |         |         |          |   |         |         |         |   |         |         |         |   |         |         |          |   |         |         |         |    |         |          |          |   |          |         |          |   |          |          |          |   |          |         |          |   |          |         |          |   |          |         |          |   |          |          |          |   |          |          |          |   |          |          |         |   |          |         |          |                                                                                                                                                                                                                                                                                                                                                                                                                                                                                                                                                                                                                                                                                                                                                                                                                                                                                                                                                                                                                                                                                                                                                                                                                                                                                                                                                                                                                                                                                                                                                                                                                                                                                                                                                                                                                                                                                                                                                                                                                                                                                                                                                                                                                                                                                                                                                                                                                                                                                                                   |           |        |         |         |         |         |         |         |         |         |         |          |          |          |          |          |          |          |          |          |          |          |          |          |          |          |          |          |          |          |          |          |          |          |          |          |          |          |          |          |          |          |          |          |          |          |          |          |          |          |          |          |          |          |          |          |          |          |          |          |          |          |          |          |          |          |          |          |          |          |          |          |          |          |          |          |          |          |          |          |          |          |          |          |          |          |          |          |          |          |          |          |          |          |          |          |          |          |          |          |          |          |          |           |           |           |           |           |           |           |           |           |           |           |
| 77.0474                                                                                                                                                                                                                                                                                                                                                                                                                                                                                                                                                                                                                                                                                                                                                                                                                                                                                                                                                                                                                                                                                                                                                                                                                                                                                                                                                                                                                                                                                                                                                                                                                                                                                                                                                                                                                                                                                                                                                                                                                                                                                                                                                                                                                                                                                                                                                                                                                                                                                                                                                                                                                                                                                         | 97.4742                                                                           | 104.3999                                                                           |          |   |   |   |          |         |          |   |          |         |         |   |          |         |         |   |          |         |          |   |          |          |         |   |          |         |          |   |          |         |          |   |          |          |         |   |          |          |         |   |          |         |          |   |          |         |          |   |          |          |         |   |          |         |          |   |         |         |         |   |         |         |         |   |         |         |          |   |         |         |         |   |         |         |         |   |         |         |          |   |         |         |          |   |         |         |         |   |         |         |         |   |         |         |          |   |         |         |         |    |         |          |          |   |          |         |          |   |          |          |          |   |          |         |          |   |          |         |          |   |          |         |          |   |          |          |          |   |          |          |          |   |          |          |         |   |          |         |          |                                                                                                                                                                                                                                                                                                                                                                                                                                                                                                                                                                                                                                                                                                                                                                                                                                                                                                                                                                                                                                                                                                                                                                                                                                                                                                                                                                                                                                                                                                                                                                                                                                                                                                                                                                                                                                                                                                                                                                                                                                                                                                                                                                                                                                                                                                                                                                                                                                                                                                                   |           |        |         |         |         |         |         |         |         |         |         |          |          |          |          |          |          |          |          |          |          |          |          |          |          |          |          |          |          |          |          |          |          |          |          |          |          |          |          |          |          |          |          |          |          |          |          |          |          |          |          |          |          |          |          |          |          |          |          |          |          |          |          |          |          |          |          |          |          |          |          |          |          |          |          |          |          |          |          |          |          |          |          |          |          |          |          |          |          |          |          |          |          |          |          |          |          |          |          |          |          |          |          |           |           |           |           |           |           |           |           |           |           |           |
| 108.8623                                                                                                                                                                                                                                                                                                                                                                                                                                                                                                                                                                                                                                                                                                                                                                                                                                                                                                                                                                                                                                                                                                                                                                                                                                                                                                                                                                                                                                                                                                                                                                                                                                                                                                                                                                                                                                                                                                                                                                                                                                                                                                                                                                                                                                                                                                                                                                                                                                                                                                                                                                                                                                                                                        | 114.9102                                                                          | 128.5425                                                                           |          |   |   |   |          |         |          |   |          |         |         |   |          |         |         |   |          |         |          |   |          |          |         |   |          |         |          |   |          |         |          |   |          |          |         |   |          |          |         |   |          |         |          |   |          |         |          |   |          |          |         |   |          |         |          |   |         |         |         |   |         |         |         |   |         |         |          |   |         |         |         |   |         |         |         |   |         |         |          |   |         |         |          |   |         |         |         |   |         |         |         |   |         |         |          |   |         |         |         |    |         |          |          |   |          |         |          |   |          |          |          |   |          |         |          |   |          |         |          |   |          |         |          |   |          |          |          |   |          |          |          |   |          |          |         |   |          |         |          |                                                                                                                                                                                                                                                                                                                                                                                                                                                                                                                                                                                                                                                                                                                                                                                                                                                                                                                                                                                                                                                                                                                                                                                                                                                                                                                                                                                                                                                                                                                                                                                                                                                                                                                                                                                                                                                                                                                                                                                                                                                                                                                                                                                                                                                                                                                                                                                                                                                                                                                   |           |        |         |         |         |         |         |         |         |         |         |          |          |          |          |          |          |          |          |          |          |          |          |          |          |          |          |          |          |          |          |          |          |          |          |          |          |          |          |          |          |          |          |          |          |          |          |          |          |          |          |          |          |          |          |          |          |          |          |          |          |          |          |          |          |          |          |          |          |          |          |          |          |          |          |          |          |          |          |          |          |          |          |          |          |          |          |          |          |          |          |          |          |          |          |          |          |          |          |          |          |          |          |           |           |           |           |           |           |           |           |           |           |           |
| 139.7552                                                                                                                                                                                                                                                                                                                                                                                                                                                                                                                                                                                                                                                                                                                                                                                                                                                                                                                                                                                                                                                                                                                                                                                                                                                                                                                                                                                                                                                                                                                                                                                                                                                                                                                                                                                                                                                                                                                                                                                                                                                                                                                                                                                                                                                                                                                                                                                                                                                                                                                                                                                                                                                                                        | 161.9888                                                                          | 165.5346                                                                           |          |   |   |   |          |         |          |   |          |         |         |   |          |         |         |   |          |         |          |   |          |          |         |   |          |         |          |   |          |         |          |   |          |          |         |   |          |          |         |   |          |         |          |   |          |         |          |   |          |          |         |   |          |         |          |   |         |         |         |   |         |         |         |   |         |         |          |   |         |         |         |   |         |         |         |   |         |         |          |   |         |         |          |   |         |         |         |   |         |         |         |   |         |         |          |   |         |         |         |    |         |          |          |   |          |         |          |   |          |          |          |   |          |         |          |   |          |         |          |   |          |         |          |   |          |          |          |   |          |          |          |   |          |          |         |   |          |         |          |                                                                                                                                                                                                                                                                                                                                                                                                                                                                                                                                                                                                                                                                                                                                                                                                                                                                                                                                                                                                                                                                                                                                                                                                                                                                                                                                                                                                                                                                                                                                                                                                                                                                                                                                                                                                                                                                                                                                                                                                                                                                                                                                                                                                                                                                                                                                                                                                                                                                                                                   |           |        |         |         |         |         |         |         |         |         |         |          |          |          |          |          |          |          |          |          |          |          |          |          |          |          |          |          |          |          |          |          |          |          |          |          |          |          |          |          |          |          |          |          |          |          |          |          |          |          |          |          |          |          |          |          |          |          |          |          |          |          |          |          |          |          |          |          |          |          |          |          |          |          |          |          |          |          |          |          |          |          |          |          |          |          |          |          |          |          |          |          |          |          |          |          |          |          |          |          |          |          |          |           |           |           |           |           |           |           |           |           |           |           |
| 178.3697                                                                                                                                                                                                                                                                                                                                                                                                                                                                                                                                                                                                                                                                                                                                                                                                                                                                                                                                                                                                                                                                                                                                                                                                                                                                                                                                                                                                                                                                                                                                                                                                                                                                                                                                                                                                                                                                                                                                                                                                                                                                                                                                                                                                                                                                                                                                                                                                                                                                                                                                                                                                                                                                                        | 206.3680                                                                          | 213.3269                                                                           |          |   |   |   |          |         |          |   |          |         |         |   |          |         |         |   |          |         |          |   |          |          |         |   |          |         |          |   |          |         |          |   |          |          |         |   |          |          |         |   |          |         |          |   |          |         |          |   |          |          |         |   |          |         |          |   |         |         |         |   |         |         |         |   |         |         |          |   |         |         |         |   |         |         |         |   |         |         |          |   |         |         |          |   |         |         |         |   |         |         |         |   |         |         |          |   |         |         |         |    |         |          |          |   |          |         |          |   |          |          |          |   |          |         |          |   |          |         |          |   |          |         |          |   |          |          |          |   |          |          |          |   |          |          |         |   |          |         |          |                                                                                                                                                                                                                                                                                                                                                                                                                                                                                                                                                                                                                                                                                                                                                                                                                                                                                                                                                                                                                                                                                                                                                                                                                                                                                                                                                                                                                                                                                                                                                                                                                                                                                                                                                                                                                                                                                                                                                                                                                                                                                                                                                                                                                                                                                                                                                                                                                                                                                                                   |           |        |         |         |         |         |         |         |         |         |         |          |          |          |          |          |          |          |          |          |          |          |          |          |          |          |          |          |          |          |          |          |          |          |          |          |          |          |          |          |          |          |          |          |          |          |          |          |          |          |          |          |          |          |          |          |          |          |          |          |          |          |          |          |          |          |          |          |          |          |          |          |          |          |          |          |          |          |          |          |          |          |          |          |          |          |          |          |          |          |          |          |          |          |          |          |          |          |          |          |          |          |          |           |           |           |           |           |           |           |           |           |           |           |
| 221.3672                                                                                                                                                                                                                                                                                                                                                                                                                                                                                                                                                                                                                                                                                                                                                                                                                                                                                                                                                                                                                                                                                                                                                                                                                                                                                                                                                                                                                                                                                                                                                                                                                                                                                                                                                                                                                                                                                                                                                                                                                                                                                                                                                                                                                                                                                                                                                                                                                                                                                                                                                                                                                                                                                        | 245.6592                                                                          | 247.0890                                                                           |          |   |   |   |          |         |          |   |          |         |         |   |          |         |         |   |          |         |          |   |          |          |         |   |          |         |          |   |          |         |          |   |          |          |         |   |          |          |         |   |          |         |          |   |          |         |          |   |          |          |         |   |          |         |          |   |         |         |         |   |         |         |         |   |         |         |          |   |         |         |         |   |         |         |         |   |         |         |          |   |         |         |          |   |         |         |         |   |         |         |         |   |         |         |          |   |         |         |         |    |         |          |          |   |          |         |          |   |          |          |          |   |          |         |          |   |          |         |          |   |          |         |          |   |          |          |          |   |          |          |          |   |          |          |         |   |          |         |          |                                                                                                                                                                                                                                                                                                                                                                                                                                                                                                                                                                                                                                                                                                                                                                                                                                                                                                                                                                                                                                                                                                                                                                                                                                                                                                                                                                                                                                                                                                                                                                                                                                                                                                                                                                                                                                                                                                                                                                                                                                                                                                                                                                                                                                                                                                                                                                                                                                                                                                                   |           |        |         |         |         |         |         |         |         |         |         |          |          |          |          |          |          |          |          |          |          |          |          |          |          |          |          |          |          |          |          |          |          |          |          |          |          |          |          |          |          |          |          |          |          |          |          |          |          |          |          |          |          |          |          |          |          |          |          |          |          |          |          |          |          |          |          |          |          |          |          |          |          |          |          |          |          |          |          |          |          |          |          |          |          |          |          |          |          |          |          |          |          |          |          |          |          |          |          |          |          |          |          |           |           |           |           |           |           |           |           |           |           |           |
| 261.8036                                                                                                                                                                                                                                                                                                                                                                                                                                                                                                                                                                                                                                                                                                                                                                                                                                                                                                                                                                                                                                                                                                                                                                                                                                                                                                                                                                                                                                                                                                                                                                                                                                                                                                                                                                                                                                                                                                                                                                                                                                                                                                                                                                                                                                                                                                                                                                                                                                                                                                                                                                                                                                                                                        | 264.7102                                                                          | 270.4847                                                                           |          |   |   |   |          |         |          |   |          |         |         |   |          |         |         |   |          |         |          |   |          |          |         |   |          |         |          |   |          |         |          |   |          |          |         |   |          |          |         |   |          |         |          |   |          |         |          |   |          |          |         |   |          |         |          |   |         |         |         |   |         |         |         |   |         |         |          |   |         |         |         |   |         |         |         |   |         |         |          |   |         |         |          |   |         |         |         |   |         |         |         |   |         |         |          |   |         |         |         |    |         |          |          |   |          |         |          |   |          |          |          |   |          |         |          |   |          |         |          |   |          |         |          |   |          |          |          |   |          |          |          |   |          |          |         |   |          |         |          |                                                                                                                                                                                                                                                                                                                                                                                                                                                                                                                                                                                                                                                                                                                                                                                                                                                                                                                                                                                                                                                                                                                                                                                                                                                                                                                                                                                                                                                                                                                                                                                                                                                                                                                                                                                                                                                                                                                                                                                                                                                                                                                                                                                                                                                                                                                                                                                                                                                                                                                   |           |        |         |         |         |         |         |         |         |         |         |          |          |          |          |          |          |          |          |          |          |          |          |          |          |          |          |          |          |          |          |          |          |          |          |          |          |          |          |          |          |          |          |          |          |          |          |          |          |          |          |          |          |          |          |          |          |          |          |          |          |          |          |          |          |          |          |          |          |          |          |          |          |          |          |          |          |          |          |          |          |          |          |          |          |          |          |          |          |          |          |          |          |          |          |          |          |          |          |          |          |          |          |           |           |           |           |           |           |           |           |           |           |           |
| 277.5364                                                                                                                                                                                                                                                                                                                                                                                                                                                                                                                                                                                                                                                                                                                                                                                                                                                                                                                                                                                                                                                                                                                                                                                                                                                                                                                                                                                                                                                                                                                                                                                                                                                                                                                                                                                                                                                                                                                                                                                                                                                                                                                                                                                                                                                                                                                                                                                                                                                                                                                                                                                                                                                                                        | 301.3189                                                                          | 307.8430                                                                           |          |   |   |   |          |         |          |   |          |         |         |   |          |         |         |   |          |         |          |   |          |          |         |   |          |         |          |   |          |         |          |   |          |          |         |   |          |          |         |   |          |         |          |   |          |         |          |   |          |          |         |   |          |         |          |   |         |         |         |   |         |         |         |   |         |         |          |   |         |         |         |   |         |         |         |   |         |         |          |   |         |         |          |   |         |         |         |   |         |         |         |   |         |         |          |   |         |         |         |    |         |          |          |   |          |         |          |   |          |          |          |   |          |         |          |   |          |         |          |   |          |         |          |   |          |          |          |   |          |          |          |   |          |          |         |   |          |         |          |                                                                                                                                                                                                                                                                                                                                                                                                                                                                                                                                                                                                                                                                                                                                                                                                                                                                                                                                                                                                                                                                                                                                                                                                                                                                                                                                                                                                                                                                                                                                                                                                                                                                                                                                                                                                                                                                                                                                                                                                                                                                                                                                                                                                                                                                                                                                                                                                                                                                                                                   |           |        |         |         |         |         |         |         |         |         |         |          |          |          |          |          |          |          |          |          |          |          |          |          |          |          |          |          |          |          |          |          |          |          |          |          |          |          |          |          |          |          |          |          |          |          |          |          |          |          |          |          |          |          |          |          |          |          |          |          |          |          |          |          |          |          |          |          |          |          |          |          |          |          |          |          |          |          |          |          |          |          |          |          |          |          |          |          |          |          |          |          |          |          |          |          |          |          |          |          |          |          |          |           |           |           |           |           |           |           |           |           |           |           |
| 337.5945                                                                                                                                                                                                                                                                                                                                                                                                                                                                                                                                                                                                                                                                                                                                                                                                                                                                                                                                                                                                                                                                                                                                                                                                                                                                                                                                                                                                                                                                                                                                                                                                                                                                                                                                                                                                                                                                                                                                                                                                                                                                                                                                                                                                                                                                                                                                                                                                                                                                                                                                                                                                                                                                                        | 342.4677                                                                          | 351.4730                                                                           |          |   |   |   |          |         |          |   |          |         |         |   |          |         |         |   |          |         |          |   |          |          |         |   |          |         |          |   |          |         |          |   |          |          |         |   |          |          |         |   |          |         |          |   |          |         |          |   |          |          |         |   |          |         |          |   |         |         |         |   |         |         |         |   |         |         |          |   |         |         |         |   |         |         |         |   |         |         |          |   |         |         |          |   |         |         |         |   |         |         |         |   |         |         |          |   |         |         |         |    |         |          |          |   |          |         |          |   |          |          |          |   |          |         |          |   |          |         |          |   |          |         |          |   |          |          |          |   |          |          |          |   |          |          |         |   |          |         |          |                                                                                                                                                                                                                                                                                                                                                                                                                                                                                                                                                                                                                                                                                                                                                                                                                                                                                                                                                                                                                                                                                                                                                                                                                                                                                                                                                                                                                                                                                                                                                                                                                                                                                                                                                                                                                                                                                                                                                                                                                                                                                                                                                                                                                                                                                                                                                                                                                                                                                                                   |           |        |         |         |         |         |         |         |         |         |         |          |          |          |          |          |          |          |          |          |          |          |          |          |          |          |          |          |          |          |          |          |          |          |          |          |          |          |          |          |          |          |          |          |          |          |          |          |          |          |          |          |          |          |          |          |          |          |          |          |          |          |          |          |          |          |          |          |          |          |          |          |          |          |          |          |          |          |          |          |          |          |          |          |          |          |          |          |          |          |          |          |          |          |          |          |          |          |          |          |          |          |          |           |           |           |           |           |           |           |           |           |           |           |
| 364.2098                                                                                                                                                                                                                                                                                                                                                                                                                                                                                                                                                                                                                                                                                                                                                                                                                                                                                                                                                                                                                                                                                                                                                                                                                                                                                                                                                                                                                                                                                                                                                                                                                                                                                                                                                                                                                                                                                                                                                                                                                                                                                                                                                                                                                                                                                                                                                                                                                                                                                                                                                                                                                                                                                        | 378.2011                                                                          | 387.1523                                                                           |          |   |   |   |          |         |          |   |          |         |         |   |          |         |         |   |          |         |          |   |          |          |         |   |          |         |          |   |          |         |          |   |          |          |         |   |          |          |         |   |          |         |          |   |          |         |          |   |          |          |         |   |          |         |          |   |         |         |         |   |         |         |         |   |         |         |          |   |         |         |         |   |         |         |         |   |         |         |          |   |         |         |          |   |         |         |         |   |         |         |         |   |         |         |          |   |         |         |         |    |         |          |          |   |          |         |          |   |          |          |          |   |          |         |          |   |          |         |          |   |          |         |          |   |          |          |          |   |          |          |          |   |          |          |         |   |          |         |          |                                                                                                                                                                                                                                                                                                                                                                                                                                                                                                                                                                                                                                                                                                                                                                                                                                                                                                                                                                                                                                                                                                                                                                                                                                                                                                                                                                                                                                                                                                                                                                                                                                                                                                                                                                                                                                                                                                                                                                                                                                                                                                                                                                                                                                                                                                                                                                                                                                                                                                                   |           |        |         |         |         |         |         |         |         |         |         |          |          |          |          |          |          |          |          |          |          |          |          |          |          |          |          |          |          |          |          |          |          |          |          |          |          |          |          |          |          |          |          |          |          |          |          |          |          |          |          |          |          |          |          |          |          |          |          |          |          |          |          |          |          |          |          |          |          |          |          |          |          |          |          |          |          |          |          |          |          |          |          |          |          |          |          |          |          |          |          |          |          |          |          |          |          |          |          |          |          |          |          |           |           |           |           |           |           |           |           |           |           |           |
| 402.9772                                                                                                                                                                                                                                                                                                                                                                                                                                                                                                                                                                                                                                                                                                                                                                                                                                                                                                                                                                                                                                                                                                                                                                                                                                                                                                                                                                                                                                                                                                                                                                                                                                                                                                                                                                                                                                                                                                                                                                                                                                                                                                                                                                                                                                                                                                                                                                                                                                                                                                                                                                                                                                                                                        | 405.1126                                                                          | 406.6595                                                                           |          |   |   |   |          |         |          |   |          |         |         |   |          |         |         |   |          |         |          |   |          |          |         |   |          |         |          |   |          |         |          |   |          |          |         |   |          |          |         |   |          |         |          |   |          |         |          |   |          |          |         |   |          |         |          |   |         |         |         |   |         |         |         |   |         |         |          |   |         |         |         |   |         |         |         |   |         |         |          |   |         |         |          |   |         |         |         |   |         |         |         |   |         |         |          |   |         |         |         |    |         |          |          |   |          |         |          |   |          |          |          |   |          |         |          |   |          |         |          |   |          |         |          |   |          |          |          |   |          |          |          |   |          |          |         |   |          |         |          |                                                                                                                                                                                                                                                                                                                                                                                                                                                                                                                                                                                                                                                                                                                                                                                                                                                                                                                                                                                                                                                                                                                                                                                                                                                                                                                                                                                                                                                                                                                                                                                                                                                                                                                                                                                                                                                                                                                                                                                                                                                                                                                                                                                                                                                                                                                                                                                                                                                                                                                   |           |        |         |         |         |         |         |         |         |         |         |          |          |          |          |          |          |          |          |          |          |          |          |          |          |          |          |          |          |          |          |          |          |          |          |          |          |          |          |          |          |          |          |          |          |          |          |          |          |          |          |          |          |          |          |          |          |          |          |          |          |          |          |          |          |          |          |          |          |          |          |          |          |          |          |          |          |          |          |          |          |          |          |          |          |          |          |          |          |          |          |          |          |          |          |          |          |          |          |          |          |          |          |           |           |           |           |           |           |           |           |           |           |           |
| 426.2320                                                                                                                                                                                                                                                                                                                                                                                                                                                                                                                                                                                                                                                                                                                                                                                                                                                                                                                                                                                                                                                                                                                                                                                                                                                                                                                                                                                                                                                                                                                                                                                                                                                                                                                                                                                                                                                                                                                                                                                                                                                                                                                                                                                                                                                                                                                                                                                                                                                                                                                                                                                                                                                                                        | 432.7669                                                                          | 445.1495                                                                           |          |   |   |   |          |         |          |   |          |         |         |   |          |         |         |   |          |         |          |   |          |          |         |   |          |         |          |   |          |         |          |   |          |          |         |   |          |          |         |   |          |         |          |   |          |         |          |   |          |          |         |   |          |         |          |   |         |         |         |   |         |         |         |   |         |         |          |   |         |         |         |   |         |         |         |   |         |         |          |   |         |         |          |   |         |         |         |   |         |         |         |   |         |         |          |   |         |         |         |    |         |          |          |   |          |         |          |   |          |          |          |   |          |         |          |   |          |         |          |   |          |         |          |   |          |          |          |   |          |          |          |   |          |          |         |   |          |         |          |                                                                                                                                                                                                                                                                                                                                                                                                                                                                                                                                                                                                                                                                                                                                                                                                                                                                                                                                                                                                                                                                                                                                                                                                                                                                                                                                                                                                                                                                                                                                                                                                                                                                                                                                                                                                                                                                                                                                                                                                                                                                                                                                                                                                                                                                                                                                                                                                                                                                                                                   |           |        |         |         |         |         |         |         |         |         |         |          |          |          |          |          |          |          |          |          |          |          |          |          |          |          |          |          |          |          |          |          |          |          |          |          |          |          |          |          |          |          |          |          |          |          |          |          |          |          |          |          |          |          |          |          |          |          |          |          |          |          |          |          |          |          |          |          |          |          |          |          |          |          |          |          |          |          |          |          |          |          |          |          |          |          |          |          |          |          |          |          |          |          |          |          |          |          |          |          |          |          |          |           |           |           |           |           |           |           |           |           |           |           |
| 461.5510                                                                                                                                                                                                                                                                                                                                                                                                                                                                                                                                                                                                                                                                                                                                                                                                                                                                                                                                                                                                                                                                                                                                                                                                                                                                                                                                                                                                                                                                                                                                                                                                                                                                                                                                                                                                                                                                                                                                                                                                                                                                                                                                                                                                                                                                                                                                                                                                                                                                                                                                                                                                                                                                                        | 463.3214                                                                          | 472.3148                                                                           |          |   |   |   |          |         |          |   |          |         |         |   |          |         |         |   |          |         |          |   |          |          |         |   |          |         |          |   |          |         |          |   |          |          |         |   |          |          |         |   |          |         |          |   |          |         |          |   |          |          |         |   |          |         |          |   |         |         |         |   |         |         |         |   |         |         |          |   |         |         |         |   |         |         |         |   |         |         |          |   |         |         |          |   |         |         |         |   |         |         |         |   |         |         |          |   |         |         |         |    |         |          |          |   |          |         |          |   |          |          |          |   |          |         |          |   |          |         |          |   |          |         |          |   |          |          |          |   |          |          |          |   |          |          |         |   |          |         |          |                                                                                                                                                                                                                                                                                                                                                                                                                                                                                                                                                                                                                                                                                                                                                                                                                                                                                                                                                                                                                                                                                                                                                                                                                                                                                                                                                                                                                                                                                                                                                                                                                                                                                                                                                                                                                                                                                                                                                                                                                                                                                                                                                                                                                                                                                                                                                                                                                                                                                                                   |           |        |         |         |         |         |         |         |         |         |         |          |          |          |          |          |          |          |          |          |          |          |          |          |          |          |          |          |          |          |          |          |          |          |          |          |          |          |          |          |          |          |          |          |          |          |          |          |          |          |          |          |          |          |          |          |          |          |          |          |          |          |          |          |          |          |          |          |          |          |          |          |          |          |          |          |          |          |          |          |          |          |          |          |          |          |          |          |          |          |          |          |          |          |          |          |          |          |          |          |          |          |          |           |           |           |           |           |           |           |           |           |           |           |
| 481.5588                                                                                                                                                                                                                                                                                                                                                                                                                                                                                                                                                                                                                                                                                                                                                                                                                                                                                                                                                                                                                                                                                                                                                                                                                                                                                                                                                                                                                                                                                                                                                                                                                                                                                                                                                                                                                                                                                                                                                                                                                                                                                                                                                                                                                                                                                                                                                                                                                                                                                                                                                                                                                                                                                        | 485.9094                                                                          | 489.7265                                                                           |          |   |   |   |          |         |          |   |          |         |         |   |          |         |         |   |          |         |          |   |          |          |         |   |          |         |          |   |          |         |          |   |          |          |         |   |          |          |         |   |          |         |          |   |          |         |          |   |          |          |         |   |          |         |          |   |         |         |         |   |         |         |         |   |         |         |          |   |         |         |         |   |         |         |         |   |         |         |          |   |         |         |          |   |         |         |         |   |         |         |         |   |         |         |          |   |         |         |         |    |         |          |          |   |          |         |          |   |          |          |          |   |          |         |          |   |          |         |          |   |          |         |          |   |          |          |          |   |          |          |          |   |          |          |         |   |          |         |          |                                                                                                                                                                                                                                                                                                                                                                                                                                                                                                                                                                                                                                                                                                                                                                                                                                                                                                                                                                                                                                                                                                                                                                                                                                                                                                                                                                                                                                                                                                                                                                                                                                                                                                                                                                                                                                                                                                                                                                                                                                                                                                                                                                                                                                                                                                                                                                                                                                                                                                                   |           |        |         |         |         |         |         |         |         |         |         |          |          |          |          |          |          |          |          |          |          |          |          |          |          |          |          |          |          |          |          |          |          |          |          |          |          |          |          |          |          |          |          |          |          |          |          |          |          |          |          |          |          |          |          |          |          |          |          |          |          |          |          |          |          |          |          |          |          |          |          |          |          |          |          |          |          |          |          |          |          |          |          |          |          |          |          |          |          |          |          |          |          |          |          |          |          |          |          |          |          |          |          |           |           |           |           |           |           |           |           |           |           |           |
| 492.3358                                                                                                                                                                                                                                                                                                                                                                                                                                                                                                                                                                                                                                                                                                                                                                                                                                                                                                                                                                                                                                                                                                                                                                                                                                                                                                                                                                                                                                                                                                                                                                                                                                                                                                                                                                                                                                                                                                                                                                                                                                                                                                                                                                                                                                                                                                                                                                                                                                                                                                                                                                                                                                                                                        | 528.4799                                                                          | 534.0252                                                                           |          |   |   |   |          |         |          |   |          |         |         |   |          |         |         |   |          |         |          |   |          |          |         |   |          |         |          |   |          |         |          |   |          |          |         |   |          |          |         |   |          |         |          |   |          |         |          |   |          |          |         |   |          |         |          |   |         |         |         |   |         |         |         |   |         |         |          |   |         |         |         |   |         |         |         |   |         |         |          |   |         |         |          |   |         |         |         |   |         |         |         |   |         |         |          |   |         |         |         |    |         |          |          |   |          |         |          |   |          |          |          |   |          |         |          |   |          |         |          |   |          |         |          |   |          |          |          |   |          |          |          |   |          |          |         |   |          |         |          |                                                                                                                                                                                                                                                                                                                                                                                                                                                                                                                                                                                                                                                                                                                                                                                                                                                                                                                                                                                                                                                                                                                                                                                                                                                                                                                                                                                                                                                                                                                                                                                                                                                                                                                                                                                                                                                                                                                                                                                                                                                                                                                                                                                                                                                                                                                                                                                                                                                                                                                   |           |        |         |         |         |         |         |         |         |         |         |          |          |          |          |          |          |          |          |          |          |          |          |          |          |          |          |          |          |          |          |          |          |          |          |          |          |          |          |          |          |          |          |          |          |          |          |          |          |          |          |          |          |          |          |          |          |          |          |          |          |          |          |          |          |          |          |          |          |          |          |          |          |          |          |          |          |          |          |          |          |          |          |          |          |          |          |          |          |          |          |          |          |          |          |          |          |          |          |          |          |          |          |           |           |           |           |           |           |           |           |           |           |           |
| 543.0274                                                                                                                                                                                                                                                                                                                                                                                                                                                                                                                                                                                                                                                                                                                                                                                                                                                                                                                                                                                                                                                                                                                                                                                                                                                                                                                                                                                                                                                                                                                                                                                                                                                                                                                                                                                                                                                                                                                                                                                                                                                                                                                                                                                                                                                                                                                                                                                                                                                                                                                                                                                                                                                                                        | 548.1491                                                                          | 556.0428                                                                           |          |   |   |   |          |         |          |   |          |         |         |   |          |         |         |   |          |         |          |   |          |          |         |   |          |         |          |   |          |         |          |   |          |          |         |   |          |          |         |   |          |         |          |   |          |         |          |   |          |          |         |   |          |         |          |   |         |         |         |   |         |         |         |   |         |         |          |   |         |         |         |   |         |         |         |   |         |         |          |   |         |         |          |   |         |         |         |   |         |         |         |   |         |         |          |   |         |         |         |    |         |          |          |   |          |         |          |   |          |          |          |   |          |         |          |   |          |         |          |   |          |         |          |   |          |          |          |   |          |          |          |   |          |          |         |   |          |         |          |                                                                                                                                                                                                                                                                                                                                                                                                                                                                                                                                                                                                                                                                                                                                                                                                                                                                                                                                                                                                                                                                                                                                                                                                                                                                                                                                                                                                                                                                                                                                                                                                                                                                                                                                                                                                                                                                                                                                                                                                                                                                                                                                                                                                                                                                                                                                                                                                                                                                                                                   |           |        |         |         |         |         |         |         |         |         |         |          |          |          |          |          |          |          |          |          |          |          |          |          |          |          |          |          |          |          |          |          |          |          |          |          |          |          |          |          |          |          |          |          |          |          |          |          |          |          |          |          |          |          |          |          |          |          |          |          |          |          |          |          |          |          |          |          |          |          |          |          |          |          |          |          |          |          |          |          |          |          |          |          |          |          |          |          |          |          |          |          |          |          |          |          |          |          |          |          |          |          |          |           |           |           |           |           |           |           |           |           |           |           |
| 584.3807                                                                                                                                                                                                                                                                                                                                                                                                                                                                                                                                                                                                                                                                                                                                                                                                                                                                                                                                                                                                                                                                                                                                                                                                                                                                                                                                                                                                                                                                                                                                                                                                                                                                                                                                                                                                                                                                                                                                                                                                                                                                                                                                                                                                                                                                                                                                                                                                                                                                                                                                                                                                                                                                                        | 587.8725                                                                          | 590.3771                                                                           |          |   |   |   |          |         |          |   |          |         |         |   |          |         |         |   |          |         |          |   |          |          |         |   |          |         |          |   |          |         |          |   |          |          |         |   |          |          |         |   |          |         |          |   |          |         |          |   |          |          |         |   |          |         |          |   |         |         |         |   |         |         |         |   |         |         |          |   |         |         |         |   |         |         |         |   |         |         |          |   |         |         |          |   |         |         |         |   |         |         |         |   |         |         |          |   |         |         |         |    |         |          |          |   |          |         |          |   |          |          |          |   |          |         |          |   |          |         |          |   |          |         |          |   |          |          |          |   |          |          |          |   |          |          |         |   |          |         |          |                                                                                                                                                                                                                                                                                                                                                                                                                                                                                                                                                                                                                                                                                                                                                                                                                                                                                                                                                                                                                                                                                                                                                                                                                                                                                                                                                                                                                                                                                                                                                                                                                                                                                                                                                                                                                                                                                                                                                                                                                                                                                                                                                                                                                                                                                                                                                                                                                                                                                                                   |           |        |         |         |         |         |         |         |         |         |         |          |          |          |          |          |          |          |          |          |          |          |          |          |          |          |          |          |          |          |          |          |          |          |          |          |          |          |          |          |          |          |          |          |          |          |          |          |          |          |          |          |          |          |          |          |          |          |          |          |          |          |          |          |          |          |          |          |          |          |          |          |          |          |          |          |          |          |          |          |          |          |          |          |          |          |          |          |          |          |          |          |          |          |          |          |          |          |          |          |          |          |          |           |           |           |           |           |           |           |           |           |           |           |
| 593.9477                                                                                                                                                                                                                                                                                                                                                                                                                                                                                                                                                                                                                                                                                                                                                                                                                                                                                                                                                                                                                                                                                                                                                                                                                                                                                                                                                                                                                                                                                                                                                                                                                                                                                                                                                                                                                                                                                                                                                                                                                                                                                                                                                                                                                                                                                                                                                                                                                                                                                                                                                                                                                                                                                        | 598.9039                                                                          | 601.9684                                                                           |          |   |   |   |          |         |          |   |          |         |         |   |          |         |         |   |          |         |          |   |          |          |         |   |          |         |          |   |          |         |          |   |          |          |         |   |          |          |         |   |          |         |          |   |          |         |          |   |          |          |         |   |          |         |          |   |         |         |         |   |         |         |         |   |         |         |          |   |         |         |         |   |         |         |         |   |         |         |          |   |         |         |          |   |         |         |         |   |         |         |         |   |         |         |          |   |         |         |         |    |         |          |          |   |          |         |          |   |          |          |          |   |          |         |          |   |          |         |          |   |          |         |          |   |          |          |          |   |          |          |          |   |          |          |         |   |          |         |          |                                                                                                                                                                                                                                                                                                                                                                                                                                                                                                                                                                                                                                                                                                                                                                                                                                                                                                                                                                                                                                                                                                                                                                                                                                                                                                                                                                                                                                                                                                                                                                                                                                                                                                                                                                                                                                                                                                                                                                                                                                                                                                                                                                                                                                                                                                                                                                                                                                                                                                                   |           |        |         |         |         |         |         |         |         |         |         |          |          |          |          |          |          |          |          |          |          |          |          |          |          |          |          |          |          |          |          |          |          |          |          |          |          |          |          |          |          |          |          |          |          |          |          |          |          |          |          |          |          |          |          |          |          |          |          |          |          |          |          |          |          |          |          |          |          |          |          |          |          |          |          |          |          |          |          |          |          |          |          |          |          |          |          |          |          |          |          |          |          |          |          |          |          |          |          |          |          |          |          |           |           |           |           |           |           |           |           |           |           |           |
| 620.4400                                                                                                                                                                                                                                                                                                                                                                                                                                                                                                                                                                                                                                                                                                                                                                                                                                                                                                                                                                                                                                                                                                                                                                                                                                                                                                                                                                                                                                                                                                                                                                                                                                                                                                                                                                                                                                                                                                                                                                                                                                                                                                                                                                                                                                                                                                                                                                                                                                                                                                                                                                                                                                                                                        | 628.0745                                                                          | 631.6404                                                                           |          |   |   |   |          |         |          |   |          |         |         |   |          |         |         |   |          |         |          |   |          |          |         |   |          |         |          |   |          |         |          |   |          |          |         |   |          |          |         |   |          |         |          |   |          |         |          |   |          |          |         |   |          |         |          |   |         |         |         |   |         |         |         |   |         |         |          |   |         |         |         |   |         |         |         |   |         |         |          |   |         |         |          |   |         |         |         |   |         |         |         |   |         |         |          |   |         |         |         |    |         |          |          |   |          |         |          |   |          |          |          |   |          |         |          |   |          |         |          |   |          |         |          |   |          |          |          |   |          |          |          |   |          |          |         |   |          |         |          |                                                                                                                                                                                                                                                                                                                                                                                                                                                                                                                                                                                                                                                                                                                                                                                                                                                                                                                                                                                                                                                                                                                                                                                                                                                                                                                                                                                                                                                                                                                                                                                                                                                                                                                                                                                                                                                                                                                                                                                                                                                                                                                                                                                                                                                                                                                                                                                                                                                                                                                   |           |        |         |         |         |         |         |         |         |         |         |          |          |          |          |          |          |          |          |          |          |          |          |          |          |          |          |          |          |          |          |          |          |          |          |          |          |          |          |          |          |          |          |          |          |          |          |          |          |          |          |          |          |          |          |          |          |          |          |          |          |          |          |          |          |          |          |          |          |          |          |          |          |          |          |          |          |          |          |          |          |          |          |          |          |          |          |          |          |          |          |          |          |          |          |          |          |          |          |          |          |          |          |           |           |           |           |           |           |           |           |           |           |           |
| 675.4468                                                                                                                                                                                                                                                                                                                                                                                                                                                                                                                                                                                                                                                                                                                                                                                                                                                                                                                                                                                                                                                                                                                                                                                                                                                                                                                                                                                                                                                                                                                                                                                                                                                                                                                                                                                                                                                                                                                                                                                                                                                                                                                                                                                                                                                                                                                                                                                                                                                                                                                                                                                                                                                                                        | 676.0546                                                                          | 683.1680                                                                           |          |   |   |   |          |         |          |   |          |         |         |   |          |         |         |   |          |         |          |   |          |          |         |   |          |         |          |   |          |         |          |   |          |          |         |   |          |          |         |   |          |         |          |   |          |         |          |   |          |          |         |   |          |         |          |   |         |         |         |   |         |         |         |   |         |         |          |   |         |         |         |   |         |         |         |   |         |         |          |   |         |         |          |   |         |         |         |   |         |         |         |   |         |         |          |   |         |         |         |    |         |          |          |   |          |         |          |   |          |          |          |   |          |         |          |   |          |         |          |   |          |         |          |   |          |          |          |   |          |          |          |   |          |          |         |   |          |         |          |                                                                                                                                                                                                                                                                                                                                                                                                                                                                                                                                                                                                                                                                                                                                                                                                                                                                                                                                                                                                                                                                                                                                                                                                                                                                                                                                                                                                                                                                                                                                                                                                                                                                                                                                                                                                                                                                                                                                                                                                                                                                                                                                                                                                                                                                                                                                                                                                                                                                                                                   |           |        |         |         |         |         |         |         |         |         |         |          |          |          |          |          |          |          |          |          |          |          |          |          |          |          |          |          |          |          |          |          |          |          |          |          |          |          |          |          |          |          |          |          |          |          |          |          |          |          |          |          |          |          |          |          |          |          |          |          |          |          |          |          |          |          |          |          |          |          |          |          |          |          |          |          |          |          |          |          |          |          |          |          |          |          |          |          |          |          |          |          |          |          |          |          |          |          |          |          |          |          |          |           |           |           |           |           |           |           |           |           |           |           |
| 688.8198                                                                                                                                                                                                                                                                                                                                                                                                                                                                                                                                                                                                                                                                                                                                                                                                                                                                                                                                                                                                                                                                                                                                                                                                                                                                                                                                                                                                                                                                                                                                                                                                                                                                                                                                                                                                                                                                                                                                                                                                                                                                                                                                                                                                                                                                                                                                                                                                                                                                                                                                                                                                                                                                                        | 691.0311                                                                          | 711.0664                                                                           |          |   |   |   |          |         |          |   |          |         |         |   |          |         |         |   |          |         |          |   |          |          |         |   |          |         |          |   |          |         |          |   |          |          |         |   |          |          |         |   |          |         |          |   |          |         |          |   |          |          |         |   |          |         |          |   |         |         |         |   |         |         |         |   |         |         |          |   |         |         |         |   |         |         |         |   |         |         |          |   |         |         |          |   |         |         |         |   |         |         |         |   |         |         |          |   |         |         |         |    |         |          |          |   |          |         |          |   |          |          |          |   |          |         |          |   |          |         |          |   |          |         |          |   |          |          |          |   |          |          |          |   |          |          |         |   |          |         |          |                                                                                                                                                                                                                                                                                                                                                                                                                                                                                                                                                                                                                                                                                                                                                                                                                                                                                                                                                                                                                                                                                                                                                                                                                                                                                                                                                                                                                                                                                                                                                                                                                                                                                                                                                                                                                                                                                                                                                                                                                                                                                                                                                                                                                                                                                                                                                                                                                                                                                                                   |           |        |         |         |         |         |         |         |         |         |         |          |          |          |          |          |          |          |          |          |          |          |          |          |          |          |          |          |          |          |          |          |          |          |          |          |          |          |          |          |          |          |          |          |          |          |          |          |          |          |          |          |          |          |          |          |          |          |          |          |          |          |          |          |          |          |          |          |          |          |          |          |          |          |          |          |          |          |          |          |          |          |          |          |          |          |          |          |          |          |          |          |          |          |          |          |          |          |          |          |          |          |          |           |           |           |           |           |           |           |           |           |           |           |
| 712.3852                                                                                                                                                                                                                                                                                                                                                                                                                                                                                                                                                                                                                                                                                                                                                                                                                                                                                                                                                                                                                                                                                                                                                                                                                                                                                                                                                                                                                                                                                                                                                                                                                                                                                                                                                                                                                                                                                                                                                                                                                                                                                                                                                                                                                                                                                                                                                                                                                                                                                                                                                                                                                                                                                        | 714.2980                                                                          | 725.5709                                                                           |          |   |   |   |          |         |          |   |          |         |         |   |          |         |         |   |          |         |          |   |          |          |         |   |          |         |          |   |          |         |          |   |          |          |         |   |          |          |         |   |          |         |          |   |          |         |          |   |          |          |         |   |          |         |          |   |         |         |         |   |         |         |         |   |         |         |          |   |         |         |         |   |         |         |         |   |         |         |          |   |         |         |          |   |         |         |         |   |         |         |         |   |         |         |          |   |         |         |         |    |         |          |          |   |          |         |          |   |          |          |          |   |          |         |          |   |          |         |          |   |          |         |          |   |          |          |          |   |          |          |          |   |          |          |         |   |          |         |          |                                                                                                                                                                                                                                                                                                                                                                                                                                                                                                                                                                                                                                                                                                                                                                                                                                                                                                                                                                                                                                                                                                                                                                                                                                                                                                                                                                                                                                                                                                                                                                                                                                                                                                                                                                                                                                                                                                                                                                                                                                                                                                                                                                                                                                                                                                                                                                                                                                                                                                                   |           |        |         |         |         |         |         |         |         |         |         |          |          |          |          |          |          |          |          |          |          |          |          |          |          |          |          |          |          |          |          |          |          |          |          |          |          |          |          |          |          |          |          |          |          |          |          |          |          |          |          |          |          |          |          |          |          |          |          |          |          |          |          |          |          |          |          |          |          |          |          |          |          |          |          |          |          |          |          |          |          |          |          |          |          |          |          |          |          |          |          |          |          |          |          |          |          |          |          |          |          |          |          |           |           |           |           |           |           |           |           |           |           |           |
| 732.6501                                                                                                                                                                                                                                                                                                                                                                                                                                                                                                                                                                                                                                                                                                                                                                                                                                                                                                                                                                                                                                                                                                                                                                                                                                                                                                                                                                                                                                                                                                                                                                                                                                                                                                                                                                                                                                                                                                                                                                                                                                                                                                                                                                                                                                                                                                                                                                                                                                                                                                                                                                                                                                                                                        | 744.7709                                                                          | 755.1496                                                                           |          |   |   |   |          |         |          |   |          |         |         |   |          |         |         |   |          |         |          |   |          |          |         |   |          |         |          |   |          |         |          |   |          |          |         |   |          |          |         |   |          |         |          |   |          |         |          |   |          |          |         |   |          |         |          |   |         |         |         |   |         |         |         |   |         |         |          |   |         |         |         |   |         |         |         |   |         |         |          |   |         |         |          |   |         |         |         |   |         |         |         |   |         |         |          |   |         |         |         |    |         |          |          |   |          |         |          |   |          |          |          |   |          |         |          |   |          |         |          |   |          |         |          |   |          |          |          |   |          |          |          |   |          |          |         |   |          |         |          |                                                                                                                                                                                                                                                                                                                                                                                                                                                                                                                                                                                                                                                                                                                                                                                                                                                                                                                                                                                                                                                                                                                                                                                                                                                                                                                                                                                                                                                                                                                                                                                                                                                                                                                                                                                                                                                                                                                                                                                                                                                                                                                                                                                                                                                                                                                                                                                                                                                                                                                   |           |        |         |         |         |         |         |         |         |         |         |          |          |          |          |          |          |          |          |          |          |          |          |          |          |          |          |          |          |          |          |          |          |          |          |          |          |          |          |          |          |          |          |          |          |          |          |          |          |          |          |          |          |          |          |          |          |          |          |          |          |          |          |          |          |          |          |          |          |          |          |          |          |          |          |          |          |          |          |          |          |          |          |          |          |          |          |          |          |          |          |          |          |          |          |          |          |          |          |          |          |          |          |           |           |           |           |           |           |           |           |           |           |           |
| 756.8621                                                                                                                                                                                                                                                                                                                                                                                                                                                                                                                                                                                                                                                                                                                                                                                                                                                                                                                                                                                                                                                                                                                                                                                                                                                                                                                                                                                                                                                                                                                                                                                                                                                                                                                                                                                                                                                                                                                                                                                                                                                                                                                                                                                                                                                                                                                                                                                                                                                                                                                                                                                                                                                                                        | 766.2415                                                                          | 771.9065                                                                           |          |   |   |   |          |         |          |   |          |         |         |   |          |         |         |   |          |         |          |   |          |          |         |   |          |         |          |   |          |         |          |   |          |          |         |   |          |          |         |   |          |         |          |   |          |         |          |   |          |          |         |   |          |         |          |   |         |         |         |   |         |         |         |   |         |         |          |   |         |         |         |   |         |         |         |   |         |         |          |   |         |         |          |   |         |         |         |   |         |         |         |   |         |         |          |   |         |         |         |    |         |          |          |   |          |         |          |   |          |          |          |   |          |         |          |   |          |         |          |   |          |         |          |   |          |          |          |   |          |          |          |   |          |          |         |   |          |         |          |                                                                                                                                                                                                                                                                                                                                                                                                                                                                                                                                                                                                                                                                                                                                                                                                                                                                                                                                                                                                                                                                                                                                                                                                                                                                                                                                                                                                                                                                                                                                                                                                                                                                                                                                                                                                                                                                                                                                                                                                                                                                                                                                                                                                                                                                                                                                                                                                                                                                                                                   |           |        |         |         |         |         |         |         |         |         |         |          |          |          |          |          |          |          |          |          |          |          |          |          |          |          |          |          |          |          |          |          |          |          |          |          |          |          |          |          |          |          |          |          |          |          |          |          |          |          |          |          |          |          |          |          |          |          |          |          |          |          |          |          |          |          |          |          |          |          |          |          |          |          |          |          |          |          |          |          |          |          |          |          |          |          |          |          |          |          |          |          |          |          |          |          |          |          |          |          |          |          |          |           |           |           |           |           |           |           |           |           |           |           |
| 780.3338                                                                                                                                                                                                                                                                                                                                                                                                                                                                                                                                                                                                                                                                                                                                                                                                                                                                                                                                                                                                                                                                                                                                                                                                                                                                                                                                                                                                                                                                                                                                                                                                                                                                                                                                                                                                                                                                                                                                                                                                                                                                                                                                                                                                                                                                                                                                                                                                                                                                                                                                                                                                                                                                                        | 787.2608                                                                          | 816.2264                                                                           |          |   |   |   |          |         |          |   |          |         |         |   |          |         |         |   |          |         |          |   |          |          |         |   |          |         |          |   |          |         |          |   |          |          |         |   |          |          |         |   |          |         |          |   |          |         |          |   |          |          |         |   |          |         |          |   |         |         |         |   |         |         |         |   |         |         |          |   |         |         |         |   |         |         |         |   |         |         |          |   |         |         |          |   |         |         |         |   |         |         |         |   |         |         |          |   |         |         |         |    |         |          |          |   |          |         |          |   |          |          |          |   |          |         |          |   |          |         |          |   |          |         |          |   |          |          |          |   |          |          |          |   |          |          |         |   |          |         |          |                                                                                                                                                                                                                                                                                                                                                                                                                                                                                                                                                                                                                                                                                                                                                                                                                                                                                                                                                                                                                                                                                                                                                                                                                                                                                                                                                                                                                                                                                                                                                                                                                                                                                                                                                                                                                                                                                                                                                                                                                                                                                                                                                                                                                                                                                                                                                                                                                                                                                                                   |           |        |         |         |         |         |         |         |         |         |         |          |          |          |          |          |          |          |          |          |          |          |          |          |          |          |          |          |          |          |          |          |          |          |          |          |          |          |          |          |          |          |          |          |          |          |          |          |          |          |          |          |          |          |          |          |          |          |          |          |          |          |          |          |          |          |          |          |          |          |          |          |          |          |          |          |          |          |          |          |          |          |          |          |          |          |          |          |          |          |          |          |          |          |          |          |          |          |          |          |          |          |          |           |           |           |           |           |           |           |           |           |           |           |
| 819.0098                                                                                                                                                                                                                                                                                                                                                                                                                                                                                                                                                                                                                                                                                                                                                                                                                                                                                                                                                                                                                                                                                                                                                                                                                                                                                                                                                                                                                                                                                                                                                                                                                                                                                                                                                                                                                                                                                                                                                                                                                                                                                                                                                                                                                                                                                                                                                                                                                                                                                                                                                                                                                                                                                        | 824.1680                                                                          | 829.5089                                                                           |          |   |   |   |          |         |          |   |          |         |         |   |          |         |         |   |          |         |          |   |          |          |         |   |          |         |          |   |          |         |          |   |          |          |         |   |          |          |         |   |          |         |          |   |          |         |          |   |          |          |         |   |          |         |          |   |         |         |         |   |         |         |         |   |         |         |          |   |         |         |         |   |         |         |         |   |         |         |          |   |         |         |          |   |         |         |         |   |         |         |         |   |         |         |          |   |         |         |         |    |         |          |          |   |          |         |          |   |          |          |          |   |          |         |          |   |          |         |          |   |          |         |          |   |          |          |          |   |          |          |          |   |          |          |         |   |          |         |          |                                                                                                                                                                                                                                                                                                                                                                                                                                                                                                                                                                                                                                                                                                                                                                                                                                                                                                                                                                                                                                                                                                                                                                                                                                                                                                                                                                                                                                                                                                                                                                                                                                                                                                                                                                                                                                                                                                                                                                                                                                                                                                                                                                                                                                                                                                                                                                                                                                                                                                                   |           |        |         |         |         |         |         |         |         |         |         |          |          |          |          |          |          |          |          |          |          |          |          |          |          |          |          |          |          |          |          |          |          |          |          |          |          |          |          |          |          |          |          |          |          |          |          |          |          |          |          |          |          |          |          |          |          |          |          |          |          |          |          |          |          |          |          |          |          |          |          |          |          |          |          |          |          |          |          |          |          |          |          |          |          |          |          |          |          |          |          |          |          |          |          |          |          |          |          |          |          |          |          |           |           |           |           |           |           |           |           |           |           |           |
| 841.9506                                                                                                                                                                                                                                                                                                                                                                                                                                                                                                                                                                                                                                                                                                                                                                                                                                                                                                                                                                                                                                                                                                                                                                                                                                                                                                                                                                                                                                                                                                                                                                                                                                                                                                                                                                                                                                                                                                                                                                                                                                                                                                                                                                                                                                                                                                                                                                                                                                                                                                                                                                                                                                                                                        | 853.9786                                                                          | 855.4129                                                                           |          |   |   |   |          |         |          |   |          |         |         |   |          |         |         |   |          |         |          |   |          |          |         |   |          |         |          |   |          |         |          |   |          |          |         |   |          |          |         |   |          |         |          |   |          |         |          |   |          |          |         |   |          |         |          |   |         |         |         |   |         |         |         |   |         |         |          |   |         |         |         |   |         |         |         |   |         |         |          |   |         |         |          |   |         |         |         |   |         |         |         |   |         |         |          |   |         |         |         |    |         |          |          |   |          |         |          |   |          |          |          |   |          |         |          |   |          |         |          |   |          |         |          |   |          |          |          |   |          |          |          |   |          |          |         |   |          |         |          |                                                                                                                                                                                                                                                                                                                                                                                                                                                                                                                                                                                                                                                                                                                                                                                                                                                                                                                                                                                                                                                                                                                                                                                                                                                                                                                                                                                                                                                                                                                                                                                                                                                                                                                                                                                                                                                                                                                                                                                                                                                                                                                                                                                                                                                                                                                                                                                                                                                                                                                   |           |        |         |         |         |         |         |         |         |         |         |          |          |          |          |          |          |          |          |          |          |          |          |          |          |          |          |          |          |          |          |          |          |          |          |          |          |          |          |          |          |          |          |          |          |          |          |          |          |          |          |          |          |          |          |          |          |          |          |          |          |          |          |          |          |          |          |          |          |          |          |          |          |          |          |          |          |          |          |          |          |          |          |          |          |          |          |          |          |          |          |          |          |          |          |          |          |          |          |          |          |          |          |           |           |           |           |           |           |           |           |           |           |           |
| 857.3411                                                                                                                                                                                                                                                                                                                                                                                                                                                                                                                                                                                                                                                                                                                                                                                                                                                                                                                                                                                                                                                                                                                                                                                                                                                                                                                                                                                                                                                                                                                                                                                                                                                                                                                                                                                                                                                                                                                                                                                                                                                                                                                                                                                                                                                                                                                                                                                                                                                                                                                                                                                                                                                                                        | 861.9852                                                                          | 864.8240                                                                           |          |   |   |   |          |         |          |   |          |         |         |   |          |         |         |   |          |         |          |   |          |          |         |   |          |         |          |   |          |         |          |   |          |          |         |   |          |          |         |   |          |         |          |   |          |         |          |   |          |          |         |   |          |         |          |   |         |         |         |   |         |         |         |   |         |         |          |   |         |         |         |   |         |         |         |   |         |         |          |   |         |         |          |   |         |         |         |   |         |         |         |   |         |         |          |   |         |         |         |    |         |          |          |   |          |         |          |   |          |          |          |   |          |         |          |   |          |         |          |   |          |         |          |   |          |          |          |   |          |          |          |   |          |          |         |   |          |         |          |                                                                                                                                                                                                                                                                                                                                                                                                                                                                                                                                                                                                                                                                                                                                                                                                                                                                                                                                                                                                                                                                                                                                                                                                                                                                                                                                                                                                                                                                                                                                                                                                                                                                                                                                                                                                                                                                                                                                                                                                                                                                                                                                                                                                                                                                                                                                                                                                                                                                                                                   |           |        |         |         |         |         |         |         |         |         |         |          |          |          |          |          |          |          |          |          |          |          |          |          |          |          |          |          |          |          |          |          |          |          |          |          |          |          |          |          |          |          |          |          |          |          |          |          |          |          |          |          |          |          |          |          |          |          |          |          |          |          |          |          |          |          |          |          |          |          |          |          |          |          |          |          |          |          |          |          |          |          |          |          |          |          |          |          |          |          |          |          |          |          |          |          |          |          |          |          |          |          |          |           |           |           |           |           |           |           |           |           |           |           |
| 871.0891                                                                                                                                                                                                                                                                                                                                                                                                                                                                                                                                                                                                                                                                                                                                                                                                                                                                                                                                                                                                                                                                                                                                                                                                                                                                                                                                                                                                                                                                                                                                                                                                                                                                                                                                                                                                                                                                                                                                                                                                                                                                                                                                                                                                                                                                                                                                                                                                                                                                                                                                                                                                                                                                                        | 873.5452                                                                          | 880.1206                                                                           |          |   |   |   |          |         |          |   |          |         |         |   |          |         |         |   |          |         |          |   |          |          |         |   |          |         |          |   |          |         |          |   |          |          |         |   |          |          |         |   |          |         |          |   |          |         |          |   |          |          |         |   |          |         |          |   |         |         |         |   |         |         |         |   |         |         |          |   |         |         |         |   |         |         |         |   |         |         |          |   |         |         |          |   |         |         |         |   |         |         |         |   |         |         |          |   |         |         |         |    |         |          |          |   |          |         |          |   |          |          |          |   |          |         |          |   |          |         |          |   |          |         |          |   |          |          |          |   |          |          |          |   |          |          |         |   |          |         |          |                                                                                                                                                                                                                                                                                                                                                                                                                                                                                                                                                                                                                                                                                                                                                                                                                                                                                                                                                                                                                                                                                                                                                                                                                                                                                                                                                                                                                                                                                                                                                                                                                                                                                                                                                                                                                                                                                                                                                                                                                                                                                                                                                                                                                                                                                                                                                                                                                                                                                                                   |           |        |         |         |         |         |         |         |         |         |         |          |          |          |          |          |          |          |          |          |          |          |          |          |          |          |          |          |          |          |          |          |          |          |          |          |          |          |          |          |          |          |          |          |          |          |          |          |          |          |          |          |          |          |          |          |          |          |          |          |          |          |          |          |          |          |          |          |          |          |          |          |          |          |          |          |          |          |          |          |          |          |          |          |          |          |          |          |          |          |          |          |          |          |          |          |          |          |          |          |          |          |          |           |           |           |           |           |           |           |           |           |           |           |
| 905.8908                                                                                                                                                                                                                                                                                                                                                                                                                                                                                                                                                                                                                                                                                                                                                                                                                                                                                                                                                                                                                                                                                                                                                                                                                                                                                                                                                                                                                                                                                                                                                                                                                                                                                                                                                                                                                                                                                                                                                                                                                                                                                                                                                                                                                                                                                                                                                                                                                                                                                                                                                                                                                                                                                        | 918.9185                                                                          | 930.9491                                                                           |          |   |   |   |          |         |          |   |          |         |         |   |          |         |         |   |          |         |          |   |          |          |         |   |          |         |          |   |          |         |          |   |          |          |         |   |          |          |         |   |          |         |          |   |          |         |          |   |          |          |         |   |          |         |          |   |         |         |         |   |         |         |         |   |         |         |          |   |         |         |         |   |         |         |         |   |         |         |          |   |         |         |          |   |         |         |         |   |         |         |         |   |         |         |          |   |         |         |         |    |         |          |          |   |          |         |          |   |          |          |          |   |          |         |          |   |          |         |          |   |          |         |          |   |          |          |          |   |          |          |          |   |          |          |         |   |          |         |          |                                                                                                                                                                                                                                                                                                                                                                                                                                                                                                                                                                                                                                                                                                                                                                                                                                                                                                                                                                                                                                                                                                                                                                                                                                                                                                                                                                                                                                                                                                                                                                                                                                                                                                                                                                                                                                                                                                                                                                                                                                                                                                                                                                                                                                                                                                                                                                                                                                                                                                                   |           |        |         |         |         |         |         |         |         |         |         |          |          |          |          |          |          |          |          |          |          |          |          |          |          |          |          |          |          |          |          |          |          |          |          |          |          |          |          |          |          |          |          |          |          |          |          |          |          |          |          |          |          |          |          |          |          |          |          |          |          |          |          |          |          |          |          |          |          |          |          |          |          |          |          |          |          |          |          |          |          |          |          |          |          |          |          |          |          |          |          |          |          |          |          |          |          |          |          |          |          |          |          |           |           |           |           |           |           |           |           |           |           |           |
| 940.1284                                                                                                                                                                                                                                                                                                                                                                                                                                                                                                                                                                                                                                                                                                                                                                                                                                                                                                                                                                                                                                                                                                                                                                                                                                                                                                                                                                                                                                                                                                                                                                                                                                                                                                                                                                                                                                                                                                                                                                                                                                                                                                                                                                                                                                                                                                                                                                                                                                                                                                                                                                                                                                                                                        | 947.4639                                                                          | 950.4019                                                                           |          |   |   |   |          |         |          |   |          |         |         |   |          |         |         |   |          |         |          |   |          |          |         |   |          |         |          |   |          |         |          |   |          |          |         |   |          |          |         |   |          |         |          |   |          |         |          |   |          |          |         |   |          |         |          |   |         |         |         |   |         |         |         |   |         |         |          |   |         |         |         |   |         |         |         |   |         |         |          |   |         |         |          |   |         |         |         |   |         |         |         |   |         |         |          |   |         |         |         |    |         |          |          |   |          |         |          |   |          |          |          |   |          |         |          |   |          |         |          |   |          |         |          |   |          |          |          |   |          |          |          |   |          |          |         |   |          |         |          |                                                                                                                                                                                                                                                                                                                                                                                                                                                                                                                                                                                                                                                                                                                                                                                                                                                                                                                                                                                                                                                                                                                                                                                                                                                                                                                                                                                                                                                                                                                                                                                                                                                                                                                                                                                                                                                                                                                                                                                                                                                                                                                                                                                                                                                                                                                                                                                                                                                                                                                   |           |        |         |         |         |         |         |         |         |         |         |          |          |          |          |          |          |          |          |          |          |          |          |          |          |          |          |          |          |          |          |          |          |          |          |          |          |          |          |          |          |          |          |          |          |          |          |          |          |          |          |          |          |          |          |          |          |          |          |          |          |          |          |          |          |          |          |          |          |          |          |          |          |          |          |          |          |          |          |          |          |          |          |          |          |          |          |          |          |          |          |          |          |          |          |          |          |          |          |          |          |          |          |           |           |           |           |           |           |           |           |           |           |           |
| 959.8977                                                                                                                                                                                                                                                                                                                                                                                                                                                                                                                                                                                                                                                                                                                                                                                                                                                                                                                                                                                                                                                                                                                                                                                                                                                                                                                                                                                                                                                                                                                                                                                                                                                                                                                                                                                                                                                                                                                                                                                                                                                                                                                                                                                                                                                                                                                                                                                                                                                                                                                                                                                                                                                                                        | 980.4387                                                                          | 981.4622                                                                           |          |   |   |   |          |         |          |   |          |         |         |   |          |         |         |   |          |         |          |   |          |          |         |   |          |         |          |   |          |         |          |   |          |          |         |   |          |          |         |   |          |         |          |   |          |         |          |   |          |          |         |   |          |         |          |   |         |         |         |   |         |         |         |   |         |         |          |   |         |         |         |   |         |         |         |   |         |         |          |   |         |         |          |   |         |         |         |   |         |         |         |   |         |         |          |   |         |         |         |    |         |          |          |   |          |         |          |   |          |          |          |   |          |         |          |   |          |         |          |   |          |         |          |   |          |          |          |   |          |          |          |   |          |          |         |   |          |         |          |                                                                                                                                                                                                                                                                                                                                                                                                                                                                                                                                                                                                                                                                                                                                                                                                                                                                                                                                                                                                                                                                                                                                                                                                                                                                                                                                                                                                                                                                                                                                                                                                                                                                                                                                                                                                                                                                                                                                                                                                                                                                                                                                                                                                                                                                                                                                                                                                                                                                                                                   |           |        |         |         |         |         |         |         |         |         |         |          |          |          |          |          |          |          |          |          |          |          |          |          |          |          |          |          |          |          |          |          |          |          |          |          |          |          |          |          |          |          |          |          |          |          |          |          |          |          |          |          |          |          |          |          |          |          |          |          |          |          |          |          |          |          |          |          |          |          |          |          |          |          |          |          |          |          |          |          |          |          |          |          |          |          |          |          |          |          |          |          |          |          |          |          |          |          |          |          |          |          |          |           |           |           |           |           |           |           |           |           |           |           |
| 992.1079                                                                                                                                                                                                                                                                                                                                                                                                                                                                                                                                                                                                                                                                                                                                                                                                                                                                                                                                                                                                                                                                                                                                                                                                                                                                                                                                                                                                                                                                                                                                                                                                                                                                                                                                                                                                                                                                                                                                                                                                                                                                                                                                                                                                                                                                                                                                                                                                                                                                                                                                                                                                                                                                                        | 1006.3772                                                                         | 1008.5412                                                                          |          |   |   |   |          |         |          |   |          |         |         |   |          |         |         |   |          |         |          |   |          |          |         |   |          |         |          |   |          |         |          |   |          |          |         |   |          |          |         |   |          |         |          |   |          |         |          |   |          |          |         |   |          |         |          |   |         |         |         |   |         |         |         |   |         |         |          |   |         |         |         |   |         |         |         |   |         |         |          |   |         |         |          |   |         |         |         |   |         |         |         |   |         |         |          |   |         |         |         |    |         |          |          |   |          |         |          |   |          |          |          |   |          |         |          |   |          |         |          |   |          |         |          |   |          |          |          |   |          |          |          |   |          |          |         |   |          |         |          |                                                                                                                                                                                                                                                                                                                                                                                                                                                                                                                                                                                                                                                                                                                                                                                                                                                                                                                                                                                                                                                                                                                                                                                                                                                                                                                                                                                                                                                                                                                                                                                                                                                                                                                                                                                                                                                                                                                                                                                                                                                                                                                                                                                                                                                                                                                                                                                                                                                                                                                   |           |        |         |         |         |         |         |         |         |         |         |          |          |          |          |          |          |          |          |          |          |          |          |          |          |          |          |          |          |          |          |          |          |          |          |          |          |          |          |          |          |          |          |          |          |          |          |          |          |          |          |          |          |          |          |          |          |          |          |          |          |          |          |          |          |          |          |          |          |          |          |          |          |          |          |          |          |          |          |          |          |          |          |          |          |          |          |          |          |          |          |          |          |          |          |          |          |          |          |          |          |          |          |           |           |           |           |           |           |           |           |           |           |           |
| 1011.5502                                                                                                                                                                                                                                                                                                                                                                                                                                                                                                                                                                                                                                                                                                                                                                                                                                                                                                                                                                                                                                                                                                                                                                                                                                                                                                                                                                                                                                                                                                                                                                                                                                                                                                                                                                                                                                                                                                                                                                                                                                                                                                                                                                                                                                                                                                                                                                                                                                                                                                                                                                                                                                                                                       | 1012.2399                                                                         | 1013.9406                                                                          |          |   |   |   |          |         |          |   |          |         |         |   |          |         |         |   |          |         |          |   |          |          |         |   |          |         |          |   |          |         |          |   |          |          |         |   |          |          |         |   |          |         |          |   |          |         |          |   |          |          |         |   |          |         |          |   |         |         |         |   |         |         |         |   |         |         |          |   |         |         |         |   |         |         |         |   |         |         |          |   |         |         |          |   |         |         |         |   |         |         |         |   |         |         |          |   |         |         |         |    |         |          |          |   |          |         |          |   |          |          |          |   |          |         |          |   |          |         |          |   |          |         |          |   |          |          |          |   |          |          |          |   |          |          |         |   |          |         |          |                                                                                                                                                                                                                                                                                                                                                                                                                                                                                                                                                                                                                                                                                                                                                                                                                                                                                                                                                                                                                                                                                                                                                                                                                                                                                                                                                                                                                                                                                                                                                                                                                                                                                                                                                                                                                                                                                                                                                                                                                                                                                                                                                                                                                                                                                                                                                                                                                                                                                                                   |           |        |         |         |         |         |         |         |         |         |         |          |          |          |          |          |          |          |          |          |          |          |          |          |          |          |          |          |          |          |          |          |          |          |          |          |          |          |          |          |          |          |          |          |          |          |          |          |          |          |          |          |          |          |          |          |          |          |          |          |          |          |          |          |          |          |          |          |          |          |          |          |          |          |          |          |          |          |          |          |          |          |          |          |          |          |          |          |          |          |          |          |          |          |          |          |          |          |          |          |          |          |          |           |           |           |           |           |           |           |           |           |           |           |
| 1015.2913                                                                                                                                                                                                                                                                                                                                                                                                                                                                                                                                                                                                                                                                                                                                                                                                                                                                                                                                                                                                                                                                                                                                                                                                                                                                                                                                                                                                                                                                                                                                                                                                                                                                                                                                                                                                                                                                                                                                                                                                                                                                                                                                                                                                                                                                                                                                                                                                                                                                                                                                                                                                                                                                                       | 1018.4538                                                                         | 1020.2418                                                                          |          |   |   |   |          |         |          |   |          |         |         |   |          |         |         |   |          |         |          |   |          |          |         |   |          |         |          |   |          |         |          |   |          |          |         |   |          |          |         |   |          |         |          |   |          |         |          |   |          |          |         |   |          |         |          |   |         |         |         |   |         |         |         |   |         |         |          |   |         |         |         |   |         |         |         |   |         |         |          |   |         |         |          |   |         |         |         |   |         |         |         |   |         |         |          |   |         |         |         |    |         |          |          |   |          |         |          |   |          |          |          |   |          |         |          |   |          |         |          |   |          |         |          |   |          |          |          |   |          |          |          |   |          |          |         |   |          |         |          |                                                                                                                                                                                                                                                                                                                                                                                                                                                                                                                                                                                                                                                                                                                                                                                                                                                                                                                                                                                                                                                                                                                                                                                                                                                                                                                                                                                                                                                                                                                                                                                                                                                                                                                                                                                                                                                                                                                                                                                                                                                                                                                                                                                                                                                                                                                                                                                                                                                                                                                   |           |        |         |         |         |         |         |         |         |         |         |          |          |          |          |          |          |          |          |          |          |          |          |          |          |          |          |          |          |          |          |          |          |          |          |          |          |          |          |          |          |          |          |          |          |          |          |          |          |          |          |          |          |          |          |          |          |          |          |          |          |          |          |          |          |          |          |          |          |          |          |          |          |          |          |          |          |          |          |          |          |          |          |          |          |          |          |          |          |          |          |          |          |          |          |          |          |          |          |          |          |          |          |           |           |           |           |           |           |           |           |           |           |           |
| 1020.3967                                                                                                                                                                                                                                                                                                                                                                                                                                                                                                                                                                                                                                                                                                                                                                                                                                                                                                                                                                                                                                                                                                                                                                                                                                                                                                                                                                                                                                                                                                                                                                                                                                                                                                                                                                                                                                                                                                                                                                                                                                                                                                                                                                                                                                                                                                                                                                                                                                                                                                                                                                                                                                                                                       | 1030.1176                                                                         | 1032.5794                                                                          |          |   |   |   |          |         |          |   |          |         |         |   |          |         |         |   |          |         |          |   |          |          |         |   |          |         |          |   |          |         |          |   |          |          |         |   |          |          |         |   |          |         |          |   |          |         |          |   |          |          |         |   |          |         |          |   |         |         |         |   |         |         |         |   |         |         |          |   |         |         |         |   |         |         |         |   |         |         |          |   |         |         |          |   |         |         |         |   |         |         |         |   |         |         |          |   |         |         |         |    |         |          |          |   |          |         |          |   |          |          |          |   |          |         |          |   |          |         |          |   |          |         |          |   |          |          |          |   |          |          |          |   |          |          |         |   |          |         |          |                                                                                                                                                                                                                                                                                                                                                                                                                                                                                                                                                                                                                                                                                                                                                                                                                                                                                                                                                                                                                                                                                                                                                                                                                                                                                                                                                                                                                                                                                                                                                                                                                                                                                                                                                                                                                                                                                                                                                                                                                                                                                                                                                                                                                                                                                                                                                                                                                                                                                                                   |           |        |         |         |         |         |         |         |         |         |         |          |          |          |          |          |          |          |          |          |          |          |          |          |          |          |          |          |          |          |          |          |          |          |          |          |          |          |          |          |          |          |          |          |          |          |          |          |          |          |          |          |          |          |          |          |          |          |          |          |          |          |          |          |          |          |          |          |          |          |          |          |          |          |          |          |          |          |          |          |          |          |          |          |          |          |          |          |          |          |          |          |          |          |          |          |          |          |          |          |          |          |          |           |           |           |           |           |           |           |           |           |           |           |

|   |          |          |          |           |           |           |
|---|----------|----------|----------|-----------|-----------|-----------|
| H | -4.60015 | 3.45511  | -0.02958 | 1058.2159 | 1062.6424 | 1103.7170 |
| C | -2.47341 | -3.43094 | -0.00962 | 1113.8980 | 1117.7663 | 1131.8018 |
| H | -4.60014 | -3.45510 | -0.02964 | 1136.7437 | 1141.1824 | 1153.6924 |
| H | -5.98117 | -1.23506 | -0.05312 | 1166.9493 | 1172.4594 | 1178.5623 |
| H | -2.37687 | -4.51149 | -0.00276 | 1179.0801 | 1183.6397 | 1187.2635 |
| N | -1.38780 | 1.30028  | -0.01186 | 1187.7903 | 1192.2525 | 1227.5195 |
| N | -1.38782 | -1.30028 | -0.01191 | 1236.6725 | 1240.7077 | 1241.5360 |
| H | 0.00022  | -0.00008 | 1.45530  | 1254.9176 | 1256.5950 | 1259.3290 |
| C | -0.00001 | 3.27742  | 0.01504  | 1265.2435 | 1292.2657 | 1298.6266 |
| H | -0.00000 | 4.36099  | 0.02340  | 1300.4291 | 1324.5372 | 1329.6343 |
| C | -0.00000 | -3.27741 | 0.01489  | 1345.9614 | 1365.5445 | 1381.3824 |
| H | 0.00001  | -4.36099 | 0.02318  | 1386.5153 | 1395.8996 | 1405.6641 |
|   |          |          |          | 1407.4355 | 1414.4942 | 1426.4488 |
|   |          |          |          | 1450.8482 | 1454.8905 | 1463.6842 |
|   |          |          |          | 1468.2565 | 1471.4149 | 1477.8295 |
|   |          |          |          | 1481.7009 | 1484.5079 | 1505.6331 |
|   |          |          |          | 1511.6051 | 1516.6484 | 1520.7470 |
|   |          |          |          | 1532.9323 | 1540.5266 | 1542.0754 |
|   |          |          |          | 1553.9608 | 1563.2169 | 1574.1403 |
|   |          |          |          | 1614.5088 | 1630.7424 | 1648.8634 |
|   |          |          |          | 1656.9219 | 1672.6380 | 1675.9165 |
|   |          |          |          | 1686.9200 | 1688.9713 | 1691.0878 |
|   |          |          |          | 1699.9359 | 1704.0076 | 1711.4984 |
|   |          |          |          | 3186.5187 | 3190.7228 | 3202.9988 |
|   |          |          |          | 3203.1564 | 3205.9014 | 3206.3048 |
|   |          |          |          | 3207.0165 | 3209.5779 | 3214.0308 |
|   |          |          |          | 3214.7501 | 3215.0096 | 3218.3441 |
|   |          |          |          | 3219.5972 | 3222.6703 | 3222.8392 |
|   |          |          |          | 3224.5536 | 3227.9742 | 3229.0613 |
|   |          |          |          | 3232.3504 | 3233.5837 | 3233.9358 |
|   |          |          |          | 3237.2237 | 3239.1069 | 3300.2057 |

### Statistical Thermodynamic Analysis

Temperature = 403.15 K

Pressure = 1 atm

Zero-point correction = 0.541630

Electronic Energy = -1955.73132475

Internal Energy (E) = -1955.12836375

Enthalpy (H) = -1955.12708675

Gibbs Free Energy (G) = -1955.29476775

Gibbs Free Energy of Solvation = -1955.36959807

| St. Pt.           | General Structure | Ball & Stick model |
|-------------------|-------------------|--------------------|
| 13 <sup>Hyd</sup> |                   |                    |

| Cartesian coordinate |          |          |          | Frequencies |           |           |
|----------------------|----------|----------|----------|-------------|-----------|-----------|
| Atoms                | X        | Y        | Z        |             |           |           |
|                      |          |          |          | 19.4448     | 27.5809   | 37.6813   |
|                      |          |          |          | 46.4756     | 53.3023   | 54.4404   |
|                      |          |          |          | 57.4807     | 64.2098   | 68.5664   |
|                      |          |          |          | 87.9497     | 104.7702  | 110.1909  |
|                      |          |          |          | 130.4363    | 135.9887  | 139.4374  |
| N                    | -0.36540 | 1.54303  | -0.20810 | 167.2438    | 177.1036  | 192.3232  |
| N                    | -0.94090 | 0.62812  | 0.41698  | 209.8241    | 221.4669  | 239.2424  |
| C                    | -2.34640 | 0.54230  | 0.21341  | 248.1260    | 255.2523  | 258.9256  |
| C                    | -3.06482 | 1.38661  | -0.64205 | 272.8016    | 279.9726  | 297.3053  |
| C                    | -2.99530 | -0.46633 | 0.92784  | 300.3534    | 315.4089  | 325.2468  |
| C                    | -4.43204 | 1.20114  | -0.77872 | 342.1474    | 353.9038  | 354.7152  |
| H                    | -2.54390 | 2.17073  | -1.17886 | 366.6329    | 381.0447  | 403.1229  |
| C                    | -4.36764 | -0.64278 | 0.78822  | 406.6160    | 408.3249  | 425.6365  |
| H                    | -2.41579 | -1.08523 | 1.60713  | 438.1048    | 447.7895  | 458.7892  |
| C                    | -5.08375 | 0.18956  | -0.06765 | 464.3681    | 470.5991  | 477.0089  |
| H                    | -5.00017 | 1.84900  | -1.43752 | 486.4072    | 490.3234  | 492.8506  |
| H                    | -4.87690 | -1.41985 | 1.34743  | 496.2691    | 526.5252  | 529.2807  |
| H                    | -6.15469 | 0.05672  | -0.17966 | 535.4169    | 554.1306  | 556.5724  |
| C                    | 1.03275  | 1.60972  | 0.04286  | 580.7449    | 584.7728  | 585.9245  |
| C                    | 1.58869  | 1.31970  | 1.29532  | 594.3136    | 596.7576  | 599.3381  |
| C                    | 1.84875  | 1.98202  | -1.02740 | 600.8014    | 626.2231  | 627.9081  |
| C                    | 2.97003  | 1.36227  | 1.45493  | 651.7595    | 676.7700  | 684.0313  |
| H                    | 0.92854  | 1.09680  | 2.12790  | 687.5130    | 710.4803  | 712.5688  |
| C                    | 3.23170  | 1.99738  | -0.86467 | 718.4098    | 721.3430  | 723.1960  |
| H                    | 1.38538  | 2.24928  | -1.97212 | 729.8228    | 744.6903  | 751.1661  |
| C                    | 3.79323  | 1.68392  | 0.37297  | 759.2960    | 766.2599  | 767.3850  |
| H                    | 3.40717  | 1.16948  | 2.42960  | 780.2872    | 780.7813  | 807.2966  |
| H                    | 3.86928  | 2.27642  | -1.69672 | 815.9928    | 821.6906  | 824.6265  |
| H                    | 4.86928  | 1.72260  | 0.50506  | 831.5377    | 832.9381  | 851.2268  |
| Cs                   | 1.13863  | -1.78685 | -0.24190 | 858.5656    | 862.1785  | 864.1504  |
| C                    | -2.47342 | 3.43093  | -0.00949 | 872.4430    | 874.3499  | 881.5130  |
| C                    | -3.82339 | -1.41770 | -0.02924 | 897.5756    | 907.2640  | 920.0598  |
| C                    | -5.04390 | 0.68674  | -0.04268 | 929.1493    | 936.1214  | 939.8330  |
| C                    | -3.70087 | 2.84513  | -0.02388 | 947.4483    | 978.6598  | 982.5593  |
| H                    | -2.37687 | 4.51148  | -0.00260 | 988.9373    | 999.3196  | 1001.3202 |
| C                    | -3.70086 | -2.84511 | -0.02396 | 1003.1748   | 1004.2579 | 1009.8309 |
| C                    | -5.04390 | -0.68672 | -0.04268 | 1010.8798   | 1011.1105 | 1015.8632 |
| C                    | -1.25756 | -2.64674 | 0.00047  | 1016.9554   | 1019.5178 | 1024.4819 |
| H                    | -5.98116 | 1.23509  | -0.05313 | 1039.5908   | 1064.3848 | 1083.3171 |
| H                    | -4.60015 | 3.45511  | -0.02958 | 1108.9148   | 1115.4438 | 1133.5234 |
| C                    | -2.47341 | -3.43094 | -0.00962 | 1141.2259   | 1155.9429 | 1166.3137 |
| H                    | -4.60014 | -3.45510 | -0.02964 | 1171.0251   | 1171.8581 | 1173.1990 |
| H                    | -5.98117 | -1.23506 | -0.05312 | 1176.6120   | 1180.0382 | 1184.6219 |
| H                    | -2.37687 | -4.51149 | -0.00276 | 1193.9958   | 1196.9477 | 1228.2613 |
| N                    | -1.38780 | 1.30028  | -0.01186 | 1240.6690   | 1243.5724 | 1246.4158 |
| N                    | -1.38782 | -1.30028 | -0.01191 | 1256.3803   | 1258.4592 | 1273.9354 |
| H                    | 0.00022  | -0.00008 | 1.45530  | 1291.0597   | 1298.0789 | 1300.2135 |
| C                    | -0.00001 | 3.27742  | 0.01504  | 1316.0754   | 1327.1688 | 1343.3337 |
| H                    | -0.00000 | 4.36099  | 0.02340  | 1363.2199   | 1383.1963 | 1386.4858 |
| C                    | -0.00000 | -3.27741 | 0.01489  | 1398.5637   | 1413.6703 | 1420.2327 |
| H                    | 0.00001  | -4.36099 | 0.02318  | 1422.8050   | 1432.3891 | 1451.1962 |
|                      |          |          |          | 1458.0621   | 1462.1537 | 1467.2399 |
|                      |          |          |          | 1470.2349   | 1473.7316 | 1477.8819 |

|  |           |           |           |
|--|-----------|-----------|-----------|
|  | 1480.1419 | 1487.2797 | 1488.6408 |
|  | 1516.8862 | 1526.1338 | 1531.5446 |
|  | 1556.7004 | 1561.9613 | 1567.7288 |
|  | 1575.1054 | 1620.8366 | 1621.8035 |
|  | 1633.6930 | 1654.5416 | 1655.8259 |
|  | 1673.0314 | 1677.5969 | 1696.3379 |
|  | 1696.5241 | 1700.8270 | 1707.1695 |
|  | 1716.5439 | 1721.8045 | 3139.5768 |
|  | 3179.6592 | 3185.6548 | 3203.4031 |
|  | 3203.8010 | 3204.3398 | 3204.8511 |
|  | 3205.7454 | 3208.7829 | 3210.6993 |
|  | 3210.9809 | 3211.9441 | 3212.9052 |
|  | 3217.9081 | 3221.0286 | 3223.1561 |
|  | 3223.8528 | 3226.0206 | 3226.4067 |
|  | 3227.3408 | 3229.1182 | 3229.4038 |
|  | 3234.0933 | 3243.5165 | 3598.6290 |

### Statistical Thermodynamic Analysis

Temperature = 403.15 K

Pressure = 1 atm

Zero-point correction = 0.547634

Electronic Energy = -1955.76038242

Internal Energy (E) = -1955.15108942

Enthalpy (H) = -1955.14981242

Gibbs Free Energy (G)=-1955.31663442

Gibbs Free Energy of Solvation = -1955.39078054

| St. Pt.                                                                                                                                                                                                                                                                                                                                                                                                                                                                                                                                                                                                                                                                                                                                                                                                                                                                                                                                                                                                                                                                                            | General Structure                                                                   | Ball & Stick model                                                                   |          |   |   |   |          |          |          |   |          |          |          |   |          |          |          |   |          |          |         |   |          |          |         |   |          |          |          |   |          |         |         |   |          |         |          |   |          |         |          |   |          |         |          |   |          |         |          |   |          |         |          |   |          |         |         |                                                                                                                                                                                                                                                                                                                                                                                                                                                                                                                                                                                                                                                                                                                                                                                                                                                                                                                                                                                                                                                                                                                        |         |         |         |          |          |          |          |          |          |          |          |          |          |          |          |          |          |          |          |          |          |          |          |          |          |          |          |          |          |          |          |          |          |          |          |          |          |          |          |          |          |          |          |          |          |          |          |          |          |          |          |
|----------------------------------------------------------------------------------------------------------------------------------------------------------------------------------------------------------------------------------------------------------------------------------------------------------------------------------------------------------------------------------------------------------------------------------------------------------------------------------------------------------------------------------------------------------------------------------------------------------------------------------------------------------------------------------------------------------------------------------------------------------------------------------------------------------------------------------------------------------------------------------------------------------------------------------------------------------------------------------------------------------------------------------------------------------------------------------------------------|-------------------------------------------------------------------------------------|--------------------------------------------------------------------------------------|----------|---|---|---|----------|----------|----------|---|----------|----------|----------|---|----------|----------|----------|---|----------|----------|---------|---|----------|----------|---------|---|----------|----------|----------|---|----------|---------|---------|---|----------|---------|----------|---|----------|---------|----------|---|----------|---------|----------|---|----------|---------|----------|---|----------|---------|----------|---|----------|---------|---------|------------------------------------------------------------------------------------------------------------------------------------------------------------------------------------------------------------------------------------------------------------------------------------------------------------------------------------------------------------------------------------------------------------------------------------------------------------------------------------------------------------------------------------------------------------------------------------------------------------------------------------------------------------------------------------------------------------------------------------------------------------------------------------------------------------------------------------------------------------------------------------------------------------------------------------------------------------------------------------------------------------------------------------------------------------------------------------------------------------------------|---------|---------|---------|----------|----------|----------|----------|----------|----------|----------|----------|----------|----------|----------|----------|----------|----------|----------|----------|----------|----------|----------|----------|----------|----------|----------|----------|----------|----------|----------|----------|----------|----------|----------|----------|----------|----------|----------|----------|----------|----------|----------|----------|----------|----------|----------|----------|----------|----------|----------|----------|
| <b>I2</b> <sup>Hyd1(MLC)/</sup><br><b>I2</b> <sup>Hyd2(MLC)</sup>                                                                                                                                                                                                                                                                                                                                                                                                                                                                                                                                                                                                                                                                                                                                                                                                                                                                                                                                                                                                                                  | 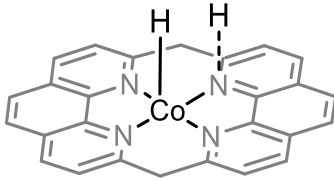 |  |          |   |   |   |          |          |          |   |          |          |          |   |          |          |          |   |          |          |         |   |          |          |         |   |          |          |          |   |          |         |         |   |          |         |          |   |          |         |          |   |          |         |          |   |          |         |          |   |          |         |          |   |          |         |         |                                                                                                                                                                                                                                                                                                                                                                                                                                                                                                                                                                                                                                                                                                                                                                                                                                                                                                                                                                                                                                                                                                                        |         |         |         |          |          |          |          |          |          |          |          |          |          |          |          |          |          |          |          |          |          |          |          |          |          |          |          |          |          |          |          |          |          |          |          |          |          |          |          |          |          |          |          |          |          |          |          |          |          |          |          |
| <b>Cartesian coordinate</b>                                                                                                                                                                                                                                                                                                                                                                                                                                                                                                                                                                                                                                                                                                                                                                                                                                                                                                                                                                                                                                                                        |                                                                                     | <b>Frequencies</b>                                                                   |          |   |   |   |          |          |          |   |          |          |          |   |          |          |          |   |          |          |         |   |          |          |         |   |          |          |          |   |          |         |         |   |          |         |          |   |          |         |          |   |          |         |          |   |          |         |          |   |          |         |          |   |          |         |         |                                                                                                                                                                                                                                                                                                                                                                                                                                                                                                                                                                                                                                                                                                                                                                                                                                                                                                                                                                                                                                                                                                                        |         |         |         |          |          |          |          |          |          |          |          |          |          |          |          |          |          |          |          |          |          |          |          |          |          |          |          |          |          |          |          |          |          |          |          |          |          |          |          |          |          |          |          |          |          |          |          |          |          |          |          |
| <p>-----</p> <table border="1"> <thead> <tr> <th>Atoms</th> <th>X</th> <th>Y</th> <th>Z</th> </tr> </thead> <tbody> <tr><td>C</td><td>-2.51797</td><td>-3.44611</td><td>-0.08264</td></tr> <tr><td>C</td><td>-3.72170</td><td>-2.83222</td><td>-0.09791</td></tr> <tr><td>C</td><td>-3.83259</td><td>-1.37874</td><td>-0.05431</td></tr> <tr><td>C</td><td>-2.66670</td><td>-0.66553</td><td>0.14755</td></tr> <tr><td>C</td><td>-1.27352</td><td>-2.70648</td><td>0.06602</td></tr> <tr><td>C</td><td>-5.02076</td><td>-0.65011</td><td>-0.28282</td></tr> <tr><td>C</td><td>-2.60569</td><td>0.72710</td><td>0.05641</td></tr> <tr><td>C</td><td>-3.79629</td><td>1.44958</td><td>-0.14051</td></tr> <tr><td>C</td><td>-5.00019</td><td>0.73223</td><td>-0.30016</td></tr> <tr><td>C</td><td>-3.65977</td><td>2.87854</td><td>-0.18581</td></tr> <tr><td>H</td><td>-4.54724</td><td>3.49193</td><td>-0.30971</td></tr> <tr><td>C</td><td>-2.43457</td><td>3.45160</td><td>-0.08165</td></tr> <tr><td>C</td><td>-1.22795</td><td>2.65855</td><td>0.04657</td></tr> </tbody> </table> <p>-----</p> |                                                                                     | Atoms                                                                                | X        | Y | Z | C | -2.51797 | -3.44611 | -0.08264 | C | -3.72170 | -2.83222 | -0.09791 | C | -3.83259 | -1.37874 | -0.05431 | C | -2.66670 | -0.66553 | 0.14755 | C | -1.27352 | -2.70648 | 0.06602 | C | -5.02076 | -0.65011 | -0.28282 | C | -2.60569 | 0.72710 | 0.05641 | C | -3.79629 | 1.44958 | -0.14051 | C | -5.00019 | 0.73223 | -0.30016 | C | -3.65977 | 2.87854 | -0.18581 | H | -4.54724 | 3.49193 | -0.30971 | C | -2.43457 | 3.45160 | -0.08165 | C | -1.22795 | 2.65855 | 0.04657 | <table border="1"> <tbody> <tr><td>48.3606</td><td>60.8641</td><td>95.6061</td></tr> <tr><td>122.4633</td><td>150.3820</td><td>160.1210</td></tr> <tr><td>208.4525</td><td>235.6481</td><td>238.4646</td></tr> <tr><td>246.9020</td><td>249.3949</td><td>260.5137</td></tr> <tr><td>275.2453</td><td>301.8042</td><td>318.5522</td></tr> <tr><td>335.0754</td><td>342.6053</td><td>374.7917</td></tr> <tr><td>391.8667</td><td>400.5610</td><td>406.4440</td></tr> <tr><td>445.2387</td><td>449.2125</td><td>454.6019</td></tr> <tr><td>471.6689</td><td>479.0623</td><td>483.7753</td></tr> <tr><td>489.6753</td><td>500.0564</td><td>535.8009</td></tr> <tr><td>551.6620</td><td>558.9286</td><td>583.0300</td></tr> <tr><td>583.9880</td><td>592.4817</td><td>600.2536</td></tr> <tr><td>617.4134</td><td>655.5121</td><td>664.7998</td></tr> <tr><td>685.1051</td><td>699.3269</td><td>708.4269</td></tr> <tr><td>710.5393</td><td>717.7293</td><td>724.2741</td></tr> <tr><td>741.9330</td><td>756.3664</td><td>765.4903</td></tr> <tr><td>771.8345</td><td>783.3393</td><td>810.1790</td></tr> </tbody> </table> | 48.3606 | 60.8641 | 95.6061 | 122.4633 | 150.3820 | 160.1210 | 208.4525 | 235.6481 | 238.4646 | 246.9020 | 249.3949 | 260.5137 | 275.2453 | 301.8042 | 318.5522 | 335.0754 | 342.6053 | 374.7917 | 391.8667 | 400.5610 | 406.4440 | 445.2387 | 449.2125 | 454.6019 | 471.6689 | 479.0623 | 483.7753 | 489.6753 | 500.0564 | 535.8009 | 551.6620 | 558.9286 | 583.0300 | 583.9880 | 592.4817 | 600.2536 | 617.4134 | 655.5121 | 664.7998 | 685.1051 | 699.3269 | 708.4269 | 710.5393 | 717.7293 | 724.2741 | 741.9330 | 756.3664 | 765.4903 | 771.8345 | 783.3393 | 810.1790 |
| Atoms                                                                                                                                                                                                                                                                                                                                                                                                                                                                                                                                                                                                                                                                                                                                                                                                                                                                                                                                                                                                                                                                                              | X                                                                                   | Y                                                                                    | Z        |   |   |   |          |          |          |   |          |          |          |   |          |          |          |   |          |          |         |   |          |          |         |   |          |          |          |   |          |         |         |   |          |         |          |   |          |         |          |   |          |         |          |   |          |         |          |   |          |         |          |   |          |         |         |                                                                                                                                                                                                                                                                                                                                                                                                                                                                                                                                                                                                                                                                                                                                                                                                                                                                                                                                                                                                                                                                                                                        |         |         |         |          |          |          |          |          |          |          |          |          |          |          |          |          |          |          |          |          |          |          |          |          |          |          |          |          |          |          |          |          |          |          |          |          |          |          |          |          |          |          |          |          |          |          |          |          |          |          |          |
| C                                                                                                                                                                                                                                                                                                                                                                                                                                                                                                                                                                                                                                                                                                                                                                                                                                                                                                                                                                                                                                                                                                  | -2.51797                                                                            | -3.44611                                                                             | -0.08264 |   |   |   |          |          |          |   |          |          |          |   |          |          |          |   |          |          |         |   |          |          |         |   |          |          |          |   |          |         |         |   |          |         |          |   |          |         |          |   |          |         |          |   |          |         |          |   |          |         |          |   |          |         |         |                                                                                                                                                                                                                                                                                                                                                                                                                                                                                                                                                                                                                                                                                                                                                                                                                                                                                                                                                                                                                                                                                                                        |         |         |         |          |          |          |          |          |          |          |          |          |          |          |          |          |          |          |          |          |          |          |          |          |          |          |          |          |          |          |          |          |          |          |          |          |          |          |          |          |          |          |          |          |          |          |          |          |          |          |          |
| C                                                                                                                                                                                                                                                                                                                                                                                                                                                                                                                                                                                                                                                                                                                                                                                                                                                                                                                                                                                                                                                                                                  | -3.72170                                                                            | -2.83222                                                                             | -0.09791 |   |   |   |          |          |          |   |          |          |          |   |          |          |          |   |          |          |         |   |          |          |         |   |          |          |          |   |          |         |         |   |          |         |          |   |          |         |          |   |          |         |          |   |          |         |          |   |          |         |          |   |          |         |         |                                                                                                                                                                                                                                                                                                                                                                                                                                                                                                                                                                                                                                                                                                                                                                                                                                                                                                                                                                                                                                                                                                                        |         |         |         |          |          |          |          |          |          |          |          |          |          |          |          |          |          |          |          |          |          |          |          |          |          |          |          |          |          |          |          |          |          |          |          |          |          |          |          |          |          |          |          |          |          |          |          |          |          |          |          |
| C                                                                                                                                                                                                                                                                                                                                                                                                                                                                                                                                                                                                                                                                                                                                                                                                                                                                                                                                                                                                                                                                                                  | -3.83259                                                                            | -1.37874                                                                             | -0.05431 |   |   |   |          |          |          |   |          |          |          |   |          |          |          |   |          |          |         |   |          |          |         |   |          |          |          |   |          |         |         |   |          |         |          |   |          |         |          |   |          |         |          |   |          |         |          |   |          |         |          |   |          |         |         |                                                                                                                                                                                                                                                                                                                                                                                                                                                                                                                                                                                                                                                                                                                                                                                                                                                                                                                                                                                                                                                                                                                        |         |         |         |          |          |          |          |          |          |          |          |          |          |          |          |          |          |          |          |          |          |          |          |          |          |          |          |          |          |          |          |          |          |          |          |          |          |          |          |          |          |          |          |          |          |          |          |          |          |          |          |
| C                                                                                                                                                                                                                                                                                                                                                                                                                                                                                                                                                                                                                                                                                                                                                                                                                                                                                                                                                                                                                                                                                                  | -2.66670                                                                            | -0.66553                                                                             | 0.14755  |   |   |   |          |          |          |   |          |          |          |   |          |          |          |   |          |          |         |   |          |          |         |   |          |          |          |   |          |         |         |   |          |         |          |   |          |         |          |   |          |         |          |   |          |         |          |   |          |         |          |   |          |         |         |                                                                                                                                                                                                                                                                                                                                                                                                                                                                                                                                                                                                                                                                                                                                                                                                                                                                                                                                                                                                                                                                                                                        |         |         |         |          |          |          |          |          |          |          |          |          |          |          |          |          |          |          |          |          |          |          |          |          |          |          |          |          |          |          |          |          |          |          |          |          |          |          |          |          |          |          |          |          |          |          |          |          |          |          |          |
| C                                                                                                                                                                                                                                                                                                                                                                                                                                                                                                                                                                                                                                                                                                                                                                                                                                                                                                                                                                                                                                                                                                  | -1.27352                                                                            | -2.70648                                                                             | 0.06602  |   |   |   |          |          |          |   |          |          |          |   |          |          |          |   |          |          |         |   |          |          |         |   |          |          |          |   |          |         |         |   |          |         |          |   |          |         |          |   |          |         |          |   |          |         |          |   |          |         |          |   |          |         |         |                                                                                                                                                                                                                                                                                                                                                                                                                                                                                                                                                                                                                                                                                                                                                                                                                                                                                                                                                                                                                                                                                                                        |         |         |         |          |          |          |          |          |          |          |          |          |          |          |          |          |          |          |          |          |          |          |          |          |          |          |          |          |          |          |          |          |          |          |          |          |          |          |          |          |          |          |          |          |          |          |          |          |          |          |          |
| C                                                                                                                                                                                                                                                                                                                                                                                                                                                                                                                                                                                                                                                                                                                                                                                                                                                                                                                                                                                                                                                                                                  | -5.02076                                                                            | -0.65011                                                                             | -0.28282 |   |   |   |          |          |          |   |          |          |          |   |          |          |          |   |          |          |         |   |          |          |         |   |          |          |          |   |          |         |         |   |          |         |          |   |          |         |          |   |          |         |          |   |          |         |          |   |          |         |          |   |          |         |         |                                                                                                                                                                                                                                                                                                                                                                                                                                                                                                                                                                                                                                                                                                                                                                                                                                                                                                                                                                                                                                                                                                                        |         |         |         |          |          |          |          |          |          |          |          |          |          |          |          |          |          |          |          |          |          |          |          |          |          |          |          |          |          |          |          |          |          |          |          |          |          |          |          |          |          |          |          |          |          |          |          |          |          |          |          |
| C                                                                                                                                                                                                                                                                                                                                                                                                                                                                                                                                                                                                                                                                                                                                                                                                                                                                                                                                                                                                                                                                                                  | -2.60569                                                                            | 0.72710                                                                              | 0.05641  |   |   |   |          |          |          |   |          |          |          |   |          |          |          |   |          |          |         |   |          |          |         |   |          |          |          |   |          |         |         |   |          |         |          |   |          |         |          |   |          |         |          |   |          |         |          |   |          |         |          |   |          |         |         |                                                                                                                                                                                                                                                                                                                                                                                                                                                                                                                                                                                                                                                                                                                                                                                                                                                                                                                                                                                                                                                                                                                        |         |         |         |          |          |          |          |          |          |          |          |          |          |          |          |          |          |          |          |          |          |          |          |          |          |          |          |          |          |          |          |          |          |          |          |          |          |          |          |          |          |          |          |          |          |          |          |          |          |          |          |
| C                                                                                                                                                                                                                                                                                                                                                                                                                                                                                                                                                                                                                                                                                                                                                                                                                                                                                                                                                                                                                                                                                                  | -3.79629                                                                            | 1.44958                                                                              | -0.14051 |   |   |   |          |          |          |   |          |          |          |   |          |          |          |   |          |          |         |   |          |          |         |   |          |          |          |   |          |         |         |   |          |         |          |   |          |         |          |   |          |         |          |   |          |         |          |   |          |         |          |   |          |         |         |                                                                                                                                                                                                                                                                                                                                                                                                                                                                                                                                                                                                                                                                                                                                                                                                                                                                                                                                                                                                                                                                                                                        |         |         |         |          |          |          |          |          |          |          |          |          |          |          |          |          |          |          |          |          |          |          |          |          |          |          |          |          |          |          |          |          |          |          |          |          |          |          |          |          |          |          |          |          |          |          |          |          |          |          |          |
| C                                                                                                                                                                                                                                                                                                                                                                                                                                                                                                                                                                                                                                                                                                                                                                                                                                                                                                                                                                                                                                                                                                  | -5.00019                                                                            | 0.73223                                                                              | -0.30016 |   |   |   |          |          |          |   |          |          |          |   |          |          |          |   |          |          |         |   |          |          |         |   |          |          |          |   |          |         |         |   |          |         |          |   |          |         |          |   |          |         |          |   |          |         |          |   |          |         |          |   |          |         |         |                                                                                                                                                                                                                                                                                                                                                                                                                                                                                                                                                                                                                                                                                                                                                                                                                                                                                                                                                                                                                                                                                                                        |         |         |         |          |          |          |          |          |          |          |          |          |          |          |          |          |          |          |          |          |          |          |          |          |          |          |          |          |          |          |          |          |          |          |          |          |          |          |          |          |          |          |          |          |          |          |          |          |          |          |          |
| C                                                                                                                                                                                                                                                                                                                                                                                                                                                                                                                                                                                                                                                                                                                                                                                                                                                                                                                                                                                                                                                                                                  | -3.65977                                                                            | 2.87854                                                                              | -0.18581 |   |   |   |          |          |          |   |          |          |          |   |          |          |          |   |          |          |         |   |          |          |         |   |          |          |          |   |          |         |         |   |          |         |          |   |          |         |          |   |          |         |          |   |          |         |          |   |          |         |          |   |          |         |         |                                                                                                                                                                                                                                                                                                                                                                                                                                                                                                                                                                                                                                                                                                                                                                                                                                                                                                                                                                                                                                                                                                                        |         |         |         |          |          |          |          |          |          |          |          |          |          |          |          |          |          |          |          |          |          |          |          |          |          |          |          |          |          |          |          |          |          |          |          |          |          |          |          |          |          |          |          |          |          |          |          |          |          |          |          |
| H                                                                                                                                                                                                                                                                                                                                                                                                                                                                                                                                                                                                                                                                                                                                                                                                                                                                                                                                                                                                                                                                                                  | -4.54724                                                                            | 3.49193                                                                              | -0.30971 |   |   |   |          |          |          |   |          |          |          |   |          |          |          |   |          |          |         |   |          |          |         |   |          |          |          |   |          |         |         |   |          |         |          |   |          |         |          |   |          |         |          |   |          |         |          |   |          |         |          |   |          |         |         |                                                                                                                                                                                                                                                                                                                                                                                                                                                                                                                                                                                                                                                                                                                                                                                                                                                                                                                                                                                                                                                                                                                        |         |         |         |          |          |          |          |          |          |          |          |          |          |          |          |          |          |          |          |          |          |          |          |          |          |          |          |          |          |          |          |          |          |          |          |          |          |          |          |          |          |          |          |          |          |          |          |          |          |          |          |
| C                                                                                                                                                                                                                                                                                                                                                                                                                                                                                                                                                                                                                                                                                                                                                                                                                                                                                                                                                                                                                                                                                                  | -2.43457                                                                            | 3.45160                                                                              | -0.08165 |   |   |   |          |          |          |   |          |          |          |   |          |          |          |   |          |          |         |   |          |          |         |   |          |          |          |   |          |         |         |   |          |         |          |   |          |         |          |   |          |         |          |   |          |         |          |   |          |         |          |   |          |         |         |                                                                                                                                                                                                                                                                                                                                                                                                                                                                                                                                                                                                                                                                                                                                                                                                                                                                                                                                                                                                                                                                                                                        |         |         |         |          |          |          |          |          |          |          |          |          |          |          |          |          |          |          |          |          |          |          |          |          |          |          |          |          |          |          |          |          |          |          |          |          |          |          |          |          |          |          |          |          |          |          |          |          |          |          |          |
| C                                                                                                                                                                                                                                                                                                                                                                                                                                                                                                                                                                                                                                                                                                                                                                                                                                                                                                                                                                                                                                                                                                  | -1.22795                                                                            | 2.65855                                                                              | 0.04657  |   |   |   |          |          |          |   |          |          |          |   |          |          |          |   |          |          |         |   |          |          |         |   |          |          |          |   |          |         |         |   |          |         |          |   |          |         |          |   |          |         |          |   |          |         |          |   |          |         |          |   |          |         |         |                                                                                                                                                                                                                                                                                                                                                                                                                                                                                                                                                                                                                                                                                                                                                                                                                                                                                                                                                                                                                                                                                                                        |         |         |         |          |          |          |          |          |          |          |          |          |          |          |          |          |          |          |          |          |          |          |          |          |          |          |          |          |          |          |          |          |          |          |          |          |          |          |          |          |          |          |          |          |          |          |          |          |          |          |          |
| 48.3606                                                                                                                                                                                                                                                                                                                                                                                                                                                                                                                                                                                                                                                                                                                                                                                                                                                                                                                                                                                                                                                                                            | 60.8641                                                                             | 95.6061                                                                              |          |   |   |   |          |          |          |   |          |          |          |   |          |          |          |   |          |          |         |   |          |          |         |   |          |          |          |   |          |         |         |   |          |         |          |   |          |         |          |   |          |         |          |   |          |         |          |   |          |         |          |   |          |         |         |                                                                                                                                                                                                                                                                                                                                                                                                                                                                                                                                                                                                                                                                                                                                                                                                                                                                                                                                                                                                                                                                                                                        |         |         |         |          |          |          |          |          |          |          |          |          |          |          |          |          |          |          |          |          |          |          |          |          |          |          |          |          |          |          |          |          |          |          |          |          |          |          |          |          |          |          |          |          |          |          |          |          |          |          |          |
| 122.4633                                                                                                                                                                                                                                                                                                                                                                                                                                                                                                                                                                                                                                                                                                                                                                                                                                                                                                                                                                                                                                                                                           | 150.3820                                                                            | 160.1210                                                                             |          |   |   |   |          |          |          |   |          |          |          |   |          |          |          |   |          |          |         |   |          |          |         |   |          |          |          |   |          |         |         |   |          |         |          |   |          |         |          |   |          |         |          |   |          |         |          |   |          |         |          |   |          |         |         |                                                                                                                                                                                                                                                                                                                                                                                                                                                                                                                                                                                                                                                                                                                                                                                                                                                                                                                                                                                                                                                                                                                        |         |         |         |          |          |          |          |          |          |          |          |          |          |          |          |          |          |          |          |          |          |          |          |          |          |          |          |          |          |          |          |          |          |          |          |          |          |          |          |          |          |          |          |          |          |          |          |          |          |          |          |
| 208.4525                                                                                                                                                                                                                                                                                                                                                                                                                                                                                                                                                                                                                                                                                                                                                                                                                                                                                                                                                                                                                                                                                           | 235.6481                                                                            | 238.4646                                                                             |          |   |   |   |          |          |          |   |          |          |          |   |          |          |          |   |          |          |         |   |          |          |         |   |          |          |          |   |          |         |         |   |          |         |          |   |          |         |          |   |          |         |          |   |          |         |          |   |          |         |          |   |          |         |         |                                                                                                                                                                                                                                                                                                                                                                                                                                                                                                                                                                                                                                                                                                                                                                                                                                                                                                                                                                                                                                                                                                                        |         |         |         |          |          |          |          |          |          |          |          |          |          |          |          |          |          |          |          |          |          |          |          |          |          |          |          |          |          |          |          |          |          |          |          |          |          |          |          |          |          |          |          |          |          |          |          |          |          |          |          |
| 246.9020                                                                                                                                                                                                                                                                                                                                                                                                                                                                                                                                                                                                                                                                                                                                                                                                                                                                                                                                                                                                                                                                                           | 249.3949                                                                            | 260.5137                                                                             |          |   |   |   |          |          |          |   |          |          |          |   |          |          |          |   |          |          |         |   |          |          |         |   |          |          |          |   |          |         |         |   |          |         |          |   |          |         |          |   |          |         |          |   |          |         |          |   |          |         |          |   |          |         |         |                                                                                                                                                                                                                                                                                                                                                                                                                                                                                                                                                                                                                                                                                                                                                                                                                                                                                                                                                                                                                                                                                                                        |         |         |         |          |          |          |          |          |          |          |          |          |          |          |          |          |          |          |          |          |          |          |          |          |          |          |          |          |          |          |          |          |          |          |          |          |          |          |          |          |          |          |          |          |          |          |          |          |          |          |          |
| 275.2453                                                                                                                                                                                                                                                                                                                                                                                                                                                                                                                                                                                                                                                                                                                                                                                                                                                                                                                                                                                                                                                                                           | 301.8042                                                                            | 318.5522                                                                             |          |   |   |   |          |          |          |   |          |          |          |   |          |          |          |   |          |          |         |   |          |          |         |   |          |          |          |   |          |         |         |   |          |         |          |   |          |         |          |   |          |         |          |   |          |         |          |   |          |         |          |   |          |         |         |                                                                                                                                                                                                                                                                                                                                                                                                                                                                                                                                                                                                                                                                                                                                                                                                                                                                                                                                                                                                                                                                                                                        |         |         |         |          |          |          |          |          |          |          |          |          |          |          |          |          |          |          |          |          |          |          |          |          |          |          |          |          |          |          |          |          |          |          |          |          |          |          |          |          |          |          |          |          |          |          |          |          |          |          |          |
| 335.0754                                                                                                                                                                                                                                                                                                                                                                                                                                                                                                                                                                                                                                                                                                                                                                                                                                                                                                                                                                                                                                                                                           | 342.6053                                                                            | 374.7917                                                                             |          |   |   |   |          |          |          |   |          |          |          |   |          |          |          |   |          |          |         |   |          |          |         |   |          |          |          |   |          |         |         |   |          |         |          |   |          |         |          |   |          |         |          |   |          |         |          |   |          |         |          |   |          |         |         |                                                                                                                                                                                                                                                                                                                                                                                                                                                                                                                                                                                                                                                                                                                                                                                                                                                                                                                                                                                                                                                                                                                        |         |         |         |          |          |          |          |          |          |          |          |          |          |          |          |          |          |          |          |          |          |          |          |          |          |          |          |          |          |          |          |          |          |          |          |          |          |          |          |          |          |          |          |          |          |          |          |          |          |          |          |
| 391.8667                                                                                                                                                                                                                                                                                                                                                                                                                                                                                                                                                                                                                                                                                                                                                                                                                                                                                                                                                                                                                                                                                           | 400.5610                                                                            | 406.4440                                                                             |          |   |   |   |          |          |          |   |          |          |          |   |          |          |          |   |          |          |         |   |          |          |         |   |          |          |          |   |          |         |         |   |          |         |          |   |          |         |          |   |          |         |          |   |          |         |          |   |          |         |          |   |          |         |         |                                                                                                                                                                                                                                                                                                                                                                                                                                                                                                                                                                                                                                                                                                                                                                                                                                                                                                                                                                                                                                                                                                                        |         |         |         |          |          |          |          |          |          |          |          |          |          |          |          |          |          |          |          |          |          |          |          |          |          |          |          |          |          |          |          |          |          |          |          |          |          |          |          |          |          |          |          |          |          |          |          |          |          |          |          |
| 445.2387                                                                                                                                                                                                                                                                                                                                                                                                                                                                                                                                                                                                                                                                                                                                                                                                                                                                                                                                                                                                                                                                                           | 449.2125                                                                            | 454.6019                                                                             |          |   |   |   |          |          |          |   |          |          |          |   |          |          |          |   |          |          |         |   |          |          |         |   |          |          |          |   |          |         |         |   |          |         |          |   |          |         |          |   |          |         |          |   |          |         |          |   |          |         |          |   |          |         |         |                                                                                                                                                                                                                                                                                                                                                                                                                                                                                                                                                                                                                                                                                                                                                                                                                                                                                                                                                                                                                                                                                                                        |         |         |         |          |          |          |          |          |          |          |          |          |          |          |          |          |          |          |          |          |          |          |          |          |          |          |          |          |          |          |          |          |          |          |          |          |          |          |          |          |          |          |          |          |          |          |          |          |          |          |          |
| 471.6689                                                                                                                                                                                                                                                                                                                                                                                                                                                                                                                                                                                                                                                                                                                                                                                                                                                                                                                                                                                                                                                                                           | 479.0623                                                                            | 483.7753                                                                             |          |   |   |   |          |          |          |   |          |          |          |   |          |          |          |   |          |          |         |   |          |          |         |   |          |          |          |   |          |         |         |   |          |         |          |   |          |         |          |   |          |         |          |   |          |         |          |   |          |         |          |   |          |         |         |                                                                                                                                                                                                                                                                                                                                                                                                                                                                                                                                                                                                                                                                                                                                                                                                                                                                                                                                                                                                                                                                                                                        |         |         |         |          |          |          |          |          |          |          |          |          |          |          |          |          |          |          |          |          |          |          |          |          |          |          |          |          |          |          |          |          |          |          |          |          |          |          |          |          |          |          |          |          |          |          |          |          |          |          |          |
| 489.6753                                                                                                                                                                                                                                                                                                                                                                                                                                                                                                                                                                                                                                                                                                                                                                                                                                                                                                                                                                                                                                                                                           | 500.0564                                                                            | 535.8009                                                                             |          |   |   |   |          |          |          |   |          |          |          |   |          |          |          |   |          |          |         |   |          |          |         |   |          |          |          |   |          |         |         |   |          |         |          |   |          |         |          |   |          |         |          |   |          |         |          |   |          |         |          |   |          |         |         |                                                                                                                                                                                                                                                                                                                                                                                                                                                                                                                                                                                                                                                                                                                                                                                                                                                                                                                                                                                                                                                                                                                        |         |         |         |          |          |          |          |          |          |          |          |          |          |          |          |          |          |          |          |          |          |          |          |          |          |          |          |          |          |          |          |          |          |          |          |          |          |          |          |          |          |          |          |          |          |          |          |          |          |          |          |
| 551.6620                                                                                                                                                                                                                                                                                                                                                                                                                                                                                                                                                                                                                                                                                                                                                                                                                                                                                                                                                                                                                                                                                           | 558.9286                                                                            | 583.0300                                                                             |          |   |   |   |          |          |          |   |          |          |          |   |          |          |          |   |          |          |         |   |          |          |         |   |          |          |          |   |          |         |         |   |          |         |          |   |          |         |          |   |          |         |          |   |          |         |          |   |          |         |          |   |          |         |         |                                                                                                                                                                                                                                                                                                                                                                                                                                                                                                                                                                                                                                                                                                                                                                                                                                                                                                                                                                                                                                                                                                                        |         |         |         |          |          |          |          |          |          |          |          |          |          |          |          |          |          |          |          |          |          |          |          |          |          |          |          |          |          |          |          |          |          |          |          |          |          |          |          |          |          |          |          |          |          |          |          |          |          |          |          |
| 583.9880                                                                                                                                                                                                                                                                                                                                                                                                                                                                                                                                                                                                                                                                                                                                                                                                                                                                                                                                                                                                                                                                                           | 592.4817                                                                            | 600.2536                                                                             |          |   |   |   |          |          |          |   |          |          |          |   |          |          |          |   |          |          |         |   |          |          |         |   |          |          |          |   |          |         |         |   |          |         |          |   |          |         |          |   |          |         |          |   |          |         |          |   |          |         |          |   |          |         |         |                                                                                                                                                                                                                                                                                                                                                                                                                                                                                                                                                                                                                                                                                                                                                                                                                                                                                                                                                                                                                                                                                                                        |         |         |         |          |          |          |          |          |          |          |          |          |          |          |          |          |          |          |          |          |          |          |          |          |          |          |          |          |          |          |          |          |          |          |          |          |          |          |          |          |          |          |          |          |          |          |          |          |          |          |          |
| 617.4134                                                                                                                                                                                                                                                                                                                                                                                                                                                                                                                                                                                                                                                                                                                                                                                                                                                                                                                                                                                                                                                                                           | 655.5121                                                                            | 664.7998                                                                             |          |   |   |   |          |          |          |   |          |          |          |   |          |          |          |   |          |          |         |   |          |          |         |   |          |          |          |   |          |         |         |   |          |         |          |   |          |         |          |   |          |         |          |   |          |         |          |   |          |         |          |   |          |         |         |                                                                                                                                                                                                                                                                                                                                                                                                                                                                                                                                                                                                                                                                                                                                                                                                                                                                                                                                                                                                                                                                                                                        |         |         |         |          |          |          |          |          |          |          |          |          |          |          |          |          |          |          |          |          |          |          |          |          |          |          |          |          |          |          |          |          |          |          |          |          |          |          |          |          |          |          |          |          |          |          |          |          |          |          |          |
| 685.1051                                                                                                                                                                                                                                                                                                                                                                                                                                                                                                                                                                                                                                                                                                                                                                                                                                                                                                                                                                                                                                                                                           | 699.3269                                                                            | 708.4269                                                                             |          |   |   |   |          |          |          |   |          |          |          |   |          |          |          |   |          |          |         |   |          |          |         |   |          |          |          |   |          |         |         |   |          |         |          |   |          |         |          |   |          |         |          |   |          |         |          |   |          |         |          |   |          |         |         |                                                                                                                                                                                                                                                                                                                                                                                                                                                                                                                                                                                                                                                                                                                                                                                                                                                                                                                                                                                                                                                                                                                        |         |         |         |          |          |          |          |          |          |          |          |          |          |          |          |          |          |          |          |          |          |          |          |          |          |          |          |          |          |          |          |          |          |          |          |          |          |          |          |          |          |          |          |          |          |          |          |          |          |          |          |
| 710.5393                                                                                                                                                                                                                                                                                                                                                                                                                                                                                                                                                                                                                                                                                                                                                                                                                                                                                                                                                                                                                                                                                           | 717.7293                                                                            | 724.2741                                                                             |          |   |   |   |          |          |          |   |          |          |          |   |          |          |          |   |          |          |         |   |          |          |         |   |          |          |          |   |          |         |         |   |          |         |          |   |          |         |          |   |          |         |          |   |          |         |          |   |          |         |          |   |          |         |         |                                                                                                                                                                                                                                                                                                                                                                                                                                                                                                                                                                                                                                                                                                                                                                                                                                                                                                                                                                                                                                                                                                                        |         |         |         |          |          |          |          |          |          |          |          |          |          |          |          |          |          |          |          |          |          |          |          |          |          |          |          |          |          |          |          |          |          |          |          |          |          |          |          |          |          |          |          |          |          |          |          |          |          |          |          |
| 741.9330                                                                                                                                                                                                                                                                                                                                                                                                                                                                                                                                                                                                                                                                                                                                                                                                                                                                                                                                                                                                                                                                                           | 756.3664                                                                            | 765.4903                                                                             |          |   |   |   |          |          |          |   |          |          |          |   |          |          |          |   |          |          |         |   |          |          |         |   |          |          |          |   |          |         |         |   |          |         |          |   |          |         |          |   |          |         |          |   |          |         |          |   |          |         |          |   |          |         |         |                                                                                                                                                                                                                                                                                                                                                                                                                                                                                                                                                                                                                                                                                                                                                                                                                                                                                                                                                                                                                                                                                                                        |         |         |         |          |          |          |          |          |          |          |          |          |          |          |          |          |          |          |          |          |          |          |          |          |          |          |          |          |          |          |          |          |          |          |          |          |          |          |          |          |          |          |          |          |          |          |          |          |          |          |          |
| 771.8345                                                                                                                                                                                                                                                                                                                                                                                                                                                                                                                                                                                                                                                                                                                                                                                                                                                                                                                                                                                                                                                                                           | 783.3393                                                                            | 810.1790                                                                             |          |   |   |   |          |          |          |   |          |          |          |   |          |          |          |   |          |          |         |   |          |          |         |   |          |          |          |   |          |         |         |   |          |         |          |   |          |         |          |   |          |         |          |   |          |         |          |   |          |         |          |   |          |         |         |                                                                                                                                                                                                                                                                                                                                                                                                                                                                                                                                                                                                                                                                                                                                                                                                                                                                                                                                                                                                                                                                                                                        |         |         |         |          |          |          |          |          |          |          |          |          |          |          |          |          |          |          |          |          |          |          |          |          |          |          |          |          |          |          |          |          |          |          |          |          |          |          |          |          |          |          |          |          |          |          |          |          |          |          |          |

|    |          |          |          |           |           |           |
|----|----------|----------|----------|-----------|-----------|-----------|
| H  | -5.94928 | -1.18576 | -0.45009 | 823.8249  | 831.0816  | 839.3393  |
| H  | -2.44271 | -4.52063 | -0.21132 | 845.6314  | 848.6022  | 862.6935  |
| H  | -4.62903 | -3.41684 | -0.21310 | 864.0477  | 876.5505  | 879.8093  |
| H  | -5.92035 | 1.28442  | -0.46457 | 884.3302  | 914.0536  | 918.1334  |
| H  | -2.32333 | 4.52945  | -0.12041 | 926.6151  | 953.1062  | 986.1771  |
| N  | -1.42115 | -1.32580 | 0.48729  | 988.6093  | 1000.7480 | 1011.6319 |
| N  | -1.36214 | 1.31242  | 0.12679  | 1016.5833 | 1023.6270 | 1026.1495 |
| Co | 0.01679  | 0.03428  | 0.23511  | 1026.9085 | 1032.6729 | 1108.5792 |
| C  | 2.62000  | -0.72395 | -0.00624 | 1121.8028 | 1144.7370 | 1156.7634 |
| C  | 1.27032  | -2.63453 | -0.02095 | 1174.3392 | 1178.6941 | 1180.8917 |
| C  | 2.62225  | 0.70242  | -0.00950 | 1189.8560 | 1220.0782 | 1231.4138 |
| C  | 3.81972  | -1.44756 | -0.11029 | 1244.0492 | 1246.7917 | 1260.2380 |
| C  | 2.43874  | -3.43571 | -0.12938 | 1261.8212 | 1269.2849 | 1271.9589 |
| C  | 3.82628  | 1.39527  | -0.09170 | 1298.0884 | 1324.4185 | 1344.8002 |
| C  | 5.04592  | -0.71999 | -0.18079 | 1369.6127 | 1381.4063 | 1403.2579 |
| C  | 3.68573  | -2.85612 | -0.15703 | 1417.9569 | 1420.2785 | 1443.3501 |
| H  | 2.32963  | -4.51250 | -0.19077 | 1449.5876 | 1457.5633 | 1461.3041 |
| C  | 3.72116  | 2.82537  | -0.09574 | 1479.3420 | 1480.4654 | 1488.8436 |
| C  | 5.04215  | 0.64935  | -0.16783 | 1513.8433 | 1534.2196 | 1546.8072 |
| C  | 1.27913  | 2.64979  | 0.02889  | 1572.1227 | 1582.1696 | 1630.3410 |
| H  | 5.97926  | -1.26824 | -0.25207 | 1643.3274 | 1653.1732 | 1680.9419 |
| H  | 4.57397  | -3.47685 | -0.23081 | 1692.1175 | 1698.6150 | 1709.4171 |
| C  | 2.50038  | 3.42118  | -0.03734 | 1718.7862 | 1733.9352 | 2133.9869 |
| H  | 4.62414  | 3.42615  | -0.14688 | 3211.1675 | 3211.7269 | 3211.7846 |
| H  | 5.97941  | 1.19435  | -0.22462 | 3214.6858 | 3217.7410 | 3224.5460 |
| H  | 2.41296  | 4.50196  | -0.04125 | 3224.7111 | 3226.0426 | 3230.1973 |
| N  | 1.39837  | -1.30919 | 0.06494  | 3234.8347 | 3236.7915 | 3239.2728 |
| N  | 1.39857  | 1.30012  | 0.04294  | 3240.8027 | 3244.7530 | 3379.6427 |
| H  | 0.19989  | 0.13900  | 1.59991  |           |           |           |
| C  | -0.04820 | -3.26690 | -0.06233 |           |           |           |
| H  | -0.03262 | -4.33522 | -0.25561 |           |           |           |
| C  | 0.02703  | 3.28554  | 0.04759  |           |           |           |
| H  | 0.03107  | 4.36759  | 0.00562  |           |           |           |
| H  | -1.39197 | -1.36276 | 1.51537  |           |           |           |

### Statistical Thermodynamic Analysis

Temperature = 353.15 K

Pressure = 1 atm

Zero-point correction= 0.362846

Electronic Energy = -1363.86036414

Internal Energy (E)= -1363.46913114

Enthalpy (H)= -1363.46801314

Gibbs Free Energy (G)=-1363.55647714

Gibbs Free Energy of Solvation=-1363.61478036

| St. Pt.    | General Structure                                                                   | Ball & Stick model                                                                   |
|------------|-------------------------------------------------------------------------------------|--------------------------------------------------------------------------------------|
| Azobenzene | 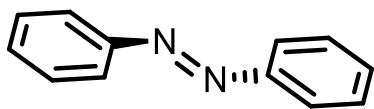 |  |



### Statistical Thermodynamic Analysis

Temperature = 353.15 K

Pressure = 1 atm

Zero-point correction = 0.192808

Electronic Energy = -572.525521298

Internal Energy (E) = -572.317828298

Enthalpy (H) = -572.316710298

Gibbs Free Energy (G) = -572.381131298

Gibbs Free Energy of Solvation = -572.386355339

| St. Pt.                         | General Structure                                                                 | Ball & Stick model                                                                  |          |           |          |          |
|---------------------------------|-----------------------------------------------------------------------------------|-------------------------------------------------------------------------------------|----------|-----------|----------|----------|
| <b>TS1</b> <sup>Hyd1(MLC)</sup> | 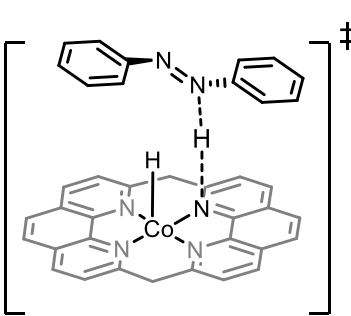 |  |          |           |          |          |
|                                 | <b>Cartesian co-ordinate</b>                                                      | <b>Frequencies</b>                                                                  |          |           |          |          |
|                                 | -----                                                                             |                                                                                     |          |           |          |          |
| <b>Atoms</b>                    | <b>X</b>                                                                          | <b>Y</b>                                                                            | <b>Z</b> |           |          |          |
|                                 | -----                                                                             |                                                                                     |          |           |          |          |
| N                               | -0.37540                                                                          | -0.49712                                                                            | -0.00066 | -666.0071 | 11.3531  | 16.5783  |
| N                               | 0.37532                                                                           | 0.49678                                                                             | 0.00042  | 25.8128   | 38.7576  | 44.1879  |
| C                               | 1.76540                                                                           | 0.18428                                                                             | 0.00020  | 51.4598   | 57.1238  | 63.4135  |
| C                               | 2.28268                                                                           | -1.11567                                                                            | 0.00052  | 71.7880   | 77.3432  | 103.2822 |
| C                               | 2.62286                                                                           | 1.28323                                                                             | -0.00014 | 120.8424  | 134.9565 | 157.7035 |
| C                               | 3.65764                                                                           | -1.29991                                                                            | 0.00039  | 165.0465  | 200.2714 | 211.4236 |
| H                               | 1.59580                                                                           | -1.95391                                                                            | 0.00087  | 215.3743  | 240.5628 | 246.9180 |
| C                               | 4.00071                                                                           | 1.09144                                                                             | -0.00036 | 253.2002  | 255.0447 | 270.9319 |
| H                               | 2.18529                                                                           | 2.27626                                                                             | -0.00029 | 280.1272  | 286.5473 | 303.9710 |
| C                               | 4.51876                                                                           | -0.20015                                                                            | -0.00010 | 320.8081  | 337.3559 | 347.7053 |
| H                               | 4.06571                                                                           | -2.30567                                                                            | 0.00068  | 371.9716  | 380.9165 | 399.1432 |
| H                               | 4.66732                                                                           | 1.94739                                                                             | -0.00073 | 403.4036  | 408.7577 | 412.8884 |
| H                               | 5.59301                                                                           | -0.35476                                                                            | -0.00022 | 419.4791  | 447.4673 | 450.5032 |
| C                               | -1.76545                                                                          | -0.18454                                                                            | -0.00036 | 457.3156  | 468.0117 | 472.1510 |
| C                               | -2.28245                                                                          | 1.11551                                                                             | -0.00005 | 479.2158  | 485.1075 | 489.6548 |
| C                               | -2.62311                                                                          | -1.28332                                                                            | -0.00051 | 491.2162  | 510.4744 | 530.2146 |
| C                               | -3.65737                                                                          | 1.30009                                                                             | 0.00033  | 499.2162  | 510.4744 | 530.2146 |
| H                               | -1.59539                                                                          | 1.95358                                                                             | -0.00014 | 537.1852  | 555.2847 | 573.3440 |
| C                               | -4.00089                                                                          | -1.09118                                                                            | -0.00009 | 582.1232  | 585.1553 | 593.2898 |
| H                               | -2.18588                                                                          | -2.27650                                                                            | -0.00086 | 597.9193  | 611.1140 | 614.6087 |
| C                               | -4.51869                                                                          | 0.20052                                                                             | 0.00038  | 623.8860  | 625.6914 | 635.7988 |
| H                               | -4.06519                                                                          | 2.30595                                                                             | 0.00055  | 671.4223  | 678.2471 | 684.6263 |
|                                 |                                                                                   |                                                                                     |          | 692.3949  | 705.0578 | 708.3166 |
|                                 |                                                                                   |                                                                                     |          | 711.3228  | 717.2734 | 721.0587 |
|                                 |                                                                                   |                                                                                     |          | 735.6271  | 741.2756 | 745.8826 |
|                                 |                                                                                   |                                                                                     |          | 754.9070  | 763.4629 | 771.7775 |
|                                 |                                                                                   |                                                                                     |          | 781.5155  | 787.0236 | 793.4566 |

|   |          |          |          |           |           |           |
|---|----------|----------|----------|-----------|-----------|-----------|
| H | -4.66771 | -1.94697 | -0.00020 | 797.8030  | 814.5556  | 820.3684  |
| H | -5.59292 | 0.35526  | 0.00068  | 825.3549  | 833.3865  | 847.3669  |
| C | 3.81972  | -1.44756 | -0.11029 | 853.3899  | 860.9032  | 866.0132  |
| C | 2.43874  | -3.43571 | -0.12938 | 870.1845  | 875.6904  | 878.7197  |
| C | 3.82628  | 1.39527  | -0.09170 | 883.8619  | 895.5861  | 897.6619  |
| C | 5.04592  | -0.71999 | -0.18079 | 916.9032  | 930.2455  | 941.2365  |
| C | 3.68573  | -2.85612 | -0.15703 | 953.1656  | 967.1883  | 979.8411  |
| H | 2.32963  | -4.51250 | -0.19077 | 987.4143  | 999.0664  | 1004.8574 |
| C | 3.72116  | 2.82537  | -0.09574 | 1006.9249 | 1012.0558 | 1014.5572 |
| C | 5.04215  | 0.64935  | -0.16783 | 1021.1176 | 1023.4092 | 1023.5028 |
| C | 1.27913  | 2.64979  | 0.02889  | 1026.3843 | 1027.4390 | 1032.6685 |
| H | 5.97926  | -1.26824 | -0.25207 | 1036.7221 | 1039.1649 | 1066.2380 |
| H | 4.57397  | -3.47685 | -0.23081 | 1067.7968 | 1112.9133 | 1121.2118 |
| C | 2.50038  | 3.42118  | -0.03734 | 1125.2598 | 1128.3309 | 1143.7793 |
| H | 4.62414  | 3.42615  | -0.14688 | 1155.8502 | 1170.4489 | 1172.9921 |
| H | 5.97941  | 1.19435  | -0.22462 | 1182.5440 | 1186.0604 | 1187.2863 |
| H | 2.41296  | 4.50196  | -0.04125 | 1189.0823 | 1195.7465 | 1200.9769 |
| N | 1.39837  | -1.30919 | 0.06494  | 1222.8464 | 1224.9099 | 1241.8114 |
| N | 1.39857  | 1.30012  | 0.04294  | 1243.4681 | 1245.5800 | 1246.6438 |
| H | 0.19989  | 0.13900  | 1.59991  | 1254.6014 | 1262.0045 | 1270.7467 |
| C | -0.04820 | -3.26690 | -0.06233 | 1278.8861 | 1298.0032 | 1320.9324 |
| H | -0.03262 | -4.33522 | -0.25561 | 1327.5633 | 1346.0564 | 1348.7964 |
| C | 0.02703  | 3.28554  | 0.04759  | 1358.8760 | 1364.1475 | 1375.0200 |
| H | 0.03107  | 4.36759  | 0.00562  | 1392.7002 | 1411.3939 | 1418.9673 |
| H | -1.39197 | -1.36276 | 1.51537  | 1431.2596 | 1443.0647 | 1449.2288 |
|   |          |          |          | 1460.4004 | 1463.8270 | 1479.4997 |
|   |          |          |          | 1481.7964 | 1484.9287 | 1507.1731 |
|   |          |          |          | 1510.0872 | 1512.0648 | 1532.4158 |
|   |          |          |          | 1537.5891 | 1538.5353 | 1541.4203 |
|   |          |          |          | 1572.5367 | 1576.6299 | 1616.0086 |
|   |          |          |          | 1633.0218 | 1637.9732 | 1651.2968 |
|   |          |          |          | 1671.1866 | 1673.0820 | 1675.3809 |
|   |          |          |          | 1684.8254 | 1687.7462 | 1689.6903 |
|   |          |          |          | 1700.9326 | 1705.0745 | 1715.0415 |
|   |          |          |          | 1724.5179 | 1728.9111 | 2170.0152 |
|   |          |          |          | 3205.2048 | 3206.2694 | 3211.9348 |
|   |          |          |          | 3212.5704 | 3214.7400 | 3214.8060 |
|   |          |          |          | 3216.2194 | 3220.4373 | 3222.7207 |
|   |          |          |          | 3223.4204 | 3223.7653 | 3225.2508 |
|   |          |          |          | 3226.2580 | 3226.4739 | 3228.7955 |
|   |          |          |          | 3231.8367 | 3237.2024 | 3237.7969 |
|   |          |          |          | 3238.4670 | 3239.1115 | 3240.9208 |
|   |          |          |          | 3245.4038 | 3251.5416 | 3262.1338 |

### Statistical Thermodynamic Analysis

Temperature = 353.15 K

Pressure = 1 atm

Zero-point correction = 0.551917

Electronic Energy = -1936.39019315

Internal Energy (E) = -1935.79316715

Enthalpy (H) = -1935.79204815

Gibbs Free Energy (G) = -1935.92150215

Gibbs Free Energy of Solvation = -1935.97318967



| St. Pt.                 | General Structure                                                                 | Ball & Stick model                                                                 |          |           |           |           |
|-------------------------|-----------------------------------------------------------------------------------|------------------------------------------------------------------------------------|----------|-----------|-----------|-----------|
| 12 <sup>Hyd1(MLC)</sup> | 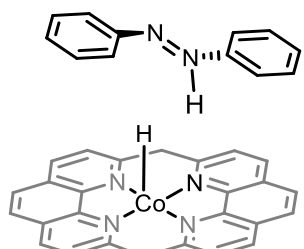 |  |          |           |           |           |
| Cartesian coordinate    |                                                                                   | Frequencies                                                                        |          |           |           |           |
| -----                   |                                                                                   |                                                                                    |          |           |           |           |
| Atoms                   | X                                                                                 | Y                                                                                  | Z        | 18.1218   | 28.9544   | 33.2073   |
| -----                   |                                                                                   |                                                                                    |          | 41.5992   | 49.4314   | 58.8651   |
|                         |                                                                                   |                                                                                    |          | 63.6069   | 71.9940   | 78.8198   |
|                         |                                                                                   |                                                                                    |          | 95.7954   | 102.2133  | 118.9448  |
| N                       | -0.37540                                                                          | -0.49712                                                                           | -0.00066 | 139.8833  | 163.1413  | 171.2855  |
| N                       | 0.37532                                                                           | 0.49678                                                                            | 0.00042  | 186.1619  | 212.4416  | 220.5648  |
| C                       | 1.76540                                                                           | 0.18428                                                                            | 0.00020  | 241.3052  | 250.7175  | 259.2827  |
| C                       | 2.28268                                                                           | -1.11567                                                                           | 0.00052  | 260.6071  | 266.5373  | 278.5986  |
| C                       | 2.62286                                                                           | 1.28323                                                                            | -0.00014 | 281.8122  | 296.1818  | 307.1399  |
| C                       | 3.65764                                                                           | -1.29991                                                                           | 0.00039  | 337.9287  | 339.1830  | 350.2399  |
| H                       | 1.59580                                                                           | -1.95391                                                                           | 0.00087  | 384.1976  | 405.9325  | 406.2034  |
| C                       | 4.00071                                                                           | 1.09144                                                                            | -0.00036 | 406.4416  | 410.4934  | 415.0320  |
| H                       | 2.18529                                                                           | 2.27626                                                                            | -0.00029 | 417.8131  | 447.7329  | 460.6103  |
| C                       | 4.51876                                                                           | -0.20015                                                                           | -0.00010 | 462.2507  | 468.6182  | 476.8901  |
| H                       | 4.06571                                                                           | -2.30567                                                                           | 0.00068  | 485.2696  | 487.9026  | 492.7527  |
| H                       | 4.66732                                                                           | 1.94739                                                                            | -0.00073 | 494.5756  | 512.3833  | 535.7415  |
| H                       | 5.59301                                                                           | -0.35476                                                                           | -0.00022 | 538.1853  | 557.7894  | 584.0756  |
| C                       | -1.76545                                                                          | -0.18454                                                                           | -0.00036 | 585.2408  | 588.6728  | 594.3103  |
| C                       | -2.28245                                                                          | 1.11551                                                                            | -0.00005 | 596.0402  | 598.9333  | 618.3504  |
| C                       | -2.62311                                                                          | -1.28332                                                                           | -0.00051 | 623.2085  | 628.3542  | 678.2769  |
| C                       | -3.65737                                                                          | 1.30009                                                                            | 0.00033  | 684.5920  | 686.3039  | 687.8981  |
| H                       | -1.59539                                                                          | 1.95358                                                                            | -0.00014 | 695.3028  | 703.2232  | 712.0498  |
| C                       | -4.00089                                                                          | -1.09118                                                                           | -0.00009 | 714.9204  | 722.7840  | 733.9654  |
| H                       | -2.18588                                                                          | -2.27650                                                                           | -0.00086 | 741.2468  | 747.2384  | 755.5883  |
| C                       | -4.51869                                                                          | 0.20052                                                                            | 0.00038  | 764.2851  | 767.1409  | 774.3392  |
| H                       | -4.06519                                                                          | 2.30595                                                                            | 0.00055  | 776.7977  | 782.8614  | 788.3418  |
| H                       | -4.66771                                                                          | -1.94697                                                                           | -0.00020 | 804.7201  | 812.0346  | 816.9275  |
| H                       | -5.59292                                                                          | 0.35526                                                                            | 0.00068  | 831.4487  | 833.6672  | 852.9384  |
| C                       | 3.81972                                                                           | -1.44756                                                                           | -0.11029 | 856.7003  | 861.4982  | 861.6657  |
| C                       | 2.43874                                                                           | -3.43571                                                                           | -0.12938 | 868.2890  | 869.3525  | 873.5118  |
| C                       | 3.82628                                                                           | 1.39527                                                                            | -0.09170 | 876.4565  | 884.4244  | 906.1346  |
| C                       | 5.04592                                                                           | -0.71999                                                                           | -0.18079 | 907.9581  | 919.2704  | 943.0535  |
| C                       | 3.68573                                                                           | -2.85612                                                                           | -0.15703 | 952.4696  | 968.5873  | 971.8417  |
| H                       | 2.32963                                                                           | -4.51250                                                                           | -0.19077 | 978.1618  | 988.1263  | 1008.0757 |
| C                       | 3.72116                                                                           | 2.82537                                                                            | -0.09574 | 1010.3465 | 1012.1966 | 1013.1282 |
| C                       | 5.04215                                                                           | 0.64935                                                                            | -0.16783 | 1014.7150 | 1015.0118 | 1017.3568 |
| C                       | 1.27913                                                                           | 2.64979                                                                            | 0.02889  | 1023.2051 | 1024.7739 | 1035.6810 |

|   |          |          |          |           |           |           |
|---|----------|----------|----------|-----------|-----------|-----------|
| H | 5.97926  | -1.26824 | -0.25207 | 1042.3437 | 1044.5141 | 1064.9163 |
| H | 4.57397  | -3.47685 | -0.23081 | 1066.8899 | 1117.7275 | 1128.7765 |
| C | 2.50038  | 3.42118  | -0.03734 | 1131.2335 | 1137.1833 | 1143.0043 |
| H | 4.62414  | 3.42615  | -0.14688 | 1159.3249 | 1167.4967 | 1173.9437 |
| H | 5.97941  | 1.19435  | -0.22462 | 1182.6884 | 1186.1213 | 1187.8571 |
| H | 2.41296  | 4.50196  | -0.04125 | 1191.2703 | 1192.8806 | 1206.4220 |
| N | 1.39837  | -1.30919 | 0.06494  | 1224.9543 | 1231.3683 | 1238.3270 |
| N | 1.39857  | 1.30012  | 0.04294  | 1243.4036 | 1246.9290 | 1253.7309 |
| H | 0.19989  | 0.13900  | 1.59991  | 1257.6313 | 1258.7708 | 1275.8257 |
| C | -0.04820 | -3.26690 | -0.06233 | 1300.6323 | 1303.4922 | 1331.5460 |
| H | -0.03262 | -4.33522 | -0.25561 | 1348.4311 | 1356.0230 | 1369.6792 |
| C | 0.02703  | 3.28554  | 0.04759  | 1383.1198 | 1386.9782 | 1397.5228 |
| H | 0.03107  | 4.36759  | 0.00562  | 1417.0657 | 1422.4673 | 1433.0898 |
| H | -1.39197 | -1.36276 | 1.51537  | 1451.8443 | 1456.5310 | 1461.9981 |
|   |          |          |          | 1470.3951 | 1474.9578 | 1479.3693 |
|   |          |          |          | 1480.4016 | 1487.1887 | 1504.3788 |
|   |          |          |          | 1511.2046 | 1516.4257 | 1526.7160 |
|   |          |          |          | 1529.6192 | 1542.8817 | 1552.1389 |
|   |          |          |          | 1566.7350 | 1568.4404 | 1577.1638 |
|   |          |          |          | 1604.5136 | 1616.3316 | 1639.2671 |
|   |          |          |          | 1654.4278 | 1659.7471 | 1677.0964 |
|   |          |          |          | 1681.9251 | 1686.3884 | 1695.8148 |
|   |          |          |          | 1698.0281 | 1702.8593 | 1708.5271 |
|   |          |          |          | 1717.1012 | 2068.2866 | 3201.0912 |
|   |          |          |          | 3203.5940 | 3203.7980 | 3207.0150 |
|   |          |          |          | 3207.5889 | 3208.1541 | 3209.7395 |
|   |          |          |          | 3216.5364 | 3219.4073 | 3225.8707 |
|   |          |          |          | 3227.3334 | 3227.3883 | 3229.4847 |
|   |          |          |          | 3230.7098 | 3231.1917 | 3231.3318 |
|   |          |          |          | 3232.0987 | 3236.1719 | 3242.1989 |
|   |          |          |          | 3247.1960 | 3248.6964 | 3251.4232 |
|   |          |          |          | 3255.7470 | 3258.5132 | 3394.4564 |

### Statistical Thermodynamic Analysis

Temperature = 353.15 K

Pressure = 1 atm

Zero-point correction = 0.557150

Electronic Energy = -1936.41057117

Internal Energy (E) = -1935.80815017

Enthalpy (H) = -1935.80703217

Gibbs Free Energy (G) = -1935.93456917

Gibbs Free Energy of Solvation = -1935.99093972

| St. Point                      | General Structure                                                                   | Ball & Stick model                                                                   |
|--------------------------------|-------------------------------------------------------------------------------------|--------------------------------------------------------------------------------------|
| <b>13</b> <sup>Hyd1(MLC)</sup> | 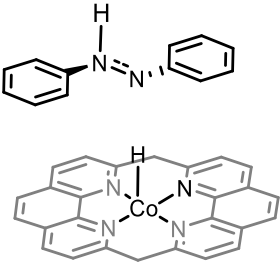 |  |

| Cartesian coordinate |          |          |          | Frequencies |           |           |
|----------------------|----------|----------|----------|-------------|-----------|-----------|
| Atoms                | X        | Y        | Z        |             |           |           |
|                      |          |          |          | 31.1607     | 33.1570   | 40.0874   |
|                      |          |          |          | 43.2839     | 52.6526   | 60.5361   |
|                      |          |          |          | 73.3689     | 79.8647   | 95.1561   |
|                      |          |          |          | 108.0867    | 113.9586  | 138.0017  |
|                      |          |          |          | 139.6030    | 159.8553  | 167.9283  |
| N                    | -0.37540 | -0.49712 | -0.00066 | 185.9321    | 212.4604  | 231.3946  |
| N                    | 0.37532  | 0.49678  | 0.00042  | 241.9960    | 250.4744  | 257.0463  |
| C                    | 1.76540  | 0.18428  | 0.00020  | 258.9070    | 266.1700  | 272.1911  |
| C                    | 2.28268  | -1.11567 | 0.00052  | 284.0949    | 297.1456  | 308.1735  |
| C                    | 2.62286  | 1.28323  | -0.00014 | 338.7804    | 339.1362  | 353.4966  |
| C                    | 3.65764  | -1.29991 | 0.00039  | 384.5352    | 399.1381  | 406.1455  |
| H                    | 1.59580  | -1.95391 | 0.00087  | 409.6372    | 409.9060  | 420.0620  |
| C                    | 4.00071  | 1.09144  | -0.00036 | 426.1417    | 448.6867  | 457.2970  |
| H                    | 2.18529  | 2.27626  | -0.00029 | 462.7641    | 474.1949  | 481.2938  |
| C                    | 4.51876  | -0.20015 | -0.00010 | 487.3703    | 489.1667  | 492.5477  |
| H                    | 4.06571  | -2.30567 | 0.00068  | 495.8253    | 512.8656  | 535.5256  |
| H                    | 4.66732  | 1.94739  | -0.00073 | 538.9590    | 559.4769  | 570.1513  |
| H                    | 5.59301  | -0.35476 | -0.00022 | 583.8830    | 585.9661  | 595.3548  |
| C                    | -1.76545 | -0.18454 | -0.00036 | 596.3689    | 599.2854  | 617.1871  |
| C                    | -2.28245 | 1.11551  | -0.00005 | 624.4320    | 626.7629  | 671.3362  |
| C                    | -2.62311 | -1.28332 | -0.00051 | 680.5604    | 686.9032  | 687.8423  |
| C                    | -3.65737 | 1.30009  | 0.00033  | 689.2854    | 706.1534  | 712.9492  |
| H                    | -1.59539 | 1.95358  | -0.00014 | 715.4191    | 719.7090  | 728.1459  |
| C                    | -4.00089 | -1.09118 | -0.00009 | 740.9852    | 744.0567  | 748.9364  |
| H                    | -2.18588 | -2.27650 | -0.00086 | 750.2021    | 757.5746  | 769.2241  |
| C                    | -4.51869 | 0.20052  | 0.00038  | 773.9988    | 775.6215  | 778.2912  |
| H                    | -4.06519 | 2.30595  | 0.00055  | 801.6542    | 806.4143  | 814.0750  |
| H                    | -4.66771 | -1.94697 | -0.00020 | 817.0683    | 829.5457  | 834.5474  |
| H                    | -5.59292 | 0.35526  | 0.00068  | 843.3203    | 856.0795  | 861.1539  |
| C                    | 3.81972  | -1.44756 | -0.11029 | 869.7344    | 870.8215  | 875.8187  |
| C                    | 2.43874  | -3.43571 | -0.12938 | 876.1593    | 884.4316  | 902.7695  |
| C                    | 3.82628  | 1.39527  | -0.09170 | 908.1815    | 921.8111  | 945.1172  |
| C                    | 5.04592  | -0.71999 | -0.18079 | 953.0755    | 958.8450  | 969.7011  |
| C                    | 3.68573  | -2.85612 | -0.15703 | 976.2452    | 985.8374  | 999.7415  |
| H                    | 2.32963  | -4.51250 | -0.19077 | 1009.1456   | 1011.3700 | 1014.2246 |
| C                    | 3.72116  | 2.82537  | -0.09574 | 1015.1200   | 1017.5885 | 1018.2014 |
| C                    | 5.04215  | 0.64935  | -0.16783 | 1019.3145   | 1022.1480 | 1027.8204 |
| C                    | 1.27913  | 2.64979  | 0.02889  | 1038.9577   | 1042.0311 | 1061.5360 |
| H                    | 5.97926  | -1.26824 | -0.25207 | 1070.3961   | 1119.9662 | 1131.7728 |
| H                    | 4.57397  | -3.47685 | -0.23081 | 1133.8296   | 1140.0615 | 1145.4788 |
| C                    | 2.50038  | 3.42118  | -0.03734 | 1159.8676   | 1171.7609 | 1174.6443 |
| H                    | 4.62414  | 3.42615  | -0.14688 | 1180.5735   | 1185.3015 | 1187.1790 |
| H                    | 5.97941  | 1.19435  | -0.22462 | 1193.8370   | 1196.0198 | 1205.2003 |
| H                    | 2.41296  | 4.50196  | -0.04125 | 1226.6114   | 1237.1806 | 1243.1275 |
| N                    | 1.39837  | -1.30919 | 0.06494  | 1245.4551   | 1246.6225 | 1258.8665 |
| N                    | 1.39857  | 1.30012  | 0.04294  | 1260.6130   | 1263.4892 | 1272.4608 |
| H                    | 0.19989  | 0.13900  | 1.59991  | 1298.3671   | 1302.5618 | 1328.7542 |
| C                    | -0.04820 | -3.26690 | -0.06233 | 1345.8633   | 1356.1148 | 1372.7430 |
| H                    | -0.03262 | -4.33522 | -0.25561 | 1382.0876   | 1389.6580 | 1399.0198 |
| C                    | 0.02703  | 3.28554  | 0.04759  | 1415.2387   | 1421.3938 | 1433.0715 |
| H                    | 0.03107  | 4.36759  | 0.00562  | 1452.2334   | 1458.3351 | 1465.7970 |
| H                    | -1.39197 | -1.36276 | 1.51537  | 1471.9279   | 1477.7674 | 1479.8581 |
|                      |          |          |          | 1483.7182   | 1490.9524 | 1497.7839 |

|           |           |           |
|-----------|-----------|-----------|
| 1507.0269 | 1514.2266 | 1519.0414 |
| 1527.1326 | 1537.0935 | 1545.4659 |
| 1565.9493 | 1567.1655 | 1574.3473 |
| 1588.9606 | 1621.4036 | 1634.0814 |
| 1639.5508 | 1657.9102 | 1675.2242 |
| 1682.1485 | 1685.8752 | 1694.0688 |
| 1695.9200 | 1702.7448 | 1705.2181 |
| 1719.5471 | 2249.0576 | 3199.6997 |
| 3200.3206 | 3208.6026 | 3209.1524 |
| 3212.2947 | 3215.8716 | 3218.4257 |
| 3218.5747 | 3218.8240 | 3221.8139 |
| 3225.0746 | 3227.2771 | 3227.7197 |
| 3228.6611 | 3230.8406 | 3234.1111 |
| 3234.9477 | 3235.3838 | 3239.1855 |
| 3241.0881 | 3247.6173 | 3250.7019 |
| 3257.6046 | 3259.7405 | 3518.1342 |

### Statistical Thermodynamic Analysis

Temperature = 353.15 K

Pressure = 1 atm

Zero-point correction = 0.557664

Electronic Energy = -1936.40851433

Internal Energy (E) = -1935.80573933

Enthalpy (H) = -1935.80462033

Gibbs Free Energy (G) = -1935.93014833

Gibbs Free Energy of Solvation = -1935.98701898

| St. Pt.                   | General Structure                                                                   | Ball & Stick model                                                                   |          |           |          |          |
|---------------------------|-------------------------------------------------------------------------------------|--------------------------------------------------------------------------------------|----------|-----------|----------|----------|
| TS2 <sup>Hyd1</sup> (MLC) | 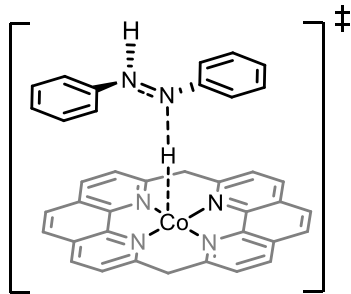 |  |          |           |          |          |
| Cartesian co-ordinate     |                                                                                     | Frequencies                                                                          |          |           |          |          |
| -----                     |                                                                                     |                                                                                      |          |           |          |          |
| Atoms                     | X                                                                                   | Y                                                                                    | Z        | -849.9495 | 22.0438  | 30.7946  |
|                           |                                                                                     |                                                                                      |          | 38.5460   | 45.8870  | 55.9739  |
|                           |                                                                                     |                                                                                      |          | 62.0262   | 68.6720  | 74.0029  |
|                           |                                                                                     |                                                                                      |          | 79.7364   | 106.1964 | 122.1954 |
| N                         | -0.37540                                                                            | -0.49712                                                                             | -0.00066 | 133.4944  | 154.7033 | 163.7467 |
| N                         | 0.37532                                                                             | 0.49678                                                                              | 0.00042  | 164.1962  | 189.1081 | 216.8029 |
| C                         | 1.76540                                                                             | 0.18428                                                                              | 0.00020  | 231.7628  | 241.1125 | 249.9601 |
| C                         | 2.28268                                                                             | -1.11567                                                                             | 0.00052  | 258.0443  | 265.0051 | 266.7090 |
| C                         | 2.62286                                                                             | 1.28323                                                                              | -0.00014 | 278.7151  | 297.1168 | 305.2679 |
| C                         | 3.65764                                                                             | -1.29991                                                                             | 0.00039  | 316.7623  | 335.3625 | 337.4558 |
| H                         | 1.59580                                                                             | -1.95391                                                                             | 0.00087  | 356.2527  | 379.7081 | 404.7338 |
| C                         | 4.00071                                                                             | 1.09144                                                                              | -0.00036 | 405.6264  | 407.6589 | 420.1606 |
| H                         | 2.18529                                                                             | 2.27626                                                                              | -0.00029 | 437.5966  | 443.6819 | 456.9931 |

|   |          |          |          |           |           |           |
|---|----------|----------|----------|-----------|-----------|-----------|
| C | 4.51876  | -0.20015 | -0.00010 | 460.2910  | 462.6156  | 478.8746  |
| H | 4.06571  | -2.30567 | 0.00068  | 479.9311  | 485.3730  | 487.1899  |
| H | 4.66732  | 1.94739  | -0.00073 | 490.6073  | 508.5719  | 520.7170  |
| H | 5.59301  | -0.35476 | -0.00022 | 531.2266  | 534.3611  | 557.3763  |
| C | -1.76545 | -0.18454 | -0.00036 | 577.6541  | 583.0106  | 584.2658  |
| C | -2.28245 | 1.11551  | -0.00005 | 589.0546  | 595.3560  | 595.7552  |
| C | -2.62311 | -1.28332 | -0.00051 | 610.6514  | 620.3055  | 624.9664  |
| C | -3.65737 | 1.30009  | 0.00033  | 633.0487  | 677.7186  | 684.5392  |
| H | -1.59539 | 1.95358  | -0.00014 | 686.3914  | 699.4967  | 710.1587  |
| C | -4.00089 | -1.09118 | -0.00009 | 711.6770  | 715.7859  | 716.3417  |
| H | -2.18588 | -2.27650 | -0.00086 | 735.4103  | 743.4431  | 746.6183  |
| C | -4.51869 | 0.20052  | 0.00038  | 759.7126  | 765.9381  | 774.9063  |
| H | -4.06519 | 2.30595  | 0.00055  | 779.2135  | 784.1360  | 788.2332  |
| H | -4.66771 | -1.94697 | -0.00020 | 806.6618  | 818.5704  | 821.2116  |
| H | -5.59292 | 0.35526  | 0.00068  | 828.6103  | 842.2204  | 857.0561  |
| C | 3.81972  | -1.44756 | -0.11029 | 859.9107  | 865.7437  | 872.2479  |
| C | 2.43874  | -3.43571 | -0.12938 | 873.4667  | 875.1367  | 878.7688  |
| C | 3.82628  | 1.39527  | -0.09170 | 888.2435  | 903.2706  | 909.2636  |
| C | 5.04592  | -0.71999 | -0.18079 | 910.2556  | 921.3793  | 945.1521  |
| C | 3.68573  | -2.85612 | -0.15703 | 952.1354  | 962.1644  | 973.1493  |
| H | 2.32963  | -4.51250 | -0.19077 | 976.0693  | 993.0715  | 1009.4133 |
| C | 3.72116  | 2.82537  | -0.09574 | 1010.8533 | 1013.8242 | 1014.5981 |
| C | 5.04215  | 0.64935  | -0.16783 | 1014.9842 | 1015.6243 | 1018.8271 |
| C | 1.27913  | 2.64979  | 0.02889  | 1019.4424 | 1022.5672 | 1027.0178 |
| H | 5.97926  | -1.26824 | -0.25207 | 1032.6437 | 1033.5793 | 1065.3425 |
| H | 4.57397  | -3.47685 | -0.23081 | 1069.0553 | 1120.4002 | 1127.8288 |
| C | 2.50038  | 3.42118  | -0.03734 | 1130.6918 | 1131.7533 | 1139.1913 |
| H | 4.62414  | 3.42615  | -0.14688 | 1140.3883 | 1155.9998 | 1158.0241 |
| H | 5.97941  | 1.19435  | -0.22462 | 1178.2415 | 1181.5464 | 1187.4743 |
| H | 2.41296  | 4.50196  | -0.04125 | 1187.7979 | 1189.3581 | 1200.6919 |
| N | 1.39837  | -1.30919 | 0.06494  | 1207.4150 | 1225.2021 | 1232.5856 |
| N | 1.39857  | 1.30012  | 0.04294  | 1241.5009 | 1245.1708 | 1246.4370 |
| H | 0.19989  | 0.13900  | 1.59991  | 1255.1796 | 1259.3628 | 1261.1558 |
| C | -0.04820 | -3.26690 | -0.06233 | 1277.4984 | 1292.6839 | 1305.0278 |
| H | -0.03262 | -4.33522 | -0.25561 | 1330.7174 | 1344.4891 | 1353.2067 |
| C | 0.02703  | 3.28554  | 0.04759  | 1369.6629 | 1377.1259 | 1395.6835 |
| H | 0.03107  | 4.36759  | 0.00562  | 1400.4183 | 1405.3249 | 1411.7191 |
| H | -1.39197 | -1.36276 | 1.51537  | 1422.1110 | 1437.4147 | 1439.9795 |
|   |          |          |          | 1461.4012 | 1462.5364 | 1469.4991 |
|   |          |          |          | 1473.6258 | 1477.7818 | 1486.1516 |
|   |          |          |          | 1495.9089 | 1502.3839 | 1511.1878 |
|   |          |          |          | 1515.2988 | 1517.6208 | 1528.6776 |
|   |          |          |          | 1536.4835 | 1544.4723 | 1568.4035 |
|   |          |          |          | 1576.9077 | 1580.3945 | 1605.4475 |
|   |          |          |          | 1620.9800 | 1650.4281 | 1652.8822 |
|   |          |          |          | 1660.2600 | 1682.0648 | 1684.8966 |
|   |          |          |          | 1687.8376 | 1688.6580 | 1692.9687 |
|   |          |          |          | 1697.6880 | 1710.2741 | 3201.8787 |
|   |          |          |          | 3208.1984 | 3209.8829 | 3211.7423 |
|   |          |          |          | 3213.2832 | 3215.5586 | 3216.2823 |
|   |          |          |          | 3217.4121 | 3218.0575 | 3220.4928 |
|   |          |          |          | 3221.0864 | 3222.5722 | 3222.6202 |
|   |          |          |          | 3228.3582 | 3228.9804 | 3230.7854 |
|   |          |          |          | 3231.6727 | 3235.8974 | 3237.6570 |

|  |           |           |           |
|--|-----------|-----------|-----------|
|  | 3237.6992 | 3242.6738 | 3242.8864 |
|  | 3249.3440 | 3253.1638 | 3550.8419 |

### Statistical Thermodynamic Analysis

|                                        |                                                 |
|----------------------------------------|-------------------------------------------------|
| Temperature = 353.15 K                 | Pressure = 1 atm                                |
| Zero-point correction = 0.553355       | Electronic Energy = -1936.39831071              |
| Internal Energy (E) = -1935.80010371   | Enthalpy (H) = -1935.79898571                   |
| Gibbs Free Energy (G) = -1935.92445371 | Gibbs Free Energy of Solvation = -1935.97735028 |

| St. Pt.                         | General Structure                                                                 | Ball & Stick model                                                                  |   |          |          |          |
|---------------------------------|-----------------------------------------------------------------------------------|-------------------------------------------------------------------------------------|---|----------|----------|----------|
| <b>14</b> <sup>Hyd1</sup> (MLC) | 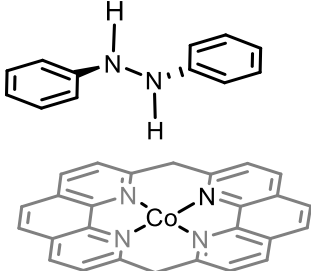 |  |   |          |          |          |
| Cartesian co-ordinate           |                                                                                   | Frequencies                                                                         |   |          |          |          |
| -----                           |                                                                                   |                                                                                     |   |          |          |          |
| Atoms                           | X                                                                                 | Y                                                                                   | Z | -17.6522 | 25.5789  | 28.0367  |
|                                 |                                                                                   |                                                                                     |   | 41.7139  | 47.9439  | 61.8288  |
|                                 |                                                                                   |                                                                                     |   | 65.3623  | 83.4470  | 88.3408  |
|                                 |                                                                                   |                                                                                     |   | 98.6831  | 103.5785 | 128.6043 |
|                                 |                                                                                   |                                                                                     |   | 153.7812 | 167.9630 | 184.8492 |
|                                 |                                                                                   |                                                                                     |   | 195.7755 | 216.4606 | 230.2787 |
|                                 |                                                                                   |                                                                                     |   | 248.0924 | 252.2502 | 255.3021 |
|                                 |                                                                                   |                                                                                     |   | 263.5521 | 275.4594 | 277.9176 |
|                                 |                                                                                   |                                                                                     |   | 288.1629 | 303.0727 | 334.3010 |
|                                 |                                                                                   |                                                                                     |   | 346.4800 | 352.7944 | 356.9843 |
|                                 |                                                                                   |                                                                                     |   | 386.2347 | 408.8669 | 409.3418 |
|                                 |                                                                                   |                                                                                     |   | 413.1752 | 414.4539 | 418.2877 |
|                                 |                                                                                   |                                                                                     |   | 448.0857 | 454.1572 | 460.4233 |
|                                 |                                                                                   |                                                                                     |   | 466.2541 | 482.5498 | 486.6498 |
|                                 |                                                                                   |                                                                                     |   | 487.3726 | 491.7659 | 496.1500 |
|                                 |                                                                                   |                                                                                     |   | 507.0136 | 527.2982 | 540.5481 |
|                                 |                                                                                   |                                                                                     |   | 555.8059 | 563.2996 | 575.0740 |
|                                 |                                                                                   |                                                                                     |   | 582.8615 | 585.8240 | 587.3206 |
|                                 |                                                                                   |                                                                                     |   | 594.6087 | 596.3146 | 622.2509 |
|                                 |                                                                                   |                                                                                     |   | 623.7360 | 630.2092 | 673.9146 |
|                                 |                                                                                   |                                                                                     |   | 677.4598 | 684.5717 | 685.9924 |
|                                 |                                                                                   |                                                                                     |   | 704.8219 | 712.5861 | 715.1856 |
|                                 |                                                                                   |                                                                                     |   | 715.9234 | 717.3958 | 722.9052 |
|                                 |                                                                                   |                                                                                     |   | 744.5109 | 745.7673 | 758.4223 |
|                                 |                                                                                   |                                                                                     |   | 765.9277 | 780.3759 | 783.4295 |
|                                 |                                                                                   |                                                                                     |   | 785.0558 | 787.4438 | 813.4189 |
|                                 |                                                                                   |                                                                                     |   | 821.1255 | 825.8091 | 837.5816 |

|   |          |          |          |           |           |           |
|---|----------|----------|----------|-----------|-----------|-----------|
| H | -4.66771 | -1.94697 | -0.00020 | 840.0622  | 845.6028  | 851.7650  |
| H | -5.59292 | 0.35526  | 0.00068  | 859.4777  | 862.9646  | 863.3542  |
| C | 3.81972  | -1.44756 | -0.11029 | 879.6425  | 881.7648  | 882.1104  |
| C | 2.43874  | -3.43571 | -0.12938 | 892.2643  | 908.7031  | 914.7334  |
| C | 3.82628  | 1.39527  | -0.09170 | 921.7044  | 932.6184  | 941.5967  |
| C | 5.04592  | -0.71999 | -0.18079 | 948.6197  | 984.7645  | 987.0151  |
| C | 3.68573  | -2.85612 | -0.15703 | 987.6782  | 987.8209  | 1008.5031 |
| H | 2.32963  | -4.51250 | -0.19077 | 1015.1116 | 1016.4064 | 1018.8087 |
| C | 3.72116  | 2.82537  | -0.09574 | 1021.1428 | 1021.3929 | 1022.0645 |
| C | 5.04215  | 0.64935  | -0.16783 | 1022.5177 | 1023.0419 | 1041.2692 |
| C | 1.27913  | 2.64979  | 0.02889  | 1058.3518 | 1067.1537 | 1080.3945 |
| H | 5.97926  | -1.26824 | -0.25207 | 1113.8697 | 1123.3081 | 1128.0225 |
| H | 4.57397  | -3.47685 | -0.23081 | 1136.1529 | 1147.6767 | 1161.9074 |
| C | 2.50038  | 3.42118  | -0.03734 | 1167.1569 | 1174.7656 | 1184.6628 |
| H | 4.62414  | 3.42615  | -0.14688 | 1185.6264 | 1186.8909 | 1191.0672 |
| H | 5.97941  | 1.19435  | -0.22462 | 1196.6384 | 1199.1616 | 1213.8717 |
| H | 2.41296  | 4.50196  | -0.04125 | 1233.2605 | 1234.4053 | 1241.3603 |
| N | 1.39837  | -1.30919 | 0.06494  | 1251.5026 | 1255.3203 | 1263.5126 |
| N | 1.39857  | 1.30012  | 0.04294  | 1264.6419 | 1285.1862 | 1292.5142 |
| H | 0.19989  | 0.13900  | 1.59991  | 1304.6481 | 1311.3677 | 1337.1188 |
| C | -0.04820 | -3.26690 | -0.06233 | 1338.7641 | 1347.9485 | 1366.2881 |
| H | -0.03262 | -4.33522 | -0.25561 | 1369.8074 | 1389.9625 | 1398.7026 |
| C | 0.02703  | 3.28554  | 0.04759  | 1420.6495 | 1430.1896 | 1432.9024 |
| H | 0.03107  | 4.36759  | 0.00562  | 1433.4577 | 1443.7844 | 1460.5766 |
| H | -1.39197 | -1.36276 | 1.51537  | 1462.2560 | 1464.9609 | 1468.5811 |
|   |          |          |          | 1479.9319 | 1486.8391 | 1495.3600 |
|   |          |          |          | 1501.0406 | 1515.2238 | 1524.2754 |
|   |          |          |          | 1531.5409 | 1545.3399 | 1555.9675 |
|   |          |          |          | 1557.6857 | 1565.4401 | 1576.5374 |
|   |          |          |          | 1581.7121 | 1626.1324 | 1627.1294 |
|   |          |          |          | 1660.2851 | 1673.1052 | 1692.7839 |
|   |          |          |          | 1695.2462 | 1699.1455 | 1700.4143 |
|   |          |          |          | 1703.0282 | 1705.7810 | 1707.1783 |
|   |          |          |          | 1716.9189 | 3175.6188 | 3181.2960 |
|   |          |          |          | 3201.5876 | 3206.7615 | 3207.7928 |
|   |          |          |          | 3211.7070 | 3215.2047 | 3216.0813 |
|   |          |          |          | 3217.8510 | 3219.6151 | 3220.8211 |
|   |          |          |          | 3220.8624 | 3220.9011 | 3222.8318 |
|   |          |          |          | 3223.0942 | 3224.2713 | 3225.6226 |
|   |          |          |          | 3227.6918 | 3239.5658 | 3240.4170 |
|   |          |          |          | 3240.5779 | 3245.9413 | 3247.8513 |
|   |          |          |          | 3248.8113 | 3500.9540 | 3575.4312 |

### Statistical Thermodynamic Analysis

Temperature = 353.15 K

Pressure = 1 atm

Zero-point correction = 0.562389

Electronic Energy = -1936.47746412

Internal Energy (E) = -1935.87143412

Enthalpy (H) = -1935.87031612

Gibbs Free Energy (G) = -1935.99242912

Gibbs Free Energy of Solvation = -1936.04759042

| St. Pt.                                          | General Structure                                                                 | Ball & Stick model                                                                 |          |           |           |           |
|--------------------------------------------------|-----------------------------------------------------------------------------------|------------------------------------------------------------------------------------|----------|-----------|-----------|-----------|
| Hydrazobenzene<br>(Cs <sup>+</sup> -coordinated) | 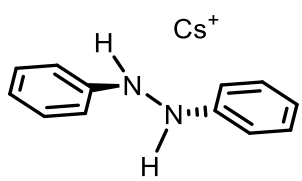 |  |          |           |           |           |
| <b>Cartesian co-ordinate</b>                     |                                                                                   | <b>Frequencies</b>                                                                 |          |           |           |           |
| -----                                            |                                                                                   |                                                                                    |          |           |           |           |
| <b>Atoms</b>                                     | <b>X</b>                                                                          | <b>Y</b>                                                                           | <b>Z</b> |           |           |           |
| -----                                            |                                                                                   |                                                                                    |          |           |           |           |
| N                                                | 0.55028                                                                           | 2.32408                                                                            | -0.82740 | 29.2412   | 39.6213   | 43.3109   |
| N                                                | -0.54762                                                                          | 2.68055                                                                            | -0.05672 | 62.2534   | 100.9270  | 110.7705  |
| C                                                | -1.53113                                                                          | 1.67478                                                                            | 0.03206  | 175.9298  | 214.4776  | 251.0566  |
| C                                                | -2.08469                                                                          | 1.30294                                                                            | 1.26086  | 327.0320  | 396.4422  | 420.8715  |
| C                                                | -1.97825                                                                          | 1.04943                                                                            | -1.14050 | 423.5349  | 454.8735  | 478.1922  |
| C                                                | -3.07348                                                                          | 0.32093                                                                            | 1.31583  | 527.9849  | 531.2374  | 594.3131  |
| H                                                | -1.75333                                                                          | 1.79240                                                                            | 2.17372  | 624.1514  | 629.0093  | 661.8544  |
| C                                                | -2.96423                                                                          | 0.07010                                                                            | -1.07621 | 712.5827  | 713.9675  | 766.0431  |
| H                                                | -1.56292                                                                          | 1.36600                                                                            | -2.09154 | 786.4989  | 792.8066  | 852.1004  |
| C                                                | -3.51235                                                                          | -0.30873                                                                           | 0.15241  | 862.8007  | 868.3576  | 877.3254  |
| H                                                | -3.50543                                                                          | 0.05370                                                                            | 2.27510  | 919.3970  | 929.0565  | 999.5661  |
| H                                                | -3.33006                                                                          | -0.37886                                                                           | -1.99522 | 1000.7311 | 1009.1618 | 1010.3103 |
| H                                                | -4.29697                                                                          | -1.05644                                                                           | 0.19757  | 1019.8123 | 1023.4213 | 1063.9766 |
| C                                                | 1.55284                                                                           | 1.51899                                                                            | -0.26755 | 1069.7219 | 1111.8962 | 1125.7243 |
| C                                                | 2.57342                                                                           | 1.03639                                                                            | -1.10339 | 1176.9051 | 1186.5460 | 1198.1817 |
| C                                                | 1.52644                                                                           | 1.11662                                                                            | 1.07431  | 1201.6196 | 1214.0833 | 1281.2209 |
| C                                                | 3.53929                                                                           | 0.17265                                                                            | -0.60458 | 1322.9463 | 1340.3414 | 1351.4336 |
| H                                                | 2.59701                                                                           | 1.34604                                                                            | -2.14455 | 1360.6387 | 1372.6873 | 1462.7916 |
| C                                                | 2.50452                                                                           | 0.24790                                                                            | 1.56385  | 1479.1599 | 1526.8517 | 1535.8371 |
| H                                                | 0.75747                                                                           | 1.48483                                                                            | 1.74416  | 1554.1096 | 1556.5407 | 1671.7775 |
| C                                                | 3.50750                                                                           | -0.23907                                                                           | 0.73169  | 1678.6381 | 1692.3932 | 1699.2944 |
| H                                                | 4.32665                                                                           | -0.18078                                                                           | -1.26264 | 3190.8341 | 3209.1996 | 3211.3112 |
| H                                                | 2.48615                                                                           | -0.03088                                                                           | 2.61352  | 3215.5966 | 3219.8443 | 3225.1768 |
| H                                                | 4.27156                                                                           | -0.90311                                                                           | 1.12010  | 3229.2065 | 3234.5222 | 3235.2384 |
| H                                                | 0.84940                                                                           | 3.04753                                                                            | -1.46726 | 3242.1098 | 3520.6391 | 3631.4036 |
| H                                                | -0.31192                                                                          | 3.11093                                                                            | 0.83413  |           |           |           |
| Cs                                               | -0.01646                                                                          | -1.68112                                                                           | -0.13529 |           |           |           |
| C                                                | -5.04390                                                                          | 0.68674                                                                            | -0.04268 |           |           |           |
| C                                                | -3.70087                                                                          | 2.84513                                                                            | -0.02388 |           |           |           |
| H                                                | -2.37687                                                                          | 4.51148                                                                            | -0.00260 |           |           |           |
| C                                                | -3.70086                                                                          | -2.84511                                                                           | -0.02396 |           |           |           |
| C                                                | -5.04390                                                                          | -0.68672                                                                           | -0.04268 |           |           |           |
| C                                                | -1.25756                                                                          | -2.64674                                                                           | 0.00047  |           |           |           |
| H                                                | -5.98116                                                                          | 1.23509                                                                            | -0.05313 |           |           |           |
| H                                                | -4.60015                                                                          | 3.45511                                                                            | -0.02958 |           |           |           |
| C                                                | -2.47341                                                                          | -3.43094                                                                           | -0.00962 |           |           |           |
| H                                                | -4.60014                                                                          | -3.45510                                                                           | -0.02964 |           |           |           |



|   |          |          |          |
|---|----------|----------|----------|
| H | -5.98117 | -1.23506 | -0.05312 |
| H | -2.37687 | -4.51149 | -0.00276 |
| N | -1.38780 | 1.30028  | -0.01186 |
| N | -1.38782 | -1.30028 | -0.01191 |
| H | 0.00022  | -0.00008 | 1.45530  |
| C | -0.00001 | 3.27742  | 0.01504  |
| H | -0.00000 | 4.36099  | 0.02340  |
| C | -0.00000 | -3.27741 | 0.01489  |
| H | 0.00001  | -4.36099 | 0.02318  |

### Statistical Thermodynamic Analysis

Temperature = 403.15 K

Pressure = 1 atm

Zero-point correction = 0.218343

Electronic Energy = -593.434389987

Internal Energy (E) = -593.192797987

Enthalpy (H) = -593.191520987

Gibbs Free Energy (G) = -593.281147987

Gibbs Free Energy of Solvation = -593.361060111

| St. Pt.                                                                                                                                                                                                                                                                                                                                                                                                                                                                                                                                                                                                                                            | General Structure | Ball & Stick model |          |   |   |   |         |         |          |   |          |         |          |   |          |         |         |   |          |         |         |   |          |         |          |   |          |         |         |                                                                                                                                                                                                                                                                                                                                                                                                                                                                                                                                                                                                                                                                                                                          |         |         |         |         |         |         |         |         |         |         |         |         |          |          |          |          |          |          |          |          |          |          |          |          |          |          |          |          |          |          |
|----------------------------------------------------------------------------------------------------------------------------------------------------------------------------------------------------------------------------------------------------------------------------------------------------------------------------------------------------------------------------------------------------------------------------------------------------------------------------------------------------------------------------------------------------------------------------------------------------------------------------------------------------|-------------------|--------------------|----------|---|---|---|---------|---------|----------|---|----------|---------|----------|---|----------|---------|---------|---|----------|---------|---------|---|----------|---------|----------|---|----------|---------|---------|--------------------------------------------------------------------------------------------------------------------------------------------------------------------------------------------------------------------------------------------------------------------------------------------------------------------------------------------------------------------------------------------------------------------------------------------------------------------------------------------------------------------------------------------------------------------------------------------------------------------------------------------------------------------------------------------------------------------------|---------|---------|---------|---------|---------|---------|---------|---------|---------|---------|---------|---------|----------|----------|----------|----------|----------|----------|----------|----------|----------|----------|----------|----------|----------|----------|----------|----------|----------|----------|
| 12Hyd2(spill)                                                                                                                                                                                                                                                                                                                                                                                                                                                                                                                                                                                                                                      |                   |                    |          |   |   |   |         |         |          |   |          |         |          |   |          |         |         |   |          |         |         |   |          |         |          |   |          |         |         |                                                                                                                                                                                                                                                                                                                                                                                                                                                                                                                                                                                                                                                                                                                          |         |         |         |         |         |         |         |         |         |         |         |         |          |          |          |          |          |          |          |          |          |          |          |          |          |          |          |          |          |          |
| <p style="text-align: center;"><b>Cartesian co-ordinate</b></p> <p>-----</p> <table border="1"> <thead> <tr> <th>Atoms</th> <th>X</th> <th>Y</th> <th>Z</th> </tr> </thead> <tbody> <tr><td>N</td><td>0.55028</td><td>2.32408</td><td>-0.82740</td></tr> <tr><td>N</td><td>-0.54762</td><td>2.68055</td><td>-0.05672</td></tr> <tr><td>C</td><td>-1.53113</td><td>1.67478</td><td>0.03206</td></tr> <tr><td>C</td><td>-2.08469</td><td>1.30294</td><td>1.26086</td></tr> <tr><td>C</td><td>-1.97825</td><td>1.04943</td><td>-1.14050</td></tr> <tr><td>C</td><td>-3.07348</td><td>0.32093</td><td>1.31583</td></tr> </tbody> </table> <p>-----</p> |                   | Atoms              | X        | Y | Z | N | 0.55028 | 2.32408 | -0.82740 | N | -0.54762 | 2.68055 | -0.05672 | C | -1.53113 | 1.67478 | 0.03206 | C | -2.08469 | 1.30294 | 1.26086 | C | -1.97825 | 1.04943 | -1.14050 | C | -3.07348 | 0.32093 | 1.31583 | <p style="text-align: center;"><b>Frequencies</b></p> <table border="1"> <tbody> <tr><td>13.8271</td><td>20.3766</td><td>22.5781</td></tr> <tr><td>26.2347</td><td>43.4408</td><td>45.4681</td></tr> <tr><td>48.4922</td><td>53.9949</td><td>56.5788</td></tr> <tr><td>66.4660</td><td>72.7185</td><td>97.3163</td></tr> <tr><td>110.7590</td><td>113.6621</td><td>119.6405</td></tr> <tr><td>139.5463</td><td>163.2853</td><td>169.7066</td></tr> <tr><td>196.5289</td><td>217.8244</td><td>232.8507</td></tr> <tr><td>242.4713</td><td>248.6808</td><td>257.2763</td></tr> <tr><td>258.0857</td><td>264.6861</td><td>267.0677</td></tr> <tr><td>282.1914</td><td>305.8551</td><td>338.4345</td></tr> </tbody> </table> | 13.8271 | 20.3766 | 22.5781 | 26.2347 | 43.4408 | 45.4681 | 48.4922 | 53.9949 | 56.5788 | 66.4660 | 72.7185 | 97.3163 | 110.7590 | 113.6621 | 119.6405 | 139.5463 | 163.2853 | 169.7066 | 196.5289 | 217.8244 | 232.8507 | 242.4713 | 248.6808 | 257.2763 | 258.0857 | 264.6861 | 267.0677 | 282.1914 | 305.8551 | 338.4345 |
| Atoms                                                                                                                                                                                                                                                                                                                                                                                                                                                                                                                                                                                                                                              | X                 | Y                  | Z        |   |   |   |         |         |          |   |          |         |          |   |          |         |         |   |          |         |         |   |          |         |          |   |          |         |         |                                                                                                                                                                                                                                                                                                                                                                                                                                                                                                                                                                                                                                                                                                                          |         |         |         |         |         |         |         |         |         |         |         |         |          |          |          |          |          |          |          |          |          |          |          |          |          |          |          |          |          |          |
| N                                                                                                                                                                                                                                                                                                                                                                                                                                                                                                                                                                                                                                                  | 0.55028           | 2.32408            | -0.82740 |   |   |   |         |         |          |   |          |         |          |   |          |         |         |   |          |         |         |   |          |         |          |   |          |         |         |                                                                                                                                                                                                                                                                                                                                                                                                                                                                                                                                                                                                                                                                                                                          |         |         |         |         |         |         |         |         |         |         |         |         |          |          |          |          |          |          |          |          |          |          |          |          |          |          |          |          |          |          |
| N                                                                                                                                                                                                                                                                                                                                                                                                                                                                                                                                                                                                                                                  | -0.54762          | 2.68055            | -0.05672 |   |   |   |         |         |          |   |          |         |          |   |          |         |         |   |          |         |         |   |          |         |          |   |          |         |         |                                                                                                                                                                                                                                                                                                                                                                                                                                                                                                                                                                                                                                                                                                                          |         |         |         |         |         |         |         |         |         |         |         |         |          |          |          |          |          |          |          |          |          |          |          |          |          |          |          |          |          |          |
| C                                                                                                                                                                                                                                                                                                                                                                                                                                                                                                                                                                                                                                                  | -1.53113          | 1.67478            | 0.03206  |   |   |   |         |         |          |   |          |         |          |   |          |         |         |   |          |         |         |   |          |         |          |   |          |         |         |                                                                                                                                                                                                                                                                                                                                                                                                                                                                                                                                                                                                                                                                                                                          |         |         |         |         |         |         |         |         |         |         |         |         |          |          |          |          |          |          |          |          |          |          |          |          |          |          |          |          |          |          |
| C                                                                                                                                                                                                                                                                                                                                                                                                                                                                                                                                                                                                                                                  | -2.08469          | 1.30294            | 1.26086  |   |   |   |         |         |          |   |          |         |          |   |          |         |         |   |          |         |         |   |          |         |          |   |          |         |         |                                                                                                                                                                                                                                                                                                                                                                                                                                                                                                                                                                                                                                                                                                                          |         |         |         |         |         |         |         |         |         |         |         |         |          |          |          |          |          |          |          |          |          |          |          |          |          |          |          |          |          |          |
| C                                                                                                                                                                                                                                                                                                                                                                                                                                                                                                                                                                                                                                                  | -1.97825          | 1.04943            | -1.14050 |   |   |   |         |         |          |   |          |         |          |   |          |         |         |   |          |         |         |   |          |         |          |   |          |         |         |                                                                                                                                                                                                                                                                                                                                                                                                                                                                                                                                                                                                                                                                                                                          |         |         |         |         |         |         |         |         |         |         |         |         |          |          |          |          |          |          |          |          |          |          |          |          |          |          |          |          |          |          |
| C                                                                                                                                                                                                                                                                                                                                                                                                                                                                                                                                                                                                                                                  | -3.07348          | 0.32093            | 1.31583  |   |   |   |         |         |          |   |          |         |          |   |          |         |         |   |          |         |         |   |          |         |          |   |          |         |         |                                                                                                                                                                                                                                                                                                                                                                                                                                                                                                                                                                                                                                                                                                                          |         |         |         |         |         |         |         |         |         |         |         |         |          |          |          |          |          |          |          |          |          |          |          |          |          |          |          |          |          |          |
| 13.8271                                                                                                                                                                                                                                                                                                                                                                                                                                                                                                                                                                                                                                            | 20.3766           | 22.5781            |          |   |   |   |         |         |          |   |          |         |          |   |          |         |         |   |          |         |         |   |          |         |          |   |          |         |         |                                                                                                                                                                                                                                                                                                                                                                                                                                                                                                                                                                                                                                                                                                                          |         |         |         |         |         |         |         |         |         |         |         |         |          |          |          |          |          |          |          |          |          |          |          |          |          |          |          |          |          |          |
| 26.2347                                                                                                                                                                                                                                                                                                                                                                                                                                                                                                                                                                                                                                            | 43.4408           | 45.4681            |          |   |   |   |         |         |          |   |          |         |          |   |          |         |         |   |          |         |         |   |          |         |          |   |          |         |         |                                                                                                                                                                                                                                                                                                                                                                                                                                                                                                                                                                                                                                                                                                                          |         |         |         |         |         |         |         |         |         |         |         |         |          |          |          |          |          |          |          |          |          |          |          |          |          |          |          |          |          |          |
| 48.4922                                                                                                                                                                                                                                                                                                                                                                                                                                                                                                                                                                                                                                            | 53.9949           | 56.5788            |          |   |   |   |         |         |          |   |          |         |          |   |          |         |         |   |          |         |         |   |          |         |          |   |          |         |         |                                                                                                                                                                                                                                                                                                                                                                                                                                                                                                                                                                                                                                                                                                                          |         |         |         |         |         |         |         |         |         |         |         |         |          |          |          |          |          |          |          |          |          |          |          |          |          |          |          |          |          |          |
| 66.4660                                                                                                                                                                                                                                                                                                                                                                                                                                                                                                                                                                                                                                            | 72.7185           | 97.3163            |          |   |   |   |         |         |          |   |          |         |          |   |          |         |         |   |          |         |         |   |          |         |          |   |          |         |         |                                                                                                                                                                                                                                                                                                                                                                                                                                                                                                                                                                                                                                                                                                                          |         |         |         |         |         |         |         |         |         |         |         |         |          |          |          |          |          |          |          |          |          |          |          |          |          |          |          |          |          |          |
| 110.7590                                                                                                                                                                                                                                                                                                                                                                                                                                                                                                                                                                                                                                           | 113.6621          | 119.6405           |          |   |   |   |         |         |          |   |          |         |          |   |          |         |         |   |          |         |         |   |          |         |          |   |          |         |         |                                                                                                                                                                                                                                                                                                                                                                                                                                                                                                                                                                                                                                                                                                                          |         |         |         |         |         |         |         |         |         |         |         |         |          |          |          |          |          |          |          |          |          |          |          |          |          |          |          |          |          |          |
| 139.5463                                                                                                                                                                                                                                                                                                                                                                                                                                                                                                                                                                                                                                           | 163.2853          | 169.7066           |          |   |   |   |         |         |          |   |          |         |          |   |          |         |         |   |          |         |         |   |          |         |          |   |          |         |         |                                                                                                                                                                                                                                                                                                                                                                                                                                                                                                                                                                                                                                                                                                                          |         |         |         |         |         |         |         |         |         |         |         |         |          |          |          |          |          |          |          |          |          |          |          |          |          |          |          |          |          |          |
| 196.5289                                                                                                                                                                                                                                                                                                                                                                                                                                                                                                                                                                                                                                           | 217.8244          | 232.8507           |          |   |   |   |         |         |          |   |          |         |          |   |          |         |         |   |          |         |         |   |          |         |          |   |          |         |         |                                                                                                                                                                                                                                                                                                                                                                                                                                                                                                                                                                                                                                                                                                                          |         |         |         |         |         |         |         |         |         |         |         |         |          |          |          |          |          |          |          |          |          |          |          |          |          |          |          |          |          |          |
| 242.4713                                                                                                                                                                                                                                                                                                                                                                                                                                                                                                                                                                                                                                           | 248.6808          | 257.2763           |          |   |   |   |         |         |          |   |          |         |          |   |          |         |         |   |          |         |         |   |          |         |          |   |          |         |         |                                                                                                                                                                                                                                                                                                                                                                                                                                                                                                                                                                                                                                                                                                                          |         |         |         |         |         |         |         |         |         |         |         |         |          |          |          |          |          |          |          |          |          |          |          |          |          |          |          |          |          |          |
| 258.0857                                                                                                                                                                                                                                                                                                                                                                                                                                                                                                                                                                                                                                           | 264.6861          | 267.0677           |          |   |   |   |         |         |          |   |          |         |          |   |          |         |         |   |          |         |         |   |          |         |          |   |          |         |         |                                                                                                                                                                                                                                                                                                                                                                                                                                                                                                                                                                                                                                                                                                                          |         |         |         |         |         |         |         |         |         |         |         |         |          |          |          |          |          |          |          |          |          |          |          |          |          |          |          |          |          |          |
| 282.1914                                                                                                                                                                                                                                                                                                                                                                                                                                                                                                                                                                                                                                           | 305.8551          | 338.4345           |          |   |   |   |         |         |          |   |          |         |          |   |          |         |         |   |          |         |         |   |          |         |          |   |          |         |         |                                                                                                                                                                                                                                                                                                                                                                                                                                                                                                                                                                                                                                                                                                                          |         |         |         |         |         |         |         |         |         |         |         |         |          |          |          |          |          |          |          |          |          |          |          |          |          |          |          |          |          |          |

|    |          |          |          |           |           |           |
|----|----------|----------|----------|-----------|-----------|-----------|
| H  | -1.75333 | 1.79240  | 2.17372  | 339.4514  | 348.6568  | 351.7180  |
| C  | -2.96423 | 0.07010  | -1.07621 | 385.5111  | 407.9080  | 408.5428  |
| H  | -1.56292 | 1.36600  | -2.09154 | 410.8868  | 414.1270  | 423.0692  |
| C  | -3.51235 | -0.30873 | 0.15241  | 430.2692  | 449.1763  | 460.1837  |
| H  | -3.50543 | 0.05370  | 2.27510  | 461.5406  | 478.9797  | 485.0492  |
| H  | -3.33006 | -0.37886 | -1.99522 | 486.0454  | 488.5880  | 493.8993  |
| H  | -4.29697 | -1.05644 | 0.19757  | 495.1548  | 531.9434  | 535.7534  |
| C  | 1.55284  | 1.51899  | -0.26755 | 536.9581  | 545.9328  | 558.9439  |
| C  | 2.57342  | 1.03639  | -1.10339 | 585.7968  | 586.5736  | 596.0953  |
| C  | 1.52644  | 1.11662  | 1.07431  | 598.1054  | 598.8223  | 608.7432  |
| C  | 3.53929  | 0.17265  | -0.60458 | 625.8695  | 629.0783  | 630.5169  |
| H  | 2.59701  | 1.34604  | -2.14455 | 669.0208  | 679.3440  | 688.8093  |
| C  | 2.50452  | 0.24790  | 1.56385  | 690.6683  | 710.4199  | 712.0250  |
| H  | 0.75747  | 1.48483  | 1.74416  | 715.0602  | 715.8416  | 725.5868  |
| C  | 3.50750  | -0.23907 | 0.73169  | 732.8584  | 748.7240  | 751.1911  |
| H  | 4.32665  | -0.18078 | -1.26264 | 754.0172  | 764.1211  | 770.6820  |
| H  | 2.48615  | -0.03088 | 2.61352  | 771.1741  | 779.3029  | 785.0860  |
| H  | 4.27156  | -0.90311 | 1.12010  | 797.6077  | 803.0022  | 816.6104  |
| H  | 0.84940  | 3.04753  | -1.46726 | 823.5940  | 831.1682  | 833.6307  |
| H  | -0.31192 | 3.11093  | 0.83413  | 857.7510  | 860.3059  | 861.3582  |
| Cs | -0.01646 | -1.68112 | -0.13529 | 868.6957  | 868.8119  | 871.1788  |
| C  | -5.04390 | 0.68674  | -0.04268 | 873.5722  | 874.3388  | 882.3388  |
| C  | -3.70087 | 2.84513  | -0.02388 | 886.2683  | 907.8410  | 912.7775  |
| H  | -2.37687 | 4.51148  | -0.00260 | 920.5868  | 929.8828  | 943.1706  |
| C  | -3.70086 | -2.84511 | -0.02396 | 951.4555  | 976.2696  | 979.5196  |
| C  | -5.04390 | -0.68672 | -0.04268 | 995.0402  | 1001.2520 | 1007.5970 |
| C  | -1.25756 | -2.64674 | 0.00047  | 1010.5893 | 1011.9280 | 1014.1764 |
| H  | -5.98116 | 1.23509  | -0.05313 | 1015.4586 | 1016.2479 | 1017.9738 |
| H  | -4.60015 | 3.45511  | -0.02958 | 1019.5777 | 1020.2896 | 1042.4615 |
| C  | -2.47341 | -3.43094 | -0.00962 | 1066.7582 | 1067.6557 | 1115.7446 |
| H  | -4.60014 | -3.45510 | -0.02964 | 1117.8117 | 1124.5034 | 1138.4382 |
| H  | -5.98117 | -1.23506 | -0.05312 | 1145.4041 | 1158.4571 | 1170.7955 |
| H  | -2.37687 | -4.51149 | -0.00276 | 1172.1011 | 1178.2742 | 1182.7559 |
| N  | -1.38780 | 1.30028  | -0.01186 | 1183.4860 | 1186.8354 | 1199.3878 |
| N  | -1.38782 | -1.30028 | -0.01191 | 1204.7314 | 1208.7459 | 1236.6233 |
| H  | 0.00022  | -0.00008 | 1.45530  | 1241.6355 | 1243.7588 | 1246.2322 |
| C  | -0.00001 | 3.27742  | 0.01504  | 1259.2440 | 1259.7794 | 1276.7449 |
| H  | -0.00000 | 4.36099  | 0.02340  | 1288.5388 | 1299.7185 | 1303.9122 |
| C  | -0.00000 | -3.27741 | 0.01489  | 1323.8913 | 1330.5933 | 1347.0241 |
| H  | 0.00001  | -4.36099 | 0.02318  | 1351.3270 | 1367.2971 | 1374.1674 |
|    |          |          |          | 1384.3446 | 1396.0154 | 1415.3927 |
|    |          |          |          | 1421.2270 | 1428.4651 | 1451.8544 |
|    |          |          |          | 1458.1874 | 1461.6298 | 1469.0460 |
|    |          |          |          | 1471.8868 | 1478.0418 | 1480.5349 |
|    |          |          |          | 1482.9150 | 1484.1657 | 1486.8871 |
|    |          |          |          | 1518.6285 | 1525.5500 | 1532.0278 |
|    |          |          |          | 1537.1292 | 1552.9868 | 1560.4203 |
|    |          |          |          | 1568.3217 | 1572.1524 | 1576.1941 |
|    |          |          |          | 1625.7119 | 1633.9660 | 1656.5682 |
|    |          |          |          | 1670.9551 | 1674.8748 | 1681.4528 |
|    |          |          |          | 1693.2240 | 1696.7107 | 1699.4692 |
|    |          |          |          | 1704.8608 | 1709.2951 | 1719.1881 |
|    |          |          |          | 2123.1118 | 3195.7734 | 3199.2152 |
|    |          |          |          | 3199.5760 | 3206.0078 | 3208.1606 |
|    |          |          |          | 3209.7111 | 3212.1161 | 3212.8071 |

|  |           |           |           |
|--|-----------|-----------|-----------|
|  | 3213.2648 | 3213.7789 | 3214.1751 |
|  | 3220.5554 | 3222.5971 | 3226.8241 |
|  | 3227.3400 | 3228.2107 | 3230.2601 |
|  | 3230.7116 | 3233.6698 | 3233.6942 |
|  | 3236.1545 | 3238.8052 | 3238.9457 |
|  | 3245.2017 | 3537.9562 | 3543.8599 |

### Statistical Thermodynamic Analysis

Temperature = 403.15 K

Pressure = 1 atm

Zero-point correction = 0.569786

Electronic Energy = -1956.96386558

Internal Energy (E) = -1956.33119458

Enthalpy (H) = -1956.32991758

Gibbs Free Energy (G) = -1956.50358058

Gibbs Free Energy of Solvation = -1956.58227248

| St. Pt.                    | General Structure                                                                  | Ball & Stick model                                                                  |          |            |          |          |
|----------------------------|------------------------------------------------------------------------------------|-------------------------------------------------------------------------------------|----------|------------|----------|----------|
| TS1 <sup>Hyd2(spill)</sup> | 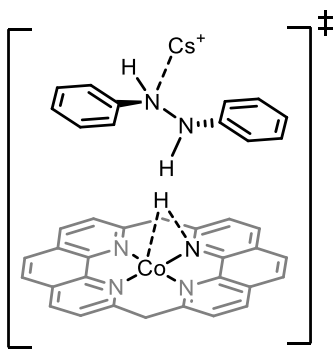 |  |          |            |          |          |
| Cartesian co-ordinate      |                                                                                    | Frequencies                                                                         |          |            |          |          |
| -----                      |                                                                                    |                                                                                     |          |            |          |          |
| Atoms                      | X                                                                                  | Y                                                                                   | Z        | -1083.2170 | 9.4802   | 18.5701  |
|                            |                                                                                    |                                                                                     |          | 20.3095    | 25.3218  | 25.6899  |
|                            |                                                                                    |                                                                                     |          | 34.9723    | 45.5456  | 55.6538  |
|                            |                                                                                    |                                                                                     |          | 58.1433    | 65.2052  | 71.5419  |
|                            |                                                                                    |                                                                                     |          | 96.9243    | 100.3832 | 109.0321 |
| N                          | 0.55028                                                                            | 2.32408                                                                             | -0.82740 | 120.5234   | 135.6660 | 161.2958 |
| N                          | -0.54762                                                                           | 2.68055                                                                             | -0.05672 | 167.0215   | 195.0990 | 215.4456 |
| C                          | -1.53113                                                                           | 1.67478                                                                             | 0.03206  | 230.9862   | 239.4907 | 241.5734 |
| C                          | -2.08469                                                                           | 1.30294                                                                             | 1.26086  | 250.8787   | 259.1873 | 263.7488 |
| C                          | -1.97825                                                                           | 1.04943                                                                             | -1.14050 | 273.4057   | 282.4345 | 301.6842 |
| C                          | -3.07348                                                                           | 0.32093                                                                             | 1.31583  | 319.1887   | 337.7094 | 343.7338 |
| H                          | -1.75333                                                                           | 1.79240                                                                             | 2.17372  | 355.8336   | 383.1358 | 402.5473 |
| C                          | -2.96423                                                                           | 0.07010                                                                             | -1.07621 | 405.9779   | 407.1226 | 410.7808 |
| H                          | -1.56292                                                                           | 1.36600                                                                             | -2.09154 | 419.9268   | 425.0906 | 447.5014 |
| C                          | -3.51235                                                                           | -0.30873                                                                            | 0.15241  | 458.4065   | 466.7658 | 479.3554 |
| H                          | -3.50543                                                                           | 0.05370                                                                             | 2.27510  | 483.2752   | 489.3987 | 493.8369 |
| H                          | -3.33006                                                                           | -0.37886                                                                            | -1.99522 | 497.2289   | 498.3172 | 521.0546 |
| H                          | -4.29697                                                                           | -1.05644                                                                            | 0.19757  | 534.8538   | 536.4488 | 558.7400 |
| C                          | 1.55284                                                                            | 1.51899                                                                             | -0.26755 | 560.9050   | 581.8591 | 583.6206 |
| C                          | 2.57342                                                                            | 1.03639                                                                             | -1.10339 | 594.7505   | 597.8062 | 600.6738 |
| C                          | 1.52644                                                                            | 1.11662                                                                             | 1.07431  | 602.0685   | 625.6219 | 626.7678 |
| C                          | 3.53929                                                                            | 0.17265                                                                             | -0.60458 | 631.8562   | 677.0865 | 683.4104 |
| H                          | 2.59701                                                                            | 1.34604                                                                             | -2.14455 |            |          |          |

|   |          |          |          |           |           |           |
|---|----------|----------|----------|-----------|-----------|-----------|
| C | 2.50452  | 0.24790  | 1.56385  | 687.1828  | 690.1052  | 706.1066  |
| H | 0.75747  | 1.48483  | 1.74416  | 710.7242  | 714.5867  | 718.6714  |
| C | 3.50750  | -0.23907 | 0.73169  | 721.5533  | 736.4772  | 746.3041  |
| H | 4.32665  | -0.18078 | -1.26264 | 753.3468  | 765.0727  | 766.7684  |
| H | 2.48615  | -0.03088 | 2.61352  | 774.1054  | 777.6953  | 788.7352  |
| H | 4.27156  | -0.90311 | 1.12010  | 796.3111  | 802.9633  | 816.1316  |
| H | 0.84940  | 3.04753  | -1.46726 | 826.0400  | 834.8895  | 846.5780  |
| H | -0.31192 | 3.11093  | 0.83413  | 856.6342  | 857.4102  | 865.3693  |
|   | -0.01646 | -1.68112 | -0.13529 | 870.0265  | 871.1561  | 874.0781  |
| C | -5.04390 | 0.68674  | -0.04268 | 878.5317  | 885.6121  | 901.9616  |
| C | -3.70087 | 2.84513  | -0.02388 | 904.1974  | 907.0207  | 917.0123  |
| H | -2.37687 | 4.51148  | -0.00260 | 931.3005  | 937.9658  | 949.5569  |
| C | -3.70086 | -2.84511 | -0.02396 | 971.4989  | 984.0937  | 986.2994  |
| C | -5.04390 | -0.68672 | -0.04268 | 996.3287  | 1001.7171 | 1004.9418 |
| C | -1.25756 | -2.64674 | 0.00047  | 1012.6505 | 1013.6393 | 1014.4942 |
| H | -5.98116 | 1.23509  | -0.05313 | 1014.9163 | 1016.1984 | 1023.5321 |
| H | -4.60015 | 3.45511  | -0.02958 | 1024.1926 | 1027.7824 | 1055.9434 |
| C | -2.47341 | -3.43094 | -0.00962 | 1068.1433 | 1068.6080 | 1115.5231 |
| H | -4.60014 | -3.45510 | -0.02964 | 1124.0503 | 1124.7295 | 1132.1037 |
| H | -5.98117 | -1.23506 | -0.05312 | 1139.0822 | 1161.6511 | 1168.8197 |
| H | -2.37687 | -4.51149 | -0.00276 | 1175.2486 | 1180.0966 | 1180.7077 |
| N | -1.38780 | 1.30028  | -0.01186 | 1186.1355 | 1188.6644 | 1198.4489 |
| N | -1.38782 | -1.30028 | -0.01191 | 1207.6328 | 1209.7054 | 1229.7773 |
| H | 0.00022  | -0.00008 | 1.45530  | 1236.7406 | 1242.1507 | 1245.6689 |
| C | -0.00001 | 3.27742  | 0.01504  | 1254.8106 | 1255.1355 | 1273.7226 |
| H | -0.00000 | 4.36099  | 0.02340  | 1287.8770 | 1294.5209 | 1299.0236 |
| C | -0.00000 | -3.27741 | 0.01489  | 1324.2290 | 1326.0988 | 1346.1102 |
| H | 0.00001  | -4.36099 | 0.02318  | 1350.4016 | 1370.8756 | 1376.1084 |
|   |          |          |          | 1378.6362 | 1395.3215 | 1410.7833 |
|   |          |          |          | 1416.2382 | 1431.8756 | 1448.2977 |
|   |          |          |          | 1454.4049 | 1462.4283 | 1466.0306 |
|   |          |          |          | 1473.2480 | 1479.0649 | 1480.3236 |
|   |          |          |          | 1483.3968 | 1489.4435 | 1494.4268 |
|   |          |          |          | 1519.1004 | 1525.1386 | 1534.1163 |
|   |          |          |          | 1540.7488 | 1553.2304 | 1563.8959 |
|   |          |          |          | 1567.5624 | 1570.8803 | 1579.1260 |
|   |          |          |          | 1620.6550 | 1641.5777 | 1654.7874 |
|   |          |          |          | 1673.3880 | 1676.8467 | 1680.1005 |
|   |          |          |          | 1694.6772 | 1695.3877 | 1700.1733 |
|   |          |          |          | 1701.9908 | 1708.4488 | 1718.4833 |
|   |          |          |          | 1886.7953 | 3186.9889 | 3197.7886 |
|   |          |          |          | 3203.0683 | 3205.4009 | 3206.3740 |
|   |          |          |          | 3208.5781 | 3209.5102 | 3210.5491 |
|   |          |          |          | 3214.6343 | 3217.4754 | 3219.7078 |
|   |          |          |          | 3221.1692 | 3221.8272 | 3222.2566 |
|   |          |          |          | 3222.7259 | 3226.7786 | 3227.9266 |
|   |          |          |          | 3230.1069 | 3233.1690 | 3234.0685 |
|   |          |          |          | 3237.9671 | 3238.6241 | 3239.0812 |
|   |          |          |          | 3246.6754 | 3517.6099 | 3537.7915 |

### Statistical Thermodynamic Analysis

Temperature = 403.15 K

Pressure = 1 atm

Zero-point correction = 0.567505

Electronic Energy = -1956.93909238

Internal Energy (E) = -1956.30879938

Enthalpy (H) = -1956.30752238

Gibbs Free Energy (G) = -1956.48294638

Gibbs Free Energy of Solvation = -1956.56145611

| St. Pt.                   | General Structure                                                                                                                                                                                                                                                                                                                                                          | Ball & Stick model                                                                                                                                                                                                                                                                       |          |          |          |          |
|---------------------------|----------------------------------------------------------------------------------------------------------------------------------------------------------------------------------------------------------------------------------------------------------------------------------------------------------------------------------------------------------------------------|------------------------------------------------------------------------------------------------------------------------------------------------------------------------------------------------------------------------------------------------------------------------------------------|----------|----------|----------|----------|
| 13 <sup>Hyd2(spill)</sup> | 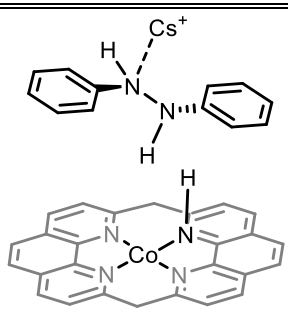 <p>The top structure shows a protonated ligand with a central nitrogen atom bonded to two phenyl rings and a hydrogen atom, with a dashed line to a Cs<sup>+</sup> ion. The bottom structure shows a cobalt atom coordinated to four nitrogen atoms in a porphyrin-like ring system.</p> |  <p>The top model shows the protonated ligand with a purple sphere representing the Cs<sup>+</sup> ion. The bottom model shows the cobalt complex with a blue sphere representing the cobalt atom.</p> |          |          |          |          |
| Cartesian co-ordinate     |                                                                                                                                                                                                                                                                                                                                                                            | Frequencies                                                                                                                                                                                                                                                                              |          |          |          |          |
| Atoms                     | X                                                                                                                                                                                                                                                                                                                                                                          | Y                                                                                                                                                                                                                                                                                        | Z        |          |          |          |
|                           |                                                                                                                                                                                                                                                                                                                                                                            |                                                                                                                                                                                                                                                                                          |          | 9.5430   | 15.9379  | 24.3918  |
|                           |                                                                                                                                                                                                                                                                                                                                                                            |                                                                                                                                                                                                                                                                                          |          | 25.9351  | 34.8880  | 39.5021  |
|                           |                                                                                                                                                                                                                                                                                                                                                                            |                                                                                                                                                                                                                                                                                          |          | 42.7461  | 58.4464  | 60.1874  |
|                           |                                                                                                                                                                                                                                                                                                                                                                            |                                                                                                                                                                                                                                                                                          |          | 65.8414  | 70.7727  | 96.4209  |
| N                         | 0.55028                                                                                                                                                                                                                                                                                                                                                                    | 2.32408                                                                                                                                                                                                                                                                                  | -0.82740 | 100.0190 | 108.7134 | 118.2872 |
| N                         | -0.54762                                                                                                                                                                                                                                                                                                                                                                   | 2.68055                                                                                                                                                                                                                                                                                  | -0.05672 | 129.3801 | 152.7403 | 161.9348 |
| C                         | -1.53113                                                                                                                                                                                                                                                                                                                                                                   | 1.67478                                                                                                                                                                                                                                                                                  | 0.03206  | 194.7158 | 213.8416 | 226.8360 |
| C                         | -2.08469                                                                                                                                                                                                                                                                                                                                                                   | 1.30294                                                                                                                                                                                                                                                                                  | 1.26086  | 229.8801 | 235.5921 | 239.5362 |
| C                         | -1.97825                                                                                                                                                                                                                                                                                                                                                                   | 1.04943                                                                                                                                                                                                                                                                                  | -1.14050 | 247.9296 | 257.2056 | 268.8008 |
| C                         | -3.07348                                                                                                                                                                                                                                                                                                                                                                   | 0.32093                                                                                                                                                                                                                                                                                  | 1.31583  | 274.2089 | 291.3365 | 318.5299 |
| H                         | -1.75333                                                                                                                                                                                                                                                                                                                                                                   | 1.79240                                                                                                                                                                                                                                                                                  | 2.17372  | 326.0172 | 337.2729 | 346.3207 |
| C                         | -2.96423                                                                                                                                                                                                                                                                                                                                                                   | 0.07010                                                                                                                                                                                                                                                                                  | -1.07621 | 365.6299 | 386.1482 | 391.1961 |
| H                         | -1.56292                                                                                                                                                                                                                                                                                                                                                                   | 1.36600                                                                                                                                                                                                                                                                                  | -2.09154 | 403.1911 | 409.2118 | 421.5191 |
| C                         | -3.51235                                                                                                                                                                                                                                                                                                                                                                   | -0.30873                                                                                                                                                                                                                                                                                 | 0.15241  | 426.2789 | 435.1487 | 442.0762 |
| H                         | -3.50543                                                                                                                                                                                                                                                                                                                                                                   | 0.05370                                                                                                                                                                                                                                                                                  | 2.27510  | 452.1768 | 468.4219 | 477.0905 |
| H                         | -3.33006                                                                                                                                                                                                                                                                                                                                                                   | -0.37886                                                                                                                                                                                                                                                                                 | -1.99522 | 481.5697 | 486.6884 | 492.4956 |
| H                         | -4.29697                                                                                                                                                                                                                                                                                                                                                                   | -1.05644                                                                                                                                                                                                                                                                                 | 0.19757  | 497.0483 | 521.4530 | 528.3279 |
| C                         | 1.55284                                                                                                                                                                                                                                                                                                                                                                    | 1.51899                                                                                                                                                                                                                                                                                  | -0.26755 | 536.3642 | 548.1147 | 561.3582 |
| C                         | 2.57342                                                                                                                                                                                                                                                                                                                                                                    | 1.03639                                                                                                                                                                                                                                                                                  | -1.10339 | 573.9991 | 581.7234 | 582.2470 |
| C                         | 1.52644                                                                                                                                                                                                                                                                                                                                                                    | 1.11662                                                                                                                                                                                                                                                                                  | 1.07431  | 592.6348 | 598.6628 | 606.1366 |
| C                         | 3.53929                                                                                                                                                                                                                                                                                                                                                                    | 0.17265                                                                                                                                                                                                                                                                                  | -0.60458 | 617.6695 | 625.3572 | 631.6324 |
| H                         | 2.59701                                                                                                                                                                                                                                                                                                                                                                    | 1.34604                                                                                                                                                                                                                                                                                  | -2.14455 | 645.6258 | 652.1660 | 678.0389 |
| C                         | 2.50452                                                                                                                                                                                                                                                                                                                                                                    | 0.24790                                                                                                                                                                                                                                                                                  | 1.56385  | 685.9998 | 697.6370 | 703.5735 |
| H                         | 0.75747                                                                                                                                                                                                                                                                                                                                                                    | 1.48483                                                                                                                                                                                                                                                                                  | 1.74416  | 708.0930 | 713.5717 | 714.8684 |
| C                         | 3.50750                                                                                                                                                                                                                                                                                                                                                                    | -0.23907                                                                                                                                                                                                                                                                                 | 0.73169  | 724.0509 | 728.9022 | 734.0772 |
| H                         | 4.32665                                                                                                                                                                                                                                                                                                                                                                    | -0.18078                                                                                                                                                                                                                                                                                 | -1.26264 | 750.4734 | 762.1082 | 767.1423 |
| H                         | 2.48615                                                                                                                                                                                                                                                                                                                                                                    | -0.03088                                                                                                                                                                                                                                                                                 | 2.61352  | 787.2726 | 797.5459 | 798.8987 |
| H                         | 4.27156                                                                                                                                                                                                                                                                                                                                                                    | -0.90311                                                                                                                                                                                                                                                                                 | 1.12010  | 804.3427 | 813.8747 | 818.6539 |
| H                         | 0.84940                                                                                                                                                                                                                                                                                                                                                                    | 3.04753                                                                                                                                                                                                                                                                                  | -1.46726 | 823.0515 | 838.8081 | 847.7541 |
| H                         | -0.31192                                                                                                                                                                                                                                                                                                                                                                   | 3.11093                                                                                                                                                                                                                                                                                  | 0.83413  | 849.2218 | 853.8247 | 857.0908 |
| Cs                        | -0.01646                                                                                                                                                                                                                                                                                                                                                                   | -1.68112                                                                                                                                                                                                                                                                                 | -0.13529 | 867.6004 | 870.9632 | 879.1056 |
| C                         | -5.04390                                                                                                                                                                                                                                                                                                                                                                   | 0.68674                                                                                                                                                                                                                                                                                  | -0.04268 | 882.0299 | 899.7088 | 902.8557 |
| C                         | -3.70087                                                                                                                                                                                                                                                                                                                                                                   | 2.84513                                                                                                                                                                                                                                                                                  | -0.02388 | 910.7943 | 912.0934 | 934.3929 |
| H                         | -2.37687                                                                                                                                                                                                                                                                                                                                                                   | 4.51148                                                                                                                                                                                                                                                                                  | -0.00260 | 935.9074 | 946.2246 | 951.0911 |

|   |          |          |          |           |           |           |
|---|----------|----------|----------|-----------|-----------|-----------|
| C | -3.70086 | -2.84511 | -0.02396 | 978.4561  | 984.3571  | 985.6458  |
| C | -5.04390 | -0.68672 | -0.04268 | 997.8774  | 1003.7938 | 1004.6704 |
| C | -1.25756 | -2.64674 | 0.00047  | 1007.4773 | 1008.1604 | 1009.5169 |
| H | -5.98116 | 1.23509  | -0.05313 | 1013.5255 | 1013.6778 | 1014.3810 |
| H | -4.60015 | 3.45511  | -0.02958 | 1021.5423 | 1024.9851 | 1066.6486 |
| C | -2.47341 | -3.43094 | -0.00962 | 1069.4176 | 1099.6252 | 1113.7446 |
| H | -4.60014 | -3.45510 | -0.02964 | 1122.1790 | 1125.6893 | 1134.1873 |
| H | -5.98117 | -1.23506 | -0.05312 | 1145.8542 | 1164.8116 | 1171.4786 |
| H | -2.37687 | -4.51149 | -0.00276 | 1175.4712 | 1178.2525 | 1180.4978 |
| N | -1.38780 | 1.30028  | -0.01186 | 1187.0011 | 1193.6947 | 1205.3873 |
| N | -1.38782 | -1.30028 | -0.01191 | 1214.2729 | 1216.2394 | 1228.3455 |
| H | 0.00022  | -0.00008 | 1.45530  | 1236.4478 | 1239.4203 | 1254.2319 |
| C | -0.00001 | 3.27742  | 0.01504  | 1255.8066 | 1265.2914 | 1266.8298 |
| H | -0.00000 | 4.36099  | 0.02340  | 1284.1310 | 1285.9466 | 1314.8589 |
| C | -0.00000 | -3.27741 | 0.01489  | 1322.5059 | 1341.3375 | 1345.0020 |
| H | 0.00001  | -4.36099 | 0.02318  | 1350.4917 | 1368.5961 | 1373.2153 |
|   |          |          |          | 1384.7541 | 1388.1277 | 1395.0697 |
|   |          |          |          | 1410.1791 | 1430.7406 | 1438.8992 |
|   |          |          |          | 1442.7105 | 1457.2110 | 1457.9115 |
|   |          |          |          | 1464.7836 | 1471.2925 | 1475.9017 |
|   |          |          |          | 1487.8993 | 1491.4244 | 1505.2633 |
|   |          |          |          | 1507.8614 | 1527.6487 | 1532.9284 |
|   |          |          |          | 1538.8790 | 1551.8113 | 1561.4546 |
|   |          |          |          | 1567.3828 | 1569.2962 | 1612.2102 |
|   |          |          |          | 1625.2911 | 1640.5060 | 1662.5695 |
|   |          |          |          | 1673.4131 | 1675.4358 | 1680.8646 |
|   |          |          |          | 1692.4898 | 1694.3851 | 1695.1019 |
|   |          |          |          | 1700.6503 | 1705.0869 | 1720.6091 |
|   |          |          |          | 3189.7891 | 3199.5842 | 3199.8026 |
|   |          |          |          | 3200.5293 | 3203.1136 | 3203.6055 |
|   |          |          |          | 3204.1358 | 3208.4232 | 3209.1153 |
|   |          |          |          | 3211.1776 | 3211.6099 | 3213.4099 |
|   |          |          |          | 3216.0550 | 3218.8709 | 3219.4942 |
|   |          |          |          | 3223.8521 | 3223.9758 | 3224.7102 |
|   |          |          |          | 3225.0661 | 3227.9376 | 3228.8998 |
|   |          |          |          | 3229.6301 | 3233.7505 | 3246.4720 |
|   |          |          |          | 3262.5058 | 3428.6663 | 3505.2292 |

### Statistical Thermodynamic Analysis

Temperature = 403.15 K

Pressure = 1 atm

Zero-point correction = 0.571107

Electronic Energy = -1956.94875510

Internal Energy (E) = -1956.3142021

Enthalpy (H) = -1956.3129251

Gibbs Free Energy (G) = -1956.4891671

Gibbs Free Energy of Solvation = -1956.56826114

| St. Pt. | General Structure | Ball & Stick model |
|---------|-------------------|--------------------|
|---------|-------------------|--------------------|

14Hyd2(spill)

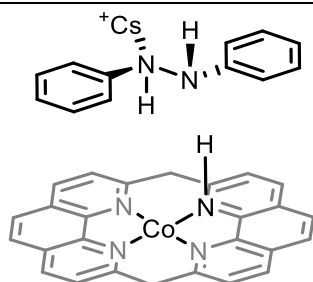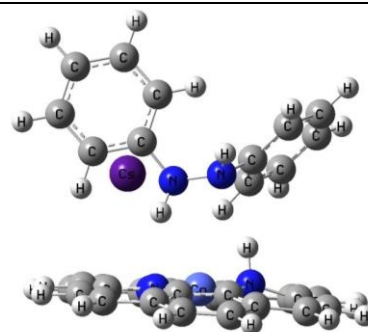

Cartesian co-ordinate

Frequencies

| Atoms | X        | Y        | Z        |           |           |           |
|-------|----------|----------|----------|-----------|-----------|-----------|
|       |          |          |          | 11.0390   | 19.6496   | 24.7503   |
|       |          |          |          | 32.3097   | 35.6816   | 42.6149   |
|       |          |          |          | 48.4134   | 52.0157   | 56.8605   |
|       |          |          |          | 70.2975   | 78.0930   | 89.2647   |
|       |          |          |          | 100.5273  | 105.4812  | 123.6460  |
|       |          |          |          | 133.2044  | 150.7662  | 160.0560  |
|       |          |          |          | 191.6208  | 207.3241  | 213.5531  |
|       |          |          |          | 229.1245  | 235.0726  | 240.2171  |
|       |          |          |          | 251.6738  | 261.0257  | 268.6947  |
|       |          |          |          | 278.0209  | 293.1823  | 306.5219  |
|       |          |          |          | 316.8388  | 339.9137  | 344.3346  |
|       |          |          |          | 367.1305  | 383.2132  | 384.9534  |
|       |          |          |          | 392.0605  | 403.9129  | 420.0248  |
|       |          |          |          | 428.3811  | 440.0567  | 443.0074  |
|       |          |          |          | 454.1561  | 467.3776  | 479.5863  |
|       |          |          |          | 481.1304  | 486.2126  | 492.8663  |
|       |          |          |          | 501.9607  | 525.9834  | 529.8888  |
|       |          |          |          | 531.8262  | 548.0775  | 564.1212  |
|       |          |          |          | 574.8792  | 581.8898  | 588.9678  |
|       |          |          |          | 591.9960  | 600.4719  | 615.8729  |
|       |          |          |          | 619.8139  | 628.3364  | 641.9121  |
|       |          |          |          | 653.5846  | 656.6585  | 676.0336  |
|       |          |          |          | 689.6192  | 704.7468  | 710.0166  |
|       |          |          |          | 712.7193  | 714.5591  | 721.6651  |
|       |          |          |          | 728.3099  | 730.2608  | 742.6527  |
|       |          |          |          | 757.9260  | 760.8051  | 772.7544  |
|       |          |          |          | 787.5428  | 794.6565  | 795.0482  |
|       |          |          |          | 802.0273  | 804.6695  | 815.9977  |
|       |          |          |          | 822.9134  | 838.4877  | 849.5618  |
|       |          |          |          | 852.7554  | 857.7926  | 867.1738  |
|       |          |          |          | 868.8964  | 874.6799  | 876.3456  |
|       |          |          |          | 877.6939  | 893.3778  | 895.1788  |
|       |          |          |          | 906.0879  | 910.6115  | 925.4785  |
|       |          |          |          | 938.8583  | 944.2143  | 948.7480  |
|       |          |          |          | 981.5683  | 984.5027  | 1000.9392 |
|       |          |          |          | 1002.5554 | 1004.0313 | 1006.8510 |
|       |          |          |          | 1010.4636 | 1011.1932 | 1011.3930 |
|       |          |          |          | 1015.3352 | 1016.8883 | 1018.8610 |
|       |          |          |          | 1024.0901 | 1027.4974 | 1064.8973 |
|       |          |          |          | 1072.4699 | 1102.3789 | 1110.1001 |
|       |          |          |          | 1124.7411 | 1127.1188 | 1133.8282 |
| N     | 0.55028  | 2.32408  | -0.82740 |           |           |           |
| N     | -0.54762 | 2.68055  | -0.05672 |           |           |           |
| C     | -1.53113 | 1.67478  | 0.03206  |           |           |           |
| C     | -2.08469 | 1.30294  | 1.26086  |           |           |           |
| C     | -1.97825 | 1.04943  | -1.14050 |           |           |           |
| C     | -3.07348 | 0.32093  | 1.31583  |           |           |           |
| H     | -1.75333 | 1.79240  | 2.17372  |           |           |           |
| C     | -2.96423 | 0.07010  | -1.07621 |           |           |           |
| H     | -1.56292 | 1.36600  | -2.09154 |           |           |           |
| C     | -3.51235 | -0.30873 | 0.15241  |           |           |           |
| H     | -3.50543 | 0.05370  | 2.27510  |           |           |           |
| H     | -3.33006 | -0.37886 | -1.99522 |           |           |           |
| H     | -4.29697 | -1.05644 | 0.19757  |           |           |           |
| C     | 1.55284  | 1.51899  | -0.26755 |           |           |           |
| C     | 2.57342  | 1.03639  | -1.10339 |           |           |           |
| C     | 1.52644  | 1.11662  | 1.07431  |           |           |           |
| C     | 3.53929  | 0.17265  | -0.60458 |           |           |           |
| H     | 2.59701  | 1.34604  | -2.14455 |           |           |           |
| C     | 2.50452  | 0.24790  | 1.56385  |           |           |           |
| H     | 0.75747  | 1.48483  | 1.74416  |           |           |           |
| C     | 3.50750  | -0.23907 | 0.73169  |           |           |           |
| H     | 4.32665  | -0.18078 | -1.26264 |           |           |           |
| H     | 2.48615  | -0.03088 | 2.61352  |           |           |           |
| H     | 4.27156  | -0.90311 | 1.12010  |           |           |           |
| H     | 0.84940  | 3.04753  | -1.46726 |           |           |           |
| H     | -0.31192 | 3.11093  | 0.83413  |           |           |           |
| Cs    | -0.01646 | -1.68112 | -0.13529 |           |           |           |
| C     | -5.04390 | 0.68674  | -0.04268 |           |           |           |
| C     | -3.70087 | 2.84513  | -0.02388 |           |           |           |
| H     | -2.37687 | 4.51148  | -0.00260 |           |           |           |
| C     | -3.70086 | -2.84511 | -0.02396 |           |           |           |
| C     | -5.04390 | -0.68672 | -0.04268 |           |           |           |
| C     | -1.25756 | -2.64674 | 0.00047  |           |           |           |
| H     | -5.98116 | 1.23509  | -0.05313 |           |           |           |
| H     | -4.60015 | 3.45511  | -0.02958 |           |           |           |
| C     | -2.47341 | -3.43094 | -0.00962 |           |           |           |
| H     | -4.60014 | -3.45510 | -0.02964 |           |           |           |

|   |          |          |          |           |           |           |
|---|----------|----------|----------|-----------|-----------|-----------|
| H | -5.98117 | -1.23506 | -0.05312 | 1144.2727 | 1168.2513 | 1178.7039 |
| H | -2.37687 | -4.51149 | -0.00276 | 1180.0943 | 1181.0997 | 1183.6158 |
| N | -1.38780 | 1.30028  | -0.01186 | 1185.0679 | 1187.0580 | 1197.4246 |
| N | -1.38782 | -1.30028 | -0.01191 | 1217.2643 | 1217.5053 | 1224.8509 |
| H | 0.00022  | -0.00008 | 1.45530  | 1236.5921 | 1239.5508 | 1252.0085 |
| C | -0.00001 | 3.27742  | 0.01504  | 1256.6815 | 1261.1876 | 1269.8041 |
| H | -0.00000 | 4.36099  | 0.02340  | 1278.9923 | 1283.8728 | 1313.0355 |
| C | -0.00000 | -3.27741 | 0.01489  | 1329.7830 | 1333.7362 | 1347.6746 |
| H | 0.00001  | -4.36099 | 0.02318  | 1352.9333 | 1362.7282 | 1370.3063 |
|   |          |          |          | 1386.6312 | 1393.1139 | 1393.8960 |
|   |          |          |          | 1415.0342 | 1435.5798 | 1440.0604 |
|   |          |          |          | 1448.9718 | 1456.8593 | 1463.3007 |
|   |          |          |          | 1471.3543 | 1475.1060 | 1476.5896 |
|   |          |          |          | 1488.1125 | 1491.5306 | 1494.9131 |
|   |          |          |          | 1506.2278 | 1528.4599 | 1543.2677 |
|   |          |          |          | 1548.4753 | 1556.3763 | 1564.2091 |
|   |          |          |          | 1565.9965 | 1568.7831 | 1601.5529 |
|   |          |          |          | 1629.4583 | 1633.4354 | 1662.6025 |
|   |          |          |          | 1675.1817 | 1678.9039 | 1688.5748 |
|   |          |          |          | 1690.9207 | 1692.8119 | 1695.7103 |
|   |          |          |          | 1700.5250 | 1702.9854 | 1723.9349 |
|   |          |          |          | 3193.5642 | 3195.4182 | 3197.5898 |
|   |          |          |          | 3199.2220 | 3199.7996 | 3201.6259 |
|   |          |          |          | 3206.3580 | 3207.2385 | 3207.2989 |
|   |          |          |          | 3209.1509 | 3211.7060 | 3214.6802 |
|   |          |          |          | 3214.9903 | 3217.0575 | 3222.6541 |
|   |          |          |          | 3223.6763 | 3225.1851 | 3225.7535 |
|   |          |          |          | 3226.5046 | 3229.1557 | 3230.7164 |
|   |          |          |          | 3233.0640 | 3236.6421 | 3241.6673 |
|   |          |          |          | 3252.1437 | 3493.0666 | 3544.1576 |

### Statistical Thermodynamic Analysis

Temperature = 403.15 K

Pressure = 1 atm

Zero-point correction = 0.571634

Electronic Energy = -1956.96259833

Internal Energy (E) = -1956.32758033

Enthalpy (H) = -1956.32630333

Gibbs Free Energy (G) = -1956.50130633

Gibbs Free Energy of Solvation = -1956.57019094

| St. Pt.                    | General Structure | Ball & Stick model |
|----------------------------|-------------------|--------------------|
| TS2 <sup>Hyd2(spill)</sup> |                   |                    |



| Cartesian co-ordinate |          |          |          | Frequencies |           |           |
|-----------------------|----------|----------|----------|-------------|-----------|-----------|
| Atoms                 | X        | Y        | Z        |             |           |           |
|                       |          |          |          | -521.5742   | 6.9572    | 15.8399   |
|                       |          |          |          | 21.8779     | 25.0691   | 35.0751   |
|                       |          |          |          | 41.6904     | 51.6869   | 53.3731   |
|                       |          |          |          | 56.3514     | 71.7063   | 76.1304   |
|                       |          |          |          | 89.3282     | 104.2173  | 113.5133  |
| N                     | 0.55028  | 2.32408  | -0.82740 | 134.7975    | 145.6647  | 164.2075  |
| N                     | -0.54762 | 2.68055  | -0.05672 | 169.8271    | 188.4342  | 203.3284  |
| C                     | -1.53113 | 1.67478  | 0.03206  | 220.3709    | 238.0387  | 243.6405  |
| C                     | -2.08469 | 1.30294  | 1.26086  | 252.4587    | 260.5104  | 267.2497  |
| C                     | -1.97825 | 1.04943  | -1.14050 | 272.3570    | 280.4543  | 317.1553  |
| C                     | -3.07348 | 0.32093  | 1.31583  | 329.8996    | 344.1044  | 349.5949  |
| H                     | -1.75333 | 1.79240  | 2.17372  | 367.1101    | 378.4029  | 392.0123  |
| C                     | -2.96423 | 0.07010  | -1.07621 | 403.3103    | 407.3107  | 419.2379  |
| H                     | -1.56292 | 1.36600  | -2.09154 | 426.2138    | 431.7683  | 444.1693  |
| C                     | -3.51235 | -0.30873 | 0.15241  | 460.0713    | 464.2250  | 470.9343  |
| H                     | -3.50543 | 0.05370  | 2.27510  | 482.0847    | 483.6392  | 488.6139  |
| H                     | -3.33006 | -0.37886 | -1.99522 | 493.4237    | 505.1669  | 531.2609  |
| H                     | -4.29697 | -1.05644 | 0.19757  | 533.8198    | 552.2673  | 565.9872  |
| C                     | 1.55284  | 1.51899  | -0.26755 | 582.0881    | 586.0063  | 593.6576  |
| C                     | 2.57342  | 1.03639  | -1.10339 | 598.0129    | 601.9426  | 612.8399  |
| C                     | 1.52644  | 1.11662  | 1.07431  | 624.2772    | 625.5835  | 631.2594  |
| C                     | 3.53929  | 0.17265  | -0.60458 | 667.4421    | 674.6516  | 682.3378  |
| H                     | 2.59701  | 1.34604  | -2.14455 | 699.7561    | 708.3210  | 711.6498  |
| C                     | 2.50452  | 0.24790  | 1.56385  | 719.9792    | 720.3905  | 723.2848  |
| H                     | 0.75747  | 1.48483  | 1.74416  | 732.8866    | 746.3848  | 749.8539  |
| C                     | 3.50750  | -0.23907 | 0.73169  | 761.8766    | 768.0088  | 772.1889  |
| H                     | 4.32665  | -0.18078 | -1.26264 | 785.7706    | 793.0245  | 805.6782  |
| H                     | 2.48615  | -0.03088 | 2.61352  | 814.6882    | 818.6566  | 822.6985  |
| H                     | 4.27156  | -0.90311 | 1.12010  | 829.0380    | 850.4273  | 855.7216  |
| H                     | 0.84940  | 3.04753  | -1.46726 | 857.2064    | 862.1532  | 865.2642  |
| H                     | -0.31192 | 3.11093  | 0.83413  | 868.1369    | 872.2348  | 872.9255  |
| Cs                    | -0.01646 | -1.68112 | -0.13529 | 880.7703    | 904.7179  | 915.2897  |
| C                     | -5.04390 | 0.68674  | -0.04268 | 933.1714    | 941.8665  | 943.8295  |
| C                     | -3.70087 | 2.84513  | -0.02388 | 948.5300    | 975.0282  | 977.0739  |
| H                     | -2.37687 | 4.51148  | -0.00260 | 982.2802    | 999.0420  | 1003.9854 |
| C                     | -3.70086 | -2.84511 | -0.02396 | 1009.8483   | 1010.3634 | 1010.7860 |
| C                     | -5.04390 | -0.68672 | -0.04268 | 1015.2394   | 1015.4974 | 1016.3681 |
| C                     | -1.25756 | -2.64674 | 0.00047  | 1022.0660   | 1022.4685 | 1031.9327 |
| H                     | -5.98116 | 1.23509  | -0.05313 | 1032.7866   | 1052.7482 | 1065.8473 |
| H                     | -4.60015 | 3.45511  | -0.02958 | 1069.1689   | 1108.4692 | 1109.7416 |
| C                     | -2.47341 | -3.43094 | -0.00962 | 1120.0210   | 1131.0593 | 1137.3402 |
| H                     | -4.60014 | -3.45510 | -0.02964 | 1147.0481   | 1155.6604 | 1167.9427 |
| H                     | -5.98117 | -1.23506 | -0.05312 | 1175.9923   | 1180.2775 | 1182.5919 |
| H                     | -2.37687 | -4.51149 | -0.00276 | 1183.4589   | 1186.8902 | 1199.7546 |
| N                     | -1.38780 | 1.30028  | -0.01186 | 1204.0973   | 1219.2777 | 1228.3658 |
| N                     | -1.38782 | -1.30028 | -0.01191 | 1237.8934   | 1241.5382 | 1249.6116 |
| H                     | 0.00022  | -0.00008 | 1.45530  | 1253.6720   | 1255.6223 | 1262.4720 |
| C                     | -0.00001 | 3.27742  | 0.01504  | 1280.7828   | 1285.1947 | 1292.9745 |
| H                     | -0.00000 | 4.36099  | 0.02340  | 1314.5633   | 1332.6690 | 1348.6669 |
| C                     | -0.00000 | -3.27741 | 0.01489  | 1362.7599   | 1366.7351 | 1370.2386 |
| H                     | 0.00001  | -4.36099 | 0.02318  | 1387.4278   | 1402.6399 | 1407.9889 |
|                       |          |          |          | 1421.0048   | 1441.7298 | 1445.3363 |
|                       |          |          |          | 1449.0162   | 1458.8382 | 1460.8998 |

|  |           |           |           |
|--|-----------|-----------|-----------|
|  | 1471.9560 | 1472.9251 | 1473.8692 |
|  | 1476.7104 | 1497.2228 | 1503.5949 |
|  | 1512.4743 | 1521.5930 | 1531.2060 |
|  | 1550.2630 | 1550.8419 | 1558.9574 |
|  | 1566.0750 | 1578.0952 | 1586.6307 |
|  | 1613.9337 | 1625.6643 | 1644.5379 |
|  | 1657.8162 | 1671.5008 | 1688.9244 |
|  | 1689.4881 | 1696.2961 | 1697.6645 |
|  | 1698.9574 | 1701.6440 | 1704.6967 |
|  | 1712.8829 | 3198.3008 | 3199.3980 |
|  | 3200.5882 | 3203.0750 | 3203.5571 |
|  | 3204.1974 | 3204.3035 | 3207.2945 |
|  | 3208.0512 | 3210.0275 | 3211.2376 |
|  | 3217.6278 | 3218.6829 | 3219.5767 |
|  | 3219.6679 | 3220.6792 | 3223.4373 |
|  | 3226.5939 | 3227.4881 | 3229.2103 |
|  | 3230.1786 | 3234.5898 | 3237.6524 |
|  | 3241.3235 | 3319.1730 | 3425.5781 |

### Statistical Thermodynamic Analysis

Temperature = 403.15 K

Pressure = 1 atm

Zero-point correction = 0.567859

Electronic Energy = -1956.94564937

Internal Energy (E) = -1956.31551037

Enthalpy (H) = -1956.31423337

Gibbs Free Energy (G) = -1956.48807637

Gibbs Free Energy of Solvation = -1956.5656291

| St. Pt.                     | General Structure | Ball & Stick model |          |          |          |          |
|-----------------------------|-------------------|--------------------|----------|----------|----------|----------|
| 15 <sup>Hyd2(spill)</sup>   |                   |                    |          |          |          |          |
| <b>Cartesian coordinate</b> |                   | <b>Frequencies</b> |          |          |          |          |
| -----                       |                   |                    |          |          |          |          |
| <b>Atoms</b>                | <b>X</b>          | <b>Y</b>           | <b>Z</b> |          |          |          |
| -----                       |                   |                    |          |          |          |          |
| N                           | 0.55028           | 2.32408            | -0.82740 | 14.3941  | 25.3150  | 30.1505  |
| N                           | -0.54762          | 2.68055            | -0.05672 | 36.1624  | 39.8454  | 46.0883  |
| C                           | -1.53113          | 1.67478            | 0.03206  | 49.9528  | 54.0599  | 59.7365  |
| C                           | -2.08469          | 1.30294            | 1.26086  | 73.3754  | 82.9318  | 91.7929  |
| C                           | -1.97825          | 1.04943            | -1.14050 | 99.3336  | 117.9722 | 133.6674 |
| C                           | -3.07348          | 0.32093            | 1.31583  | 137.9004 | 151.8804 | 169.2410 |
| H                           | -1.75333          | 1.79240            | 2.17372  | 172.5749 | 184.5108 | 224.9342 |
|                             |                   |                    |          | 239.0055 | 246.5543 | 254.7092 |
|                             |                   |                    |          | 258.1793 | 260.4951 | 264.6600 |
|                             |                   |                    |          | 275.7222 | 308.5673 | 335.8759 |
|                             |                   |                    |          | 342.9830 | 352.5257 | 355.3010 |

|    |          |          |          |           |           |           |
|----|----------|----------|----------|-----------|-----------|-----------|
| C  | -2.96423 | 0.07010  | -1.07621 | 375.0528  | 393.7565  | 403.1196  |
| H  | -1.56292 | 1.36600  | -2.09154 | 406.9792  | 421.4396  | 429.4991  |
| C  | -3.51235 | -0.30873 | 0.15241  | 437.3845  | 444.9823  | 448.4670  |
| H  | -3.50543 | 0.05370  | 2.27510  | 453.7477  | 463.5450  | 473.7246  |
| H  | -3.33006 | -0.37886 | -1.99522 | 483.3871  | 486.9206  | 489.0528  |
| H  | -4.29697 | -1.05644 | 0.19757  | 492.8789  | 494.3479  | 525.2817  |
| C  | 1.55284  | 1.51899  | -0.26755 | 534.2464  | 555.3082  | 582.5154  |
| C  | 2.57342  | 1.03639  | -1.10339 | 586.8430  | 589.2463  | 595.0754  |
| C  | 1.52644  | 1.11662  | 1.07431  | 595.6132  | 601.0816  | 620.2104  |
| C  | 3.53929  | 0.17265  | -0.60458 | 626.6832  | 630.8281  | 634.5010  |
| H  | 2.59701  | 1.34604  | -2.14455 | 673.2373  | 682.3906  | 693.4325  |
| C  | 2.50452  | 0.24790  | 1.56385  | 710.6365  | 711.9258  | 719.0315  |
| H  | 0.75747  | 1.48483  | 1.74416  | 722.7954  | 724.3191  | 732.5950  |
| C  | 3.50750  | -0.23907 | 0.73169  | 741.1068  | 746.7453  | 753.4188  |
| H  | 4.32665  | -0.18078 | -1.26264 | 760.4912  | 764.8199  | 774.7375  |
| H  | 2.48615  | -0.03088 | 2.61352  | 800.9097  | 809.4837  | 812.7531  |
| H  | 4.27156  | -0.90311 | 1.12010  | 815.7835  | 820.6774  | 823.4264  |
| H  | 0.84940  | 3.04753  | -1.46726 | 834.3797  | 855.1654  | 856.3242  |
| H  | -0.31192 | 3.11093  | 0.83413  | 861.5314  | 862.6259  | 871.6375  |
| Cs | -0.01646 | -1.68112 | -0.13529 | 873.2647  | 877.8254  | 884.0055  |
| C  | -5.04390 | 0.68674  | -0.04268 | 901.4054  | 916.0860  | 935.5637  |
| C  | -3.70087 | 2.84513  | -0.02388 | 946.5121  | 951.3370  | 960.6296  |
| H  | -2.37687 | 4.51148  | -0.00260 | 979.7332  | 983.6351  | 986.2196  |
| C  | -3.70086 | -2.84511 | -0.02396 | 1007.8530 | 1008.6242 | 1009.6116 |
| C  | -5.04390 | -0.68672 | -0.04268 | 1010.8143 | 1011.1762 | 1013.8770 |
| C  | -1.25756 | -2.64674 | 0.00047  | 1015.4294 | 1021.3052 | 1021.7372 |
| H  | -5.98116 | 1.23509  | -0.05313 | 1022.6257 | 1025.0163 | 1041.0400 |
| H  | -4.60015 | 3.45511  | -0.02958 | 1042.2312 | 1066.1628 | 1070.6182 |
| C  | -2.47341 | -3.43094 | -0.00962 | 1096.3733 | 1113.9919 | 1126.0304 |
| H  | -4.60014 | -3.45510 | -0.02964 | 1129.0491 | 1135.0864 | 1139.3846 |
| H  | -5.98117 | -1.23506 | -0.05312 | 1150.3833 | 1168.4421 | 1174.7735 |
| H  | -2.37687 | -4.51149 | -0.00276 | 1181.5116 | 1186.7836 | 1190.3115 |
| N  | -1.38780 | 1.30028  | -0.01186 | 1196.6443 | 1206.3546 | 1209.4944 |
| N  | -1.38782 | -1.30028 | -0.01191 | 1220.3806 | 1226.8000 | 1237.2974 |
| H  | 0.00022  | -0.00008 | 1.45530  | 1240.1621 | 1244.0689 | 1251.2518 |
| C  | -0.00001 | 3.27742  | 0.01504  | 1254.2457 | 1256.5976 | 1260.1687 |
| H  | -0.00000 | 4.36099  | 0.02340  | 1283.0438 | 1292.5425 | 1318.1080 |
| C  | -0.00000 | -3.27741 | 0.01489  | 1321.6931 | 1346.6502 | 1365.7071 |
| H  | 0.00001  | -4.36099 | 0.02318  | 1367.1730 | 1373.5572 | 1384.8262 |
|    |          |          |          | 1394.2692 | 1402.1006 | 1406.1415 |
|    |          |          |          | 1416.5308 | 1432.8966 | 1446.7022 |
|    |          |          |          | 1449.7229 | 1463.6993 | 1465.3540 |
|    |          |          |          | 1471.5687 | 1475.4105 | 1479.8034 |
|    |          |          |          | 1484.6877 | 1499.8922 | 1506.6132 |
|    |          |          |          | 1520.7168 | 1523.7273 | 1540.8297 |
|    |          |          |          | 1544.6206 | 1556.1383 | 1560.3293 |
|    |          |          |          | 1561.2346 | 1569.4585 | 1591.1332 |
|    |          |          |          | 1611.5319 | 1623.1472 | 1646.0762 |
|    |          |          |          | 1672.6432 | 1690.2342 | 1690.5569 |
|    |          |          |          | 1691.5573 | 1698.3341 | 1698.7386 |
|    |          |          |          | 1700.1200 | 1704.4423 | 1711.8319 |
|    |          |          |          | 2304.4671 | 3193.3421 | 3195.8938 |
|    |          |          |          | 3197.1619 | 3198.8327 | 3199.4056 |
|    |          |          |          | 3201.4901 | 3202.1825 | 3208.2985 |
|    |          |          |          | 3210.7479 | 3215.1197 | 3216.7403 |

|  |           |           |           |
|--|-----------|-----------|-----------|
|  | 3219.8089 | 3219.8189 | 3220.8478 |
|  | 3223.0703 | 3226.1528 | 3228.7050 |
|  | 3232.9609 | 3233.1917 | 3233.2773 |
|  | 3236.9179 | 3242.7236 | 3243.5109 |
|  | 3247.2419 | 3253.6842 | 3422.1388 |

### Statistical Thermodynamic Analysis

Temperature = 403.15 K

Pressure = 1 atm

Zero-point correction = 0.571971

Electronic Energy = -1956.95641784

Internal Energy (E) = -1956.32193784

Enthalpy (H) = -1956.32066184

Gibbs Free Energy (G) = -1956.49249984

Gibbs Free Energy of Solvation = -1956.56778224

| St. Pt.                     | General Structure | Ball & Stick model |          |           |          |          |
|-----------------------------|-------------------|--------------------|----------|-----------|----------|----------|
| TS3 <sup>Hyd2(spill)</sup>  |                   |                    |          |           |          |          |
| <b>Cartesian coordinate</b> |                   | <b>Frequencies</b> |          |           |          |          |
| -----                       |                   |                    |          |           |          |          |
| <b>Atoms</b>                | <b>X</b>          | <b>Y</b>           | <b>Z</b> | -493.8226 | 13.9739  | 20.4283  |
|                             |                   |                    |          | 27.0399   | 34.9271  | 38.7580  |
|                             |                   |                    |          | 46.1595   | 50.9769  | 55.1533  |
|                             |                   |                    |          | 65.0698   | 67.4656  | 81.6345  |
|                             |                   |                    |          | 85.7556   | 94.6111  | 104.7548 |
| N                           | 0.55028           | 2.32408            | -0.82740 | 118.9777  | 127.6591 | 135.7616 |
| N                           | -0.54762          | 2.68055            | -0.05672 | 156.0796  | 166.2179 | 177.6264 |
| C                           | -1.53113          | 1.67478            | 0.03206  | 218.7053  | 239.2085 | 241.4438 |
| C                           | -2.08469          | 1.30294            | 1.26086  | 250.1069  | 258.4180 | 262.5340 |
| C                           | -1.97825          | 1.04943            | -1.14050 | 267.5497  | 277.5436 | 308.1484 |
| C                           | -3.07348          | 0.32093            | 1.31583  | 313.4141  | 334.6703 | 343.1422 |
| H                           | -1.75333          | 1.79240            | 2.17372  | 352.6426  | 374.7836 | 388.1524 |
| C                           | -2.96423          | 0.07010            | -1.07621 | 399.7888  | 403.5494 | 406.3234 |
| H                           | -1.56292          | 1.36600            | -2.09154 | 418.4559  | 425.2720 | 433.2347 |
| C                           | -3.51235          | -0.30873           | 0.15241  | 443.9396  | 455.7512 | 462.4733 |
| H                           | -3.50543          | 0.05370            | 2.27510  | 472.3659  | 483.5813 | 484.1859 |
| H                           | -3.33006          | -0.37886           | -1.99522 | 490.2987  | 493.7938 | 517.9003 |
| H                           | -4.29697          | -1.05644           | 0.19757  | 529.2314  | 534.0022 | 545.2107 |
| C                           | 1.55284           | 1.51899            | -0.26755 | 550.1260  | 555.9402 | 581.7444 |
| C                           | 2.57342           | 1.03639            | -1.10339 | 587.0379  | 594.0941 | 596.7006 |
| C                           | 1.52644           | 1.11662            | 1.07431  | 599.6862  | 625.8952 | 627.5615 |
| C                           | 3.53929           | 0.17265            | -0.60458 | 628.5635  | 673.8673 | 683.4974 |
| H                           | 2.59701           | 1.34604            | -2.14455 | 689.7228  | 703.3136 | 708.3466 |
| C                           | 2.50452           | 0.24790            | 1.56385  | 710.2431  | 713.2385 | 721.9428 |
| H                           | 0.75747           | 1.48483            | 1.74416  | 728.8755  | 731.6604 | 739.0338 |
| C                           | 3.50750           | -0.23907           | 0.73169  |           |          |          |

|    |          |          |          |           |           |           |
|----|----------|----------|----------|-----------|-----------|-----------|
| H  | 4.32665  | -0.18078 | -1.26264 | 745.0388  | 749.5377  | 762.6784  |
| H  | 2.48615  | -0.03088 | 2.61352  | 764.4740  | 784.8867  | 801.7526  |
| H  | 4.27156  | -0.90311 | 1.12010  | 802.0881  | 809.8432  | 815.2906  |
| H  | 0.84940  | 3.04753  | -1.46726 | 825.4336  | 826.2920  | 852.4699  |
| H  | -0.31192 | 3.11093  | 0.83413  | 856.9517  | 857.5489  | 860.8547  |
| Cs | -0.01646 | -1.68112 | -0.13529 | 861.5459  | 865.3613  | 870.1509  |
| C  | -5.04390 | 0.68674  | -0.04268 | 872.8785  | 876.7665  | 903.2671  |
| C  | -3.70087 | 2.84513  | -0.02388 | 917.0776  | 936.2339  | 936.8370  |
| H  | -2.37687 | 4.51148  | -0.00260 | 946.1412  | 954.4257  | 964.4890  |
| C  | -3.70086 | -2.84511 | -0.02396 | 976.8506  | 981.2057  | 1002.8892 |
| C  | -5.04390 | -0.68672 | -0.04268 | 1005.1158 | 1009.6630 | 1011.2087 |
| C  | -1.25756 | -2.64674 | 0.00047  | 1011.8380 | 1013.7933 | 1013.9105 |
| H  | -5.98116 | 1.23509  | -0.05313 | 1015.2204 | 1015.5629 | 1027.8577 |
| H  | -4.60015 | 3.45511  | -0.02958 | 1030.2869 | 1034.0715 | 1037.9181 |
| C  | -2.47341 | -3.43094 | -0.00962 | 1062.5384 | 1068.3562 | 1101.1405 |
| H  | -4.60014 | -3.45510 | -0.02964 | 1111.7399 | 1116.5534 | 1133.2232 |
| H  | -5.98117 | -1.23506 | -0.05312 | 1136.0924 | 1146.9563 | 1151.3583 |
| H  | -2.37687 | -4.51149 | -0.00276 | 1164.6674 | 1165.9325 | 1173.8184 |
| N  | -1.38780 | 1.30028  | -0.01186 | 1178.4860 | 1181.2778 | 1186.7361 |
| N  | -1.38782 | -1.30028 | -0.01191 | 1192.1826 | 1194.1072 | 1212.8669 |
| H  | 0.00022  | -0.00008 | 1.45530  | 1222.7910 | 1233.8117 | 1236.3835 |
| C  | -0.00001 | 3.27742  | 0.01504  | 1238.7278 | 1253.6131 | 1254.3283 |
| H  | -0.00000 | 4.36099  | 0.02340  | 1263.4167 | 1265.6388 | 1287.7800 |
| C  | -0.00000 | -3.27741 | 0.01489  | 1295.2065 | 1296.1800 | 1316.6912 |
| H  | 0.00001  | -4.36099 | 0.02318  | 1352.4530 | 1371.0798 | 1373.9262 |
|    |          |          |          | 1375.5327 | 1383.1637 | 1392.1853 |
|    |          |          |          | 1400.3918 | 1406.7224 | 1412.1561 |
|    |          |          |          | 1444.3492 | 1455.3032 | 1463.0829 |
|    |          |          |          | 1466.0476 | 1468.6037 | 1477.2424 |
|    |          |          |          | 1479.2062 | 1483.0733 | 1508.0620 |
|    |          |          |          | 1511.6254 | 1515.3790 | 1527.4221 |
|    |          |          |          | 1532.8506 | 1549.0701 | 1554.0246 |
|    |          |          |          | 1560.3645 | 1566.5564 | 1611.4771 |
|    |          |          |          | 1624.0408 | 1626.6135 | 1643.5188 |
|    |          |          |          | 1660.4201 | 1668.9661 | 1679.4149 |
|    |          |          |          | 1685.6739 | 1688.2198 | 1689.9346 |
|    |          |          |          | 1693.1831 | 1699.0434 | 1709.5219 |
|    |          |          |          | 3181.1238 | 3198.1482 | 3201.7401 |
|    |          |          |          | 3202.0912 | 3202.2995 | 3205.1334 |
|    |          |          |          | 3206.3495 | 3208.7972 | 3208.9940 |
|    |          |          |          | 3209.3004 | 3219.8499 | 3220.0355 |
|    |          |          |          | 3221.2509 | 3222.6133 | 3222.8731 |
|    |          |          |          | 3222.9702 | 3223.1977 | 3225.8376 |
|    |          |          |          | 3227.2591 | 3229.4454 | 3232.5673 |
|    |          |          |          | 3233.8256 | 3244.9964 | 3249.2941 |
|    |          |          |          | 3455.4315 | 3504.4028 | 3588.5354 |

### Statistical Thermodynamic Analysis

Temperature = 403.15 K

Pressure = 1 atm

Zero-point correction = 0.569037

Electronic Energy = -1956.91293610

Internal Energy (E) = -1956.2806831

Enthalpy (H) = -1956.2794061

Gibbs Free Energy (G) = -1956.4534831

Gibbs Free Energy of Solvation = -1956.53316457

| St. Pt.                     | General Structure | Ball & Stick model |          |           |
|-----------------------------|-------------------|--------------------|----------|-----------|
| 16Hyd2(spill)               |                   |                    |          |           |
| <b>Cartesian coordinate</b> |                   | <b>Frequencies</b> |          |           |
| -----                       |                   |                    |          |           |
| <b>Atoms</b>                | <b>X</b>          | <b>Y</b>           | <b>Z</b> |           |
| -----                       |                   |                    |          |           |
| N                           | 0.55028           | 2.32408            | -0.82740 | 21.4817   |
| N                           | -0.54762          | 2.68055            | -0.05672 | 33.1548   |
| C                           | -1.53113          | 1.67478            | 0.03206  | 37.5246   |
| C                           | -2.08469          | 1.30294            | 1.26086  | 43.7033   |
| C                           | -1.97825          | 1.04943            | -1.14050 | 47.4649   |
| C                           | -3.07348          | 0.32093            | 1.31583  | 59.1612   |
| H                           | -1.75333          | 1.79240            | 2.17372  | 65.0853   |
| C                           | -2.96423          | 0.07010            | -1.07621 | 75.1878   |
| H                           | -1.56292          | 1.36600            | -2.09154 | 88.5364   |
| C                           | -3.51235          | -0.30873           | 0.15241  | 92.9647   |
| H                           | -3.50543          | 0.05370            | 2.27510  | 98.9162   |
| H                           | -3.33006          | -0.37886           | -1.99522 | 108.5485  |
| H                           | -4.29697          | -1.05644           | 0.19757  | 115.2970  |
| C                           | 1.55284           | 1.51899            | -0.26755 | 136.0705  |
| C                           | 2.57342           | 1.03639            | -1.10339 | 143.0991  |
| C                           | 1.52644           | 1.11662            | 1.07431  | 168.3507  |
| C                           | 3.53929           | 0.17265            | -0.60458 | 175.7162  |
| H                           | 2.59701           | 1.34604            | -2.14455 | 203.5515  |
| C                           | 2.50452           | 0.24790            | 1.56385  | 219.4539  |
| H                           | 0.75747           | 1.48483            | 1.74416  | 228.8327  |
| C                           | 3.50750           | -0.23907           | 0.73169  | 246.7953  |
| H                           | 4.32665           | -0.18078           | -1.26264 | 251.7288  |
| H                           | 2.48615           | -0.03088           | 2.61352  | 258.7280  |
| H                           | 4.27156           | -0.90311           | 1.12010  | 275.7885  |
| H                           | 0.84940           | 3.04753            | -1.46726 | 281.1627  |
| H                           | -0.31192          | 3.11093            | 0.83413  | 282.5955  |
| Cs                          | -0.01646          | -1.68112           | -0.13529 | 342.6130  |
| C                           | -5.04390          | 0.68674            | -0.04268 | 351.2272  |
| C                           | -3.70087          | 2.84513            | -0.02388 | 355.2272  |
| H                           | -2.37687          | 4.51148            | -0.00260 | 358.2272  |
| C                           | -3.70086          | -2.84511           | -0.02396 | 382.4032  |
| C                           | -5.04390          | -0.68672           | -0.04268 | 387.0311  |
| C                           | -1.25756          | -2.64674           | 0.00047  | 406.7792  |
|                             |                   |                    |          | 406.9176  |
|                             |                   |                    |          | 410.1711  |
|                             |                   |                    |          | 423.7099  |
|                             |                   |                    |          | 429.5880  |
|                             |                   |                    |          | 441.1361  |
|                             |                   |                    |          | 448.7835  |
|                             |                   |                    |          | 461.7893  |
|                             |                   |                    |          | 468.2209  |
|                             |                   |                    |          | 478.2275  |
|                             |                   |                    |          | 481.2236  |
|                             |                   |                    |          | 486.5736  |
|                             |                   |                    |          | 493.6796  |
|                             |                   |                    |          | 496.3018  |
|                             |                   |                    |          | 501.9359  |
|                             |                   |                    |          | 522.2865  |
|                             |                   |                    |          | 538.4215  |
|                             |                   |                    |          | 539.2928  |
|                             |                   |                    |          | 556.6308  |
|                             |                   |                    |          | 571.4623  |
|                             |                   |                    |          | 585.7081  |
|                             |                   |                    |          | 586.0794  |
|                             |                   |                    |          | 595.3750  |
|                             |                   |                    |          | 598.2573  |
|                             |                   |                    |          | 602.8254  |
|                             |                   |                    |          | 606.2142  |
|                             |                   |                    |          | 626.9769  |
|                             |                   |                    |          | 631.1232  |
|                             |                   |                    |          | 633.0281  |
|                             |                   |                    |          | 677.9675  |
|                             |                   |                    |          | 681.6837  |
|                             |                   |                    |          | 687.2931  |
|                             |                   |                    |          | 687.9392  |
|                             |                   |                    |          | 712.2890  |
|                             |                   |                    |          | 713.0354  |
|                             |                   |                    |          | 715.8215  |
|                             |                   |                    |          | 720.0083  |
|                             |                   |                    |          | 721.5013  |
|                             |                   |                    |          | 741.7975  |
|                             |                   |                    |          | 746.2813  |
|                             |                   |                    |          | 755.2784  |
|                             |                   |                    |          | 766.4781  |
|                             |                   |                    |          | 767.8519  |
|                             |                   |                    |          | 776.0517  |
|                             |                   |                    |          | 791.7818  |
|                             |                   |                    |          | 796.9987  |
|                             |                   |                    |          | 810.2814  |
|                             |                   |                    |          | 820.9921  |
|                             |                   |                    |          | 823.2026  |
|                             |                   |                    |          | 837.7258  |
|                             |                   |                    |          | 845.7619  |
|                             |                   |                    |          | 854.1803  |
|                             |                   |                    |          | 858.1584  |
|                             |                   |                    |          | 860.3441  |
|                             |                   |                    |          | 860.4975  |
|                             |                   |                    |          | 861.8218  |
|                             |                   |                    |          | 864.9033  |
|                             |                   |                    |          | 872.2203  |
|                             |                   |                    |          | 881.6402  |
|                             |                   |                    |          | 887.6316  |
|                             |                   |                    |          | 907.4864  |
|                             |                   |                    |          | 913.6455  |
|                             |                   |                    |          | 920.5858  |
|                             |                   |                    |          | 934.7347  |
|                             |                   |                    |          | 941.3663  |
|                             |                   |                    |          | 949.3013  |
|                             |                   |                    |          | 983.5028  |
|                             |                   |                    |          | 985.9424  |
|                             |                   |                    |          | 989.0292  |
|                             |                   |                    |          | 993.1726  |
|                             |                   |                    |          | 995.4765  |
|                             |                   |                    |          | 1008.6959 |
|                             |                   |                    |          | 1009.3772 |
|                             |                   |                    |          | 1010.3071 |
|                             |                   |                    |          | 1016.1688 |

|   |          |          |          |           |           |           |
|---|----------|----------|----------|-----------|-----------|-----------|
| H | -5.98116 | 1.23509  | -0.05313 | 1016.5862 | 1017.8391 | 1018.0739 |
| H | -4.60015 | 3.45511  | -0.02958 | 1026.4657 | 1027.7648 | 1042.8703 |
| C | -2.47341 | -3.43094 | -0.00962 | 1065.6499 | 1073.4950 | 1084.7679 |
| H | -4.60014 | -3.45510 | -0.02964 | 1118.3177 | 1123.8052 | 1138.3146 |
| H | -5.98117 | -1.23506 | -0.05312 | 1145.4151 | 1145.7754 | 1158.2144 |
| H | -2.37687 | -4.51149 | -0.00276 | 1171.6509 | 1177.3056 | 1184.1070 |
| N | -1.38780 | 1.30028  | -0.01186 | 1186.0634 | 1186.9467 | 1191.4529 |
| N | -1.38782 | -1.30028 | -0.01191 | 1206.1265 | 1206.4957 | 1233.7857 |
| H | 0.00022  | -0.00008 | 1.45530  | 1240.6502 | 1244.7761 | 1247.7488 |
| C | -0.00001 | 3.27742  | 0.01504  | 1259.0632 | 1259.3035 | 1277.2882 |
| H | -0.00000 | 4.36099  | 0.02340  | 1280.8882 | 1295.9817 | 1301.8855 |
| C | -0.00000 | -3.27741 | 0.01489  | 1304.4375 | 1329.5091 | 1331.2102 |
| H | 0.00001  | -4.36099 | 0.02318  | 1364.2514 | 1364.8538 | 1366.4541 |
|   |          |          |          | 1386.6041 | 1396.2646 | 1411.1359 |
|   |          |          |          | 1418.7671 | 1423.9504 | 1434.6000 |
|   |          |          |          | 1453.3126 | 1459.7405 | 1463.9713 |
|   |          |          |          | 1471.5745 | 1476.6871 | 1481.5149 |
|   |          |          |          | 1481.8660 | 1487.7211 | 1518.3662 |
|   |          |          |          | 1521.0887 | 1524.9542 | 1530.5759 |
|   |          |          |          | 1549.0499 | 1556.7023 | 1566.7891 |
|   |          |          |          | 1569.8606 | 1575.5975 | 1623.0031 |
|   |          |          |          | 1634.5942 | 1650.4487 | 1655.7574 |
|   |          |          |          | 1670.5494 | 1672.3030 | 1678.8514 |
|   |          |          |          | 1692.9148 | 1695.1829 | 1698.5844 |
|   |          |          |          | 1703.5428 | 1707.1605 | 1715.9607 |
|   |          |          |          | 3183.9134 | 3193.8151 | 3200.9790 |
|   |          |          |          | 3201.9319 | 3205.9300 | 3209.3131 |
|   |          |          |          | 3213.0732 | 3217.3374 | 3217.3983 |
|   |          |          |          | 3217.6417 | 3221.1259 | 3221.7303 |
|   |          |          |          | 3223.6103 | 3223.9707 | 3224.3703 |
|   |          |          |          | 3226.4241 | 3231.8094 | 3232.2541 |
|   |          |          |          | 3232.3320 | 3233.4398 | 3234.0894 |
|   |          |          |          | 3244.0441 | 3247.9332 | 3252.6922 |
|   |          |          |          | 3458.1419 | 3570.2029 | 3677.7904 |

### Statistical Thermodynamic Analysis

Temperature = 403.15 K

Pressure = 1 atm

Zero-point correction = 0.571991

Electronic Energy = -1957.03005497

Internal Energy (E) = -1956.39467097

Enthalpy (H) = -1956.39339397

Gibbs Free Energy (G) = -1956.56427697

Gibbs Free Energy of Solvation = -1956.63011925

| St. Pt.                     | General Structure                                                                 | Ball & Stick model                                                                 |          |           |           |           |
|-----------------------------|-----------------------------------------------------------------------------------|------------------------------------------------------------------------------------|----------|-----------|-----------|-----------|
| <b>12<sup>Hyd2</sup></b>    | 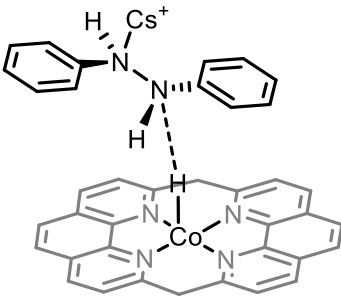 |  |          |           |           |           |
| <b>Cartesian coordinate</b> |                                                                                   | <b>Frequencies</b>                                                                 |          |           |           |           |
| -----                       |                                                                                   |                                                                                    |          |           |           |           |
| <b>Atoms</b>                | <b>X</b>                                                                          | <b>Y</b>                                                                           | <b>Z</b> |           |           |           |
| -----                       |                                                                                   |                                                                                    |          |           |           |           |
| N                           | 0.55028                                                                           | 2.32408                                                                            | -0.82740 | 16.9569   | 25.4394   | 26.7676   |
| N                           | -0.54762                                                                          | 2.68055                                                                            | -0.05672 | 37.1292   | 43.3067   | 48.0280   |
| C                           | -1.53113                                                                          | 1.67478                                                                            | 0.03206  | 53.8723   | 59.6475   | 69.3911   |
| C                           | -2.08469                                                                          | 1.30294                                                                            | 1.26086  | 83.4228   | 90.7692   | 97.9678   |
| C                           | -1.97825                                                                          | 1.04943                                                                            | -1.14050 | 106.8019  | 114.6939  | 138.7374  |
| C                           | -3.07348                                                                          | 0.32093                                                                            | 1.31583  | 155.7978  | 166.0397  | 168.9702  |
| H                           | -1.75333                                                                          | 1.79240                                                                            | 2.17372  | 198.4005  | 216.2651  | 223.0832  |
| C                           | -2.96423                                                                          | 0.07010                                                                            | -1.07621 | 241.4715  | 250.7159  | 259.4537  |
| H                           | -1.56292                                                                          | 1.36600                                                                            | -2.09154 | 260.9144  | 267.5350  | 280.1315  |
| C                           | -3.51235                                                                          | -0.30873                                                                           | 0.15241  | 283.9772  | 306.7578  | 310.3568  |
| H                           | -3.50543                                                                          | 0.05370                                                                            | 2.27510  | 317.9275  | 337.3091  | 341.4832  |
| H                           | -3.33006                                                                          | -0.37886                                                                           | -1.99522 | 353.1764  | 384.9222  | 405.0945  |
| H                           | -4.29697                                                                          | -1.05644                                                                           | 0.19757  | 408.8068  | 411.5751  | 419.3972  |
| C                           | 1.55284                                                                           | 1.51899                                                                            | -0.26755 | 424.4491  | 449.0387  | 459.9257  |
| C                           | 2.57342                                                                           | 1.03639                                                                            | -1.10339 | 462.0349  | 478.8585  | 484.9398  |
| C                           | 1.52644                                                                           | 1.11662                                                                            | 1.07431  | 488.1842  | 492.1401  | 495.3822  |
| C                           | 3.53929                                                                           | 0.17265                                                                            | -0.60458 | 498.4351  | 524.5668  | 529.8682  |
| H                           | 2.59701                                                                           | 1.34604                                                                            | -2.14455 | 537.2445  | 548.6582  | 558.9875  |
| C                           | 2.50452                                                                           | 0.24790                                                                            | 1.56385  | 584.8351  | 585.8788  | 596.1246  |
| H                           | 0.75747                                                                           | 1.48483                                                                            | 1.74416  | 598.0507  | 600.2751  | 624.2247  |
| C                           | 3.50750                                                                           | -0.23907                                                                           | 0.73169  | 627.0077  | 629.1458  | 644.9346  |
| H                           | 4.32665                                                                           | -0.18078                                                                           | -1.26264 | 679.7283  | 688.1640  | 689.3049  |
| H                           | 2.48615                                                                           | -0.03088                                                                           | 2.61352  | 697.7692  | 711.7609  | 712.5082  |
| H                           | 4.27156                                                                           | -0.90311                                                                           | 1.12010  | 715.5411  | 718.2731  | 722.5859  |
| H                           | 0.84940                                                                           | 3.04753                                                                            | -1.46726 | 740.6602  | 746.2230  | 751.4726  |
| H                           | -0.31192                                                                          | 3.11093                                                                            | 0.83413  | 754.5671  | 761.5804  | 766.9901  |
| Cs                          | -0.01646                                                                          | -1.68112                                                                           | -0.13529 | 769.5958  | 770.9329  | 773.5602  |
| C                           | -5.04390                                                                          | 0.68674                                                                            | -0.04268 | 808.5684  | 818.8057  | 819.9496  |
| C                           | -3.70087                                                                          | 2.84513                                                                            | -0.02388 | 827.0750  | 830.4881  | 832.9065  |
| H                           | -2.37687                                                                          | 4.51148                                                                            | -0.00260 | 855.5556  | 858.4606  | 861.8210  |
| C                           | -3.70086                                                                          | -2.84511                                                                           | -0.02396 | 866.9805  | 867.6540  | 869.7141  |
| C                           | -5.04390                                                                          | -0.68672                                                                           | -0.04268 | 874.8875  | 881.4767  | 900.0704  |
| C                           | -1.25756                                                                          | -2.64674                                                                           | 0.00047  | 907.9731  | 919.6585  | 923.3653  |
| H                           | -5.98116                                                                          | 1.23509                                                                            | -0.05313 | 928.9500  | 942.7792  | 950.4764  |
| H                           | -4.60015                                                                          | 3.45511                                                                            | -0.02958 | 952.5315  | 980.3631  | 981.4182  |
| C                           | -2.47341                                                                          | -3.43094                                                                           | -0.00962 | 990.3667  | 998.1915  | 1006.1241 |
|                             |                                                                                   |                                                                                    |          | 1009.9667 | 1011.3081 | 1012.8491 |
|                             |                                                                                   |                                                                                    |          | 1016.4432 | 1018.4464 | 1018.9914 |
|                             |                                                                                   |                                                                                    |          | 1020.3479 | 1020.8258 | 1043.4790 |
|                             |                                                                                   |                                                                                    |          | 1066.5306 | 1069.1851 | 1114.0667 |



|   |          |          |          |           |           |           |
|---|----------|----------|----------|-----------|-----------|-----------|
| H | -4.60014 | -3.45510 | -0.02964 | 1118.6748 | 1123.1820 | 1136.7728 |
| H | -5.98117 | -1.23506 | -0.05312 | 1141.6229 | 1159.7086 | 1168.3716 |
| H | -2.37687 | -4.51149 | -0.00276 | 1172.9410 | 1174.0124 | 1182.5670 |
| N | -1.38780 | 1.30028  | -0.01186 | 1184.7052 | 1186.5961 | 1190.9753 |
| N | -1.38782 | -1.30028 | -0.01191 | 1202.3824 | 1205.1077 | 1230.6665 |
| H | 0.00022  | -0.00008 | 1.45530  | 1237.1828 | 1243.4634 | 1246.8711 |
| C | -0.00001 | 3.27742  | 0.01504  | 1255.9281 | 1256.1598 | 1275.1954 |
| H | -0.00000 | 4.36099  | 0.02340  | 1282.3436 | 1299.3624 | 1303.0695 |
| C | -0.00000 | -3.27741 | 0.01489  | 1317.1653 | 1331.4023 | 1336.1891 |
| H | 0.00001  | -4.36099 | 0.02318  | 1352.1561 | 1368.1998 | 1377.8998 |
|   |          |          |          | 1384.3808 | 1396.7328 | 1415.6026 |
|   |          |          |          | 1421.4716 | 1433.2760 | 1451.2648 |
|   |          |          |          | 1456.9177 | 1466.8187 | 1471.1862 |
|   |          |          |          | 1473.8639 | 1478.7900 | 1480.5364 |
|   |          |          |          | 1482.2485 | 1485.2802 | 1490.1686 |
|   |          |          |          | 1520.2046 | 1527.7855 | 1532.5224 |
|   |          |          |          | 1538.7919 | 1552.8269 | 1561.5010 |
|   |          |          |          | 1567.4494 | 1569.3662 | 1574.9494 |
|   |          |          |          | 1624.6842 | 1635.2849 | 1656.7266 |
|   |          |          |          | 1677.8248 | 1681.2301 | 1683.5015 |
|   |          |          |          | 1697.8203 | 1698.2889 | 1702.0608 |
|   |          |          |          | 1703.5793 | 1709.5842 | 1719.0807 |
|   |          |          |          | 2212.8249 | 3196.8910 | 3201.3579 |
|   |          |          |          | 3202.3252 | 3203.1801 | 3205.7701 |
|   |          |          |          | 3207.9680 | 3208.4912 | 3212.5157 |
|   |          |          |          | 3214.7384 | 3220.9662 | 3221.0628 |
|   |          |          |          | 3222.7645 | 3222.9519 | 3224.2014 |
|   |          |          |          | 3225.2897 | 3226.3468 | 3227.3136 |
|   |          |          |          | 3230.6549 | 3234.7430 | 3235.8702 |
|   |          |          |          | 3236.4952 | 3239.6063 | 3240.2944 |
|   |          |          |          | 3245.6145 | 3436.6434 | 3448.3200 |

### Statistical Thermodynamic Analysis

Temperature = 403.15 K

Pressure = 1 atm

Zero-point correction= 0.569874

Electronic Energy = -1956.97508279

Internal Energy (E)= -1956.34248379

Enthalpy (H) = -1956.34120679

Gibbs Free Energy (G) = -1956.51221579

Gibbs Free Energy of Solvation = -1956.58926926

| St. Pt.             | General Structure                                                                   | Ball & Stick model                                                                   |
|---------------------|-------------------------------------------------------------------------------------|--------------------------------------------------------------------------------------|
| TS1 <sup>Hyd2</sup> | 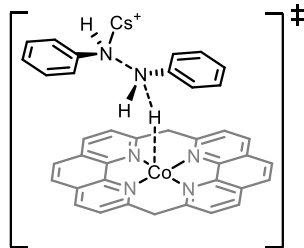 |  |

| Cartesian coordinate |          |          |          | Frequencies |           |           |
|----------------------|----------|----------|----------|-------------|-----------|-----------|
| Atoms                | X        | Y        | Z        |             |           |           |
|                      |          |          |          | -509.3505   | 11.3017   | 23.3004   |
|                      |          |          |          | 34.9088     | 36.6040   | 46.5672   |
|                      |          |          |          | 51.6789     | 58.8183   | 67.6799   |
|                      |          |          |          | 71.4463     | 75.6747   | 97.1493   |
| N                    | 0.55028  | 2.32408  | -0.82740 | 105.3381    | 118.4823  | 127.6636  |
| N                    | -0.54762 | 2.68055  | -0.05672 | 135.4432    | 146.0110  | 153.4559  |
| C                    | -1.53113 | 1.67478  | 0.03206  | 165.7854    | 172.0982  | 183.9593  |
| C                    | -2.08469 | 1.30294  | 1.26086  | 215.8340    | 239.8574  | 246.5932  |
| C                    | -1.97825 | 1.04943  | -1.14050 | 256.7376    | 263.5117  | 263.7118  |
| C                    | -3.07348 | 0.32093  | 1.31583  | 268.8324    | 276.2650  | 304.4251  |
| H                    | -1.75333 | 1.79240  | 2.17372  | 322.3103    | 331.8118  | 343.6950  |
| C                    | -2.96423 | 0.07010  | -1.07621 | 354.1560    | 374.9104  | 389.7278  |
| H                    | -1.56292 | 1.36600  | -2.09154 | 400.7037    | 402.1720  | 408.4925  |
| C                    | -3.51235 | -0.30873 | 0.15241  | 421.6885    | 427.3784  | 437.2777  |
| H                    | -3.50543 | 0.05370  | 2.27510  | 444.5763    | 459.0381  | 463.0917  |
| H                    | -3.33006 | -0.37886 | -1.99522 | 473.7937    | 483.4862  | 485.8507  |
| H                    | -4.29697 | -1.05644 | 0.19757  | 490.3471    | 492.4329  | 507.2652  |
| C                    | 1.55284  | 1.51899  | -0.26755 | 532.6411    | 533.6439  | 550.3685  |
| C                    | 2.57342  | 1.03639  | -1.10339 | 557.4561    | 574.9915  | 582.3223  |
| C                    | 1.52644  | 1.11662  | 1.07431  | 584.7285    | 595.1611  | 595.8421  |
| C                    | 3.53929  | 0.17265  | -0.60458 | 602.4659    | 623.8122  | 625.8044  |
| H                    | 2.59701  | 1.34604  | -2.14455 | 629.4145    | 673.1113  | 683.4643  |
| C                    | 2.50452  | 0.24790  | 1.56385  | 688.7722    | 694.1385  | 707.9108  |
| H                    | 0.75747  | 1.48483  | 1.74416  | 709.9852    | 713.0257  | 720.4845  |
| C                    | 3.50750  | -0.23907 | 0.73169  | 725.5097    | 733.6005  | 740.6914  |
| H                    | 4.32665  | -0.18078 | -1.26264 | 743.6524    | 754.3683  | 764.5701  |
| H                    | 2.48615  | -0.03088 | 2.61352  | 765.8115    | 774.2584  | 797.9505  |
| H                    | 4.27156  | -0.90311 | 1.12010  | 807.8188    | 812.9005  | 819.3415  |
| H                    | 0.84940  | 3.04753  | -1.46726 | 824.5673    | 833.8408  | 851.5824  |
| H                    | -0.31192 | 3.11093  | 0.83413  | 852.9125    | 855.2657  | 860.2971  |
| Cs                   | -0.01646 | -1.68112 | -0.13529 | 861.6919    | 863.6928  | 868.7975  |
| C                    | -5.04390 | 0.68674  | -0.04268 | 869.7843    | 875.8388  | 903.1265  |
| C                    | -3.70087 | 2.84513  | -0.02388 | 917.0857    | 927.2644  | 934.8260  |
| H                    | -2.37687 | 4.51148  | -0.00260 | 936.7991    | 947.1773  | 970.0491  |
| C                    | -3.70086 | -2.84511 | -0.02396 | 974.8571    | 996.3414  | 1000.1715 |
| C                    | -5.04390 | -0.68672 | -0.04268 | 1004.1804   | 1007.6464 | 1010.5035 |
| C                    | -1.25756 | -2.64674 | 0.00047  | 1012.6822   | 1013.5880 | 1016.7502 |
| H                    | -5.98116 | 1.23509  | -0.05313 | 1017.0461   | 1021.3083 | 1029.5700 |
| H                    | -4.60015 | 3.45511  | -0.02958 | 1033.2048   | 1042.0754 | 1057.7769 |
| C                    | -2.47341 | -3.43094 | -0.00962 | 1063.6059   | 1066.5481 | 1105.9001 |
| H                    | -4.60014 | -3.45510 | -0.02964 | 1112.8560   | 1120.8791 | 1131.5680 |
| H                    | -5.98117 | -1.23506 | -0.05312 | 1136.4985   | 1141.1429 | 1152.4484 |
| H                    | -2.37687 | -4.51149 | -0.00276 | 1166.7211   | 1171.6220 | 1178.8679 |
| N                    | -1.38780 | 1.30028  | -0.01186 | 1184.1989   | 1184.6864 | 1186.1251 |
| N                    | -1.38782 | -1.30028 | -0.01191 | 1200.7301   | 1201.0549 | 1226.6747 |
| H                    | 0.00022  | -0.00008 | 1.45530  | 1231.5137   | 1234.4805 | 1239.7379 |
| C                    | -0.00001 | 3.27742  | 0.01504  | 1240.0936   | 1252.4910 | 1254.3380 |
| H                    | -0.00000 | 4.36099  | 0.02340  | 1265.3896   | 1272.6584 | 1286.0797 |
| C                    | -0.00000 | -3.27741 | 0.01489  | 1288.6125   | 1294.9638 | 1319.6111 |
| H                    | 0.00001  | -4.36099 | 0.02318  | 1359.8428   | 1361.8053 | 1364.8432 |
|                      |          |          |          | 1379.5085   | 1382.1744 | 1395.3516 |
|                      |          |          |          | 1405.3352   | 1409.3239 | 1412.7306 |
|                      |          |          |          | 1446.1794   | 1453.7530 | 1466.8901 |

|  |           |           |           |
|--|-----------|-----------|-----------|
|  | 1469.4150 | 1472.6080 | 1474.2381 |
|  | 1477.2618 | 1482.3739 | 1509.9011 |
|  | 1518.0625 | 1518.9347 | 1520.6009 |
|  | 1540.2477 | 1544.6949 | 1549.3633 |
|  | 1564.1645 | 1570.0278 | 1604.5935 |
|  | 1613.6427 | 1628.8447 | 1650.4095 |
|  | 1670.3184 | 1673.4479 | 1679.1537 |
|  | 1684.0085 | 1685.8065 | 1691.6641 |
|  | 1695.8862 | 1704.1251 | 1714.1872 |
|  | 3183.5566 | 3185.5107 | 3188.9898 |
|  | 3191.6285 | 3195.9906 | 3197.1309 |
|  | 3200.4244 | 3204.9197 | 3208.9294 |
|  | 3209.1017 | 3212.4860 | 3213.3990 |
|  | 3213.5846 | 3220.3552 | 3223.2821 |
|  | 3224.4409 | 3224.5720 | 3228.0830 |
|  | 3228.1413 | 3235.6048 | 3235.9836 |
|  | 3240.2547 | 3248.0005 | 3252.9995 |
|  | 3317.6856 | 3414.8126 | 3489.8059 |

### Statistical Thermodynamic Analysis

Temperature = 403.15 K

Pressure = 1 atm

Zero-point correction = 0.569071

Electronic Energy = -1956.90709230

Internal Energy (E) = -1956.2753233

Enthalpy (H) = -1956.2740463

Gibbs Free Energy (G) = -1956.4450383

Gibbs Free Energy of Solvation = -1956.53863653

| St. Pt.                                                                                                                                                                                                                                                                                                                                                                                                                                                                                                                                                                                                                                           | General Structure | Ball & Stick model |          |   |   |   |         |         |          |   |          |         |          |   |          |         |         |   |          |         |         |   |          |         |          |   |          |         |         |                                                                                                                                                                                                                                                                                                                                                                                                                                                                                                                                                                                                                                                                                                                         |         |         |         |         |         |         |         |         |         |         |         |         |         |          |          |          |          |          |          |          |          |          |          |          |          |          |          |          |          |          |
|---------------------------------------------------------------------------------------------------------------------------------------------------------------------------------------------------------------------------------------------------------------------------------------------------------------------------------------------------------------------------------------------------------------------------------------------------------------------------------------------------------------------------------------------------------------------------------------------------------------------------------------------------|-------------------|--------------------|----------|---|---|---|---------|---------|----------|---|----------|---------|----------|---|----------|---------|---------|---|----------|---------|---------|---|----------|---------|----------|---|----------|---------|---------|-------------------------------------------------------------------------------------------------------------------------------------------------------------------------------------------------------------------------------------------------------------------------------------------------------------------------------------------------------------------------------------------------------------------------------------------------------------------------------------------------------------------------------------------------------------------------------------------------------------------------------------------------------------------------------------------------------------------------|---------|---------|---------|---------|---------|---------|---------|---------|---------|---------|---------|---------|---------|----------|----------|----------|----------|----------|----------|----------|----------|----------|----------|----------|----------|----------|----------|----------|----------|----------|
| 13 <sup>Hyd2</sup>                                                                                                                                                                                                                                                                                                                                                                                                                                                                                                                                                                                                                                |                   |                    |          |   |   |   |         |         |          |   |          |         |          |   |          |         |         |   |          |         |         |   |          |         |          |   |          |         |         |                                                                                                                                                                                                                                                                                                                                                                                                                                                                                                                                                                                                                                                                                                                         |         |         |         |         |         |         |         |         |         |         |         |         |         |          |          |          |          |          |          |          |          |          |          |          |          |          |          |          |          |          |
| <p style="text-align: center;"><b>Cartesian coordinate</b></p> <p>-----</p> <table border="1"> <thead> <tr> <th>Atoms</th> <th>X</th> <th>Y</th> <th>Z</th> </tr> </thead> <tbody> <tr><td>N</td><td>0.55028</td><td>2.32408</td><td>-0.82740</td></tr> <tr><td>N</td><td>-0.54762</td><td>2.68055</td><td>-0.05672</td></tr> <tr><td>C</td><td>-1.53113</td><td>1.67478</td><td>0.03206</td></tr> <tr><td>C</td><td>-2.08469</td><td>1.30294</td><td>1.26086</td></tr> <tr><td>C</td><td>-1.97825</td><td>1.04943</td><td>-1.14050</td></tr> <tr><td>C</td><td>-3.07348</td><td>0.32093</td><td>1.31583</td></tr> </tbody> </table> <p>-----</p> |                   | Atoms              | X        | Y | Z | N | 0.55028 | 2.32408 | -0.82740 | N | -0.54762 | 2.68055 | -0.05672 | C | -1.53113 | 1.67478 | 0.03206 | C | -2.08469 | 1.30294 | 1.26086 | C | -1.97825 | 1.04943 | -1.14050 | C | -3.07348 | 0.32093 | 1.31583 | <p style="text-align: center;"><b>Frequencies</b></p> <table border="1"> <tbody> <tr><td>17.1962</td><td>18.6349</td><td>28.1475</td></tr> <tr><td>36.5522</td><td>40.0763</td><td>42.3814</td></tr> <tr><td>53.7406</td><td>56.6904</td><td>59.5008</td></tr> <tr><td>69.6040</td><td>87.3412</td><td>89.0867</td></tr> <tr><td>95.3646</td><td>101.0910</td><td>119.6022</td></tr> <tr><td>130.4048</td><td>143.0340</td><td>165.7156</td></tr> <tr><td>169.1819</td><td>203.3706</td><td>217.4108</td></tr> <tr><td>228.0997</td><td>246.9479</td><td>250.7097</td></tr> <tr><td>258.7487</td><td>273.7988</td><td>275.8928</td></tr> <tr><td>280.6677</td><td>285.5568</td><td>314.1698</td></tr> </tbody> </table> | 17.1962 | 18.6349 | 28.1475 | 36.5522 | 40.0763 | 42.3814 | 53.7406 | 56.6904 | 59.5008 | 69.6040 | 87.3412 | 89.0867 | 95.3646 | 101.0910 | 119.6022 | 130.4048 | 143.0340 | 165.7156 | 169.1819 | 203.3706 | 217.4108 | 228.0997 | 246.9479 | 250.7097 | 258.7487 | 273.7988 | 275.8928 | 280.6677 | 285.5568 | 314.1698 |
| Atoms                                                                                                                                                                                                                                                                                                                                                                                                                                                                                                                                                                                                                                             | X                 | Y                  | Z        |   |   |   |         |         |          |   |          |         |          |   |          |         |         |   |          |         |         |   |          |         |          |   |          |         |         |                                                                                                                                                                                                                                                                                                                                                                                                                                                                                                                                                                                                                                                                                                                         |         |         |         |         |         |         |         |         |         |         |         |         |         |          |          |          |          |          |          |          |          |          |          |          |          |          |          |          |          |          |
| N                                                                                                                                                                                                                                                                                                                                                                                                                                                                                                                                                                                                                                                 | 0.55028           | 2.32408            | -0.82740 |   |   |   |         |         |          |   |          |         |          |   |          |         |         |   |          |         |         |   |          |         |          |   |          |         |         |                                                                                                                                                                                                                                                                                                                                                                                                                                                                                                                                                                                                                                                                                                                         |         |         |         |         |         |         |         |         |         |         |         |         |         |          |          |          |          |          |          |          |          |          |          |          |          |          |          |          |          |          |
| N                                                                                                                                                                                                                                                                                                                                                                                                                                                                                                                                                                                                                                                 | -0.54762          | 2.68055            | -0.05672 |   |   |   |         |         |          |   |          |         |          |   |          |         |         |   |          |         |         |   |          |         |          |   |          |         |         |                                                                                                                                                                                                                                                                                                                                                                                                                                                                                                                                                                                                                                                                                                                         |         |         |         |         |         |         |         |         |         |         |         |         |         |          |          |          |          |          |          |          |          |          |          |          |          |          |          |          |          |          |
| C                                                                                                                                                                                                                                                                                                                                                                                                                                                                                                                                                                                                                                                 | -1.53113          | 1.67478            | 0.03206  |   |   |   |         |         |          |   |          |         |          |   |          |         |         |   |          |         |         |   |          |         |          |   |          |         |         |                                                                                                                                                                                                                                                                                                                                                                                                                                                                                                                                                                                                                                                                                                                         |         |         |         |         |         |         |         |         |         |         |         |         |         |          |          |          |          |          |          |          |          |          |          |          |          |          |          |          |          |          |
| C                                                                                                                                                                                                                                                                                                                                                                                                                                                                                                                                                                                                                                                 | -2.08469          | 1.30294            | 1.26086  |   |   |   |         |         |          |   |          |         |          |   |          |         |         |   |          |         |         |   |          |         |          |   |          |         |         |                                                                                                                                                                                                                                                                                                                                                                                                                                                                                                                                                                                                                                                                                                                         |         |         |         |         |         |         |         |         |         |         |         |         |         |          |          |          |          |          |          |          |          |          |          |          |          |          |          |          |          |          |
| C                                                                                                                                                                                                                                                                                                                                                                                                                                                                                                                                                                                                                                                 | -1.97825          | 1.04943            | -1.14050 |   |   |   |         |         |          |   |          |         |          |   |          |         |         |   |          |         |         |   |          |         |          |   |          |         |         |                                                                                                                                                                                                                                                                                                                                                                                                                                                                                                                                                                                                                                                                                                                         |         |         |         |         |         |         |         |         |         |         |         |         |         |          |          |          |          |          |          |          |          |          |          |          |          |          |          |          |          |          |
| C                                                                                                                                                                                                                                                                                                                                                                                                                                                                                                                                                                                                                                                 | -3.07348          | 0.32093            | 1.31583  |   |   |   |         |         |          |   |          |         |          |   |          |         |         |   |          |         |         |   |          |         |          |   |          |         |         |                                                                                                                                                                                                                                                                                                                                                                                                                                                                                                                                                                                                                                                                                                                         |         |         |         |         |         |         |         |         |         |         |         |         |         |          |          |          |          |          |          |          |          |          |          |          |          |          |          |          |          |          |
| 17.1962                                                                                                                                                                                                                                                                                                                                                                                                                                                                                                                                                                                                                                           | 18.6349           | 28.1475            |          |   |   |   |         |         |          |   |          |         |          |   |          |         |         |   |          |         |         |   |          |         |          |   |          |         |         |                                                                                                                                                                                                                                                                                                                                                                                                                                                                                                                                                                                                                                                                                                                         |         |         |         |         |         |         |         |         |         |         |         |         |         |          |          |          |          |          |          |          |          |          |          |          |          |          |          |          |          |          |
| 36.5522                                                                                                                                                                                                                                                                                                                                                                                                                                                                                                                                                                                                                                           | 40.0763           | 42.3814            |          |   |   |   |         |         |          |   |          |         |          |   |          |         |         |   |          |         |         |   |          |         |          |   |          |         |         |                                                                                                                                                                                                                                                                                                                                                                                                                                                                                                                                                                                                                                                                                                                         |         |         |         |         |         |         |         |         |         |         |         |         |         |          |          |          |          |          |          |          |          |          |          |          |          |          |          |          |          |          |
| 53.7406                                                                                                                                                                                                                                                                                                                                                                                                                                                                                                                                                                                                                                           | 56.6904           | 59.5008            |          |   |   |   |         |         |          |   |          |         |          |   |          |         |         |   |          |         |         |   |          |         |          |   |          |         |         |                                                                                                                                                                                                                                                                                                                                                                                                                                                                                                                                                                                                                                                                                                                         |         |         |         |         |         |         |         |         |         |         |         |         |         |          |          |          |          |          |          |          |          |          |          |          |          |          |          |          |          |          |
| 69.6040                                                                                                                                                                                                                                                                                                                                                                                                                                                                                                                                                                                                                                           | 87.3412           | 89.0867            |          |   |   |   |         |         |          |   |          |         |          |   |          |         |         |   |          |         |         |   |          |         |          |   |          |         |         |                                                                                                                                                                                                                                                                                                                                                                                                                                                                                                                                                                                                                                                                                                                         |         |         |         |         |         |         |         |         |         |         |         |         |         |          |          |          |          |          |          |          |          |          |          |          |          |          |          |          |          |          |
| 95.3646                                                                                                                                                                                                                                                                                                                                                                                                                                                                                                                                                                                                                                           | 101.0910          | 119.6022           |          |   |   |   |         |         |          |   |          |         |          |   |          |         |         |   |          |         |         |   |          |         |          |   |          |         |         |                                                                                                                                                                                                                                                                                                                                                                                                                                                                                                                                                                                                                                                                                                                         |         |         |         |         |         |         |         |         |         |         |         |         |         |          |          |          |          |          |          |          |          |          |          |          |          |          |          |          |          |          |
| 130.4048                                                                                                                                                                                                                                                                                                                                                                                                                                                                                                                                                                                                                                          | 143.0340          | 165.7156           |          |   |   |   |         |         |          |   |          |         |          |   |          |         |         |   |          |         |         |   |          |         |          |   |          |         |         |                                                                                                                                                                                                                                                                                                                                                                                                                                                                                                                                                                                                                                                                                                                         |         |         |         |         |         |         |         |         |         |         |         |         |         |          |          |          |          |          |          |          |          |          |          |          |          |          |          |          |          |          |
| 169.1819                                                                                                                                                                                                                                                                                                                                                                                                                                                                                                                                                                                                                                          | 203.3706          | 217.4108           |          |   |   |   |         |         |          |   |          |         |          |   |          |         |         |   |          |         |         |   |          |         |          |   |          |         |         |                                                                                                                                                                                                                                                                                                                                                                                                                                                                                                                                                                                                                                                                                                                         |         |         |         |         |         |         |         |         |         |         |         |         |         |          |          |          |          |          |          |          |          |          |          |          |          |          |          |          |          |          |
| 228.0997                                                                                                                                                                                                                                                                                                                                                                                                                                                                                                                                                                                                                                          | 246.9479          | 250.7097           |          |   |   |   |         |         |          |   |          |         |          |   |          |         |         |   |          |         |         |   |          |         |          |   |          |         |         |                                                                                                                                                                                                                                                                                                                                                                                                                                                                                                                                                                                                                                                                                                                         |         |         |         |         |         |         |         |         |         |         |         |         |         |          |          |          |          |          |          |          |          |          |          |          |          |          |          |          |          |          |
| 258.7487                                                                                                                                                                                                                                                                                                                                                                                                                                                                                                                                                                                                                                          | 273.7988          | 275.8928           |          |   |   |   |         |         |          |   |          |         |          |   |          |         |         |   |          |         |         |   |          |         |          |   |          |         |         |                                                                                                                                                                                                                                                                                                                                                                                                                                                                                                                                                                                                                                                                                                                         |         |         |         |         |         |         |         |         |         |         |         |         |         |          |          |          |          |          |          |          |          |          |          |          |          |          |          |          |          |          |
| 280.6677                                                                                                                                                                                                                                                                                                                                                                                                                                                                                                                                                                                                                                          | 285.5568          | 314.1698           |          |   |   |   |         |         |          |   |          |         |          |   |          |         |         |   |          |         |         |   |          |         |          |   |          |         |         |                                                                                                                                                                                                                                                                                                                                                                                                                                                                                                                                                                                                                                                                                                                         |         |         |         |         |         |         |         |         |         |         |         |         |         |          |          |          |          |          |          |          |          |          |          |          |          |          |          |          |          |          |

|    |          |          |          |           |           |           |
|----|----------|----------|----------|-----------|-----------|-----------|
| H  | -1.75333 | 1.79240  | 2.17372  | 340.3321  | 347.6390  | 355.5404  |
| C  | -2.96423 | 0.07010  | -1.07621 | 383.1081  | 393.3731  | 403.4975  |
| H  | -1.56292 | 1.36600  | -2.09154 | 407.3101  | 410.0090  | 424.1130  |
| C  | -3.51235 | -0.30873 | 0.15241  | 425.3702  | 426.3678  | 448.9532  |
| H  | -3.50543 | 0.05370  | 2.27510  | 457.8622  | 465.7580  | 472.1023  |
| H  | -3.33006 | -0.37886 | -1.99522 | 483.3859  | 486.3387  | 490.8313  |
| H  | -4.29697 | -1.05644 | 0.19757  | 495.2079  | 499.2837  | 505.6027  |
| C  | 1.55284  | 1.51899  | -0.26755 | 535.3127  | 538.8377  | 540.9203  |
| C  | 2.57342  | 1.03639  | -1.10339 | 556.7193  | 569.6514  | 584.3081  |
| C  | 1.52644  | 1.11662  | 1.07431  | 585.4520  | 593.8475  | 594.5867  |
| C  | 3.53929  | 0.17265  | -0.60458 | 597.2455  | 600.9838  | 625.3389  |
| H  | 2.59701  | 1.34604  | -2.14455 | 630.8593  | 631.6804  | 677.5900  |
| C  | 2.50452  | 0.24790  | 1.56385  | 685.9829  | 687.3656  | 712.9658  |
| H  | 0.75747  | 1.48483  | 1.74416  | 714.7269  | 716.7791  | 719.6850  |
| C  | 3.50750  | -0.23907 | 0.73169  | 722.5846  | 743.1109  | 746.6338  |
| H  | 4.32665  | -0.18078 | -1.26264 | 756.8222  | 767.2735  | 772.1103  |
| H  | 2.48615  | -0.03088 | 2.61352  | 773.5799  | 774.6206  | 796.0773  |
| H  | 4.27156  | -0.90311 | 1.12010  | 815.4205  | 819.5423  | 826.2166  |
| H  | 0.84940  | 3.04753  | -1.46726 | 830.0489  | 833.6312  | 851.9921  |
| H  | -0.31192 | 3.11093  | 0.83413  | 855.5523  | 861.1349  | 863.2341  |
| Cs | -0.01646 | -1.68112 | -0.13529 | 864.6695  | 870.4307  | 871.2106  |
| C  | -5.04390 | 0.68674  | -0.04268 | 873.7131  | 882.0170  | 900.9765  |
| C  | -3.70087 | 2.84513  | -0.02388 | 908.3390  | 920.7293  | 926.6193  |
| H  | -2.37687 | 4.51148  | -0.00260 | 938.5794  | 941.7799  | 947.7396  |
| C  | -3.70086 | -2.84511 | -0.02396 | 952.4421  | 975.2053  | 981.7360  |
| C  | -5.04390 | -0.68672 | -0.04268 | 997.2448  | 999.7719  | 1006.7290 |
| C  | -1.25756 | -2.64674 | 0.00047  | 1009.3260 | 1012.4065 | 1013.3120 |
| H  | -5.98116 | 1.23509  | -0.05313 | 1015.6127 | 1016.2777 | 1017.1304 |
| H  | -4.60015 | 3.45511  | -0.02958 | 1019.5655 | 1021.3148 | 1042.9309 |
| C  | -2.47341 | -3.43094 | -0.00962 | 1067.5698 | 1068.9735 | 1105.2832 |
| H  | -4.60014 | -3.45510 | -0.02964 | 1117.7714 | 1119.6575 | 1134.7878 |
| H  | -5.98117 | -1.23506 | -0.05312 | 1144.1354 | 1158.5814 | 1168.0292 |
| H  | -2.37687 | -4.51149 | -0.00276 | 1170.1815 | 1173.7512 | 1183.0242 |
| N  | -1.38780 | 1.30028  | -0.01186 | 1184.3690 | 1185.9908 | 1186.7402 |
| N  | -1.38782 | -1.30028 | -0.01191 | 1201.3077 | 1205.1468 | 1236.2784 |
| H  | 0.00022  | -0.00008 | 1.45530  | 1241.2470 | 1245.5745 | 1249.1548 |
| C  | -0.00001 | 3.27742  | 0.01504  | 1258.2687 | 1259.6570 | 1266.1520 |
| H  | -0.00000 | 4.36099  | 0.02340  | 1278.9959 | 1297.8025 | 1301.4136 |
| C  | -0.00000 | -3.27741 | 0.01489  | 1303.1028 | 1312.2751 | 1330.8945 |
| H  | 0.00001  | -4.36099 | 0.02318  | 1360.6345 | 1362.6905 | 1376.3141 |
|    |          |          |          | 1386.6477 | 1394.1839 | 1398.0774 |
|    |          |          |          | 1422.3582 | 1427.0187 | 1437.9913 |
|    |          |          |          | 1457.1296 | 1458.7243 | 1459.3948 |
|    |          |          |          | 1472.6285 | 1475.9414 | 1479.1297 |
|    |          |          |          | 1480.5990 | 1484.2400 | 1516.0021 |
|    |          |          |          | 1518.7577 | 1524.5551 | 1530.3989 |
|    |          |          |          | 1543.2112 | 1556.1044 | 1564.5757 |
|    |          |          |          | 1568.8228 | 1576.8097 | 1626.1080 |
|    |          |          |          | 1633.4631 | 1656.2218 | 1658.7824 |
|    |          |          |          | 1663.6480 | 1679.6910 | 1684.2578 |
|    |          |          |          | 1687.6307 | 1698.4913 | 1702.7911 |
|    |          |          |          | 1705.6326 | 1707.6026 | 1716.8104 |
|    |          |          |          | 3174.5363 | 3178.0879 | 3191.6974 |
|    |          |          |          | 3196.3939 | 3203.9592 | 3204.2580 |
|    |          |          |          | 3208.2318 | 3208.5673 | 3210.5381 |

|  |           |           |           |
|--|-----------|-----------|-----------|
|  | 3210.7977 | 3213.8919 | 3215.0030 |
|  | 3220.3197 | 3223.1744 | 3223.9173 |
|  | 3224.4521 | 3226.1011 | 3227.0629 |
|  | 3228.3837 | 3231.9292 | 3234.3960 |
|  | 3236.1893 | 3236.7283 | 3237.3924 |
|  | 3415.9850 | 3472.5241 | 3611.0719 |

### Statistical Thermodynamic Analysis

Temperature = 403.15 K

Pressure = 1 atm

Zero-point correction = 0.571352

Electronic Energy = -1957.02713211

Internal Energy (E) = -1956.39230011

Enthalpy (H) = -1956.39102311

Gibbs Free Energy (G) = -1956.56500811

Gibbs Free Energy of Solvation = -1956.63531432

| St. Pt.                     | General Structure |          |          | Ball & Stick model |           |           |
|-----------------------------|-------------------|----------|----------|--------------------|-----------|-----------|
| Hydroazobenzene             |                   |          |          |                    |           |           |
| <b>Cartesian coordinate</b> |                   |          |          | <b>Frequencies</b> |           |           |
| -----                       |                   |          |          |                    |           |           |
| Atoms                       | X                 | Y        | Z        |                    |           |           |
| -----                       |                   |          |          |                    |           |           |
| C                           | -1.59132          | -0.55569 | -0.33936 | 31.6743            | 42.8056   | 59.0835   |
| C                           | -2.52583          | 0.01320  | -1.21175 | 180.0005           | 190.8358  | 273.8449  |
| C                           | -3.62311          | 0.69949  | -0.70773 | 301.2901           | 348.5481  | 417.4308  |
| C                           | -3.80531          | 0.83130  | 0.66686  | 420.4240           | 491.9594  | 518.3637  |
| C                           | -2.86991          | 0.26676  | 1.52963  | 528.6575           | 541.7592  | 586.2277  |
| C                           | -1.76563          | -0.42235 | 1.03972  | 627.0738           | 629.8272  | 664.8776  |
| H                           | -2.39021          | -0.09261 | -2.28537 | 710.4348           | 712.5571  | 742.8324  |
| H                           | -4.33978          | 1.13443  | -1.39750 | 772.4518           | 778.0717  | 847.6298  |
| H                           | -4.66217          | 1.36834  | 1.05868  | 854.5930           | 862.3977  | 874.7736  |
| H                           | -2.99515          | 0.36634  | 2.60360  | 908.2723           | 917.4813  | 983.7082  |
| H                           | -1.03067          | -0.85462 | 1.70814  | 989.1672           | 1006.1803 | 1009.5242 |
| N                           | -0.51656          | -1.28507 | -0.88411 | 1012.2350          | 1013.4468 | 1068.1104 |
| H                           | -0.25577          | -0.96723 | -1.81517 | 1073.6758          | 1113.6753 | 1128.7800 |
| N                           | 0.57640           | -1.50826 | -0.05795 | 1175.9481          | 1182.3122 | 1195.4195 |
| H                           | 0.88139           | -2.47146 | -0.09771 | 1203.2230          | 1214.8859 | 1285.2695 |
| C                           | 1.62013           | -0.56940 | -0.04146 | 1331.1326          | 1347.9046 | 1353.8997 |
| C                           | 1.41369           | 0.75931  | -0.42515 | 1368.2967          | 1376.6143 | 1472.7577 |
| C                           | 2.88666           | -0.96753 | 0.40461  | 1490.1658          | 1540.9569 | 1544.5855 |
| C                           | 2.46743           | 1.66716  | -0.36071 | 1560.6968          | 1564.6729 | 1685.6010 |
| H                           | 0.43200           | 1.08677  | -0.75014 | 1687.4993          | 1703.5932 | 1708.9396 |
|                             |                   |          |          | 3186.2398          | 3190.0473 | 3201.5423 |
|                             |                   |          |          | 3203.1731          | 3213.0750 | 3216.8439 |
|                             |                   |          |          | 3225.8220          | 3230.1418 | 3230.8239 |

|   |          |          |          |           |           |           |
|---|----------|----------|----------|-----------|-----------|-----------|
| C | 3.92626  | -0.05085 | 0.46366  | 3249.2533 | 3506.3378 | 3614.8208 |
| H | 3.04766  | -1.99995 | 0.70430  |           |           |           |
| C | 3.72640  | 1.27442  | 0.07975  |           |           |           |
| H | 2.29337  | 2.69669  | -0.65803 |           |           |           |
| H | 4.90254  | -0.37674 | 0.80875  |           |           |           |
| H | 4.54117  | 1.98841  | 0.12634  |           |           |           |
| C | 3.82628  | 1.39527  | -0.09170 |           |           |           |
| C | 5.04592  | -0.71999 | -0.18079 |           |           |           |
| C | 3.68573  | -2.85612 | -0.15703 |           |           |           |
| H | 2.32963  | -4.51250 | -0.19077 |           |           |           |
| C | 3.72116  | 2.82537  | -0.09574 |           |           |           |
| C | 5.04215  | 0.64935  | -0.16783 |           |           |           |
| C | 1.27913  | 2.64979  | 0.02889  |           |           |           |
| H | 5.97926  | -1.26824 | -0.25207 |           |           |           |
| H | 4.57397  | -3.47685 | -0.23081 |           |           |           |
| C | 2.50038  | 3.42118  | -0.03734 |           |           |           |
| H | 4.62414  | 3.42615  | -0.14688 |           |           |           |
| H | 5.97941  | 1.19435  | -0.22462 |           |           |           |
| H | 2.41296  | 4.50196  | -0.04125 |           |           |           |
| N | 1.39837  | -1.30919 | 0.06494  |           |           |           |
| N | 1.39857  | 1.30012  | 0.04294  |           |           |           |
| H | 0.19989  | 0.13900  | 1.59991  |           |           |           |
| C | -0.04820 | -3.26690 | -0.06233 |           |           |           |
| H | -0.03262 | -4.33522 | -0.25561 |           |           |           |
| C | 0.02703  | 3.28554  | 0.04759  |           |           |           |
| H | 0.03107  | 4.36759  | 0.00562  |           |           |           |
| H | -1.39197 | -1.36276 | 1.51537  |           |           |           |

### Statistical Thermodynamic Analysis

Temperature = 353.15 K

Pressure= 1 atm

Zero-point correction = 0.217559

Electronic Energy = -573.740563624

Internal Energy (E) = -573.507559624

Enthalpy (H)= -573.506441624

Gibbs Free Energy (G) = -573.571301624

Gibbs Free Energy of Solvation=-573.579751928

| St. Pt.                  | General Structure                               | Ball & Stick model        |
|--------------------------|-------------------------------------------------|---------------------------|
| TS1 <sup>Hyd2(MLC)</sup> |                                                 |                           |
|                          | <p><b>Cartesian coordinate</b></p> <p>-----</p> | <p><b>Frequencies</b></p> |

| Atoms | X        | Y        | Z        |           |           |           |
|-------|----------|----------|----------|-----------|-----------|-----------|
|       |          |          |          | -744.8852 | 11.8960   | 21.9109   |
|       |          |          |          | 29.5133   | 37.0112   | 51.4242   |
|       |          |          |          | 52.6416   | 60.0822   | 66.3070   |
|       |          |          |          | 81.1780   | 82.7442   | 112.8138  |
| C     | -1.59132 | -0.55569 | -0.33936 | 125.5632  | 143.5098  | 161.1357  |
| C     | -2.52583 | 0.01320  | -1.21175 | 180.6343  | 199.2285  | 212.7984  |
| C     | -3.62311 | 0.69949  | -0.70773 | 225.5173  | 240.4088  | 246.9579  |
| C     | -3.80531 | 0.83130  | 0.66686  | 254.6187  | 256.4449  | 265.2306  |
| C     | -2.86991 | 0.26676  | 1.52963  | 281.6696  | 288.4699  | 307.6257  |
| C     | -1.76563 | -0.42235 | 1.03972  | 316.6561  | 334.2803  | 338.7242  |
| H     | -2.39021 | -0.09261 | -2.28537 | 348.8341  | 382.4749  | 396.4891  |
| H     | -4.33978 | 1.13443  | -1.39750 | 405.4175  | 408.0786  | 410.0429  |
| H     | -4.66217 | 1.36834  | 1.05868  | 415.2007  | 446.8716  | 452.5855  |
| H     | -2.99515 | 0.36634  | 2.60360  | 456.4416  | 472.3715  | 481.1130  |
| H     | -1.03067 | -0.85462 | 1.70814  | 483.5493  | 489.9509  | 491.2577  |
| N     | -0.51656 | -1.28507 | -0.88411 | 502.1338  | 512.2641  | 526.2411  |
| H     | -0.25577 | -0.96723 | -1.81517 | 537.0996  | 555.6408  | 565.7456  |
| N     | 0.57640  | -1.50826 | -0.05795 | 579.8164  | 584.2946  | 591.1939  |
| H     | 0.88139  | -2.47146 | -0.09771 | 593.9119  | 599.3002  | 605.8515  |
| C     | 1.62013  | -0.56940 | -0.04146 | 623.3655  | 624.0830  | 632.6021  |
| C     | 1.41369  | 0.75931  | -0.42515 | 648.1026  | 674.7345  | 684.7605  |
| C     | 2.88666  | -0.96753 | 0.40461  | 685.5180  | 697.7472  | 702.7766  |
| C     | 2.46743  | 1.66716  | -0.36071 | 709.6310  | 710.8918  | 716.5076  |
| H     | 0.43200  | 1.08677  | -0.75014 | 718.9371  | 739.9382  | 745.3404  |
| C     | 3.92626  | -0.05085 | 0.46366  | 751.3500  | 765.0394  | 765.6150  |
| H     | 3.04766  | -1.99995 | 0.70430  | 777.6964  | 779.0815  | 781.9065  |
| C     | 3.72640  | 1.27442  | 0.07975  | 786.4268  | 811.4555  | 816.8582  |
| H     | 2.29337  | 2.69669  | -0.65803 | 821.1661  | 830.2837  | 832.0377  |
| H     | 4.90254  | -0.37674 | 0.80875  | 844.1879  | 844.7969  | 848.6232  |
| H     | 4.54117  | 1.98841  | 0.12634  | 855.9069  | 857.0509  | 866.0841  |
| C     | 3.82628  | 1.39527  | -0.09170 | 875.3760  | 880.3289  | 884.8426  |
| C     | 5.04592  | -0.71999 | -0.18079 | 891.9344  | 897.7921  | 916.4284  |
| C     | 3.68573  | -2.85612 | -0.15703 | 919.2825  | 932.4438  | 932.9071  |
| H     | 2.32963  | -4.51250 | -0.19077 | 952.8505  | 981.2416  | 987.9815  |
| C     | 3.72116  | 2.82537  | -0.09574 | 992.5516  | 997.4568  | 1005.0455 |
| C     | 5.04215  | 0.64935  | -0.16783 | 1007.2981 | 1014.5138 | 1018.3734 |
| C     | 1.27913  | 2.64979  | 0.02889  | 1020.8227 | 1021.8484 | 1022.0884 |
| H     | 5.97926  | -1.26824 | -0.25207 | 1024.3470 | 1029.0341 | 1036.0199 |
| H     | 4.57397  | -3.47685 | -0.23081 | 1041.5781 | 1063.8674 | 1079.5002 |
| C     | 2.50038  | 3.42118  | -0.03734 | 1111.0031 | 1114.9259 | 1127.6107 |
| H     | 4.62414  | 3.42615  | -0.14688 | 1134.4084 | 1143.9693 | 1157.0649 |
| H     | 5.97941  | 1.19435  | -0.22462 | 1170.9484 | 1174.5579 | 1181.6467 |
| H     | 2.41296  | 4.50196  | -0.04125 | 1182.0570 | 1183.5488 | 1193.3121 |
| N     | 1.39837  | -1.30919 | 0.06494  | 1194.3061 | 1196.2042 | 1220.5334 |
| N     | 1.39857  | 1.30012  | 0.04294  | 1225.4695 | 1241.8239 | 1245.7606 |
| H     | 0.19989  | 0.13900  | 1.59991  | 1247.9979 | 1253.6435 | 1256.6965 |
| C     | -0.04820 | -3.26690 | -0.06233 | 1258.1784 | 1271.6836 | 1282.4853 |
| H     | -0.03262 | -4.33522 | -0.25561 | 1301.1652 | 1312.5882 | 1329.1784 |
| C     | 0.02703  | 3.28554  | 0.04759  | 1335.2204 | 1354.6912 | 1357.7903 |
| H     | 0.03107  | 4.36759  | 0.00562  | 1367.3734 | 1379.1632 | 1392.8609 |
| H     | -1.39197 | -1.36276 | 1.51537  | 1409.0954 | 1417.9089 | 1422.4072 |
|       |          |          |          | 1443.4617 | 1448.2993 | 1450.0733 |
|       |          |          |          | 1458.7173 | 1463.9120 | 1469.5267 |
|       |          |          |          | 1478.5981 | 1480.1447 | 1485.0203 |
|       |          |          |          | 1501.8189 | 1510.6320 | 1527.9677 |

|  |           |           |           |
|--|-----------|-----------|-----------|
|  | 1531.2481 | 1536.2858 | 1546.9928 |
|  | 1562.5756 | 1568.6953 | 1574.0611 |
|  | 1575.8597 | 1603.2441 | 1629.2466 |
|  | 1629.8849 | 1649.3532 | 1667.8653 |
|  | 1683.2868 | 1695.1055 | 1697.4574 |
|  | 1697.8154 | 1702.1920 | 1703.8414 |
|  | 1706.8085 | 1714.7576 | 1722.1244 |
|  | 2133.4595 | 3179.4346 | 3192.5536 |
|  | 3207.5750 | 3210.6050 | 3211.2750 |
|  | 3212.5935 | 3215.2993 | 3219.1937 |
|  | 3220.0821 | 3221.3791 | 3222.8547 |
|  | 3224.2249 | 3224.8552 | 3227.8621 |
|  | 3228.4111 | 3229.3013 | 3234.9288 |
|  | 3239.2669 | 3239.6832 | 3241.4288 |
|  | 3242.4336 | 3246.7274 | 3246.8926 |
|  | 3247.8787 | 3407.9653 | 3566.2699 |

### Statistical Thermodynamic Analysis

Temperature = 353.15 K

Pressure = 1 atm

Zero-point correction = 0.577333

Electronic Energy = -1937.62461250

Internal Energy (E) = -1937.0018905

Enthalpy (H) = -1937.0007715

Gibbs Free Energy (G) = -1937.1294625

Gibbs Free Energy of Solvation = -1937.18501043

| St. Pt.                                                                                                                                                                                                                                                                                                                                                                                                                                                                                                                                                                                                                                                                                                                                                                                           | General Structure                                                                   | Ball & Stick model                                                                   |          |   |   |   |          |          |          |   |          |         |          |   |          |         |          |   |          |         |         |   |          |         |         |   |          |          |         |   |          |          |          |   |          |         |          |                                                                                                                                                                                                                                                                                                                                                                                                                                                                                                                                                                                                                                                                                                                                                                                                                                                       |         |         |         |         |         |         |         |         |         |          |          |          |          |          |          |          |          |          |          |          |          |          |          |          |          |          |          |          |          |          |          |          |          |          |          |          |
|---------------------------------------------------------------------------------------------------------------------------------------------------------------------------------------------------------------------------------------------------------------------------------------------------------------------------------------------------------------------------------------------------------------------------------------------------------------------------------------------------------------------------------------------------------------------------------------------------------------------------------------------------------------------------------------------------------------------------------------------------------------------------------------------------|-------------------------------------------------------------------------------------|--------------------------------------------------------------------------------------|----------|---|---|---|----------|----------|----------|---|----------|---------|----------|---|----------|---------|----------|---|----------|---------|---------|---|----------|---------|---------|---|----------|----------|---------|---|----------|----------|----------|---|----------|---------|----------|-------------------------------------------------------------------------------------------------------------------------------------------------------------------------------------------------------------------------------------------------------------------------------------------------------------------------------------------------------------------------------------------------------------------------------------------------------------------------------------------------------------------------------------------------------------------------------------------------------------------------------------------------------------------------------------------------------------------------------------------------------------------------------------------------------------------------------------------------------|---------|---------|---------|---------|---------|---------|---------|---------|---------|----------|----------|----------|----------|----------|----------|----------|----------|----------|----------|----------|----------|----------|----------|----------|----------|----------|----------|----------|----------|----------|----------|----------|----------|----------|----------|----------|
| 12Hyd2(MLC)                                                                                                                                                                                                                                                                                                                                                                                                                                                                                                                                                                                                                                                                                                                                                                                       | 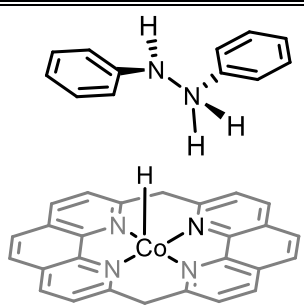 |  |          |   |   |   |          |          |          |   |          |         |          |   |          |         |          |   |          |         |         |   |          |         |         |   |          |          |         |   |          |          |          |   |          |         |          |                                                                                                                                                                                                                                                                                                                                                                                                                                                                                                                                                                                                                                                                                                                                                                                                                                                       |         |         |         |         |         |         |         |         |         |          |          |          |          |          |          |          |          |          |          |          |          |          |          |          |          |          |          |          |          |          |          |          |          |          |          |          |
| <p style="text-align: center;"><b>Cartesian coordinate</b></p> <p>-----</p> <table border="1"> <thead> <tr> <th>Atoms</th> <th>X</th> <th>Y</th> <th>Z</th> </tr> </thead> <tbody> <tr><td>C</td><td>-1.59132</td><td>-0.55569</td><td>-0.33936</td></tr> <tr><td>C</td><td>-2.52583</td><td>0.01320</td><td>-1.21175</td></tr> <tr><td>C</td><td>-3.62311</td><td>0.69949</td><td>-0.70773</td></tr> <tr><td>C</td><td>-3.80531</td><td>0.83130</td><td>0.66686</td></tr> <tr><td>C</td><td>-2.86991</td><td>0.26676</td><td>1.52963</td></tr> <tr><td>C</td><td>-1.76563</td><td>-0.42235</td><td>1.03972</td></tr> <tr><td>H</td><td>-2.39021</td><td>-0.09261</td><td>-2.28537</td></tr> <tr><td>H</td><td>-4.33978</td><td>1.13443</td><td>-1.39750</td></tr> </tbody> </table> <p>-----</p> |                                                                                     | Atoms                                                                                | X        | Y | Z | C | -1.59132 | -0.55569 | -0.33936 | C | -2.52583 | 0.01320 | -1.21175 | C | -3.62311 | 0.69949 | -0.70773 | C | -3.80531 | 0.83130 | 0.66686 | C | -2.86991 | 0.26676 | 1.52963 | C | -1.76563 | -0.42235 | 1.03972 | H | -2.39021 | -0.09261 | -2.28537 | H | -4.33978 | 1.13443 | -1.39750 | <p style="text-align: center;"><b>Frequencies</b></p> <table border="1"> <tbody> <tr><td>13.8590</td><td>21.6987</td><td>29.8109</td></tr> <tr><td>43.7489</td><td>51.2559</td><td>52.9671</td></tr> <tr><td>54.4181</td><td>66.1216</td><td>73.5237</td></tr> <tr><td>100.0022</td><td>111.8898</td><td>126.4151</td></tr> <tr><td>141.0195</td><td>164.0268</td><td>168.5883</td></tr> <tr><td>174.3953</td><td>185.7569</td><td>210.0110</td></tr> <tr><td>221.6353</td><td>242.6403</td><td>249.1870</td></tr> <tr><td>260.0494</td><td>260.6001</td><td>265.5966</td></tr> <tr><td>276.5906</td><td>284.2906</td><td>306.8324</td></tr> <tr><td>334.3540</td><td>340.5225</td><td>345.2681</td></tr> <tr><td>352.4735</td><td>384.5463</td><td>406.0712</td></tr> <tr><td>408.7349</td><td>411.7528</td><td>412.0980</td></tr> </tbody> </table> | 13.8590 | 21.6987 | 29.8109 | 43.7489 | 51.2559 | 52.9671 | 54.4181 | 66.1216 | 73.5237 | 100.0022 | 111.8898 | 126.4151 | 141.0195 | 164.0268 | 168.5883 | 174.3953 | 185.7569 | 210.0110 | 221.6353 | 242.6403 | 249.1870 | 260.0494 | 260.6001 | 265.5966 | 276.5906 | 284.2906 | 306.8324 | 334.3540 | 340.5225 | 345.2681 | 352.4735 | 384.5463 | 406.0712 | 408.7349 | 411.7528 | 412.0980 |
| Atoms                                                                                                                                                                                                                                                                                                                                                                                                                                                                                                                                                                                                                                                                                                                                                                                             | X                                                                                   | Y                                                                                    | Z        |   |   |   |          |          |          |   |          |         |          |   |          |         |          |   |          |         |         |   |          |         |         |   |          |          |         |   |          |          |          |   |          |         |          |                                                                                                                                                                                                                                                                                                                                                                                                                                                                                                                                                                                                                                                                                                                                                                                                                                                       |         |         |         |         |         |         |         |         |         |          |          |          |          |          |          |          |          |          |          |          |          |          |          |          |          |          |          |          |          |          |          |          |          |          |          |          |
| C                                                                                                                                                                                                                                                                                                                                                                                                                                                                                                                                                                                                                                                                                                                                                                                                 | -1.59132                                                                            | -0.55569                                                                             | -0.33936 |   |   |   |          |          |          |   |          |         |          |   |          |         |          |   |          |         |         |   |          |         |         |   |          |          |         |   |          |          |          |   |          |         |          |                                                                                                                                                                                                                                                                                                                                                                                                                                                                                                                                                                                                                                                                                                                                                                                                                                                       |         |         |         |         |         |         |         |         |         |          |          |          |          |          |          |          |          |          |          |          |          |          |          |          |          |          |          |          |          |          |          |          |          |          |          |          |
| C                                                                                                                                                                                                                                                                                                                                                                                                                                                                                                                                                                                                                                                                                                                                                                                                 | -2.52583                                                                            | 0.01320                                                                              | -1.21175 |   |   |   |          |          |          |   |          |         |          |   |          |         |          |   |          |         |         |   |          |         |         |   |          |          |         |   |          |          |          |   |          |         |          |                                                                                                                                                                                                                                                                                                                                                                                                                                                                                                                                                                                                                                                                                                                                                                                                                                                       |         |         |         |         |         |         |         |         |         |          |          |          |          |          |          |          |          |          |          |          |          |          |          |          |          |          |          |          |          |          |          |          |          |          |          |          |
| C                                                                                                                                                                                                                                                                                                                                                                                                                                                                                                                                                                                                                                                                                                                                                                                                 | -3.62311                                                                            | 0.69949                                                                              | -0.70773 |   |   |   |          |          |          |   |          |         |          |   |          |         |          |   |          |         |         |   |          |         |         |   |          |          |         |   |          |          |          |   |          |         |          |                                                                                                                                                                                                                                                                                                                                                                                                                                                                                                                                                                                                                                                                                                                                                                                                                                                       |         |         |         |         |         |         |         |         |         |          |          |          |          |          |          |          |          |          |          |          |          |          |          |          |          |          |          |          |          |          |          |          |          |          |          |          |
| C                                                                                                                                                                                                                                                                                                                                                                                                                                                                                                                                                                                                                                                                                                                                                                                                 | -3.80531                                                                            | 0.83130                                                                              | 0.66686  |   |   |   |          |          |          |   |          |         |          |   |          |         |          |   |          |         |         |   |          |         |         |   |          |          |         |   |          |          |          |   |          |         |          |                                                                                                                                                                                                                                                                                                                                                                                                                                                                                                                                                                                                                                                                                                                                                                                                                                                       |         |         |         |         |         |         |         |         |         |          |          |          |          |          |          |          |          |          |          |          |          |          |          |          |          |          |          |          |          |          |          |          |          |          |          |          |
| C                                                                                                                                                                                                                                                                                                                                                                                                                                                                                                                                                                                                                                                                                                                                                                                                 | -2.86991                                                                            | 0.26676                                                                              | 1.52963  |   |   |   |          |          |          |   |          |         |          |   |          |         |          |   |          |         |         |   |          |         |         |   |          |          |         |   |          |          |          |   |          |         |          |                                                                                                                                                                                                                                                                                                                                                                                                                                                                                                                                                                                                                                                                                                                                                                                                                                                       |         |         |         |         |         |         |         |         |         |          |          |          |          |          |          |          |          |          |          |          |          |          |          |          |          |          |          |          |          |          |          |          |          |          |          |          |
| C                                                                                                                                                                                                                                                                                                                                                                                                                                                                                                                                                                                                                                                                                                                                                                                                 | -1.76563                                                                            | -0.42235                                                                             | 1.03972  |   |   |   |          |          |          |   |          |         |          |   |          |         |          |   |          |         |         |   |          |         |         |   |          |          |         |   |          |          |          |   |          |         |          |                                                                                                                                                                                                                                                                                                                                                                                                                                                                                                                                                                                                                                                                                                                                                                                                                                                       |         |         |         |         |         |         |         |         |         |          |          |          |          |          |          |          |          |          |          |          |          |          |          |          |          |          |          |          |          |          |          |          |          |          |          |          |
| H                                                                                                                                                                                                                                                                                                                                                                                                                                                                                                                                                                                                                                                                                                                                                                                                 | -2.39021                                                                            | -0.09261                                                                             | -2.28537 |   |   |   |          |          |          |   |          |         |          |   |          |         |          |   |          |         |         |   |          |         |         |   |          |          |         |   |          |          |          |   |          |         |          |                                                                                                                                                                                                                                                                                                                                                                                                                                                                                                                                                                                                                                                                                                                                                                                                                                                       |         |         |         |         |         |         |         |         |         |          |          |          |          |          |          |          |          |          |          |          |          |          |          |          |          |          |          |          |          |          |          |          |          |          |          |          |
| H                                                                                                                                                                                                                                                                                                                                                                                                                                                                                                                                                                                                                                                                                                                                                                                                 | -4.33978                                                                            | 1.13443                                                                              | -1.39750 |   |   |   |          |          |          |   |          |         |          |   |          |         |          |   |          |         |         |   |          |         |         |   |          |          |         |   |          |          |          |   |          |         |          |                                                                                                                                                                                                                                                                                                                                                                                                                                                                                                                                                                                                                                                                                                                                                                                                                                                       |         |         |         |         |         |         |         |         |         |          |          |          |          |          |          |          |          |          |          |          |          |          |          |          |          |          |          |          |          |          |          |          |          |          |          |          |
| 13.8590                                                                                                                                                                                                                                                                                                                                                                                                                                                                                                                                                                                                                                                                                                                                                                                           | 21.6987                                                                             | 29.8109                                                                              |          |   |   |   |          |          |          |   |          |         |          |   |          |         |          |   |          |         |         |   |          |         |         |   |          |          |         |   |          |          |          |   |          |         |          |                                                                                                                                                                                                                                                                                                                                                                                                                                                                                                                                                                                                                                                                                                                                                                                                                                                       |         |         |         |         |         |         |         |         |         |          |          |          |          |          |          |          |          |          |          |          |          |          |          |          |          |          |          |          |          |          |          |          |          |          |          |          |
| 43.7489                                                                                                                                                                                                                                                                                                                                                                                                                                                                                                                                                                                                                                                                                                                                                                                           | 51.2559                                                                             | 52.9671                                                                              |          |   |   |   |          |          |          |   |          |         |          |   |          |         |          |   |          |         |         |   |          |         |         |   |          |          |         |   |          |          |          |   |          |         |          |                                                                                                                                                                                                                                                                                                                                                                                                                                                                                                                                                                                                                                                                                                                                                                                                                                                       |         |         |         |         |         |         |         |         |         |          |          |          |          |          |          |          |          |          |          |          |          |          |          |          |          |          |          |          |          |          |          |          |          |          |          |          |
| 54.4181                                                                                                                                                                                                                                                                                                                                                                                                                                                                                                                                                                                                                                                                                                                                                                                           | 66.1216                                                                             | 73.5237                                                                              |          |   |   |   |          |          |          |   |          |         |          |   |          |         |          |   |          |         |         |   |          |         |         |   |          |          |         |   |          |          |          |   |          |         |          |                                                                                                                                                                                                                                                                                                                                                                                                                                                                                                                                                                                                                                                                                                                                                                                                                                                       |         |         |         |         |         |         |         |         |         |          |          |          |          |          |          |          |          |          |          |          |          |          |          |          |          |          |          |          |          |          |          |          |          |          |          |          |
| 100.0022                                                                                                                                                                                                                                                                                                                                                                                                                                                                                                                                                                                                                                                                                                                                                                                          | 111.8898                                                                            | 126.4151                                                                             |          |   |   |   |          |          |          |   |          |         |          |   |          |         |          |   |          |         |         |   |          |         |         |   |          |          |         |   |          |          |          |   |          |         |          |                                                                                                                                                                                                                                                                                                                                                                                                                                                                                                                                                                                                                                                                                                                                                                                                                                                       |         |         |         |         |         |         |         |         |         |          |          |          |          |          |          |          |          |          |          |          |          |          |          |          |          |          |          |          |          |          |          |          |          |          |          |          |
| 141.0195                                                                                                                                                                                                                                                                                                                                                                                                                                                                                                                                                                                                                                                                                                                                                                                          | 164.0268                                                                            | 168.5883                                                                             |          |   |   |   |          |          |          |   |          |         |          |   |          |         |          |   |          |         |         |   |          |         |         |   |          |          |         |   |          |          |          |   |          |         |          |                                                                                                                                                                                                                                                                                                                                                                                                                                                                                                                                                                                                                                                                                                                                                                                                                                                       |         |         |         |         |         |         |         |         |         |          |          |          |          |          |          |          |          |          |          |          |          |          |          |          |          |          |          |          |          |          |          |          |          |          |          |          |
| 174.3953                                                                                                                                                                                                                                                                                                                                                                                                                                                                                                                                                                                                                                                                                                                                                                                          | 185.7569                                                                            | 210.0110                                                                             |          |   |   |   |          |          |          |   |          |         |          |   |          |         |          |   |          |         |         |   |          |         |         |   |          |          |         |   |          |          |          |   |          |         |          |                                                                                                                                                                                                                                                                                                                                                                                                                                                                                                                                                                                                                                                                                                                                                                                                                                                       |         |         |         |         |         |         |         |         |         |          |          |          |          |          |          |          |          |          |          |          |          |          |          |          |          |          |          |          |          |          |          |          |          |          |          |          |
| 221.6353                                                                                                                                                                                                                                                                                                                                                                                                                                                                                                                                                                                                                                                                                                                                                                                          | 242.6403                                                                            | 249.1870                                                                             |          |   |   |   |          |          |          |   |          |         |          |   |          |         |          |   |          |         |         |   |          |         |         |   |          |          |         |   |          |          |          |   |          |         |          |                                                                                                                                                                                                                                                                                                                                                                                                                                                                                                                                                                                                                                                                                                                                                                                                                                                       |         |         |         |         |         |         |         |         |         |          |          |          |          |          |          |          |          |          |          |          |          |          |          |          |          |          |          |          |          |          |          |          |          |          |          |          |
| 260.0494                                                                                                                                                                                                                                                                                                                                                                                                                                                                                                                                                                                                                                                                                                                                                                                          | 260.6001                                                                            | 265.5966                                                                             |          |   |   |   |          |          |          |   |          |         |          |   |          |         |          |   |          |         |         |   |          |         |         |   |          |          |         |   |          |          |          |   |          |         |          |                                                                                                                                                                                                                                                                                                                                                                                                                                                                                                                                                                                                                                                                                                                                                                                                                                                       |         |         |         |         |         |         |         |         |         |          |          |          |          |          |          |          |          |          |          |          |          |          |          |          |          |          |          |          |          |          |          |          |          |          |          |          |
| 276.5906                                                                                                                                                                                                                                                                                                                                                                                                                                                                                                                                                                                                                                                                                                                                                                                          | 284.2906                                                                            | 306.8324                                                                             |          |   |   |   |          |          |          |   |          |         |          |   |          |         |          |   |          |         |         |   |          |         |         |   |          |          |         |   |          |          |          |   |          |         |          |                                                                                                                                                                                                                                                                                                                                                                                                                                                                                                                                                                                                                                                                                                                                                                                                                                                       |         |         |         |         |         |         |         |         |         |          |          |          |          |          |          |          |          |          |          |          |          |          |          |          |          |          |          |          |          |          |          |          |          |          |          |          |
| 334.3540                                                                                                                                                                                                                                                                                                                                                                                                                                                                                                                                                                                                                                                                                                                                                                                          | 340.5225                                                                            | 345.2681                                                                             |          |   |   |   |          |          |          |   |          |         |          |   |          |         |          |   |          |         |         |   |          |         |         |   |          |          |         |   |          |          |          |   |          |         |          |                                                                                                                                                                                                                                                                                                                                                                                                                                                                                                                                                                                                                                                                                                                                                                                                                                                       |         |         |         |         |         |         |         |         |         |          |          |          |          |          |          |          |          |          |          |          |          |          |          |          |          |          |          |          |          |          |          |          |          |          |          |          |
| 352.4735                                                                                                                                                                                                                                                                                                                                                                                                                                                                                                                                                                                                                                                                                                                                                                                          | 384.5463                                                                            | 406.0712                                                                             |          |   |   |   |          |          |          |   |          |         |          |   |          |         |          |   |          |         |         |   |          |         |         |   |          |          |         |   |          |          |          |   |          |         |          |                                                                                                                                                                                                                                                                                                                                                                                                                                                                                                                                                                                                                                                                                                                                                                                                                                                       |         |         |         |         |         |         |         |         |         |          |          |          |          |          |          |          |          |          |          |          |          |          |          |          |          |          |          |          |          |          |          |          |          |          |          |          |
| 408.7349                                                                                                                                                                                                                                                                                                                                                                                                                                                                                                                                                                                                                                                                                                                                                                                          | 411.7528                                                                            | 412.0980                                                                             |          |   |   |   |          |          |          |   |          |         |          |   |          |         |          |   |          |         |         |   |          |         |         |   |          |          |         |   |          |          |          |   |          |         |          |                                                                                                                                                                                                                                                                                                                                                                                                                                                                                                                                                                                                                                                                                                                                                                                                                                                       |         |         |         |         |         |         |         |         |         |          |          |          |          |          |          |          |          |          |          |          |          |          |          |          |          |          |          |          |          |          |          |          |          |          |          |          |



|   |          |          |          |           |           |           |
|---|----------|----------|----------|-----------|-----------|-----------|
| H | -4.66217 | 1.36834  | 1.05868  | 424.4612  | 448.8902  | 450.3445  |
| H | -2.99515 | 0.36634  | 2.60360  | 457.4569  | 460.7631  | 462.7252  |
| H | -1.03067 | -0.85462 | 1.70814  | 478.0721  | 485.3086  | 486.9264  |
| N | -0.51656 | -1.28507 | -0.88411 | 491.7483  | 496.4871  | 538.0944  |
| H | -0.25577 | -0.96723 | -1.81517 | 538.6575  | 541.1601  | 559.1472  |
| N | 0.57640  | -1.50826 | -0.05795 | 584.3429  | 586.4228  | 594.2237  |
| H | 0.88139  | -2.47146 | -0.09771 | 595.4533  | 599.9621  | 620.8046  |
| C | 1.62013  | -0.56940 | -0.04146 | 626.7461  | 627.8044  | 634.7766  |
| C | 1.41369  | 0.75931  | -0.42515 | 669.3397  | 679.1563  | 688.5484  |
| C | 2.88666  | -0.96753 | 0.40461  | 689.7333  | 695.9964  | 711.9680  |
| C | 2.46743  | 1.66716  | -0.36071 | 715.3392  | 720.5725  | 724.5417  |
| H | 0.43200  | 1.08677  | -0.75014 | 741.3807  | 746.6094  | 752.4526  |
| C | 3.92626  | -0.05085 | 0.46366  | 758.5174  | 766.9519  | 770.3578  |
| H | 3.04766  | -1.99995 | 0.70430  | 776.3131  | 777.7222  | 798.6500  |
| C | 3.72640  | 1.27442  | 0.07975  | 815.9081  | 819.7943  | 823.4842  |
| H | 2.29337  | 2.69669  | -0.65803 | 831.7275  | 837.7028  | 853.8413  |
| H | 4.90254  | -0.37674 | 0.80875  | 855.8877  | 859.5682  | 861.7193  |
| H | 4.54117  | 1.98841  | 0.12634  | 863.8003  | 869.4410  | 871.5946  |
| C | 3.82628  | 1.39527  | -0.09170 | 876.0318  | 885.6000  | 889.1272  |
| C | 5.04592  | -0.71999 | -0.18079 | 906.8245  | 919.4596  | 935.4049  |
| C | 3.68573  | -2.85612 | -0.15703 | 941.9849  | 943.8943  | 952.4742  |
| H | 2.32963  | -4.51250 | -0.19077 | 976.3470  | 992.6945  | 999.9192  |
| C | 3.72116  | 2.82537  | -0.09574 | 1000.8722 | 1009.9472 | 1012.7800 |
| C | 5.04215  | 0.64935  | -0.16783 | 1014.6718 | 1018.0942 | 1018.7266 |
| C | 1.27913  | 2.64979  | 0.02889  | 1020.9429 | 1022.8299 | 1026.1217 |
| H | 5.97926  | -1.26824 | -0.25207 | 1030.8176 | 1038.1859 | 1044.7297 |
| H | 4.57397  | -3.47685 | -0.23081 | 1064.1628 | 1070.7059 | 1094.2018 |
| C | 2.50038  | 3.42118  | -0.03734 | 1120.1932 | 1124.1887 | 1134.8997 |
| H | 4.62414  | 3.42615  | -0.14688 | 1136.9034 | 1144.3050 | 1160.6501 |
| H | 5.97941  | 1.19435  | -0.22462 | 1170.9635 | 1175.7344 | 1184.3281 |
| H | 2.41296  | 4.50196  | -0.04125 | 1186.1010 | 1189.0500 | 1189.2915 |
| N | 1.39837  | -1.30919 | 0.06494  | 1193.8013 | 1208.9439 | 1219.7218 |
| N | 1.39857  | 1.30012  | 0.04294  | 1236.1211 | 1243.6319 | 1245.4956 |
| H | 0.19989  | 0.13900  | 1.59991  | 1248.8739 | 1256.6617 | 1259.6527 |
| C | -0.04820 | -3.26690 | -0.06233 | 1269.5910 | 1275.0380 | 1296.7983 |
| H | -0.03262 | -4.33522 | -0.25561 | 1302.3846 | 1316.4626 | 1330.6371 |
| C | 0.02703  | 3.28554  | 0.04759  | 1338.0585 | 1359.3442 | 1366.9219 |
| H | 0.03107  | 4.36759  | 0.00562  | 1371.3468 | 1379.7891 | 1394.8276 |
| H | -1.39197 | -1.36276 | 1.51537  | 1419.0913 | 1420.2671 | 1423.3410 |
|   |          |          |          | 1433.2388 | 1451.1087 | 1458.1572 |
|   |          |          |          | 1464.4183 | 1470.3051 | 1475.8165 |
|   |          |          |          | 1479.1964 | 1482.2937 | 1486.5779 |
|   |          |          |          | 1504.2688 | 1517.3412 | 1523.1595 |
|   |          |          |          | 1530.4814 | 1547.1382 | 1551.8148 |
|   |          |          |          | 1565.2113 | 1567.0639 | 1570.9207 |
|   |          |          |          | 1574.3565 | 1619.0529 | 1626.3758 |
|   |          |          |          | 1635.8293 | 1656.9772 | 1679.7065 |
|   |          |          |          | 1689.2942 | 1696.0447 | 1697.3257 |
|   |          |          |          | 1699.0933 | 1702.3447 | 1708.4213 |
|   |          |          |          | 1709.8851 | 1719.1066 | 2080.0312 |
|   |          |          |          | 3176.2483 | 3189.9796 | 3198.9804 |
|   |          |          |          | 3202.2314 | 3210.7064 | 3211.0449 |
|   |          |          |          | 3212.7904 | 3216.0270 | 3218.7192 |
|   |          |          |          | 3219.6730 | 3226.5884 | 3227.4556 |
|   |          |          |          | 3227.9574 | 3228.3947 | 3231.7680 |

|  |           |           |           |
|--|-----------|-----------|-----------|
|  | 3235.4189 | 3235.5952 | 3237.7010 |
|  | 3239.3072 | 3240.0382 | 3241.1471 |
|  | 3244.4618 | 3244.5604 | 3252.5999 |
|  | 3265.4405 | 3426.3812 | 3439.9461 |

### Statistical Thermodynamic Analysis

|                                        |                                                |
|----------------------------------------|------------------------------------------------|
| Temperature = 353.15 K                 | Pressure = 1 atm                               |
| Zero-point correction = 0.582679       | Electronic Energy = -1937.63840114             |
| Internal Energy (E) = -1937.00980714   | Enthalpy (H) = -1937.00868914                  |
| Gibbs Free Energy (G) = -1937.13818814 | Gibbs Free Energy of Solvation = -1937.1969452 |

| St. Point                | General Structure                                                                                                                                                                                                                                                                                                                                                                                                                                                                                                                                                                                                                                                                                                                                                                                                                                                                                                                                                                                                                                                                                                                                                                                                                                                                                                                                                                                                                                                                                                                                                                                                                                                                                                      | Ball & Stick model                                                                  |          |   |   |   |          |          |          |   |          |         |          |   |          |         |          |   |          |         |         |   |          |         |         |   |          |          |         |   |          |          |          |   |          |         |          |   |          |         |         |   |          |         |         |   |          |          |         |   |          |          |          |   |          |          |          |   |         |          |          |   |         |          |          |   |         |          |          |   |         |         |          |   |         |          |         |   |         |         |          |   |         |         |          |   |         |          |         |                                                                                                                                                                                                                                                                                                                                                                                                                                                                                                                                                                                                                                                                                                                                                                                                                                                                                                                                                                                                                                                                                                                                                                                                                                                                                                                                                                                                                                                                                                                                                                                                                                                                                |           |         |         |         |         |         |         |         |         |         |         |          |          |          |          |          |          |          |          |          |          |          |          |          |          |          |          |          |          |          |          |          |          |          |          |          |          |          |          |          |          |          |          |          |          |          |          |          |          |          |          |          |          |          |          |          |          |          |          |          |          |          |          |          |          |          |          |          |          |          |          |          |          |          |          |
|--------------------------|------------------------------------------------------------------------------------------------------------------------------------------------------------------------------------------------------------------------------------------------------------------------------------------------------------------------------------------------------------------------------------------------------------------------------------------------------------------------------------------------------------------------------------------------------------------------------------------------------------------------------------------------------------------------------------------------------------------------------------------------------------------------------------------------------------------------------------------------------------------------------------------------------------------------------------------------------------------------------------------------------------------------------------------------------------------------------------------------------------------------------------------------------------------------------------------------------------------------------------------------------------------------------------------------------------------------------------------------------------------------------------------------------------------------------------------------------------------------------------------------------------------------------------------------------------------------------------------------------------------------------------------------------------------------------------------------------------------------|-------------------------------------------------------------------------------------|----------|---|---|---|----------|----------|----------|---|----------|---------|----------|---|----------|---------|----------|---|----------|---------|---------|---|----------|---------|---------|---|----------|----------|---------|---|----------|----------|----------|---|----------|---------|----------|---|----------|---------|---------|---|----------|---------|---------|---|----------|----------|---------|---|----------|----------|----------|---|----------|----------|----------|---|---------|----------|----------|---|---------|----------|----------|---|---------|----------|----------|---|---------|---------|----------|---|---------|----------|---------|---|---------|---------|----------|---|---------|---------|----------|---|---------|----------|---------|--------------------------------------------------------------------------------------------------------------------------------------------------------------------------------------------------------------------------------------------------------------------------------------------------------------------------------------------------------------------------------------------------------------------------------------------------------------------------------------------------------------------------------------------------------------------------------------------------------------------------------------------------------------------------------------------------------------------------------------------------------------------------------------------------------------------------------------------------------------------------------------------------------------------------------------------------------------------------------------------------------------------------------------------------------------------------------------------------------------------------------------------------------------------------------------------------------------------------------------------------------------------------------------------------------------------------------------------------------------------------------------------------------------------------------------------------------------------------------------------------------------------------------------------------------------------------------------------------------------------------------------------------------------------------------|-----------|---------|---------|---------|---------|---------|---------|---------|---------|---------|---------|----------|----------|----------|----------|----------|----------|----------|----------|----------|----------|----------|----------|----------|----------|----------|----------|----------|----------|----------|----------|----------|----------|----------|----------|----------|----------|----------|----------|----------|----------|----------|----------|----------|----------|----------|----------|----------|----------|----------|----------|----------|----------|----------|----------|----------|----------|----------|----------|----------|----------|----------|----------|----------|----------|----------|----------|----------|----------|----------|----------|----------|----------|----------|----------|
| TS2 <sup>Hyd2(MLC)</sup> | 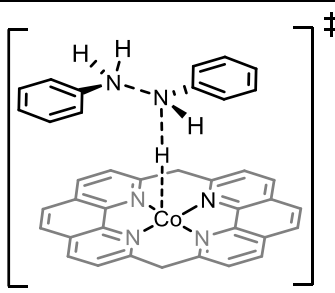                                                                                                                                                                                                                                                                                                                                                                                                                                                                                                                                                                                                                                                                                                                                                                                                                                                                                                                                                                                                                                                                                                                                                                                                                                                                                                                                                                                                                                                                                                                                                                                                                                     |  |          |   |   |   |          |          |          |   |          |         |          |   |          |         |          |   |          |         |         |   |          |         |         |   |          |          |         |   |          |          |          |   |          |         |          |   |          |         |         |   |          |         |         |   |          |          |         |   |          |          |          |   |          |          |          |   |         |          |          |   |         |          |          |   |         |          |          |   |         |         |          |   |         |          |         |   |         |         |          |   |         |         |          |   |         |          |         |                                                                                                                                                                                                                                                                                                                                                                                                                                                                                                                                                                                                                                                                                                                                                                                                                                                                                                                                                                                                                                                                                                                                                                                                                                                                                                                                                                                                                                                                                                                                                                                                                                                                                |           |         |         |         |         |         |         |         |         |         |         |          |          |          |          |          |          |          |          |          |          |          |          |          |          |          |          |          |          |          |          |          |          |          |          |          |          |          |          |          |          |          |          |          |          |          |          |          |          |          |          |          |          |          |          |          |          |          |          |          |          |          |          |          |          |          |          |          |          |          |          |          |          |          |          |
|                          | <p style="text-align: center;"><b>Cartesian coordinate</b></p> <hr/> <table border="1"> <thead> <tr> <th>Atoms</th> <th>X</th> <th>Y</th> <th>Z</th> </tr> </thead> <tbody> <tr><td>C</td><td>-1.59132</td><td>-0.55569</td><td>-0.33936</td></tr> <tr><td>C</td><td>-2.52583</td><td>0.01320</td><td>-1.21175</td></tr> <tr><td>C</td><td>-3.62311</td><td>0.69949</td><td>-0.70773</td></tr> <tr><td>C</td><td>-3.80531</td><td>0.83130</td><td>0.66686</td></tr> <tr><td>C</td><td>-2.86991</td><td>0.26676</td><td>1.52963</td></tr> <tr><td>C</td><td>-1.76563</td><td>-0.42235</td><td>1.03972</td></tr> <tr><td>H</td><td>-2.39021</td><td>-0.09261</td><td>-2.28537</td></tr> <tr><td>H</td><td>-4.33978</td><td>1.13443</td><td>-1.39750</td></tr> <tr><td>H</td><td>-4.66217</td><td>1.36834</td><td>1.05868</td></tr> <tr><td>H</td><td>-2.99515</td><td>0.36634</td><td>2.60360</td></tr> <tr><td>H</td><td>-1.03067</td><td>-0.85462</td><td>1.70814</td></tr> <tr><td>N</td><td>-0.51656</td><td>-1.28507</td><td>-0.88411</td></tr> <tr><td>H</td><td>-0.25577</td><td>-0.96723</td><td>-1.81517</td></tr> <tr><td>N</td><td>0.57640</td><td>-1.50826</td><td>-0.05795</td></tr> <tr><td>H</td><td>0.88139</td><td>-2.47146</td><td>-0.09771</td></tr> <tr><td>C</td><td>1.62013</td><td>-0.56940</td><td>-0.04146</td></tr> <tr><td>C</td><td>1.41369</td><td>0.75931</td><td>-0.42515</td></tr> <tr><td>C</td><td>2.88666</td><td>-0.96753</td><td>0.40461</td></tr> <tr><td>C</td><td>2.46743</td><td>1.66716</td><td>-0.36071</td></tr> <tr><td>H</td><td>0.43200</td><td>1.08677</td><td>-0.75014</td></tr> <tr><td>C</td><td>3.92626</td><td>-0.05085</td><td>0.46366</td></tr> </tbody> </table> | Atoms                                                                               | X        | Y | Z | C | -1.59132 | -0.55569 | -0.33936 | C | -2.52583 | 0.01320 | -1.21175 | C | -3.62311 | 0.69949 | -0.70773 | C | -3.80531 | 0.83130 | 0.66686 | C | -2.86991 | 0.26676 | 1.52963 | C | -1.76563 | -0.42235 | 1.03972 | H | -2.39021 | -0.09261 | -2.28537 | H | -4.33978 | 1.13443 | -1.39750 | H | -4.66217 | 1.36834 | 1.05868 | H | -2.99515 | 0.36634 | 2.60360 | H | -1.03067 | -0.85462 | 1.70814 | N | -0.51656 | -1.28507 | -0.88411 | H | -0.25577 | -0.96723 | -1.81517 | N | 0.57640 | -1.50826 | -0.05795 | H | 0.88139 | -2.47146 | -0.09771 | C | 1.62013 | -0.56940 | -0.04146 | C | 1.41369 | 0.75931 | -0.42515 | C | 2.88666 | -0.96753 | 0.40461 | C | 2.46743 | 1.66716 | -0.36071 | H | 0.43200 | 1.08677 | -0.75014 | C | 3.92626 | -0.05085 | 0.46366 | <p style="text-align: center;"><b>Frequencies</b></p> <table border="1"> <tbody> <tr><td>-499.0177</td><td>16.7566</td><td>27.2179</td></tr> <tr><td>35.3179</td><td>38.0863</td><td>55.6009</td></tr> <tr><td>59.3574</td><td>69.6039</td><td>71.9292</td></tr> <tr><td>79.7597</td><td>95.2402</td><td>112.7508</td></tr> <tr><td>123.4325</td><td>134.2896</td><td>138.4214</td></tr> <tr><td>163.0025</td><td>166.2698</td><td>178.7245</td></tr> <tr><td>218.2390</td><td>242.2081</td><td>249.8588</td></tr> <tr><td>255.7511</td><td>259.8201</td><td>262.2089</td></tr> <tr><td>271.1953</td><td>282.4510</td><td>308.5209</td></tr> <tr><td>312.7484</td><td>338.5479</td><td>340.9584</td></tr> <tr><td>352.9684</td><td>377.7556</td><td>382.4435</td></tr> <tr><td>405.7619</td><td>407.7913</td><td>410.1227</td></tr> <tr><td>416.9960</td><td>430.5540</td><td>447.6063</td></tr> <tr><td>452.3514</td><td>462.0510</td><td>465.3520</td></tr> <tr><td>477.5259</td><td>485.7550</td><td>486.6900</td></tr> <tr><td>492.3731</td><td>494.3883</td><td>519.3630</td></tr> <tr><td>521.3696</td><td>534.0071</td><td>536.7446</td></tr> <tr><td>556.4665</td><td>559.3537</td><td>584.3102</td></tr> <tr><td>586.4664</td><td>594.4209</td><td>597.3468</td></tr> <tr><td>599.0122</td><td>625.2058</td><td>626.4752</td></tr> <tr><td>627.2099</td><td>677.9859</td><td>679.8313</td></tr> <tr><td>688.0898</td><td>689.9285</td><td>702.9933</td></tr> <tr><td>708.4435</td><td>713.9684</td><td>716.2347</td></tr> <tr><td>722.1583</td><td>734.7514</td><td>746.1621</td></tr> <tr><td>749.0459</td><td>759.4791</td><td>766.5835</td></tr> </tbody> </table> | -499.0177 | 16.7566 | 27.2179 | 35.3179 | 38.0863 | 55.6009 | 59.3574 | 69.6039 | 71.9292 | 79.7597 | 95.2402 | 112.7508 | 123.4325 | 134.2896 | 138.4214 | 163.0025 | 166.2698 | 178.7245 | 218.2390 | 242.2081 | 249.8588 | 255.7511 | 259.8201 | 262.2089 | 271.1953 | 282.4510 | 308.5209 | 312.7484 | 338.5479 | 340.9584 | 352.9684 | 377.7556 | 382.4435 | 405.7619 | 407.7913 | 410.1227 | 416.9960 | 430.5540 | 447.6063 | 452.3514 | 462.0510 | 465.3520 | 477.5259 | 485.7550 | 486.6900 | 492.3731 | 494.3883 | 519.3630 | 521.3696 | 534.0071 | 536.7446 | 556.4665 | 559.3537 | 584.3102 | 586.4664 | 594.4209 | 597.3468 | 599.0122 | 625.2058 | 626.4752 | 627.2099 | 677.9859 | 679.8313 | 688.0898 | 689.9285 | 702.9933 | 708.4435 | 713.9684 | 716.2347 | 722.1583 | 734.7514 | 746.1621 | 749.0459 | 759.4791 | 766.5835 |
| Atoms                    | X                                                                                                                                                                                                                                                                                                                                                                                                                                                                                                                                                                                                                                                                                                                                                                                                                                                                                                                                                                                                                                                                                                                                                                                                                                                                                                                                                                                                                                                                                                                                                                                                                                                                                                                      | Y                                                                                   | Z        |   |   |   |          |          |          |   |          |         |          |   |          |         |          |   |          |         |         |   |          |         |         |   |          |          |         |   |          |          |          |   |          |         |          |   |          |         |         |   |          |         |         |   |          |          |         |   |          |          |          |   |          |          |          |   |         |          |          |   |         |          |          |   |         |          |          |   |         |         |          |   |         |          |         |   |         |         |          |   |         |         |          |   |         |          |         |                                                                                                                                                                                                                                                                                                                                                                                                                                                                                                                                                                                                                                                                                                                                                                                                                                                                                                                                                                                                                                                                                                                                                                                                                                                                                                                                                                                                                                                                                                                                                                                                                                                                                |           |         |         |         |         |         |         |         |         |         |         |          |          |          |          |          |          |          |          |          |          |          |          |          |          |          |          |          |          |          |          |          |          |          |          |          |          |          |          |          |          |          |          |          |          |          |          |          |          |          |          |          |          |          |          |          |          |          |          |          |          |          |          |          |          |          |          |          |          |          |          |          |          |          |          |
| C                        | -1.59132                                                                                                                                                                                                                                                                                                                                                                                                                                                                                                                                                                                                                                                                                                                                                                                                                                                                                                                                                                                                                                                                                                                                                                                                                                                                                                                                                                                                                                                                                                                                                                                                                                                                                                               | -0.55569                                                                            | -0.33936 |   |   |   |          |          |          |   |          |         |          |   |          |         |          |   |          |         |         |   |          |         |         |   |          |          |         |   |          |          |          |   |          |         |          |   |          |         |         |   |          |         |         |   |          |          |         |   |          |          |          |   |          |          |          |   |         |          |          |   |         |          |          |   |         |          |          |   |         |         |          |   |         |          |         |   |         |         |          |   |         |         |          |   |         |          |         |                                                                                                                                                                                                                                                                                                                                                                                                                                                                                                                                                                                                                                                                                                                                                                                                                                                                                                                                                                                                                                                                                                                                                                                                                                                                                                                                                                                                                                                                                                                                                                                                                                                                                |           |         |         |         |         |         |         |         |         |         |         |          |          |          |          |          |          |          |          |          |          |          |          |          |          |          |          |          |          |          |          |          |          |          |          |          |          |          |          |          |          |          |          |          |          |          |          |          |          |          |          |          |          |          |          |          |          |          |          |          |          |          |          |          |          |          |          |          |          |          |          |          |          |          |          |
| C                        | -2.52583                                                                                                                                                                                                                                                                                                                                                                                                                                                                                                                                                                                                                                                                                                                                                                                                                                                                                                                                                                                                                                                                                                                                                                                                                                                                                                                                                                                                                                                                                                                                                                                                                                                                                                               | 0.01320                                                                             | -1.21175 |   |   |   |          |          |          |   |          |         |          |   |          |         |          |   |          |         |         |   |          |         |         |   |          |          |         |   |          |          |          |   |          |         |          |   |          |         |         |   |          |         |         |   |          |          |         |   |          |          |          |   |          |          |          |   |         |          |          |   |         |          |          |   |         |          |          |   |         |         |          |   |         |          |         |   |         |         |          |   |         |         |          |   |         |          |         |                                                                                                                                                                                                                                                                                                                                                                                                                                                                                                                                                                                                                                                                                                                                                                                                                                                                                                                                                                                                                                                                                                                                                                                                                                                                                                                                                                                                                                                                                                                                                                                                                                                                                |           |         |         |         |         |         |         |         |         |         |         |          |          |          |          |          |          |          |          |          |          |          |          |          |          |          |          |          |          |          |          |          |          |          |          |          |          |          |          |          |          |          |          |          |          |          |          |          |          |          |          |          |          |          |          |          |          |          |          |          |          |          |          |          |          |          |          |          |          |          |          |          |          |          |          |
| C                        | -3.62311                                                                                                                                                                                                                                                                                                                                                                                                                                                                                                                                                                                                                                                                                                                                                                                                                                                                                                                                                                                                                                                                                                                                                                                                                                                                                                                                                                                                                                                                                                                                                                                                                                                                                                               | 0.69949                                                                             | -0.70773 |   |   |   |          |          |          |   |          |         |          |   |          |         |          |   |          |         |         |   |          |         |         |   |          |          |         |   |          |          |          |   |          |         |          |   |          |         |         |   |          |         |         |   |          |          |         |   |          |          |          |   |          |          |          |   |         |          |          |   |         |          |          |   |         |          |          |   |         |         |          |   |         |          |         |   |         |         |          |   |         |         |          |   |         |          |         |                                                                                                                                                                                                                                                                                                                                                                                                                                                                                                                                                                                                                                                                                                                                                                                                                                                                                                                                                                                                                                                                                                                                                                                                                                                                                                                                                                                                                                                                                                                                                                                                                                                                                |           |         |         |         |         |         |         |         |         |         |         |          |          |          |          |          |          |          |          |          |          |          |          |          |          |          |          |          |          |          |          |          |          |          |          |          |          |          |          |          |          |          |          |          |          |          |          |          |          |          |          |          |          |          |          |          |          |          |          |          |          |          |          |          |          |          |          |          |          |          |          |          |          |          |          |
| C                        | -3.80531                                                                                                                                                                                                                                                                                                                                                                                                                                                                                                                                                                                                                                                                                                                                                                                                                                                                                                                                                                                                                                                                                                                                                                                                                                                                                                                                                                                                                                                                                                                                                                                                                                                                                                               | 0.83130                                                                             | 0.66686  |   |   |   |          |          |          |   |          |         |          |   |          |         |          |   |          |         |         |   |          |         |         |   |          |          |         |   |          |          |          |   |          |         |          |   |          |         |         |   |          |         |         |   |          |          |         |   |          |          |          |   |          |          |          |   |         |          |          |   |         |          |          |   |         |          |          |   |         |         |          |   |         |          |         |   |         |         |          |   |         |         |          |   |         |          |         |                                                                                                                                                                                                                                                                                                                                                                                                                                                                                                                                                                                                                                                                                                                                                                                                                                                                                                                                                                                                                                                                                                                                                                                                                                                                                                                                                                                                                                                                                                                                                                                                                                                                                |           |         |         |         |         |         |         |         |         |         |         |          |          |          |          |          |          |          |          |          |          |          |          |          |          |          |          |          |          |          |          |          |          |          |          |          |          |          |          |          |          |          |          |          |          |          |          |          |          |          |          |          |          |          |          |          |          |          |          |          |          |          |          |          |          |          |          |          |          |          |          |          |          |          |          |
| C                        | -2.86991                                                                                                                                                                                                                                                                                                                                                                                                                                                                                                                                                                                                                                                                                                                                                                                                                                                                                                                                                                                                                                                                                                                                                                                                                                                                                                                                                                                                                                                                                                                                                                                                                                                                                                               | 0.26676                                                                             | 1.52963  |   |   |   |          |          |          |   |          |         |          |   |          |         |          |   |          |         |         |   |          |         |         |   |          |          |         |   |          |          |          |   |          |         |          |   |          |         |         |   |          |         |         |   |          |          |         |   |          |          |          |   |          |          |          |   |         |          |          |   |         |          |          |   |         |          |          |   |         |         |          |   |         |          |         |   |         |         |          |   |         |         |          |   |         |          |         |                                                                                                                                                                                                                                                                                                                                                                                                                                                                                                                                                                                                                                                                                                                                                                                                                                                                                                                                                                                                                                                                                                                                                                                                                                                                                                                                                                                                                                                                                                                                                                                                                                                                                |           |         |         |         |         |         |         |         |         |         |         |          |          |          |          |          |          |          |          |          |          |          |          |          |          |          |          |          |          |          |          |          |          |          |          |          |          |          |          |          |          |          |          |          |          |          |          |          |          |          |          |          |          |          |          |          |          |          |          |          |          |          |          |          |          |          |          |          |          |          |          |          |          |          |          |
| C                        | -1.76563                                                                                                                                                                                                                                                                                                                                                                                                                                                                                                                                                                                                                                                                                                                                                                                                                                                                                                                                                                                                                                                                                                                                                                                                                                                                                                                                                                                                                                                                                                                                                                                                                                                                                                               | -0.42235                                                                            | 1.03972  |   |   |   |          |          |          |   |          |         |          |   |          |         |          |   |          |         |         |   |          |         |         |   |          |          |         |   |          |          |          |   |          |         |          |   |          |         |         |   |          |         |         |   |          |          |         |   |          |          |          |   |          |          |          |   |         |          |          |   |         |          |          |   |         |          |          |   |         |         |          |   |         |          |         |   |         |         |          |   |         |         |          |   |         |          |         |                                                                                                                                                                                                                                                                                                                                                                                                                                                                                                                                                                                                                                                                                                                                                                                                                                                                                                                                                                                                                                                                                                                                                                                                                                                                                                                                                                                                                                                                                                                                                                                                                                                                                |           |         |         |         |         |         |         |         |         |         |         |          |          |          |          |          |          |          |          |          |          |          |          |          |          |          |          |          |          |          |          |          |          |          |          |          |          |          |          |          |          |          |          |          |          |          |          |          |          |          |          |          |          |          |          |          |          |          |          |          |          |          |          |          |          |          |          |          |          |          |          |          |          |          |          |
| H                        | -2.39021                                                                                                                                                                                                                                                                                                                                                                                                                                                                                                                                                                                                                                                                                                                                                                                                                                                                                                                                                                                                                                                                                                                                                                                                                                                                                                                                                                                                                                                                                                                                                                                                                                                                                                               | -0.09261                                                                            | -2.28537 |   |   |   |          |          |          |   |          |         |          |   |          |         |          |   |          |         |         |   |          |         |         |   |          |          |         |   |          |          |          |   |          |         |          |   |          |         |         |   |          |         |         |   |          |          |         |   |          |          |          |   |          |          |          |   |         |          |          |   |         |          |          |   |         |          |          |   |         |         |          |   |         |          |         |   |         |         |          |   |         |         |          |   |         |          |         |                                                                                                                                                                                                                                                                                                                                                                                                                                                                                                                                                                                                                                                                                                                                                                                                                                                                                                                                                                                                                                                                                                                                                                                                                                                                                                                                                                                                                                                                                                                                                                                                                                                                                |           |         |         |         |         |         |         |         |         |         |         |          |          |          |          |          |          |          |          |          |          |          |          |          |          |          |          |          |          |          |          |          |          |          |          |          |          |          |          |          |          |          |          |          |          |          |          |          |          |          |          |          |          |          |          |          |          |          |          |          |          |          |          |          |          |          |          |          |          |          |          |          |          |          |          |
| H                        | -4.33978                                                                                                                                                                                                                                                                                                                                                                                                                                                                                                                                                                                                                                                                                                                                                                                                                                                                                                                                                                                                                                                                                                                                                                                                                                                                                                                                                                                                                                                                                                                                                                                                                                                                                                               | 1.13443                                                                             | -1.39750 |   |   |   |          |          |          |   |          |         |          |   |          |         |          |   |          |         |         |   |          |         |         |   |          |          |         |   |          |          |          |   |          |         |          |   |          |         |         |   |          |         |         |   |          |          |         |   |          |          |          |   |          |          |          |   |         |          |          |   |         |          |          |   |         |          |          |   |         |         |          |   |         |          |         |   |         |         |          |   |         |         |          |   |         |          |         |                                                                                                                                                                                                                                                                                                                                                                                                                                                                                                                                                                                                                                                                                                                                                                                                                                                                                                                                                                                                                                                                                                                                                                                                                                                                                                                                                                                                                                                                                                                                                                                                                                                                                |           |         |         |         |         |         |         |         |         |         |         |          |          |          |          |          |          |          |          |          |          |          |          |          |          |          |          |          |          |          |          |          |          |          |          |          |          |          |          |          |          |          |          |          |          |          |          |          |          |          |          |          |          |          |          |          |          |          |          |          |          |          |          |          |          |          |          |          |          |          |          |          |          |          |          |
| H                        | -4.66217                                                                                                                                                                                                                                                                                                                                                                                                                                                                                                                                                                                                                                                                                                                                                                                                                                                                                                                                                                                                                                                                                                                                                                                                                                                                                                                                                                                                                                                                                                                                                                                                                                                                                                               | 1.36834                                                                             | 1.05868  |   |   |   |          |          |          |   |          |         |          |   |          |         |          |   |          |         |         |   |          |         |         |   |          |          |         |   |          |          |          |   |          |         |          |   |          |         |         |   |          |         |         |   |          |          |         |   |          |          |          |   |          |          |          |   |         |          |          |   |         |          |          |   |         |          |          |   |         |         |          |   |         |          |         |   |         |         |          |   |         |         |          |   |         |          |         |                                                                                                                                                                                                                                                                                                                                                                                                                                                                                                                                                                                                                                                                                                                                                                                                                                                                                                                                                                                                                                                                                                                                                                                                                                                                                                                                                                                                                                                                                                                                                                                                                                                                                |           |         |         |         |         |         |         |         |         |         |         |          |          |          |          |          |          |          |          |          |          |          |          |          |          |          |          |          |          |          |          |          |          |          |          |          |          |          |          |          |          |          |          |          |          |          |          |          |          |          |          |          |          |          |          |          |          |          |          |          |          |          |          |          |          |          |          |          |          |          |          |          |          |          |          |
| H                        | -2.99515                                                                                                                                                                                                                                                                                                                                                                                                                                                                                                                                                                                                                                                                                                                                                                                                                                                                                                                                                                                                                                                                                                                                                                                                                                                                                                                                                                                                                                                                                                                                                                                                                                                                                                               | 0.36634                                                                             | 2.60360  |   |   |   |          |          |          |   |          |         |          |   |          |         |          |   |          |         |         |   |          |         |         |   |          |          |         |   |          |          |          |   |          |         |          |   |          |         |         |   |          |         |         |   |          |          |         |   |          |          |          |   |          |          |          |   |         |          |          |   |         |          |          |   |         |          |          |   |         |         |          |   |         |          |         |   |         |         |          |   |         |         |          |   |         |          |         |                                                                                                                                                                                                                                                                                                                                                                                                                                                                                                                                                                                                                                                                                                                                                                                                                                                                                                                                                                                                                                                                                                                                                                                                                                                                                                                                                                                                                                                                                                                                                                                                                                                                                |           |         |         |         |         |         |         |         |         |         |         |          |          |          |          |          |          |          |          |          |          |          |          |          |          |          |          |          |          |          |          |          |          |          |          |          |          |          |          |          |          |          |          |          |          |          |          |          |          |          |          |          |          |          |          |          |          |          |          |          |          |          |          |          |          |          |          |          |          |          |          |          |          |          |          |
| H                        | -1.03067                                                                                                                                                                                                                                                                                                                                                                                                                                                                                                                                                                                                                                                                                                                                                                                                                                                                                                                                                                                                                                                                                                                                                                                                                                                                                                                                                                                                                                                                                                                                                                                                                                                                                                               | -0.85462                                                                            | 1.70814  |   |   |   |          |          |          |   |          |         |          |   |          |         |          |   |          |         |         |   |          |         |         |   |          |          |         |   |          |          |          |   |          |         |          |   |          |         |         |   |          |         |         |   |          |          |         |   |          |          |          |   |          |          |          |   |         |          |          |   |         |          |          |   |         |          |          |   |         |         |          |   |         |          |         |   |         |         |          |   |         |         |          |   |         |          |         |                                                                                                                                                                                                                                                                                                                                                                                                                                                                                                                                                                                                                                                                                                                                                                                                                                                                                                                                                                                                                                                                                                                                                                                                                                                                                                                                                                                                                                                                                                                                                                                                                                                                                |           |         |         |         |         |         |         |         |         |         |         |          |          |          |          |          |          |          |          |          |          |          |          |          |          |          |          |          |          |          |          |          |          |          |          |          |          |          |          |          |          |          |          |          |          |          |          |          |          |          |          |          |          |          |          |          |          |          |          |          |          |          |          |          |          |          |          |          |          |          |          |          |          |          |          |
| N                        | -0.51656                                                                                                                                                                                                                                                                                                                                                                                                                                                                                                                                                                                                                                                                                                                                                                                                                                                                                                                                                                                                                                                                                                                                                                                                                                                                                                                                                                                                                                                                                                                                                                                                                                                                                                               | -1.28507                                                                            | -0.88411 |   |   |   |          |          |          |   |          |         |          |   |          |         |          |   |          |         |         |   |          |         |         |   |          |          |         |   |          |          |          |   |          |         |          |   |          |         |         |   |          |         |         |   |          |          |         |   |          |          |          |   |          |          |          |   |         |          |          |   |         |          |          |   |         |          |          |   |         |         |          |   |         |          |         |   |         |         |          |   |         |         |          |   |         |          |         |                                                                                                                                                                                                                                                                                                                                                                                                                                                                                                                                                                                                                                                                                                                                                                                                                                                                                                                                                                                                                                                                                                                                                                                                                                                                                                                                                                                                                                                                                                                                                                                                                                                                                |           |         |         |         |         |         |         |         |         |         |         |          |          |          |          |          |          |          |          |          |          |          |          |          |          |          |          |          |          |          |          |          |          |          |          |          |          |          |          |          |          |          |          |          |          |          |          |          |          |          |          |          |          |          |          |          |          |          |          |          |          |          |          |          |          |          |          |          |          |          |          |          |          |          |          |
| H                        | -0.25577                                                                                                                                                                                                                                                                                                                                                                                                                                                                                                                                                                                                                                                                                                                                                                                                                                                                                                                                                                                                                                                                                                                                                                                                                                                                                                                                                                                                                                                                                                                                                                                                                                                                                                               | -0.96723                                                                            | -1.81517 |   |   |   |          |          |          |   |          |         |          |   |          |         |          |   |          |         |         |   |          |         |         |   |          |          |         |   |          |          |          |   |          |         |          |   |          |         |         |   |          |         |         |   |          |          |         |   |          |          |          |   |          |          |          |   |         |          |          |   |         |          |          |   |         |          |          |   |         |         |          |   |         |          |         |   |         |         |          |   |         |         |          |   |         |          |         |                                                                                                                                                                                                                                                                                                                                                                                                                                                                                                                                                                                                                                                                                                                                                                                                                                                                                                                                                                                                                                                                                                                                                                                                                                                                                                                                                                                                                                                                                                                                                                                                                                                                                |           |         |         |         |         |         |         |         |         |         |         |          |          |          |          |          |          |          |          |          |          |          |          |          |          |          |          |          |          |          |          |          |          |          |          |          |          |          |          |          |          |          |          |          |          |          |          |          |          |          |          |          |          |          |          |          |          |          |          |          |          |          |          |          |          |          |          |          |          |          |          |          |          |          |          |
| N                        | 0.57640                                                                                                                                                                                                                                                                                                                                                                                                                                                                                                                                                                                                                                                                                                                                                                                                                                                                                                                                                                                                                                                                                                                                                                                                                                                                                                                                                                                                                                                                                                                                                                                                                                                                                                                | -1.50826                                                                            | -0.05795 |   |   |   |          |          |          |   |          |         |          |   |          |         |          |   |          |         |         |   |          |         |         |   |          |          |         |   |          |          |          |   |          |         |          |   |          |         |         |   |          |         |         |   |          |          |         |   |          |          |          |   |          |          |          |   |         |          |          |   |         |          |          |   |         |          |          |   |         |         |          |   |         |          |         |   |         |         |          |   |         |         |          |   |         |          |         |                                                                                                                                                                                                                                                                                                                                                                                                                                                                                                                                                                                                                                                                                                                                                                                                                                                                                                                                                                                                                                                                                                                                                                                                                                                                                                                                                                                                                                                                                                                                                                                                                                                                                |           |         |         |         |         |         |         |         |         |         |         |          |          |          |          |          |          |          |          |          |          |          |          |          |          |          |          |          |          |          |          |          |          |          |          |          |          |          |          |          |          |          |          |          |          |          |          |          |          |          |          |          |          |          |          |          |          |          |          |          |          |          |          |          |          |          |          |          |          |          |          |          |          |          |          |
| H                        | 0.88139                                                                                                                                                                                                                                                                                                                                                                                                                                                                                                                                                                                                                                                                                                                                                                                                                                                                                                                                                                                                                                                                                                                                                                                                                                                                                                                                                                                                                                                                                                                                                                                                                                                                                                                | -2.47146                                                                            | -0.09771 |   |   |   |          |          |          |   |          |         |          |   |          |         |          |   |          |         |         |   |          |         |         |   |          |          |         |   |          |          |          |   |          |         |          |   |          |         |         |   |          |         |         |   |          |          |         |   |          |          |          |   |          |          |          |   |         |          |          |   |         |          |          |   |         |          |          |   |         |         |          |   |         |          |         |   |         |         |          |   |         |         |          |   |         |          |         |                                                                                                                                                                                                                                                                                                                                                                                                                                                                                                                                                                                                                                                                                                                                                                                                                                                                                                                                                                                                                                                                                                                                                                                                                                                                                                                                                                                                                                                                                                                                                                                                                                                                                |           |         |         |         |         |         |         |         |         |         |         |          |          |          |          |          |          |          |          |          |          |          |          |          |          |          |          |          |          |          |          |          |          |          |          |          |          |          |          |          |          |          |          |          |          |          |          |          |          |          |          |          |          |          |          |          |          |          |          |          |          |          |          |          |          |          |          |          |          |          |          |          |          |          |          |
| C                        | 1.62013                                                                                                                                                                                                                                                                                                                                                                                                                                                                                                                                                                                                                                                                                                                                                                                                                                                                                                                                                                                                                                                                                                                                                                                                                                                                                                                                                                                                                                                                                                                                                                                                                                                                                                                | -0.56940                                                                            | -0.04146 |   |   |   |          |          |          |   |          |         |          |   |          |         |          |   |          |         |         |   |          |         |         |   |          |          |         |   |          |          |          |   |          |         |          |   |          |         |         |   |          |         |         |   |          |          |         |   |          |          |          |   |          |          |          |   |         |          |          |   |         |          |          |   |         |          |          |   |         |         |          |   |         |          |         |   |         |         |          |   |         |         |          |   |         |          |         |                                                                                                                                                                                                                                                                                                                                                                                                                                                                                                                                                                                                                                                                                                                                                                                                                                                                                                                                                                                                                                                                                                                                                                                                                                                                                                                                                                                                                                                                                                                                                                                                                                                                                |           |         |         |         |         |         |         |         |         |         |         |          |          |          |          |          |          |          |          |          |          |          |          |          |          |          |          |          |          |          |          |          |          |          |          |          |          |          |          |          |          |          |          |          |          |          |          |          |          |          |          |          |          |          |          |          |          |          |          |          |          |          |          |          |          |          |          |          |          |          |          |          |          |          |          |
| C                        | 1.41369                                                                                                                                                                                                                                                                                                                                                                                                                                                                                                                                                                                                                                                                                                                                                                                                                                                                                                                                                                                                                                                                                                                                                                                                                                                                                                                                                                                                                                                                                                                                                                                                                                                                                                                | 0.75931                                                                             | -0.42515 |   |   |   |          |          |          |   |          |         |          |   |          |         |          |   |          |         |         |   |          |         |         |   |          |          |         |   |          |          |          |   |          |         |          |   |          |         |         |   |          |         |         |   |          |          |         |   |          |          |          |   |          |          |          |   |         |          |          |   |         |          |          |   |         |          |          |   |         |         |          |   |         |          |         |   |         |         |          |   |         |         |          |   |         |          |         |                                                                                                                                                                                                                                                                                                                                                                                                                                                                                                                                                                                                                                                                                                                                                                                                                                                                                                                                                                                                                                                                                                                                                                                                                                                                                                                                                                                                                                                                                                                                                                                                                                                                                |           |         |         |         |         |         |         |         |         |         |         |          |          |          |          |          |          |          |          |          |          |          |          |          |          |          |          |          |          |          |          |          |          |          |          |          |          |          |          |          |          |          |          |          |          |          |          |          |          |          |          |          |          |          |          |          |          |          |          |          |          |          |          |          |          |          |          |          |          |          |          |          |          |          |          |
| C                        | 2.88666                                                                                                                                                                                                                                                                                                                                                                                                                                                                                                                                                                                                                                                                                                                                                                                                                                                                                                                                                                                                                                                                                                                                                                                                                                                                                                                                                                                                                                                                                                                                                                                                                                                                                                                | -0.96753                                                                            | 0.40461  |   |   |   |          |          |          |   |          |         |          |   |          |         |          |   |          |         |         |   |          |         |         |   |          |          |         |   |          |          |          |   |          |         |          |   |          |         |         |   |          |         |         |   |          |          |         |   |          |          |          |   |          |          |          |   |         |          |          |   |         |          |          |   |         |          |          |   |         |         |          |   |         |          |         |   |         |         |          |   |         |         |          |   |         |          |         |                                                                                                                                                                                                                                                                                                                                                                                                                                                                                                                                                                                                                                                                                                                                                                                                                                                                                                                                                                                                                                                                                                                                                                                                                                                                                                                                                                                                                                                                                                                                                                                                                                                                                |           |         |         |         |         |         |         |         |         |         |         |          |          |          |          |          |          |          |          |          |          |          |          |          |          |          |          |          |          |          |          |          |          |          |          |          |          |          |          |          |          |          |          |          |          |          |          |          |          |          |          |          |          |          |          |          |          |          |          |          |          |          |          |          |          |          |          |          |          |          |          |          |          |          |          |
| C                        | 2.46743                                                                                                                                                                                                                                                                                                                                                                                                                                                                                                                                                                                                                                                                                                                                                                                                                                                                                                                                                                                                                                                                                                                                                                                                                                                                                                                                                                                                                                                                                                                                                                                                                                                                                                                | 1.66716                                                                             | -0.36071 |   |   |   |          |          |          |   |          |         |          |   |          |         |          |   |          |         |         |   |          |         |         |   |          |          |         |   |          |          |          |   |          |         |          |   |          |         |         |   |          |         |         |   |          |          |         |   |          |          |          |   |          |          |          |   |         |          |          |   |         |          |          |   |         |          |          |   |         |         |          |   |         |          |         |   |         |         |          |   |         |         |          |   |         |          |         |                                                                                                                                                                                                                                                                                                                                                                                                                                                                                                                                                                                                                                                                                                                                                                                                                                                                                                                                                                                                                                                                                                                                                                                                                                                                                                                                                                                                                                                                                                                                                                                                                                                                                |           |         |         |         |         |         |         |         |         |         |         |          |          |          |          |          |          |          |          |          |          |          |          |          |          |          |          |          |          |          |          |          |          |          |          |          |          |          |          |          |          |          |          |          |          |          |          |          |          |          |          |          |          |          |          |          |          |          |          |          |          |          |          |          |          |          |          |          |          |          |          |          |          |          |          |
| H                        | 0.43200                                                                                                                                                                                                                                                                                                                                                                                                                                                                                                                                                                                                                                                                                                                                                                                                                                                                                                                                                                                                                                                                                                                                                                                                                                                                                                                                                                                                                                                                                                                                                                                                                                                                                                                | 1.08677                                                                             | -0.75014 |   |   |   |          |          |          |   |          |         |          |   |          |         |          |   |          |         |         |   |          |         |         |   |          |          |         |   |          |          |          |   |          |         |          |   |          |         |         |   |          |         |         |   |          |          |         |   |          |          |          |   |          |          |          |   |         |          |          |   |         |          |          |   |         |          |          |   |         |         |          |   |         |          |         |   |         |         |          |   |         |         |          |   |         |          |         |                                                                                                                                                                                                                                                                                                                                                                                                                                                                                                                                                                                                                                                                                                                                                                                                                                                                                                                                                                                                                                                                                                                                                                                                                                                                                                                                                                                                                                                                                                                                                                                                                                                                                |           |         |         |         |         |         |         |         |         |         |         |          |          |          |          |          |          |          |          |          |          |          |          |          |          |          |          |          |          |          |          |          |          |          |          |          |          |          |          |          |          |          |          |          |          |          |          |          |          |          |          |          |          |          |          |          |          |          |          |          |          |          |          |          |          |          |          |          |          |          |          |          |          |          |          |
| C                        | 3.92626                                                                                                                                                                                                                                                                                                                                                                                                                                                                                                                                                                                                                                                                                                                                                                                                                                                                                                                                                                                                                                                                                                                                                                                                                                                                                                                                                                                                                                                                                                                                                                                                                                                                                                                | -0.05085                                                                            | 0.46366  |   |   |   |          |          |          |   |          |         |          |   |          |         |          |   |          |         |         |   |          |         |         |   |          |          |         |   |          |          |          |   |          |         |          |   |          |         |         |   |          |         |         |   |          |          |         |   |          |          |          |   |          |          |          |   |         |          |          |   |         |          |          |   |         |          |          |   |         |         |          |   |         |          |         |   |         |         |          |   |         |         |          |   |         |          |         |                                                                                                                                                                                                                                                                                                                                                                                                                                                                                                                                                                                                                                                                                                                                                                                                                                                                                                                                                                                                                                                                                                                                                                                                                                                                                                                                                                                                                                                                                                                                                                                                                                                                                |           |         |         |         |         |         |         |         |         |         |         |          |          |          |          |          |          |          |          |          |          |          |          |          |          |          |          |          |          |          |          |          |          |          |          |          |          |          |          |          |          |          |          |          |          |          |          |          |          |          |          |          |          |          |          |          |          |          |          |          |          |          |          |          |          |          |          |          |          |          |          |          |          |          |          |
| -499.0177                | 16.7566                                                                                                                                                                                                                                                                                                                                                                                                                                                                                                                                                                                                                                                                                                                                                                                                                                                                                                                                                                                                                                                                                                                                                                                                                                                                                                                                                                                                                                                                                                                                                                                                                                                                                                                | 27.2179                                                                             |          |   |   |   |          |          |          |   |          |         |          |   |          |         |          |   |          |         |         |   |          |         |         |   |          |          |         |   |          |          |          |   |          |         |          |   |          |         |         |   |          |         |         |   |          |          |         |   |          |          |          |   |          |          |          |   |         |          |          |   |         |          |          |   |         |          |          |   |         |         |          |   |         |          |         |   |         |         |          |   |         |         |          |   |         |          |         |                                                                                                                                                                                                                                                                                                                                                                                                                                                                                                                                                                                                                                                                                                                                                                                                                                                                                                                                                                                                                                                                                                                                                                                                                                                                                                                                                                                                                                                                                                                                                                                                                                                                                |           |         |         |         |         |         |         |         |         |         |         |          |          |          |          |          |          |          |          |          |          |          |          |          |          |          |          |          |          |          |          |          |          |          |          |          |          |          |          |          |          |          |          |          |          |          |          |          |          |          |          |          |          |          |          |          |          |          |          |          |          |          |          |          |          |          |          |          |          |          |          |          |          |          |          |
| 35.3179                  | 38.0863                                                                                                                                                                                                                                                                                                                                                                                                                                                                                                                                                                                                                                                                                                                                                                                                                                                                                                                                                                                                                                                                                                                                                                                                                                                                                                                                                                                                                                                                                                                                                                                                                                                                                                                | 55.6009                                                                             |          |   |   |   |          |          |          |   |          |         |          |   |          |         |          |   |          |         |         |   |          |         |         |   |          |          |         |   |          |          |          |   |          |         |          |   |          |         |         |   |          |         |         |   |          |          |         |   |          |          |          |   |          |          |          |   |         |          |          |   |         |          |          |   |         |          |          |   |         |         |          |   |         |          |         |   |         |         |          |   |         |         |          |   |         |          |         |                                                                                                                                                                                                                                                                                                                                                                                                                                                                                                                                                                                                                                                                                                                                                                                                                                                                                                                                                                                                                                                                                                                                                                                                                                                                                                                                                                                                                                                                                                                                                                                                                                                                                |           |         |         |         |         |         |         |         |         |         |         |          |          |          |          |          |          |          |          |          |          |          |          |          |          |          |          |          |          |          |          |          |          |          |          |          |          |          |          |          |          |          |          |          |          |          |          |          |          |          |          |          |          |          |          |          |          |          |          |          |          |          |          |          |          |          |          |          |          |          |          |          |          |          |          |
| 59.3574                  | 69.6039                                                                                                                                                                                                                                                                                                                                                                                                                                                                                                                                                                                                                                                                                                                                                                                                                                                                                                                                                                                                                                                                                                                                                                                                                                                                                                                                                                                                                                                                                                                                                                                                                                                                                                                | 71.9292                                                                             |          |   |   |   |          |          |          |   |          |         |          |   |          |         |          |   |          |         |         |   |          |         |         |   |          |          |         |   |          |          |          |   |          |         |          |   |          |         |         |   |          |         |         |   |          |          |         |   |          |          |          |   |          |          |          |   |         |          |          |   |         |          |          |   |         |          |          |   |         |         |          |   |         |          |         |   |         |         |          |   |         |         |          |   |         |          |         |                                                                                                                                                                                                                                                                                                                                                                                                                                                                                                                                                                                                                                                                                                                                                                                                                                                                                                                                                                                                                                                                                                                                                                                                                                                                                                                                                                                                                                                                                                                                                                                                                                                                                |           |         |         |         |         |         |         |         |         |         |         |          |          |          |          |          |          |          |          |          |          |          |          |          |          |          |          |          |          |          |          |          |          |          |          |          |          |          |          |          |          |          |          |          |          |          |          |          |          |          |          |          |          |          |          |          |          |          |          |          |          |          |          |          |          |          |          |          |          |          |          |          |          |          |          |
| 79.7597                  | 95.2402                                                                                                                                                                                                                                                                                                                                                                                                                                                                                                                                                                                                                                                                                                                                                                                                                                                                                                                                                                                                                                                                                                                                                                                                                                                                                                                                                                                                                                                                                                                                                                                                                                                                                                                | 112.7508                                                                            |          |   |   |   |          |          |          |   |          |         |          |   |          |         |          |   |          |         |         |   |          |         |         |   |          |          |         |   |          |          |          |   |          |         |          |   |          |         |         |   |          |         |         |   |          |          |         |   |          |          |          |   |          |          |          |   |         |          |          |   |         |          |          |   |         |          |          |   |         |         |          |   |         |          |         |   |         |         |          |   |         |         |          |   |         |          |         |                                                                                                                                                                                                                                                                                                                                                                                                                                                                                                                                                                                                                                                                                                                                                                                                                                                                                                                                                                                                                                                                                                                                                                                                                                                                                                                                                                                                                                                                                                                                                                                                                                                                                |           |         |         |         |         |         |         |         |         |         |         |          |          |          |          |          |          |          |          |          |          |          |          |          |          |          |          |          |          |          |          |          |          |          |          |          |          |          |          |          |          |          |          |          |          |          |          |          |          |          |          |          |          |          |          |          |          |          |          |          |          |          |          |          |          |          |          |          |          |          |          |          |          |          |          |
| 123.4325                 | 134.2896                                                                                                                                                                                                                                                                                                                                                                                                                                                                                                                                                                                                                                                                                                                                                                                                                                                                                                                                                                                                                                                                                                                                                                                                                                                                                                                                                                                                                                                                                                                                                                                                                                                                                                               | 138.4214                                                                            |          |   |   |   |          |          |          |   |          |         |          |   |          |         |          |   |          |         |         |   |          |         |         |   |          |          |         |   |          |          |          |   |          |         |          |   |          |         |         |   |          |         |         |   |          |          |         |   |          |          |          |   |          |          |          |   |         |          |          |   |         |          |          |   |         |          |          |   |         |         |          |   |         |          |         |   |         |         |          |   |         |         |          |   |         |          |         |                                                                                                                                                                                                                                                                                                                                                                                                                                                                                                                                                                                                                                                                                                                                                                                                                                                                                                                                                                                                                                                                                                                                                                                                                                                                                                                                                                                                                                                                                                                                                                                                                                                                                |           |         |         |         |         |         |         |         |         |         |         |          |          |          |          |          |          |          |          |          |          |          |          |          |          |          |          |          |          |          |          |          |          |          |          |          |          |          |          |          |          |          |          |          |          |          |          |          |          |          |          |          |          |          |          |          |          |          |          |          |          |          |          |          |          |          |          |          |          |          |          |          |          |          |          |
| 163.0025                 | 166.2698                                                                                                                                                                                                                                                                                                                                                                                                                                                                                                                                                                                                                                                                                                                                                                                                                                                                                                                                                                                                                                                                                                                                                                                                                                                                                                                                                                                                                                                                                                                                                                                                                                                                                                               | 178.7245                                                                            |          |   |   |   |          |          |          |   |          |         |          |   |          |         |          |   |          |         |         |   |          |         |         |   |          |          |         |   |          |          |          |   |          |         |          |   |          |         |         |   |          |         |         |   |          |          |         |   |          |          |          |   |          |          |          |   |         |          |          |   |         |          |          |   |         |          |          |   |         |         |          |   |         |          |         |   |         |         |          |   |         |         |          |   |         |          |         |                                                                                                                                                                                                                                                                                                                                                                                                                                                                                                                                                                                                                                                                                                                                                                                                                                                                                                                                                                                                                                                                                                                                                                                                                                                                                                                                                                                                                                                                                                                                                                                                                                                                                |           |         |         |         |         |         |         |         |         |         |         |          |          |          |          |          |          |          |          |          |          |          |          |          |          |          |          |          |          |          |          |          |          |          |          |          |          |          |          |          |          |          |          |          |          |          |          |          |          |          |          |          |          |          |          |          |          |          |          |          |          |          |          |          |          |          |          |          |          |          |          |          |          |          |          |
| 218.2390                 | 242.2081                                                                                                                                                                                                                                                                                                                                                                                                                                                                                                                                                                                                                                                                                                                                                                                                                                                                                                                                                                                                                                                                                                                                                                                                                                                                                                                                                                                                                                                                                                                                                                                                                                                                                                               | 249.8588                                                                            |          |   |   |   |          |          |          |   |          |         |          |   |          |         |          |   |          |         |         |   |          |         |         |   |          |          |         |   |          |          |          |   |          |         |          |   |          |         |         |   |          |         |         |   |          |          |         |   |          |          |          |   |          |          |          |   |         |          |          |   |         |          |          |   |         |          |          |   |         |         |          |   |         |          |         |   |         |         |          |   |         |         |          |   |         |          |         |                                                                                                                                                                                                                                                                                                                                                                                                                                                                                                                                                                                                                                                                                                                                                                                                                                                                                                                                                                                                                                                                                                                                                                                                                                                                                                                                                                                                                                                                                                                                                                                                                                                                                |           |         |         |         |         |         |         |         |         |         |         |          |          |          |          |          |          |          |          |          |          |          |          |          |          |          |          |          |          |          |          |          |          |          |          |          |          |          |          |          |          |          |          |          |          |          |          |          |          |          |          |          |          |          |          |          |          |          |          |          |          |          |          |          |          |          |          |          |          |          |          |          |          |          |          |
| 255.7511                 | 259.8201                                                                                                                                                                                                                                                                                                                                                                                                                                                                                                                                                                                                                                                                                                                                                                                                                                                                                                                                                                                                                                                                                                                                                                                                                                                                                                                                                                                                                                                                                                                                                                                                                                                                                                               | 262.2089                                                                            |          |   |   |   |          |          |          |   |          |         |          |   |          |         |          |   |          |         |         |   |          |         |         |   |          |          |         |   |          |          |          |   |          |         |          |   |          |         |         |   |          |         |         |   |          |          |         |   |          |          |          |   |          |          |          |   |         |          |          |   |         |          |          |   |         |          |          |   |         |         |          |   |         |          |         |   |         |         |          |   |         |         |          |   |         |          |         |                                                                                                                                                                                                                                                                                                                                                                                                                                                                                                                                                                                                                                                                                                                                                                                                                                                                                                                                                                                                                                                                                                                                                                                                                                                                                                                                                                                                                                                                                                                                                                                                                                                                                |           |         |         |         |         |         |         |         |         |         |         |          |          |          |          |          |          |          |          |          |          |          |          |          |          |          |          |          |          |          |          |          |          |          |          |          |          |          |          |          |          |          |          |          |          |          |          |          |          |          |          |          |          |          |          |          |          |          |          |          |          |          |          |          |          |          |          |          |          |          |          |          |          |          |          |
| 271.1953                 | 282.4510                                                                                                                                                                                                                                                                                                                                                                                                                                                                                                                                                                                                                                                                                                                                                                                                                                                                                                                                                                                                                                                                                                                                                                                                                                                                                                                                                                                                                                                                                                                                                                                                                                                                                                               | 308.5209                                                                            |          |   |   |   |          |          |          |   |          |         |          |   |          |         |          |   |          |         |         |   |          |         |         |   |          |          |         |   |          |          |          |   |          |         |          |   |          |         |         |   |          |         |         |   |          |          |         |   |          |          |          |   |          |          |          |   |         |          |          |   |         |          |          |   |         |          |          |   |         |         |          |   |         |          |         |   |         |         |          |   |         |         |          |   |         |          |         |                                                                                                                                                                                                                                                                                                                                                                                                                                                                                                                                                                                                                                                                                                                                                                                                                                                                                                                                                                                                                                                                                                                                                                                                                                                                                                                                                                                                                                                                                                                                                                                                                                                                                |           |         |         |         |         |         |         |         |         |         |         |          |          |          |          |          |          |          |          |          |          |          |          |          |          |          |          |          |          |          |          |          |          |          |          |          |          |          |          |          |          |          |          |          |          |          |          |          |          |          |          |          |          |          |          |          |          |          |          |          |          |          |          |          |          |          |          |          |          |          |          |          |          |          |          |
| 312.7484                 | 338.5479                                                                                                                                                                                                                                                                                                                                                                                                                                                                                                                                                                                                                                                                                                                                                                                                                                                                                                                                                                                                                                                                                                                                                                                                                                                                                                                                                                                                                                                                                                                                                                                                                                                                                                               | 340.9584                                                                            |          |   |   |   |          |          |          |   |          |         |          |   |          |         |          |   |          |         |         |   |          |         |         |   |          |          |         |   |          |          |          |   |          |         |          |   |          |         |         |   |          |         |         |   |          |          |         |   |          |          |          |   |          |          |          |   |         |          |          |   |         |          |          |   |         |          |          |   |         |         |          |   |         |          |         |   |         |         |          |   |         |         |          |   |         |          |         |                                                                                                                                                                                                                                                                                                                                                                                                                                                                                                                                                                                                                                                                                                                                                                                                                                                                                                                                                                                                                                                                                                                                                                                                                                                                                                                                                                                                                                                                                                                                                                                                                                                                                |           |         |         |         |         |         |         |         |         |         |         |          |          |          |          |          |          |          |          |          |          |          |          |          |          |          |          |          |          |          |          |          |          |          |          |          |          |          |          |          |          |          |          |          |          |          |          |          |          |          |          |          |          |          |          |          |          |          |          |          |          |          |          |          |          |          |          |          |          |          |          |          |          |          |          |
| 352.9684                 | 377.7556                                                                                                                                                                                                                                                                                                                                                                                                                                                                                                                                                                                                                                                                                                                                                                                                                                                                                                                                                                                                                                                                                                                                                                                                                                                                                                                                                                                                                                                                                                                                                                                                                                                                                                               | 382.4435                                                                            |          |   |   |   |          |          |          |   |          |         |          |   |          |         |          |   |          |         |         |   |          |         |         |   |          |          |         |   |          |          |          |   |          |         |          |   |          |         |         |   |          |         |         |   |          |          |         |   |          |          |          |   |          |          |          |   |         |          |          |   |         |          |          |   |         |          |          |   |         |         |          |   |         |          |         |   |         |         |          |   |         |         |          |   |         |          |         |                                                                                                                                                                                                                                                                                                                                                                                                                                                                                                                                                                                                                                                                                                                                                                                                                                                                                                                                                                                                                                                                                                                                                                                                                                                                                                                                                                                                                                                                                                                                                                                                                                                                                |           |         |         |         |         |         |         |         |         |         |         |          |          |          |          |          |          |          |          |          |          |          |          |          |          |          |          |          |          |          |          |          |          |          |          |          |          |          |          |          |          |          |          |          |          |          |          |          |          |          |          |          |          |          |          |          |          |          |          |          |          |          |          |          |          |          |          |          |          |          |          |          |          |          |          |
| 405.7619                 | 407.7913                                                                                                                                                                                                                                                                                                                                                                                                                                                                                                                                                                                                                                                                                                                                                                                                                                                                                                                                                                                                                                                                                                                                                                                                                                                                                                                                                                                                                                                                                                                                                                                                                                                                                                               | 410.1227                                                                            |          |   |   |   |          |          |          |   |          |         |          |   |          |         |          |   |          |         |         |   |          |         |         |   |          |          |         |   |          |          |          |   |          |         |          |   |          |         |         |   |          |         |         |   |          |          |         |   |          |          |          |   |          |          |          |   |         |          |          |   |         |          |          |   |         |          |          |   |         |         |          |   |         |          |         |   |         |         |          |   |         |         |          |   |         |          |         |                                                                                                                                                                                                                                                                                                                                                                                                                                                                                                                                                                                                                                                                                                                                                                                                                                                                                                                                                                                                                                                                                                                                                                                                                                                                                                                                                                                                                                                                                                                                                                                                                                                                                |           |         |         |         |         |         |         |         |         |         |         |          |          |          |          |          |          |          |          |          |          |          |          |          |          |          |          |          |          |          |          |          |          |          |          |          |          |          |          |          |          |          |          |          |          |          |          |          |          |          |          |          |          |          |          |          |          |          |          |          |          |          |          |          |          |          |          |          |          |          |          |          |          |          |          |
| 416.9960                 | 430.5540                                                                                                                                                                                                                                                                                                                                                                                                                                                                                                                                                                                                                                                                                                                                                                                                                                                                                                                                                                                                                                                                                                                                                                                                                                                                                                                                                                                                                                                                                                                                                                                                                                                                                                               | 447.6063                                                                            |          |   |   |   |          |          |          |   |          |         |          |   |          |         |          |   |          |         |         |   |          |         |         |   |          |          |         |   |          |          |          |   |          |         |          |   |          |         |         |   |          |         |         |   |          |          |         |   |          |          |          |   |          |          |          |   |         |          |          |   |         |          |          |   |         |          |          |   |         |         |          |   |         |          |         |   |         |         |          |   |         |         |          |   |         |          |         |                                                                                                                                                                                                                                                                                                                                                                                                                                                                                                                                                                                                                                                                                                                                                                                                                                                                                                                                                                                                                                                                                                                                                                                                                                                                                                                                                                                                                                                                                                                                                                                                                                                                                |           |         |         |         |         |         |         |         |         |         |         |          |          |          |          |          |          |          |          |          |          |          |          |          |          |          |          |          |          |          |          |          |          |          |          |          |          |          |          |          |          |          |          |          |          |          |          |          |          |          |          |          |          |          |          |          |          |          |          |          |          |          |          |          |          |          |          |          |          |          |          |          |          |          |          |
| 452.3514                 | 462.0510                                                                                                                                                                                                                                                                                                                                                                                                                                                                                                                                                                                                                                                                                                                                                                                                                                                                                                                                                                                                                                                                                                                                                                                                                                                                                                                                                                                                                                                                                                                                                                                                                                                                                                               | 465.3520                                                                            |          |   |   |   |          |          |          |   |          |         |          |   |          |         |          |   |          |         |         |   |          |         |         |   |          |          |         |   |          |          |          |   |          |         |          |   |          |         |         |   |          |         |         |   |          |          |         |   |          |          |          |   |          |          |          |   |         |          |          |   |         |          |          |   |         |          |          |   |         |         |          |   |         |          |         |   |         |         |          |   |         |         |          |   |         |          |         |                                                                                                                                                                                                                                                                                                                                                                                                                                                                                                                                                                                                                                                                                                                                                                                                                                                                                                                                                                                                                                                                                                                                                                                                                                                                                                                                                                                                                                                                                                                                                                                                                                                                                |           |         |         |         |         |         |         |         |         |         |         |          |          |          |          |          |          |          |          |          |          |          |          |          |          |          |          |          |          |          |          |          |          |          |          |          |          |          |          |          |          |          |          |          |          |          |          |          |          |          |          |          |          |          |          |          |          |          |          |          |          |          |          |          |          |          |          |          |          |          |          |          |          |          |          |
| 477.5259                 | 485.7550                                                                                                                                                                                                                                                                                                                                                                                                                                                                                                                                                                                                                                                                                                                                                                                                                                                                                                                                                                                                                                                                                                                                                                                                                                                                                                                                                                                                                                                                                                                                                                                                                                                                                                               | 486.6900                                                                            |          |   |   |   |          |          |          |   |          |         |          |   |          |         |          |   |          |         |         |   |          |         |         |   |          |          |         |   |          |          |          |   |          |         |          |   |          |         |         |   |          |         |         |   |          |          |         |   |          |          |          |   |          |          |          |   |         |          |          |   |         |          |          |   |         |          |          |   |         |         |          |   |         |          |         |   |         |         |          |   |         |         |          |   |         |          |         |                                                                                                                                                                                                                                                                                                                                                                                                                                                                                                                                                                                                                                                                                                                                                                                                                                                                                                                                                                                                                                                                                                                                                                                                                                                                                                                                                                                                                                                                                                                                                                                                                                                                                |           |         |         |         |         |         |         |         |         |         |         |          |          |          |          |          |          |          |          |          |          |          |          |          |          |          |          |          |          |          |          |          |          |          |          |          |          |          |          |          |          |          |          |          |          |          |          |          |          |          |          |          |          |          |          |          |          |          |          |          |          |          |          |          |          |          |          |          |          |          |          |          |          |          |          |
| 492.3731                 | 494.3883                                                                                                                                                                                                                                                                                                                                                                                                                                                                                                                                                                                                                                                                                                                                                                                                                                                                                                                                                                                                                                                                                                                                                                                                                                                                                                                                                                                                                                                                                                                                                                                                                                                                                                               | 519.3630                                                                            |          |   |   |   |          |          |          |   |          |         |          |   |          |         |          |   |          |         |         |   |          |         |         |   |          |          |         |   |          |          |          |   |          |         |          |   |          |         |         |   |          |         |         |   |          |          |         |   |          |          |          |   |          |          |          |   |         |          |          |   |         |          |          |   |         |          |          |   |         |         |          |   |         |          |         |   |         |         |          |   |         |         |          |   |         |          |         |                                                                                                                                                                                                                                                                                                                                                                                                                                                                                                                                                                                                                                                                                                                                                                                                                                                                                                                                                                                                                                                                                                                                                                                                                                                                                                                                                                                                                                                                                                                                                                                                                                                                                |           |         |         |         |         |         |         |         |         |         |         |          |          |          |          |          |          |          |          |          |          |          |          |          |          |          |          |          |          |          |          |          |          |          |          |          |          |          |          |          |          |          |          |          |          |          |          |          |          |          |          |          |          |          |          |          |          |          |          |          |          |          |          |          |          |          |          |          |          |          |          |          |          |          |          |
| 521.3696                 | 534.0071                                                                                                                                                                                                                                                                                                                                                                                                                                                                                                                                                                                                                                                                                                                                                                                                                                                                                                                                                                                                                                                                                                                                                                                                                                                                                                                                                                                                                                                                                                                                                                                                                                                                                                               | 536.7446                                                                            |          |   |   |   |          |          |          |   |          |         |          |   |          |         |          |   |          |         |         |   |          |         |         |   |          |          |         |   |          |          |          |   |          |         |          |   |          |         |         |   |          |         |         |   |          |          |         |   |          |          |          |   |          |          |          |   |         |          |          |   |         |          |          |   |         |          |          |   |         |         |          |   |         |          |         |   |         |         |          |   |         |         |          |   |         |          |         |                                                                                                                                                                                                                                                                                                                                                                                                                                                                                                                                                                                                                                                                                                                                                                                                                                                                                                                                                                                                                                                                                                                                                                                                                                                                                                                                                                                                                                                                                                                                                                                                                                                                                |           |         |         |         |         |         |         |         |         |         |         |          |          |          |          |          |          |          |          |          |          |          |          |          |          |          |          |          |          |          |          |          |          |          |          |          |          |          |          |          |          |          |          |          |          |          |          |          |          |          |          |          |          |          |          |          |          |          |          |          |          |          |          |          |          |          |          |          |          |          |          |          |          |          |          |
| 556.4665                 | 559.3537                                                                                                                                                                                                                                                                                                                                                                                                                                                                                                                                                                                                                                                                                                                                                                                                                                                                                                                                                                                                                                                                                                                                                                                                                                                                                                                                                                                                                                                                                                                                                                                                                                                                                                               | 584.3102                                                                            |          |   |   |   |          |          |          |   |          |         |          |   |          |         |          |   |          |         |         |   |          |         |         |   |          |          |         |   |          |          |          |   |          |         |          |   |          |         |         |   |          |         |         |   |          |          |         |   |          |          |          |   |          |          |          |   |         |          |          |   |         |          |          |   |         |          |          |   |         |         |          |   |         |          |         |   |         |         |          |   |         |         |          |   |         |          |         |                                                                                                                                                                                                                                                                                                                                                                                                                                                                                                                                                                                                                                                                                                                                                                                                                                                                                                                                                                                                                                                                                                                                                                                                                                                                                                                                                                                                                                                                                                                                                                                                                                                                                |           |         |         |         |         |         |         |         |         |         |         |          |          |          |          |          |          |          |          |          |          |          |          |          |          |          |          |          |          |          |          |          |          |          |          |          |          |          |          |          |          |          |          |          |          |          |          |          |          |          |          |          |          |          |          |          |          |          |          |          |          |          |          |          |          |          |          |          |          |          |          |          |          |          |          |
| 586.4664                 | 594.4209                                                                                                                                                                                                                                                                                                                                                                                                                                                                                                                                                                                                                                                                                                                                                                                                                                                                                                                                                                                                                                                                                                                                                                                                                                                                                                                                                                                                                                                                                                                                                                                                                                                                                                               | 597.3468                                                                            |          |   |   |   |          |          |          |   |          |         |          |   |          |         |          |   |          |         |         |   |          |         |         |   |          |          |         |   |          |          |          |   |          |         |          |   |          |         |         |   |          |         |         |   |          |          |         |   |          |          |          |   |          |          |          |   |         |          |          |   |         |          |          |   |         |          |          |   |         |         |          |   |         |          |         |   |         |         |          |   |         |         |          |   |         |          |         |                                                                                                                                                                                                                                                                                                                                                                                                                                                                                                                                                                                                                                                                                                                                                                                                                                                                                                                                                                                                                                                                                                                                                                                                                                                                                                                                                                                                                                                                                                                                                                                                                                                                                |           |         |         |         |         |         |         |         |         |         |         |          |          |          |          |          |          |          |          |          |          |          |          |          |          |          |          |          |          |          |          |          |          |          |          |          |          |          |          |          |          |          |          |          |          |          |          |          |          |          |          |          |          |          |          |          |          |          |          |          |          |          |          |          |          |          |          |          |          |          |          |          |          |          |          |
| 599.0122                 | 625.2058                                                                                                                                                                                                                                                                                                                                                                                                                                                                                                                                                                                                                                                                                                                                                                                                                                                                                                                                                                                                                                                                                                                                                                                                                                                                                                                                                                                                                                                                                                                                                                                                                                                                                                               | 626.4752                                                                            |          |   |   |   |          |          |          |   |          |         |          |   |          |         |          |   |          |         |         |   |          |         |         |   |          |          |         |   |          |          |          |   |          |         |          |   |          |         |         |   |          |         |         |   |          |          |         |   |          |          |          |   |          |          |          |   |         |          |          |   |         |          |          |   |         |          |          |   |         |         |          |   |         |          |         |   |         |         |          |   |         |         |          |   |         |          |         |                                                                                                                                                                                                                                                                                                                                                                                                                                                                                                                                                                                                                                                                                                                                                                                                                                                                                                                                                                                                                                                                                                                                                                                                                                                                                                                                                                                                                                                                                                                                                                                                                                                                                |           |         |         |         |         |         |         |         |         |         |         |          |          |          |          |          |          |          |          |          |          |          |          |          |          |          |          |          |          |          |          |          |          |          |          |          |          |          |          |          |          |          |          |          |          |          |          |          |          |          |          |          |          |          |          |          |          |          |          |          |          |          |          |          |          |          |          |          |          |          |          |          |          |          |          |
| 627.2099                 | 677.9859                                                                                                                                                                                                                                                                                                                                                                                                                                                                                                                                                                                                                                                                                                                                                                                                                                                                                                                                                                                                                                                                                                                                                                                                                                                                                                                                                                                                                                                                                                                                                                                                                                                                                                               | 679.8313                                                                            |          |   |   |   |          |          |          |   |          |         |          |   |          |         |          |   |          |         |         |   |          |         |         |   |          |          |         |   |          |          |          |   |          |         |          |   |          |         |         |   |          |         |         |   |          |          |         |   |          |          |          |   |          |          |          |   |         |          |          |   |         |          |          |   |         |          |          |   |         |         |          |   |         |          |         |   |         |         |          |   |         |         |          |   |         |          |         |                                                                                                                                                                                                                                                                                                                                                                                                                                                                                                                                                                                                                                                                                                                                                                                                                                                                                                                                                                                                                                                                                                                                                                                                                                                                                                                                                                                                                                                                                                                                                                                                                                                                                |           |         |         |         |         |         |         |         |         |         |         |          |          |          |          |          |          |          |          |          |          |          |          |          |          |          |          |          |          |          |          |          |          |          |          |          |          |          |          |          |          |          |          |          |          |          |          |          |          |          |          |          |          |          |          |          |          |          |          |          |          |          |          |          |          |          |          |          |          |          |          |          |          |          |          |
| 688.0898                 | 689.9285                                                                                                                                                                                                                                                                                                                                                                                                                                                                                                                                                                                                                                                                                                                                                                                                                                                                                                                                                                                                                                                                                                                                                                                                                                                                                                                                                                                                                                                                                                                                                                                                                                                                                                               | 702.9933                                                                            |          |   |   |   |          |          |          |   |          |         |          |   |          |         |          |   |          |         |         |   |          |         |         |   |          |          |         |   |          |          |          |   |          |         |          |   |          |         |         |   |          |         |         |   |          |          |         |   |          |          |          |   |          |          |          |   |         |          |          |   |         |          |          |   |         |          |          |   |         |         |          |   |         |          |         |   |         |         |          |   |         |         |          |   |         |          |         |                                                                                                                                                                                                                                                                                                                                                                                                                                                                                                                                                                                                                                                                                                                                                                                                                                                                                                                                                                                                                                                                                                                                                                                                                                                                                                                                                                                                                                                                                                                                                                                                                                                                                |           |         |         |         |         |         |         |         |         |         |         |          |          |          |          |          |          |          |          |          |          |          |          |          |          |          |          |          |          |          |          |          |          |          |          |          |          |          |          |          |          |          |          |          |          |          |          |          |          |          |          |          |          |          |          |          |          |          |          |          |          |          |          |          |          |          |          |          |          |          |          |          |          |          |          |
| 708.4435                 | 713.9684                                                                                                                                                                                                                                                                                                                                                                                                                                                                                                                                                                                                                                                                                                                                                                                                                                                                                                                                                                                                                                                                                                                                                                                                                                                                                                                                                                                                                                                                                                                                                                                                                                                                                                               | 716.2347                                                                            |          |   |   |   |          |          |          |   |          |         |          |   |          |         |          |   |          |         |         |   |          |         |         |   |          |          |         |   |          |          |          |   |          |         |          |   |          |         |         |   |          |         |         |   |          |          |         |   |          |          |          |   |          |          |          |   |         |          |          |   |         |          |          |   |         |          |          |   |         |         |          |   |         |          |         |   |         |         |          |   |         |         |          |   |         |          |         |                                                                                                                                                                                                                                                                                                                                                                                                                                                                                                                                                                                                                                                                                                                                                                                                                                                                                                                                                                                                                                                                                                                                                                                                                                                                                                                                                                                                                                                                                                                                                                                                                                                                                |           |         |         |         |         |         |         |         |         |         |         |          |          |          |          |          |          |          |          |          |          |          |          |          |          |          |          |          |          |          |          |          |          |          |          |          |          |          |          |          |          |          |          |          |          |          |          |          |          |          |          |          |          |          |          |          |          |          |          |          |          |          |          |          |          |          |          |          |          |          |          |          |          |          |          |
| 722.1583                 | 734.7514                                                                                                                                                                                                                                                                                                                                                                                                                                                                                                                                                                                                                                                                                                                                                                                                                                                                                                                                                                                                                                                                                                                                                                                                                                                                                                                                                                                                                                                                                                                                                                                                                                                                                                               | 746.1621                                                                            |          |   |   |   |          |          |          |   |          |         |          |   |          |         |          |   |          |         |         |   |          |         |         |   |          |          |         |   |          |          |          |   |          |         |          |   |          |         |         |   |          |         |         |   |          |          |         |   |          |          |          |   |          |          |          |   |         |          |          |   |         |          |          |   |         |          |          |   |         |         |          |   |         |          |         |   |         |         |          |   |         |         |          |   |         |          |         |                                                                                                                                                                                                                                                                                                                                                                                                                                                                                                                                                                                                                                                                                                                                                                                                                                                                                                                                                                                                                                                                                                                                                                                                                                                                                                                                                                                                                                                                                                                                                                                                                                                                                |           |         |         |         |         |         |         |         |         |         |         |          |          |          |          |          |          |          |          |          |          |          |          |          |          |          |          |          |          |          |          |          |          |          |          |          |          |          |          |          |          |          |          |          |          |          |          |          |          |          |          |          |          |          |          |          |          |          |          |          |          |          |          |          |          |          |          |          |          |          |          |          |          |          |          |
| 749.0459                 | 759.4791                                                                                                                                                                                                                                                                                                                                                                                                                                                                                                                                                                                                                                                                                                                                                                                                                                                                                                                                                                                                                                                                                                                                                                                                                                                                                                                                                                                                                                                                                                                                                                                                                                                                                                               | 766.5835                                                                            |          |   |   |   |          |          |          |   |          |         |          |   |          |         |          |   |          |         |         |   |          |         |         |   |          |          |         |   |          |          |          |   |          |         |          |   |          |         |         |   |          |         |         |   |          |          |         |   |          |          |          |   |          |          |          |   |         |          |          |   |         |          |          |   |         |          |          |   |         |         |          |   |         |          |         |   |         |         |          |   |         |         |          |   |         |          |         |                                                                                                                                                                                                                                                                                                                                                                                                                                                                                                                                                                                                                                                                                                                                                                                                                                                                                                                                                                                                                                                                                                                                                                                                                                                                                                                                                                                                                                                                                                                                                                                                                                                                                |           |         |         |         |         |         |         |         |         |         |         |          |          |          |          |          |          |          |          |          |          |          |          |          |          |          |          |          |          |          |          |          |          |          |          |          |          |          |          |          |          |          |          |          |          |          |          |          |          |          |          |          |          |          |          |          |          |          |          |          |          |          |          |          |          |          |          |          |          |          |          |          |          |          |          |

|   |          |          |          |           |           |           |
|---|----------|----------|----------|-----------|-----------|-----------|
| H | 3.04766  | -1.99995 | 0.70430  | 774.5399  | 782.3931  | 786.7271  |
| C | 3.72640  | 1.27442  | 0.07975  | 800.1582  | 819.2162  | 822.1445  |
| H | 2.29337  | 2.69669  | -0.65803 | 827.4037  | 832.8841  | 835.8140  |
| H | 4.90254  | -0.37674 | 0.80875  | 837.4674  | 853.6895  | 859.0153  |
| H | 4.54117  | 1.98841  | 0.12634  | 862.0862  | 863.0783  | 867.6310  |
| C | 3.82628  | 1.39527  | -0.09170 | 872.6377  | 877.3378  | 883.2262  |
| C | 5.04592  | -0.71999 | -0.18079 | 884.9979  | 907.9968  | 919.0497  |
| C | 3.68573  | -2.85612 | -0.15703 | 919.7800  | 944.7476  | 949.3593  |
| H | 2.32963  | -4.51250 | -0.19077 | 952.8668  | 979.8238  | 980.9633  |
| C | 3.72116  | 2.82537  | -0.09574 | 987.8194  | 997.5817  | 1012.4907 |
| C | 5.04215  | 0.64935  | -0.16783 | 1014.4711 | 1015.2118 | 1016.0578 |
| C | 1.27913  | 2.64979  | 0.02889  | 1016.7967 | 1018.0681 | 1020.2887 |
| H | 5.97926  | -1.26824 | -0.25207 | 1023.0753 | 1032.7711 | 1036.2123 |
| H | 4.57397  | -3.47685 | -0.23081 | 1039.5019 | 1063.4144 | 1068.0037 |
| C | 2.50038  | 3.42118  | -0.03734 | 1074.2940 | 1118.9223 | 1121.3860 |
| H | 4.62414  | 3.42615  | -0.14688 | 1137.3576 | 1139.9886 | 1143.7026 |
| H | 5.97941  | 1.19435  | -0.22462 | 1158.2325 | 1166.2732 | 1174.5080 |
| H | 2.41296  | 4.50196  | -0.04125 | 1182.6602 | 1183.7234 | 1186.5415 |
| N | 1.39837  | -1.30919 | 0.06494  | 1187.5297 | 1189.5615 | 1202.2855 |
| N | 1.39857  | 1.30012  | 0.04294  | 1210.8405 | 1225.8012 | 1234.8147 |
| H | 0.19989  | 0.13900  | 1.59991  | 1240.8478 | 1244.2434 | 1246.3797 |
| C | -0.04820 | -3.26690 | -0.06233 | 1258.7543 | 1259.2004 | 1273.9147 |
| H | -0.03262 | -4.33522 | -0.25561 | 1276.5084 | 1298.7602 | 1302.5137 |
| C | 0.02703  | 3.28554  | 0.04759  | 1305.0847 | 1330.7982 | 1365.7932 |
| H | 0.03107  | 4.36759  | 0.00562  | 1370.1924 | 1378.4209 | 1389.6678 |
| H | -1.39197 | -1.36276 | 1.51537  | 1396.6695 | 1400.5973 | 1416.0344 |
|   |          |          |          | 1421.9060 | 1434.4658 | 1453.1879 |
|   |          |          |          | 1458.7024 | 1460.2516 | 1469.9636 |
|   |          |          |          | 1473.8361 | 1476.5253 | 1481.5337 |
|   |          |          |          | 1487.3813 | 1514.0108 | 1517.1048 |
|   |          |          |          | 1521.9447 | 1526.9651 | 1533.5060 |
|   |          |          |          | 1550.8547 | 1553.8818 | 1567.5054 |
|   |          |          |          | 1577.7994 | 1618.8597 | 1630.8772 |
|   |          |          |          | 1644.3708 | 1651.8953 | 1655.5532 |
|   |          |          |          | 1673.7971 | 1677.7063 | 1682.4976 |
|   |          |          |          | 1691.4119 | 1694.6886 | 1700.1512 |
|   |          |          |          | 1703.9423 | 1713.8858 | 1784.6739 |
|   |          |          |          | 3201.4474 | 3204.8395 | 3205.9525 |
|   |          |          |          | 3206.0831 | 3208.2428 | 3208.3620 |
|   |          |          |          | 3214.6865 | 3215.3558 | 3216.2461 |
|   |          |          |          | 3219.8510 | 3220.8820 | 3224.2427 |
|   |          |          |          | 3224.5952 | 3225.2340 | 3226.6275 |
|   |          |          |          | 3228.6344 | 3228.8720 | 3235.8991 |
|   |          |          |          | 3236.3506 | 3238.7425 | 3241.0996 |
|   |          |          |          | 3242.5522 | 3250.1753 | 3250.4326 |
|   |          |          |          | 3419.6617 | 3528.8584 | 3638.4703 |

### Statistical Thermodynamic Analysis

Temperature = 353.15 K

Pressure = 1 atm

Zero-point correction = 0.578882

Electronic Energy = -1937.60190442

Internal Energy (E) = -1936.97723642

Enthalpy (H) = -1936.97611742

Gibbs Free Energy (G) = -1937.10448342

Gibbs Free Energy of Solvation = -1937.16577563

| St. Point                      | General Structure                                                                 | Ball & Stick model                                                                 |           |
|--------------------------------|-----------------------------------------------------------------------------------|------------------------------------------------------------------------------------|-----------|
| <b>13</b> <sup>Hyd2(MLC)</sup> | 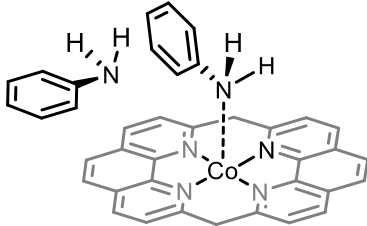 |  |           |
| <b>Cartesian coordinate</b>    |                                                                                   | <b>Frequencies</b>                                                                 |           |
| -----                          |                                                                                   |                                                                                    |           |
| <b>Atoms</b>                   | <b>X</b>                                                                          | <b>Y</b>                                                                           | <b>Z</b>  |
| -----                          |                                                                                   |                                                                                    |           |
|                                |                                                                                   |                                                                                    | 21.6720   |
|                                |                                                                                   |                                                                                    | 28.9476   |
|                                |                                                                                   |                                                                                    | 35.8805   |
|                                |                                                                                   |                                                                                    | 46.6524   |
|                                |                                                                                   |                                                                                    | 51.0832   |
|                                |                                                                                   |                                                                                    | 58.0098   |
|                                |                                                                                   |                                                                                    | 66.0687   |
|                                |                                                                                   |                                                                                    | 78.4247   |
|                                |                                                                                   |                                                                                    | 80.0125   |
|                                |                                                                                   |                                                                                    | 95.2993   |
|                                |                                                                                   |                                                                                    | 98.5182   |
|                                |                                                                                   |                                                                                    | 111.8891  |
| C                              | -1.59132                                                                          | -0.55569                                                                           | -0.33936  |
| C                              | -2.52583                                                                          | 0.01320                                                                            | -1.21175  |
| C                              | -3.62311                                                                          | 0.69949                                                                            | -0.70773  |
| C                              | -3.80531                                                                          | 0.83130                                                                            | 0.66686   |
| C                              | -2.86991                                                                          | 0.26676                                                                            | 1.52963   |
| C                              | -1.76563                                                                          | -0.42235                                                                           | 1.03972   |
| H                              | -2.39021                                                                          | -0.09261                                                                           | -2.28537  |
| H                              | -4.33978                                                                          | 1.13443                                                                            | -1.39750  |
| H                              | -4.66217                                                                          | 1.36834                                                                            | 1.05868   |
| H                              | -2.99515                                                                          | 0.36634                                                                            | 2.60360   |
| H                              | -1.03067                                                                          | -0.85462                                                                           | 1.70814   |
| N                              | -0.51656                                                                          | -1.28507                                                                           | -0.88411  |
| H                              | -0.25577                                                                          | -0.96723                                                                           | -1.81517  |
| N                              | 0.57640                                                                           | -1.50826                                                                           | -0.05795  |
| H                              | 0.88139                                                                           | -2.47146                                                                           | -0.09771  |
| C                              | 1.62013                                                                           | -0.56940                                                                           | -0.04146  |
| C                              | 1.41369                                                                           | 0.75931                                                                            | -0.42515  |
| C                              | 2.88666                                                                           | -0.96753                                                                           | 0.40461   |
| C                              | 2.46743                                                                           | 1.66716                                                                            | -0.36071  |
| H                              | 0.43200                                                                           | 1.08677                                                                            | -0.75014  |
| C                              | 3.92626                                                                           | -0.05085                                                                           | 0.46366   |
| H                              | 3.04766                                                                           | -1.99995                                                                           | 0.70430   |
| C                              | 3.72640                                                                           | 1.27442                                                                            | 0.07975   |
| H                              | 2.29337                                                                           | 2.69669                                                                            | -0.65803  |
| H                              | 4.90254                                                                           | -0.37674                                                                           | 0.80875   |
| H                              | 4.54117                                                                           | 1.98841                                                                            | 0.12634   |
| C                              | 3.82628                                                                           | 1.39527                                                                            | -0.09170  |
| C                              | 5.04592                                                                           | -0.71999                                                                           | -0.18079  |
| C                              | 3.68573                                                                           | -2.85612                                                                           | -0.15703  |
| H                              | 2.32963                                                                           | -4.51250                                                                           | -0.19077  |
| C                              | 3.72116                                                                           | 2.82537                                                                            | -0.09574  |
| C                              | 5.04215                                                                           | 0.64935                                                                            | -0.16783  |
| C                              | 1.27913                                                                           | 2.64979                                                                            | 0.02889   |
| H                              | 5.97926                                                                           | -1.26824                                                                           | -0.25207  |
| H                              | 4.57397                                                                           | -3.47685                                                                           | -0.23081  |
|                                |                                                                                   |                                                                                    | 1069.6484 |
|                                |                                                                                   |                                                                                    | 1070.3953 |
|                                |                                                                                   |                                                                                    | 1092.5771 |
|                                |                                                                                   |                                                                                    | 1011.8445 |
|                                |                                                                                   |                                                                                    | 1017.4444 |
|                                |                                                                                   |                                                                                    | 1018.5319 |
|                                |                                                                                   |                                                                                    | 1018.8267 |
|                                |                                                                                   |                                                                                    | 1019.7187 |
|                                |                                                                                   |                                                                                    | 1021.4500 |
|                                |                                                                                   |                                                                                    | 1022.1600 |
|                                |                                                                                   |                                                                                    | 1024.3525 |
|                                |                                                                                   |                                                                                    | 1042.7436 |
|                                |                                                                                   |                                                                                    | 1114.7646 |
|                                |                                                                                   |                                                                                    | 1120.5732 |
|                                |                                                                                   |                                                                                    | 1133.9523 |

|   |          |          |          |           |           |           |
|---|----------|----------|----------|-----------|-----------|-----------|
| C | 2.50038  | 3.42118  | -0.03734 | 1145.6837 | 1145.9618 | 1159.2448 |
| H | 4.62414  | 3.42615  | -0.14688 | 1162.0100 | 1166.7293 | 1176.9530 |
| H | 5.97941  | 1.19435  | -0.22462 | 1186.4482 | 1187.6986 | 1189.0217 |
| H | 2.41296  | 4.50196  | -0.04125 | 1190.0789 | 1204.6197 | 1208.4582 |
| N | 1.39837  | -1.30919 | 0.06494  | 1212.3860 | 1237.6956 | 1243.5347 |
| N | 1.39857  | 1.30012  | 0.04294  | 1247.8436 | 1252.5445 | 1262.4168 |
| H | 0.19989  | 0.13900  | 1.59991  | 1262.9951 | 1272.5244 | 1283.0779 |
| C | -0.04820 | -3.26690 | -0.06233 | 1302.8969 | 1307.3636 | 1312.4372 |
| H | -0.03262 | -4.33522 | -0.25561 | 1334.1441 | 1366.2655 | 1367.6831 |
| C | 0.02703  | 3.28554  | 0.04759  | 1369.1380 | 1376.0564 | 1387.7791 |
| H | 0.03107  | 4.36759  | 0.00562  | 1397.7775 | 1424.1717 | 1428.5452 |
| H | -1.39197 | -1.36276 | 1.51537  | 1439.3485 | 1440.3943 | 1458.5141 |
|   |          |          |          | 1462.1300 | 1466.8942 | 1469.6219 |
|   |          |          |          | 1477.7058 | 1483.3913 | 1491.6503 |
|   |          |          |          | 1514.7394 | 1525.6547 | 1525.9227 |
|   |          |          |          | 1527.7906 | 1555.6377 | 1557.3186 |
|   |          |          |          | 1560.9276 | 1573.2087 | 1579.4566 |
|   |          |          |          | 1626.0758 | 1630.4440 | 1649.3515 |
|   |          |          |          | 1656.7228 | 1658.3479 | 1676.2093 |
|   |          |          |          | 1685.7289 | 1696.3910 | 1698.9404 |
|   |          |          |          | 1699.6473 | 1701.0872 | 1701.6634 |
|   |          |          |          | 1706.9745 | 1716.5410 | 3193.0906 |
|   |          |          |          | 3197.0748 | 3202.0645 | 3207.6847 |
|   |          |          |          | 3209.9774 | 3212.1739 | 3213.4617 |
|   |          |          |          | 3214.2748 | 3218.4171 | 3219.0888 |
|   |          |          |          | 3220.7797 | 3224.1321 | 3224.7731 |
|   |          |          |          | 3226.5435 | 3228.5344 | 3229.4488 |
|   |          |          |          | 3230.4842 | 3230.5691 | 3234.1112 |
|   |          |          |          | 3234.2871 | 3235.0157 | 3237.3278 |
|   |          |          |          | 3246.7792 | 3252.4821 | 3391.9422 |
|   |          |          |          | 3474.2474 | 3557.6600 | 3663.9941 |

### Statistical Thermodynamic Analysis

Temperature = 353.15 K

Pressure = 1 atm

Zero-point correction = 0.584716

Electronic Energy = -1937.73824487

Internal Energy (E) = -1937.10706087

Enthalpy (H) = -1937.10594287

Gibbs Free Energy (G) = -1937.23516487

Gibbs Free Energy of Solvation = -1937.28902612

| St. Pt.             | General Structure                                                                   | Ball & Stick model                                                                   |
|---------------------|-------------------------------------------------------------------------------------|--------------------------------------------------------------------------------------|
| I1 <sub>CH3OH</sub> | 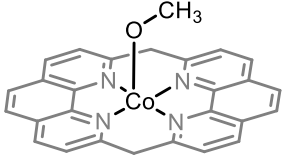 |  |

| Cartesian co-ordinate |          |          |          | Frequencies |           |           |
|-----------------------|----------|----------|----------|-------------|-----------|-----------|
| Atoms                 | X        | Y        | Z        |             |           |           |
|                       |          |          |          | 47.8438     | 64.0153   | 82.2672   |
|                       |          |          |          | 95.4314     | 108.8488  | 129.5337  |
|                       |          |          |          | 138.3192    | 172.5164  | 194.5546  |
|                       |          |          |          | 216.6979    | 233.7781  | 243.5490  |
|                       |          |          |          | 253.1668    | 255.0248  | 257.3945  |
|                       |          |          |          | 276.1539    | 280.2864  | 295.6052  |
|                       |          |          |          | 314.6121    | 340.3204  | 349.4642  |
|                       |          |          |          | 358.7948    | 384.8516  | 405.0038  |
|                       |          |          |          | 410.2213    | 414.2232  | 449.2187  |
|                       |          |          |          | 462.0311    | 470.6794  | 479.1165  |
|                       |          |          |          | 483.3616    | 486.1039  | 495.8549  |
|                       |          |          |          | 497.2721    | 540.6988  | 557.9145  |
|                       |          |          |          | 584.4349    | 585.9897  | 595.4556  |
|                       |          |          |          | 596.7656    | 600.6123  | 611.6386  |
|                       |          |          |          | 627.2734    | 680.6373  | 686.6930  |
|                       |          |          |          | 690.1149    | 712.7212  | 716.8891  |
|                       |          |          |          | 721.0734    | 743.0372  | 746.4514  |
|                       |          |          |          | 752.0594    | 759.4296  | 766.3444  |
|                       |          |          |          | 768.0288    | 813.9401  | 820.3002  |
|                       |          |          |          | 825.6547    | 828.6685  | 856.3243  |
|                       |          |          |          | 861.8597    | 865.5186  | 868.9308  |
|                       |          |          |          | 870.3216    | 878.2250  | 909.0743  |
|                       |          |          |          | 922.8211    | 943.0199  | 949.5246  |
|                       |          |          |          | 969.9573    | 970.6712  | 1013.0610 |
| Co                    | -0.01373 | -0.03781 | -0.01274 | 1015.8446   | 1016.5568 | 1017.5469 |
| C                     | 2.59667  | -0.75936 | -0.19681 | 1018.0577   | 1045.3844 | 1122.0346 |
| C                     | 1.23212  | -2.68659 | -0.12162 | 1135.9577   | 1142.8987 | 1156.5655 |
| C                     | 2.60296  | 0.66290  | -0.22985 | 1161.0028   | 1169.5072 | 1173.7318 |
| C                     | 3.80048  | -1.46979 | -0.17818 | 1182.7194   | 1186.0992 | 1187.6116 |
| C                     | 2.44450  | -3.47614 | -0.10651 | 1191.7908   | 1235.9227 | 1241.5766 |
| C                     | 3.81154  | 1.36428  | -0.24625 | 1245.2540   | 1248.6102 | 1258.1864 |
| C                     | 5.02214  | -0.74435 | -0.20117 | 1258.7005   | 1279.3727 | 1301.4211 |
| C                     | 3.67380  | -2.89629 | -0.13406 | 1305.2174   | 1330.7082 | 1388.7196 |
| H                     | 2.34269  | -4.55541 | -0.06551 | 1398.8759   | 1421.7167 | 1428.7896 |
| C                     | 3.69631  | 2.79218  | -0.27285 | 1435.9775   | 1455.5035 | 1459.8449 |
| C                     | 5.02813  | 0.62949  | -0.23495 | 1467.5818   | 1469.2683 | 1477.3789 |
| C                     | 1.25375  | 2.60464  | -0.24543 | 1483.2799   | 1485.6092 | 1486.6446 |
| H                     | 5.95742  | -1.29603 | -0.19034 | 1486.7742   | 1491.9707 | 1520.9459 |
| H                     | 4.57116  | -3.50873 | -0.11862 | 1522.6399   | 1537.8101 | 1572.1258 |
| C                     | 2.47203  | 3.38359  | -0.27506 | 1573.6332   | 1577.9825 | 1629.1156 |
| H                     | 4.59870  | 3.39723  | -0.28845 | 1639.2856   | 1664.6884 | 1684.5754 |
| H                     | 5.96764  | 1.17362  | -0.25171 | 1704.4277   | 1705.8857 | 1714.9183 |
| H                     | 2.37931  | 4.46429  | -0.29061 | 1724.6847   | 2986.7978 | 3043.5072 |
| N                     | 1.36674  | -1.34313 | -0.18729 | 3070.2284   | 3200.0003 | 3200.0955 |
| N                     | 1.37507  | 1.25737  | -0.23693 | 3214.3853   | 3214.8157 | 3215.6354 |
| O                     | -0.09841 | -0.15142 | 1.80107  | 3215.9969   | 3216.4963 | 3216.6239 |
| C                     | 0.37477  | 0.94790  | 2.51034  | 3223.5371   | 3224.8900 | 3231.5977 |
| H                     | 0.09002  | 0.80374  | 3.56236  | 3232.6628   | 3232.8691 | 3233.8259 |
| H                     | 1.47266  | 1.05190  | 2.47291  |             |           |           |
| H                     | -0.06697 | 1.90390  | 2.18170  |             |           |           |
| C                     | -0.02551 | -3.31128 | -0.08246 |             |           |           |
| H                     | -0.02980 | -4.39372 | -0.03182 |             |           |           |

|                                           |                                                 |         |          |  |
|-------------------------------------------|-------------------------------------------------|---------|----------|--|
| C                                         | 0.00124                                         | 3.24209 | -0.22119 |  |
| H                                         | 0.00625                                         | 4.32566 | -0.22609 |  |
| <b>Statistical Thermodynamic Analysis</b> |                                                 |         |          |  |
| Temperature = 403.15 K                    | Pressure = 1 atm                                |         |          |  |
| Zero-point correction = 0.384489          | Electronic Energy = -1477.97812357              |         |          |  |
| Internal Energy (E) = -1477.55203957      | Enthalpy (H) = -1477.55076357                   |         |          |  |
| Gibbs Free Energy (G) = -1477.67066857    | Gibbs Free Energy of Solvation = -1478.09081533 |         |          |  |

| St. Pt.                      | General Structure                                                                 |          |          | Ball & Stick model                                                                 |           |           |
|------------------------------|-----------------------------------------------------------------------------------|----------|----------|------------------------------------------------------------------------------------|-----------|-----------|
| TS1 <sub>CH3OH</sub>         | 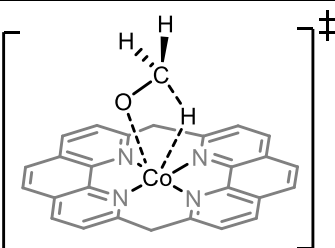 |          |          |  |           |           |
| <b>Cartesian co-ordinate</b> |                                                                                   |          |          | <b>Frequencies</b>                                                                 |           |           |
| -----                        |                                                                                   |          |          |                                                                                    |           |           |
| Atoms                        | X                                                                                 | Y        | Z        |                                                                                    |           |           |
| -----                        |                                                                                   |          |          |                                                                                    |           |           |
| C                            | -2.32373                                                                          | -3.42218 | -0.54530 | -428.2156                                                                          | 46.5474   | 62.6802   |
| C                            | -3.54670                                                                          | -2.85228 | -0.71284 | 64.8823                                                                            | 96.3888   | 99.5144   |
| C                            | -3.70223                                                                          | -1.43630 | -0.59209 | 126.1851                                                                           | 134.9340  | 153.2219  |
| C                            | -2.52966                                                                          | -0.71963 | -0.33489 | 179.9826                                                                           | 205.7392  | 220.1403  |
| C                            | -1.14997                                                                          | -2.62417 | -0.27438 | 245.3568                                                                           | 249.5581  | 255.1968  |
| C                            | -4.93586                                                                          | -0.73238 | -0.69772 | 263.5398                                                                           | 266.1041  | 291.9414  |
| C                            | -2.58783                                                                          | 0.69030  | -0.13762 | 323.1519                                                                           | 330.5082  | 335.4378  |
| C                            | -3.79802                                                                          | 1.37383  | -0.28570 | 376.1399                                                                           | 381.2453  | 396.0158  |
| C                            | -4.98189                                                                          | 0.62981  | -0.55924 | 402.0033                                                                           | 417.4554  | 445.7332  |
| C                            | -3.72552                                                                          | 2.79707  | -0.16454 | 455.5745                                                                           | 458.7726  | 462.5249  |
| H                            | -4.63756                                                                          | 3.38363  | -0.23731 | 470.1953                                                                           | 487.4914  | 489.5810  |
| C                            | -2.52119                                                                          | 3.41098  | -0.01149 | 493.0085                                                                           | 528.4040  | 544.0704  |
| C                            | -1.29864                                                                          | 2.64792  | 0.07929  | 556.8404                                                                           | 582.6428  | 586.2363  |
| H                            | -5.84240                                                                          | -1.29582 | -0.89809 | 591.0521                                                                           | 595.1497  | 598.3740  |
| H                            | -2.19984                                                                          | -4.49799 | -0.61040 | 618.5078                                                                           | 625.0149  | 674.3816  |
| H                            | -4.41822                                                                          | -3.46682 | -0.92221 | 683.5350                                                                           | 684.1627  | 710.9637  |
| H                            | -5.92289                                                                          | 1.16265  | -0.65804 | 713.0771                                                                           | 720.9077  | 729.5092  |
| H                            | -2.44694                                                                          | 4.49283  | 0.01804  | 738.6022                                                                           | 744.0375  | 751.8368  |
| N                            | -1.29562                                                                          | -1.28545 | -0.24531 | 757.5982                                                                           | 766.3772  | 807.0778  |
| N                            | -1.40242                                                                          | 1.30555  | 0.14538  | 809.8495                                                                           | 817.6959  | 821.2979  |
| Co                           | 0.03358                                                                           | 0.03366  | 0.41991  | 848.4939                                                                           | 855.5725  | 858.2385  |
| C                            | 2.63968                                                                           | -0.65685 | -0.10401 | 861.3512                                                                           | 864.4892  | 871.5222  |
| C                            | 1.33198                                                                           | -2.60901 | 0.04761  | 910.1888                                                                           | 922.2831  | 934.0455  |
|                              |                                                                                   |          |          | 945.2002                                                                           | 947.0298  | 963.3585  |
|                              |                                                                                   |          |          | 967.7304                                                                           | 1006.8009 | 1007.7884 |
|                              |                                                                                   |          |          | 1008.9040                                                                          | 1009.9674 | 1012.3664 |
|                              |                                                                                   |          |          | 1038.9332                                                                          | 1117.4421 | 1135.6330 |
|                              |                                                                                   |          |          | 1140.6651                                                                          | 1154.7637 | 1167.1519 |

|   |          |          |          |           |           |           |
|---|----------|----------|----------|-----------|-----------|-----------|
| C | 2.58828  | 0.75237  | -0.27164 | 1168.3965 | 1179.3700 | 1181.6310 |
| C | 3.85118  | -1.33718 | -0.25668 | 1231.0012 | 1236.8324 | 1241.2914 |
| C | 2.56237  | -3.37188 | -0.03317 | 1242.8951 | 1245.8238 | 1252.1554 |
| C | 3.75828  | 1.47904  | -0.50482 | 1256.3574 | 1257.0990 | 1274.7542 |
| C | 5.03275  | -0.58912 | -0.51094 | 1297.5228 | 1300.7601 | 1327.4504 |
| C | 3.77085  | -2.76584 | -0.15865 | 1384.8326 | 1397.3642 | 1413.1342 |
| H | 2.48301  | -4.45389 | -0.02202 | 1417.2441 | 1423.8572 | 1447.5303 |
| C | 3.59781  | 2.89936  | -0.59748 | 1452.2826 | 1469.7114 | 1473.9337 |
| C | 4.98964  | 0.77839  | -0.62361 | 1479.5031 | 1481.6863 | 1484.3098 |
| C | 1.19043  | 2.66418  | -0.18544 | 1486.7217 | 1489.1788 | 1521.7111 |
| H | 5.97419  | -1.11939 | -0.61955 | 1538.2743 | 1568.9983 | 1575.7215 |
| H | 4.68063  | -3.35611 | -0.22745 | 1579.9998 | 1592.3706 | 1624.2480 |
| C | 2.37358  | 3.46215  | -0.43116 | 1639.8092 | 1662.5970 | 1689.3966 |
| H | 4.46875  | 3.52107  | -0.78670 | 1697.6202 | 1706.4556 | 1713.2936 |
| H | 5.89630  | 1.34398  | -0.81614 | 1720.7469 | 1748.1341 | 2991.9703 |
| H | 2.24710  | 4.53856  | -0.47523 | 3069.0133 | 3199.3457 | 3199.4840 |
| N | 1.44728  | -1.26413 | 0.16513  | 3202.2918 | 3202.8314 | 3203.6435 |
| N | 1.34450  | 1.31721  | -0.18350 | 3205.4698 | 3216.0902 | 3216.2848 |
| O | -0.82424 | -0.80145 | 2.30643  | 3223.7971 | 3224.9709 | 3226.6159 |
| C | -0.04545 | 0.03490  | 2.80919  | 3227.8365 | 3230.0988 | 3231.0179 |
| H | -0.41890 | 1.01227  | 3.16196  |           |           |           |
| H | 0.93076  | -0.27863 | 3.21800  |           |           |           |
| H | 0.64233  | 0.71386  | 1.61091  |           |           |           |
| C | 0.09497  | -3.25396 | -0.06640 |           |           |           |
| H | 0.10971  | -4.33588 | -0.12137 |           |           |           |
| C | -0.04564 | 3.29229  | 0.02747  |           |           |           |
| H | -0.05196 | 4.37514  | 0.00208  |           |           |           |

### Statistical Thermodynamic Analysis

Temperature = 403.15 K

Pressure = 1 atm

Zero-point correction = 0.377353

Electronic Energy = -1477.90219699

Internal Energy (E) = -1477.48313999

Enthalpy (H) = -1477.48186299

Gibbs Free Energy (G) = -1477.60243499

Gibbs Free Energy of Solvation = -1478.02484776

| St. Pt.                      | General Structure                                                                   | Ball & Stick model                                                                   |
|------------------------------|-------------------------------------------------------------------------------------|--------------------------------------------------------------------------------------|
| I3 <sub>CH3OH</sub>          | 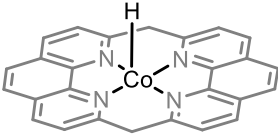 |  |
| <b>Cartesian co-ordinate</b> |                                                                                     | <b>Frequencies</b>                                                                   |
| -----                        |                                                                                     |                                                                                      |
| Atoms                        | X                                                                                   | Y                                                                                    |
|                              |                                                                                     | Z                                                                                    |
|                              |                                                                                     | 39.8148                                                                              |
|                              |                                                                                     | 50.6518                                                                              |
|                              |                                                                                     | 59.1826                                                                              |
|                              |                                                                                     | 70.4382                                                                              |
|                              |                                                                                     | 98.1882                                                                              |
|                              |                                                                                     | 111.0570                                                                             |
|                              |                                                                                     | 116.9087                                                                             |
|                              |                                                                                     | 140.4088                                                                             |
|                              |                                                                                     | 154.0518                                                                             |
|                              |                                                                                     | 161.0753                                                                             |
|                              |                                                                                     | 173.0031                                                                             |
|                              |                                                                                     | 216.5580                                                                             |



|                                           |          |          |          |           |           |           |
|-------------------------------------------|----------|----------|----------|-----------|-----------|-----------|
|                                           |          |          |          | 242.5969  | 248.1655  | 257.3115  |
|                                           |          |          |          | 258.7696  | 263.1638  | 284.1412  |
| C                                         | -2.55968 | -3.08187 | -0.59628 | 302.5174  | 312.0598  | 335.7914  |
| C                                         | -3.73526 | -2.39888 | -0.61488 | 340.1040  | 351.3689  | 384.3055  |
| C                                         | -3.74606 | -0.97015 | -0.50823 | 405.3442  | 407.4793  | 410.8672  |
| C                                         | -2.49289 | -0.36570 | -0.39390 | 449.2526  | 461.3802  | 462.9278  |
| C                                         | -1.29066 | -2.40370 | -0.46021 | 478.4085  | 487.3078  | 487.8316  |
| C                                         | -4.90423 | -0.14417 | -0.51164 | 493.8049  | 496.1752  | 538.4476  |
| C                                         | -2.38255 | 1.04769  | -0.27343 | 559.5572  | 583.9113  | 586.7868  |
| C                                         | -3.52822 | 1.84737  | -0.27376 | 596.3152  | 598.9560  | 599.8880  |
| C                                         | -4.79881 | 1.22050  | -0.39860 | 627.2279  | 680.0424  | 687.6906  |
| C                                         | -3.29661 | 3.25492  | -0.14157 | 689.0513  | 712.2788  | 716.4519  |
| H                                         | -4.14525 | 3.93347  | -0.13475 | 720.4865  | 737.0819  | 741.4498  |
| C                                         | -2.03019 | 3.73689  | -0.02331 | 750.0466  | 750.7672  | 755.0080  |
| C                                         | -0.88026 | 2.85915  | -0.02471 | 758.7122  | 766.1937  | 772.5860  |
| H                                         | -5.87941 | -0.61268 | -0.60311 | 817.2788  | 822.2097  | 828.8142  |
| H                                         | -2.54853 | -4.16423 | -0.66462 | 831.6784  | 853.1670  | 862.1559  |
| H                                         | -4.67842 | -2.93093 | -0.70079 | 865.3904  | 869.4405  | 870.3628  |
| H                                         | -5.68991 | 1.84104  | -0.40097 | 876.6653  | 908.4651  | 920.9036  |
| H                                         | -1.85150 | 4.80201  | 0.07965  | 945.0334  | 952.8002  | 976.3605  |
| N                                         | -1.31207 | -1.05281 | -0.37101 | 979.2426  | 1009.7680 | 1010.9145 |
| N                                         | -1.11216 | 1.53282  | -0.15719 | 1012.6503 | 1013.0086 | 1013.1416 |
| Co                                        | 0.16403  | 0.12236  | -0.10593 | 1043.6670 | 1117.7216 | 1138.5932 |
| C                                         | 2.71893  | -0.79204 | -0.12477 | 1145.1360 | 1158.5150 | 1170.7595 |
| C                                         | 1.21327  | -2.60737 | -0.31443 | 1171.4882 | 1182.8717 | 1184.7950 |
| C                                         | 2.82945  | 0.62292  | -0.01683 | 1207.7329 | 1234.4436 | 1239.5606 |
| C                                         | 3.86451  | -1.59165 | -0.12540 | 1243.6997 | 1246.7858 | 1259.3928 |
| C                                         | 2.36345  | -3.48535 | -0.31884 | 1260.2172 | 1278.0780 | 1280.3050 |
| C                                         | 4.08496  | 1.22652  | 0.08774  | 1300.4502 | 1303.9215 | 1330.0108 |
| C                                         | 5.13680  | -0.96421 | -0.02364 | 1384.5721 | 1395.8967 | 1418.0100 |
| C                                         | 3.63129  | -3.00162 | -0.23012 | 1424.9514 | 1428.7309 | 1452.7350 |
| H                                         | 2.18288  | -4.55234 | -0.39558 | 1459.9909 | 1467.3057 | 1478.3173 |
| C                                         | 4.07368  | 2.65544  | 0.19736  | 1480.5418 | 1482.5742 | 1484.0491 |
| C                                         | 5.24364  | 0.40133  | 0.07958  | 1486.1769 | 1519.2595 | 1534.1531 |
| C                                         | 1.62426  | 2.65611  | 0.09147  | 1551.3091 | 1571.7692 | 1573.6451 |
| H                                         | 6.02780  | -1.58490 | -0.02813 | 1578.6483 | 1627.8320 | 1636.1153 |
| H                                         | 4.47975  | -3.68040 | -0.23595 | 1658.7706 | 1684.3823 | 1699.6828 |
| C                                         | 2.89667  | 3.33673  | 0.19976  | 1707.1863 | 1712.3641 | 1720.4987 |
| H                                         | 5.01706  | 3.18825  | 0.28124  | 1889.6886 | 2138.6430 | 2967.0479 |
| H                                         | 6.22004  | 0.87011  | 0.15813  | 3042.0742 | 3200.6770 | 3202.8027 |
| H                                         | 2.88452  | 4.41805  | 0.28660  | 3203.2144 | 3205.3473 | 3210.8228 |
| N                                         | 1.44818  | -1.27788 | -0.22183 | 3215.6443 | 3223.1417 | 3223.5764 |
| N                                         | 1.65017  | 1.30820  | -0.02323 | 3225.8071 | 3227.4971 | 3229.3100 |
| O                                         | -2.91189 | -2.17662 | 2.48509  | 3231.3269 | 3231.6550 | 3233.2827 |
| C                                         | -1.93353 | -1.47611 | 2.49409  |           |           |           |
| H                                         | -2.00104 | -0.36955 | 2.51568  |           |           |           |
| H                                         | -0.90744 | -1.89405 | 2.46784  |           |           |           |
| H                                         | 0.10284  | 0.03344  | 1.27360  |           |           |           |
| C                                         | -0.08808 | -3.13351 | -0.41266 |           |           |           |
| H                                         | -0.17238 | -4.21162 | -0.48228 |           |           |           |
| C                                         | 0.42002  | 3.38282  | 0.10021  |           |           |           |
| H                                         | 0.50286  | 4.45896  | 0.19774  |           |           |           |
| <b>Statistical Thermodynamic Analysis</b> |          |          |          |           |           |           |

Temperature = 403.15 K

Pressure = 1 atm

Zero-point correction = 0.379087

Electronic Energy = -1477.95831218

Internal Energy (E) = -1477.53615318

Enthalpy (H) = -1477.53487618

Gibbs Free Energy (G) = -1477.65980118

Gibbs Free Energy of Solvation = -1478.08123757

| St. Pt.                      | General Structure                                                                 | Ball & Stick model                                                                 |          |           |           |           |
|------------------------------|-----------------------------------------------------------------------------------|------------------------------------------------------------------------------------|----------|-----------|-----------|-----------|
| I1 <sub>CD3OD</sub>          | 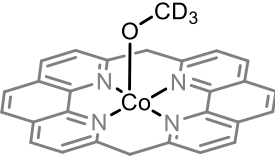 |  |          |           |           |           |
| <b>Cartesian co-ordinate</b> |                                                                                   | <b>Frequencies</b>                                                                 |          |           |           |           |
| -----                        |                                                                                   |                                                                                    |          |           |           |           |
| Atoms                        | X                                                                                 | Y                                                                                  | Z        |           |           |           |
| -----                        |                                                                                   |                                                                                    |          |           |           |           |
| C                            | 2.49772                                                                           | 3.45629                                                                            | -0.09828 | 47.6996   | 63.0705   | 74.5665   |
| C                            | 3.72232                                                                           | 2.86538                                                                            | -0.11575 | 93.1005   | 103.7537  | 129.2899  |
| C                            | 3.83659                                                                           | 1.43821                                                                            | -0.15172 | 130.6778  | 170.2326  | 184.7294  |
| C                            | 2.62717                                                                           | 0.73807                                                                            | -0.17731 | 196.8599  | 216.7227  | 229.2987  |
| C                            | 1.27999                                                                           | 2.67650                                                                            | -0.12043 | 242.1587  | 254.1476  | 257.3864  |
| C                            | 5.05319                                                                           | 0.70243                                                                            | -0.16109 | 272.9698  | 279.2026  | 283.3611  |
| C                            | 2.62249                                                                           | -0.68522                                                                           | -0.19654 | 306.2084  | 340.2618  | 349.0215  |
| C                            | 3.82581                                                                           | -1.39621                                                                           | -0.20446 | 357.8710  | 384.7328  | 404.8070  |
| C                            | 5.04871                                                                           | -0.67082                                                                           | -0.18891 | 410.2052  | 412.2452  | 449.2100  |
| C                            | 3.70037                                                                           | -2.82202                                                                           | -0.22908 | 461.9880  | 470.5683  | 478.0702  |
| H                            | 4.59838                                                                           | -3.43371                                                                           | -0.23744 | 482.0795  | 486.0892  | 495.8377  |
| C                            | 2.47138                                                                           | -3.40510                                                                           | -0.24034 | 497.2525  | 540.6992  | 557.8774  |
| C                            | 1.26078                                                                           | -2.61595                                                                           | -0.22335 | 584.4280  | 585.3919  | 587.4109  |
| H                            | 5.99262                                                                           | 1.24694                                                                            | -0.14603 | 595.4846  | 597.2872  | 600.6538  |
| H                            | 2.40490                                                                           | 4.53640                                                                            | -0.05890 | 627.2007  | 680.6346  | 686.6855  |
| H                            | 4.62488                                                                           | 3.47004                                                                            | -0.09584 | 689.9337  | 712.7193  | 716.8196  |
| H                            | 5.98382                                                                           | -1.22265                                                                           | -0.19756 | 721.0584  | 743.0214  | 746.4182  |
| H                            | 2.37047                                                                           | -4.48503                                                                           | -0.25644 | 752.0577  | 759.4207  | 766.3387  |
| N                            | 1.40386                                                                           | 1.33352                                                                            | -0.18932 | 768.0179  | 813.9367  | 820.2974  |
| N                            | 1.39273                                                                           | -1.27186                                                                           | -0.21045 | 825.6386  | 828.6643  | 856.3219  |
| Co                           | 0.01374                                                                           | 0.03771                                                                            | -0.01289 | 861.8568  | 865.4841  | 868.9101  |
| C                            | -2.59670                                                                          | 0.75934                                                                            | -0.19670 | 870.3166  | 878.2197  | 908.9827  |
| C                            | -1.23214                                                                          | 2.68655                                                                            | -0.12169 | 921.4895  | 922.8190  | 942.9959  |
| C                            | -2.60302                                                                          | -0.66292                                                                           | -0.22967 | 947.5243  | 951.3608  | 969.9560  |
| C                            | -3.80051                                                                          | 1.46977                                                                            | -0.17814 | 970.6729  | 1013.0414 | 1015.8379 |
| C                            | -2.44454                                                                          | 3.47611                                                                            | -0.10670 | 1016.5589 | 1017.5502 | 1018.0563 |
| C                            | -3.81159                                                                          | -1.36430                                                                           | -0.24610 | 1045.3731 | 1056.9218 | 1075.5889 |
| C                            | -5.02217                                                                          | 0.74433                                                                            | -0.20111 | 1091.3453 | 1122.0385 | 1136.0374 |
| C                            | -3.67384                                                                          | 2.89627                                                                            | -0.13419 | 1142.9624 | 1161.0341 | 1169.4150 |
|                              |                                                                                   |                                                                                    |          | 1173.7557 | 1182.6632 | 1186.0931 |
|                              |                                                                                   |                                                                                    |          | 1199.6577 | 1235.9321 | 1241.5781 |
|                              |                                                                                   |                                                                                    |          | 1245.2639 | 1248.6102 | 1258.1903 |
|                              |                                                                                   |                                                                                    |          | 1258.7050 | 1279.3957 | 1301.4534 |

|   |          |          |          |           |           |           |
|---|----------|----------|----------|-----------|-----------|-----------|
| H | -2.34271 | 4.55539  | -0.06586 | 1305.2442 | 1330.7430 | 1388.7936 |
| C | -3.69635 | -2.79221 | -0.27271 | 1398.9145 | 1421.7319 | 1428.8172 |
| C | -5.02818 | -0.62951 | -0.23483 | 1436.0610 | 1455.5194 | 1459.8681 |
| C | -1.25380 | -2.60466 | -0.24528 | 1467.9380 | 1477.4137 | 1484.0643 |
| H | -5.95745 | 1.29601  | -0.19031 | 1485.3296 | 1486.6791 | 1486.9914 |
| H | -4.57119 | 3.50873  | -0.11884 | 1521.7788 | 1537.5791 | 1572.0626 |
| C | -2.47207 | -3.38361 | -0.27490 | 1573.6080 | 1577.9776 | 1629.1145 |
| H | -4.59875 | -3.39726 | -0.28832 | 1639.2871 | 1664.6901 | 1684.5718 |
| H | -5.96770 | -1.17365 | -0.25159 | 1704.4281 | 1705.8879 | 1714.9147 |
| H | -2.37934 | -4.46432 | -0.29046 | 1724.6773 | 2140.7206 | 2255.2773 |
| N | -1.36676 | 1.34309  | -0.18724 | 2273.8974 | 3200.0007 | 3200.0970 |
| N | -1.37514 | -1.25739 | -0.23673 | 3214.3824 | 3214.8110 | 3215.6381 |
| O | 0.09888  | 0.15163  | 1.80089  | 3215.9907 | 3216.4972 | 3216.6226 |
| C | -0.37439 | -0.94752 | 2.51039  | 3223.5359 | 3224.8970 | 3231.5982 |
| H | 0.06711  | -1.90363 | 2.18179  | 3232.6672 | 3232.8718 | 3233.8212 |
| C | 0.02546  | 3.31127  | -0.08251 |           |           |           |
| H | 0.02975  | 4.39370  | -0.03186 |           |           |           |
| C | -0.00127 | -3.24209 | -0.22107 |           |           |           |
| H | -0.00627 | -4.32567 | -0.22597 |           |           |           |
| H | -1.47230 | -1.05130 | 2.47313  |           |           |           |
| H | -0.08945 | -0.80326 | 3.56234  |           |           |           |

### Statistical Thermodynamic Analysis

Temperature = 403.15 K

Pressure=1 atm

Zero-point correction = 0.374671

Electronic Energy = -1477.97812360

Internal Energy (E) = -1477.5612336

Enthalpy (H) = -1477.5599566

Gibbs Free Energy (G) = -1477.6812716

Gibbs Free Energy of Solvation = -1478.10141818

| St. Pt.               | General Structure                                                                   | Ball & Stick model                                                                   |          |           |          |          |
|-----------------------|-------------------------------------------------------------------------------------|--------------------------------------------------------------------------------------|----------|-----------|----------|----------|
| TS1 <sub>CD3OD</sub>  | 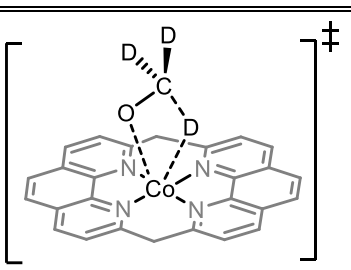 |  |          |           |          |          |
| Cartesian co-ordinate |                                                                                     | Frequencies                                                                          |          |           |          |          |
| -----                 |                                                                                     |                                                                                      |          |           |          |          |
| Atoms                 | X                                                                                   | Y                                                                                    | Z        | -403.7652 | 46.4203  | 59.9185  |
|                       |                                                                                     |                                                                                      |          | 63.0826   | 93.0211  | 99.1604  |
|                       |                                                                                     |                                                                                      |          | 121.1746  | 126.5097 | 152.8622 |
|                       |                                                                                     |                                                                                      |          | 178.3722  | 205.6959 | 218.8336 |
|                       |                                                                                     |                                                                                      |          | 243.6852  | 249.2653 | 255.0355 |
| C                     | -2.32343                                                                            | -3.42232                                                                             | -0.54489 | 262.3348  | 265.8420 | 291.3102 |
| C                     | -3.54635                                                                            | -2.85241                                                                             | -0.71281 | 314.3534  | 324.6154 | 332.6246 |
| C                     | -3.70182                                                                            | -1.43639                                                                             | -0.59252 | 361.7189  | 378.6742 | 386.1735 |
| C                     | -2.52925                                                                            | -0.71970                                                                             | -0.33537 | 399.5429  | 408.0579 | 410.6259 |
| C                     | -1.14969                                                                            | -2.62427                                                                             | -0.27411 |           |          |          |

|    |          |          |          |           |           |           |
|----|----------|----------|----------|-----------|-----------|-----------|
| C  | -4.93543 | -0.73247 | -0.69841 | 444.9719  | 457.8059  | 458.1410  |
| C  | -2.58744 | 0.69027  | -0.13826 | 463.3234  | 471.3058  | 486.4710  |
| C  | -3.79762 | 1.37377  | -0.28654 | 489.6864  | 494.2161  | 497.6071  |
| C  | -4.98146 | 0.62973  | -0.56014 | 538.8740  | 555.9885  | 582.0607  |
| C  | -3.72518 | 2.79701  | -0.16531 | 586.2331  | 590.8926  | 595.8149  |
| H  | -4.63723 | 3.38354  | -0.23828 | 598.1292  | 623.9557  | 673.5513  |
| C  | -2.52093 | 3.41096  | -0.01187 | 677.7121  | 683.4306  | 684.6861  |
| C  | -1.29838 | 2.64794  | 0.07918  | 710.9723  | 713.0257  | 720.7994  |
| H  | -5.84196 | -1.29594 | -0.89876 | 729.1554  | 738.5301  | 743.9510  |
| H  | -2.19960 | -4.49817 | -0.60956 | 751.7871  | 757.3515  | 766.2217  |
| H  | -4.41788 | -3.46697 | -0.92208 | 807.0767  | 809.9003  | 817.6588  |
| H  | -5.92245 | 1.16257  | -0.65909 | 821.1897  | 848.5208  | 855.6779  |
| H  | -2.44672 | 4.49281  | 0.01779  | 857.9481  | 861.3229  | 864.4555  |
| N  | -1.29525 | -1.28554 | -0.24557 | 871.5075  | 910.2230  | 922.5402  |
| N  | -1.40210 | 1.30555  | 0.14491  | 933.9423  | 937.5143  | 948.0915  |
| Co | 0.03377  | 0.03359  | 0.42022  | 963.3641  | 967.7128  | 975.3802  |
| C  | 2.63990  | -0.65693 | -0.10364 | 1006.8165 | 1007.7293 | 1008.8906 |
| C  | 1.33224  | -2.60908 | 0.04816  | 1009.9314 | 1012.2628 | 1038.9414 |
| C  | 2.58849  | 0.75228  | -0.27137 | 1103.9103 | 1117.3337 | 1135.4873 |
| C  | 3.85136  | -1.33728 | -0.25655 | 1140.6611 | 1154.8362 | 1167.2177 |
| C  | 2.56261  | -3.37197 | -0.03277 | 1168.4881 | 1179.2868 | 1180.5191 |
| C  | 3.75847  | 1.47891  | -0.50480 | 1184.0746 | 1231.5578 | 1237.0266 |
| C  | 5.03288  | -0.58926 | -0.51116 | 1242.9663 | 1246.0353 | 1256.2259 |
| C  | 3.77107  | -2.76594 | -0.15846 | 1257.0012 | 1274.7877 | 1297.3132 |
| H  | 2.48323  | -4.45398 | -0.02162 | 1300.7476 | 1327.4791 | 1384.7393 |
| C  | 3.59803  | 2.89924  | -0.59735 | 1397.4600 | 1413.1121 | 1417.4403 |
| C  | 4.98979  | 0.77824  | -0.62386 | 1423.8714 | 1447.5347 | 1452.2682 |
| C  | 1.19071  | 2.66412  | -0.18492 | 1470.5301 | 1474.3385 | 1479.5507 |
| H  | 5.97428  | -1.11957 | -0.61998 | 1483.4806 | 1484.3077 | 1486.7114 |
| H  | 4.68084  | -3.35620 | -0.22741 | 1521.6425 | 1538.5297 | 1569.0171 |
| C  | 2.37385  | 3.46206  | -0.43072 | 1575.6673 | 1579.6253 | 1607.8277 |
| H  | 4.46896  | 3.52093  | -0.78672 | 1624.2174 | 1639.7616 | 1662.6365 |
| H  | 5.89641  | 1.34381  | -0.81662 | 1689.3701 | 1697.6182 | 1706.4378 |
| H  | 2.24740  | 4.53848  | -0.47471 | 1713.4204 | 1720.9042 | 2169.2332 |
| N  | 1.44757  | -1.26421 | 0.16587  | 2290.0849 | 3199.3483 | 3199.4902 |
| N  | 1.34475  | 1.31716  | -0.18296 | 3202.3242 | 3202.7872 | 3203.6124 |
| O  | -0.82782 | -0.80004 | 2.30530  | 3205.4327 | 3216.1101 | 3216.2808 |
| C  | -0.04953 | 0.03588  | 2.80947  | 3223.7851 | 3224.9754 | 3226.6068 |
| H  | 0.64324  | 0.71234  | 1.61167  | 3227.8361 | 3230.0851 | 3231.0210 |
| C  | 0.09523  | -3.25404 | -0.06582 |           |           |           |
| H  | 0.10997  | -4.33598 | -0.12064 |           |           |           |
| C  | -0.04536 | 3.29229  | 0.02789  |           |           |           |
| H  | -0.05163 | 4.37514  | 0.00256  |           |           |           |
| H  | 0.92529  | -0.27818 | 3.22114  |           |           |           |
| H  | -0.42279 | 1.01416  | 3.15986  |           |           |           |

### Statistical Thermodynamic Analysis

Temperature = 403.15 K

Pressure = 1 atm

Zero-point correction = 0.368899

Electronic Energy = -1477.90219709

Internal Energy (E) = -1477.49076409

Enthalpy (H) = -1477.48948709

Gibbs Free Energy (G) = -1477.61165309

Gibbs Free Energy of Solvation = -1478.03405812

| St. Pt.                   | General Structure                                                                 | Ball & Stick model                                                                 |          |             |           |           |
|---------------------------|-----------------------------------------------------------------------------------|------------------------------------------------------------------------------------|----------|-------------|-----------|-----------|
| <b>I3<sub>CD3OD</sub></b> | 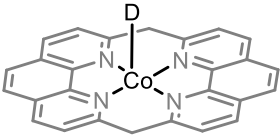 |  |          |             |           |           |
| Cartesian co-ordinate     |                                                                                   |                                                                                    |          | Frequencies |           |           |
| Atoms                     | X                                                                                 | Y                                                                                  | Z        |             |           |           |
|                           |                                                                                   |                                                                                    |          | 39.1317     | 50.1730   | 58.6440   |
|                           |                                                                                   |                                                                                    |          | 69.4475     | 97.0602   | 98.8183   |
|                           |                                                                                   |                                                                                    |          | 113.0724    | 139.9237  | 142.2881  |
|                           |                                                                                   |                                                                                    |          | 160.7899    | 167.3450  | 216.0004  |
| C                         | -2.55979                                                                          | -3.08172                                                                           | -0.59684 | 226.7988    | 241.6544  | 247.9751  |
| C                         | -3.73530                                                                          | -2.39864                                                                           | -0.61537 | 257.0178    | 258.6837  | 262.6103  |
| C                         | -3.74608                                                                          | -0.96991                                                                           | -0.50835 | 284.1404    | 302.5799  | 334.1795  |
| C                         | -2.49291                                                                          | -0.36551                                                                           | -0.39390 | 339.3422    | 348.1657  | 384.3018  |
| C                         | -1.29072                                                                          | -2.40365                                                                           | -0.46050 | 402.1257    | 405.2557  | 410.5513  |
| C                         | -4.90421                                                                          | -0.14390                                                                           | -0.51157 | 449.2502    | 455.0038  | 461.5296  |
| C                         | -2.38241                                                                          | 1.04786                                                                            | -0.27320 | 476.3895    | 486.8497  | 487.8233  |
| C                         | -3.52808                                                                          | 1.84755                                                                            | -0.27338 | 493.2384    | 495.6160  | 538.4100  |
| C                         | -4.79870                                                                          | 1.22076                                                                            | -0.39828 | 541.8210    | 547.2422  | 564.9951  |
| C                         | -3.29646                                                                          | 3.25510                                                                            | -0.14108 | 585.2466    | 586.8127  | 596.4232  |
| H                         | -4.14511                                                                          | 3.93363                                                                            | -0.13410 | 599.8856    | 604.6623  | 627.2242  |
| C                         | -2.03003                                                                          | 3.73704                                                                            | -0.02297 | 680.0420    | 687.7466  | 689.7214  |
| C                         | -0.88009                                                                          | 2.85929                                                                            | -0.02460 | 712.2803    | 716.7670  | 721.5496  |
| H                         | -5.87942                                                                          | -0.61233                                                                           | -0.60311 | 741.4119    | 744.5225  | 750.1551  |
| H                         | -2.54869                                                                          | -4.16406                                                                           | -0.66543 | 753.8468    | 766.1591  | 768.3297  |
| H                         | -4.67850                                                                          | -2.93059                                                                           | -0.70149 | 816.9092    | 822.1145  | 827.6276  |
| H                         | -5.68977                                                                          | 1.84133                                                                            | -0.40053 | 831.6642    | 853.1626  | 862.1509  |
| H                         | -1.85130                                                                          | 4.80215                                                                            | 0.08002  | 865.3079    | 869.3701  | 870.3532  |
| N                         | -1.31216                                                                          | -1.05277                                                                           | -0.37124 | 876.6594    | 908.4535  | 920.8963  |
| N                         | -1.11196                                                                          | 1.53298                                                                            | -0.15699 | 945.0251    | 952.6573  | 968.4144  |
| Co                        | 0.16380                                                                           | 0.12202                                                                            | -0.10583 | 976.3531    | 979.2468  | 1009.1262 |
| C                         | 2.71901                                                                           | -0.79202                                                                           | -0.12452 | 1009.9678   | 1010.9317 | 1012.6495 |
| C                         | 1.21327                                                                           | -2.60730                                                                           | -0.31431 | 1013.0188   | 1013.1661 | 1043.6641 |
| C                         | 2.82944                                                                           | 0.62294                                                                            | -0.01671 | 1117.7149   | 1128.3207 | 1138.5984 |
| C                         | 3.86455                                                                           | -1.59168                                                                           | -0.12515 | 1145.1445   | 1158.5198 | 1170.7732 |
| C                         | 2.36341                                                                           | -3.48532                                                                           | -0.31868 | 1171.5030   | 1182.8747 | 1184.7961 |
| C                         | 4.08497                                                                           | 1.22652                                                                            | 0.08767  | 1234.4453   | 1239.5651 | 1243.7033 |
| C                         | 5.13684                                                                           | -0.96422                                                                           | -0.02350 | 1246.7797   | 1259.3930 | 1260.2077 |
| C                         | 3.63127                                                                           | -3.00162                                                                           | -0.22987 | 1278.2482   | 1300.4032 | 1303.9095 |
| H                         | 2.18283                                                                           | -4.55231                                                                           | -0.39550 | 1330.0064   | 1384.5552 | 1395.8768 |
| C                         | 4.07375                                                                           | 2.65546                                                                            | 0.19693  | 1418.0081   | 1424.9495 | 1428.7356 |
| C                         | 5.24365                                                                           | 0.40132                                                                            | 0.07956  | 1452.7319   | 1459.9797 | 1467.3042 |
| C                         | 1.62431                                                                           | 2.65608                                                                            | 0.09124  | 1478.3147   | 1480.5496 | 1482.5523 |
| H                         | 6.02785                                                                           | -1.58490                                                                           | -0.02797 | 1484.0329   | 1485.6446 | 1517.9680 |
| H                         | 4.47970                                                                           | -3.68045                                                                           | -0.23566 | 1528.8640   | 1534.9516 | 1571.7797 |
| C                         | 2.89674                                                                           | 3.33672                                                                            | 0.19923  | 1573.5821   | 1578.6427 | 1627.8309 |
| H                         | 5.01714                                                                           | 3.18831                                                                            | 0.28060  | 1636.0976   | 1658.7759 | 1684.3871 |
| H                         | 6.22005                                                                           | 0.87013                                                                            | 0.15800  | 1699.6851   | 1707.1799 | 1712.3884 |

|   |          |          |          |           |           |           |
|---|----------|----------|----------|-----------|-----------|-----------|
| H | 2.88457  | 4.41807  | 0.28574  | 1720.4909 | 1831.0351 | 2175.3561 |
| N | 1.44830  | -1.27782 | -0.22152 | 2270.1754 | 3200.6772 | 3202.7953 |
| N | 1.65009  | 1.30813  | -0.02319 | 3203.2094 | 3205.3561 | 3210.7915 |
| O | -2.91182 | -2.17739 | 2.48439  | 3215.6690 | 3223.1391 | 3223.5819 |
| C | -1.93370 | -1.47655 | 2.49417  | 3225.7990 | 3227.5006 | 3229.3220 |
| H | 0.10209  | 0.03331  | 1.27368  | 3231.3123 | 3231.6469 | 3233.2891 |
| C | -0.08811 | -3.13339 | -0.41284 |           |           |           |
| H | -0.17236 | -4.21149 | -0.48259 |           |           |           |
| C | 0.42019  | 3.38294  | 0.10005  |           |           |           |
| H | 0.50312  | 4.45909  | 0.19743  |           |           |           |
| H | -0.90743 | -1.89411 | 2.46831  |           |           |           |
| H | -2.00164 | -0.37002 | 2.51601  |           |           |           |

#### Statistical Thermodynamic Analysis

Temperature = 403.15 K

Pressure = 1 atm

Zero-point correction = 0.370611

Electronic Energy = -1477.95831200

Internal Energy (E) = -1477.543836

Enthalpy (H) = -1477.542559

Gibbs Free Energy (G) = -1477.669198

Gibbs Free Energy of Solvation = -1478.0906332

## 12. Copies of $^1\text{H}$ and $^{13}\text{C}\{^1\text{H}\}$ NMR spectra of the amines:

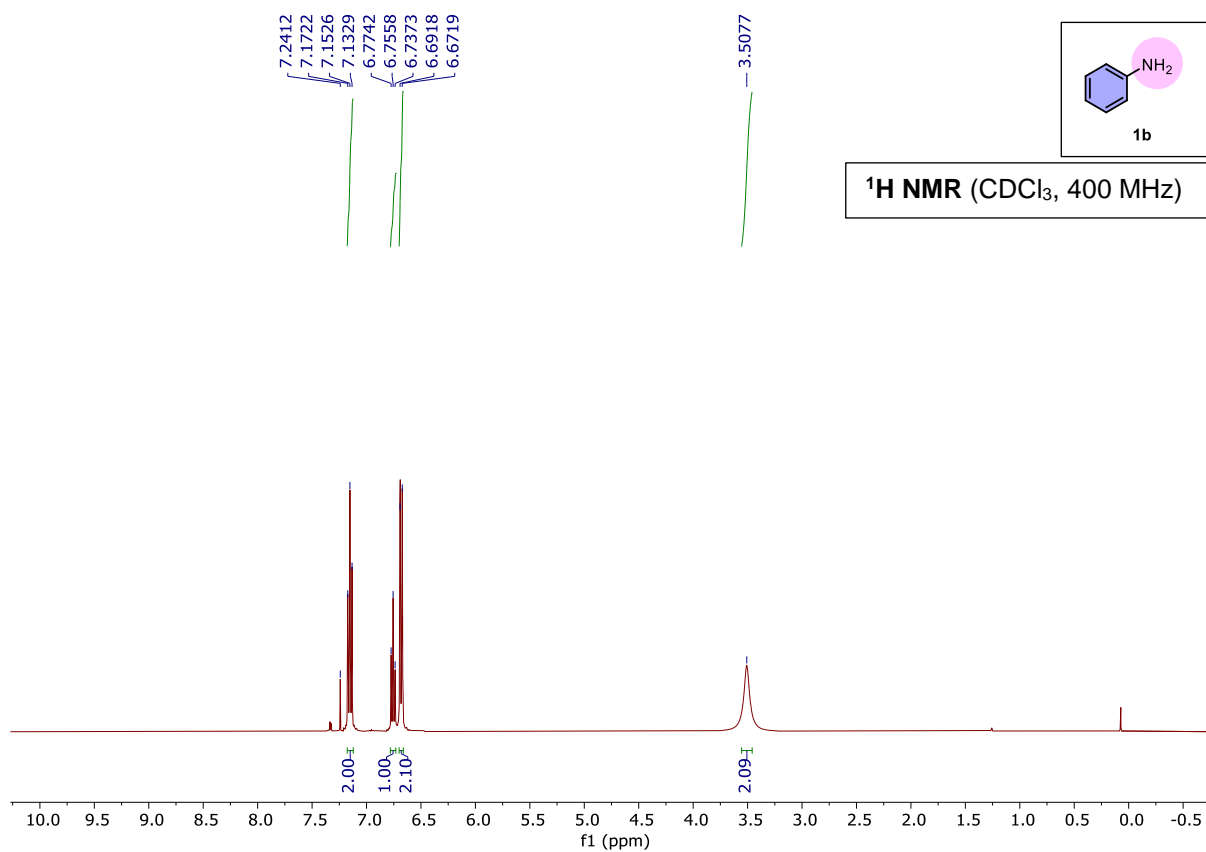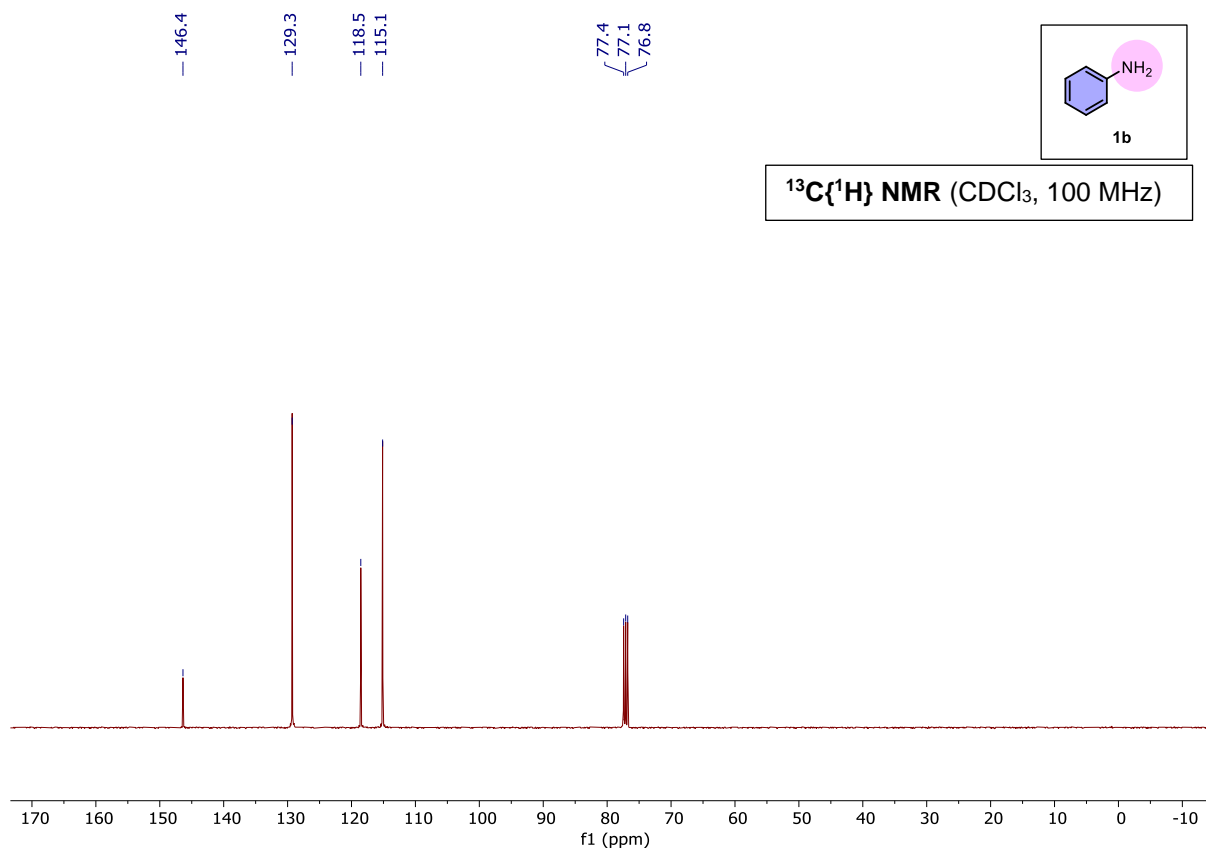

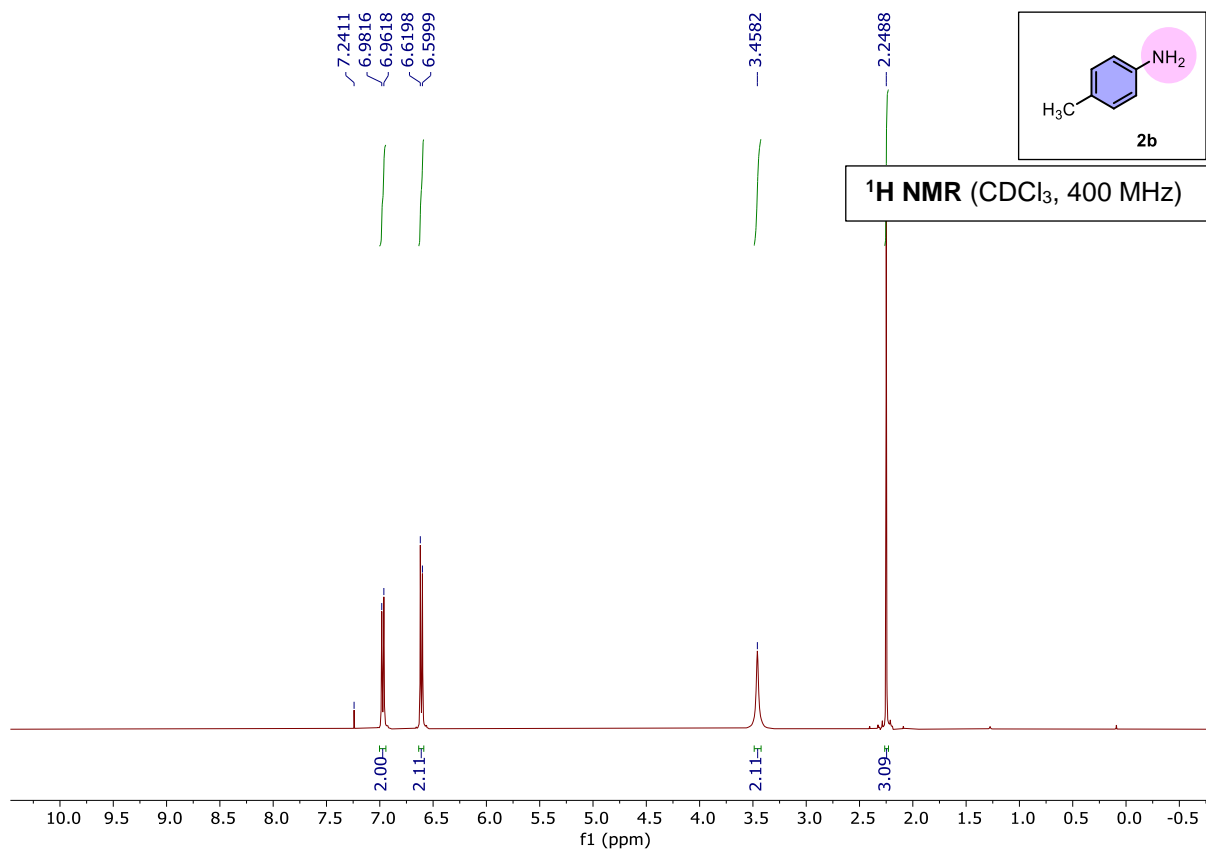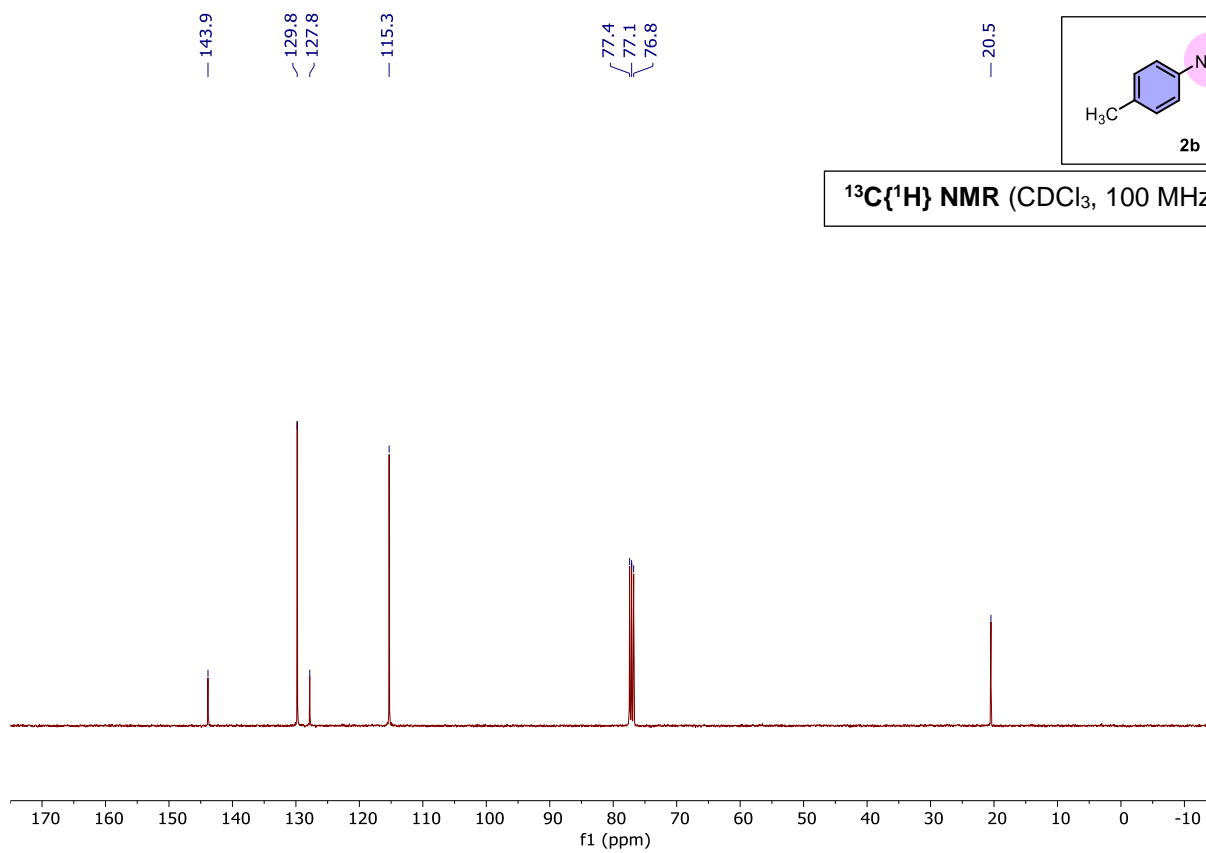



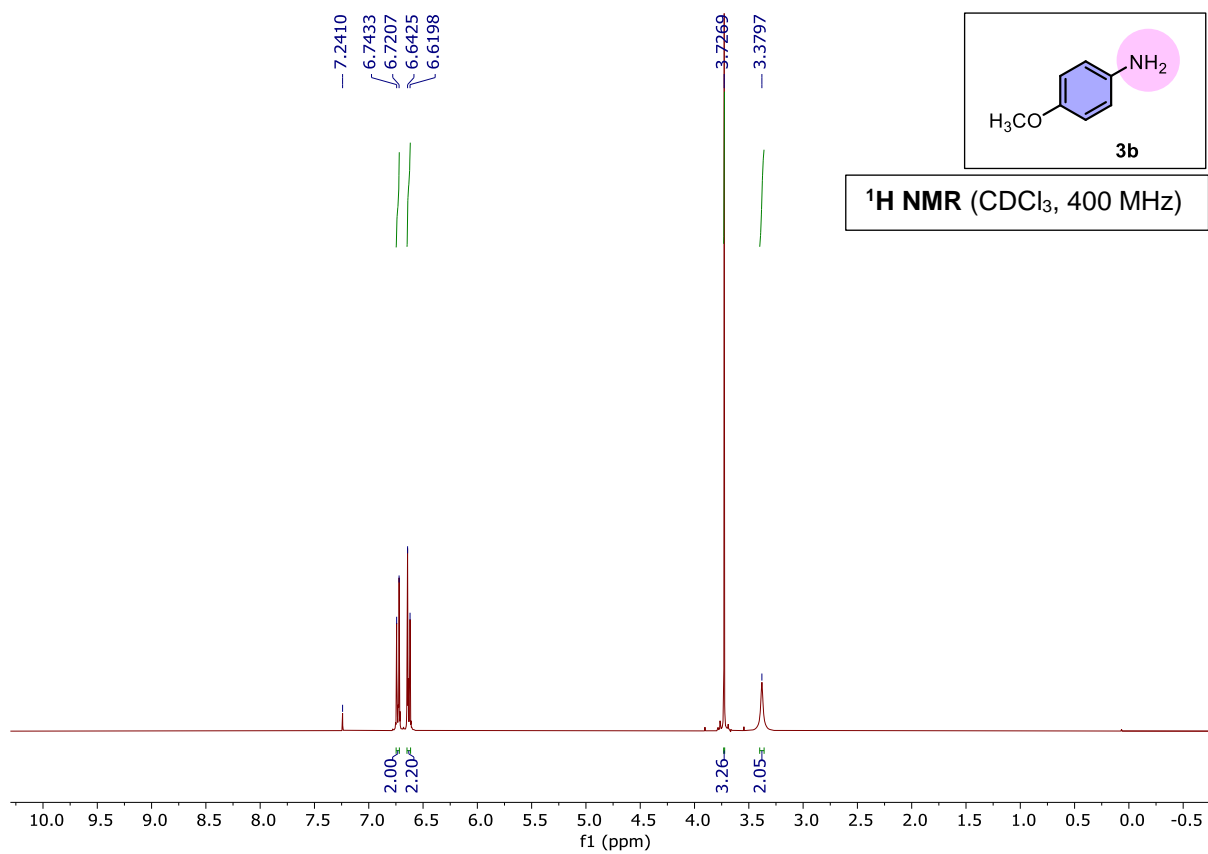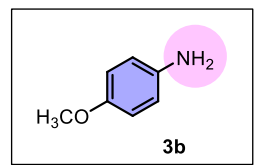

**<sup>1</sup>H NMR (CDCl<sub>3</sub>, 400 MHz)**

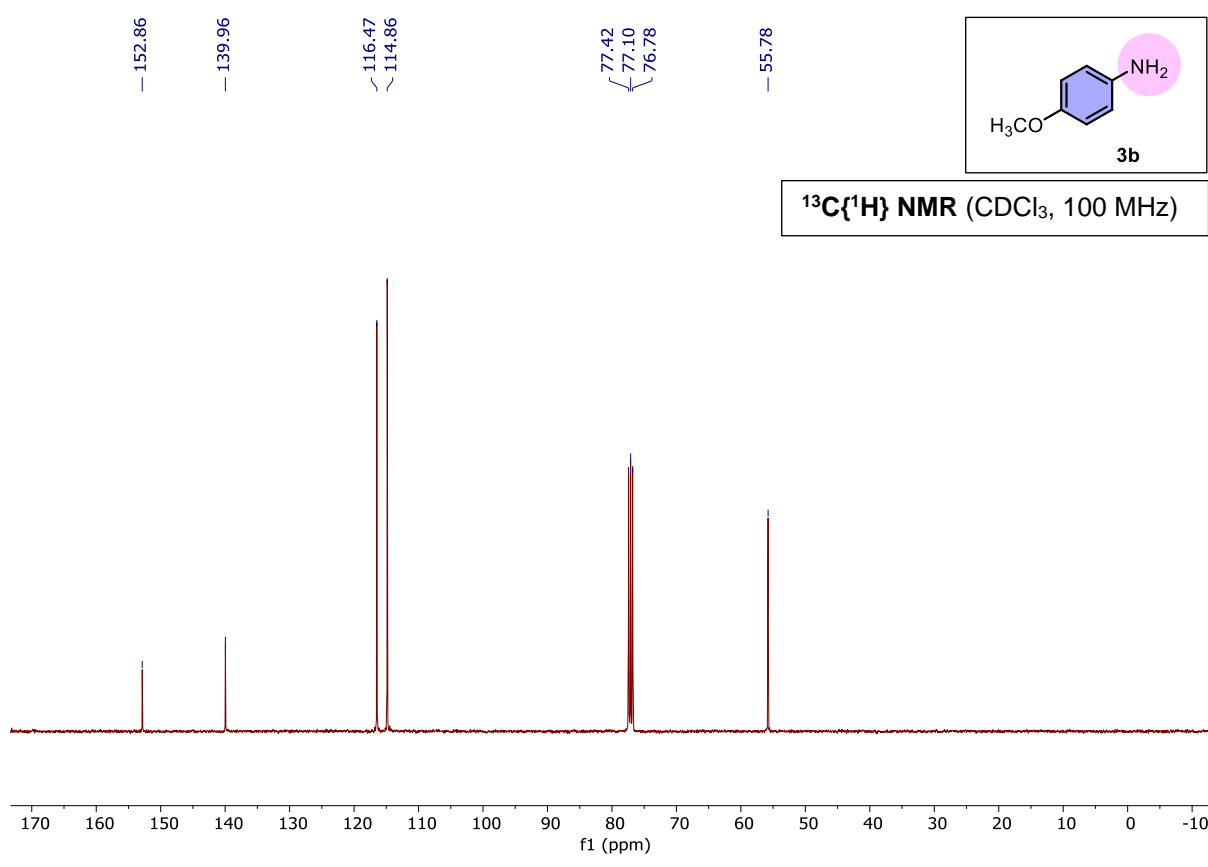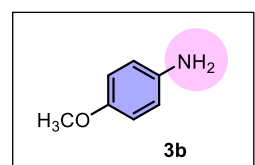

**<sup>13</sup>C{<sup>1</sup>H} NMR (CDCl<sub>3</sub>, 100 MHz)**

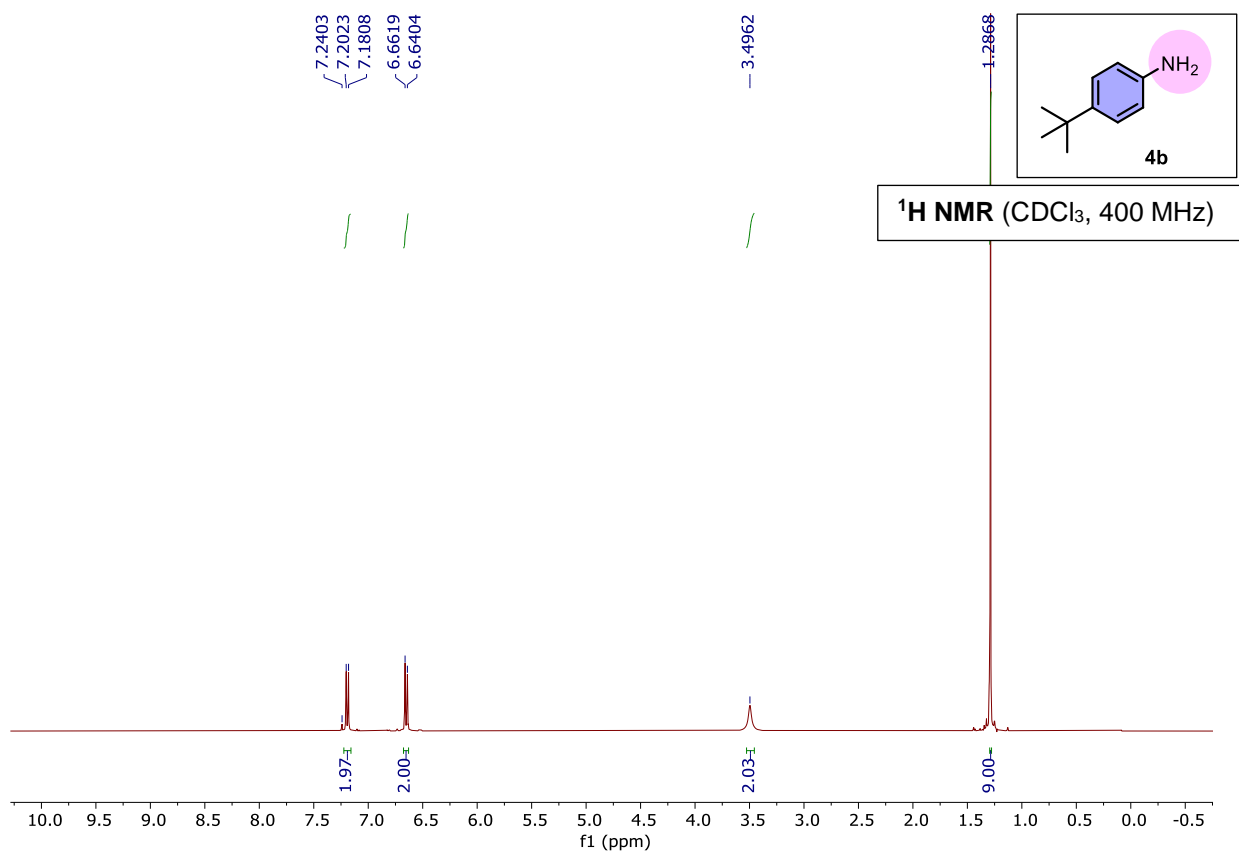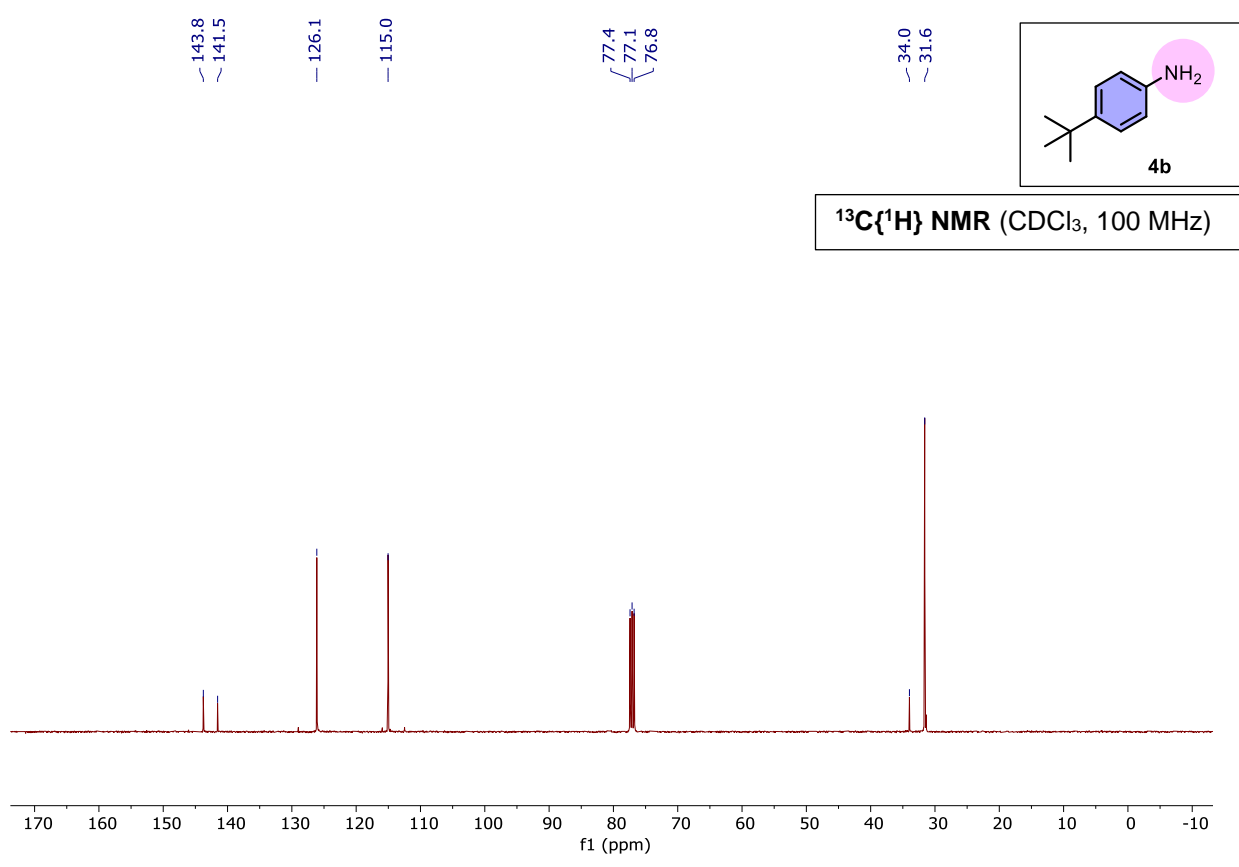

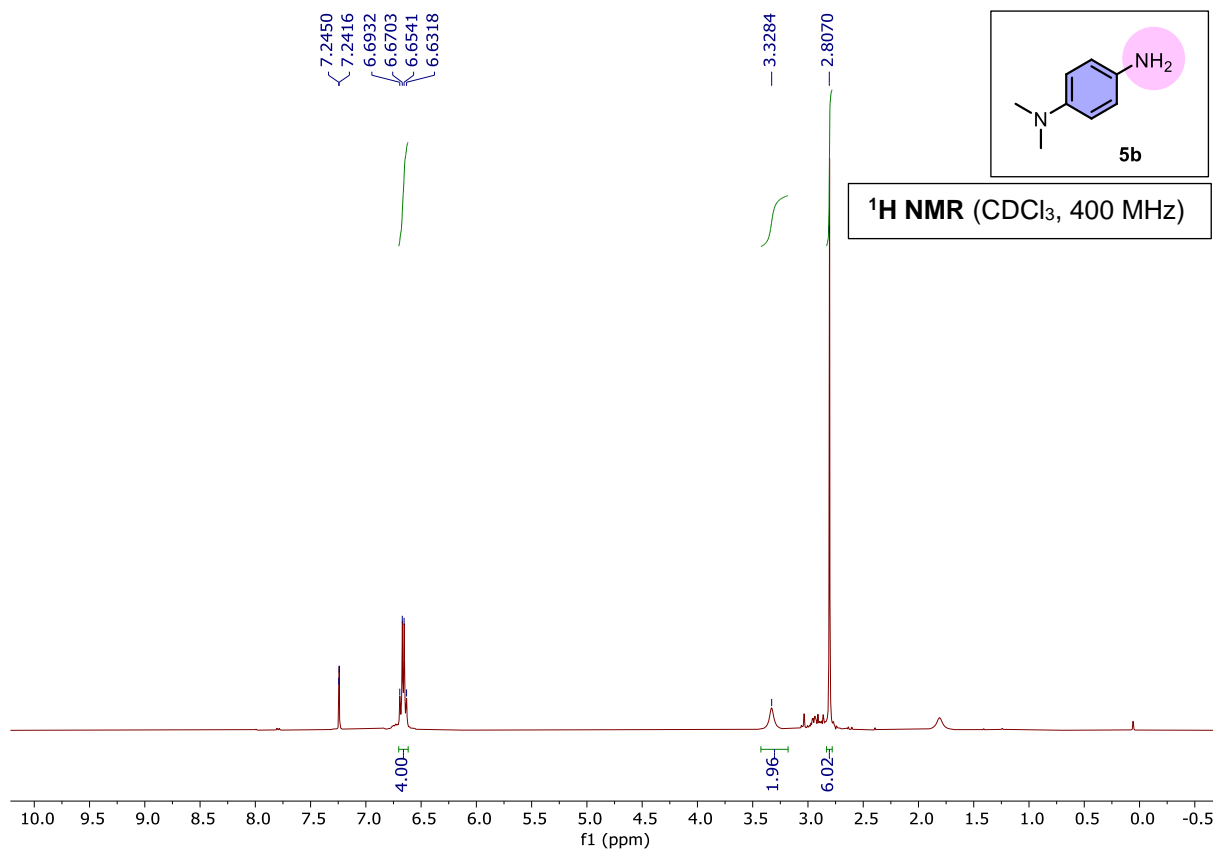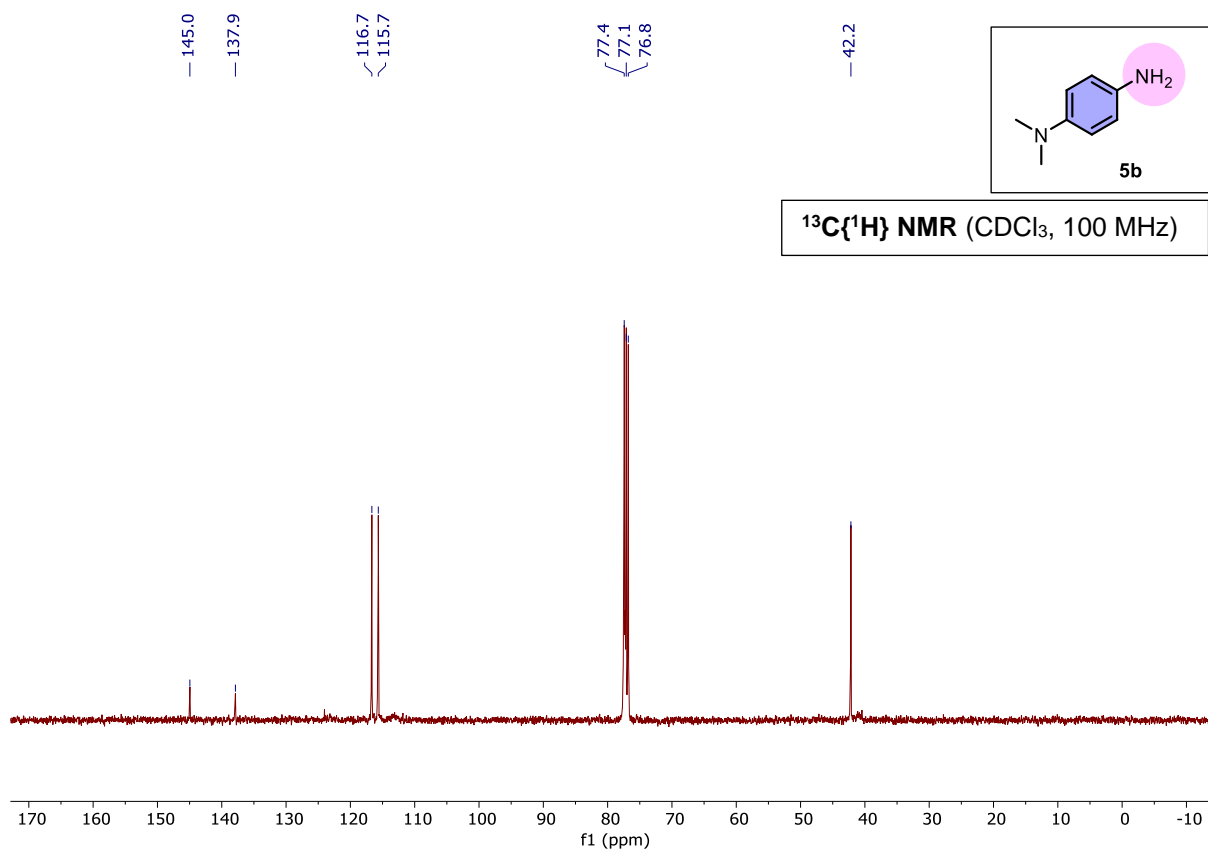

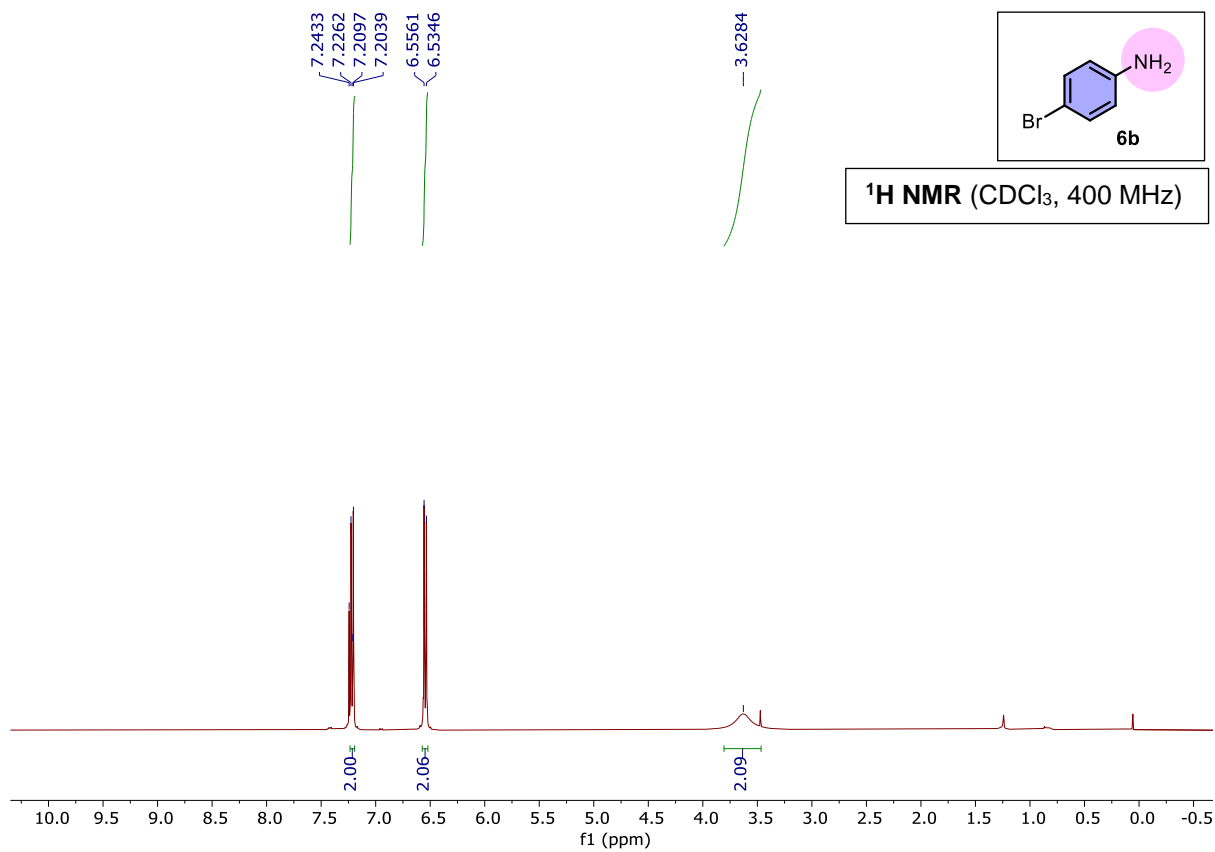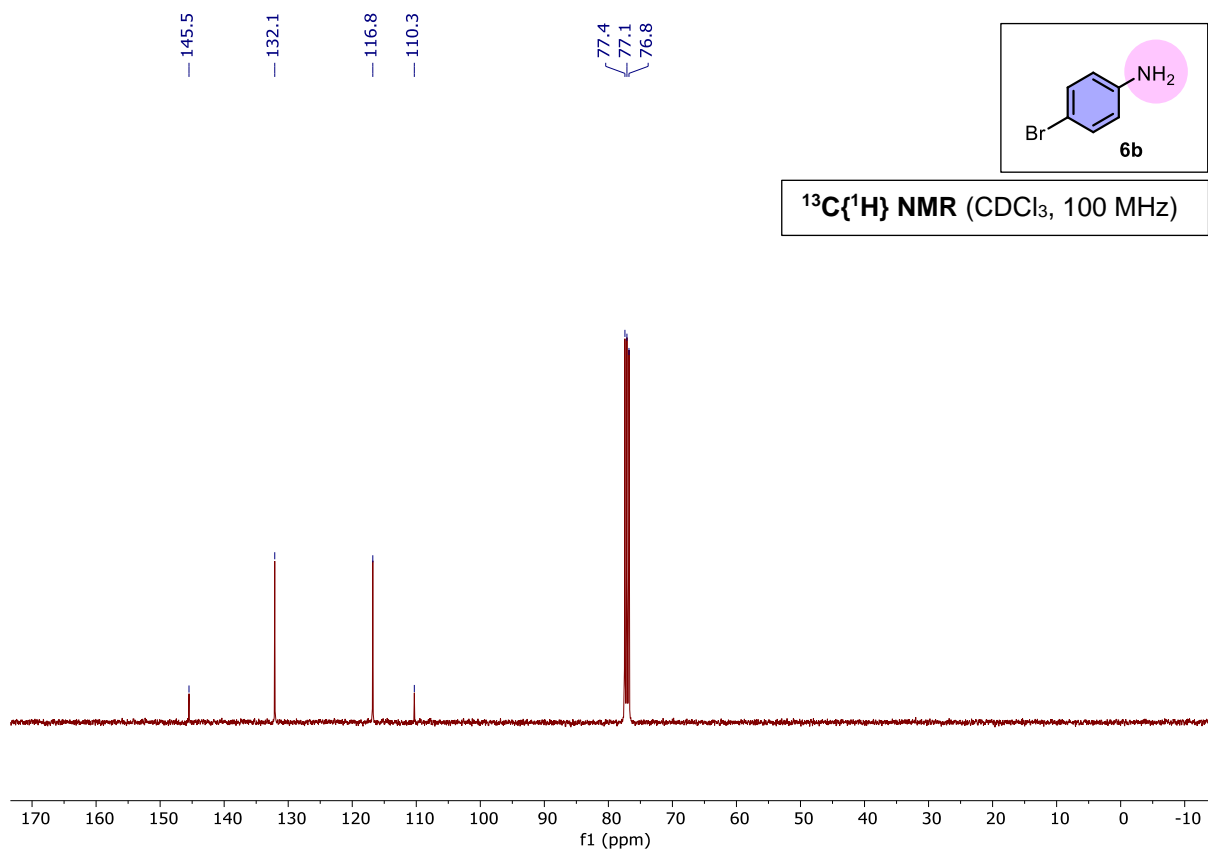

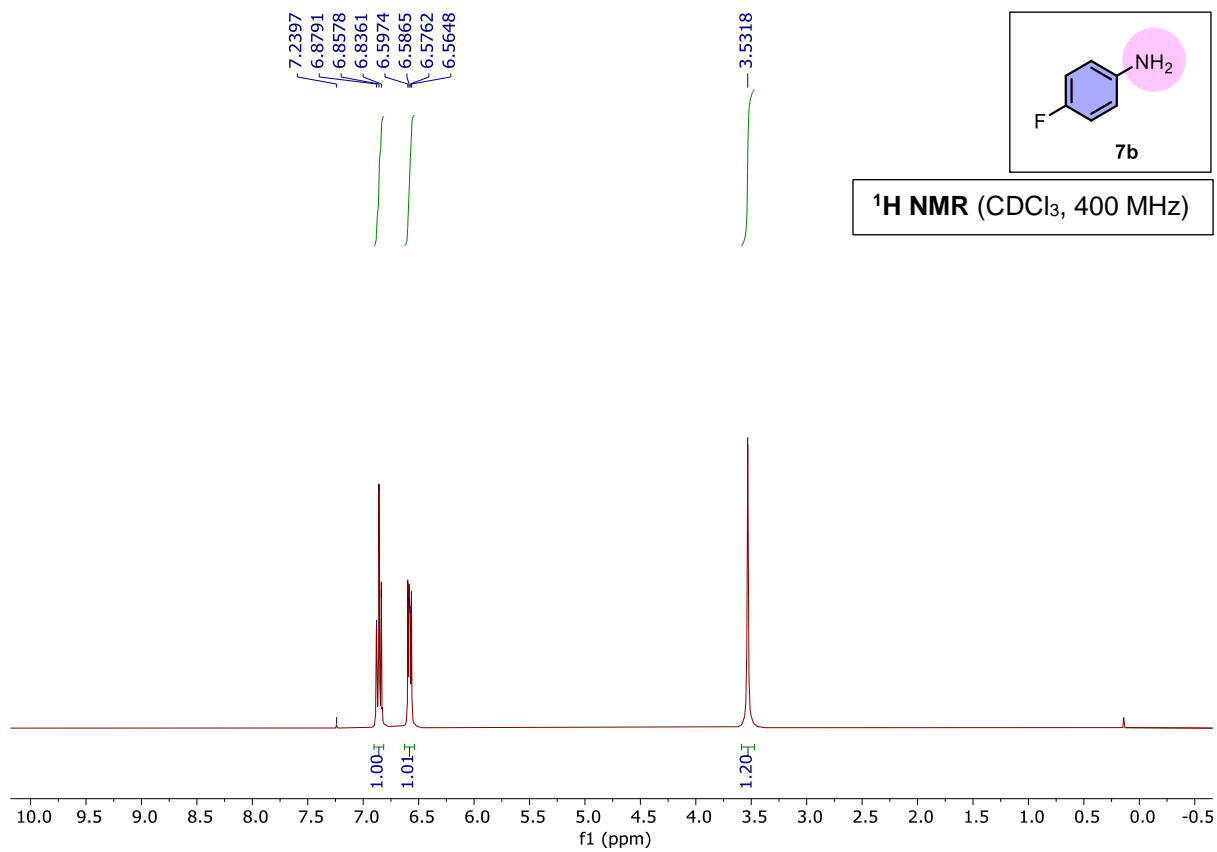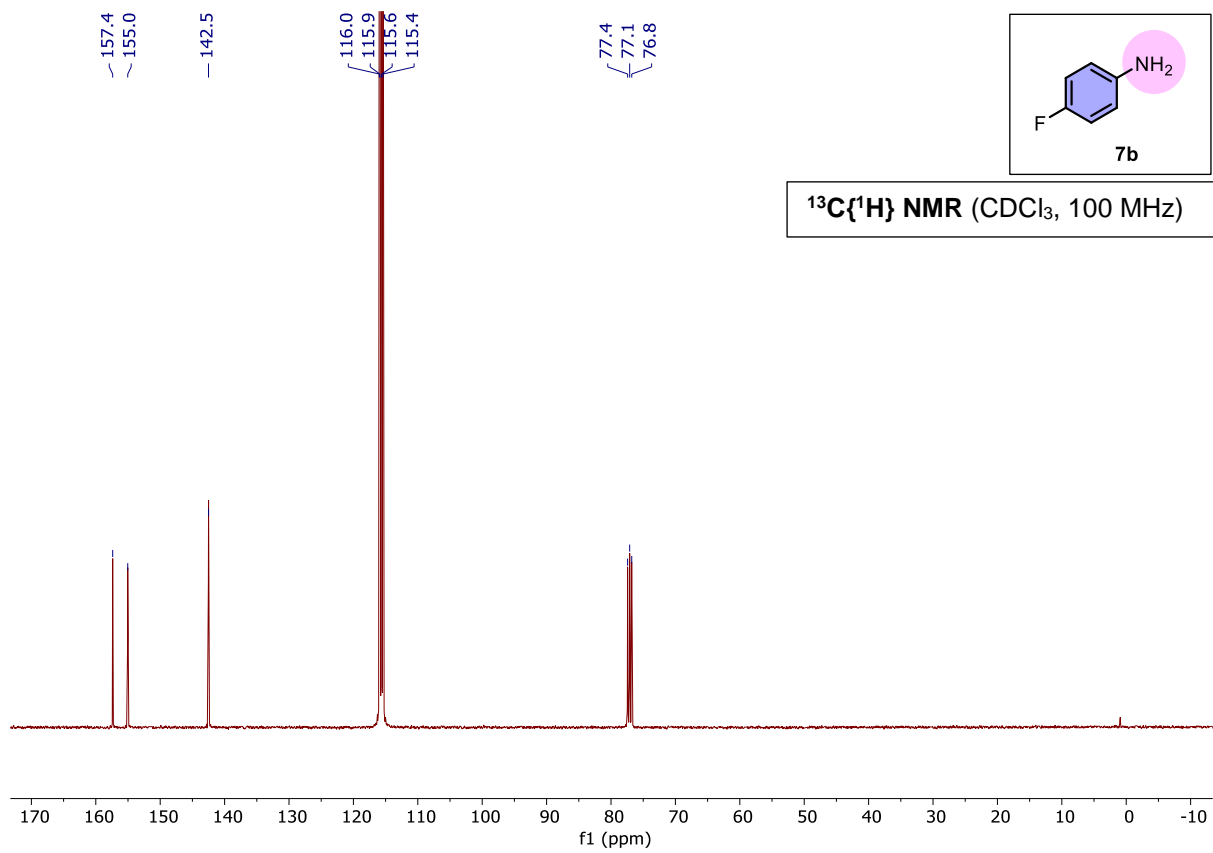

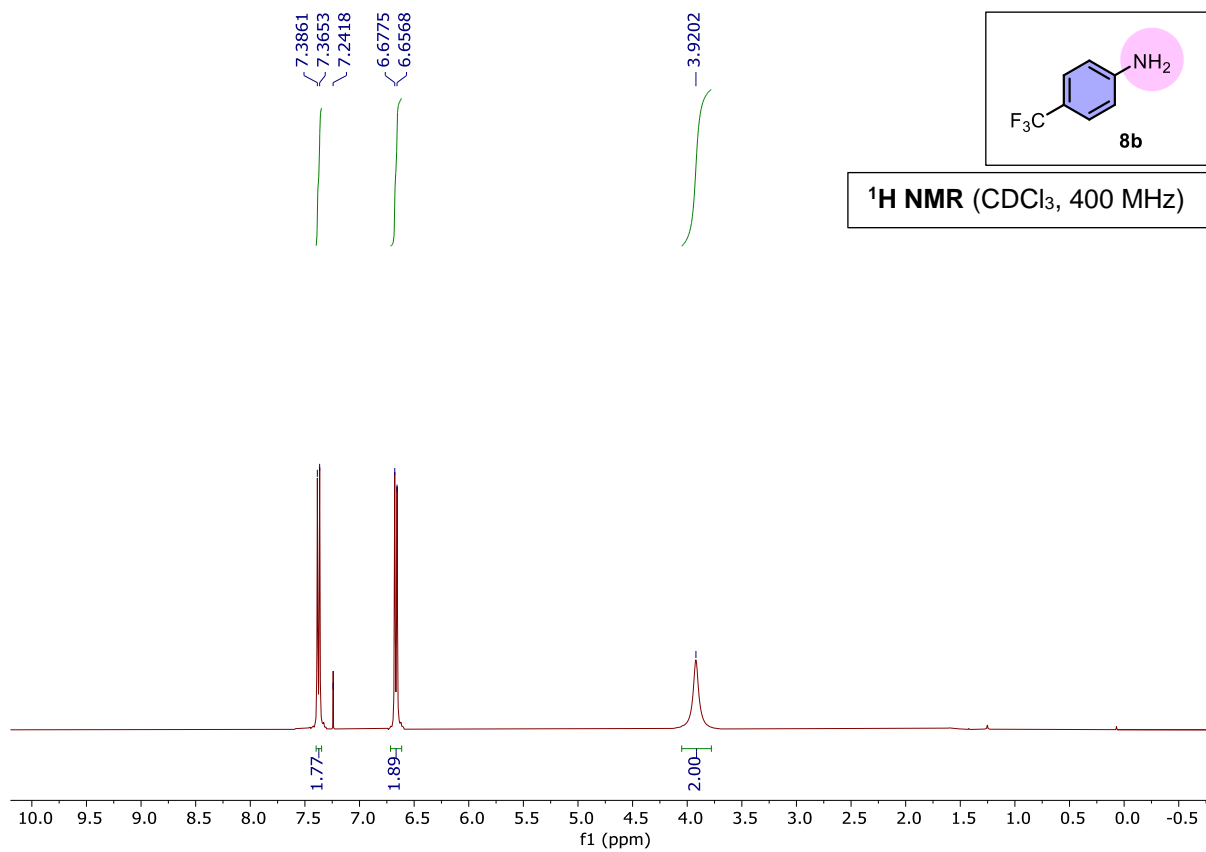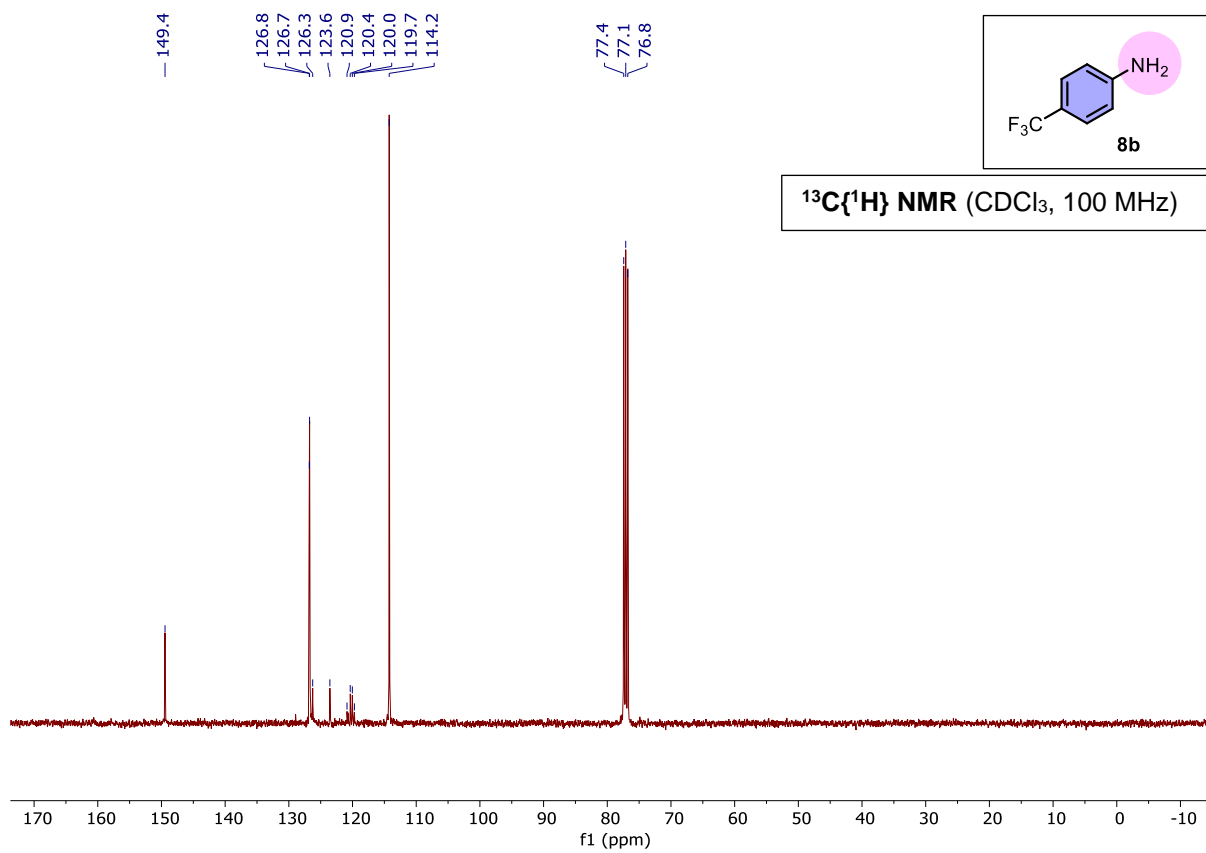

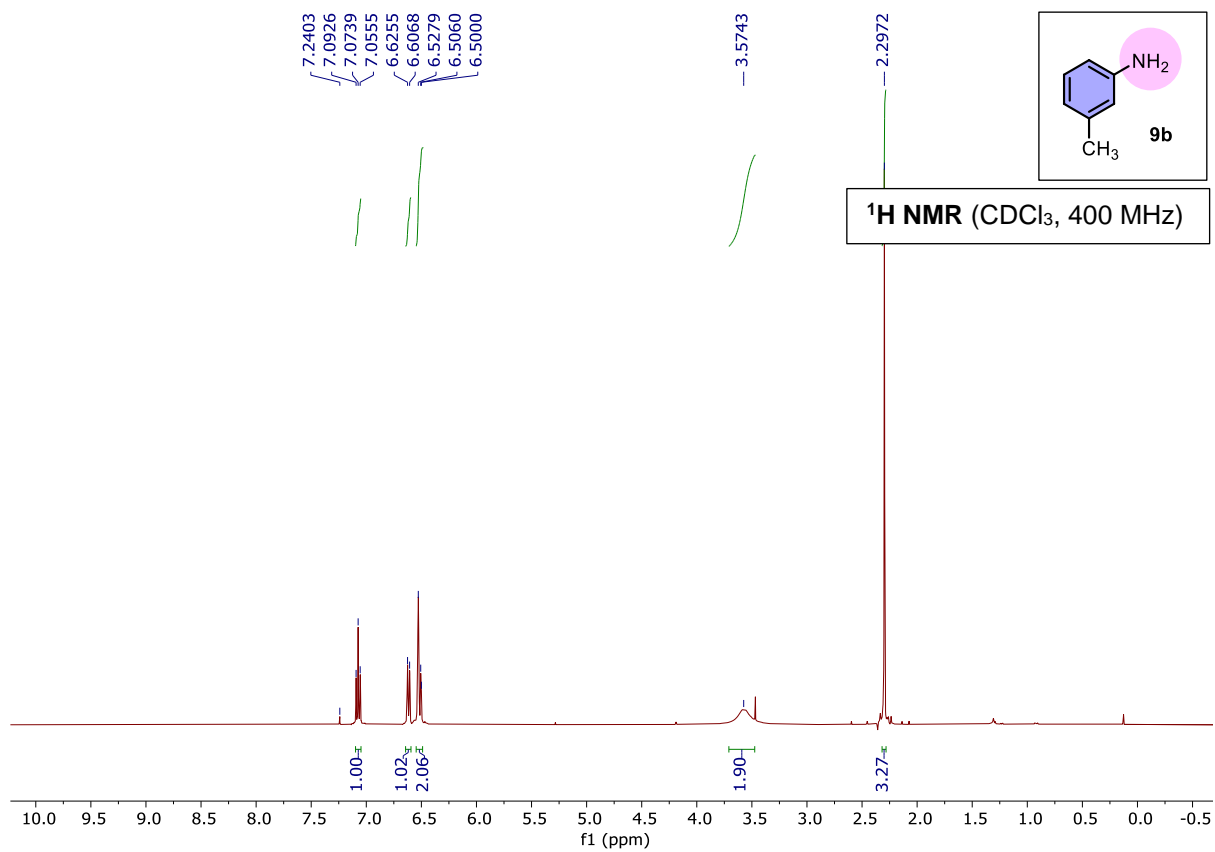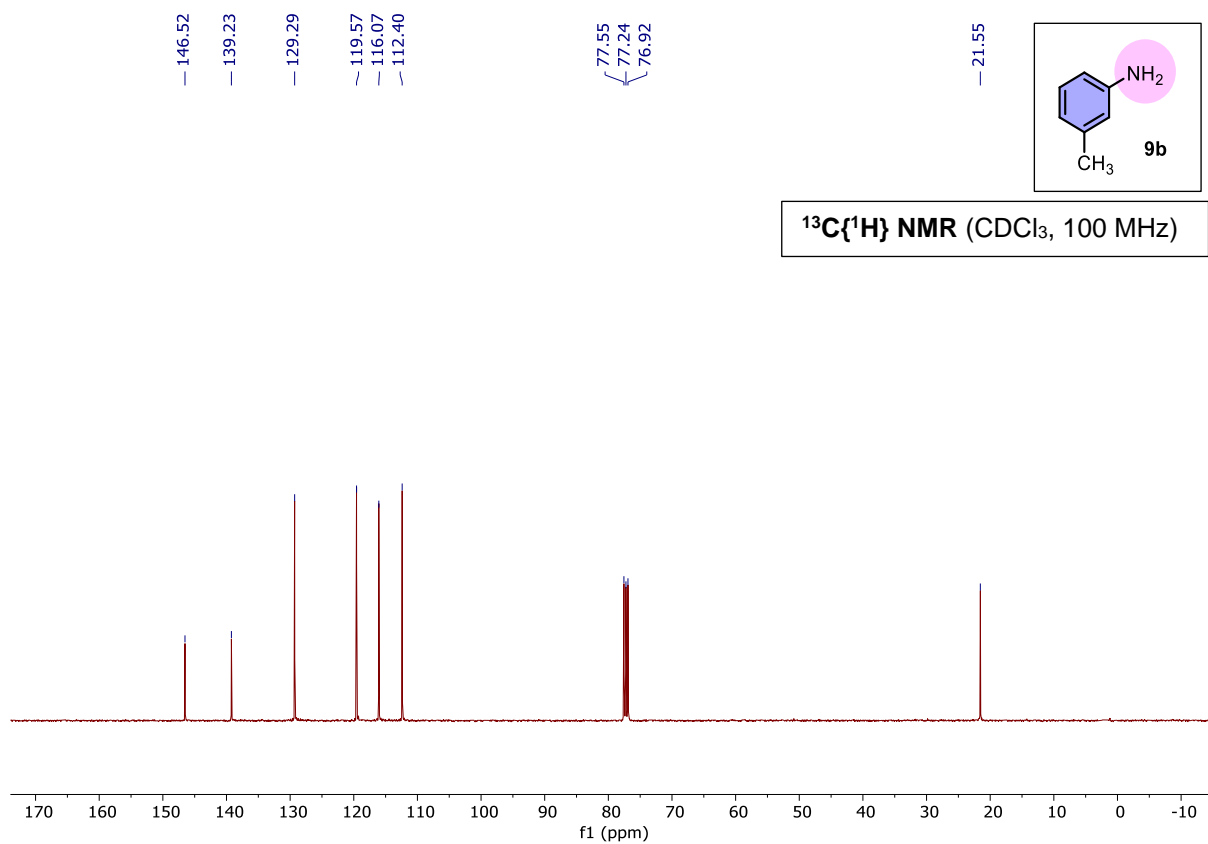

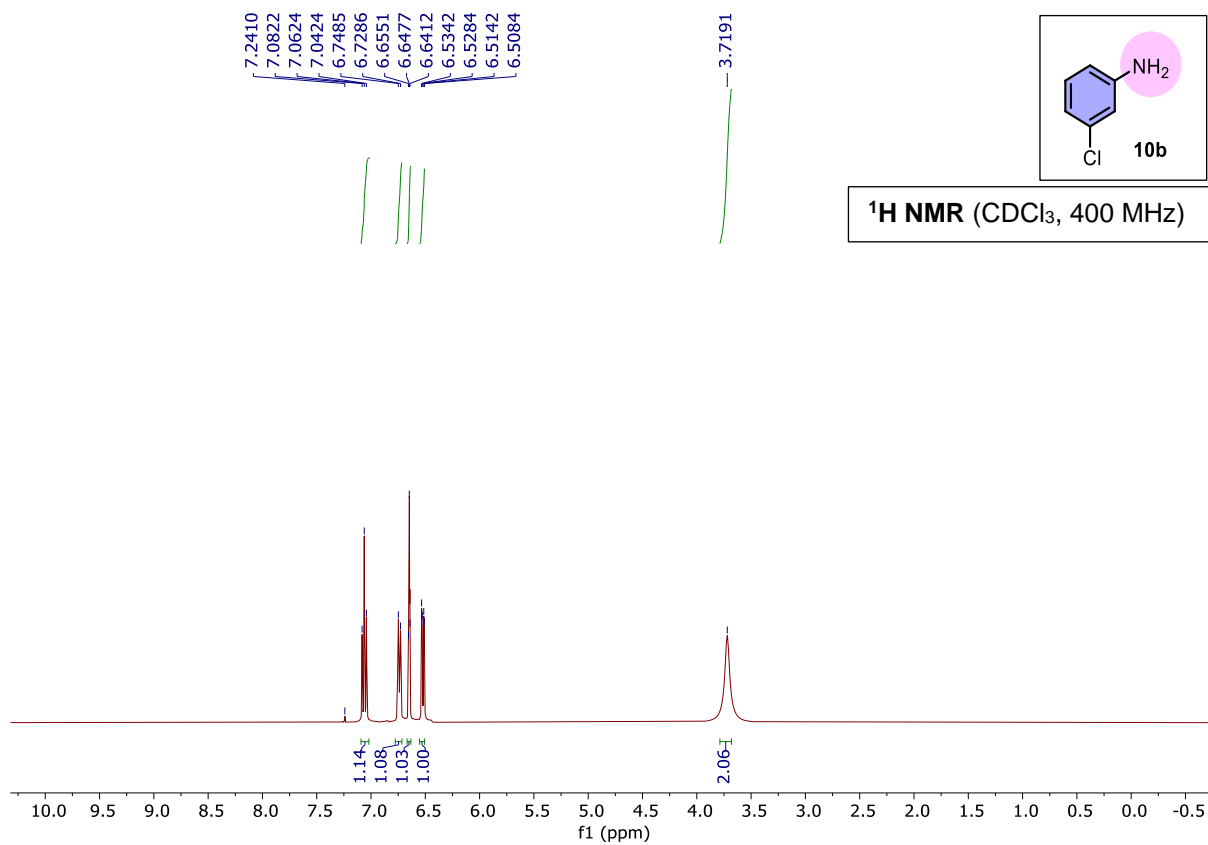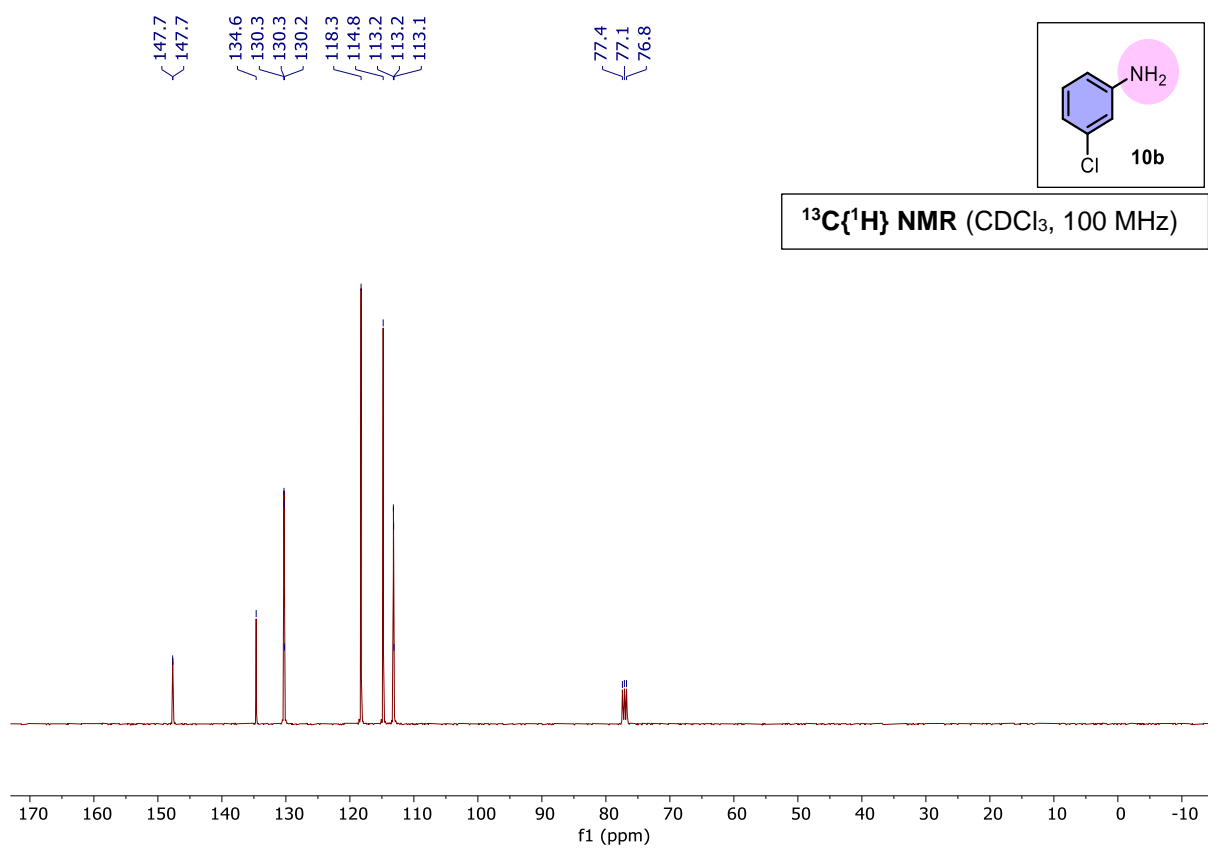



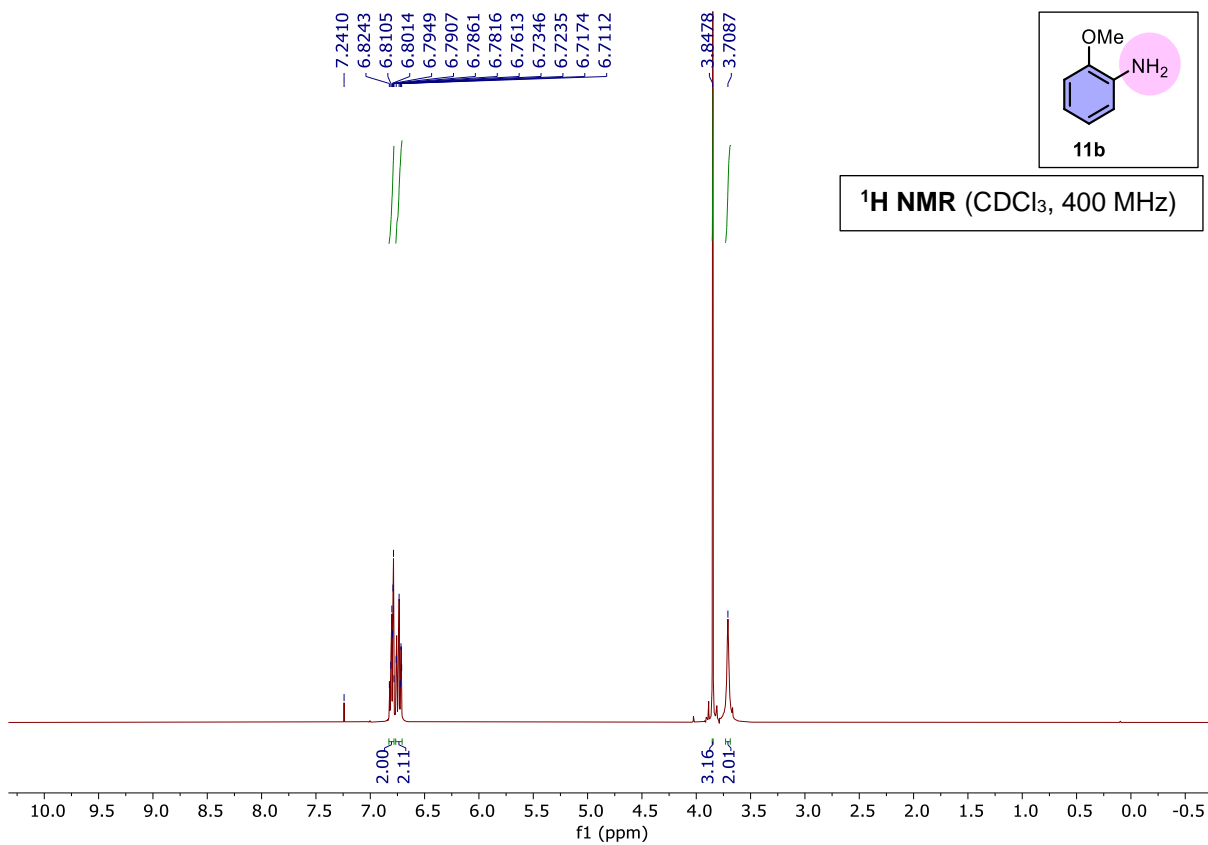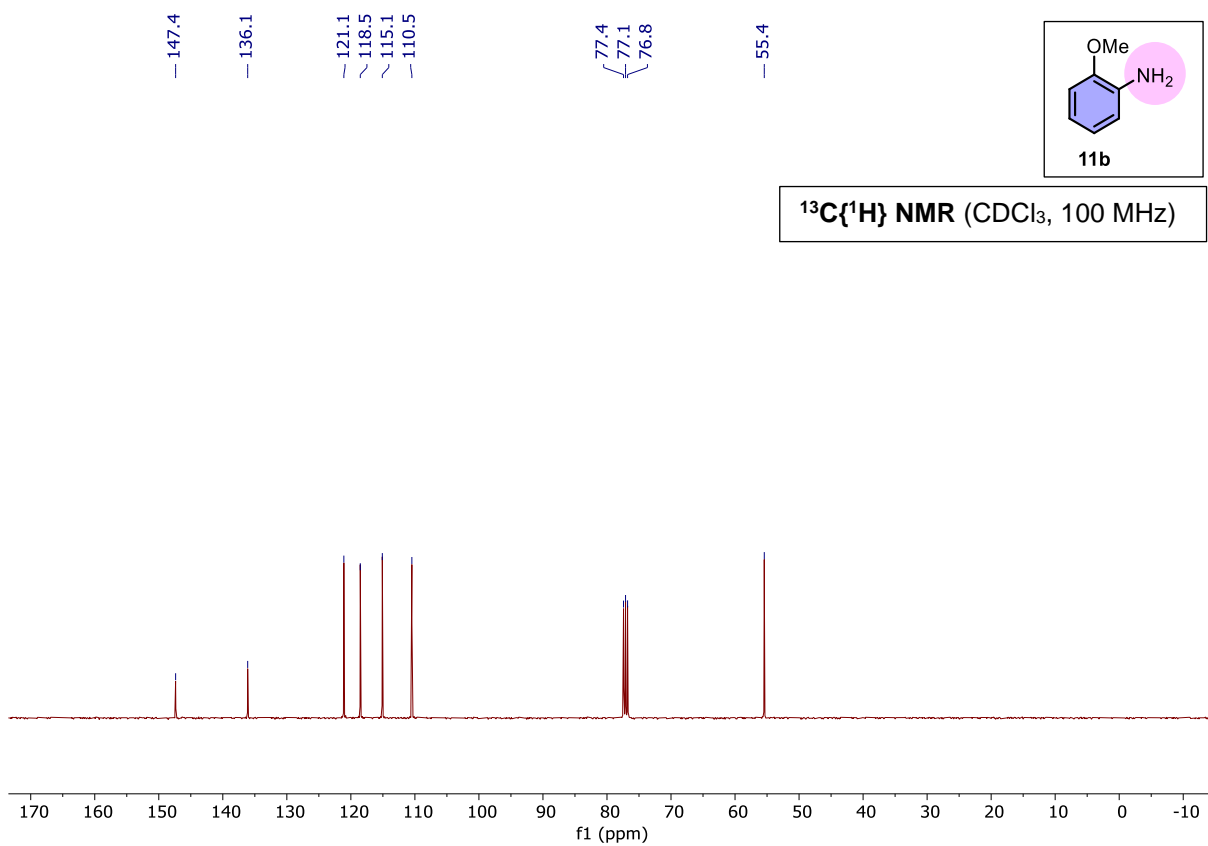

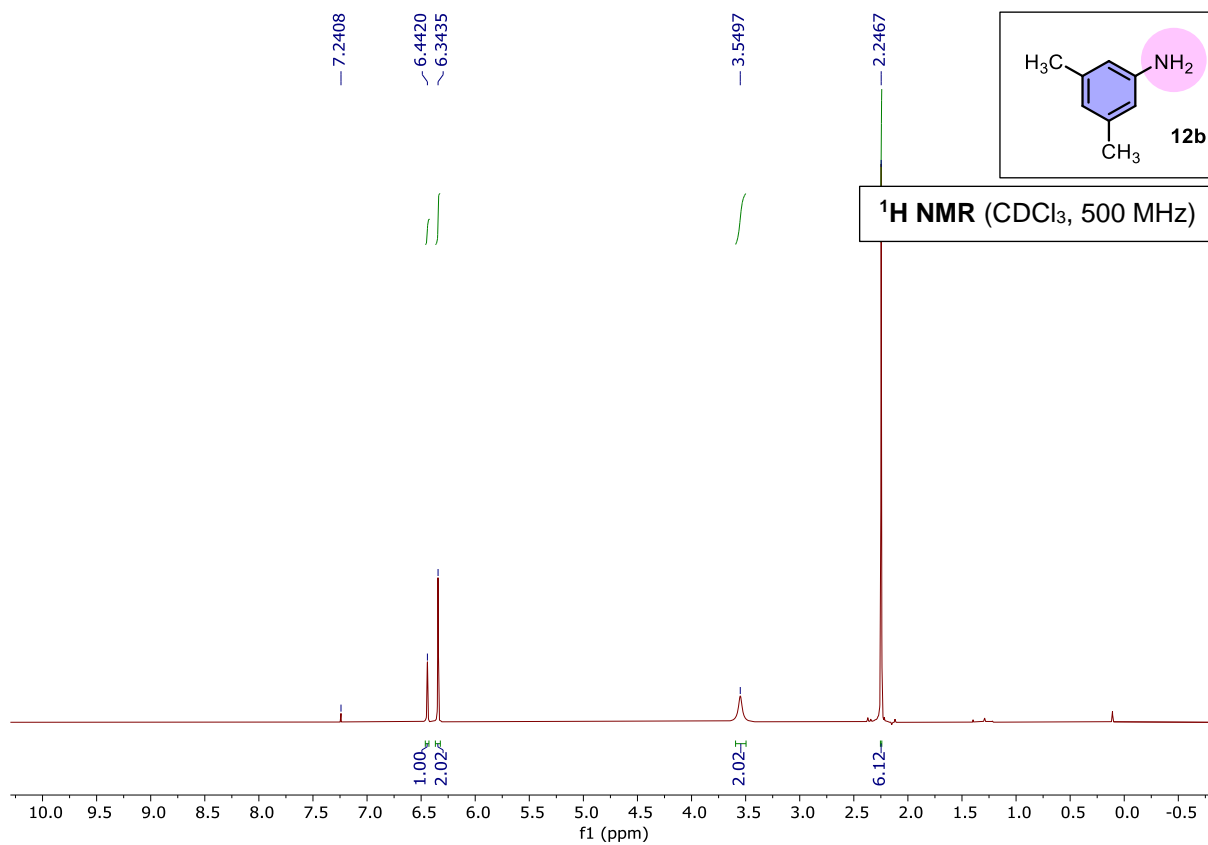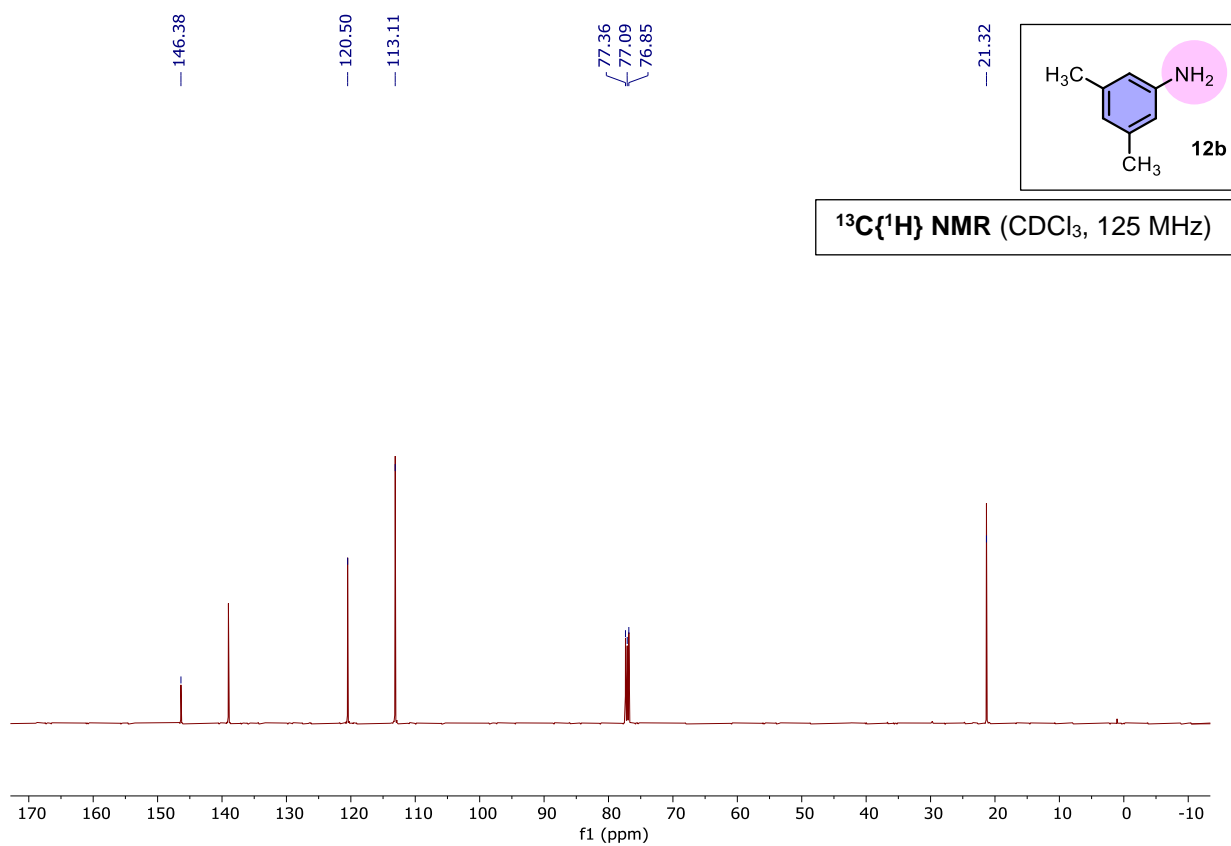

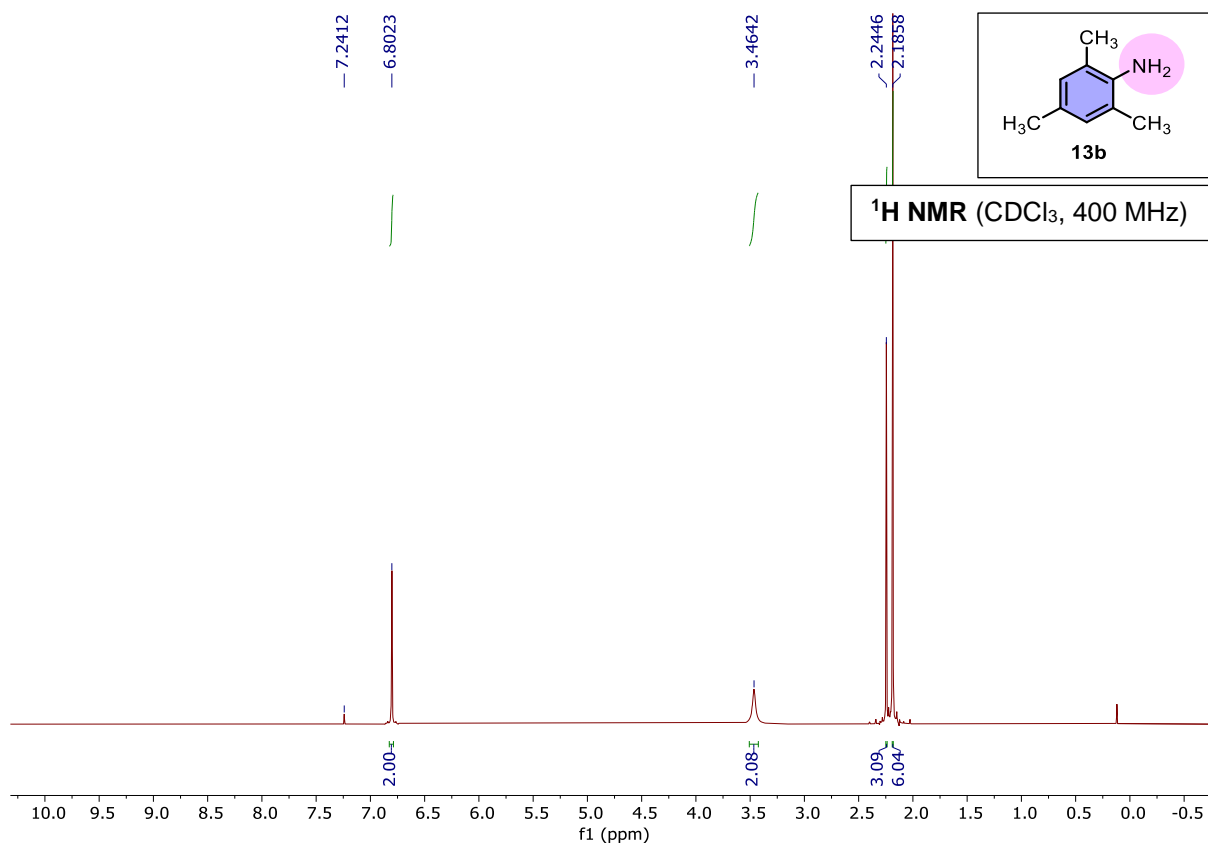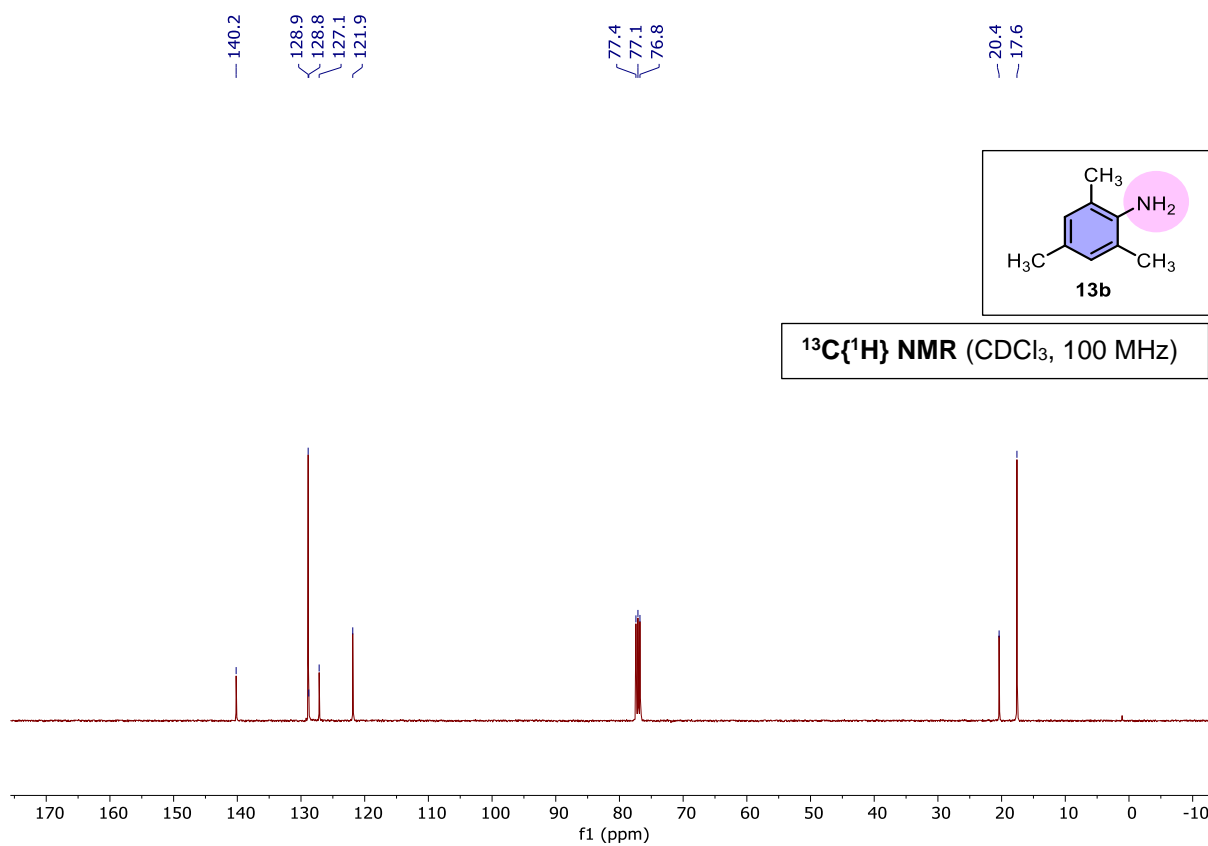

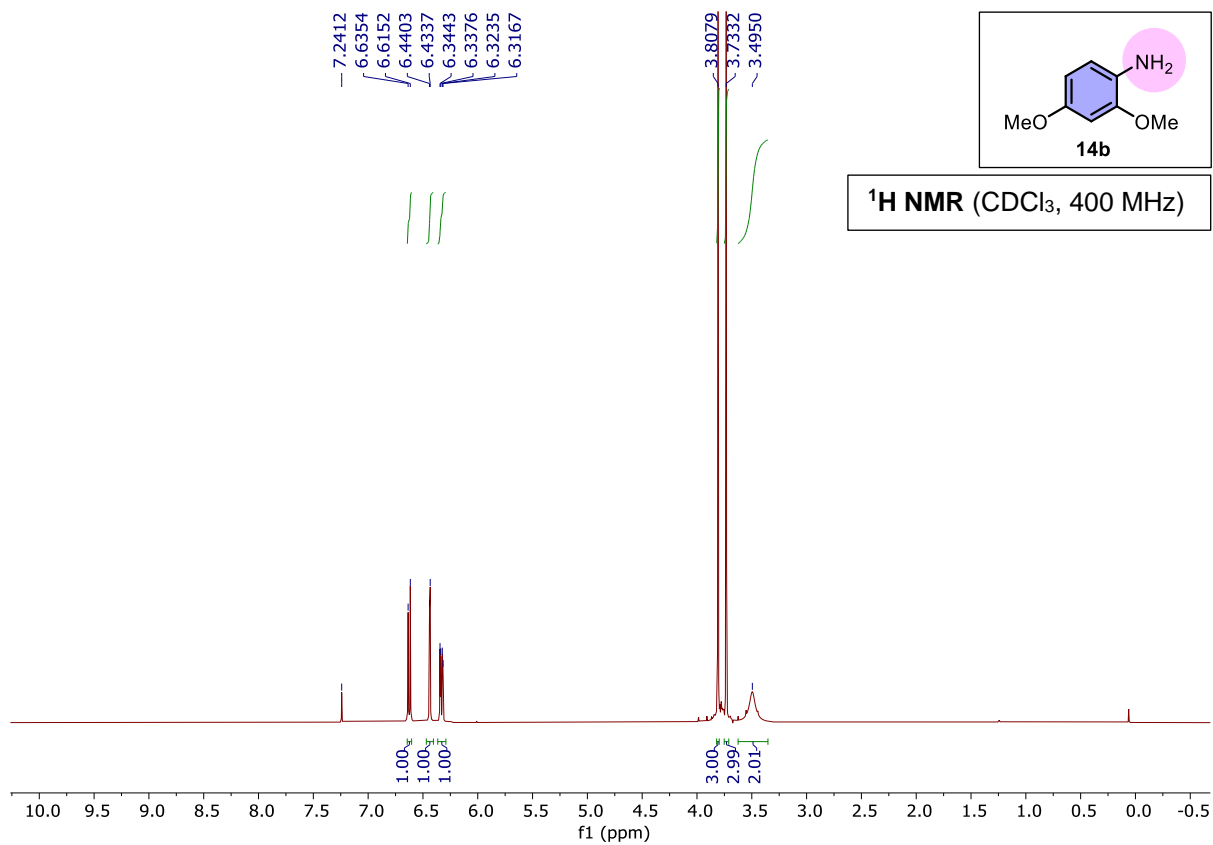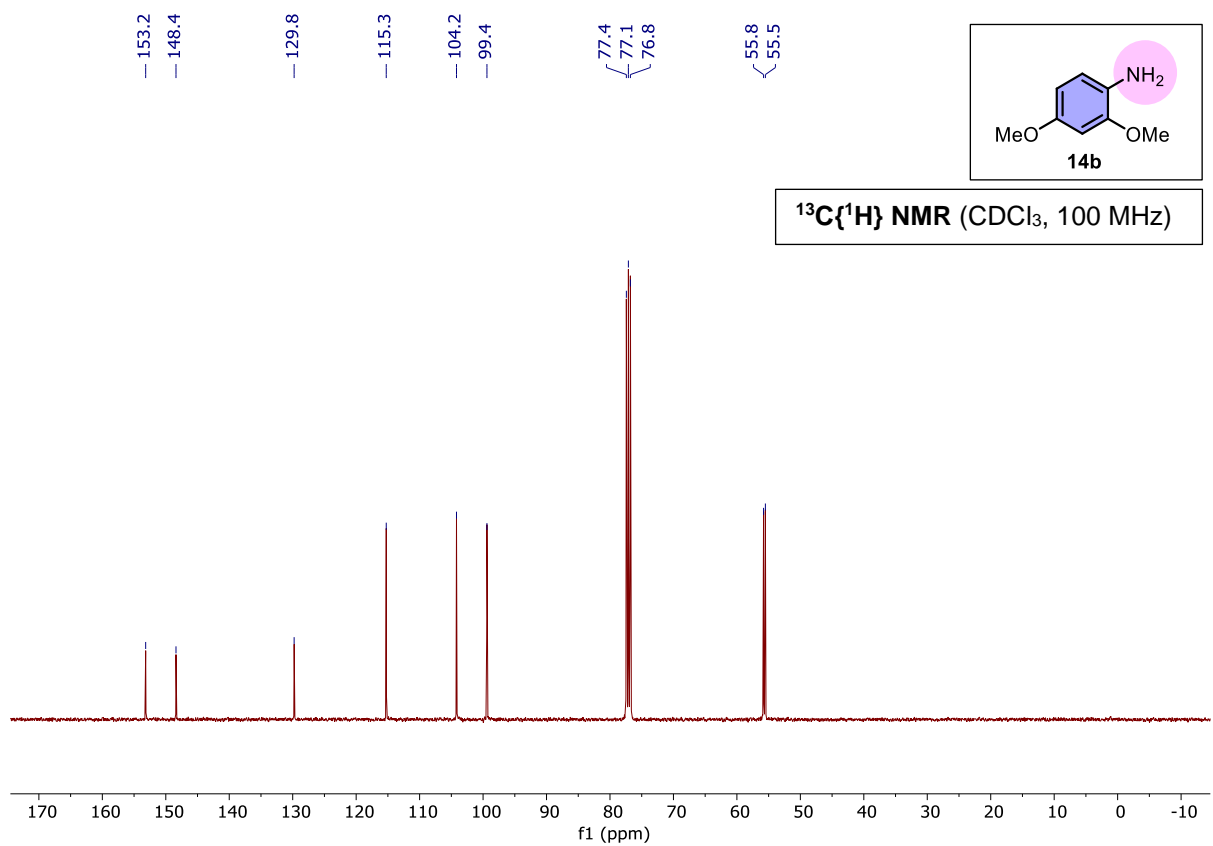

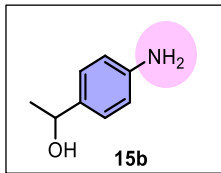

$^1\text{H NMR}$  (DMSO- $d_6$ , 400 MHz)

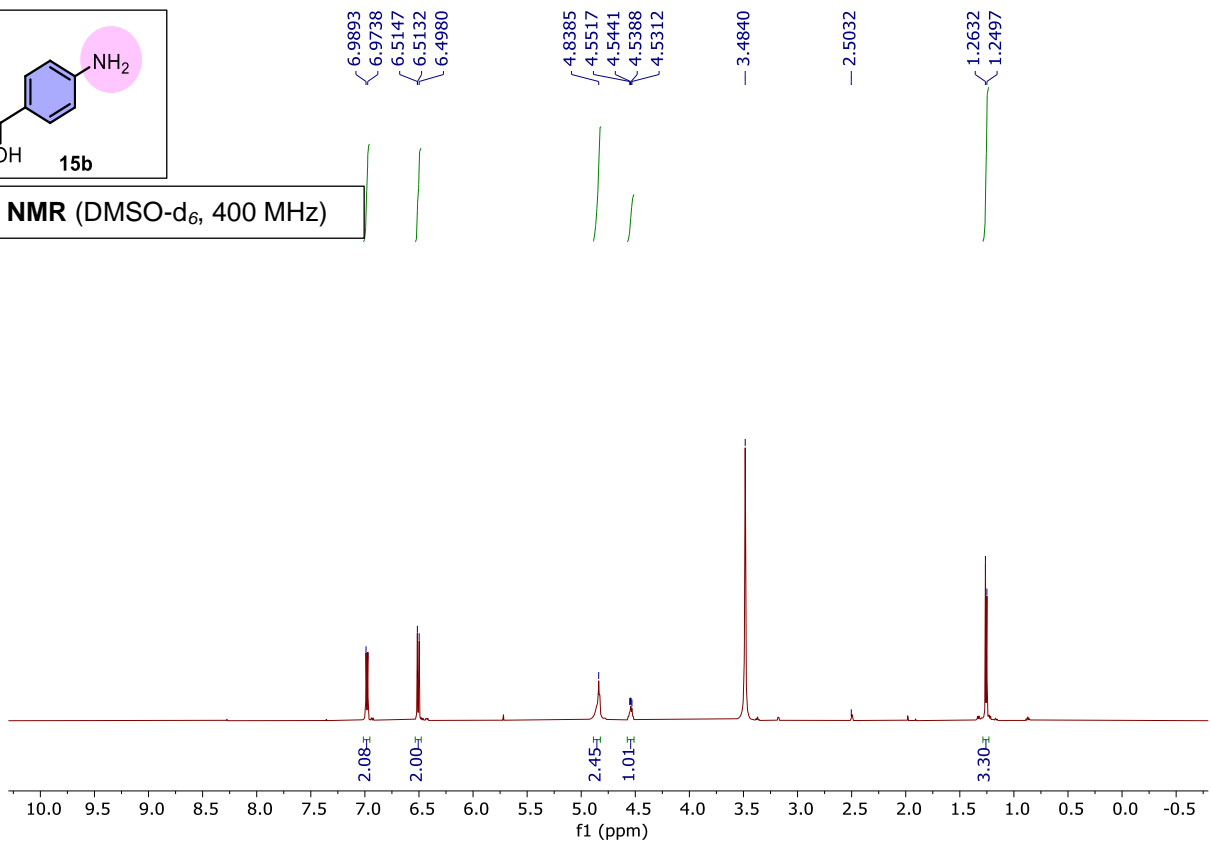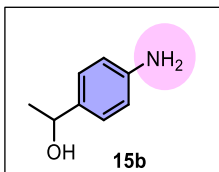

$^{13}\text{C}\{^1\text{H}\}$  NMR (DMSO- $d_6$ , 100 MHz)

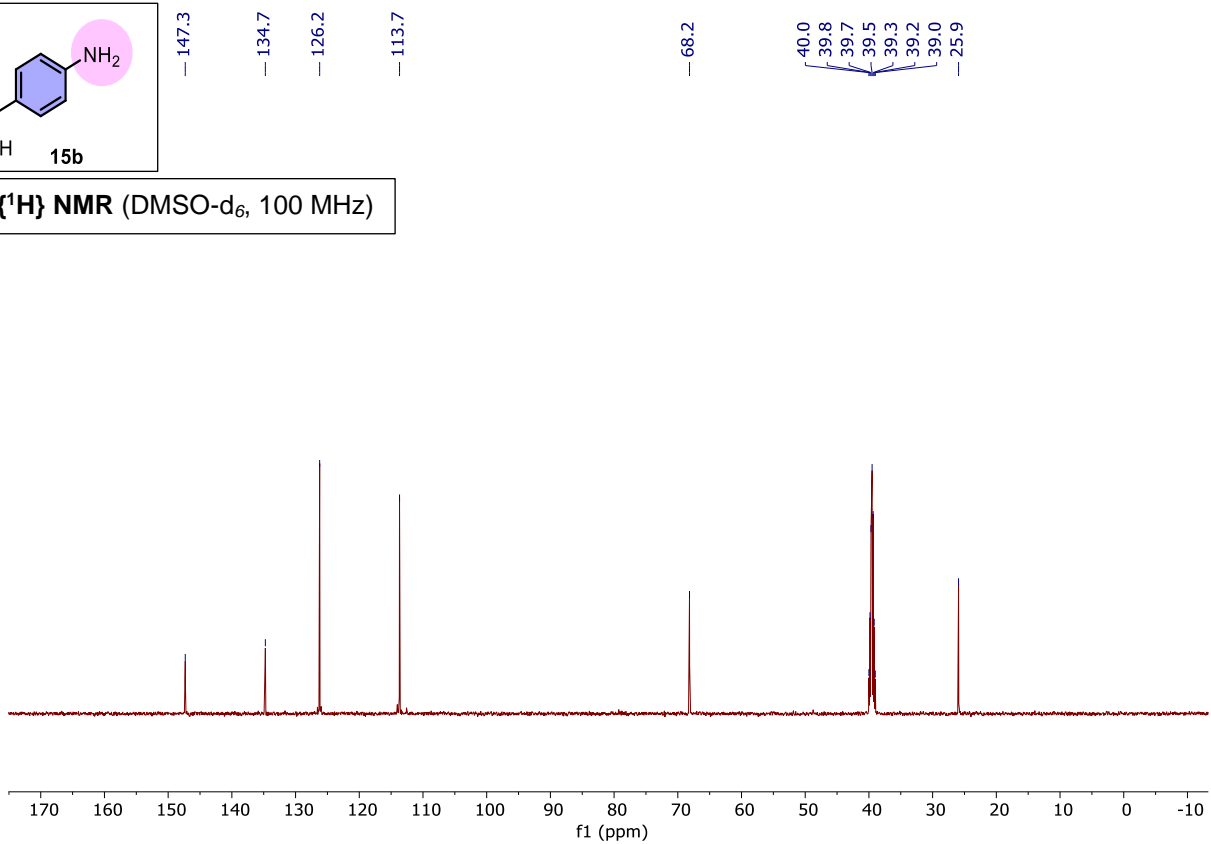

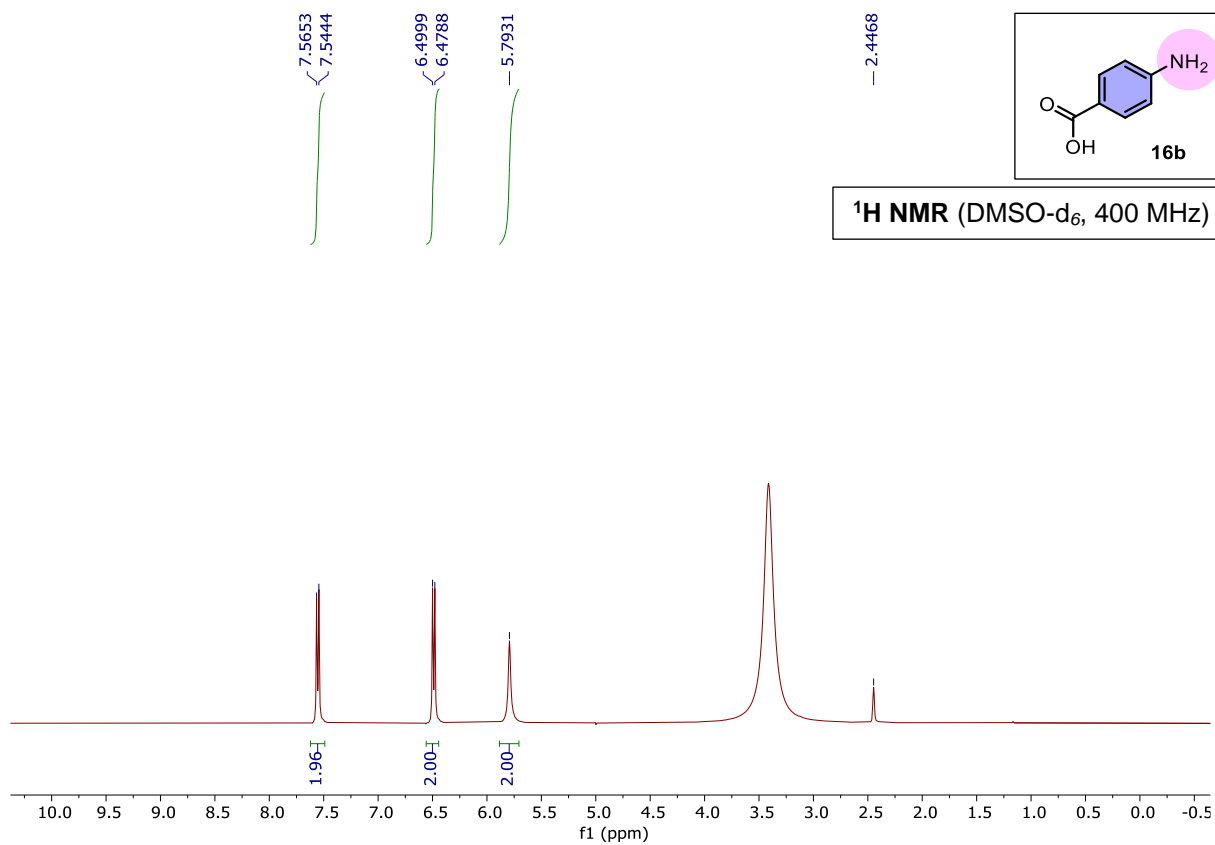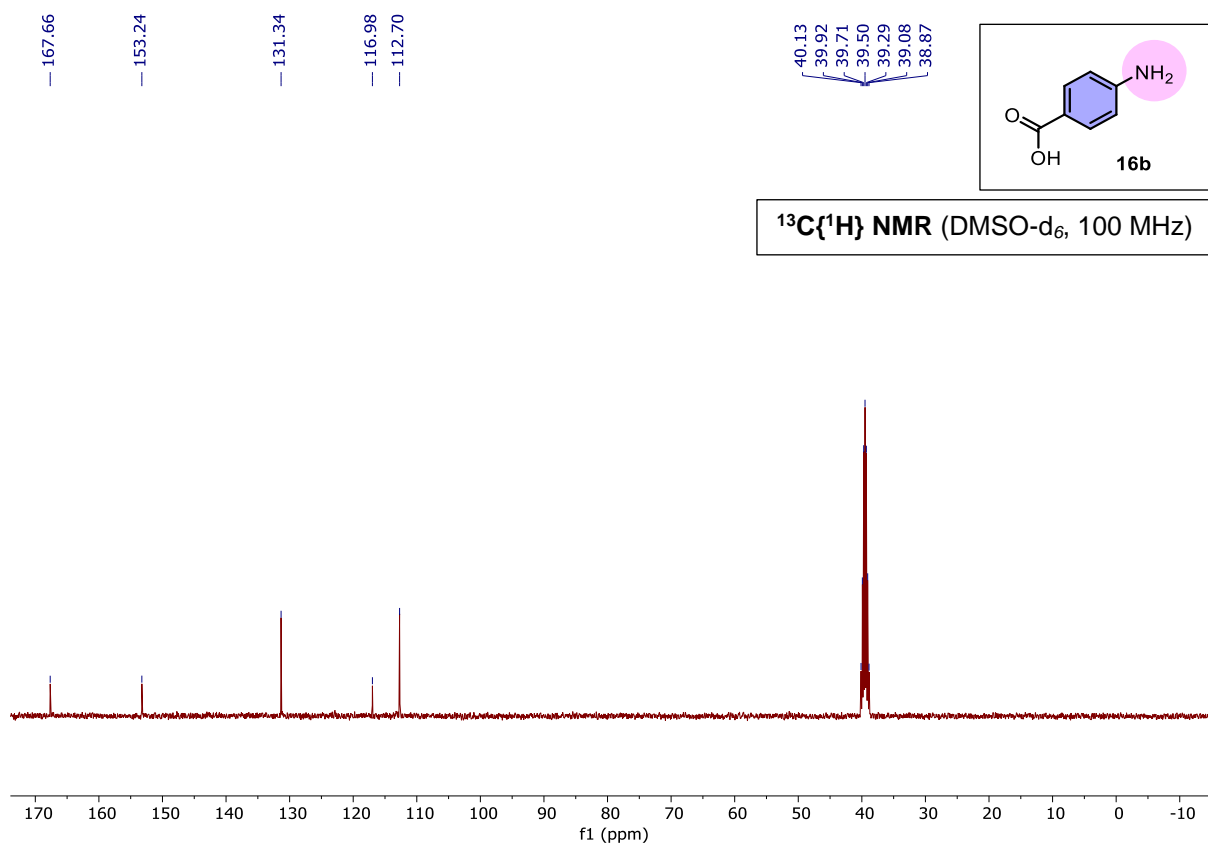

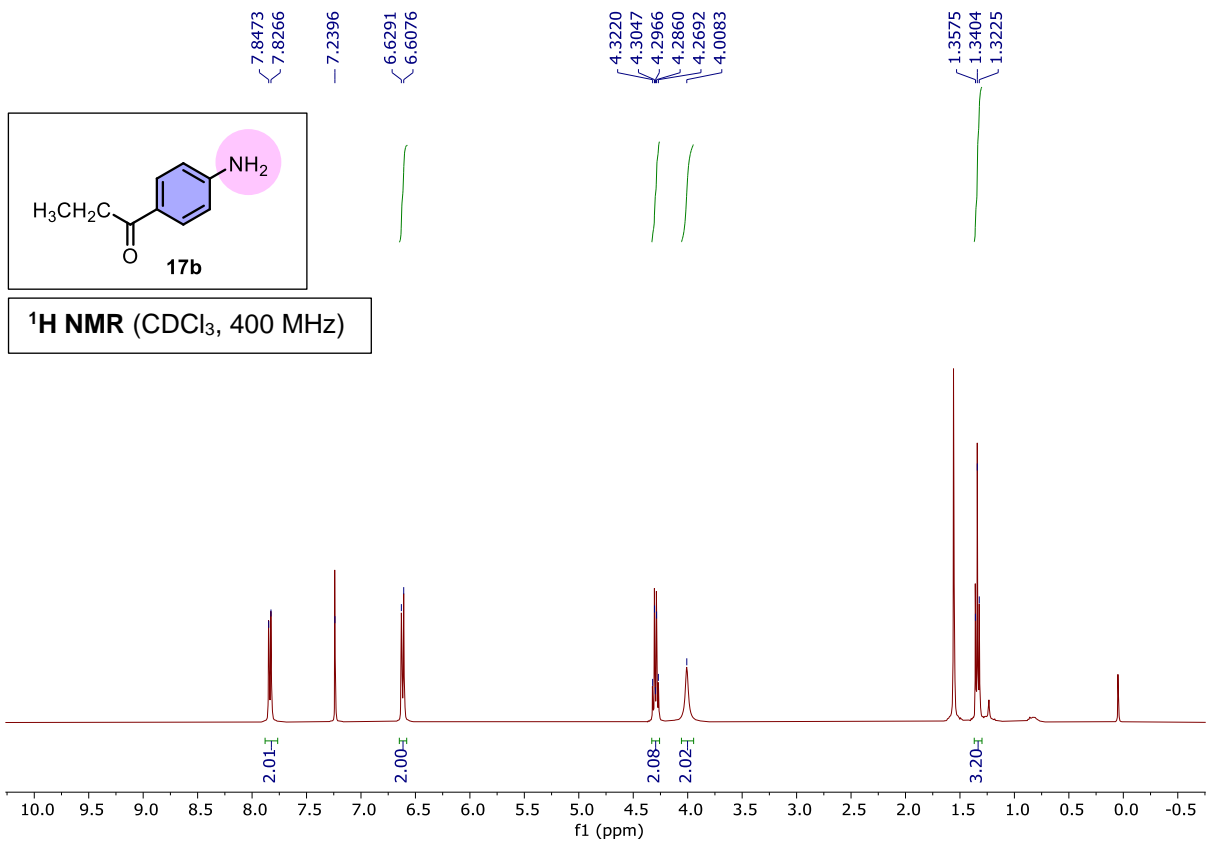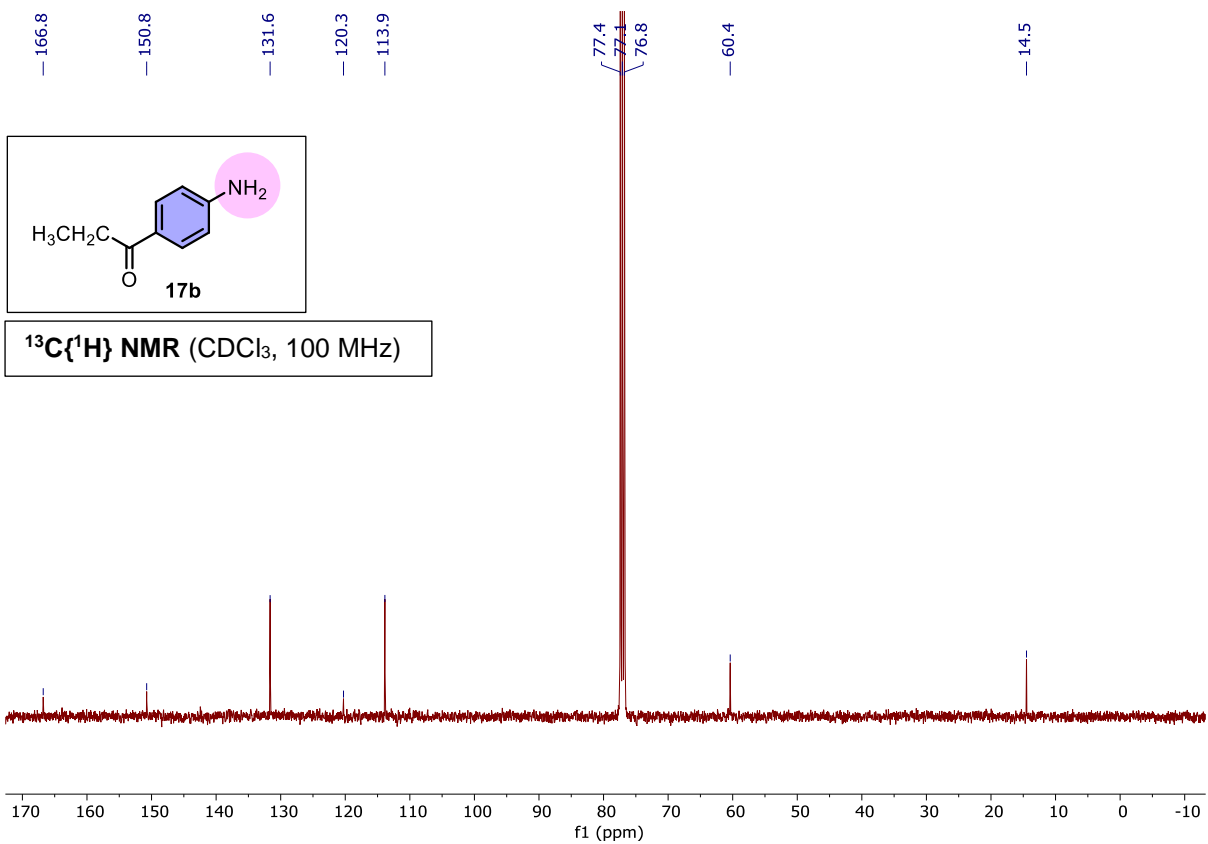

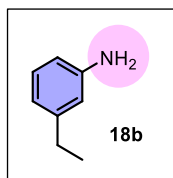

**$^1\text{H}$  NMR (CDCl<sub>3</sub>, 400 MHz)**

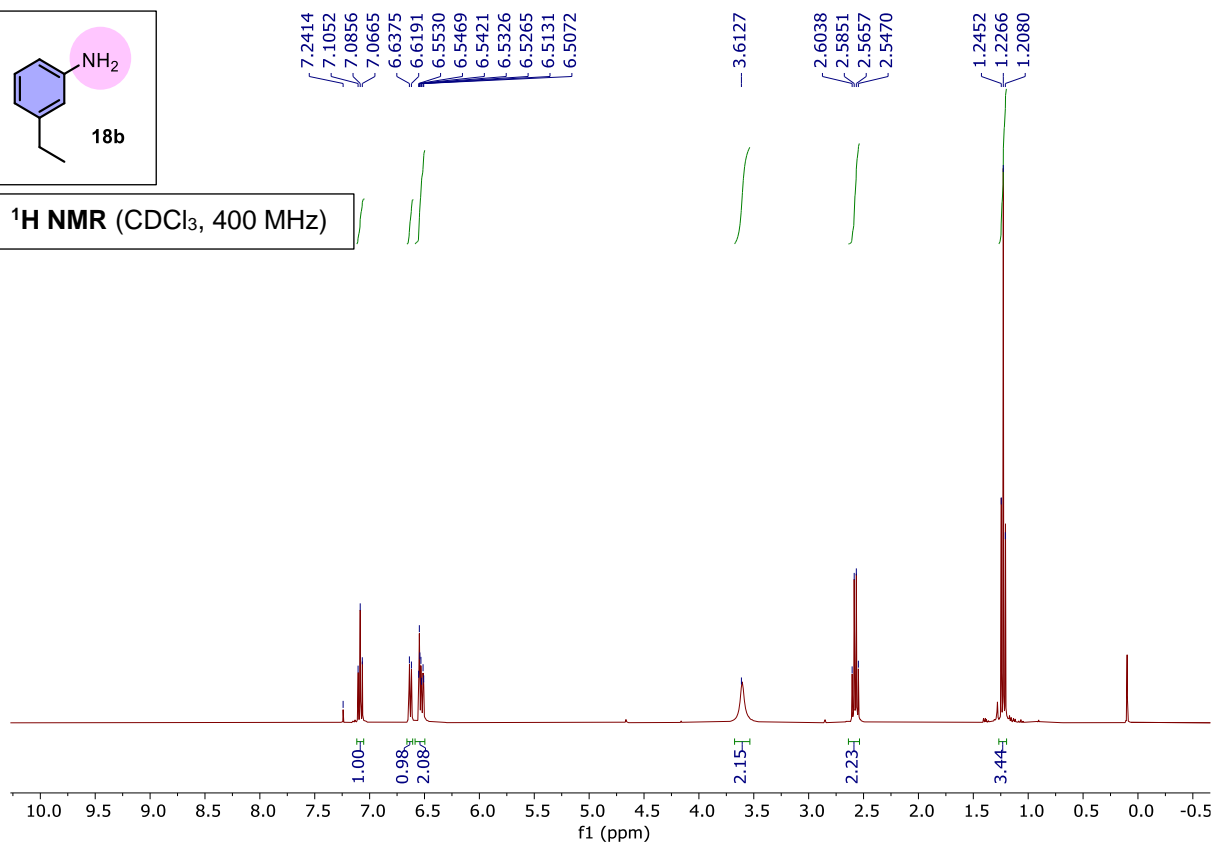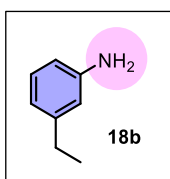

**$^{13}\text{C}\{^1\text{H}\}$  NMR (CDCl<sub>3</sub>, 100 MHz)**

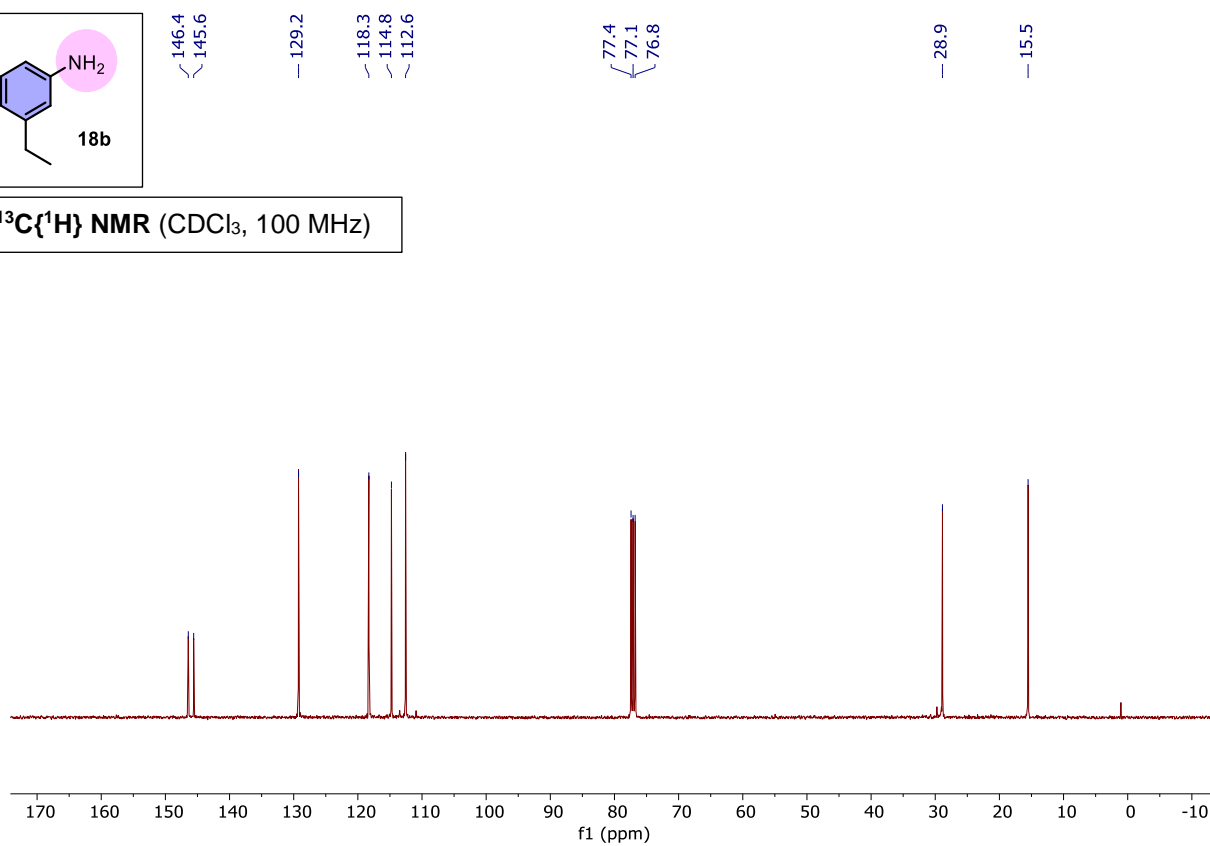



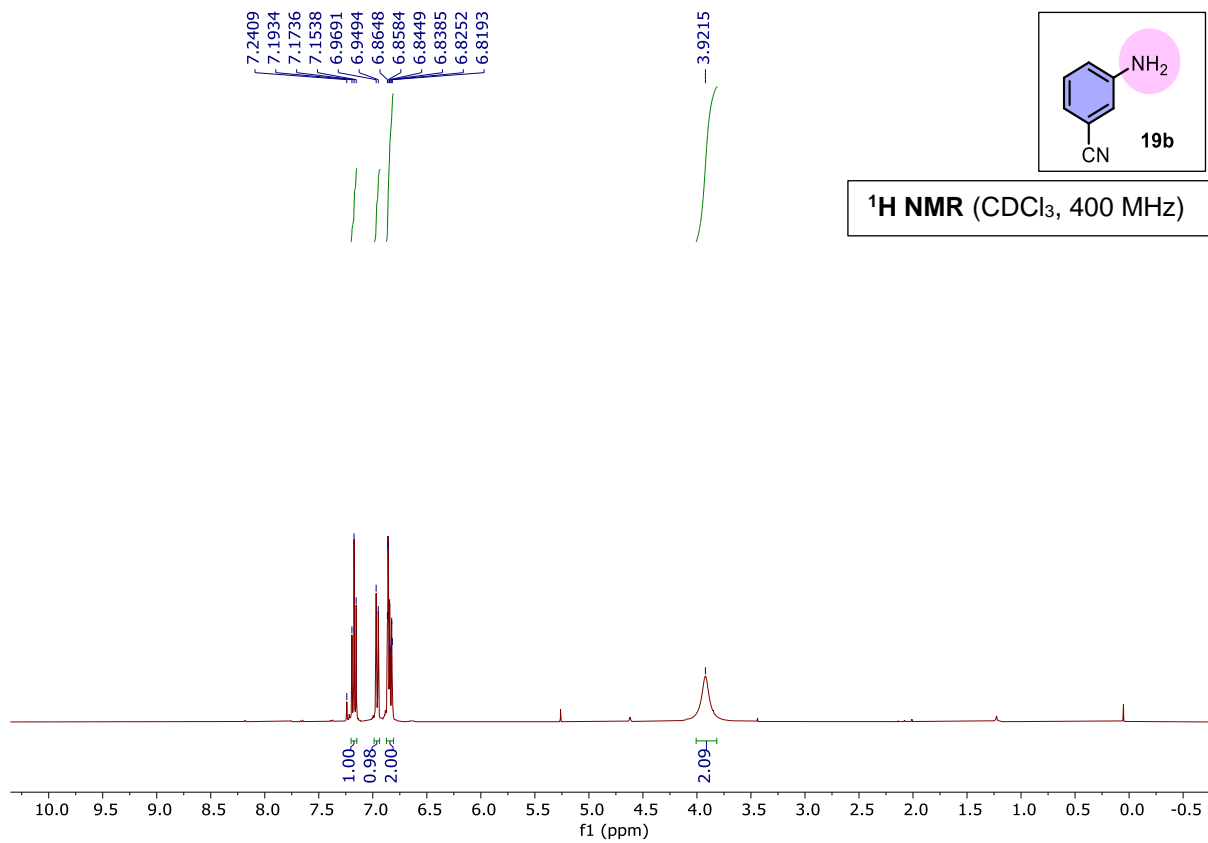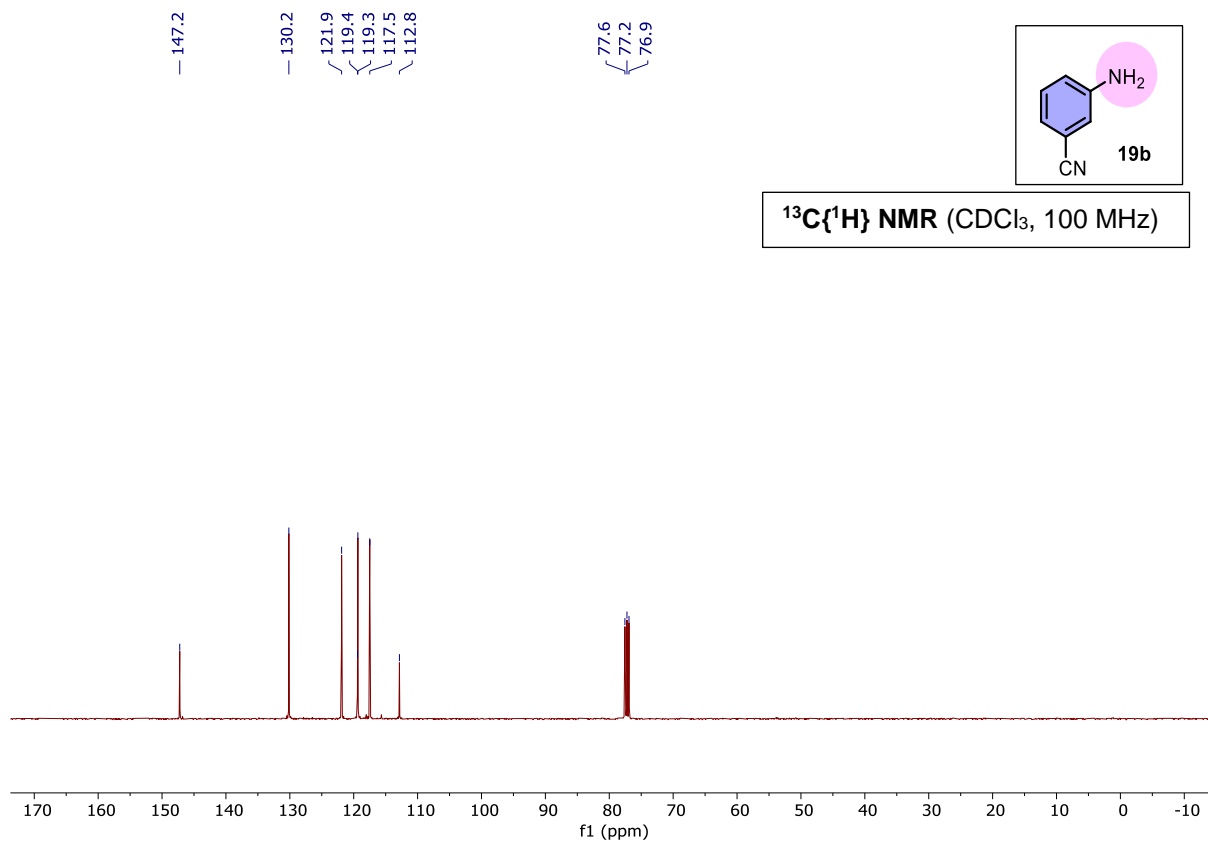

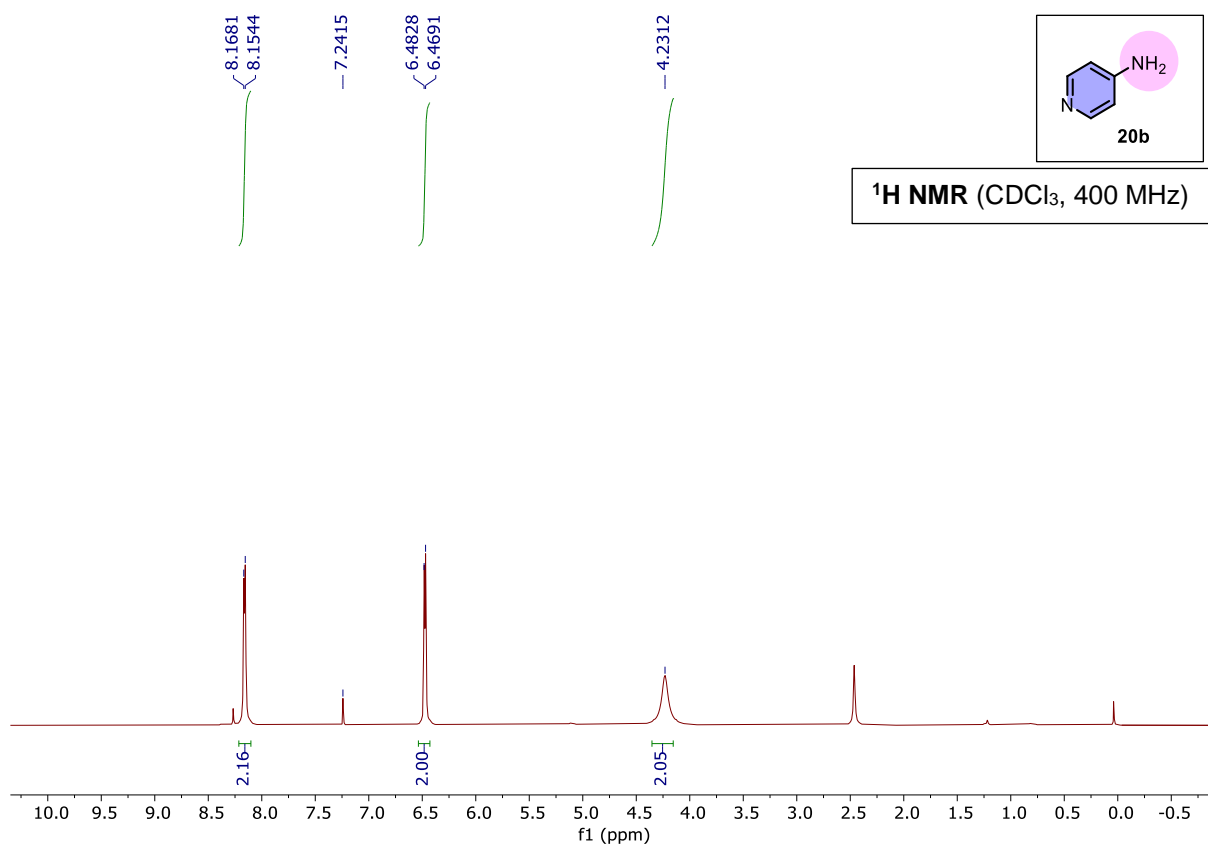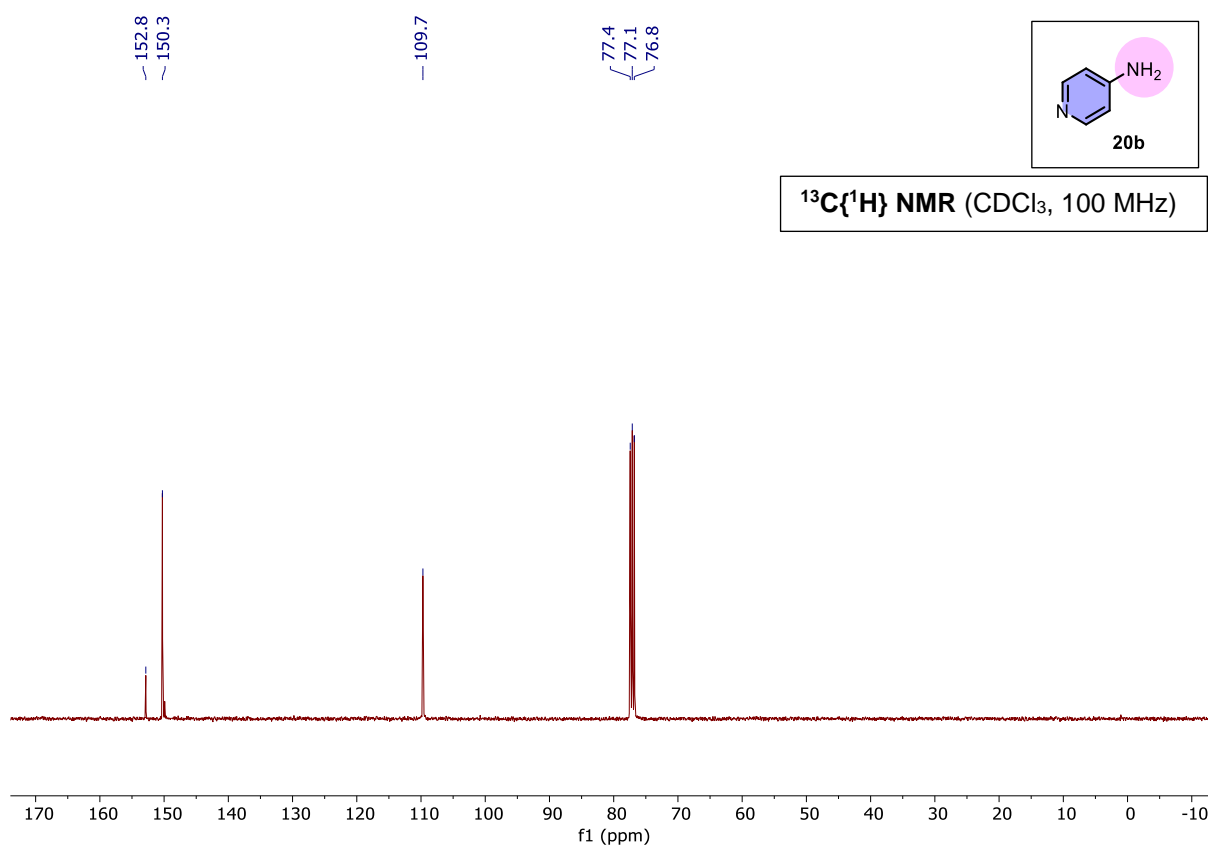

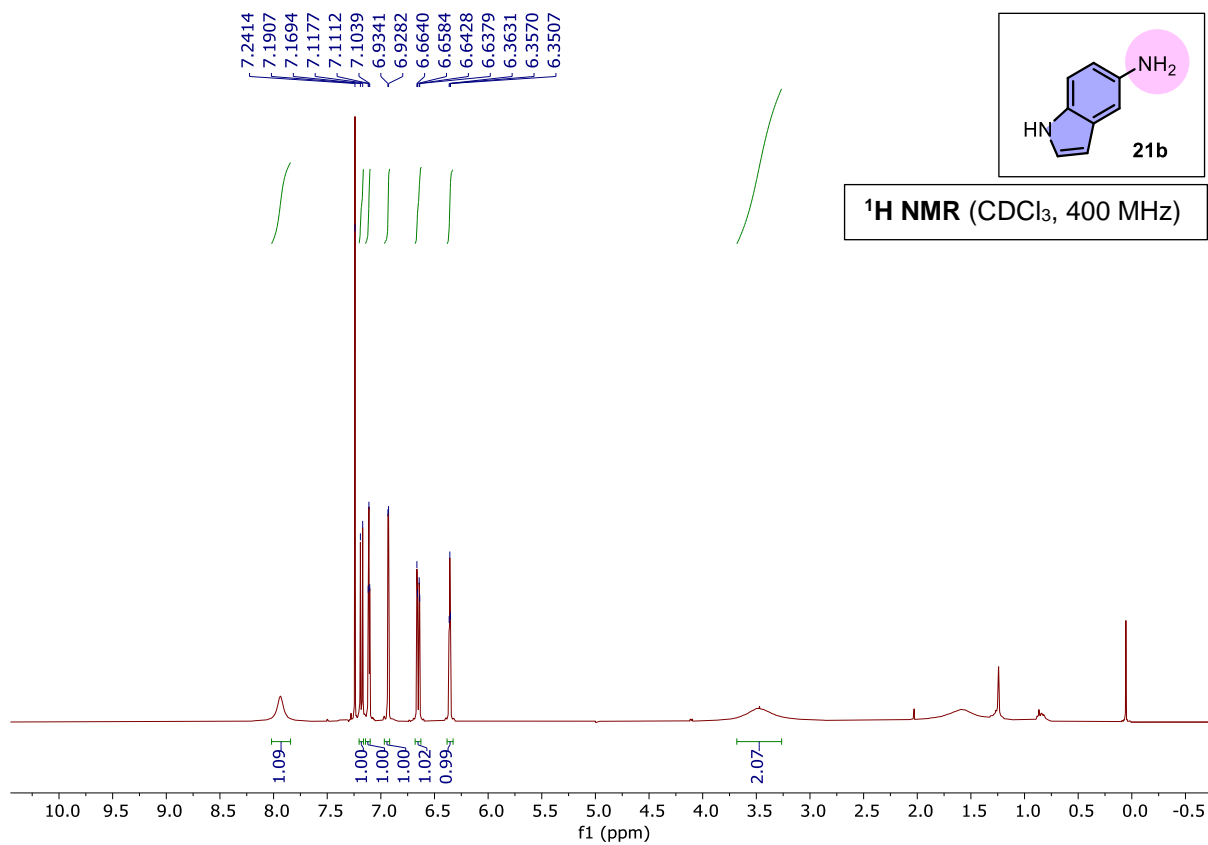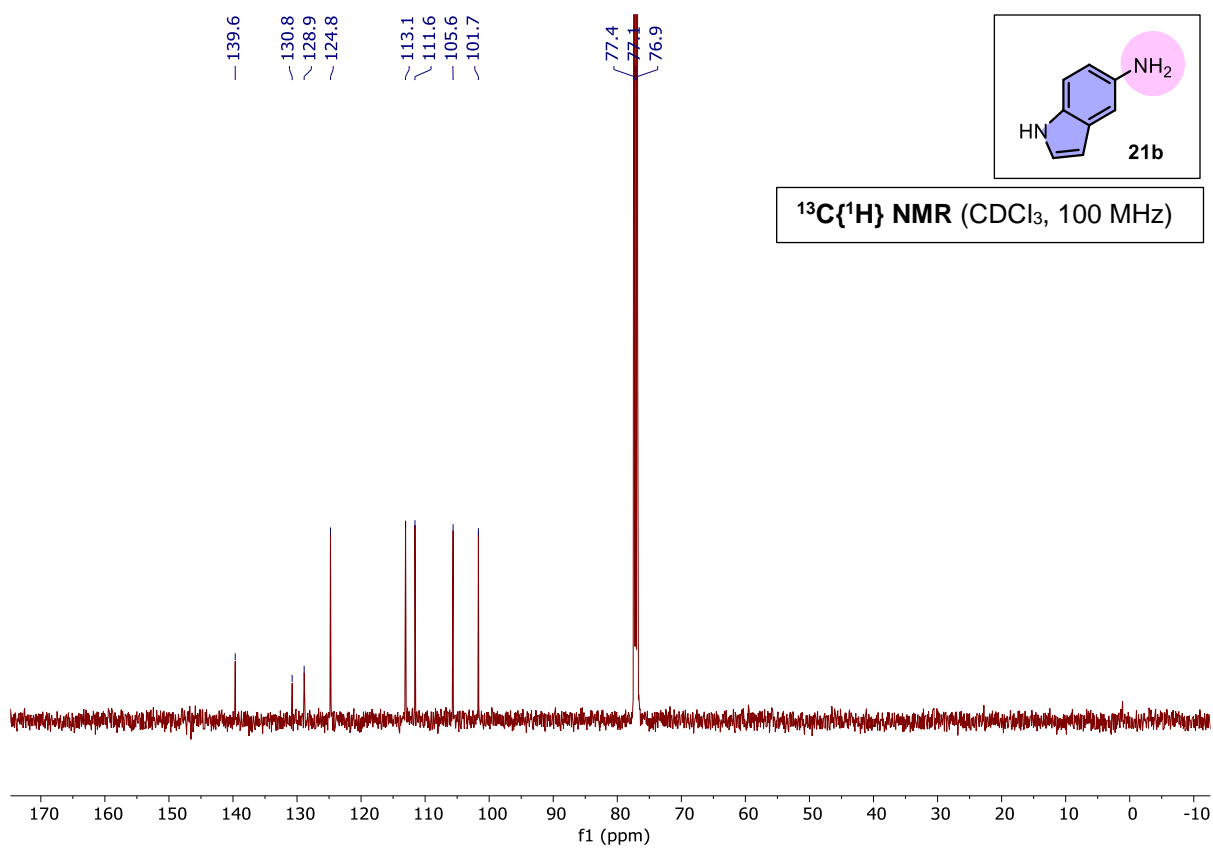

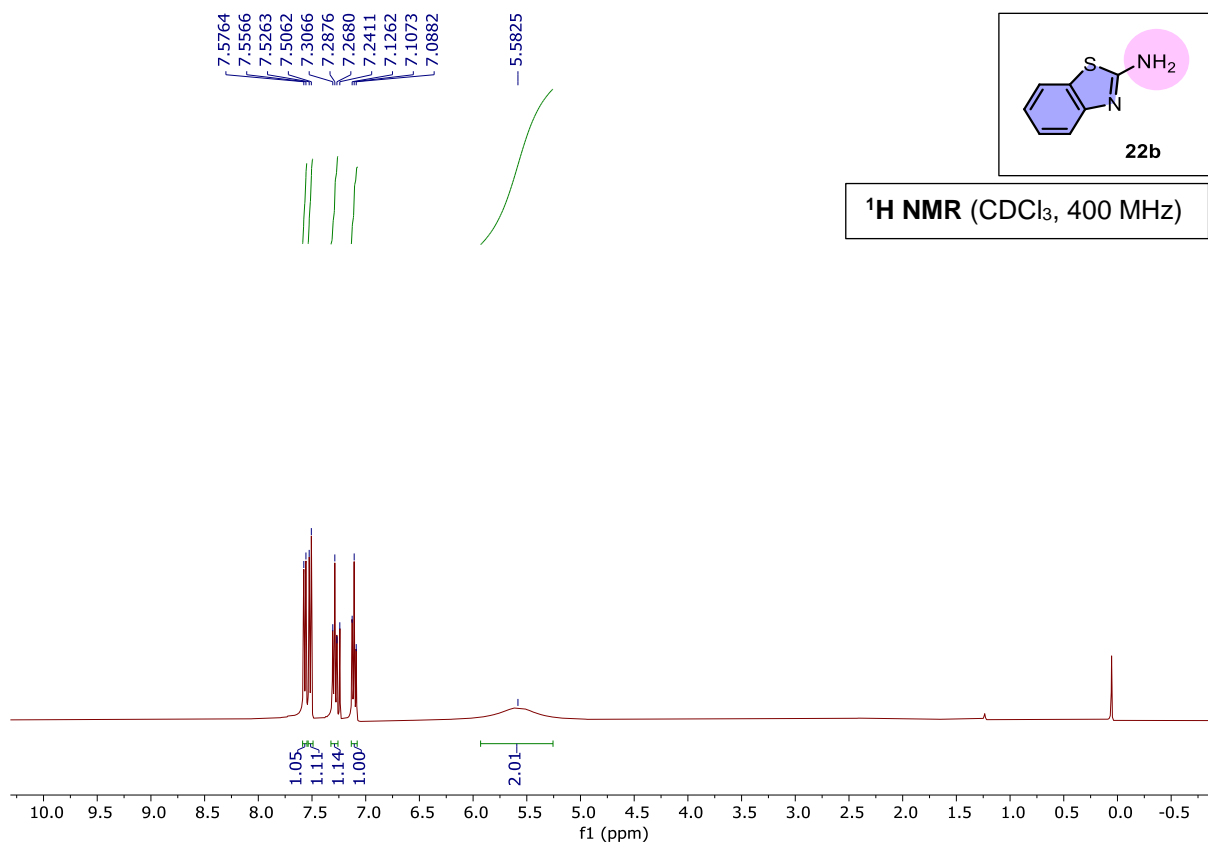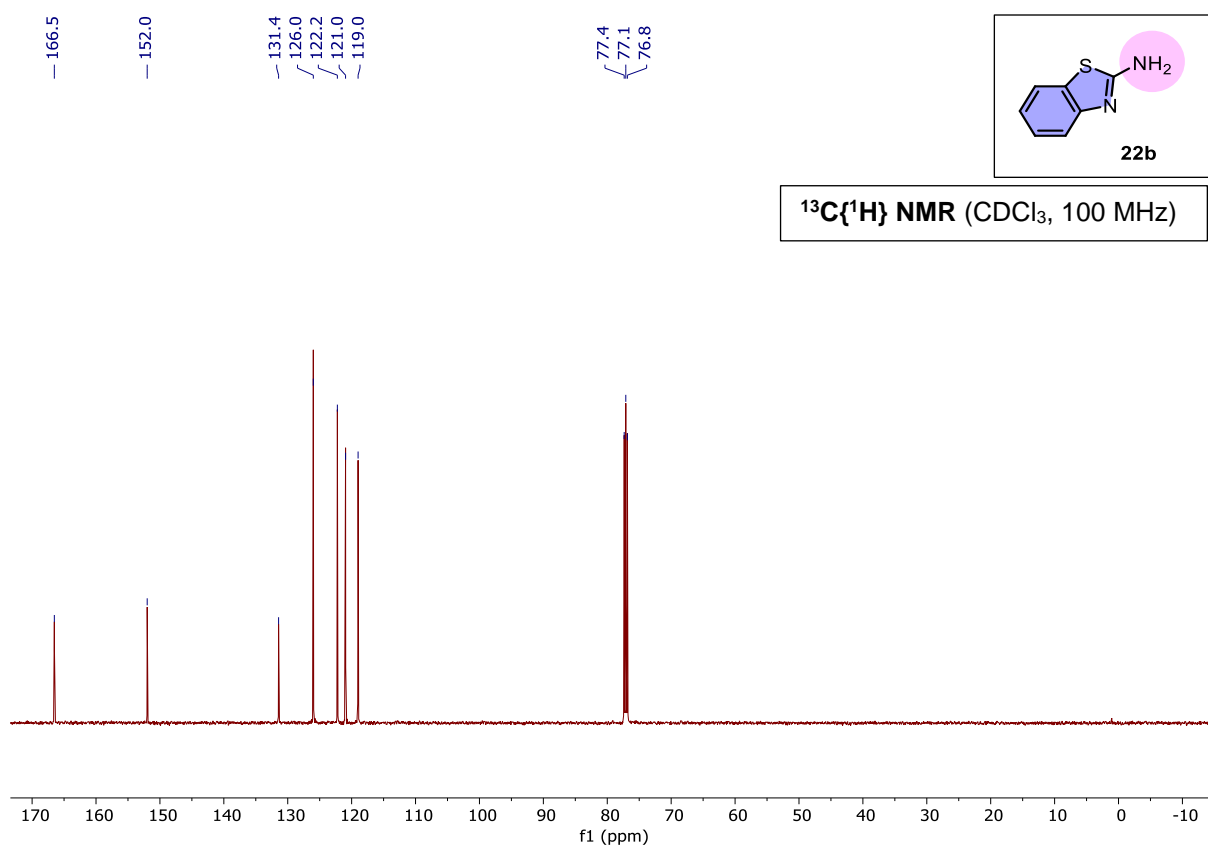

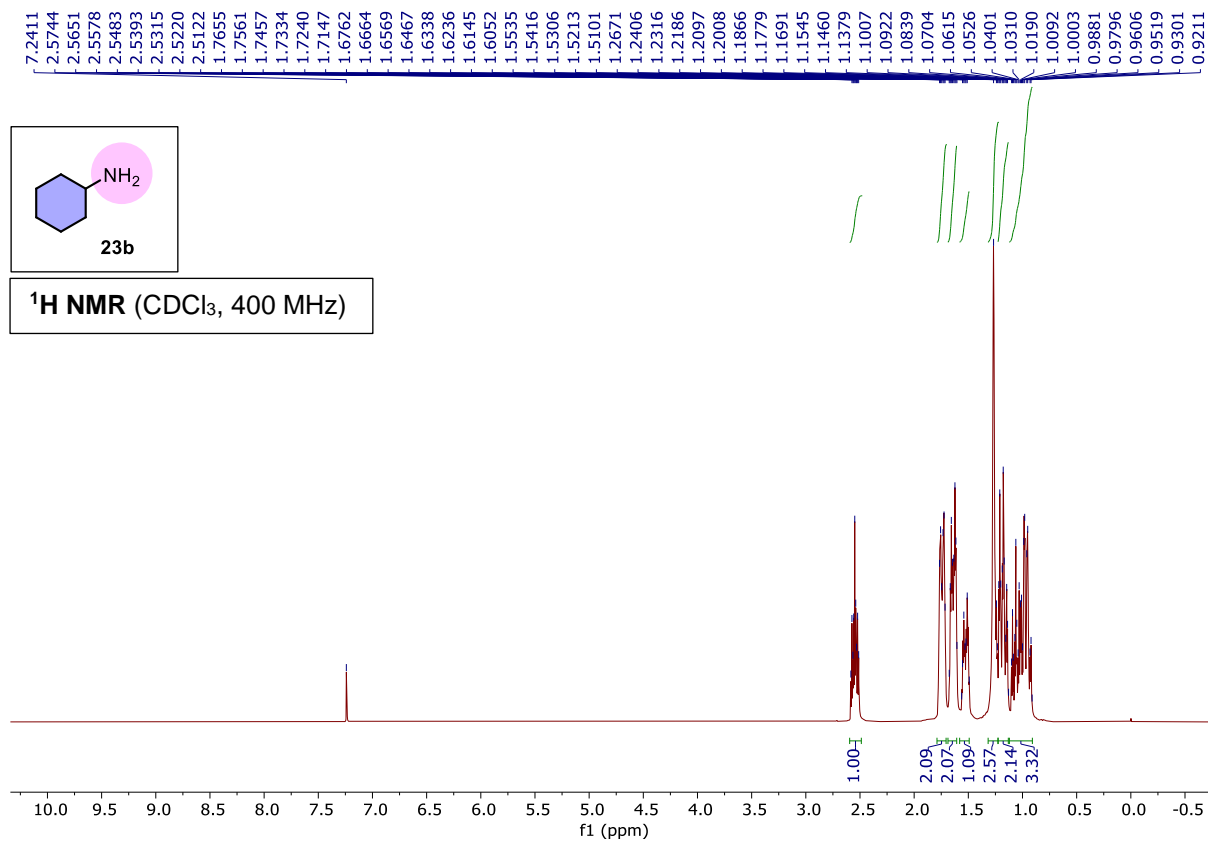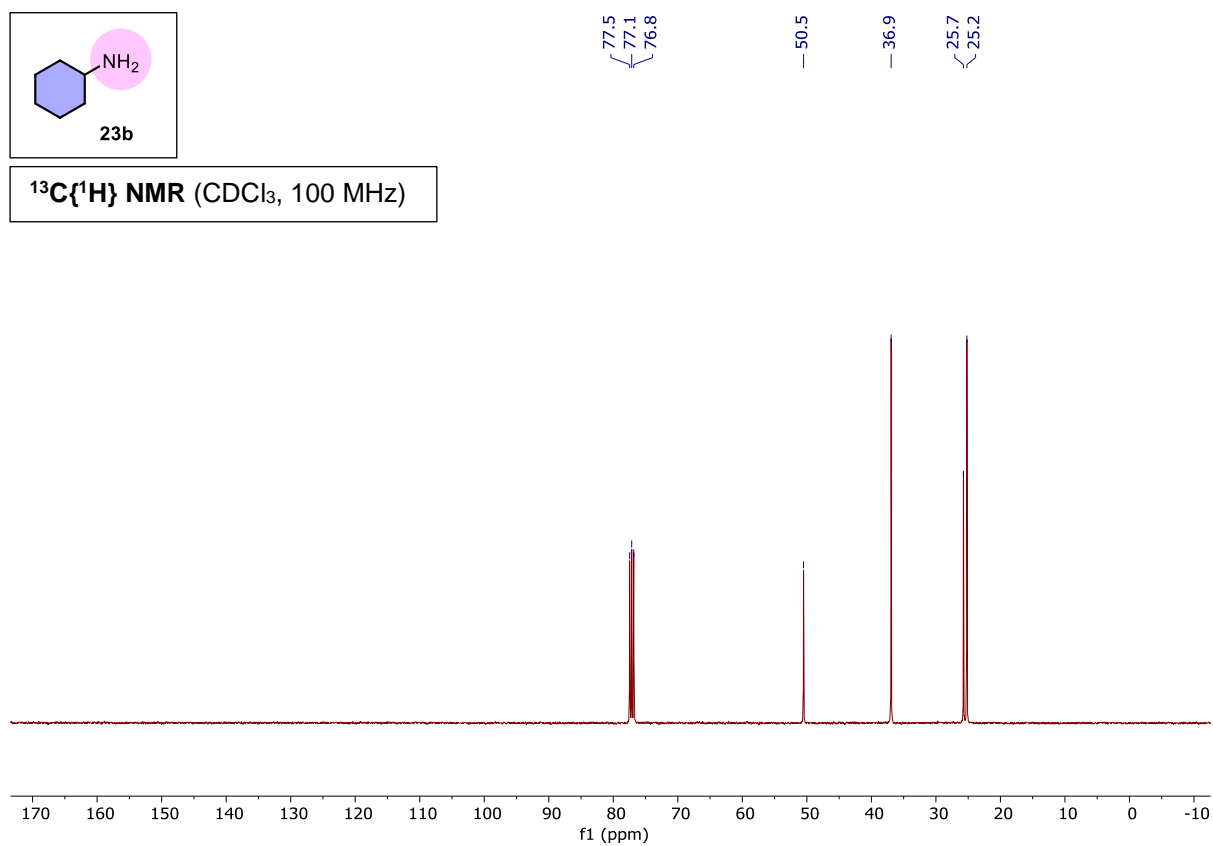

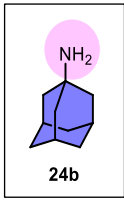

$^1\text{H NMR}$  ( $\text{CDCl}_3$ , 400 MHz)

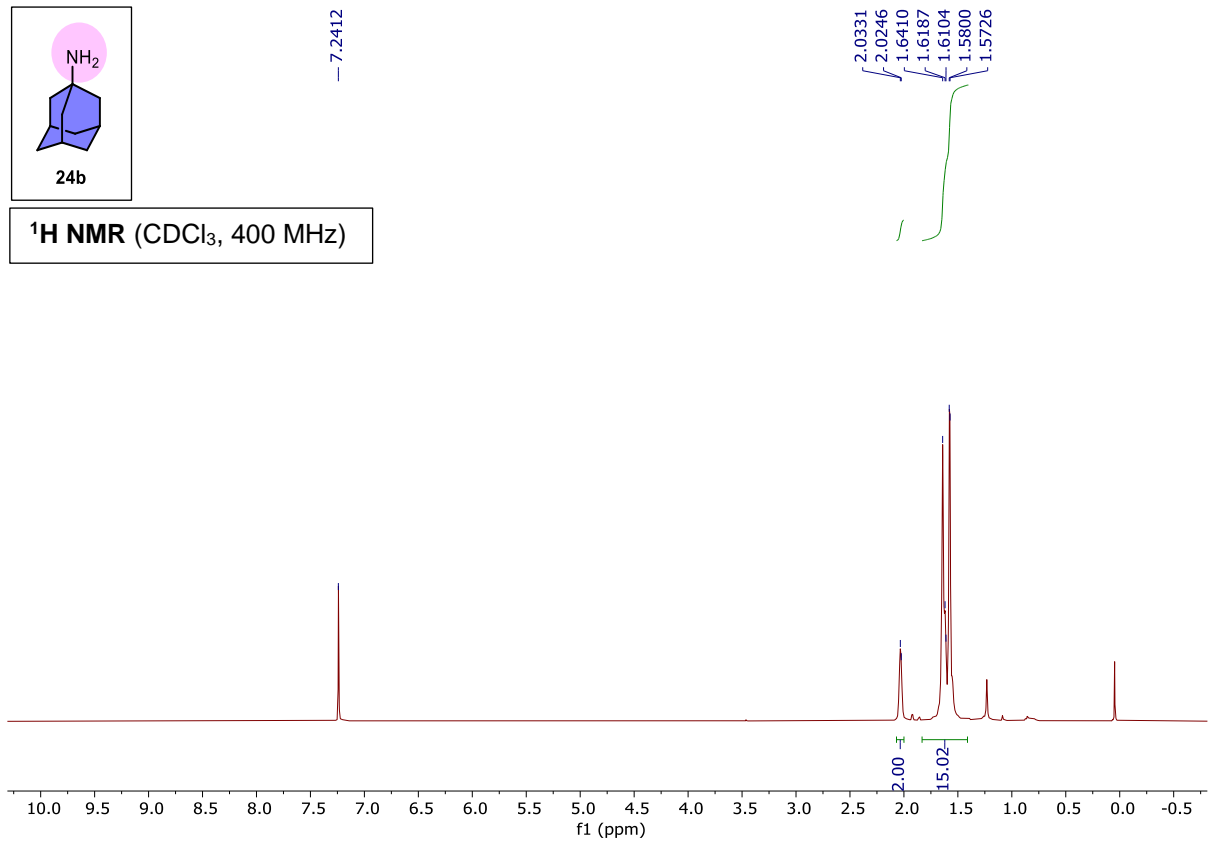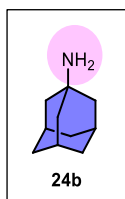

$^{13}\text{C}\{^1\text{H}\}$  NMR ( $\text{CDCl}_3$ , 100 MHz)

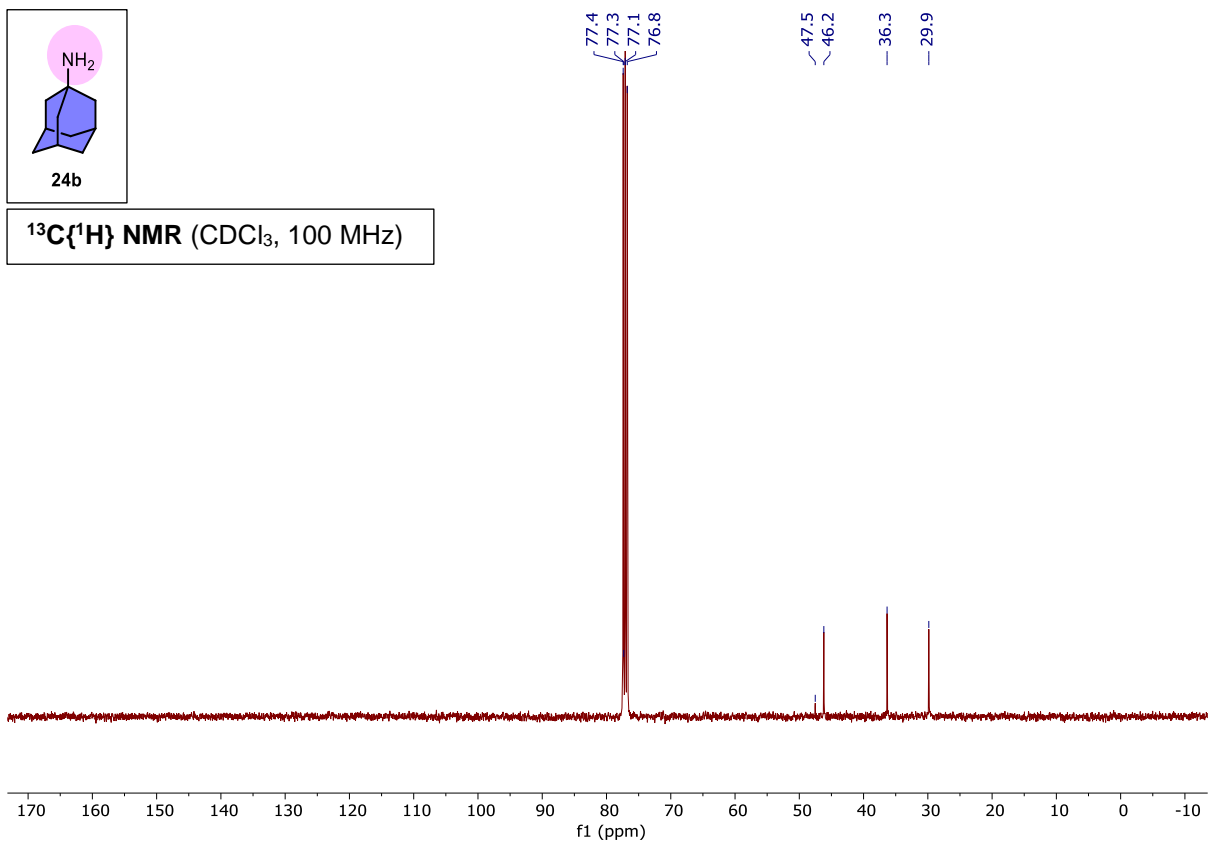

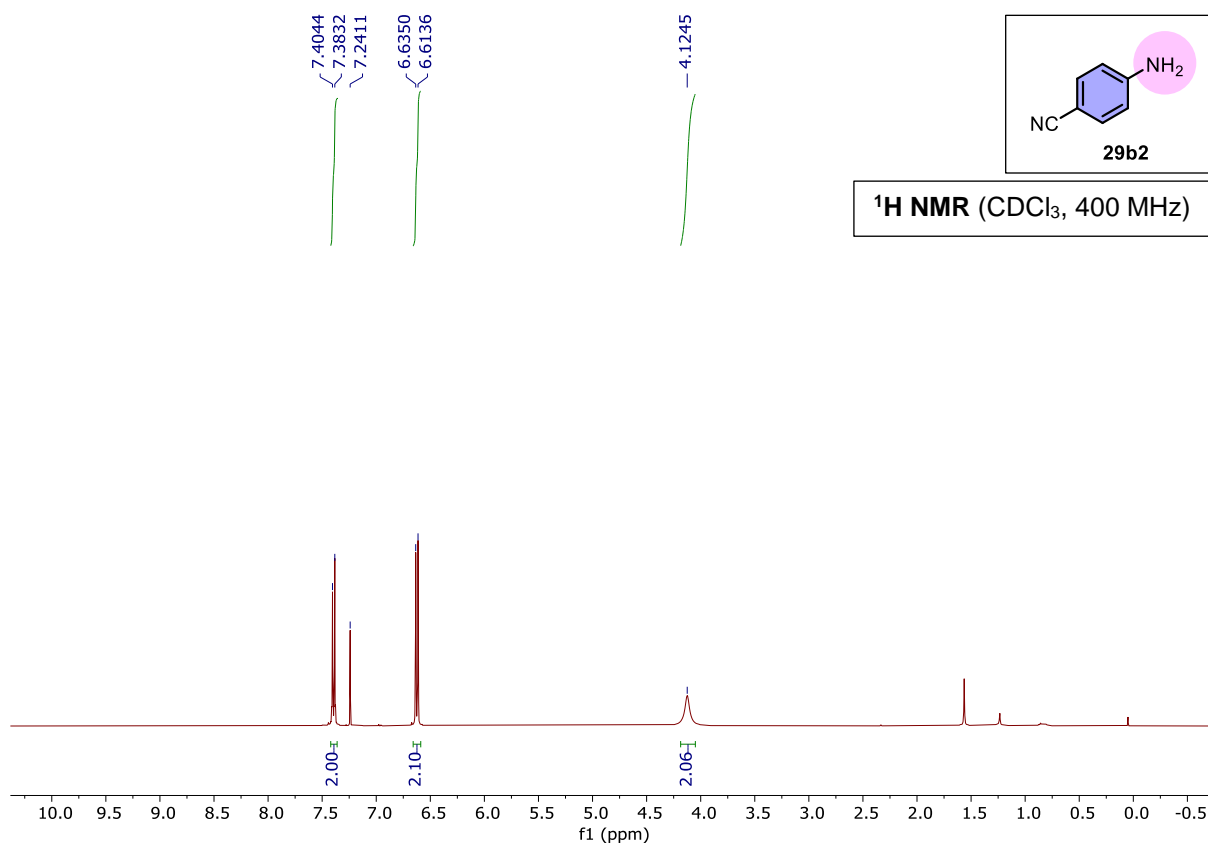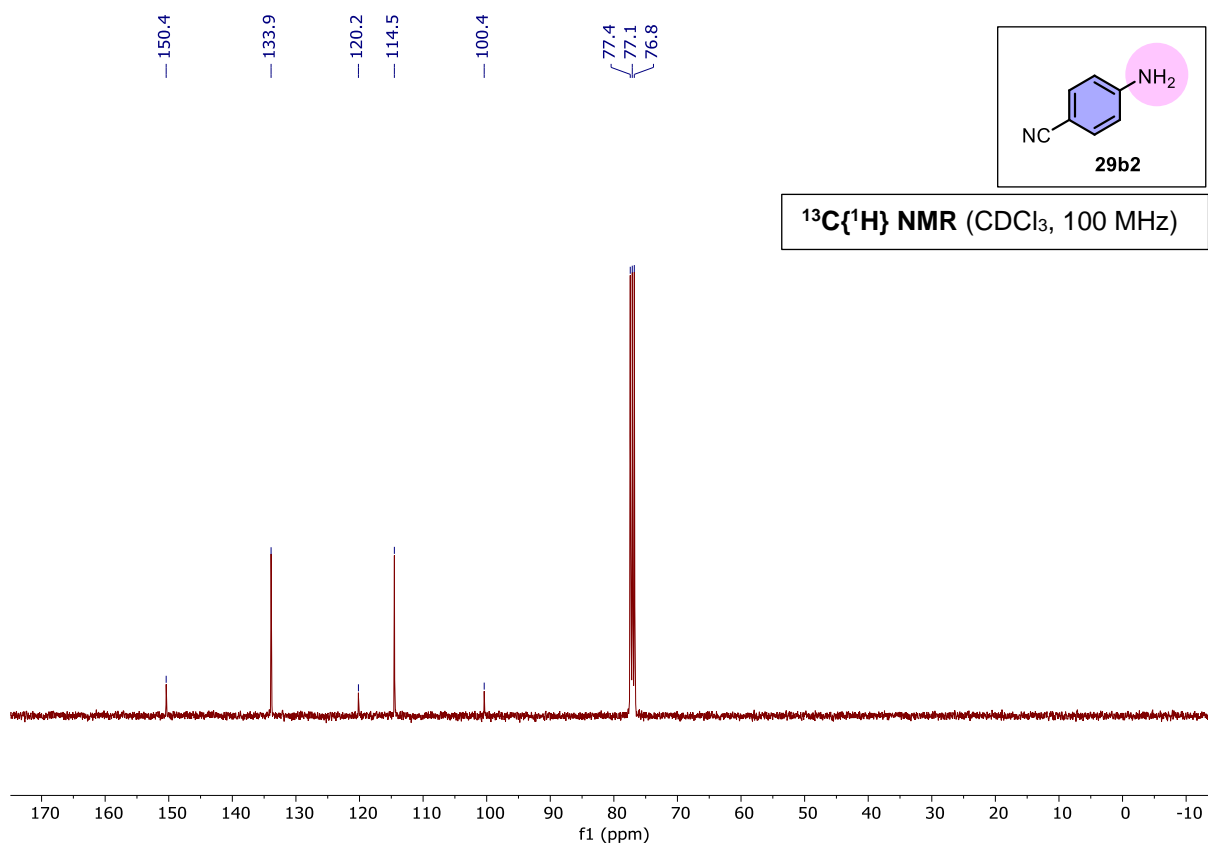

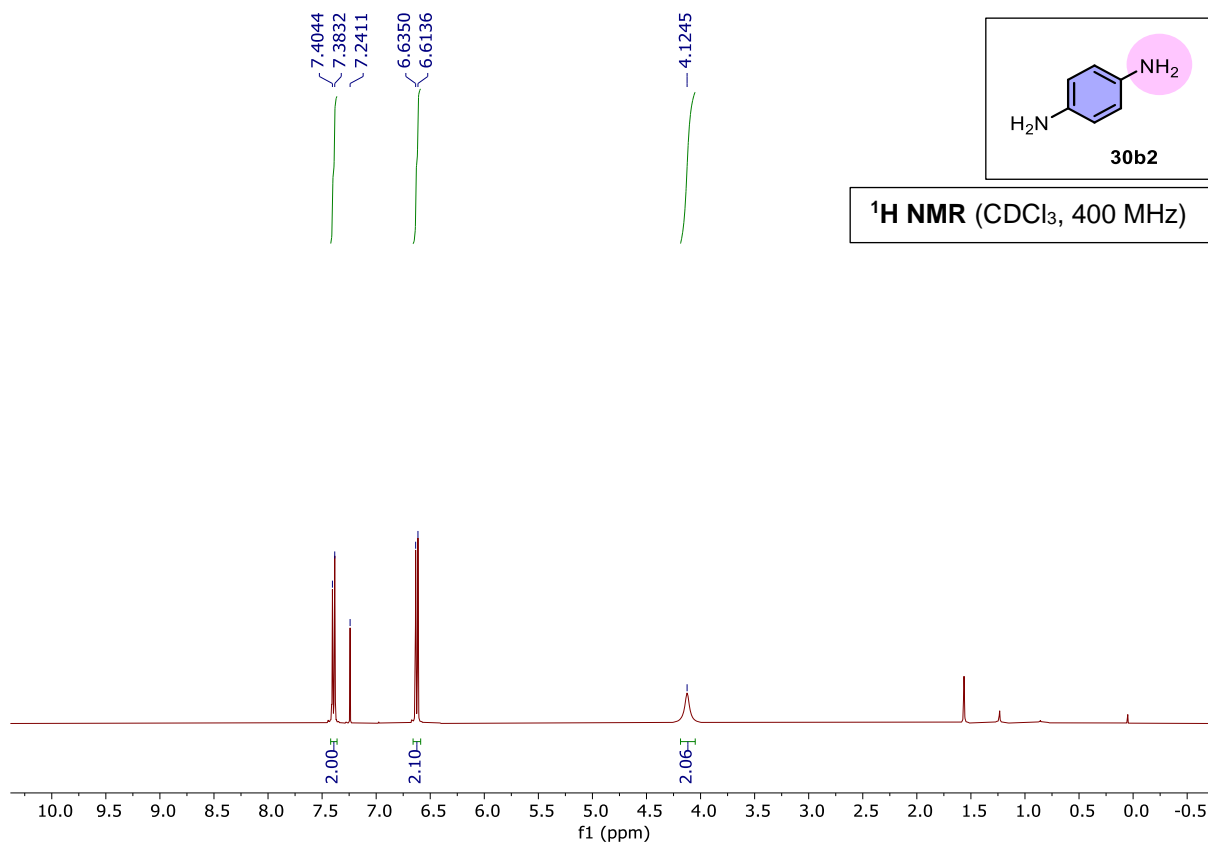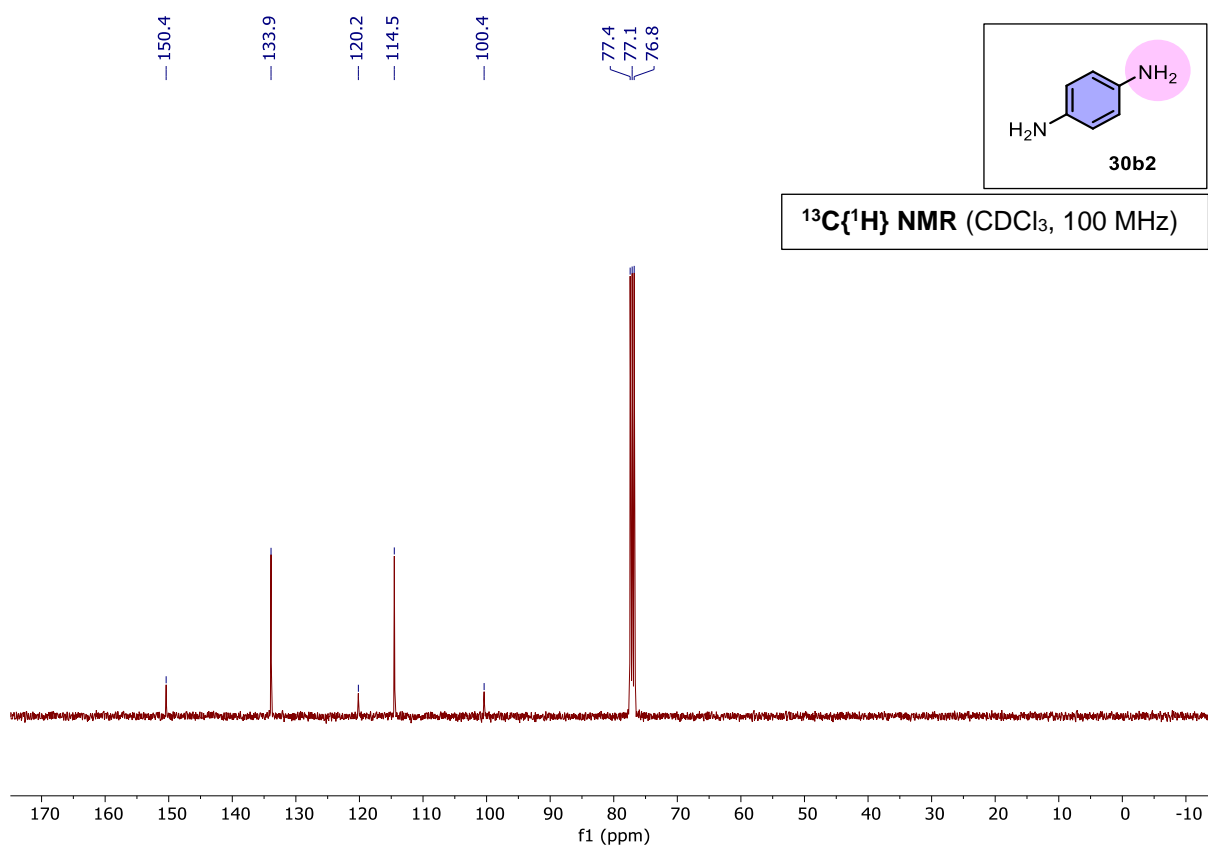



## Reference:

1. H. Yang, L. Shang, Q. Zhang, R. Shi, G. I. N. Waterhouse, L. Gu and T. Zhang, *Nat. Commun.*, 2019, **10**, 4585.
2. J. Gao, L. Feng, R. Ma, B.-J. Su, A. M. Alenad, Y. Liu, M. Beller and R. V. Jagadeesh, *Chem Catal.*, 2022, **2**, 178-194.
3. D. Panja, S. Dey and S. Kundu, *J. Environ. Chem. Eng.*, 2023, **11**, 109607.
4. X. Wang, X. Wang, C. Xia and L. Wu, *Green Chem.*, 2019, **21**, 4189-4193.
5. J. Long, D. Kumar, C. Deo, P. Retailleau, G. V. Dubacheva, G. Royal, J. Xie and N. Bogliotti, *Chem. Eur. J.*, 2021, **27**, 9563-9570.
6. R. J. Rahaim and R. E. Maleczka, *Org. Lett.*, 2005, **7**, 5087-5090.
7. J. Gao, S. Bhunia, K. Wang, L. Gan, S. Xia and D. Ma, *Org. Lett.*, 2017, **19**, 2809-2812.
8. S. Lee, M. Jørgensen and J. F. Hartwig, *Org. Lett.*, 2001, **3**, 2729-2732.
9. K. Sarkar, K. Das, A. Kundu, D. Adhikari and B. Maji, *ACS Catal.*, 2021, **11**, 2786-2794.
10. H.-J. Xu, Y.-F. Liang, Z.-Y. Cai, H.-X. Qi, C.-Y. Yang and Y.-S. Feng, *J. Org. Chem.*, 2011, **76**, 2296-2300.
11. K. Maeda, R. Matsubara and M. Hayashi, *Org. Lett.*, 2021, **23**, 1530-1534.
12. J. T. Markiewicz, O. Wiest and P. Helquist, *J. Org. Chem.*, 2010, **75**, 4887-4890.
13. Y. Motoyama, K. Kamo and H. Nagashima, *Org. Lett.*, 2009, **11**, 1345-1348.
14. H. Xu and C. Wolf, *Chem. Commun.*, 2009, 3035-3037.
15. R. R. Behera, S. Panda, R. Ghosh, A. A. Kumar and B. Bagh, *Org. Lett.*, 2022, **24**, 9179-9183.
16. J. Zhao, H. Huang, W. Wu, H. Chen and H. Jiang, *Org. Lett.*, 2013, **15**, 2604-2607.
17. X. Jv, S. Sun, Q. Zhang, M. Du, L. Wang and B. Wang, *ACS Sustain. Chem. Eng.*, 2020, **8**, 1618-1626.
18. N. E. Behnke, R. Kielawa, D.-H. Kwon, D. H. Ess and L. Kürti, *Org. Lett.*, 2018, **20**, 8064-8068.
19. H. B. S. G. W. T. M.J. Frisch, G.E. Scuseria, M.A. Robb, J.R. Cheeseman, G., V. B., B. M. Scalmani, G.A. Petersson, H. Nakatsuji, M. Caricato, X. Li, H.P., A. F. I. Hratchian,, G. Z. J. Bloino, J.L. Sonnenberg, M. Hada, M. Ehara, K. Toyota,, J. H. R. Fukuda, M. Ishida,, Y. H. T. Nakajima, O. Kitao, H. Nakai, T. Vreven, J.A., J. E. P. Montgomery, F. Ogliaro, M., J. J. H. Bearpark, E. Brothers, K.N. Kudin, V.N., R. K. Staroverov, J. Normand, K., A. R. Raghavachari, J.C. Burant, S.S. Iyengar,, M. C. J. Tomasi, N. Rega, J.M. Millam, M., J. E. K. Klene, J.B. Cross, V. Bakken, C., J. J. Adamo, R. Gomperts, R.E. Stratmann, O. Yazyev,, R. C. A.J. Austin, C., J. W. O. Pomelli, R.L. Martin, K. Morokuma, V.G. Zakrzewski, G.A., P. S. Voth, , S. D. J.J. Dannenberg, A.D. Daniels, Farkas, J.B. Foresman, J.V. Ortiz, J. and a. D. J. F. Cioslowski, *Gaussian 09, Revision A.02; Gaussian, Inc., Wallingford CT: 2016.*
20. C. Y. Legault, *CYLVIEW20; Université de Sherbrooke, 2020 (http://www.cylview.org)*
21. W. J. Hehre, R. Ditchfield and J. A. Pople, *J. Chem. Phys.*, 1972, **56**, 2257-2261.
22. Y. Zhao and D. G. Truhlar, *Theor. Chem. Acc.*, 2008, **120**, 215-241.
23. K. Raghavachari and G. W. Trucks, *J. Chem. Phys.*, 1989, **91**, 1062-1065.
24. J. Tomasi, B. Mennucci and R. Cammi, *Chem. Rev.*, 2005, **105**, 2999-3094.
